# Supplementary material for: Heterogeneity of the GFP fitness landscape and data-driven protein design
Source: eLife. 2022 May 5;11:e75842. doi: 10.7554/eLife.75842 (PMC9119679; doi:10.7554/eLife.75842)
Supplement: Source data 1. [file elife-75842-data1.xlsx]

## Sheet: FACS_gate_border_values
gene	FACS_machine	gate_ID	gate_border_lower	gate_border_upper	comments
amacGFP	A	3	0	859
amacGFP	A	4	860	1556
amacGFP	A	5	1556	2809
amacGFP	A	6	2805	4317
amacGFP	A	7	4312	6737
amacGFP	A	8	6781	9521
amacGFP	A	9	9560	14323
amacGFP	A	10	14374	19374
amacGFP	B	3	0	936
amacGFP	B	4	937	1586
amacGFP	B	5	1587	2922
amacGFP	B	6	2909	4578
amacGFP	B	7	4557	8026
amacGFP	B	8	8047	11545
amacGFP	B	9	11546	16087
amacGFP	B	10	16291	21291
cgreGFP	A	3	0	1190
cgreGFP	A	4	1192	2485
cgreGFP	A	5	2488	5100
cgreGFP	A	6	5117	10666
cgreGFP	A	7	10701	18297
cgreGFP	A	8	18304	25924
cgreGFP	A	9	25928	37573
cgreGFP	A	10	37608	50144
cgreGFP	B	3	0	1168
cgreGFP	B	4	1172	2703
cgreGFP	B	5	2703	6112
cgreGFP	B	6	6145	12099
cgreGFP	B	7	12134	19068
cgreGFP	B	8	19116	26853
cgreGFP	B	9	26722	36714
cgreGFP	B	10	36747	48996
ppluGFP	A	3	0	1190
ppluGFP	A	4	1193	2480
ppluGFP	A	5	2487	5111
ppluGFP	A	6	5117	10682
ppluGFP	A	7	10750	14110
ppluGFP	A	8	14182	19211
ppluGFP	A	9	19212	25285
ppluGFP	A	10	25289	33718
ppluGFP	B	3	0	1168
ppluGFP	B	4	1176	2297
ppluGFP	B	5	2304	4332
ppluGFP	B	6	4339	7670
ppluGFP	B	7	7670	12448
ppluGFP	B	8	12450	17316
ppluGFP	B	9	17320	24120
ppluGFP	B	10	24133	32177
avGFP	R0	8	-467	32	from https://doi.org/10.1038/nature17995, not used in the current analysis
avGFP	R0	7	39	131	from https://doi.org/10.1038/nature17995, not used in the current analysis
avGFP	R0	6	132	267	from https://doi.org/10.1038/nature17995, not used in the current analysis
avGFP	R0	5	272	710	from https://doi.org/10.1038/nature17995, not used in the current analysis
avGFP	R0	4	730	2110	from https://doi.org/10.1038/nature17995, not used in the current analysis
avGFP	R0	3	2134	4405	from https://doi.org/10.1038/nature17995, not used in the current analysis
avGFP	R0	2	4406	8674	from https://doi.org/10.1038/nature17995, not used in the current analysis
avGFP	R0	1	8738	29059	from https://doi.org/10.1038/nature17995, not used in the current analysis
avGFP	R1	8	-394	41	from https://doi.org/10.1038/nature17995, not used in the current analysis
avGFP	R1	7	41	99	from https://doi.org/10.1038/nature17995, not used in the current analysis
avGFP	R1	6	124	268	from https://doi.org/10.1038/nature17995, not used in the current analysis
avGFP	R1	5	272	739	from https://doi.org/10.1038/nature17995, not used in the current analysis
avGFP	R1	4	743	3245	from https://doi.org/10.1038/nature17995, not used in the current analysis
avGFP	R1	3	1400	3360	from https://doi.org/10.1038/nature17995, not used in the current analysis
avGFP	R1	2	3363	8063	from https://doi.org/10.1038/nature17995, not used in the current analysis
avGFP	R1	1	13361	38636	from https://doi.org/10.1038/nature17995, not used in the current analysis
avGFP	R2	8	-509	32	from https://doi.org/10.1038/nature17995, not used in the current analysis
avGFP	R2	7	39	109	from https://doi.org/10.1038/nature17995, not used in the current analysis
avGFP	R2	6	110	252	from https://doi.org/10.1038/nature17995, not used in the current analysis
avGFP	R2	5	257	717	from https://doi.org/10.1038/nature17995, not used in the current analysis
avGFP	R2	4	661	1856	from https://doi.org/10.1038/nature17995, not used in the current analysis
avGFP	R2	3	1904	4405	from https://doi.org/10.1038/nature17995, not used in the current analysis
avGFP	R2	2	4406	10411	from https://doi.org/10.1038/nature17995, not used in the current analysis
avGFP	R2	1	10412	38276	from https://doi.org/10.1038/nature17995, not used in the current analysis
avGFP	R3	8	-468	30	from https://doi.org/10.1038/nature17995, not used in the current analysis
avGFP	R3	7	31	89	from https://doi.org/10.1038/nature17995, not used in the current analysis
avGFP	R3	6	90	254	from https://doi.org/10.1038/nature17995, not used in the current analysis
avGFP	R3	5	252	680	from https://doi.org/10.1038/nature17995, not used in the current analysis
avGFP	R3	4	695	2202	from https://doi.org/10.1038/nature17995, not used in the current analysis
avGFP	R3	3	2237	4868	from https://doi.org/10.1038/nature17995, not used in the current analysis
avGFP	R3	2	4949	10770	from https://doi.org/10.1038/nature17995, not used in the current analysis
avGFP	R3	1	10736	34391	from https://doi.org/10.1038/nature17995, not used in the current analysis

## Sheet: machine A  machine B – linear r
protein	intercept	p_value	r_value	slope	std_err
cgreGFP	-72.0047	7.37774e-08	0.996907	1.02349	0.032938
amacGFP	417.721	8.50688e-09	0.998495	1.08972	0.024432
ppluGFP	-235.901	1.96938e-06	0.990743	0.972269	0.054387

## Sheet: Sheet2
gene	replica	gate ID	gate_border_lower	gate_border_upper
avGFP	R0	8	-467	32
avGFP	R0	7	39	131
avGFP	R0	6	132	267
avGFP	R0	5	272	710
avGFP	R0	4	730	2110
avGFP	R0	3	2134	4405
avGFP	R0	2	4406	8674
avGFP	R0	1	8738	29059
avGFP	R1	8	-394	41
avGFP	R1	7	41	99
avGFP	R1	6	124	268
avGFP	R1	5	272	739
avGFP	R1	4	743	3245
avGFP	R1	3	1400	3360
avGFP	R1	2	3363	8063
avGFP	R1	1	13361	38636
avGFP	R2	8	-509	32
avGFP	R2	7	39	109
avGFP	R2	6	110	252
avGFP	R2	5	257	717
avGFP	R2	4	661	1856
avGFP	R2	3	1904	4405
avGFP	R2	2	4406	10411
avGFP	R2	1	10412	38276
avGFP	R3	8	-468	30
avGFP	R3	7	31	89
avGFP	R3	6	90	254
avGFP	R3	5	252	680
avGFP	R3	4	695	2202
avGFP	R3	3	2237	4868
avGFP	R3	2	4949	10770
avGFP	R3	1	10736	34391
