# Supplementary material for: Heterogeneity of the GFP fitness landscape and data-driven protein design
Source: eLife. 2022 May 5;11:e75842. doi: 10.7554/eLife.75842 (PMC9119679; doi:10.7554/eLife.75842)
Supplement: Source data 3. — Mutations in genotypes are labeled in the format AiB, where A is the original wildtype state, B is the mutated state, and i is the position (counting starts from Methionine = 0). In the nucleotide dataset, 'n_replicates' refers to the combined number of distinct barcodes representing a genotype and machines it was measured on. In the amino acid dataset, 'n_replicates' refers to the number of synonymous nucleotide sequences measured for each protein sequence. Nucleotide genotypes and amino acid genotypes are on separate tabs in the file. [file elife-75842-data3.xlsx]

## Sheet: nucleotide_genotypes
nt_genotype	aa_genotype_pseudo	gene	total_cell_count	n_replicates	replicates_stdev_weighted	replicates_mean_brightness	index_of_dispersion	aa_genotype_native
A30T:A610T	I13F:Q210L	amacGFP	124.57	9	1456.12	7606.85	278.732	I10F:Q203L
A153G	K54E	amacGFP	834.16	66	1117.4	8904.46	140.221	K51E
A235T:C341T:T589C	K81M:I203T	amacGFP	50.96	4	1220.78	8362.85	178.205	K78M:I196T
G33T:C518T	V14L	amacGFP	208.03	23	1189.87	9418.09	150.327	V11L
T31C:T432C	I13T:F148L	amacGFP	37.42	7	216.484	543.515	86.2263	I10T:F144L
C705T	wt	amacGFP	244.55	23	852.792	9207.96	78.9811	wt
G33T:C408A	V14L:L140M	amacGFP	564.66	37	1116.47	8895.95	140.12	V11L:L136M
G33T:T339A	V14L:F117I	amacGFP	521.71	36	1070.82	8853.12	129.519	V11L:F113I
G10C:T114A:C372T:T382C	G6A:Y41N:M131T	amacGFP	42.14	4	467.714	8566.05	25.5376	G3A:Y38N:M127T
G20T:A337G:A381T	K116R:M131L	amacGFP	85.87	6	701.019	8006.9	61.3756	K112R:M127L
G33T	V14L	amacGFP	348416	25162	1277.89	9147.06	178.527	V11L
A427T	Y146F	amacGFP	1228.58	89	1447.65	9430.76	222.218	Y142F
G82T	S30I	amacGFP	656.78	42	1171.05	8878.81	154.453	S27I
G581A	wt	amacGFP	562.42	33	1510.91	9332.36	244.616	wt
G383T:A610G	M131I:Q210R	amacGFP	69.08	2	933.241	9356.67	93.0822	M127I:Q203R
G33T:G513A	V14L:E175K	amacGFP	506.03	39	1576.51	9619.23	258.375	V11L:E171K
T34A	V14E	amacGFP	1046.35	114	1236.1	7063.98	216.302	V11E
C684T	H236Y	amacGFP	1376.4	117	1360.2	9214.1	200.794	H228Y
G33T:A436G:A703T	V14L:N149S:E242V	amacGFP	41.24	6	508.847	4378.63	59.134	V11L:N145S:E234V
T203A:C324A:A351G:A603C:C644T	R112S:T121A:S208R	amacGFP	77.21	8	764.503	7583.75	77.068	R108S:T117A:S201R
G33T:C119T:G164C	V14L	amacGFP	108.03	16	829.027	8314.51	82.661	V11L
A312G:T326A:A417G:A436T	K108E:K143E:N149I	amacGFP	26.98	3	631.968	1177.64	339.139	K104E:K139E:N145I
A133G:A709G	K47R:Y244C	amacGFP	32.58	7	1609.33	7699.62	336.373	K44R:Y236C
A269G:G371T:A508T:C518T:C684T	E127D:N173I:H236Y	amacGFP	49.01	3	130.455	4723.96	3.6026	E123D:N169I:H228Y
G33T:T47C:A394T	V14L:E135V	amacGFP	38.18	5	1278.27	7007.79	233.165	V11L:E131V
G33T:A435G:A568G:C600A:A664T:C690A	V14L:N149D:D193G:L207M:E229V:H238N	amacGFP	49.86	6	57.8817	477.374	7.01817	V11L:N145D:D189G:L200M:E221V:H230N
wt	wt	amacGFP	472000	40012	1788.27	9284.9	344.42	wt
G33T:T492C	V14L:F168L	amacGFP	851.66	63	681.907	3891.95	119.477	V11L:F164L
C690A	H238N	amacGFP	11431.6	943	1431.47	9552.79	214.503	H230N
A445T	N152I	amacGFP	1131.72	62	1156.69	12404.4	107.859	N148I
A313G:A436T:T473A:A514T:A603T	K108R:N149I:N161K:E175V:S208C	amacGFP	95.72	3	187.296	2643.99	13.2677	K104R:N145I:N157K:E171V:S201C
C51T:A634G	N218S	amacGFP	30.08	2	697.395	7611.96	63.8942	N211S
G33T:C617T	V14L	amacGFP	460.62	26	956.829	8978.31	101.97	V11L
T292C:G467A	I101T	amacGFP	62.61	5	127.44	524.658	30.9555	I97T
G33T:G125T:A484G	V14L:K165R	amacGFP	47.74	3	816.5	9539.63	69.8845	V11L:K161R
G33T:G378T:T706G	V14L:G130C:L243R	amacGFP	40.12	4	655.036	6179.44	69.4355	V11L:G126C:L235R
G33T:T450A	V14L:Y154N	amacGFP	185.37	24	1547.96	9437.74	253.892	V11L:Y150N
C59T:C179T:A240T:T326C:G570A	N83Y:G194S	amacGFP	60.46	5	663.005	8406.49	52.29	N80Y:G190S
C656A:C690A	H238N	amacGFP	50.98	6	1307.22	9297.52	183.794	H230N
C533T	wt	amacGFP	799.87	70	1259.15	9694.57	163.54	wt
A471G	N161D	amacGFP	424.6	42	1642.81	8725.79	309.293	N157D
T641A	wt	amacGFP	1071.27	87	1496.29	9545.28	234.553	wt
A391T:T526A	K134M:V179E	amacGFP	79.96	7	907.969	8642.93	95.3851	K130M:V175E
A106T:G396T:C690A	D38V:D136Y:H238N	amacGFP	48.69	8	1182.53	6729.86	207.785	D35V:D132Y:H230N
G33T:T493A	V14L:F168Y	amacGFP	405.37	43	1318.89	3385.35	513.824	V11L:F164Y
G33T:A343C:T674C	V14L:E118A	amacGFP	73.03	10	729.18	8082.96	65.7807	V11L:E114A
G33T:C404T	V14L	amacGFP	263.85	20	1082.72	9216.91	127.188	V11L
G33T:C285T:G392A	V14L:R99C	amacGFP	28.16	4	66.9052	567.221	7.89165	V11L:R95C
G33T:A253G:C264T:A456G:A595G	V14L:K87R:P92S:M156V:H205R	amacGFP	26	2	72.6687	513.213	10.2896	V11L:K84R:P88S:M152V:H198R
C575A:C690A	H238N	amacGFP	170.81	16	1202.28	9109.86	158.672	H230N
A3G:G194A:C260T:G342A:A442C:C569G	S1G:E118K:H151P:D193E	amacGFP	27.19	6	222.026	621.464	79.3219	S1G:E114K:H147P:D189E
T19A:G258A:G267A	L9Q:A89T:E93K	amacGFP	67.65	7	648.299	8083.39	51.9944	L6Q:A86T:E89K
C98A:T107A:T192G:T204A:T207G:A253T:C347T:A424T:T493C:G537A:T557A:A592G:C690T	D38E:S67A:L71M:C72G:K87M:E145V:F168S:D183N:N204S:H238Y	amacGFP	43.2	8	172.413	512.653	57.9851	D35E:S64A:L68M:C69G:K84M:E141V:F164S:D179N:N197S:H230Y
A121T:A147G	K43M:T52A	amacGFP	42.93	4	527.482	7873.01	35.3406	K40M:T49A
A361G:G622A:A664T:T680A	N124S:S214N:E229V:C234*	amacGFP	26.2	5	115.294	553.729	24.0058	N120S:S207N:E221V:C226*
G33T:A115T:A381G:G527T:A618T:A709G	V14L:Y41F:M131V:I213F:Y244C	amacGFP	28.37	4	1646.2	6692.94	404.903	V11L:Y38F:M127V:I206F:Y236C
C71T:A496T:A711G	K169M:K245E	amacGFP	40.16	2	502.339	8042.17	31.3777	K165M:K237E
G33T:C290G:A466T:G663A:G682T	V14L:K159M:E229K:G235V	amacGFP	26.22	5	63.7701	523.689	7.76535	V11L:K155M:E221K:G227V
T355A:A381T:C584G	L122Q:M131L:I198M	amacGFP	38.05	6	415.532	908.275	190.104	L118Q:M127L:I194M
G33T:T195A	V14L:Y68N	amacGFP	726.57	48	263.981	493.576	141.186	V11L:Y65N
G33T:T141A:C660T	V14L:C50S	amacGFP	38.29	3	781.805	8039.4	76.028	V11L:C47S
A376T:A402G	K129M:N138D	amacGFP	36.61	2	858.546	7455.22	98.8706	K125M:N134D
G57T:A227T:T339A:T580A:A691G	G22C:E78D:F117I:L197Q:H238R	amacGFP	35.35	7	790.628	2970.82	210.411	G19C:E75D:F113I:L193Q:H230R
C66A:C89T:G338C:G581T:A610T:A709G	H25N:K116N:Q210L:Y244C	amacGFP	93.98	4	1441.15	5705.58	364.013	H22N:K112N:Q203L:Y236C
A612G:G713A	T211A	amacGFP	38.41	5	264.87	1393.4	50.3491	T204A
A301G	Q104R	amacGFP	633.42	54	1250.86	9372.26	166.944	Q100R
G20T:T181C:G342A:C469T:T499C	V63A:E118K:A160V:I170T	amacGFP	46.12	5	255.267	1522.45	42.8	V60A:E114K:A156V:I166T
C586A	P199H	amacGFP	668.1	52	791.291	2731.55	229.226	P195H
G33T:G338A	V14L	amacGFP	122.56	13	1668.53	8500.9	327.495	V11L
G9A:C62A:A67G:A100G:C109T:G302T	G6S:D23E:H25R:E36G:A39V:Q104H	amacGFP	43.51	7	1088.03	4101.22	288.647	G3S:D20E:H22R:E33G:A36V:Q100H
G33T:A81C:T577A:A634T:T657C	V14L:S30R:V196E:N218I:F227L	amacGFP	46.67	8	1583.52	6329.4	396.175	V11L:S27R:V192E:N211I:F219L
C324A:A337G	R112S:K116R	amacGFP	38.54	3	392.029	8119.67	18.9277	R108S:K112R
C293A:A461G:C536A	wt	amacGFP	28.79	5	1574.3	9615.68	257.748	wt
G33T:T493A:A626G:T669A:T706C	V14L:F168Y:F231I:L243P	amacGFP	67.61	6	299.99	1927.87	46.6804	V11L:F164Y:F223I:L235P
G33T:A133T:T433A	V14L:K47M:F148Y	amacGFP	45.33	6	626.36	6029.72	65.0654	V11L:K44M:F144Y
T135C	F48L	amacGFP	1411.91	115	649.209	4717.46	89.3432	F45L
G33T:A106G:C230T	V14L:D38G	amacGFP	116.33	7	1064.39	6053.09	187.165	V11L:D35G
G33T:C642A	V14L:R222S	amacGFP	350.46	29	954.609	8761.88	104.005	V11L:R214S
G125T:T298A	F103Y	amacGFP	84.26	10	1710.95	8831.18	331.478	F99Y
G128T	E45D	amacGFP	390.79	27	1415.38	7945.08	252.142	E42D
A456G	M156V	amacGFP	1183.97	89	1488.14	9212.93	240.374	M152V
T657G	F227V	amacGFP	73.8	11	1455.29	7200.74	294.117	F219V
G33T:A319G	V14L:K110R	amacGFP	684.11	54	1483.63	8656.31	254.284	V11L:K106R
G243A	D84N	amacGFP	241.83	26	2018.95	8012.93	508.695	D81N
G33T:C161A:C256A:A505T	V14L:S88Y:H172L	amacGFP	43.08	4	267.505	2598.24	27.5412	V11L:S85Y:H168L
G33T:T577C	V14L:V196A	amacGFP	1245.58	111	1344.8	8014.36	225.654	V11L:V192A
G10C:A30G:A418T	G6A:I13V:K143M	amacGFP	31.08	2	876.922	10971.4	70.0906	G3A:I10V:K139M
G29T:G371A	wt	amacGFP	33.32	5	469.474	10702.4	20.594	wt
G15T:G33T:G270A:C431T:A547T:T680C	E8*:V14L:G94S:Q186L	amacGFP	33.19	2	213.126	621.209	73.1198	E5*:V11L:G90S:Q182L
C32T:G33T:A376G:A402C:T671A	V14L:K129R:N138H:F231L	amacGFP	160.26	6	486.28	6799.04	34.7797	V11L:K125R:N134H:F223L
C110T:T387A:G411A	F133I:G141R	amacGFP	84.83	2	213.771	10233.4	4.4656	F129I:G137R
A288G:A461T:A544T	T100A:Y185F	amacGFP	67.56	5	989.465	8209.65	119.255	T96A:Y181F
A445G	N152S	amacGFP	1186.06	96	1488.05	10263.8	215.738	N148S
A331T	E114V	amacGFP	1740.79	140	1422.19	9093.31	222.43	E110V
C512A	wt	amacGFP	149.19	15	923.738	9224.61	92.5016	wt
A67T:C506T	H25L	amacGFP	50.31	7	1496.59	7698.97	290.92	H22L
T511C:T632C	I174T	amacGFP	41.06	4	297.27	7530.38	11.7351	I170T
T708A	Y244N	amacGFP	664.72	54	1358.68	9724.98	189.823	Y236N
C305T:T358C:C692T	V123A	amacGFP	45.72	4	725.628	7490	70.2984	V119A
G33T:A445C:A495G:A508G:A514T	V14L:N152T:K169E:N173S:E175V	amacGFP	197.31	7	476.67	6967.55	32.6104	V11L:N148T:K165E:N169S:E171V
G607C	C209S	amacGFP	250.44	23	1975.45	14476.4	269.572	C202S
A269T	E93D	amacGFP	1527.92	93	1298.6	9841.04	171.36	E89D
T19A:G33T:T295C:G413A:T543A	L9Q:V14L:F102S:Y185N	amacGFP	81.44	7	808.969	8126.86	80.5269	L6Q:V11L:F98S:Y181N
A73T:T181C:A253T:A337G	H27L:V63A:K87M:K116R	amacGFP	30.72	3	2408.12	12945.1	447.973	H24L:V60A:K84M:K112R
G180A:A592T:C684G	V63M:N204I:H236D	amacGFP	42.72	9	260.964	607.021	112.191	V60M:N197I:H228D
C558T	P190S	amacGFP	129.74	8	609.095	7802.28	47.5497	P186S
C635T	wt	amacGFP	1359.99	108	1508.34	9667.45	235.334	wt
G125A:T297A:T388A	F103I:F133Y	amacGFP	104.01	13	344.919	615.234	193.372	F99I:F129Y
A429G:A614G	N147D	amacGFP	28.49	6	1047.46	9297.2	118.01	N143D
G33T:G422T	V14L	amacGFP	956.13	63	1158.35	8985.94	149.318	V11L
C145T:A456G:C620A	T51I:M156V	amacGFP	93.41	10	1128.34	8585.91	148.285	T48I:M152V
A127T	E45V	amacGFP	1293.86	85	1366.83	10141.1	184.223	E42V
A24T:C143T:G607A	T11S:C209Y	amacGFP	70.94	4	398.616	2336.51	68.005	T8S:C202Y
G57T	G22C	amacGFP	1145.39	104	1218.38	7880.06	188.379	G19C
A76G	K28R	amacGFP	1007.54	74	1840.38	9612.2	352.363	K25R
G33T:G82T	V14L:S30I	amacGFP	101.76	14	1459.14	9235.54	230.532	V11L:S27I
G33T:A120C:G369A	V14L:K43Q:E127K	amacGFP	33.53	2	57.0292	8877.3	0.366365	V11L:K40Q:E123K
T141A:A312G	C50S:K108E	amacGFP	64.2	7	677.645	7923.16	57.957	C47S:K104E
G33T:G50A	V14L	amacGFP	531.66	29	1010.15	8623.73	118.326	V11L
C257T:A301T:A472G:A505T:T669C	Q104L:N161S:H172L:F231L	amacGFP	34.4	4	953.63	8761.46	103.797	Q100L:N157S:H168L:F223L
A81G:A115T:T457G:A552G:C668T	S30G:Y41F:M156R:N188D	amacGFP	47.06	4	69.9391	543.916	8.99307	S27G:Y38F:M152R:N184D
G33T:A349G	V14L:D120G	amacGFP	890.71	75	1130.02	9024.79	141.494	V11L:D116G
G27A:G33T:G60T:G267C	G12R:V14L:D23Y:E93Q	amacGFP	131.45	4	402.644	8453.33	19.1785	G9R:V11L:D20Y:E89Q
G33T:C42T:A65C:C248T:T339A:G419T:A475G:T556C:A614T	V14L:F117I:K143N:N162S:V189A	amacGFP	34.22	4	903.716	7713.88	105.874	V11L:F113I:K139N:N158S:V185A
A55T:A614T	D21V	amacGFP	27.22	2	624.241	9195.07	42.3789	D18V
T457A	M156K	amacGFP	801.74	62	1281.45	9439.39	173.965	M152K
G33T:A592T	V14L:N204I	amacGFP	1936.56	110	865.224	8300.3	90.191	V11L:N197I
A553G	N188S	amacGFP	639.95	56	608.184	1644.08	224.982	N184S
A174T	T61S	amacGFP	715.9	75	1359.84	8336.12	221.827	T58S
T211G	F73C	amacGFP	202.68	13	886.115	9248.25	84.9025	F70C
A65T:A235C:A490G	K81T:N167S	amacGFP	48.5	4	826.136	9361.83	72.9025	K78T:N163S
G369A	E127K	amacGFP	223.68	30	1381.49	9187.15	207.738	E123K
G33T:T647C:T670A	V14L:F231Y	amacGFP	39.62	4	565.223	892.447	357.978	V11L:F223Y
G33T:A229T	V14L:H79L	amacGFP	1162.74	68	1202.81	7757.49	186.496	V11L:H76L
A100G:A313T:G458A:G537T:A553G:T678C	E36G:K108M:M156I:D183Y:N188S:C234R	amacGFP	106.02	7	186.938	767.613	45.5254	E33G:K104M:M152I:D179Y:N184S:C226R
G377T	K129N	amacGFP	230.37	20	1252.7	9399.33	166.955	K125N
A424T	E145V	amacGFP	1101.12	89	959.832	7933.82	116.12	E141V
G524T	wt	amacGFP	1358.23	115	1304.3	9459.82	179.835	wt
C167A:A231G:T294C:C566A:A610T:T657C	M80V:F102L:Q210L:F227L	amacGFP	47.91	2	821.007	5217.24	129.197	M77V:F98L:Q203L:F219L
G33T:T708A	V14L:Y244N	amacGFP	531.14	41	1147.59	9639.19	136.625	V11L:Y236N
G15T:C160T:A276T:A353G:A484G:T562A:A646G:G694A:T708A	E8*:P56L:I96F:K165R:L191*:D223G:G239D:Y244N	amacGFP	86.07	2	5.68434e-14	449	7.19638e-30	E5*:P53L:I92F:K161R:L187*:D215G:G231D:Y236N
A76T:C161T:A226C:G239A	K28M:E78A:M82I	amacGFP	70.07	4	1067.76	9113.92	125.095	K25M:E75A:M79I
A402G	N138D	amacGFP	1195.05	80	1102.12	8568.39	141.763	N134D
G33T:G364A:A610T	V14L:R125H:Q210L	amacGFP	41.25	2	680.774	6471.83	71.6109	V11L:R121H:Q203L
A319G:A489T:G527T:T632A	K110R:N167Y	amacGFP	77.8	4	482.403	8576.06	27.1352	K106R:N163Y
G33T:C630T	V14L:R217C	amacGFP	429.15	43	1198.16	9151.61	156.867	V11L:R210C
T192A:G263T:A626T	S67T:M90I:K215N	amacGFP	27.27	3	456.444	2119.79	98.2837	S64T:M87I:K208N
G33T:G88T:A610G	V14L:R32L:Q210R	amacGFP	26.91	2	809.795	11579.4	56.632	V11L:R29L:Q203R
A55G	D21G	amacGFP	1367.72	105	1107.07	9100.04	134.682	D18G
G33T:G393A:G410A	V14L:E135K	amacGFP	98.84	10	1441.01	9308.96	223.066	V11L:E131K
G33T:C690A	V14L:H238N	amacGFP	9473.39	703	1287.51	9149.7	181.172	V11L:H230N
C259G:A691T	A89G:H238L	amacGFP	70.29	4	689.801	6860.94	69.3527	A86G:H230L
T21C:T107A:C189T:A456G:C464T:C593A:A610G	F10L:D38E:M156V:N204K:Q210R	amacGFP	29.14	4	1252.12	9824.07	159.587	F7L:D35E:M152V:N197K:Q203R
G194A:A321T:T326A:T367C:C408A:T493A:T589A:G662T:C684T	T111S:I126T:L140M:F168Y:I203N:H236Y	amacGFP	29.34	3	66.572	552.724	8.01816	T107S:I122T:L136M:F164Y:I196N:H228Y
G33T:T124A:C179T:T487C	V14L:L44Q:V166A	amacGFP	88.66	6	1040.14	6284.2	172.161	V11L:L41Q:V162A
G33T:T210A:C354T	V14L:F73I	amacGFP	54.38	6	838.56	9188.93	76.525	V11L:F70I
G33T:A100T:T205C:C256A:G468T:A712G	V14L:E36V:L71S:S88Y:A160S:K245R	amacGFP	40.3	5	44.7471	464.263	4.31287	V11L:E33V:L68S:S85Y:A156S:K237R
A154G	K54R	amacGFP	1276.79	96	1199.47	9349.68	153.88	K51R
C98A:C109T:C640T	A39V:T221I	amacGFP	29.25	4	911.446	9731.23	85.3679	A36V:T213I
T657C	F227L	amacGFP	2112.12	154	1603.02	11353.8	226.328	F219L
T367C	I126T	amacGFP	724.31	65	883.972	7551.29	103.48	I122T
G33T:A67T:A268G:A331T:A436G:G673A	V14L:H25L:E93G:E114V:N149S:S232N	amacGFP	118.5	6	301.237	2976.34	30.4883	V11L:H22L:E89G:E110V:N145S:S224N
C38A:C68A:A132G:C146G:G357A:C566T:C676.:A687G:A700T	H25Q:K47E:V123M:C234V:H236M:T237L:H238T:G239A:M240W:D241S:E242S:L243C:Y244T:K245S	amacGFP	36.24	9	1507.67	5526.04	411.337	H22Q:K44E:V119M:C226V:H228M:T229L:H230T:G231A:M232W:D233S:E234S:L235C:Y236T:K237S
C500A	wt	amacGFP	104.52	18	1869.58	9680.03	361.087	wt
G33T:A45G	V14L:I18V	amacGFP	519.42	36	1123.8	9418.07	134.097	V11L:I15V
C68T	wt	amacGFP	1401.72	98	1157.56	9419.17	142.259	wt
C420T:T532A:G615A	L181H:A212T	amacGFP	114.53	13	1144.75	10344.2	126.686	L177H:A205T
T211C:G213A:G713A	F73S:A74T	amacGFP	26.02	5	60.8971	485.33	7.6411	F70S:A71T
G33T:G604T	V14L:S208I	amacGFP	355.57	27	1459.29	9765.43	218.068	V11L:S201I
T203A:A415T	H142L	amacGFP	81.83	4	284.422	8181.26	9.88794	H138L
A226T	E78V	amacGFP	918.26	96	1344.59	9348.44	193.392	E75V
T493C:G578A	F168S	amacGFP	202.17	17	142.121	479.577	42.117	F164S
T557C:A628C	D216A	amacGFP	71.54	9	863.986	7380.11	101.146	D209A
C172T:C690A	P60L:H238N	amacGFP	75.38	11	938.972	2384.18	369.798	P57L:H230N
G33T:C341T:A544T	V14L:Y185F	amacGFP	77.71	4	666.335	9520.8	46.6349	V11L:Y181F
C585A	P199T	amacGFP	189.17	20	647.787	5339.28	78.5926	P195T
G33T:A81T:T432C	V14L:S30C:F148L	amacGFP	41.23	4	68.9576	497.592	9.55633	V11L:S27C:F144L
G158A:T195C	Y68H	amacGFP	35.07	8	72.7499	513.894	10.2989	Y65H
G28C:G281T:C308T	G12A:Q97H	amacGFP	40.2	6	53.683	472.425	6.10015	G9A:Q93H
G33T:G281A	V14L	amacGFP	105.16	9	1043.39	8953.1	121.595	V11L
G63A:C92T:C278T:A331T:T340C:T661A	V24I:E114V:F117S:L228Q	amacGFP	37.32	7	647.9	5232.31	80.2274	V21I:E110V:F113S:L220Q
G33T:C431A:C446A:C584T:G693A	V14L:N147K:N152K:G239S	amacGFP	96.98	4	910.712	10269.5	80.7628	V11L:N143K:N148K:G231S
G93A	E34K	amacGFP	1094.1	81	1051.22	8481.72	130.288	E31K
G27T:G33T:G328C	G12W:V14L:G113A	amacGFP	30.6	6	465.282	6008.87	36.028	G9W:V11L:G109A
G384A:G497A:A514G	D132N:E175G	amacGFP	65.07	4	751.771	9207.19	61.3824	D128N:E171G
A201G:G345T:C684T	I70V:G119C:H236Y	amacGFP	118.79	9	387.971	7154.12	21.0398	I67V:G115C:H228Y
G33T:A75G:G622T:T669A	V14L:K28E:S214I:F231I	amacGFP	40.28	5	1508.67	10212.3	222.876	V11L:K25E:S207I:F223I
A319T:T492A:C575A:C623T	K110M:F168I	amacGFP	209.14	8	241.036	3500.04	16.5994	K106M:F164I
G33T:G158A:G527A	V14L	amacGFP	37.6	6	1251.05	8824.64	177.36	V11L
C104A	wt	amacGFP	970.55	76	1396.52	9723.75	200.566	wt
G151A:C469A:A475G:A700G	G53D:A160D:N162S:D241G	amacGFP	136.01	8	1428.18	9131.75	223.363	G50D:A156D:N158S:D233G
A6T:A154G:G194A:T454C	K2*:K54R:I155T	amacGFP	122.92	4	150.167	506.106	44.5562	K2*:K51R:I151T
T470A	wt	amacGFP	486.49	41	1311.01	9217.4	186.468	wt
G33T:A696T	V14L:M240L	amacGFP	2129.86	120	1291.65	9428	176.959	V11L:M232L
C224T:G548T:C572T	Q186H	amacGFP	60.06	10	607.106	2228.67	165.38	Q182H
C119A	wt	amacGFP	861.15	57	1387.96	9386.76	205.23	wt
C110G	wt	amacGFP	250.33	13	1126.94	10325.5	122.995	wt
A430G	N147S	amacGFP	680.22	48	1403.39	10129.9	194.426	N143S
G33T:A127G:A696T	V14L:E45G:M240L	amacGFP	136.6	10	1262.6	8822.83	180.686	V11L:E42G:M232L
G33T:T657C	V14L:F227L	amacGFP	897.5	62	1426.83	10823	188.103	V11L:F219L
G53A:C179T	wt	amacGFP	71.87	6	1456.3	10082.4	210.347	wt
G33T:C389T:A591G	V14L:N204D	amacGFP	105.37	6	1514.6	9397.63	244.106	V11L:N197D
G33T:G563T	V14L:L191F	amacGFP	501.09	42	1220.33	8033.62	185.372	V11L:L187F
G258A:A337G	A89T:K116R	amacGFP	53.34	2	309.6	8545.65	11.2165	A86T:K112R
A241G	N83S	amacGFP	1526.52	135	1229.55	9091.37	166.288	N80S
T556C:A603T	V189A:S208C	amacGFP	35.23	2	911.973	9651.68	86.1711	V185A:S201C
G513A:T669C:G681T	E175K:F231L:G235W	amacGFP	30.75	3	1282.67	6250.57	263.214	E171K:F223L:G227W
C173T:A316T:A331T	Y109F:E114V	amacGFP	96.09	7	893.92	8394.39	95.1937	Y105F:E110V
G33T:T632C	V14L	amacGFP	592.79	56	1405.54	8860.95	222.948	V11L
G33T:G346T	V14L:G119V	amacGFP	308.19	29	815.646	7400.75	89.8933	V11L:G115V
G122A	wt	amacGFP	466.55	32	1521.22	9515.28	243.198	wt
G33T:C431T	V14L	amacGFP	303.75	26	1159.21	8693.78	154.566	V11L
A3T:G128T:G281A:T706C	S1C:E45D:L243P	amacGFP	75.35	6	521.971	8242.6	33.0543	S1C:E42D:L235P
G33T:T294A	V14L:F102I	amacGFP	463.67	35	1103.44	9603.15	126.789	V11L:F98I
G88A:A100G:C518A	R32H:E36G	amacGFP	124.03	6	1000.06	9075.25	110.204	R29H:E33G
A268T	E93V	amacGFP	2208.14	140	1313.95	9751.04	177.054	E89V
A456T:G502A:C690A	M156L:R171H:H238N	amacGFP	45	4	537.857	7148.23	40.4702	M152L:R167H:H230N
G20T:G413A:G665A	wt	amacGFP	31.16	2	131.389	7851.34	2.19873	wt
A49T:A227G:A353G:T661A	E19V:L228Q	amacGFP	75.01	5	449.514	7602.63	26.578	E16V:L220Q
A391G:A429T	K134R:N147Y	amacGFP	72	4	1196.12	10493.3	136.344	K130R:N143Y
G513A:A610T	E175K:Q210L	amacGFP	44.04	6	842.997	7895.2	90.0097	E171K:Q203L
T21C:G33T	F10L:V14L	amacGFP	1240.19	109	907.007	7311.77	112.512	F7L:V11L
G33T:C177A:G364A:C533T:C596T:G693A	V14L:L62I:R125H:G239S	amacGFP	31.9	5	888.502	6955.54	113.497	V11L:L59I:R121H:G231S
A106T	D38V	amacGFP	756.89	59	1016.59	8564.31	120.67	D35V
T387C:T557G	F133L	amacGFP	50.4	5	415.134	8914.51	19.3321	F129L
A466G:A514T:G537T	K159R:E175V:D183Y	amacGFP	37.42	5	1363.59	11179	166.329	K155R:E171V:D179Y
G33T:T277A	V14L:I96N	amacGFP	167.37	17	544.876	7274.53	40.8122	V11L:I92N
G206A:A375G:C584T:C690A	K129E:H238N	amacGFP	117.57	4	151.952	8398.86	2.7491	K125E:H230N
T157C:T294C:G502T:C539A:C690A	L55P:F102L:R171L:D183E:H238N	amacGFP	46.63	4	466.425	5376.6	40.4628	L52P:F98L:R167L:D179E:H230N
G111A:A174G:A471G	D40N:T61A:N161D	amacGFP	29.25	2	765.377	2633.85	222.413	D37N:T58A:N157D
A349G	D120G	amacGFP	385.12	39	1410.26	9318.84	213.421	D116G
A312G:C690A	K108E:H238N	amacGFP	140.66	14	1212.92	8435.65	174.401	K104E:H230N
G29T:G33T:C188A:A390C:C560A	V14L:K134Q	amacGFP	108.58	7	1355.72	8748.67	210.087	V11L:K130Q
A337G:G571T:A703T	K116R:G194V:E242V	amacGFP	45.54	4	677.132	7867.86	58.2761	K112R:G190V:E234V
A129G:A390G:A538T:A603T	I46V:K134E:D183V:S208C	amacGFP	31.2	4	1389.09	7604.94	253.726	I43V:K130E:D179V:S201C
G33T:A73T:G233A	V14L:H27L:M80I	amacGFP	83.65	5	759.668	7367.05	78.3346	V11L:H24L:M77I
G33T:T493C	V14L:F168S	amacGFP	587.39	62	230.497	490.445	108.328	V11L:F164S
T203A:A430G:A582T	N147S:I198F	amacGFP	185.08	9	732.778	8690.69	61.7861	N143S:I194F
A634T	N218I	amacGFP	1659.58	128	1235.36	9021.79	169.16	N211I
G33T:C92T:T141A:A174T:A313C	V14L:C50S:T61S:K108T	amacGFP	57.32	8	1130.58	6897.49	185.316	V11L:C47S:T58S:K104T
G33T:C308T:T340A:C569T:A588G:C620A	V14L:F117Y:I203V	amacGFP	100.12	8	1574.47	7738.62	320.334	V11L:F113Y:I196V
G33T:C500A:C512A	V14L	amacGFP	92.51	9	1330.34	9469.25	186.901	V11L
A81G:A112C:T202A:G410T:C441A:A505T	S30G:D40A:I70N:H151N:H172L	amacGFP	83.06	5	400.967	1874.88	85.7522	S27G:D37A:I67N:H147N:H168L
G33T:G128A:G662T	V14L	amacGFP	55.44	12	1762.61	7625.09	407.443	V11L
G410A	wt	amacGFP	666.83	58	1527.45	8839.62	263.938	wt
A445T:A507T	N152I:N173Y	amacGFP	105.71	7	844.772	9472.55	75.3376	N148I:N169Y
G33T:G477T:G571A	V14L:G163C:G194D	amacGFP	35.31	2	673.424	6853.6	66.1697	V11L:G159C:G190D
G33T:T448C	V14L:V153A	amacGFP	623.34	59	900.304	6633.59	122.188	V11L:V149A
G33T:C173T:T457A:G524A	V14L:M156K	amacGFP	83.95	4	525.854	8590.6	32.189	V11L:M152K
C146G	wt	amacGFP	49.24	5	1209.45	8999.76	162.533	wt
C113T:C156T:C572G:A685G	H236R	amacGFP	30.88	2	658.41	9862.26	43.9559	H228R
A13T	E7V	amacGFP	1013.06	100	1357.01	9301.36	197.978	E4V
C352T:G462T	T121I:D158Y	amacGFP	27.58	2	229.246	6979.92	7.52927	T117I:D154Y
A508T:A612T	N173I:T211S	amacGFP	61.57	12	1076.93	5964.25	194.455	N169I:T204S
G39A:T114C:T135A:A307G:T457C	V16I:Y41H:F48I:D106G:M156T	amacGFP	33.68	4	443.501	955.741	205.802	V13I:Y38H:F45I:D102G:M152T
G8A:G27T:C600T	G12W	amacGFP	42.87	4	1603.97	6719.71	382.864	G9W
G357A	V123M	amacGFP	525.69	32	1338.34	8799.09	203.56	V119M
A81T	S30C	amacGFP	918.57	62	1321.52	9361.89	186.544	S27C
G33T:C119T:A313G	V14L:K108R	amacGFP	73.46	5	686.242	8385.54	56.1594	V11L:K104R
T204A	L71M	amacGFP	372.82	36	569.207	5020.14	64.5393	L68M
G33T:T195C:C503A	V14L:Y68H	amacGFP	67.51	2	0	449	0	V11L:Y65H
A370G	E127G	amacGFP	666.49	43	1067.09	9584.68	118.801	E123G
G33T:T526C:A582T	V14L:V179A:I198F	amacGFP	40.64	8	965.937	5568.54	167.555	V11L:V175A:I194F
T652C	M225T	amacGFP	898.87	130	937.674	3075.6	285.873	M217T
G33T:A313T	V14L:K108M	amacGFP	714.01	64	1106.12	8885.18	137.701	V11L:K104M
C275T	wt	amacGFP	270.62	23	1396.54	9389.4	207.715	wt
G33T:A283T:G578T	V14L:E98V	amacGFP	29.05	4	789.555	8043.25	77.5057	V11L:E94V
A6T:G33T:G384T:A402T:T426A:A514T	K2*:V14L:D132Y:N138Y:Y146N:E175V	amacGFP	47.18	2	0	449	0	K2*:V11L:D128Y:N134Y:Y142N:E171V
A237G:C605T	M82V	amacGFP	32.31	5	714.158	10298	49.5262	M79V
G33T:A65T:A288G:G377T:G527A	V14L:T100A:K129N	amacGFP	33.75	3	1151.04	7881.48	168.102	V11L:T96A:K125N
A349C	D120A	amacGFP	361.08	28	1321.49	10109.2	172.747	D116A
C354T:G383A:C518T:G551A	M131I	amacGFP	42.37	6	723.44	8657.87	60.4496	M127I
C189A:G281A:A337G:G378T:C572T:G615A	L66M:K116R:G130C:A212T	amacGFP	31.45	7	540.068	5187.96	56.2212	L63M:K112R:G126C:A205T
T556C	V189A	amacGFP	1793	149	1405.68	9294.3	212.597	V185A
G53.:.56G:C368A:T670A	D21S:F231Y	amacGFP	32.96	4	170.018	949.331	30.4489	D18S:F223Y
G9T:A391T	G6C:K134M	amacGFP	98.3	5	542.064	8575.47	34.2644	G3C:K130M
G27A:G33T:A226T:T686C:G694C	G12R:V14L:E78V:G239A	amacGFP	99.11	6	843.574	8037.54	88.5367	G9R:V11L:E75V:G231A
G33T:G570T	V14L:G194C	amacGFP	652.29	54	1104.71	8608.32	141.769	V11L:G190C
A24G:G33T:A112T:C401G:G702C	T11A:V14L:D40V:E242Q	amacGFP	103.62	3	1570.01	11843.4	208.127	T8A:V11L:D37V:E234Q
A81T:G425A:G581A	S30C	amacGFP	35.8	4	1796.56	9444.24	341.755	S27C
C38A:A235G:T255A:C690G	K81R:S88T:H238D	amacGFP	52.48	6	799.643	7525.42	84.9693	K78R:S85T:H230D
T714G	*246G	amacGFP	1503.44	130	1316.23	9380.66	184.684	*238G
G33T:G162T:T632A:G662T	V14L:V57L	amacGFP	47.58	5	1672.95	7208.41	388.262	V11L:V54L
G27A	G12R	amacGFP	572.81	42	1095.38	8918.77	134.533	G9R
G39A:C185G:A456G	V16I:M156V	amacGFP	37.18	2	148.457	8474.59	2.60064	V13I:M152V
A127T:A235T	E45V:K81M	amacGFP	36.58	4	2047.51	8000.72	523.99	E42V:K78M
G33T:G643A	V14L:R222H	amacGFP	553.51	42	1590.48	9080.73	278.572	V11L:R214H
C167A	wt	amacGFP	599.39	46	1272.13	9611.77	168.368	wt
G33T:G502A	V14L:R171H	amacGFP	760.83	62	990.912	6595.38	148.878	V11L:R167H
A229G:C455A:A538G:A544T:A696G	H79R:D183G:Y185F:M240V	amacGFP	42.03	6	1333.19	9484.87	187.391	H76R:D179G:Y181F:M232V
C587G	wt	amacGFP	86.28	8	912.616	9297.09	89.5836	wt
G33T:A235T:A691T	V14L:K81M:H238L	amacGFP	54.42	6	1862.39	9054.12	383.087	V11L:K78M:H230L
G14T:G485T	E7D:K165N	amacGFP	77.29	6	814.792	8410.24	78.9378	E4D:K161N
G33T:A444G:T450A:C512A:C536A	V14L:N152D:Y154N	amacGFP	55.01	3	204.861	7732.22	5.42771	V11L:N148D:Y150N
C593G	N204K	amacGFP	71.96	8	1173.52	9040.1	152.338	N197K
G33T:C42G:C161A:G215A:C266A:A430T:T659C:T674A:G694A	V14L:L17V:N147I:S232R:G239D	amacGFP	61.47	6	757.902	8982.62	63.9474	V11L:L14V:N143I:S224R:G231D
G33T:G258A:T689C	V14L:A89T	amacGFP	93.1	4	737.974	7931.77	68.6613	V11L:A86T
C293A	wt	amacGFP	441.47	19	1217.68	10309.5	143.824	wt
C59A:G578T	wt	amacGFP	62.36	9	743.841	9660.88	57.2721	wt
G33T:G39A:G93A	V14L:V16I:E34K	amacGFP	153.36	13	794.68	7700.29	82.0121	V11L:V13I:E31K
A3G:C71T:C74T:A106G:C311T:C341T:C560T:T657A	S1G:D38G:F227I	amacGFP	51.05	4	437.816	8014.72	23.9164	S1G:D35G:F219I
G108T:G344T	A39S:E118D	amacGFP	52.18	4	634.214	8304.64	48.4341	A36S:E114D
A337G:A614G	K116R	amacGFP	46.39	8	1698.78	10233	282.014	K112R
G33T:C437T:G458A:C521T:T674G	V14L:M156I:S232R	amacGFP	35.56	4	801.288	10157.8	63.2089	V11L:M152I:S224R
T192A:T557A	S67T	amacGFP	86.99	7	981.778	5958.85	161.757	S64T
G33T:A81G:C407T	V14L:S30G	amacGFP	77.47	6	646.759	8344.21	50.1303	V11L:S27G
A61T:T295A:G335T	D23V:F102Y	amacGFP	34.42	4	1626.57	7570.59	349.473	D20V:F98Y
T47G	I18M	amacGFP	106.53	13	875.777	5630.54	136.219	I15M
G33T:C98A:G99A	V14L:E36K	amacGFP	53.95	7	981.01	8348.1	115.281	V11L:E33K
G515T	E175D	amacGFP	890.78	56	1267.56	9312.57	172.532	E171D
A687G	T237A	amacGFP	624.11	50	1297.21	9199.49	182.918	T229A
G33T:C644A	V14L	amacGFP	162.64	12	1979.96	8577.81	457.023	V11L
G33T:G576A	V14L:V196M	amacGFP	434.48	47	1050.73	7250.27	152.274	V11L:V192M
A174T:T421A:A495G	T61S:L144Q:K169E	amacGFP	27.91	2	225.929	7929.28	6.43742	T58S:L140Q:K165E
G33T:A444T	V14L:N152Y	amacGFP	458.07	48	1164.38	9653.37	140.447	V11L:N148Y
G33T:T678A	V14L:C234S	amacGFP	743.26	59	899.209	8243.13	98.0911	V11L:C226S
T249C	F86L	amacGFP	938.4	112	723.066	2918.34	179.151	F83L
A610G	Q210R	amacGFP	1002.2	70	1371.08	10654.1	176.446	Q203R
G33T:C224T:G410A	V14L	amacGFP	56.33	8	1275.88	7208.7	225.822	V11L
A196T:C218T:T657A	Y68F:F227I	amacGFP	41.76	2	59.8998	480.107	7.4733	Y65F:F219I
G33T:T250A:C341T:C469T:G571A	V14L:F86Y:A160V:G194D	amacGFP	28.93	2	190.782	5295.54	6.87326	V11L:F83Y:A156V:G190D
C26G	wt	amacGFP	92	4	1178.03	9314.54	148.987	wt
G33T:A466G	V14L:K159R	amacGFP	794.74	63	1172.65	9038.52	152.139	V11L:K155R
T19G:G33T	L9R:V14L	amacGFP	207.43	12	1337.65	9181.76	194.876	L6R:V11L
T262C:G578T:T708C:A709G	M90T:Y244R	amacGFP	39.14	6	233.659	2437.01	22.4032	M87T:Y236R
C26A:G33T	V14L	amacGFP	734.96	53	1211.82	9246.39	158.819	V11L
A73T:G447C:T452C:A618T	H27L:V153L:I213F	amacGFP	34.22	7	1100.08	2909.25	415.979	H24L:V149L:I206F
A174G	T61A	amacGFP	1017.86	75	693.971	4554.76	105.734	T58A
G33T:G693T	V14L:G239C	amacGFP	599.93	50	1203.27	8562.34	169.097	V11L:G231C
A628G	D216G	amacGFP	387.6	49	1447.26	8030.98	260.81	D209G
T203G	I70M	amacGFP	51.37	6	492.362	7536.8	32.1648	I67M
T387C	F133L	amacGFP	2164.75	126	1169.21	9503.96	143.841	F129L
A6G:C66T:A319T:C479A:T562C	K2E:H25Y:K110M:L191S	amacGFP	29.74	2	1177.38	7474.96	185.449	K2E:H22Y:K106M:L187S
A451G	Y154C	amacGFP	272.36	29	1139.06	8000.56	162.171	Y150C
C171A:A186T:A241G:A475G:A592G:G615T	P60T:T65S:N83S:N162S:N204S:A212S	amacGFP	72.56	8	758.779	5113.22	112.599	P57T:T62S:N80S:N158S:N197S:A205S
C176T:A274G:C584A	Y95C	amacGFP	65.71	11	65.812	490.12	8.83706	Y91C
A313G:G570A:A588G	K108R:G194S:I203V	amacGFP	56.91	4	917.444	8678.15	96.991	K104R:G190S:I196V
G33T:C83T:C92T:A475G:T647G	V14L:N162S:D223E	amacGFP	29	5	1208.57	7860.54	185.82	V11L:N158S:D215E
G33T:C613T	V14L:T211I	amacGFP	224.38	15	219.05	518.172	92.6005	V11L:T204I
G20A:G151A	G53D	amacGFP	68.14	6	613.491	8231.44	45.7237	G50D
G27C:G243A:C644A	G12R:D84N	amacGFP	80.29	6	463.701	4855.33	44.285	G9R:D81N
G33T:A709G	V14L:Y244C	amacGFP	402.28	38	1411.56	9093.63	219.111	V11L:Y236C
T232A:T250C:G369C:G537T:T562G	M80K:F86S:E127Q:D183Y:L191W	amacGFP	29.52	6	106.266	534.845	21.1136	M77K:F83S:E123Q:D179Y:L187W
T202A:T556C	I70N:V189A	amacGFP	33.4	5	279.286	611.069	127.646	I67N:V185A
C92T:T454C:T706C	I155T:L243P	amacGFP	29.33	3	324.098	1983.96	52.9443	I151T:L235P
G33T:C152T	V14L	amacGFP	305.44	30	1268.87	9199.03	175.022	V11L
G33T:T157C:G344A:G485A:T657C	V14L:L55P:F227L	amacGFP	31.08	2	3.8125	7935.05	0.00183176	V11L:L52P:F219L
C89G:C116T:A360G:A598G	N124D:Y206C	amacGFP	57.27	5	532.77	569.457	498.446	N120D:Y199C
G681A	G235R	amacGFP	677.16	51	1359.94	9013.5	205.184	G227R
T181C:T674C	V63A	amacGFP	30.96	2	192.269	2311.06	15.9958	V60A
G33T:C59A:A61G:A100G:C149T:A276G:C279T:A313G:A394T:T448A	V14L:D23G:E36G:I96V:Q97*:K108R:E135V:V153D	amacGFP	29.4	5	1649.29	6296.97	431.979	V11L:D20G:E33G:I92V:Q93*:K104R:E131V:V149D
C414T:C690A	H142Y:H238N	amacGFP	162.98	12	749.615	9199.72	61.0804	H138Y:H230N
A30G:G33T:C137T:C242T:T556C	I13V:V14L:V189A	amacGFP	31.49	2	1103.12	8887.54	136.92	I10V:V11L:V185A
G20T:A100G:T511C	E36G:I174T	amacGFP	35.53	2	399.901	8048.52	19.8696	E33G:I170T
A81G:A553T	S30G:N188I	amacGFP	110.27	13	68.8244	473.486	10.0041	S27G:N184I
A598T	Y206F	amacGFP	795.19	64	1427.63	9473.38	215.144	Y199F
G33T:A154T	V14L:K54M	amacGFP	1144.79	67	1156.73	8717.35	153.489	V11L:K51M
G4A	S1N	amacGFP	1476.03	91	1199.06	9222.15	155.902	S1N
A13G	E7G	amacGFP	849.97	69	1207.1	9377.34	155.384	E4G
A429T:T674A	N147Y:S232R	amacGFP	45.01	4	786.314	11884	52.0269	N143Y:S224R
A115T:G281T	Y41F:Q97H	amacGFP	27.33	3	0	449	0	Y38F:Q93H
C230G:A240C:A472G:A614T	H79Q:N83H:N161S	amacGFP	139.12	11	1224.93	9196.82	163.148	H76Q:N80H:N157S
G33T:T114C:C616G	V14L:Y41H:A212G	amacGFP	36.03	7	1299.23	9292.1	181.66	V11L:Y38H:A205G
C148A:C256A:C531T	T52N:S88Y:L181F	amacGFP	102.08	10	1205.96	8876.02	163.85	T49N:S85Y:L177F
G33T:T78C:T714G	V14L:F29L:*246G	amacGFP	28.41	5	1087.9	5422.97	218.244	V11L:F26L:*238G
G33T:T526C	V14L:V179A	amacGFP	959.75	52	878.369	6712.3	114.943	V11L:V175A
A153G:A489T:C609A:A639T	K54E:N167Y:Q210K:T221S	amacGFP	41.04	3	713.266	11096.3	45.8485	K51E:N163Y:Q203K:T213S
A133T:A385G:C416T	K47M:D132G	amacGFP	43.18	4	625.165	6231.79	62.7157	K44M:D128G
G33T:T203C:C368T:T473.:.475T:C690A	V14L:N161K:N162Y:H238N	amacGFP	65.31	5	832.599	8227.6	84.2555	V11L:N157K:N158Y:H230N
T580C	L197P	amacGFP	1154.77	131	1323.22	7885.22	222.051	L193P
C401T:C503T:G530A:G565C	G192A	amacGFP	109	6	1113.85	9056.44	136.992	G188A
C257A:A461T	wt	amacGFP	142.94	5	585.782	9790.9	35.0469	wt
C311T:T457A:G631A	M156K:R217H	amacGFP	40.1	5	972.462	9321.61	101.451	M152K:R210H
C209T:C368T:C690A	H238N	amacGFP	67.78	3	631.169	10013.5	39.7836	H230N
A3T:C38T:G565A:G576C	S1C:G192D:V196L	amacGFP	28.88	4	191.463	7228.62	5.07124	S1C:G188D:V192L
C692T	wt	amacGFP	871.95	52	1491.63	9938.98	223.861	wt
G33T:C569T	V14L	amacGFP	607.63	57	1281.42	9260.9	177.309	V11L
G33T:A67G:A353T:C443T:G513C	V14L:H25R:E175Q	amacGFP	173.96	8	333.29	7699.72	14.4268	V11L:H22R:E171Q
G33T:A321T	V14L:T111S	amacGFP	624.34	34	501.562	4855.02	51.8154	V11L:T107S
C42A:A49G:A376G:G564A	L17M:E19G:K129R:G192S	amacGFP	35.44	4	833.906	7179.05	96.8651	L14M:E16G:K125R:G188S
C446T:G522T:T577C:A691T	G178W:V196A:H238L	amacGFP	37.03	6	952.718	8381.46	108.295	G174W:V192A:H230L
G33T:G206A:A415T	V14L:H142L	amacGFP	66.96	2	602.786	8297.78	43.789	V11L:H138L
A24G:C59T:C299G:A337G:G411C:C590A	T11A:F103L:K116R:G141R	amacGFP	75.87	8	65.4251	497.217	8.60879	T8A:F99L:K112R:G137R
G33T:C72G:A226G	V14L:H27D:E78G	amacGFP	53.34	5	281.319	8028.98	9.85687	V11L:H24D:E75G
T47C:C347A:A610G	Q210R	amacGFP	61.85	8	973.802	10265.4	92.3778	Q203R
T195A:C501A:C559T	Y68N:R171S:P190L	amacGFP	34.23	5	57.4064	476.767	6.91217	Y65N:R167S:P186L
G33T:G615A	V14L:A212T	amacGFP	564	46	1344.05	9861.52	183.183	V11L:A205T
G33T:T294A:G631A	V14L:F102I:R217H	amacGFP	130.15	4	752.338	10125.1	55.9021	V11L:F98I:R210H
G548T	Q186H	amacGFP	137.55	22	928.35	1784.6	482.927	Q182H
G33T:A394G	V14L:E135G	amacGFP	475.46	33	1367.69	8351.64	223.976	V11L:E131G
T203A:A514T	E175V	amacGFP	157.79	4	750.757	9595.2	58.7415	E171V
G10A:G33T:A438G	G6D:V14L:S150G	amacGFP	36.69	2	43.5223	4664.19	0.406113	G3D:V11L:S146G
T577A	V196E	amacGFP	1120.04	119	737.253	4702.41	115.588	V192E
G33T:C59A:C110T:C177A:C449T:G565A	V14L:L62I:G192D	amacGFP	40.91	4	726.694	8062.49	65.4989	V11L:L59I:G188D
C156T:A376T	K129M	amacGFP	103.11	9	756.473	8197.84	69.8051	K125M
A496T	K169M	amacGFP	811.84	63	1101.79	8967.67	135.368	K165M
G33T:A316T:A451G	V14L:Y109F:Y154C	amacGFP	84.87	7	577.227	8125.65	41.0048	V11L:Y105F:Y150C
G14.:G33T:C152.:A201T:G217A:C223A:A376G:A397G:T409C:A442G	E8S:L9C:F10S:T11P:I13S:V14C:V16S:L17*:I18L:E19S:L20W:D21T:G22A:D23T:V24Y:H25T:G26A:H27T:K28S:F29S:S30A:V31C:R32A:G33A:E34R:G35A:E36R:G37A:D38M:A39P:D40T:Y41T:G42A:K43S:L44W:E45R:I46S:K47S:F48S:I49S:C50A:T51P:T52P:G53E:K54A:L55A:P56R:V57A:P58L:W59A:P60H:T61P:L62R:V63D:T64H:T65P:L66V:S67V:Y68R:G69L:I70F:L71V:C72L:F73R:R75L:Y76P:P77R:E78T:M80E:K81D:M82E:N83R:D84L:F85L:F86Q:K87V:S88R:A89H:M90A:P92R:E…	amacGFP	26.11	2	72.4333	511.484	10.2576	E5S:L6C:F7S:T8P:I10S:V11C:V13S:L14*:I15L:E16S:L17W:D18T:G19A:D20T:V21Y:H22T:G23A:H24T:K25S:F26S:S27A:V28C:R29A:G30A:E31R:G32A:E33R:G34A:D35M:A36P:D37T:Y38T:G39A:K40S:L41W:E42R:I43S:K44S:F45S:I46S:C47A:T48P:T49P:G50E:K51A:L52A:P53R:V54A:P55L:W56A:P57H:T58P:L59R:V60D:T61H:T62P:L63V:S64V:Y65R:G66L:I67F:L68V:C69L:F70R:R72L:Y73P:P74R:E75T:M77E:K78D:M79E:N80R:D81L:F82L:F83Q:K84V:S85R:A86H:M87A:P88R:E89…
G33T:T78A	V14L:F29I	amacGFP	130.34	24	1229.09	6302.56	239.691	V11L:F26I
A30T:G33T	I13F:V14L	amacGFP	1290.02	97	894.563	8060.39	99.2811	I10F:V11L
A133G:T205C:C401T:T452C:G502A:A568G:T647C	K47R:L71S:R171H:D193G	amacGFP	33.35	4	262.655	1047.84	65.8378	K44R:L68S:R167H:D189G
A418C:A529G	K143T:Q180R	amacGFP	249.77	22	1007.68	4782.62	212.313	K139T:Q176R
G33T:G60A:A201T	V14L:D23N:I70F	amacGFP	75.44	6	302.277	1495.86	61.0827	V11L:D20N:I67F
G682T	G235V	amacGFP	1658.5	119	1329.69	9150.84	193.214	G227V
A405G	I139V	amacGFP	483.87	38	1069.39	9495.61	120.435	I135V
C420T:T680A	C234*	amacGFP	64.09	6	829.082	6483.64	106.017	C226*
C92T:A133G:G534A	K47R:A182T	amacGFP	38.79	6	1466.64	4772.72	450.695	K44R:A178T
A147G	T52A	amacGFP	1174.06	89	1261.95	9111.74	174.777	T49A
A490G:T647C	N167S	amacGFP	101.62	4	804.168	9650.7	67.0092	N163S
A231T:T532C	M80L:L181P	amacGFP	41.45	2	1199.64	8413.28	171.054	M77L:L177P
C308T:C593T	wt	amacGFP	35.11	7	1595.58	9434.79	269.84	wt
G33T:A133T:C317T:A598T	V14L:K47M:Y206F	amacGFP	28.5	4	1395.08	8042.9	241.983	V11L:K44M:Y199F
G33T:C68T:A438G	V14L:S150G	amacGFP	205.53	7	433.816	7538.98	24.9631	V11L:S146G
A138G	I49V	amacGFP	533.34	57	1775.4	10262.8	307.131	I46V
G33T:G342A:A415G:C536A:A700G	V14L:E118K:H142R:D241G	amacGFP	53.02	4	376.993	8428.92	16.8615	V11L:E114K:H138R:D233G
G33T:A614T	V14L	amacGFP	594.37	48	1533.4	9446.11	248.918	V11L
G422A	wt	amacGFP	483.86	35	1418.44	9455.92	212.775	wt
G33T:T561C:G567T	V14L:D193Y	amacGFP	131.45	7	663.856	8958.7	49.1929	V11L:D189Y
A598G	Y206C	amacGFP	538	46	1145.42	8900.86	147.4	Y199C
T34A:A353G	V14E	amacGFP	32.92	8	495.311	6763.78	36.2716	V11E
G369A:A456G	E127K:M156V	amacGFP	49.33	4	916.375	10018.1	83.8226	E123K:M152V
G33T:C68T:G314C:T532A	V14L:K108N:L181H	amacGFP	192.17	11	1248.53	9597.89	162.414	V11L:K104N:L177H
C26T:C110T:C146A:T388A:T487C	F133Y:V166A	amacGFP	33.15	4	927.446	8892.5	96.7283	F129Y:V162A
G33T:T557C	V14L	amacGFP	1251.51	98	1300.93	9108.28	185.811	V11L
C11T:A711G	K245E	amacGFP	67.41	6	1614.11	8321.96	313.071	K237E
C23.:T78A:C173T:A445G:A456G:C584.	F10L:T11P:I13S:V14C:V16S:L17*:I18L:E19S:L20W:D21T:G22A:D23T:V24Y:H25T:G26A:H27T:K28R:F29S:S30A:V31C:R32A:G33A:E34R:G35A:E36R:G37A:D38M:A39P:D40T:Y41T:G42A:K43S:L44W:E45R:I46S:K47S:F48S:I49S:C50A:T51P:T52P:G53A:K54S:L55C:V57C:W59G:P60L:T61P:L62S:V63*:T64P:T65P:L66C:S67R:Y68T:G69A:I70F:L71C:C72A:F73S:A74R:R75A:Y76T:E78N:H79T:M80*:K81R:M82*:N83T:D84T:F85S:F86S:K87S:S88P:A89P:M90C:E93K:G94A:Y95T:I96S…	amacGFP	29.73	6	51.3117	469.985	5.60207	F7L:T8P:I10S:V11C:V13S:L14*:I15L:E16S:L17W:D18T:G19A:D20T:V21Y:H22T:G23A:H24T:K25R:F26S:S27A:V28C:R29A:G30A:E31R:G32A:E33R:G34A:D35M:A36P:D37T:Y38T:G39A:K40S:L41W:E42R:I43S:K44S:F45S:I46S:C47A:T48P:T49P:G50A:K51S:L52C:V54C:W56G:P57L:T58P:L59S:V60*:T61P:T62P:L63C:S64R:Y65T:G66A:I67F:L68C:C69A:F70S:A71R:R72A:Y73T:E75N:H76T:M77*:K78R:M79*:N80T:D81T:F82S:F83S:K84S:S85P:A86P:M87C:E89K:G90A:Y91T:I92S:Q…
G567T:A634T:A691G	D193Y:N218I:H238R	amacGFP	54.17	9	1108.21	7810.5	157.242	D189Y:N211I:H230R
A394T	E135V	amacGFP	739.35	51	1271.36	9057.88	178.448	E131V
A229G:A471G:C677A	H79R:N161D	amacGFP	27.08	2	297.309	7424.9	11.9049	H76R:N157D
G33T:G477C	V14L:G163R	amacGFP	90.14	10	1393.76	8617.11	225.431	V11L:G159R
G33T:A147T	V14L:T52S	amacGFP	888.63	70	1246.2	9101.63	170.629	V11L:T49S
C676G	A233G	amacGFP	209.59	16	674.019	6979.06	65.0949	A225G
T157C:G215A	L55P	amacGFP	66.82	6	922.508	8408.44	101.21	L52P
G33T:A405G:T470C	V14L:I139V	amacGFP	31.98	2	101.275	9834.22	1.04294	V11L:I135V
G33T:C146A:G523T	V14L:G178V	amacGFP	84.33	6	697.744	10000.9	48.6804	V11L:G174V
G33T:G675C	V14L:A233P	amacGFP	75.14	11	423.277	1881.39	95.2293	V11L:A225P
T470C:G581T	wt	amacGFP	76.25	7	732.535	9248.38	58.0219	wt
G14.:T34A:G155T:T262C:G645A	E8S:L9C:F10S:T11P:I13S:V14S:V16S:L17*:I18L:E19S:L20W:D21T:G22A:D23T:V24Y:H25T:G26A:H27T:K28S:F29S:S30A:V31C:R32A:G33A:E34R:G35A:E36R:G37A:D38M:A39P:D40T:Y41T:G42A:K43S:L44W:E45R:I46S:K47S:F48S:I49S:C50A:T51P:T52P:G53A:K54I:L55C:V57C:W59G:T61P:L62S:V63*:T64P:T65P:L66C:S67R:Y68T:G69A:I70F:L71C:C72A:F73S:A74R:R75A:Y76T:E78N:H79T:M80*:K81R:M82*:N83T:D84T:F85S:F86S:K87S:S88P:A89P:M90R:E93K:G94A:Y95T:I…	amacGFP	116.28	4	0	449	0	E5S:L6C:F7S:T8P:I10S:V11S:V13S:L14*:I15L:E16S:L17W:D18T:G19A:D20T:V21Y:H22T:G23A:H24T:K25S:F26S:S27A:V28C:R29A:G30A:E31R:G32A:E33R:G34A:D35M:A36P:D37T:Y38T:G39A:K40S:L41W:E42R:I43S:K44S:F45S:I46S:C47A:T48P:T49P:G50A:K51I:L52C:V54C:W56G:T58P:L59S:V60*:T61P:T62P:L63C:S64R:Y65T:G66A:I67F:L68C:C69A:F70S:A71R:R72A:Y73T:E75N:H76T:M77*:K78R:M79*:N80T:D81T:F82S:F83S:K84S:S85P:A86P:M87R:E89K:G90A:Y91T:I92…
G33T:C688T	V14L:T237I	amacGFP	214.58	17	1022.43	9109.91	114.749	V11L:T229I
T114G:T204A:C414T:G604A	Y41D:L71M:H142Y:S208N	amacGFP	140.3	13	583.409	3864.74	88.0696	Y38D:L68M:H138Y:S201N
A73G	H27R	amacGFP	684.09	60	1548.7	9016.35	266.012	H24R
T583A:A687G	I198N:T237A	amacGFP	101.78	10	1093.39	9165.94	130.43	I194N:T229A
C109T	A39V	amacGFP	374.85	32	875.083	8415.12	90.9993	A36V
C212A:C569G	F73L:D193E	amacGFP	117.09	9	1321.78	7438.77	234.866	F70L:D189E
G33T:C542A:T697C	V14L:H184Q:M240T	amacGFP	31.25	4	668.259	5743.98	77.7458	V11L:H180Q:M232T
C386A	D132E	amacGFP	166.92	13	1250.09	9447.69	165.408	D128E
A73T:A544C:T632A	H27L:Y185S	amacGFP	124.61	12	1771.27	9545.49	328.679	H24L:Y181S
T204C:A241G:C573A	N83S:P195T	amacGFP	92.53	8	1694.94	9268.01	309.972	N80S:P191T
C300A	Q104K	amacGFP	464.37	56	1093.26	8476.8	140.998	Q100K
A7T	K2M	amacGFP	860.84	63	1083.89	9047.51	129.849	K2M
G33T:A115T	V14L:Y41F	amacGFP	1050.77	74	854.427	8743.78	83.493	V11L:Y38F
C476G	N162K	amacGFP	43.75	4	998.22	9351.91	106.55	N158K
T19A:G33T	L9Q:V14L	amacGFP	442.48	36	896.381	7737.17	103.849	L6Q:V11L
T139C	I49T	amacGFP	391.16	34	1233.35	9021.58	168.612	I46T
G82A:T577C:A700T	S30N:V196A:D241V	amacGFP	68.5	8	1297.57	9051.16	186.02	S27N:V192A:D233V
C59T:T326C	wt	amacGFP	63.95	4	574.259	10979.3	30.0358	wt
G194A:A465G	K159E	amacGFP	62.77	5	797.53	8926.31	71.2561	K155E
G33T:T434C	V14L	amacGFP	619.01	45	1278.74	9289.3	176.027	V11L
G33T:A55T:A81G:A351T	V14L:D21V:S30G:T121S	amacGFP	99.07	8	968.133	7266.71	128.983	V11L:D18V:S27G:T117S
A3G:G33T:G88A:C92G:A508G	S1G:V14L:R32H:N173S	amacGFP	38.65	2	158.068	5145.5	4.85583	S1G:V11L:R29H:N169S
C184A:A376T:C500A	T64N:K129M	amacGFP	30.95	4	46.3806	465.561	4.62057	T61N:K125M
T340A:A390G:T470A:T657A:A687T	F117Y:K134E:F227I:T237S	amacGFP	50.72	2	676.498	11507.1	39.771	F113Y:K130E:F219I:T229S
C104T:A316G:C550T:C684T	Y109C:T187M:H236Y	amacGFP	30.43	2	388.116	2598.6	57.9675	Y105C:T183M:H228Y
G194A	wt	amacGFP	409.98	37	1281.17	9710.65	169.029	wt
C609A	Q210K	amacGFP	722.53	56	1541.28	10265.6	231.409	Q203K
G33T:G108C:C688T	V14L:A39P:T237I	amacGFP	51.07	9	1127.41	9675.41	131.369	V11L:A36P:T229I
G33T:A397G	V14L:D136G	amacGFP	1477.66	70	1174.26	8760.3	157.403	V11L:D132G
G33T:C372T:G523T	V14L:G178V	amacGFP	308.46	20	1483.61	9833.33	223.84	V11L:G174V
C149T	wt	amacGFP	1447.44	92	1167.91	9213.86	148.038	wt
C300A:T382C:C398T:C572T:G645C	Q104K:M131T:D223H	amacGFP	48.01	5	672.288	8095.33	55.8311	Q100K:M127T:D215H
A55T:C317T:G330C:T580G:A621T	D21V:E114Q:L197R:S214C	amacGFP	43.5	4	377.926	8739.84	16.3422	D18V:E110Q:L193R:S207C
C5A	S1R	amacGFP	495.9	33	1062.3	9451.6	119.395	S1R
G33T:G555T	V14L:V189F	amacGFP	120.46	16	1189.29	8747.66	161.69	V11L:V185F
G33T:A343G:A456G	V14L:E118G:M156V	amacGFP	27.83	3	1679.55	6484.4	435.028	V11L:E114G:M152V
G99A:A112G:T334C:C341T:A376G:G447A:G555A:T689C	E36K:D40G:V115A:K129R:V153I:V189I	amacGFP	36.74	6	48.6927	467.536	5.07123	E33K:D37G:V111A:K125R:V149I:V185I
C83A:G522T	S30R:G178W	amacGFP	59.78	6	1811.98	11523.4	284.92	S27R:G174W
A235T:C257G:G393A:C500T:C536T	K81M:E135K	amacGFP	77.92	3	610.83	8383.84	44.5039	K78M:E131K
A475T	N162I	amacGFP	1378.61	95	1506.1	9141.03	248.15	N158I
C148A:C257A:G654A:T661A	T52N:V226I:L228Q	amacGFP	88.7	8	505.534	8204.24	31.1503	T49N:V218I:L220Q
A196T:T262G:A442T:T457A:A553C:G638A	Y68F:M90R:H151L:M156K:N188T	amacGFP	46.55	4	176.212	554.075	56.0407	Y65F:M87R:H147L:M152K:N184T
G33T:A240T:C503A:A568T	V14L:N83Y:D193V	amacGFP	58.12	7	1113.66	9825.45	126.226	V11L:N80Y:D189V
T250A:C260T:A703T	F86Y:E242V	amacGFP	64.41	6	2045.18	9402.85	444.838	F83Y:E234V
A55T:C119T:C372T	D21V	amacGFP	139.19	4	832.836	8991.28	77.1432	D18V
G99A	E36K	amacGFP	1010.03	95	1487.59	9809.3	225.596	E33K
G33T:A129G:A591T	V14L:I46V:N204Y	amacGFP	31.52	6	1352	8387.93	217.92	V11L:I43V:N197Y
C119T:A592T:C629T	N204I	amacGFP	56.2	4	169.722	7959.18	3.61918	N197I
C573A	P195T	amacGFP	857.22	71	1519.41	9309.23	247.99	P191T
G86C:A337T:T583A	K116M:I198N	amacGFP	100.21	2	112.619	8749.36	1.44958	K112M:I194N
G33T:A483G:G527A:T706C	V14L:K165E:L243P	amacGFP	32.68	4	536.557	8554.13	33.6555	V11L:K161E:L235P
A3G:G33T:T661A	S1G:V14L:L228Q	amacGFP	31.15	4	903.699	7978.81	102.355	S1G:V11L:L220Q
C324A	R112S	amacGFP	401.38	40	1097.75	8300.16	145.184	R108S
G63A:C401T:T647C	V24I	amacGFP	32.02	4	1037.76	8424.36	127.837	V21I
A618G	I213V	amacGFP	599.32	64	2042.8	11344.9	367.832	I206V
A592T	N204I	amacGFP	1358.88	96	1085.65	8454.11	139.416	N197I
A3T:T387C:A391T:A709T	S1C:F133L:K134M:Y244F	amacGFP	43.85	4	730.095	9235.4	57.7169	S1C:F129L:K130M:Y236F
G12T:G33T:G134C	E7*:V14L:K47N	amacGFP	76.2	9	212.771	572.495	79.0773	E4*:V11L:K44N
C62T:C131A:A288G:A353C	T100A	amacGFP	51.12	2	415.059	9115.68	18.8987	T96A
G33T:A67T:C160T:A235G:A465G:T697C	V14L:H25L:P56L:K81R:K159E:M240T	amacGFP	30.09	5	878.432	6904.67	111.757	V11L:H22L:P53L:K78R:K155E:M232T
G33T:C272T:C629G	V14L:D216E	amacGFP	36.2	2	384.679	7974.64	18.5561	V11L:D209E
T34C	V14A	amacGFP	2039.31	143	1192.85	8585.36	165.734	V11A
C449A	wt	amacGFP	264.5	29	1013.14	9001.58	114.029	wt
G50A	wt	amacGFP	364.02	30	1029.64	9400.69	112.774	wt
A385T:G524T	D132V	amacGFP	107.25	5	943.282	8092.52	109.951	D128V
T499C:G698C	I170T:M240I	amacGFP	64.7	5	492.582	18164.1	13.3581	I166T:M232I
G35C:T181C:C257A:A445T:C617T	V63A:N152I	amacGFP	33.44	2	260.647	3042.47	22.3294	V60A:N148I
G33T:A312C:T487C:A628G	V14L:K108Q:V166A:D216G	amacGFP	29.34	2	584.275	9553.87	35.7318	V11L:K104Q:V162A:D209G
T34C:G458A:T697C	V14A:M156I:M240T	amacGFP	119.75	6	630.372	8058.9	49.3081	V11A:M152I:M232T
A475G	N162S	amacGFP	663.81	57	1240.36	9581.86	160.564	N158S
A463T	D158V	amacGFP	226.58	21	784.749	6737.83	91.3989	D154V
G99A:C575T	E36K	amacGFP	125.06	7	1069.6	10769.8	106.227	E33K
A73T:C109T:C140A	H27L:A39V	amacGFP	114.29	5	671.362	8764.25	51.4278	H24L:A36V
A234G:T450A	K81E:Y154N	amacGFP	37.37	10	1425.33	7812.32	260.048	K78E:Y150N
G33T:G213T:A403G:C650T:T697A	V14L:A74S:N138S:M240K	amacGFP	42.9	7	1030.2	7051.92	150.499	V11L:A71S:N134S:M232K
A24G:A154G:C521G:A538T:C690T	T11A:K54R:D183V:H238Y	amacGFP	28.69	5	718.951	8108.1	63.7498	T8A:K51R:D179V:H230Y
G665A	wt	amacGFP	496.3	31	1109.69	9234.59	133.349	wt
T262C:C449T:A639G:A703G	M90T:T221A:E242G	amacGFP	29.01	2	87.5974	2804.64	2.73592	M87T:T213A:E234G
G33T:G44A:G111A:G564T	V14L:D40N:G192C	amacGFP	51.93	5	951.459	9208.03	98.3134	V11L:D37N:G188C
G33T:A226T	V14L:E78V	amacGFP	443.28	49	1402.68	8827.57	222.884	V11L:E75V
G523T	G178V	amacGFP	1754.34	131	1297.49	11327.3	148.622	G174V
A61T:A147G:G527A:C575T:T641A	D23V:T52A	amacGFP	26.01	4	2020.53	9978.93	409.115	D20V:T49A
G128C:A610T	E45D:Q210L	amacGFP	65.54	6	1076.45	6978.36	166.049	E42D:Q203L
G33T:G537A	V14L:D183N	amacGFP	423.54	27	910.21	9133.77	90.7055	V11L:D179N
T294C:A691G	F102L:H238R	amacGFP	56.86	4	1390.31	9721.98	198.823	F98L:H230R
A6T:A132G:T205A:T262C:T450C:A490T:G524T	K2*:K47E:L71*:M90T:Y154H:N167I	amacGFP	142.93	8	139.53	513.767	37.8937	K2*:K44E:L68*:M87T:Y150H:N163I
A241T	N83I	amacGFP	1004.77	72	1057.32	8064.72	138.62	N80I
A430T:T708A	N147I:Y244N	amacGFP	56.12	2	421.569	7829.35	22.6993	N143I:Y236N
G33T:G206A:T210A:G258A:G348T:C386T:A510G:C644T	V14L:F73I:A89T:D120Y:I174V	amacGFP	61.65	8	649.35	7908.04	53.3198	V11L:F70I:A86T:D116Y:I170V
G225A:A253T:T294C:A313G:A385G:A588C	E78K:K87M:F102L:K108R:D132G:I203L	amacGFP	48.23	7	72.9751	493.774	10.785	E75K:K84M:F98L:K104R:D128G:I196L
G33T:C416T	V14L	amacGFP	534.08	48	1259.04	9253.05	171.313	V11L
T21C:A381G:T450C	F10L:M131V:Y154H	amacGFP	94.74	7	473.976	8324.41	26.9872	F7L:M127V:Y150H
G33T:A614G	V14L	amacGFP	439.97	39	1151.6	8722.45	152.042	V11L
T250A	F86Y	amacGFP	745.53	67	1208	8423.31	173.241	F83Y
G33T:G369A	V14L:E127K	amacGFP	535.9	33	1074.2	9560.67	120.694	V11L:E123K
G33T:C480T	V14L	amacGFP	340.79	28	1360.82	9349.12	198.075	V11L
T47C:A115T	Y41F	amacGFP	137.09	11	878.587	9060.88	85.192	Y38F
A6T:T31A:A183G:C401T:A489T:C594G:G694A	K2*:I13N:T64A:N167Y:H205D:G239D	amacGFP	128.85	9	240.454	552.709	104.608	K2*:I10N:T61A:N163Y:H198D:G231D
T452C	wt	amacGFP	1082.97	79	1360.11	9394.33	196.917	wt
T192A:G267A:G422T	S67T:E93K	amacGFP	93.3	2	225.682	4100.18	12.422	S64T:E89K
A505T	H172L	amacGFP	2690.99	112	1314.53	14912.5	115.874	H168L
G54A:T499C	D21N:I170T	amacGFP	119.24	6	1254.27	17435.7	90.2278	D18N:I166T
G369A:T457A:C459T	E127K:M156K:P157S	amacGFP	43.97	8	1471.54	8893.25	243.492	E123K:M152K:P153S
T64C	V24A	amacGFP	797.18	90	1271.41	7504.49	215.404	V21A
C172T	P60L	amacGFP	281.9	43	929.811	2106.41	410.437	P57L
A24G:G33T:A76G:T680A	T11A:V14L:K28R:C234*	amacGFP	94.21	4	251.024	5087.18	12.3867	T8A:V11L:K25R:C226*
G198A:C690A	G69S:H238N	amacGFP	42.31	4	5.68434e-14	449	7.19638e-30	G66S:H230N
G33T:T195C:C389A	V14L:Y68H:F133L	amacGFP	87.3	6	156.194	522.28	46.7116	V11L:Y65H:F129L
G33T:C690T	V14L:H238Y	amacGFP	481.93	41	1116.12	8846.18	140.82	V11L:H230Y
T22A:A147G:G258A:G329C	F10Y:T52A:A89T	amacGFP	72.87	8	998.89	8680.29	114.948	F7Y:T49A:A86T
A121T:C479A	K43M	amacGFP	121.33	9	589.062	7730.84	44.8844	K40M
T557C	wt	amacGFP	1729.01	145	1590.55	9465.48	267.272	wt
G33T:A174T:C443T:A610G:A687G	V14L:T61S:Q210R:T237A	amacGFP	181.82	16	1623.72	9942.15	265.182	V11L:T58S:Q203R:T229A
G33T:C251T:A351T:C500A	V14L:T121S	amacGFP	54.23	8	1212.68	8147.99	180.486	V11L:T117S
A349T:T358C	D120V:V123A	amacGFP	52.29	9	1266.99	7859.73	204.238	D116V:V119A
T46C:C296T:G374A:A541T	I18T:H184L	amacGFP	45.36	2	0	449	0	I15T:H180L
G33T:G95T:A331T	V14L:E34D:E114V	amacGFP	26.01	2	830.654	8615.79	80.0839	V11L:E31D:E110V
G33T:A361T:A489C	V14L:N124I:N167H	amacGFP	56.02	15	496.111	601.263	409.349	V11L:N120I:N163H
G33T:G151A:A319G	V14L:G53D:K110R	amacGFP	33.98	9	1237.66	7661.32	199.941	V11L:G50D:K106R
A618T	I213F	amacGFP	796.65	54	839.819	7145.37	98.7068	I206F
G33T:A618T	V14L:I213F	amacGFP	398.37	53	1982.36	8217.88	478.196	V11L:I206F
G33T:G95T	V14L:E34D	amacGFP	892.9	83	1350.12	8060.97	226.129	V11L:E31D
T22A:C59T:T473C	F10Y	amacGFP	107.53	7	738.756	6969.46	78.3075	F7Y
G33T:C677G	V14L	amacGFP	77.31	4	545.085	8537.2	34.8027	V11L
G33T:C152T:A319C	V14L:K110T	amacGFP	48.27	5	958.104	9233.26	99.4192	V11L:K106T
G15A:A55T:A144G:G502A	E8K:D21V:T51A:R171H	amacGFP	44.94	6	858.424	6683.7	110.252	E5K:D18V:T48A:R167H
C173G	wt	amacGFP	147.31	9	635.013	9317.19	43.2793	wt
G335T:C398A:C569A	D136E:D193E	amacGFP	133.13	6	695.5	9955.83	48.5867	D132E:D189E
A538G	D183G	amacGFP	1022.7	89	1314.03	9658.71	178.767	D179G
G82A:C257G:A463G:A588T:C677G	S30N:D158G:I203F	amacGFP	97.2	6	507.573	7863.35	32.7634	S27N:D154G:I196F
C189A:C287T:C535T	L66M:A182V	amacGFP	54.4	11	976.397	2483.18	383.924	L63M:A178V
G33T:A472G:T670C:G704A	V14L:N161S:F231S	amacGFP	49.03	5	220.12	1610.73	30.0814	V11L:N157S:F223S
G675A	A233T	amacGFP	482.5	48	1379.86	6474.2	294.094	A225T
A65G:G236A:G675A	A233T	amacGFP	55.7	7	1011.72	6421.14	159.407	A225T
A231T:G524T:G665A	M80L	amacGFP	76.7	2	615.989	8056.86	47.0956	M77L
G39A:G555A:C640T:A685G:G704A	V16I:V189I:T221I:H236R	amacGFP	104.48	8	591.691	9167.93	38.1873	V13I:V185I:T213I:H228R
G194A:A337T:A370G:A390G:A391T	K116M:E127G:K134V	amacGFP	121.34	10	559.381	7358.76	42.5217	K112M:E123G:K130V
C72A:C690A:T697A	H27N:H238N:M240K	amacGFP	164.26	7	989.322	10301.3	95.013	H24N:H230N:M232K
A235G:T526C:T678A:T689A:A696G	K81R:V179A:C234S:M240V	amacGFP	52.19	4	751.689	7392.09	76.4379	K78R:V175A:C226S:M232V
G33T:T667A:A703G	V14L:F230Y:E242G	amacGFP	63.71	6	545.535	7351.59	40.4821	V11L:F222Y:E234G
G33T:T204C:A538T	V14L:D183V	amacGFP	88.12	10	1003.92	8160.99	123.496	V11L:D179V
A138G:A514T:C688A:G704A	I49V:E175V:T237N	amacGFP	93.01	4	314.608	9923.23	9.9744	I46V:E171V:T229N
G33T:C83G	V14L:S30R	amacGFP	76.38	6	777.589	8679.84	69.6608	V11L:S27R
A351G:A483G:C690T	T121A:K165E:H238Y	amacGFP	65.44	4	853.327	8651.98	84.1619	T117A:K161E:H230Y
G33T:G571A	V14L:G194D	amacGFP	190.47	18	1328.07	9536.67	184.947	V11L:G190D
A67C:C688T	H25P:T237I	amacGFP	49.99	6	1006.67	7247.11	139.832	H22P:T229I
G4A:A115T	S1N:Y41F	amacGFP	92.61	2	311.669	9383.88	10.3515	S1N:Y38F
G8T:G33T:A186T:A436T	K2N:V14L:T65S:N149I	amacGFP	55.4	4	415.193	2595.4	66.4197	K2N:V11L:T62S:N145I
G33T:A301T:A466T	V14L:Q104L:K159M	amacGFP	116.97	6	863.534	8325.87	89.5631	V11L:Q100L:K155M
G33T:T583C:C650T:T674C	V14L:I198T	amacGFP	53.47	7	868.176	8895.19	84.7345	V11L:I194T
A132G:C459A:T647C	K47E:P157T	amacGFP	27.41	6	1193.11	6303.12	225.841	K44E:P153T
G33T:T139A	V14L:I49N	amacGFP	222.37	21	1120.05	8180.33	153.357	V11L:I46N
G33T:A456G	V14L:M156V	amacGFP	955.66	56	1235.46	9150.94	166.798	V11L:M152V
A241G:A591T:A687T	N83S:N204Y:T237S	amacGFP	36.11	6	1100.15	8807.19	137.425	N80S:N197Y:T229S
A127G:A436G:T457C:C560A	E45G:N149S:M156T	amacGFP	78.99	6	524.651	4453.94	61.8011	E42G:N145S:M152T
C173T:A186T:G393A:G665A	T65S:E135K	amacGFP	93.49	4	668.095	11478.9	38.8844	T62S:E131K
G33T:A196G:G364A	V14L:Y68C:R125H	amacGFP	27.59	5	642.377	902.411	457.273	V11L:Y65C:R121H
C72T:C149T:A687T	H27Y:T237S	amacGFP	127.33	13	1134.69	8167.04	157.649	H24Y:T229S
A65T:A349T	D120V	amacGFP	57.8	3	748.439	9286.36	60.3209	D116V
G33T:A424G:C533T	V14L:E145G	amacGFP	39.38	3	623.344	10576.9	36.7365	V11L:E141G
G194T	wt	amacGFP	158.64	21	2019.34	9467.79	430.697	wt
G33T:A484G:A553G	V14L:K165R:N188S	amacGFP	35.26	3	46.7043	1528.8	1.4268	V11L:K161R:N184S
G33T:G258A:C644T	V14L:A89T	amacGFP	31	2	383.507	9387.34	15.6676	V11L:A86T
C266T:C311T:A429T:A489T:G519T:T708C	N147Y:N167Y:G177C:Y244H	amacGFP	60.32	5	745.451	8897.07	62.4585	N143Y:N163Y:G173C:Y236H
A67T:T426C:A628T:G694A	H25L:Y146H:D216V:G239D	amacGFP	31.74	4	164.943	2618.13	10.3915	H22L:Y142H:D209V:G231D
G33T:T47A:A337G:C446A:A547T:C566T:T670A	V14L:K116R:N152K:Q186L:F231Y	amacGFP	28.2	6	180.651	570.808	57.173	V11L:K112R:N148K:Q182L:F223Y
A241G:A664G	N83S:E229G	amacGFP	69.07	6	20.8532	452.032	0.962	N80S:E221G
G33T:A337G:C640G:A685T	V14L:K116R:T221S:H236L	amacGFP	34.98	2	961.714	9177.75	100.776	V11L:K112R:T213S:H228L
C51A:A100T	L20M:E36V	amacGFP	30.8	5	1057.2	6849.9	163.165	L17M:E33V
G33T:A227G:A370G:A508T	V14L:E127G:N173I	amacGFP	67.05	12	1235.57	5445.56	280.344	V11L:E123G:N169I
C287A	wt	amacGFP	44.29	9	1245.73	8294.9	187.084	wt
G33T:T511C	V14L:I174T	amacGFP	597.49	61	1456.87	8619.48	246.242	V11L:I170T
G482T	wt	amacGFP	410.93	30	950.188	9338.55	96.6806	wt
G33T:T207A:A241G:C533T	V14L:C72S:N83S	amacGFP	39.43	2	390.317	2262.28	67.3423	V11L:C69S:N80S
C66T	H25Y	amacGFP	638.24	48	880.73	7854.36	98.7587	H22Y
G33T:A353T	V14L	amacGFP	978.74	57	1156.74	9096.27	147.099	V11L
G33T:C431A:G665T	V14L:N147K:E229D	amacGFP	31.31	8	474.041	642.408	349.801	V11L:N143K:E221D
G33T:A436G:A466T:G488A	V14L:N149S:K159M	amacGFP	32.37	4	572.826	4410.17	74.4029	V11L:N145S:K155M
G33T:G523C	V14L:G178A	amacGFP	643.06	32	1270.01	9948.02	162.136	V11L:G174A
G33T:A261T:C600A	V14L:M90L:L207M	amacGFP	81.5	7	421.715	3200.84	55.5616	V11L:M87L:L200M
A55G:A316T:A385G:G468A:T706A	D21G:Y109F:D132G:A160T:L243Q	amacGFP	48.52	2	38.2121	8529.76	0.171184	D18G:Y105F:D128G:A156T:L235Q
G158A	wt	amacGFP	486.55	61	1514.99	9454.27	242.767	wt
T543C:T577A	Y185H:V196E	amacGFP	56.01	4	464.761	6329.64	34.1256	Y181H:V192E
G33T:C590A:A626G	V14L	amacGFP	117.43	7	681.115	8762.48	52.9436	V11L
A313G:A451T:G513A:A696T	K108R:Y154F:E175K:M240L	amacGFP	46.59	10	1483.25	8076.22	272.408	K104R:Y150F:E171K:M232L
G33T:G342A	V14L:E118K	amacGFP	383.2	44	1209.02	8599.21	169.983	V11L:E114K
G576A	V196M	amacGFP	729.3	53	1191.65	8357.22	169.917	V192M
C323A:A700T	D241V	amacGFP	61.16	7	1578.52	8492.85	293.392	D233V
G33T:A424T	V14L:E145V	amacGFP	1166.5	71	809.592	7488.7	87.5238	V11L:E141V
T22A:G33T:C242T:C272A:G422A:C605T	F10Y:V14L	amacGFP	69.34	7	511.399	3340.7	78.2855	F7Y:V11L
G33T:T597C:G615T	V14L:Y206H:A212S	amacGFP	55.58	6	864.202	8543.57	87.416	V11L:Y199H:A205S
A6T:C18A:G33T:A120.:T203C:T499C:T589A	K2*:L9M:V14L:K43S:L44W:E45R:I46S:K47S:F48S:I49S:C50A:T51P:T52P:G53A:K54S:L55C:V57C:W59G:T61P:L62S:V63*:T64P:T65P:L66C:S67R:Y68T:G69A:I70S:L71C:C72A:F73S:A74R:R75A:Y76T:E78N:H79T:M80*:K81R:M82*:N83T:D84T:F85S:F86S:K87S:S88P:A89P:M90C:E93K:G94A:Y95T:I96S:Q97R:E98S:R99A:T100P:I101S:F102S:F103S:Q104R:D105T:D106T:G107A:K108S:Y109T:K110R:T111P:R112V:E114R:V115*:K116S:F117S:E118R:G119A:D120T:T121H:L122W…	amacGFP	51.15	4	49.3792	468.155	5.20833	K2*:L6M:V11L:K40S:L41W:E42R:I43S:K44S:F45S:I46S:C47A:T48P:T49P:G50A:K51S:L52C:V54C:W56G:T58P:L59S:V60*:T61P:T62P:L63C:S64R:Y65T:G66A:I67S:L68C:C69A:F70S:A71R:R72A:Y73T:E75N:H76T:M77*:K78R:M79*:N80T:D81T:F82S:F83S:K84S:S85P:A86P:M87C:E89K:G90A:Y91T:I92S:Q93R:E94S:R95A:T96P:I97S:F98S:F99S:Q100R:D101T:D102T:G103A:K104S:Y105T:K106R:T107P:R108V:E110R:V111*:K112S:F113S:E114R:G115A:D116T:T117H:L118W:V11…
G33T:T689C	V14L	amacGFP	1204.2	68	1375.44	9320.16	202.983	V11L
G15T:G33T:G84A:C160A:A220T:C401T:C644T:T655C:T667C	E8*:V14L:V31M:P56H:Y76F:V226A:F230S	amacGFP	48.31	2	0	449	0	E5*:V11L:V28M:P53H:Y73F:V218A:F222S
G33T:T339C	V14L:F117L	amacGFP	1117.23	85	1401.14	8835.86	222.185	V11L:F113L
A226T:A331T	E78V:E114V	amacGFP	45.18	6	1869.91	8001.71	436.978	E75V:E110V
C51A	L20M	amacGFP	666.17	62	1034	8241.13	129.734	L17M
G517T	G176V	amacGFP	620.1	54	1404.25	8560.77	230.344	G172V
G284A:A444T:G468A	N152Y:A160T	amacGFP	53.68	5	1379.15	9500.46	200.208	N148Y:A156T
G33T:T577C:C590A:T669C	V14L:V196A:F231L	amacGFP	122.82	12	983.57	7182.31	134.694	V11L:V192A:F223L
C389A	F133L	amacGFP	110.71	18	1066.11	8323.59	136.551	F129L
G199A:A268T:A381G:C401T:A418G:T493G	G69D:E93V:M131V:K143R:F168C	amacGFP	28.6	3	0	449	0	G66D:E89V:M127V:K139R:F164C
T511A	I174N	amacGFP	1012.43	84	1262.65	7791.79	204.612	I170N
T47C:A301G:A483G	Q104R:K165E	amacGFP	28.48	2	322.687	8058.86	12.9208	Q100R:K161E
G191C:A405G:G422A	I139V	amacGFP	39.4	8	987.615	8782.62	111.058	I135V
G33T:C230G:C257A:A618G:A634G	V14L:H79Q:I213V:N218S	amacGFP	47.22	2	516.387	10882.7	24.5028	V11L:H76Q:I206V:N211S
A510G:C594T:A703G	I174V:H205Y:E242G	amacGFP	60.82	13	1050.36	2537.46	434.791	I170V:H198Y:E234G
G33T:G284A	V14L	amacGFP	359.05	23	1655.85	9361.46	292.884	V11L
T583A	I198N	amacGFP	1160.39	121	1564.93	8926.66	274.348	I194N
G33T:T277A:T382C:T671C	V14L:I96N:M131T	amacGFP	124.26	7	327.322	7492.66	14.2992	V11L:I92N:M127T
T666A	F230I	amacGFP	770.45	59	750.563	6853.46	82.1986	F222I
T334C	V115A	amacGFP	1135.2	96	447.706	2123.8	94.3785	V111A
T421A	L144Q	amacGFP	639.41	58	1133.24	8502.35	151.044	L140Q
C5T:G325A:A505T:A712G	R112H:H172L:K245R	amacGFP	44.16	7	1604.4	12079.7	213.094	R108H:H168L:K237R
C440T	wt	amacGFP	629.07	54	1471.9	9143.87	236.934	wt
G33T:C257T:C536A:T543A	V14L:Y185N	amacGFP	64.54	5	889.071	8036.74	98.3542	V11L:Y181N
T114A:C350T	Y41N	amacGFP	35.79	8	2080.5	9348.28	463.022	Y38N
A313T	K108M	amacGFP	1066.24	101	1380.82	8951.29	213.003	K104M
T195C:G522T:T714.:G714.:A714.	Y68H:G178W:*246.	amacGFP	58.67	4	304.925	610.096	152.401	Y65H:G174W:*238.
G95T:A231T:A319G:T670C	E34D:M80L:K110R:F231S	amacGFP	42.02	8	620.667	1548.58	248.761	E31D:M77L:K106R:F223S
T202C:C260T:A592G	I70T:N204S	amacGFP	159.38	10	744.282	7544.27	73.4274	I67T:N197S
C540A	H184N	amacGFP	523.72	42	868.152	5718.7	131.794	H180N
G33T:C224T:T382C:C449T:G520T:A568G	V14L:M131T:G177V:D193G	amacGFP	34.45	6	1266.72	6465.27	248.183	V11L:M127T:G173V:D189G
A360G:T608C	N124D	amacGFP	71.64	6	27.4394	454.336	1.6572	N120D
G158T:A227G	wt	amacGFP	38.32	3	1191.88	10190.7	139.399	wt
A7G:G33T:G126A:T295A:G392T:G522T:C644A	K2R:V14L:E45K:F102Y:K134N:G178W	amacGFP	29.79	8	1547.37	4927.18	485.947	K2R:V11L:E42K:F98Y:K130N:G174W
G33T:T655C	V14L:V226A	amacGFP	639.85	81	1128.67	7753.05	164.309	V11L:V218A
G33T:T64C	V14L:V24A	amacGFP	397.41	64	1888.85	6970.18	511.861	V11L:V21A
A30G:G33T:A73G:A337T:C695A	I13V:V14L:H27R:K116M	amacGFP	176.2	12	724.241	7961.37	65.8837	I10V:V11L:H24R:K112M
A351T:C560A	T121S	amacGFP	130.93	11	734.11	8537.97	63.1202	T117S
C179T:T277A	I96N	amacGFP	80.92	4	203.837	7503.7	5.53723	I92N
G199A:C540T	G69D:H184Y	amacGFP	28.8	4	206.685	662.05	64.5252	G66D:H180Y
A138G:A174G:C287G:C459G:A507T	I49V:T61A:P157A:N173Y	amacGFP	37.23	7	440.935	541.149	359.28	I46V:T58A:P153A:N169Y
A121G:C171A:C401T:G467T:G525T	K43R:P60T:K159N:V179L	amacGFP	28.33	4	845.973	7848.33	91.1875	K40R:P57T:K155N:V175L
C92A:A133T:G468T:A472T:G654C	K47M:A160S:N161I:V226L	amacGFP	43.72	4	1594.84	9145.5	278.116	K44M:A156S:N157I:V218L
G28T:G33T	G12V:V14L	amacGFP	510.05	72	1597.84	7206.79	354.26	G9V:V11L
C398G	D136E	amacGFP	35.02	7	1801.77	9968.73	325.654	D132E
T487C:T619C	V166A:I213T	amacGFP	26.75	5	1759.44	12520.4	247.247	V162A:I206T
G33T:A435G:A712G	V14L:N149D:K245R	amacGFP	71.73	7	230.938	2967.79	17.9705	V11L:N145D:K237R
G60A:G537T	D23N:D183Y	amacGFP	93	6	1544.38	11194.7	213.057	D20N:D179Y
G50A:C221T:T387A:G411A:A696T	F133I:G141R:M240L	amacGFP	47.08	2	887.552	7949.19	99.0981	F129I:G137R:M232L
G33T:T207A	V14L:C72S	amacGFP	644.45	65	1014.1	6320.6	162.707	V11L:C69S
A13T:A24G:C311G	E7V:T11A	amacGFP	169.73	15	1076.7	8397.73	138.048	E4V:T8A
G33T:A301G	V14L:Q104R	amacGFP	679.19	82	1516.06	9747.86	235.788	V11L:Q100R
G410A:G713A	wt	amacGFP	66.78	9	1029.45	9549.44	110.977	wt
A304G	D105G	amacGFP	772.44	61	1419.57	9377.51	214.895	D101G
C257A:A331T	E114V	amacGFP	29.03	2	1018.68	8999.01	115.314	E110V
C92T	wt	amacGFP	734.91	48	1141.28	9681.88	134.531	wt
T19C:A319G:A568G:G631A:G662T:C690A	L9P:K110R:D193G:R217H:H238N	amacGFP	44.4	6	690.018	4259.83	111.771	L6P:K106R:D189G:R210H:H230N
G33T:G93A	V14L:E34K	amacGFP	101.36	13	836.959	7894.52	88.7324	V11L:E31K
A301T:G502A:C573G:G611T:C676A	Q104L:R171H:P195A:Q210H:A233D	amacGFP	34.61	3	51.6147	470.284	5.66482	Q100L:R167H:P191A:Q203H:A225D
C152T:C264T:G384T:G422A:G482C	P92S:D132Y	amacGFP	32.29	6	755.992	4982.1	114.715	P88S:D128Y
A552G	N188D	amacGFP	486.5	53	122.136	487.131	30.6224	N184D
G377A:T382A	M131K	amacGFP	40.3	2	24.7804	9618.91	0.0638398	M127K
G33T:A360T:G413T:G502T	V14L:N124Y:R171L	amacGFP	65.24	6	46.0281	465.275	4.55341	V11L:N120Y:R167L
G54C:A133G:C600A	D21H:K47R:L207M	amacGFP	30.29	3	885.202	5824.45	134.533	D18H:K44R:L200M
G530T:C635T	Q180H	amacGFP	98.45	8	1008.92	9175.71	110.937	Q176H
G645T	D223Y	amacGFP	285.64	41	1318.3	4570.28	380.264	D215Y
T31C:G33T:A49G:T647C	I13T:V14L:E19G	amacGFP	36.48	8	1101.69	6090.65	199.276	I10T:V11L:E16G
A13T:C404T:A490G:T526C	E7V:N167S:V179A	amacGFP	35.59	4	528.025	7610.09	36.637	E4V:N163S:V175A
G477T	G163C	amacGFP	1371.63	68	964.072	8033.51	115.695	G159C
A614T	wt	amacGFP	946.28	70	1196.95	9485.48	151.041	wt
C380A:A405G:C464G	I139V:D158E	amacGFP	92.09	7	377.781	7802.14	18.2922	I135V:D154E
G33T:A234G:C285G	V14L:K81E:R99G	amacGFP	57.98	6	44.804	464.307	4.32344	V11L:K78E:R95G
G33T:T135G:A269T:C575A	V14L:F48V:E93D	amacGFP	32.81	2	577.481	14458.9	23.0643	V11L:F45V:E89D
A269G:T562G	L191W	amacGFP	45.63	5	1084.72	7457.22	157.783	L187W
G254A:C275T:G392T:G567A:G576T	K134N:D193N:V196L	amacGFP	28.82	2	124.954	7941.72	1.96602	K130N:D189N:V192L
A241C:C289A:G374A	N83T:T100N	amacGFP	44.75	4	138.394	5816.64	3.29277	N80T:T96N
G33T:A381G:A436T:A444G:A614T	V14L:M131V:N149I:N152D	amacGFP	42.62	8	209.655	2139.99	20.5399	V11L:M127V:N145I:N148D
G33T:A331T:T526A:C695A:A700T	V14L:E114V:V179E:D241V	amacGFP	41.85	4	226.409	7031.27	7.29045	V11L:E110V:V175E:D233V
T21A:G33T:A75G:C572T	F10I:V14L:K28E	amacGFP	74.71	11	709.444	6139.58	81.9779	F7I:V11L:K25E
A30G:G33T	I13V:V14L	amacGFP	347.63	34	1296.42	9290.6	180.903	I10V:V11L
G151A	G53D	amacGFP	917.07	81	1390.89	8419.51	229.772	G50D
C640T	T221I	amacGFP	305.63	26	1296.16	9312.91	180.398	T213I
G63A:T277C:A463G:G682A	V24I:I96T:D158G:G235E	amacGFP	103.07	8	609.352	5434.48	68.325	V21I:I92T:D154G:G227E
G33T:T470G:T647A:A685T	V14L:D223E:H236L	amacGFP	37.3	6	1327.41	9347.87	188.493	V11L:D215E:H228L
G33T:C167A:A381T	V14L:M131L	amacGFP	107.35	11	1055.95	7813.28	142.71	V11L:M127L
G622T	S214I	amacGFP	272.75	29	1096.39	11174.2	107.576	S207I
A24G:G33T:G374T	T11A:V14L	amacGFP	87.78	7	587.127	8384.22	41.1151	T8A:V11L
T34C:C110T	V14A	amacGFP	40.27	5	1107.51	7427.9	165.13	V11A
G33T:A484C	V14L:K165T	amacGFP	81.23	8	1316.95	9078.49	191.04	V11L:K161T
A30T	I13F	amacGFP	2567.27	185	1132.51	8974.75	142.91	I10F
A253G	K87R	amacGFP	547.82	67	482.208	1956.37	118.855	K84R
G99A:G162A:C287A:T641A	E36K:V57M	amacGFP	83.14	7	737.086	5200.13	104.477	E33K:V54M
A280T	Q97L	amacGFP	403.43	47	185.76	539.623	63.946	Q93L
A100G:T608C	E36G	amacGFP	28.55	2	547.618	7932.02	37.8069	E33G
G33T:C116A:T452A	V14L:Y41*:Y154*	amacGFP	30.61	3	0	449	0	V11L:Y38*:Y150*
G33T:A490G	V14L:N167S	amacGFP	1305.63	86	1421.89	8586.1	235.469	V11L:N163S
G33T:G519A	V14L:G177S	amacGFP	526.16	42	941.798	8763.93	101.209	V11L:G173S
T238A:C540A	M82K:H184N	amacGFP	54.56	4	603.106	5562.53	65.3906	M79K:H180N
G29T:G33T:C416T:C504T	V14L:H172Y	amacGFP	77.31	6	133.263	3360.36	5.28489	V11L:H168Y
A13T:G33T:A687T	E7V:V14L:T237S	amacGFP	79.62	4	1251.05	9313.06	168.056	E4V:V11L:T229S
G125T	wt	amacGFP	1808.86	139	1541.91	9235.34	257.433	wt
C257A:C365T:A549G:T557A:C566A:G682T	T187A:G235V	amacGFP	121.9	7	307.865	8345.32	11.3574	T183A:G227V
G33T:G611A	V14L	amacGFP	227.86	13	1100.81	9206.96	131.615	V11L
G33T:C414T	V14L:H142Y	amacGFP	437.2	31	1173.91	7636.97	180.445	V11L:H138Y
A76T:C509T	K28M	amacGFP	43.85	8	1245.17	9586.73	161.729	K25M
A403G:A456G:A529G:C710G	N138S:M156V:Q180R:Y244*	amacGFP	34.09	2	658.241	7459.08	58.0878	N134S:M152V:Q176R:Y236*
G611A	wt	amacGFP	592.42	39	1063.96	9253.82	122.329	wt
G29T:C32T	wt	amacGFP	99.74	3	478.786	8997.92	25.4765	wt
A226G	E78G	amacGFP	723.88	65	1243.62	9190.54	168.282	E75G
G33T:G344T:T655C	V14L:E118D:V226A	amacGFP	47.61	4	957.435	7922.29	115.709	V11L:E114D:V218A
G410T:A484T:G565T	K165M:G192V	amacGFP	55.23	2	535.915	7929.39	36.2203	K161M:G188V
G15A:G60A:A610T	E8K:D23N:Q210L	amacGFP	39.37	2	957.531	7142.21	128.373	E5K:D20N:Q203L
C89T	wt	amacGFP	974.83	73	1490.78	9559.9	232.474	wt
T31C:G33T:G86T:T136G	I13T:V14L:F48C	amacGFP	81.99	2	829.717	17092.8	40.276	I10T:V11L:F45C
C98T	wt	amacGFP	1168.68	83	1146.88	9181.28	143.262	wt
C42A:C149A:G328A:A349G:T556A:T557A:A685T	L17M:G113E:D120G:V189E:H236L	amacGFP	36.13	4	0	449	0	L14M:G109E:D116G:V185E:H228L
G344A:T433C:G515T	F148S:E175D	amacGFP	36.29	5	410.889	735.847	229.436	F144S:E171D
T434C	wt	amacGFP	682.38	51	1276.63	9080.82	179.475	wt
T492A	F168I	amacGFP	1039.18	65	518.253	4727.01	56.8195	F164I
T647A	D223E	amacGFP	1762.9	126	1305.55	9217.65	184.913	D215E
G9T:G33T:A331T:T674A:T678C	G6C:V14L:E114V:S232R:C234R	amacGFP	30.21	2	54.7049	7357.44	0.406748	G3C:V11L:E110V:S224R:C226R
A465G	K159E	amacGFP	1098.21	80	1551.39	9209.96	261.327	K155E
G33T:C42G:G53A:C300G:T543A	V14L:L17V:Q104E:Y185N	amacGFP	73.81	6	1717.46	9240.83	319.198	V11L:L14V:Q100E:Y181N
G33T:A94G:A495C:A610T	V14L:E34G:K169Q:Q210L	amacGFP	33.27	3	998.06	7040.04	141.494	V11L:E31G:K165Q:Q203L
G683A:A691T	H238L	amacGFP	32.73	5	819.18	8177.84	82.0578	H230L
C616T	A212V	amacGFP	784.2	79	1508.54	9809.13	231.998	A205V
G374T:G551A	wt	amacGFP	26.52	6	812.665	7680.31	85.9892	wt
A444G:A461T	N152D	amacGFP	47.49	5	607.023	7938.09	46.4188	N148D
T470A:T561A:C593T	L191M	amacGFP	91.63	17	1747.58	8469.09	360.611	L187M
T31A:G33T	I13N:V14L	amacGFP	157.38	16	587.421	8502.91	40.5817	I10N:V11L
C266T:A461G:C528A:T589C	Q180K:I203T	amacGFP	106.79	8	1500.9	10957.2	205.589	Q176K:I196T
G33T:A461C:A475T:G524A	V14L:N162I	amacGFP	38.24	5	984.652	8431.89	114.985	V11L:N158I
G33T:C257T:A397G:C684T	V14L:D136G:H236Y	amacGFP	33.78	4	1729.66	9109.62	328.413	V11L:D132G:H228Y
T195A:A316T	Y68N:Y109F	amacGFP	72.15	5	0	449	0	Y65N:Y105F
A49G	E19G	amacGFP	682.72	103	1181.54	7063	197.656	E16G
G33T:T210C:T247A:A261T	V14L:F73L:F85Y:M90L	amacGFP	34.06	6	580.975	3372.23	100.092	V11L:F70L:F82Y:M87L
G12T:G33T:A73T:T181C:A465T:C635T:A696T:C705G	E7*:V14L:H27L:V63A:K159*:M240L:L243V	amacGFP	59.8	4	130.579	603.273	28.2638	E4*:V11L:H24L:V60A:K155*:M232L:L235V
G33T:T426C:C644G	V14L:Y146H	amacGFP	80.51	6	944.425	5294.05	168.479	V11L:Y142H
G155A:A465G:T470C:T487C:A505T	K159E:V166A:H172L	amacGFP	59.8	2	1540.02	15252.6	155.491	K155E:V162A:H168L
A484G:C690A	K165R:H238N	amacGFP	45.41	4	467.574	8155.39	26.8074	K161R:H230N
G9C:G33T:T47C:T326C:A514T	G6R:V14L:E175V	amacGFP	26.08	9	857.602	7320.34	100.471	G3R:V11L:E171V
G33T:A349G:A651G:C690A	V14L:D120G:M225V:H238N	amacGFP	35.1	4	131.992	1402.71	12.4201	V11L:D116G:M217V:H230N
G33T:A391G:G522A:C554T:T589C:A696T	V14L:K134R:G178R:I203T:M240L	amacGFP	26.07	4	1796.24	9897.04	326.003	V11L:K130R:G174R:I196T:M232L
G33T:T238A	V14L:M82K	amacGFP	232.33	13	1033.92	9352.54	114.299	V11L:M79K
C98T:A353T:A376G:A397T:C521A:A614T:T686C	K129R:D136V	amacGFP	59.73	8	1592.32	8512.48	297.856	K125R:D132V
G33T:T47C:A121G:T195A:T210A:G423A:G615A:G693T	V14L:K43R:Y68N:F73I:E145K:A212T:G239C	amacGFP	67.97	5	481.151	627.092	369.174	V11L:K40R:Y65N:F70I:E141K:A205T:G231C
A288G:A484G	T100A:K165R	amacGFP	40.83	5	1790.82	9249.11	346.742	T96A:K161R
A7T:G378A:A490G:C642T	K2M:G130S:N167S:R222C	amacGFP	34.63	5	904.981	5163.03	158.626	K2M:G126S:N163S:R214C
G33T:C87A:C218A:A304G	V14L:R32S:D105G	amacGFP	67.86	10	1303.2	7432.53	228.499	V11L:R29S:D101G
T232C:C705T	M80T	amacGFP	39.18	3	842.348	6929.34	102.398	M77T
G33T:C137A:C311A	V14L:F48L	amacGFP	32.44	8	682.809	6424.7	72.5681	V11L:F45L
G33T:C113T:A691T	V14L:H238L	amacGFP	74.28	8	1204.81	8252.07	175.903	V11L:H230L
G33T:A183T:A229T	V14L:T64S:H79L	amacGFP	46.78	7	586.931	4907.26	70.1996	V11L:T61S:H76L
A127T:C167A:A402T	E45V:N138Y	amacGFP	51.5	8	1951.29	8641.69	440.599	E42V:N134Y
G33T:C305T:A376G:C596T	V14L:K129R	amacGFP	195.83	13	990.027	8555.85	114.56	V11L:K125R
G239A:A475T:T577C	M82I:N162I:V196A	amacGFP	39.05	4	1442.8	7777.88	267.64	M79I:N158I:V192A
C185T:G399T:G502T	G137C:R171L	amacGFP	26.51	4	542.793	4998.35	58.9442	G133C:R167L
G44A:A353G:C362T	wt	amacGFP	47.69	3	549.657	9989.83	30.243	wt
T203C:A427T:A498T:C575A:A646T	Y146F:I170F:D223V	amacGFP	27.75	4	358.326	698.277	183.878	Y142F:I166F:D215V
C110T:G158A:G213A:C539A:C620A	A74T:D183E	amacGFP	34.98	7	443.188	4741.37	41.4258	A71T:D179E
A67T:C167G:C242T	H25L	amacGFP	48.29	9	1695.16	8192.03	350.777	H22L
A240T:A391G:A403T:C629T:A696G:G707C	N83Y:K134R:N138I:M240V	amacGFP	70.32	5	873.311	9035.43	84.4091	N80Y:K130R:N134I:M232V
T195C:A370G	Y68H:E127G	amacGFP	50.23	2	0	449	0	Y65H:E123G
C146T	wt	amacGFP	487.12	37	1064.15	9311.35	121.617	wt
C146A:T192A:C257T:C491G:G643A	S67T:N167K:R222H	amacGFP	53.93	5	860.534	5365.43	138.017	S64T:N163K:R214H
G282A:G527A	E98K	amacGFP	60.4	8	1274.84	9092.48	178.744	E94K
G638T:T706C	E219D:L243P	amacGFP	100.98	2	136.048	9076.42	2.03924	E212D:L235P
G33T:G419T	V14L:K143N	amacGFP	259.82	16	1033.06	8743.04	122.064	V11L:K139N
G33T:A73T:G267A:G488A:C569T:T641A	V14L:H27L:E93K	amacGFP	53.61	4	517.086	8190.11	32.6465	V11L:H24L:E89K
G33T:C566T	V14L	amacGFP	556.89	43	1114.06	9226.98	134.51	V11L
G33T:A418C	V14L:K143T	amacGFP	44.78	5	518.19	8685.63	30.9155	V11L:K139T
G33T:A240G:A427T:A444G:T601G:T666A:T706C	V14L:N83D:Y146F:N152D:L207R:F230I:L243P	amacGFP	41.43	5	73.0395	527.439	10.1145	V11L:N80D:Y142F:N148D:L200R:F222I:L235P
A402G:C676T:A696G	N138D:A233V:M240V	amacGFP	174.56	12	1258.59	6541.87	242.141	N134D:A225V:M232V
A490G	N167S	amacGFP	551.98	55	1638.62	8954.5	299.859	N163S
A331G	E114G	amacGFP	1701.7	113	1102.18	8469.31	143.436	E110G
G33T:T670A	V14L:F231Y	amacGFP	533.88	61	336.656	780.485	145.214	V11L:F223Y
A115T:T448C:T669C	Y41F:V153A:F231L	amacGFP	44.12	3	615.876	4835.55	78.4407	Y38F:V149A:F223L
T382A:T526A:G638A:G694A	M131K:V179E:G239D	amacGFP	63.4	4	661.565	7813.1	56.0173	M127K:V175E:G231D
G33T:C278A:T382C	V14L:M131T	amacGFP	98.22	9	973.274	8466.68	111.881	V11L:M127T
A283G:T706C	E98G:L243P	amacGFP	32.43	4	639.183	7612.86	53.6664	E94G:L235P
T34C:C587A:C690A	V14A:H238N	amacGFP	103.4	7	1052.77	8493.37	130.492	V11A:H230N
C80T:G393A	E135K	amacGFP	151.74	8	694.312	9795.36	49.2141	E131K
C585T:C710T	P199S	amacGFP	29.66	2	385.053	5581.29	26.5648	P195S
A451T:C690A	Y154F:H238N	amacGFP	28.12	4	739.276	7962.41	68.6387	Y150F:H230N
G29T:G33T	V14L	amacGFP	630.76	38	1173.19	9320.56	147.671	V11L
T589A	I203N	amacGFP	485.37	47	1772.61	9448.84	332.542	I196N
A276T	I96F	amacGFP	709.25	67	733.683	3704.26	145.317	I92F
G93C:C149T:T406C	E34Q:I139T	amacGFP	29.29	5	1539.01	6930.83	341.741	E31Q:I135T
G33T:A67G	V14L:H25R	amacGFP	1318.17	108	943.541	7701.98	115.59	V11L:H22R
A7G:C26A:A427G:A461G:A496G	K2R:Y146C:K169R	amacGFP	32.69	5	656.755	6653.84	64.8238	K2R:Y142C:K165R
G33T:C222A:A268G:A435G:A508T	V14L:P77T:E93G:N149D:N173I	amacGFP	29.43	2	0	449	0	V11L:P74T:E89G:N145D:N169I
T473C	wt	amacGFP	241.91	22	1003	9038.87	111.298	wt
A712T	K245M	amacGFP	445.44	45	1272.77	8804.12	183.999	K237M
G33T:A451T	V14L:Y154F	amacGFP	840.43	51	1093.82	9006.43	132.843	V11L:Y150F
G33T:C149A:A201T:C640T	V14L:I70F:T221I	amacGFP	27.66	2	183.315	1272.63	26.4055	V11L:I67F:T213I
C32T:G384A:T487C	D132N:V166A	amacGFP	260.03	20	1125.28	11080.3	114.28	D128N:V162A
G63A:A121T:C449A	V24I:K43M	amacGFP	36.71	6	674.104	8127.71	55.9095	V21I:K40M
T666C	F230L	amacGFP	995.62	97	1565.61	8431.37	290.718	F222L
A234C	K81Q	amacGFP	152.41	16	1006.75	8688.74	116.651	K78Q
G33T:T40C:A49T:G155A:T450C:G693T	V14L:V16A:E19V:Y154H:G239C	amacGFP	34.33	2	312.704	7362.67	13.281	V11L:V13A:E16V:Y150H:G231C
C587T	wt	amacGFP	244.77	25	1219.46	9675.02	153.704	wt
G48A:T426C:T670C	E19K:Y146H:F231S	amacGFP	67.25	6	72.4549	511.631	10.2607	E16K:Y142H:F223S
G33T:T232A	V14L:M80K	amacGFP	173.07	18	609.323	2845.25	130.489	V11L:M77K
A75G:A81T:A235G	K28E:S30C:K81R	amacGFP	174.45	11	852.014	8762.23	82.8473	K25E:S27C:K78R
A133T:A183G	K47M:T64A	amacGFP	27.98	2	282.743	2498.09	32.0019	K44M:T61A
G33T:T135C	V14L:F48L	amacGFP	903.12	105	1217.44	7462.12	198.625	V11L:F45L
C469A	A160D	amacGFP	415.26	25	947.672	8693.82	103.301	A156D
A76C:A127G:A514C:A672G:G698T	K28T:E45G:E175A:S232G:M240I	amacGFP	142.23	7	436.021	8166.85	23.2788	K25T:E42G:E171A:S224G:M232I
G33T:C188A:G383T:C500A:G563T:T666C	V14L:M131I:L191F:F230L	amacGFP	31.2	3	896.691	7018.99	114.554	V11L:M127I:L187F:F222L
G281A	wt	amacGFP	315.8	34	1719.79	9197.8	321.564	wt
A65T:A402G	N138D	amacGFP	67.47	7	699.37	8152.66	59.9949	N134D
A716G	*246W	amacGFP	331.73	24	1123.61	9765.23	129.285	*238W
C616G	A212G	amacGFP	186.78	13	842.393	7979.15	88.9352	A205G
A391T:A498G:T706A	K134M:I170V:L243Q	amacGFP	26.02	5	1087.77	16639	71.1126	K130M:I166V:L235Q
A186T:T388A:C572A	T65S:F133Y	amacGFP	73.93	4	1536.96	5804.18	406.992	T62S:F129Y
G33T:A507C:T670G	V14L:N173H:F231C	amacGFP	63.89	7	544.347	741.029	399.868	V11L:N169H:F223C
G33C:A67G:C690A	V14L:H25R:H238N	amacGFP	28.49	2	683.981	9196.43	50.8708	V11L:H22R:H230N
G33T:T686C	V14L	amacGFP	666.38	42	1110.01	8968.48	137.383	V11L
C71T:A696G	M240V	amacGFP	71.02	7	1460.57	9212.06	231.573	M232V
C146T:C363T:A424T:A483C:G515A	R125C:E145V:K165Q	amacGFP	51.49	8	1121.58	6226.36	202.033	R121C:E141V:K161Q
C59T:A402T:C428T:T543A:A621T:T689C	N138Y:Y185N:S214C	amacGFP	160.06	9	842.342	9460.72	74.9985	N134Y:Y181N:S207C
A81G:A471T	S30G:N161Y	amacGFP	115.04	9	697.017	8200.18	59.2467	S27G:N157Y
G477A	G163S	amacGFP	577.84	40	1602.67	8376.15	306.651	G159S
G33T:A288T:A438G:C560A	V14L:T100S:S150G	amacGFP	65.65	10	1425.25	6132.11	331.261	V11L:T96S:S146G
C437T:T655A	V226D	amacGFP	32.72	3	503.648	8231.99	30.8141	V218D
G411T:C512T	G141W	amacGFP	132.62	5	742.655	8105.96	68.0408	G137W
T277C:A353T:G458T:G615A:A700G	I96T:M156I:A212T:D241G	amacGFP	58.03	4	296.701	4919.85	17.8931	I92T:M152I:A205T:D233G
G33T:T706C	V14L:L243P	amacGFP	949	98	1373.5	9515.22	198.261	V11L:L235P
G439T	S150I	amacGFP	448.46	37	873.99	5119.89	149.194	S146I
G15T:T46C:A370T:G662A	E8*:I18T:E127V	amacGFP	64.85	4	72.9103	529.012	10.0488	E5*:I15T:E123V
G33T:A227T:G329T:A438G	V14L:E78D:S150G	amacGFP	87.94	9	886.262	6758.36	116.22	V11L:E75D:S146G
A496G	K169R	amacGFP	561.81	71	1377.03	9542.67	198.709	K165R
G15T:G33T:G70A:G329T:G519.:G520A	E8*:V14L:G26D:G177T:V179C:Q180S:L181S:A182P:D183T:H184T:Y185T:Q186R:T187R:N188T:V189F:L191W:G192A:D193T:G194A:V196C:L197*:I198S:I203S:N204T:H205T:Y206T:L207*:S208A:C209V:Q210R:T211Q:A212P:I213S:S214A:D216T:R217V:N218T:E219R:T221L:R222A:D223I:H224T:M225W:V226S:L228W:E229S:F230S:F231L:S232V:A233P:C234V:H236I:T237L:H238T:G239A:M240W:D241T:E242S:L243C:Y244T:K245S	amacGFP	66.25	3	3.77529	452.234	0.0315165	E5*:V11L:G23D:G173T:V175C:Q176S:L177S:A178P:D179T:H180T:Y181T:Q182R:T183R:N184T:V185F:L187W:G188A:D189T:G190A:V192C:L193*:I194S:I196S:N197T:H198T:Y199T:L200*:S201A:C202V:Q203R:T204Q:A205P:I206S:S207A:D209T:R210V:N211T:E212R:T213L:R214A:D215I:H216T:M217W:V218S:L220W:E221S:F222S:F223L:S224V:A225P:C226V:H228I:T229L:H230T:G231A:M232W:D233T:E234S:L235C:Y236T:K237S
A231G	M80V	amacGFP	854.77	67	1266.92	8457.33	189.786	M77V
A13C:A226T:A552G	E7A:E78V:N188D	amacGFP	33.54	4	35.4797	458.17	2.74747	E4A:E75V:N184D
G33T:A438T	V14L:S150C	amacGFP	842.88	85	1257.56	8430.19	187.596	V11L:S146C
A444G:T511C	N152D:I174T	amacGFP	28.01	2	270.722	6846.62	10.7047	N148D:I170T
G33T:G35A:A394T:C404T	V14L:E135V	amacGFP	47.4	8	991.437	6558.29	149.879	V11L:E131V
G33T:C584T	V14L	amacGFP	529.9	30	797.73	9413.62	67.6014	V11L
G342C:G537T:A541T:T670C	E118Q:D183Y:H184L:F231S	amacGFP	48.94	2	0	449	0	E114Q:D179Y:H180L:F223S
C352T	T121I	amacGFP	113.06	11	1250.21	8187.69	190.901	T117I
G33T:A121T:A127T:C242T:T671C	V14L:K43M:E45V	amacGFP	120.51	7	639.023	8423.88	48.4753	V11L:K40M:E42V
T232A	M80K	amacGFP	511.94	47	988.751	5612.84	174.177	M77K
C109A:T657C	A39D:F227L	amacGFP	81.79	3	372.541	5688.91	24.3961	A36D:F219L
A115T:G413T:G527A:T608C:A621G:A624G:A709T	Y41F:S214G:K215E:Y244F	amacGFP	41.23	5	1277.05	5664.06	287.93	Y38F:S207G:K208E:Y236F
C420T	wt	amacGFP	398.04	28	1356.28	9748.22	188.699	wt
C579T	wt	amacGFP	575.13	42	1381.7	9713.81	196.534	wt
G33T:C56T:A241G:A307G:T657C	V14L:N83S:D106G:F227L	amacGFP	36.1	4	591.37	8182.02	42.7423	V11L:N80S:D102G:F219L
C545T:C605A	S208R	amacGFP	77.75	8	640.999	10049.6	40.8851	S201R
G33T:G103T	V14L:G37V	amacGFP	33.88	9	504.001	795.868	319.17	V11L:G34V
G39A:G93C:A112G:T689C	V16I:E34Q:D40G	amacGFP	27.61	4	1578.34	8856.19	281.288	V13I:E31Q:D37G
G33T:T382C	V14L:M131T	amacGFP	722.62	50	1299.35	9693.46	174.17	V11L:M127T
G458A	M156I	amacGFP	715.33	70	1389.81	9111.96	211.983	M152I
C260A	wt	amacGFP	688.66	58	1103.21	9310.66	130.719	wt
A510T	I174F	amacGFP	307.95	31	1445.45	8227.71	253.939	I170F
C572A	wt	amacGFP	191.54	22	1512.72	9751.89	234.653	wt
A6T:T34C:A61T:A144T:T493C:T577A:C616T	K2*:V14A:D23V:T51S:F168S:V196E:A212V	amacGFP	39.16	4	67.2613	493.279	9.17144	K2*:V11A:D20V:T48S:F164S:V192E:A205V
G33T:A700G	V14L:D241G	amacGFP	578.8	52	1367.59	9401.35	198.94	V11L:D233G
A227G:G399T	G137C	amacGFP	38.54	4	753.132	7181.15	78.9856	G133C
A76T:A133G	K28M:K47R	amacGFP	45.75	9	934.172	6896.18	126.545	K25M:K44R
A403G	N138S	amacGFP	303.49	33	939.551	7822.16	112.853	N134S
A360G:C512T	N124D	amacGFP	44.69	5	69.3032	498.582	9.63319	N120D
C87T:T647A:T689C:T706C	R32C:D223E:L243P	amacGFP	119.67	8	421.505	8166.71	21.755	R29C:D215E:L235P
C536T	wt	amacGFP	309.59	42	1574.25	9794.95	253.015	wt
G33T:G191C	V14L	amacGFP	308.82	14	791.339	8980.94	69.7273	V11L
G33T:T47C:A67T:T666A:A696T	V14L:H25L:F230I:M240L	amacGFP	34.89	4	903.582	6510.45	125.408	V11L:H22L:F222I:M232L
C167A:A483G:G525A	K165E:V179M	amacGFP	70.2	7	1184.01	8806.66	159.184	K161E:V175M
A283T:C676T	E98V:A233V	amacGFP	37.77	8	1208.35	6537.77	223.333	E94V:A225V
C398G:A461C	D136E	amacGFP	37.11	6	1578.88	9264.54	269.077	D132E
G33T:A304G:C440G:A549T	V14L:D105G:S150R:T187S	amacGFP	55.14	4	811.17	8939.66	73.6043	V11L:D101G:S146R:T183S
G33T:A240G:A474G:G555A:C701A	V14L:N83D:N162D:V189I:D241E	amacGFP	38.89	2	75.0164	3938.44	1.42886	V11L:N80D:N158D:V185I:D233E
G33T:A132G:C317T:C380A:G497T	V14L:K47E:K169N	amacGFP	57.15	5	1612.45	6412.36	405.466	V11L:K44E:K165N
G33T:G102C	V14L:G37R	amacGFP	62.63	4	50.7237	469.414	5.48108	V11L:G34R
G33T:A121G	V14L:K43R	amacGFP	589.37	43	1341.37	8880.82	202.603	V11L:K40R
G53T	wt	amacGFP	1856.63	128	1354.28	9313.66	196.923	wt
A106G	D38G	amacGFP	1230.29	99	942.182	7481.05	118.661	D35G
A100T:C264T:A313T	E36V:P92S:K108M	amacGFP	52.12	6	842.426	5150.57	137.787	E33V:P88S:K104M
T31C:G33T:T526A	I13T:V14L:V179E	amacGFP	32.32	5	1453.79	7478.09	282.626	I10T:V11L:V175E
G33T:C701T	V14L	amacGFP	254.89	20	817.599	8696.52	76.866	V11L
G4A:G33T	S1N:V14L	amacGFP	526.14	55	1118.8	8863.7	141.217	S1N:V11L
A132G:T326C:T589A	K47E:I203N	amacGFP	66.74	4	844.573	7893.16	90.3699	K44E:I196N
G33T:G101A:A268T:T561A	V14L:E93V:L191M	amacGFP	27.6	6	729.327	8038.46	66.1716	V11L:E89V:L187M
G48A:A685C:A696T	E19K:H236P:M240L	amacGFP	71	2	238.819	8788.17	6.48994	E16K:H228P:M232L
G33T:T114C	V14L:Y41H	amacGFP	805.71	51	1483.41	9027.61	243.752	V11L:Y38H
G33T:A336G	V14L:K116E	amacGFP	359.7	59	1480.73	6990.41	313.654	V11L:K112E
T211A:T487C:C617T	F73Y:V166A	amacGFP	118.43	13	1787.3	9174.72	348.18	F70Y:V162A
C25T:G33T:A229G:T597C:C710A	T11I:V14L:H79R:Y206H:Y244*	amacGFP	44.68	2	303.783	7912.47	11.6631	T8I:V11L:H76R:Y199H:Y236*
G33T:A331T	V14L:E114V	amacGFP	576.95	47	1204.93	9362.08	155.078	V11L:E110V
A568T	D193V	amacGFP	857.6	65	1544.44	9529.44	250.309	D189V
G374T	wt	amacGFP	592.08	50	1152.55	9686.08	137.143	wt
A127G	E45G	amacGFP	787.61	60	1255.43	9750.55	161.642	E42G
A625T	K215I	amacGFP	1005.78	71	1138.69	8885.61	145.923	K208I
G33T:G412C	V14L:G141A	amacGFP	79.75	8	701.832	8682.17	56.7333	V11L:G137A
G33T:G332A	V14L	amacGFP	299.93	23	977.264	8845.98	107.964	V11L
G33T:G412T:T532A	V14L:G141V:L181H	amacGFP	35.41	7	1256.11	6467.86	243.945	V11L:G137V:L177H
C98T:A153G:G155A:G565T	K54E:G192V	amacGFP	86.52	4	391.422	8425.14	18.185	K51E:G188V
C143T	wt	amacGFP	1468.33	109	1139.47	9394.66	138.205	wt
G108T:C123T:A147G:G164A:G571T:T686A	A39S:T52A:G194V:H236Q	amacGFP	99.05	8	548.291	7639.76	39.3497	A36S:T49A:G190V:H228Q
G33T:G681T	V14L:G235W	amacGFP	570.32	24	599.208	8236.54	43.5923	V11L:G227W
C152T:G422C:A442T	H151L	amacGFP	29.55	2	0	449	0	H147L
A496G:A529T:G537A	K169R:Q180L:D183N	amacGFP	49.93	2	267.28	11237	6.35746	K165R:Q176L:D179N
G33T:C98G:T387C:G422T:G468A:T511C	V14L:F133L:A160T:I174T	amacGFP	64.12	6	1113.03	7034.38	176.112	V11L:F129L:A156T:I170T
G33T:G126C:T532C	V14L:E45Q:L181P	amacGFP	62.46	4	1047.68	8064.16	136.113	V11L:E42Q:L177P
T43C:C171T:A274T:C347T:T454C:T543A:C585A:C594A:C617G:A637G:C650T	L17P:P60S:Y95F:I155T:Y185N:P199T:H205N:E219G	amacGFP	29.69	5	1118.81	2652.32	471.937	L14P:P57S:Y91F:I151T:Y181N:P195T:H198N:E212G
G33T:G125A:A174T:A288G:A313T:T473C:A591T:T632A	V14L:T61S:T100A:K108M:N204Y	amacGFP	42.52	2	423.502	7262.88	24.6946	V11L:T58S:T96A:K104M:N197Y
A81T:A402T	S30C:N138Y	amacGFP	193.34	13	1033.98	7681.54	139.179	S27C:N134Y
G33T:A144T:C503A:G699A	V14L:T51S:D241N	amacGFP	29.11	6	616.324	8148.37	46.6174	V11L:T48S:D233N
G27A:G33T:G101T	G12R:V14L:E36D	amacGFP	35.21	3	1000.77	8301.69	120.643	G9R:V11L:E33D
T136A	F48Y	amacGFP	532.57	46	1033.53	5897.4	181.129	F45Y
G33T:T556C	V14L:V189A	amacGFP	782.16	75	1183.55	9278.97	150.965	V11L:V185A
G335T	wt	amacGFP	687.22	46	1238.77	9517.25	161.238	wt
A466T	K159M	amacGFP	682.39	62	1404.9	9052.64	218.029	K155M
G502T	R171L	amacGFP	233.7	18	1080.31	6515.54	179.121	R167L
G33T:T203A	V14L	amacGFP	413.5	33	1056.62	8959.92	124.605	V11L
A6T:G117A:G125T:A370G:A436G:T669C:C701T	K2*:G42S:E127G:N149S:F231L	amacGFP	79.59	4	282.939	600.586	133.294	K2*:G39S:E123G:N145S:F223L
T47C:C110A:A436G	N149S	amacGFP	69.84	7	703.965	3769.2	131.478	N145S
A438T	S150C	amacGFP	551.17	41	1202.57	8649.86	167.192	S146C
G392T:C480T:A496G:C572T:A610G	K134N:K169R:Q210R	amacGFP	160.06	9	1331.29	9969.71	177.771	K130N:K165R:Q203R
A7G:T689A	K2R	amacGFP	72.65	8	1271.16	9692.8	166.707	K2R
A30T:T203A:G564T:A696T	I13F:G192C:M240L	amacGFP	29.03	4	858.904	7389.65	99.8311	I10F:G188C:M232L
A336G:G377A:C605A	K116E:S208R	amacGFP	33.4	4	1881.3	7288.7	485.584	K112E:S201R
T487C	V166A	amacGFP	1013.82	98	1475.44	10521.5	206.901	V162A
G33T:G412A:T452C:A505T:G602T	V14L:G141E:H172L	amacGFP	30.78	6	1784.06	10633.6	299.324	V11L:G137E:H168L
G33T:C137T:C690A:G693T	V14L:H238N:G239C	amacGFP	36.43	2	195.402	9140.13	4.17741	V11L:H230N:G231C
A261T:C341T:G411A	M90L:G141R	amacGFP	142.58	4	406.287	8984.78	18.372	M87L:G137R
G33T:A489G:T647A	V14L:N167D:D223E	amacGFP	64.33	8	1575.56	8462.72	293.331	V11L:N163D:D215E
G33T:T47C:A349T:C690A	V14L:D120V:H238N	amacGFP	55.39	3	1230.62	8593.02	176.238	V11L:D116V:H230N
G33T:T580C:T655A:C677A	V14L:L197P:V226D	amacGFP	26.43	4	1315.39	3755.9	460.672	V11L:L193P:V218D
G33T:G378T	V14L:G130C	amacGFP	281.37	30	1158.53	6397.79	209.79	V11L:G126C
G53A	wt	amacGFP	1249.37	93	1185.9	9204.49	152.789	wt
G33T:A370T	V14L:E127V	amacGFP	1232.67	83	1087.23	9553.2	123.736	V11L:E123V
G33T:C479G	V14L	amacGFP	95.83	12	1408.93	8933.16	222.215	V11L
A154C	K54T	amacGFP	209.78	17	1437.54	8977.58	230.185	K51T
C167A:A709G	Y244C	amacGFP	100.11	4	730.699	8609.91	62.0123	Y236C
A49T	E19V	amacGFP	862.74	52	1638.94	9411.13	285.419	E16V
G33T:T597C	V14L:Y206H	amacGFP	598.57	48	1411.71	9029.35	220.717	V11L:Y199H
G33T:A651T	V14L:M225L	amacGFP	526.51	55	1033.77	3900.92	273.957	V11L:M217L
G399T:T657C	G137C:F227L	amacGFP	41.7	2	1410.66	7365.17	270.185	G133C:F219L
A7T:A241T:A456G:C585A:C630A	K2M:N83I:M156V:P199T:R217S	amacGFP	67.67	7	171.682	1678.98	17.555	K2M:N80I:M152V:P195T:R210S
A13G:C176A:G236A:G258A:A484G:C587A:A610G	E7G:A89T:K165R:Q210R	amacGFP	76.72	6	940.69	10536.2	83.9861	E4G:A86T:K161R:Q203R
G33T:A100G:A201T:A415G:A465G:C644A:T666A	V14L:E36G:I70F:H142R:K159E:F230I	amacGFP	47.8	5	299.519	1130.68	79.3432	V11L:E33G:I67F:H138R:K155E:F222I
A55T	D21V	amacGFP	1125.3	76	1342.99	9720.26	185.553	D18V
G33T:G93A:T450A	V14L:E34K:Y154N	amacGFP	135.67	10	666.989	8014.74	55.507	V11L:E31K:Y150N
G8T:G522T	K2N:G178W	amacGFP	33.23	4	1271.76	9672.04	167.222	K2N:G174W
A7G:A13T:C214T:A301T:A474G:T481C	K2R:E7V:A74V:Q104L:N162D:L164P	amacGFP	32.52	3	35.994	458.457	2.82594	K2R:E4V:A71V:Q100L:N158D:L160P
C104T:G134T:C161T:T608C:A664G	K47N:E229G	amacGFP	105.56	14	68.0666	495.227	9.35541	K44N:E221G
C110T:G422T:T470C:G555A:T641A:G683T	V189I	amacGFP	61.37	3	519.13	8552.51	31.5108	V185I
G128A:A154G:G522A	K54R:G178R	amacGFP	257.69	18	1098.37	9675.32	124.69	K51R:G174R
T204C	wt	amacGFP	2053.87	143	1311.93	9532.91	180.549	wt
G93C:A100G	E34Q:E36G	amacGFP	30.96	5	965.235	8461.12	110.113	E31Q:E33G
G622A:C690A	S214N:H238N	amacGFP	34.07	5	856.177	7373.03	99.4216	S207N:H230N
G33T:A508T	V14L:N173I	amacGFP	690.47	50	827.901	6135.02	111.722	V11L:N169I
G33T:A634T:C690A	V14L:N218I:H238N	amacGFP	31.04	2	750.824	9505.86	59.3041	V11L:N211I:H230N
G682A	G235E	amacGFP	554.15	41	1126.01	9945.6	127.483	G227E
G33T:A505T	V14L:H172L	amacGFP	1455.2	68	2660	14034.1	504.17	V11L:H168L
G29A:T114A:C266A:C531T:A610T:A664G:A691C	Y41N:L181F:Q210L:E229G:H238P	amacGFP	80.85	3	0	449	0	Y38N:L177F:Q203L:E221G:H230P
A628T:C705G	D216V:L243V	amacGFP	86.79	4	1152.72	10912.8	121.762	D209V:L235V
C620T	wt	amacGFP	214.06	25	1651.14	9926.58	274.642	wt
G105C:A313T:C690T	D38H:K108M:H238Y	amacGFP	97.63	6	517.643	7768.11	34.4941	D35H:K104M:H230Y
G33T:G377T:A703T	V14L:K129N:E242V	amacGFP	76.9	4	284.345	8629.84	9.36888	V11L:K125N:E234V
G10A:G33T	G6D:V14L	amacGFP	292.17	35	1475.24	8140.46	267.347	G3D:V11L
A495G:A553T	K169E:N188I	amacGFP	47.6	5	0	449	0	K165E:N184I
G33T:A351T:A430G	V14L:T121S:N147S	amacGFP	183.77	12	1217.77	8881.04	166.982	V11L:T117S:N143S
A106T:G199A:G527C:A621G	D38V:G69D:S214G	amacGFP	52.92	6	39.3238	462.311	3.34486	D35V:G66D:S207G
A261T:T641A	M90L	amacGFP	53.48	4	481.275	10071.7	22.9977	M87L
G33T:A100T	V14L:E36V	amacGFP	954.4	75	1340.31	9553.44	188.04	V11L:E33V
T339C:G570A	F117L:G194S	amacGFP	68.96	4	586.697	7477.75	46.0317	F113L:G190S
G15T	E8*	amacGFP	415.39	26	95.2967	490.711	18.5067	E5*
G33T:A133G	V14L:K47R	amacGFP	1184.28	74	795.563	7778.54	81.3676	V11L:K44R
G33T:A490T	V14L:N167I	amacGFP	296.17	19	1389.28	8509.46	226.819	V11L:N163I
G33T:C56A:G332A:C506T	V14L:D21E	amacGFP	45.34	11	1155.94	8803.26	151.785	V11L:D18E
G33T:C149A:C407G:C617T	V14L:I139M	amacGFP	43.46	6	954.028	7179.27	126.777	V11L:I135M
A67T:C311T	H25L	amacGFP	53.98	4	458.687	7419.78	28.3558	H22L
A375G	K129E	amacGFP	880.79	44	1019.77	9168.78	113.421	K125E
G33T:G54A:A147G:C690A	V14L:D21N:T52A:H238N	amacGFP	26.18	2	181.151	9510.4	3.4505	V11L:D18N:T49A:H230N
A144T:T556C:T580C:C710G	T51S:V189A:L197P:Y244*	amacGFP	109.92	7	1210.26	6938.49	211.104	T48S:V185A:L193P:Y236*
G12T:G284C:C536T:A634T	E7*:E98D:N218I	amacGFP	140.94	7	17.1499	451.037	0.652096	E4*:E94D:N211I
G33T:C137T:C149A:C296A:C317T	V14L:F102L	amacGFP	53.48	4	1057.91	11573.9	96.6977	V11L:F98L
G33T:A582T	V14L:I198F	amacGFP	1832.9	109	1090.23	8286.95	143.43	V11L:I194F
G33T:C260T	V14L	amacGFP	333.89	28	1272	8743.96	185.039	V11L
G395C	E135D	amacGFP	116.11	11	1445.08	8794.01	237.465	E131D
A703T	E242V	amacGFP	924.05	88	1570.68	9324.22	264.585	E234V
G33T:A132G:C287T	V14L:K47E	amacGFP	39.35	7	1208.41	6738.7	216.696	V11L:K44E
G33T:C156T:G524T:A612G:T666C	V14L:T211A:F230L	amacGFP	34.36	4	349.192	2446.69	49.8368	V11L:T204A:F222L
C23T:G33T:A45G	V14L:I18V	amacGFP	45.13	4	449.063	9284.66	21.7194	V11L:I15V
G35A	wt	amacGFP	578.43	46	1321.06	9188.41	189.935	wt
G33T:C152T:C266T:A361G:C692G	V14L:N124S:H238Q	amacGFP	40.2	4	589.663	5014.13	69.3444	V11L:N120S:H230Q
T211G:A634G	F73C:N218S	amacGFP	36.94	2	909.53	8528.25	97.0004	F70C:N211S
C414G	H142D	amacGFP	28.66	2	899.539	8986.97	90.0382	H138D
G33T:T47C	V14L	amacGFP	1270.65	94	1137.03	9178.82	140.85	V11L
G105A:T340A:G396A:T470C:A634G	D38N:F117Y:D136N:N218S	amacGFP	49.79	7	670.807	7631.42	58.9644	D35N:F113Y:D132N:N211S
G33T:G286A:T487C	V14L:R99H:V166A	amacGFP	26.69	3	35.1697	457.999	2.70068	V11L:R95H:V162A
T78A:A319T:C531A:A639G:C690A	F29I:K110M:L181I:T221A:H238N	amacGFP	26.66	4	270.665	8441.82	8.67814	F26I:K106M:L177I:T213A:H230N
G33T:A283T:A529T:T697A	V14L:E98V:Q180L:M240K	amacGFP	34.79	6	872.519	7156.47	106.378	V11L:E94V:Q176L:M232K
A6T:G33T:T79A:C197G:C308T:C584.	K2*:V14L:F29Y:Y68*:I203S:N204T:H205T:Y206T:L207*:S208A:C209V:Q210R:T211Q:A212P:I213S:S214A:D216T:R217V:N218T:E219R:T221L:R222A:D223I:H224T:M225W:V226S:L228W:E229S:F230S:F231L:S232V:A233P:C234V:H236I:T237L:H238T:G239A:M240W:D241T:E242S:L243C:Y244T:K245S	amacGFP	67.38	7	97.3924	524.273	18.0923	K2*:V11L:F26Y:Y65*:I196S:N197T:H198T:Y199T:L200*:S201A:C202V:Q203R:T204Q:A205P:I206S:S207A:D209T:R210V:N211T:E212R:T213L:R214A:D215I:H216T:M217W:V218S:L220W:E221S:F222S:F223L:S224V:A225P:C226V:H228I:T229L:H230T:G231A:M232W:D233T:E234S:L235C:Y236T:K237S
G33T:A138T:A153G:C554T:A568G	V14L:I49F:K54E:D193G	amacGFP	147.36	7	594.589	7401.88	47.7631	V11L:I46F:K51E:D189G
A100T:T457C:G653A	E36V:M156T:M225I	amacGFP	49.4	10	417.408	574.588	303.226	E33V:M152T:M217I
C80T:A112T	D40V	amacGFP	28.74	4	1081.85	8061.54	145.184	D37V
G105T:C290A:A628G:C705T	D38Y:D216G	amacGFP	35.15	6	1294.61	6321.84	265.116	D35Y:D209G
A174G:A337T:T493C	T61A:K116M:F168S	amacGFP	27.63	4	61.6825	482.764	7.88115	T58A:K112M:F164S
G33T:G239T:A385G:G423A:A544T:C688T	V14L:M82I:D132G:E145K:Y185F:T237I	amacGFP	63.73	6	715.8	8288.92	61.8138	V11L:M79I:D128G:E141K:Y181F:T229I
A316T:T493C	Y109F:F168S	amacGFP	54.56	6	55.4436	474.393	6.47984	Y105F:F164S
G33T:C559T	V14L:P190L	amacGFP	322.91	16	903.403	6039.71	135.129	V11L:P186L
C197T:C354A	L122M	amacGFP	36.43	6	791.676	8113.25	77.2502	L118M
A174T:G286A:G384T:C605A	T61S:R99H:D132Y:S208R	amacGFP	46.93	4	220.533	595.741	81.6376	T58S:R95H:D128Y:S201R
C257T:A582T	I198F	amacGFP	80.17	2	95.8156	8594.23	1.06823	I194F
C38T:T457C:A621T	M156T:S214C	amacGFP	59.17	3	425.24	8621.54	20.9741	M152T:S207C
A121T:G158A:G522T:A712G	K43M:G178W:K245R	amacGFP	153.69	12	1059.69	8128.9	138.141	K40M:G174W:K237R
G33T:A508T:G563T:C656G	V14L:N173I:L191F	amacGFP	58.18	5	205.645	4376.91	9.66205	V11L:N169I:L187F
G33T:G468A	V14L:A160T	amacGFP	385.1	27	1146.69	9485.52	138.622	V11L:A156T
T19G:G33T:C59T:A301T:T526A:G581T	L9R:V14L:Q104L:V179E	amacGFP	55.69	5	669.433	6826.17	65.6503	L6R:V11L:Q100L:V175E
T561C:C617T	wt	amacGFP	47.9	8	1350.23	8963.76	203.389	wt
A13T:G99A	E7V:E36K	amacGFP	31.74	3	1146.6	9694.1	135.618	E4V:E33K
G33T:A612G	V14L:T211A	amacGFP	802.19	60	579.381	1817.67	184.677	V11L:T204A
A424G:A541T:A588T	E145G:H184L:I203F	amacGFP	29.06	6	383.373	694.073	211.757	E141G:H180L:I196F
G33T:T583A	V14L:I198N	amacGFP	592.79	50	1231.27	7839.21	193.391	V11L:I194N
G33T:G126A:A133T	V14L:E45K:K47M	amacGFP	46.75	4	1123.99	5417.55	233.197	V11L:E42K:K44M
A94G:C677A	E34G	amacGFP	86.55	4	419.514	7611.12	23.123	E31G
G33T:C161T:T210G:A444T:T580A:A691T	V14L:F73V:N152Y:L197Q:H238L	amacGFP	37.09	2	212.684	9623	4.70065	V11L:F70V:N148Y:L193Q:H230L
C42A:G225A:G333C:A495G	L17M:E78K:V115L:K169E	amacGFP	34.13	2	325.627	5206.73	20.3646	L14M:E75K:V111L:K165E
A147T:A394T:C479T	T52S:E135V	amacGFP	46.52	6	1169.86	8278.5	165.317	T49S:E131V
G33T:C278T	V14L	amacGFP	236.27	32	1813.59	9162.78	358.965	V11L
G33A:A415G	V14M:H142R	amacGFP	86.87	5	1512.8	8294.79	275.904	V11M:H138R
C214T:A403T:C428T	A74V:N138I	amacGFP	35.45	2	118.76	3879.48	3.63552	A71V:N134I
A466G:A614T	K159R	amacGFP	42.81	6	1395.03	8712.46	223.372	K155R
G383T	M131I	amacGFP	529.93	53	1314.66	9302.87	185.785	M127I
A154T	K54M	amacGFP	1300.94	112	1208.94	9243.01	158.124	K51M
A16T:C18T:G33T:T543A:A626G	E8V:V14L:Y185N	amacGFP	94.29	7	846.606	9307.67	77.0055	E5V:V11L:Y181N
G33T:G345A:G410T:A427T:T532C:G563A	V14L:G119S:Y146F:L181P	amacGFP	33.41	3	495.555	7900.21	31.0846	V11L:G115S:Y142F:L177P
A370T:A430T	E127V:N147I	amacGFP	29.32	5	1202.37	8181.6	176.702	E123V:N143I
G60A:A73G:T85C:T210C:T499A	D23N:H27R:V31A:F73L:I170N	amacGFP	26.64	3	1249.93	8225.45	189.939	D20N:H24R:V28A:F70L:I166N
A16T:A183G	E8V:T64A	amacGFP	29.17	6	401.765	1066.76	151.314	E5V:T61A
A651G	M225V	amacGFP	780.24	75	449.087	952.646	211.704	M217V
G33T:C80T:T298A:G524T:A610T:A626G:G682T	V14L:F103Y:Q210L:G235V	amacGFP	104.54	10	973.487	6108.69	155.136	V11L:F99Y:Q203L:G227V
G33T:A394T	V14L:E135V	amacGFP	415.07	34	1190.52	9164.57	154.655	V11L:E131V
T277C:A390G:C455T	I96T:K134E	amacGFP	53.64	5	882.901	8539.13	91.2873	I92T:K130E
G33T:A261T:C533A	V14L:M90L	amacGFP	112.51	10	979.561	8274.41	115.965	V11L:M87L
C137T:A353G:A415T	H142L	amacGFP	72.73	2	491.015	8153.19	29.5707	H138L
A498G:C575T	I170V	amacGFP	51.83	4	1051.81	15709.4	70.4232	I166V
G105T:A237G:G522A	D38Y:M82V:G178R	amacGFP	133.8	4	693.202	8925.94	53.8351	D35Y:M79V:G174R
G239A	M82I	amacGFP	566.24	30	1087.14	9270.87	127.482	M79I
T31C:G33T:T655C	I13T:V14L:V226A	amacGFP	34.56	7	714.679	7784.01	65.6173	I10T:V11L:V218A
A461G:A498G:T532C	I170V:L181P	amacGFP	64.55	5	854.844	16428.5	44.4811	I166V:L177P
C300A:T597C:C690T	Q104K:Y206H:H238Y	amacGFP	91.82	2	285.274	7494.84	10.8583	Q100K:Y199H:H230Y
G410A:G422T:A456C:C690A:A696T	M156L:H238N:M240L	amacGFP	55.33	4	2094.61	10065.3	435.892	M152L:H230N:M232L
A133T	K47M	amacGFP	1959.97	128	1007.22	7568.24	134.047	K44M
T107C	wt	amacGFP	902.04	87	1382.02	9894.87	193.027	wt
C145T:C324T:A424G	T51I:R112C:E145G	amacGFP	56.62	4	552.5	4918.7	62.0603	T48I:R108C:E141G
C311T:A312G:T326C:C692T	K108E	amacGFP	75.52	4	894.007	8977.22	89.0307	K104E
G33T:A696T:T714C	V14L:M240L:*246R	amacGFP	101.48	7	1108.99	9120.78	134.841	V11L:M232L:*238R
G379C:T557C	G130A	amacGFP	44.38	5	1256.83	7750.48	203.809	G126A
G33T:A483G:C690A	V14L:K165E:H238N	amacGFP	140.98	13	721.204	7928.43	65.6038	V11L:K161E:H230N
T247A	F85Y	amacGFP	441.79	37	1416.19	9074.78	221.009	F82Y
A81G	S30G	amacGFP	1957.9	117	1028.01	8925.45	118.403	S27G
G33T:T204C	V14L	amacGFP	855.26	59	1195.49	9089.9	157.228	V11L
G447A	V153I	amacGFP	576.68	61	829.453	7889.68	87.2017	V149I
C83T:G243A	D84N	amacGFP	93.32	6	918.128	7177.52	117.444	D81N
A241G:A430G:A466T:T583C:A610T:A687T:G713A	N83S:N147S:K159M:I198T:Q210L:T237S	amacGFP	69.58	4	205.615	4681.7	9.03037	N80S:N143S:K155M:I194T:Q203L:T229S
G662A	wt	amacGFP	591.09	51	1085.6	9183.67	128.329	wt
G60A:A67G:T277G:G525A:G555A:A592G	D23N:H25R:I96S:V179M:V189I:N204S	amacGFP	30.14	2	1892.3	7988.68	448.237	D20N:H22R:I92S:V175M:V185I:N197S
C74T:A634T:T666C	N218I:F230L	amacGFP	31.17	4	812.327	8273.48	79.7579	N211I:F222L
G345T	G119C	amacGFP	1045.16	73	1093.21	9007.26	132.682	G115C
A73T:C221T	H27L	amacGFP	77.87	12	1311.38	9315.36	184.612	H24L
A129T	I46F	amacGFP	2459.67	165	898.829	7219.02	111.912	I43F
G422T	wt	amacGFP	1353.04	107	1405.98	9374.3	210.872	wt
C644T	wt	amacGFP	641.92	64	1537.67	9389.83	251.807	wt
G142C	C50S	amacGFP	328	20	604.998	8660.33	42.2643	C47S
G33T:C542T:T589A	V14L:I203N	amacGFP	97.94	11	1487.84	8749.18	253.013	V11L:I196N
G33T:G383A	V14L:M131I	amacGFP	443.64	34	982.316	8532.6	113.089	V11L:M127I
C176T:T205C:G345T	L71S:G119C	amacGFP	93.02	10	459.794	1851.89	114.159	L68S:G115C
G33T:C214T	V14L:A74V	amacGFP	757.62	77	1128.44	5313.93	239.631	V11L:A71V
G33T:G396A:T526C:T632C	V14L:D136N:V179A	amacGFP	64.01	5	910.457	6977.53	118.8	V11L:D132N:V175A
G33T:A397T:T670C	V14L:D136V:F231S	amacGFP	46.23	7	299.504	1418.39	63.2427	V11L:D132V:F223S
A231T:A402T:A438G:A592G:A685G	M80L:N138Y:S150G:N204S:H236R	amacGFP	39.29	8	1323.33	6820.49	256.754	M77L:N134Y:S146G:N197S:H228R
A24G:T204A	T11A:L71M	amacGFP	140.46	12	627.139	4859.14	80.9411	T8A:L68M
C296T:A484T	K165M	amacGFP	53.73	8	1341.31	8725.63	206.187	K161M
G33T:G683A	V14L	amacGFP	856.39	67	1218.91	9054.41	164.091	V11L
A366G:C593G:A610T	I126V:N204K:Q210L	amacGFP	107.44	4	721.113	8607.1	60.4157	I122V:N197K:Q203L
A319T:G631T	K110M:R217L	amacGFP	60.13	2	1223.91	10143	147.684	K106M:R210L
A49T:A75G:C140A:C518G:T543C:T667C	E19V:K28E:Y185H:F230S	amacGFP	44.18	5	521.937	7263.84	37.5033	E16V:K25E:Y181H:F222S
A240T:T255A:A313G:A349T	N83Y:S88T:K108R:D120V	amacGFP	147.32	8	520.517	5728.09	47.2998	N80Y:S85T:K104R:D116V
G33T:A552T	V14L:N188Y	amacGFP	723.48	54	99.3149	468.793	21.0401	V11L:N184Y
A231G:T589C	M80V:I203T	amacGFP	26.36	2	85.7319	8401.35	0.874854	M77V:I196T
A6T:G33T:C62T:C89T:T157C:G215T	K2*:V14L:L55P	amacGFP	42.91	2	0	449	0	K2*:V11L:L52P
G33T:A115C	V14L:Y41S	amacGFP	182.69	20	1387.43	8952.18	215.028	V11L:Y38S
G33T:G215T:T382A:A402T	V14L:M131K:N138Y	amacGFP	35.82	6	1084.84	7640.17	154.04	V11L:M127K:N134Y
C110T:C479A:A610G	Q210R	amacGFP	26.33	4	832.501	10805.1	64.1419	Q203R
C5T:A241C	N83T	amacGFP	55.85	4	379.734	6815.49	21.1574	N80T
G33T:A633T	V14L:N218Y	amacGFP	150.86	18	1258.32	9233.6	171.48	V11L:N211Y
G33T:T387A	V14L:F133I	amacGFP	639.42	41	1222.99	8148.59	183.554	V11L:F129I
G33T:G551A:T658A	V14L:F227Y	amacGFP	71.44	6	36.4861	458.737	2.90196	V11L:F219Y
C212A:A226T:C257T:T493A:C640T	F73L:E78V:F168Y:T221I	amacGFP	49.14	4	296.251	2412.67	36.3767	F70L:E75V:F164Y:T213I
G33T:T47C:A127G:A183T:G357A:A366G:G702A	V14L:E45G:T64S:V123M:I126V:E242K	amacGFP	77.75	11	1287.68	8520.34	194.608	V11L:E42G:T61S:V119M:I122V:E234K
A81G:C368T:T481C:A484G:A514T:C690A	S30G:L164P:K165R:E175V:H238N	amacGFP	53.51	5	121.57	554.388	26.6589	S27G:L160P:K161R:E171V:H230N
G8T:A24G:G33T:A343T:A430G:C441G:A552G:A618G:G704A	K2N:T11A:V14L:E118V:N147S:H151D:N188D:I213V	amacGFP	117.53	5	42.1113	462.321	3.83579	K2N:T8A:V11L:E114V:N143S:H147D:N184D:I206V
A269G:T583A	I198N	amacGFP	194.42	13	1518.54	9130.65	252.553	I194N
G314A	wt	amacGFP	564.59	49	1311.97	9556.25	180.12	wt
G335A:T577C	V196A	amacGFP	30.68	3	851.982	9049.01	80.2158	V192A
A67G:A127G	H25R:E45G	amacGFP	30.87	2	878.187	9660.63	79.8305	H22R:E42G
C149A:C386G	D132E	amacGFP	57.33	4	247.453	9341.59	6.55489	D128E
T493C	F168S	amacGFP	767.86	94	157.406	515.304	48.0817	F164S
G286T	R99L	amacGFP	378.04	41	85.3241	498.23	14.6121	R95L
C311T:G477T:T583C	G163C:I198T	amacGFP	88.2	2	730.292	6281.23	84.908	G159C:I194T
T708C	Y244H	amacGFP	614.48	55	1104.17	9245.78	131.865	Y236H
T674C	wt	amacGFP	1045.24	89	1284.46	9509.95	173.486	wt
C109G	A39G	amacGFP	108.43	15	925.086	8298.57	103.124	A36G
A6T:A313T:A471.:C512T:G527C:T697A	K2*:K108M:N161I:N162T:G163A:L164*:K165R:V166*:N167T:F168S:K169R:I170S:R171A:H172T:N173T:I174L:E175R:G176A:G177A:V179S:Q180S:L181S:A182P:D183T:H184T:Y185T:Q186R:T187R:N188T:V189F:L191W:G192A:D193T:G194A:V196C:L197*:I198S:I203S:N204T:H205T:Y206T:L207*:S208A:C209V:Q210R:T211Q:A212P:I213S:S214A:D216T:R217V:N218T:E219R:T221L:R222A:D223I:H224T:M225W:V226S:L228W:E229S:F230S:F231L:S232V:A233P:C234V:H236I…	amacGFP	79.82	7	252.958	514.81	124.294	K2*:K104M:N157I:N158T:G159A:L160*:K161R:V162*:N163T:F164S:K165R:I166S:R167A:H168T:N169T:I170L:E171R:G172A:G173A:V175S:Q176S:L177S:A178P:D179T:H180T:Y181T:Q182R:T183R:N184T:V185F:L187W:G188A:D189T:G190A:V192C:L193*:I194S:I196S:N197T:H198T:Y199T:L200*:S201A:C202V:Q203R:T204Q:A205P:I206S:S207A:D209T:R210V:N211T:E212R:T213L:R214A:D215I:H216T:M217W:V218S:L220W:E221S:F222S:F223L:S224V:A225P:C226V:H228I…
G33T:C176T	V14L	amacGFP	658.98	38	1050.1	9135.95	120.701	V11L
G33T:C257T	V14L	amacGFP	460.08	50	1507.26	9119.92	249.107	V11L
C131A	wt	amacGFP	321.39	27	1390.74	9096.04	212.636	wt
C38A:A626G:T632C	wt	amacGFP	33.47	4	1232.41	10389.5	146.189	wt
G33T:T210C:C354T:C690A	V14L:F73L:H238N	amacGFP	90.44	2	902.73	7120.54	114.446	V11L:F70L:H230N
T31A:T47C:A435T:T532A:G707A	I13N:N149Y:L181H	amacGFP	90.51	5	480.6	3794.57	60.8701	I10N:N145Y:L177H
C51A:C197T	L20M	amacGFP	81.6	6	1190.14	8929.84	158.617	L17M
A13G:A227G:A283T:A319G:A418T:T556C:T669A	E7G:E98V:K110R:K143M:V189A:F231I	amacGFP	27.53	4	723.607	5917.94	88.4779	E4G:E94V:K106R:K139M:V185A:F223I
T661A	L228Q	amacGFP	361.73	54	1576.35	8639.34	287.623	L220Q
G33T:T543C:T714G	V14L:Y185H:*246G	amacGFP	105.58	7	992.779	10769.1	91.5218	V11L:Y181H:*238G
G33T:C42A:A144T:C575A	V14L:L17M:T51S	amacGFP	65.13	8	978.604	8805.39	108.759	V11L:L14M:T48S
G33T:G44T:G191T:A235G:C509T:A633T	V14L:K81R:N218Y	amacGFP	32.79	4	373.384	7727.58	18.0413	V11L:K78R:N211Y
G33T:A276C	V14L:I96L	amacGFP	33.95	5	765.19	8061.49	72.6312	V11L:I92L
G39A:C223A:A227T:G563A:T632A	V16I:P77H:E78D	amacGFP	97.55	9	831.679	6911.46	100.079	V13I:P74H:E75D
G15T:G33T:T580C	E8*:V14L:L197P	amacGFP	408.71	15	13.6237	450.464	0.41203	E5*:V11L:L193P
A7G:G33T:C278T:A495G	K2R:V14L:K169E	amacGFP	41.93	4	357.617	8391.12	15.2411	K2R:V11L:K165E
A183T:G502T	T64S:R171L	amacGFP	82.48	5	316.355	3294.99	30.3736	T61S:R167L
A6T:T107A:T273A:C305T:A436G:G643T	K2*:D38E:Y95N:N149S:R222L	amacGFP	146.87	9	445.973	502.967	395.437	K2*:D35E:Y91N:N145S:R214L
C574A:C690A	P195H:H238N	amacGFP	38.1	5	2020.55	8993.87	453.932	P191H:H230N
G33T:A81T:A301T:A316T:A472G:T632A	V14L:S30C:Q104L:Y109F:N161S	amacGFP	43.93	7	1161.64	6543.69	206.213	V11L:S27C:Q100L:Y105F:N157S
T192C:C540T:C677T	S67P:H184Y	amacGFP	41.97	5	88.3066	459.635	16.9658	S64P:H180Y
G33T:G698T	V14L:M240I	amacGFP	828.76	72	1239.32	9344.11	164.373	V11L:M232I
T195C:C389T:C500A	Y68H	amacGFP	80.7	9	136.018	470.004	39.3632	Y65H
C160A:G233A:T671A	P56H:M80I:F231L	amacGFP	35.35	3	1023.83	5982.44	175.218	P53H:M77I:F223L
T655C	V226A	amacGFP	979.22	104	1384.44	8149.24	235.197	V218A
A538C:C605A	D183A:S208R	amacGFP	27.59	4	1203.07	9870.88	146.63	D179A:S201R
G33T:C380T:C690A	V14L:H238N	amacGFP	41.98	2	49.9894	8732.38	0.286169	V11L:H230N
G33T:C533T:T608G	V14L:C209W	amacGFP	92.64	7	154.457	511.454	46.6456	V11L:C202W
C398T	wt	amacGFP	894.38	84	1310.68	9268.42	185.348	wt
G15T:G33T:G412C	E8*:V14L:G141A	amacGFP	51.69	2	0	449	0	E5*:V11L:G137A
G33T:A453G:G555A	V14L:I155V:V189I	amacGFP	55.5	2	305.969	8126.17	11.5204	V11L:I151V:V185I
T43A:T238A:G282C	L17Q:M82K:E98Q	amacGFP	70.47	7	1353.26	10016.8	182.825	L14Q:M79K:E94Q
C299T	wt	amacGFP	442.52	47	1378.9	8762.19	216.998	wt
G33T:A129T	V14L:I46F	amacGFP	1432.6	94	882.918	6958.63	112.025	V11L:I43F
G33T:C347A:C684A:C690A	V14L:H236N:H238N	amacGFP	30.35	5	1705.81	9454.03	307.783	V11L:H228N:H230N
G413T:A461T:C684T	H236Y	amacGFP	64.04	4	1230.01	8586.35	176.2	H228Y
C596T:C690A	H238N	amacGFP	35.76	5	1557.87	9442.33	257.03	H230N
G33T:A240C:C503A	V14L:N83H	amacGFP	58.95	6	955.115	8877.51	102.759	V11L:N80H
G410T	wt	amacGFP	1044.46	78	1232.16	9770.67	155.385	wt
G33T:A115G:T387C	V14L:Y41C:F133L	amacGFP	36.06	4	1131.68	6811.81	188.012	V11L:Y38C:F129L
G33T:C323T	V14L	amacGFP	399.68	22	1438.47	9346.43	221.387	V11L
G225A:A445G	E78K:N152S	amacGFP	34.86	7	1460	9896.41	215.391	E75K:N148S
T492C:T557C:C575A	F168L	amacGFP	35.93	4	148.586	2568.28	8.59633	F164L
G33T:C644T	V14L	amacGFP	271.22	29	1468.73	9606.34	224.556	V11L
G15A:G33T:G258A	E8K:V14L:A89T	amacGFP	138.3	3	1255.2	10534.4	149.561	E5K:V11L:A86T
C140A:T406A	I139N	amacGFP	48.19	5	553.225	3117.06	98.1878	I135N
A24G:G422T:T433A:T556C	T11A:F148Y:V189A	amacGFP	28.23	2	457.375	7485.45	27.9464	T8A:F144Y:V185A
A6T:G33T:T219C:G422T:T669C	K2*:V14L:Y76H:F231L	amacGFP	44.75	7	38.9085	460.192	3.28965	K2*:V11L:Y73H:F223L
G33T:T526A	V14L:V179E	amacGFP	310.84	35	1302.65	8394.55	202.143	V11L:V175E
A94T	E34V	amacGFP	1532.21	111	769.797	7101.55	83.4448	E31V
G99A:C152T:G399T:A712C	E36K:G137C:K245T	amacGFP	30.59	8	1248.96	6439.15	242.253	E33K:G133C:K237T
T47C:T487C:T562G:T666A	V166A:L191W:F230I	amacGFP	54.71	6	726.349	6885.87	76.6183	V162A:L187W:F222I
A360G:C690A	N124D:H238N	amacGFP	77.58	14	295.375	614.127	142.065	N120D:H230N
G29T:A361G	N124S	amacGFP	39.81	2	390.955	5535.53	27.6118	N120S
G345A	G119S	amacGFP	784.46	56	1106.93	8945.46	136.974	G115S
G33T:G534T	V14L:A182S	amacGFP	714.4	48	718.02	7319.05	70.4399	V11L:A178S
C62T:C200T:A417G:C550T:G653C	K143E:T187M:M225I	amacGFP	35.46	4	414.279	639.7	268.293	K139E:T183M:M217I
A16T:C148A	E8V:T52N	amacGFP	101.48	15	1412.96	8046.52	248.113	E5V:T49N
A30T:G33T:A349G:C605A	I13F:V14L:D120G:S208R	amacGFP	80.14	5	1136.75	8157.25	158.412	I10F:V11L:D116G:S201R
A337G:T669C:A712G	K116R:F231L:K245R	amacGFP	28.85	2	227.593	6902.91	7.50384	K112R:F223L:K237R
G33T:T669C	V14L:F231L	amacGFP	1571.08	89	760.883	7189.94	80.5213	V11L:F223L
G33T:A49T:T195C:A461G	V14L:E19V:Y68H	amacGFP	34.32	4	51.8802	470.549	5.72002	V11L:E16V:Y65H
A115G:A183G:G286A:A618T:A691G:G699A	Y41C:T64A:R99H:I213F:H238R:D241N	amacGFP	36.33	2	0	449	0	Y38C:T61A:R95H:I206F:H230R:D233N
C42A:C479T	L17M	amacGFP	61.69	4	1269.93	9851.01	163.711	L14M
G33T:A592C	V14L:N204T	amacGFP	78.77	9	1006.83	8809.04	115.076	V11L:N197T
G33T:T580C	V14L:L197P	amacGFP	601.53	77	842.684	5712.33	124.313	V11L:L193P
G33.:.35C:A568G:A672T	V14S:D193G:S232C	amacGFP	183.26	10	644.203	8041.67	51.6059	V11S:D189G:S224C
C257T:T295C:A625T	F102S:K215I	amacGFP	44.19	2	16.7901	7735.49	0.0364436	F98S:K208I
A186T:A301G:A687T	T65S:Q104R:T237S	amacGFP	88.54	5	810.613	9291.99	70.7162	T62S:Q100R:T229S
G33T:A183T:G439A:G622A:T678C	V14L:T64S:S150N:S214N:C234R	amacGFP	42.02	5	616.859	6250.4	60.8785	V11L:T61S:S146N:S207N:C226R
G33T:A55C:A241G	V14L:D21A:N83S	amacGFP	27.32	2	717.883	8471.1	60.837	V11L:D18A:N80S
A316T	Y109F	amacGFP	1301.74	130	1315.5	9003.94	192.198	Y105F
G33T:C380T	V14L	amacGFP	344.84	27	1343.41	9114.99	197.997	V11L
C32A:C87T:A115T:T583C	R32C:Y41F:I198T	amacGFP	66.47	7	587.365	7910.97	43.61	R29C:Y38F:I194T
A94G:C113T:C323A:T577A	E34G:V196E	amacGFP	69.29	7	1565.03	5454.16	449.073	E31G:V192E
A268T:T450A:A514C:A625T:A687G	E93V:Y154N:E175A:K215I:T237A	amacGFP	43.11	5	819.996	8946.25	75.1593	E89V:Y150N:E171A:K208I:T229A
T207A:C354A:T434C	C72S:L122M	amacGFP	272.05	16	705.064	6514.82	76.3052	C69S:L118M
C695T	wt	amacGFP	883.59	64	1627.96	10081.4	262.884	wt
G105A:C140A:C212T:C289T	D38N:T100I	amacGFP	103.59	11	696.22	7925.89	61.1568	D35N:T96I
G215T:G329T:A474T:G513C	N162Y:E175Q	amacGFP	136.41	6	879.224	9245.24	83.6144	N158Y:E171Q
A696G	M240V	amacGFP	1057.28	84	1349.8	9853.46	184.907	M232V
G325A	R112H	amacGFP	819.2	44	778.892	8538.66	71.0502	R108H
G33T:A227G	V14L	amacGFP	516.73	35	807.76	9144.48	71.3519	V11L
C293A:T432A:C476G:G513.:.515T:C584T:A634G	F148I:N162K:E175M:N218S	amacGFP	63.72	2	0	449	0	F144I:N158K:E171M:N211S
T124A:C566T	L44Q	amacGFP	32.11	2	221.859	4332.98	11.3597	L41Q
G33T:C386G:A614G	V14L:D132E	amacGFP	159.6	8	1276.87	8762.04	186.074	V11L:D128E
G44A:G63A:C214G	V24I:A74G	amacGFP	36.02	5	1022.57	5762.57	181.454	V21I:A71G
T511C	I174T	amacGFP	1112.74	77	1156.97	8825.24	151.675	I170T
A30G	I13V	amacGFP	604.87	52	1270.61	9054.54	178.303	I10V
G33T:A127T:G447A	V14L:E45V:V153I	amacGFP	30.91	2	82.0454	7231	0.930916	V11L:E42V:V149I
A691T	H238L	amacGFP	735.56	52	1374.01	9271.37	203.629	H230L
T562C	L191S	amacGFP	1143	90	1003.8	8413.96	119.756	L187S
G33T:C688A	V14L:T237N	amacGFP	188.07	15	1041.77	8718.67	124.478	V11L:T229N
G33T:C143T:T706C	V14L:L243P	amacGFP	80.84	8	761.68	9868.23	58.7903	V11L:L235P
C264T	P92S	amacGFP	1078.49	73	806.476	6351.08	102.408	P88S
G33T:G320A:C558T	V14L:P190S	amacGFP	64.9	4	328.774	7652.86	14.1244	V11L:P186S
G33T:C440A	V14L:S150R	amacGFP	112.62	20	2061.87	8454.45	502.847	V11L:S146R
A227T:C389A:C479A:T561A	E78D:F133L:L191M	amacGFP	59.36	7	1934.56	9110.66	410.784	E75D:F129L:L187M
G33T:A183T:A226C:C368A	V14L:T64S:E78A	amacGFP	83.56	6	809.208	8477.81	77.239	V11L:T61S:E75A
G33T:C441A:G537T:G571C:T597C:C599T	V14L:H151N:D183Y:G194A:Y206H	amacGFP	100.36	6	339.589	2582.36	44.6571	V11L:H147N:D179Y:G190A:Y199H
A381T	M131L	amacGFP	1733.54	97	1245.27	8924.6	173.755	M127L
T334C:G485T:C596T:C629A:C684T	V115A:K165N:D216E:H236Y	amacGFP	27.02	7	484.403	1226.9	191.251	V111A:K161N:D209E:H228Y
A229G	H79R	amacGFP	760.15	61	1330.4	9387.86	188.538	H76R
G20T:T107C:C695T	wt	amacGFP	34.19	4	903.618	9842.92	82.9557	wt
A451T	Y154F	amacGFP	481.77	36	1733.31	10337.5	290.626	Y150F
A366G:C518T	I126V	amacGFP	52.37	2	421.323	9741.16	18.223	I122V
G33T:C690G	V14L:H238D	amacGFP	461.77	43	1067.53	9312.85	122.37	V11L:H230D
G523T:C550T:A582G:T641G	G178V:T187M:I198V	amacGFP	27.59	2	722.788	6129.65	85.2286	G174V:T183M:I194V
G33T:A451T:A610T:T647A:G702A	V14L:Y154F:Q210L:D223E:E242K	amacGFP	26.88	2	191.782	6118.41	6.0114	V11L:Y150F:Q203L:D215E:E234K
C278T	wt	amacGFP	720.15	47	1692.83	8849.11	323.837	wt
G39A:A685T	V16I:H236L	amacGFP	90.9	6	1134.12	9467.99	135.851	V13I:H228L
A6T:A201T:A280T:T298A:T686A	K2*:I70F:Q97L:F103Y:H236Q	amacGFP	51.9	5	123.315	514.635	29.5483	K2*:I67F:Q93L:F99Y:H228Q
C265T	P92L	amacGFP	631.74	55	855.144	6445.31	113.458	P88L
G9T:G33T	G6C:V14L	amacGFP	1592.33	95	1091.05	8618.54	138.12	G3C:V11L
T195A:G236A:C311T:G325A:A370T:A456G:A691G	Y68N:R112H:E127V:M156V:H238R	amacGFP	143.39	10	240.394	527.798	109.491	Y65N:R108H:E123V:M152V:H230R
G27A:A220G	G12R:Y76C	amacGFP	35.43	6	340.3	713.267	162.357	G9R:Y73C
T207A:A603C:G694A	C72S:S208R:G239D	amacGFP	36.36	2	786.935	9153.25	67.6553	C69S:S201R:G231D
A312G:A444T	K108E:N152Y	amacGFP	74.97	4	371.51	8127.03	16.9828	K104E:N148Y
G33T:G194A	V14L	amacGFP	626.65	55	1202.33	8634.35	167.424	V11L
G33T:G282A	V14L:E98K	amacGFP	339.39	30	869.591	8363.59	90.4145	V11L:E94K
C545T	wt	amacGFP	662.09	61	1491.75	9304.13	239.176	wt
G105T:T706G	D38Y:L243R	amacGFP	90.16	6	806.143	9125.65	71.2132	D35Y:L235R
C341T:G520T:T714C	G177V:*246R	amacGFP	55.31	2	32.3925	8475.71	0.123798	G173V:*238R
G33T:A614T:C630A	V14L:R217S	amacGFP	78.39	3	279.157	9726.17	8.01224	V11L:R210S
A376T	K129M	amacGFP	1080.48	74	1605.74	9917.6	259.981	K125M
T207A:A319G:G383T	C72S:K110R:M131I	amacGFP	40.36	2	734.715	8516.39	63.3844	C69S:K106R:M127I
G33T:C257T:G346A:C446A	V14L:G119D:N152K	amacGFP	71.85	6	525.954	11635.4	23.7747	V11L:G115D:N148K
C574A	P195H	amacGFP	526.77	41	1181.62	9247.56	150.982	P191H
C224A:A438T:G627T	S150C:D216Y	amacGFP	68.73	7	411.587	7225.51	23.4452	S146C:D209Y
G101T:T387A:C690.:.692T	E36D:F133I:H238I	amacGFP	27.61	5	1311.67	8493.57	202.562	E33D:F129I:H230I
G33T:A403G:C640A	V14L:N138S:T221N	amacGFP	44.02	4	1017.44	7157.68	144.626	V11L:N134S:T213N
A76T	K28M	amacGFP	1879.23	144	1246.4	8983.17	172.936	K25M
G44A:T135A:C566T	F48I	amacGFP	112.6	12	1545.97	10539.1	226.779	F45I
C300A:G364A:T450G:G604A:G638T	Q104K:R125H:Y154D:S208N:E219D	amacGFP	74.64	4	364.5	5372.37	24.7303	Q100K:R121H:Y150D:S201N:E212D
G15T:G142A:A174G:C264A:T298C:G314A:A424T:A529G	E8*:C50Y:T61A:P92T:F103S:E145V:Q180R	amacGFP	106.99	8	40.0907	460.95	3.48686	E5*:C47Y:T58A:P88T:F99S:E141V:Q176R
G33T:G527T:A582T	V14L:I198F	amacGFP	34.35	6	1515.81	8175.19	281.057	V11L:I194F
A81T:A231G:A582G:A664T:T689G	S30C:M80V:I198V:E229V	amacGFP	34.76	2	63.2684	485.36	8.24727	S27C:M77V:I194V:E221V
A94T:C165T:C441A:T697C	E34V:P58S:H151N:M240T	amacGFP	31.93	4	20.9906	452.073	0.974632	E31V:P55S:H147N:M232T
G93A:G254A:C443A:C455A:T487C:A691T	E34K:H151Q:V166A:H238L	amacGFP	41.97	4	277.886	2613.51	29.5468	E31K:H147Q:V162A:H230L
A301T:G519T:G683A	Q104L:G177C	amacGFP	82.63	6	1621.81	6810.41	386.213	Q100L:G173C
G33T:C83A:C188A:T543C	V14L:S30R:Y185H	amacGFP	50.08	10	1752.51	8425.2	364.535	V11L:S27R:Y181H
A349C:T666C:T678C:C690A	D120A:F230L:C234R:H238N	amacGFP	28.9	2	130.618	8079.22	2.11171	D116A:F222L:C226R:H230N
G33C:G422T	V14L	amacGFP	79.05	7	1138	9096.31	142.371	V11L
T31C:G99A	I13T:E36K	amacGFP	56.94	6	738.809	7889.04	69.1895	I10T:E33K
G33T:A418G:G673C	V14L:K143R:S232T	amacGFP	65.71	5	822.615	10064.6	67.2356	V11L:K139R:S224T
A337G	K116R	amacGFP	1551.43	107	1250.03	9293.27	168.14	K112R
C176A	wt	amacGFP	790.89	65	1142.31	9320.88	139.994	wt
A624G	K215E	amacGFP	299.3	20	1959.6	9524.88	403.157	K208E
A331T:C420A:T492G:A685G	E114V:L144M:F168V:H236R	amacGFP	32.08	7	380.973	1474.66	98.423	E110V:L140M:F164V:H228R
G33T:A73T:T487C:G563T	V14L:H27L:V166A:L191F	amacGFP	178.3	6	632.197	9054.08	44.1429	V11L:H24L:V162A:L187F
A288T:A319T:G357C:C579T	T100S:K110M:V123L	amacGFP	32.35	2	329.029	9074.51	11.9301	T96S:K106M:V119L
A337G:G411T:C449A	K116R:G141W	amacGFP	99.93	6	1127.2	8069.51	157.455	K112R:G137W
C242T:A319G	K110R	amacGFP	110.71	9	1248.76	8756.73	178.08	K106R
T358C	V123A	amacGFP	1546.01	132	1210.36	8370.17	175.024	V119A
T21A:C188A	F10I	amacGFP	82.07	6	712.56	8028.53	63.2421	F7I
G33T:G345T	V14L:G119C	amacGFP	1512.88	119	1226.78	8508.72	176.875	V11L:G115C
T298A	F103Y	amacGFP	517.85	66	1424.05	8032.52	252.465	F99Y
G29A:G33T:T295C:A651T	V14L:F102S:M225L	amacGFP	53.47	9	696.875	1809.48	268.383	V11L:F98S:M217L
G111A:A475T:T706C	D40N:N162I:L243P	amacGFP	88.52	3	848.588	8793.46	81.8907	D37N:N158I:L235P
G39A:G158A:G335A:T382C:A508T	V16I:M131T:N173I	amacGFP	88.63	4	1167.26	6088.87	223.767	V13I:M127T:N169I
C62T	wt	amacGFP	508.73	56	1468.88	9453.76	228.227	wt
A61C	D23A	amacGFP	450.32	26	863.64	8618.31	86.5452	D20A
A588G:C605T	I203V	amacGFP	156.65	8	810.616	9338.78	70.3623	I196V
G33T:T487C:C521T:T526G	V14L:V166A:V179G	amacGFP	27.66	7	1323.82	5895.5	297.259	V11L:V162A:V175G
G33T:A319T	V14L:K110M	amacGFP	715.74	71	1481.53	8575.57	255.952	V11L:K106M
G33T:C159T:T457C:A598G	V14L:P56S:M156T:Y206C	amacGFP	35.61	6	1604.31	5804.03	443.451	V11L:P53S:M152T:Y199C
G33T:G54T	V14L:D21Y	amacGFP	1669.25	76	869.177	8680.56	87.0301	V11L:D18Y
A133T:C512A	K47M	amacGFP	27.11	4	1195.17	6888.72	207.356	K44M
T532A:T647A:C692A	L181H:D223E:H238Q	amacGFP	26.1	4	794.728	9899.75	63.7989	L177H:D215E:H230Q
A183T:G392T:A438T:G462A	T64S:K134N:S150C:D158N	amacGFP	85.89	4	570.082	7208.61	45.0841	T61S:K130N:S146C:D154N
G33T:A337G:A544G:T580A:T671A	V14L:K116R:Y185C:L197Q:F231L	amacGFP	29.01	2	55.8162	7220.29	0.431485	V11L:K112R:Y181C:L193Q:F223L
A227T:T657A	E78D:F227I	amacGFP	267.5	11	1006.72	12059.6	84.0394	E75D:F219I
G33T:G93C:C401T	V14L:E34Q	amacGFP	48.15	10	1675.24	7612.88	368.644	V11L:E31Q
T40A:C116A:A227T:T298C:A336T:A370T:T457C:C540T	V16D:Y41*:E78D:F103S:K116*:E127V:M156T:H184Y	amacGFP	54.38	4	179.12	616.583	52.0351	V13D:Y38*:E75D:F99S:K112*:E123V:M152T:H180Y
G399T	G137C	amacGFP	1301.81	82	822.423	8184.99	82.6367	G133C
G33T:T195C:A436G:A700G	V14L:Y68H:N149S:D241G	amacGFP	66.17	2	64.8178	636.997	6.59556	V11L:Y65H:N145S:D233G
A510G:G607A:A664T	I174V:C209Y:E229V	amacGFP	26.7	3	53.2173	471.928	6.00109	I170V:C202Y:E221V
G33T:A138T:C362G:T382A:T457C	V14L:I49F:N124K:M131K:M156T	amacGFP	26.95	5	502.574	1048.33	240.937	V11L:I46F:N120K:M127K:M152T
T34C:C167A	V14A	amacGFP	89.33	4	1203.99	8170.53	177.418	V11A
G33T:A288T	V14L:T100S	amacGFP	938.13	64	1026.75	9087.39	116.009	V11L:T96S
C110T	wt	amacGFP	1332.74	94	1146.1	9535.9	137.747	wt
C644T:A672T	S232C	amacGFP	117.78	5	868.378	9011.98	83.6752	S224C
G33T:C71G:A231T	V14L:M80L	amacGFP	34.6	3	782.632	8274.97	74.0201	V11L:M77L
G33T:A229T:G357C:G482C:C579T:T674C:C690A	V14L:H79L:V123L:H238N	amacGFP	50	5	591.947	5988.63	58.5112	V11L:H76L:V119L:H230N
A154T:C635A	K54M:N218K	amacGFP	59.06	4	1256.41	9573.6	164.886	K51M:N211K
G33T:G523T	V14L:G178V	amacGFP	1222.57	72	1379.42	10385.6	183.216	V11L:G174V
A61T	D23V	amacGFP	755.9	55	1416.19	9277.64	216.176	D20V
T21C	F10L	amacGFP	1269.23	97	1204.39	8647.15	167.748	F7L
G33T:A703G	V14L:E242G	amacGFP	459.1	60	1455.1	8827.15	239.864	V11L:E234G
A274G	Y95C	amacGFP	677.93	66	566.97	626.453	513.135	Y91C
G33T:C386A	V14L:D132E	amacGFP	115.78	14	1585.57	8533.81	294.596	V11L:D128E
A456T:G467T:G707A	M156L:K159N	amacGFP	230.54	15	705.302	9077.54	54.8001	M152L:K155N
G225A	E78K	amacGFP	625.92	55	1269.94	9193.77	175.417	E75K
T674A	S232R	amacGFP	685.22	71	1872.4	10675.8	328.396	S224R
G328C:G522T	G113A:G178W	amacGFP	143.29	7	1326.19	9167.31	191.852	G109A:G174W
A288T	T100S	amacGFP	855.36	58	1255.41	9115.92	172.891	T96S
G33T:A240G	V14L:N83D	amacGFP	589.55	48	971.533	9158.5	103.06	V11L:N80D
G15T:T52G:A81G:T163A:T202C:A268G:C533A	E8*:L20R:S30G:V57E:I70T:E93G	amacGFP	26.5	4	228.339	640.81	81.3641	E5*:L17R:S27G:V54E:I67T:E89G
G33T:C368A	V14L	amacGFP	330.02	20	1032.14	9278.57	114.814	V11L
G33T:G332T	V14L:E114D	amacGFP	1109.32	73	755.26	7640.83	74.6538	V11L:E110D
C38A:G607A:A634G:T678A	C209Y:N218S:C234S	amacGFP	67.82	6	240.644	2599.4	22.2781	C202Y:N211S:C226S
C197T:T543A:T556C:A700G	Y185N:V189A:D241G	amacGFP	81.66	8	1927.08	10045.9	369.666	Y181N:V185A:D233G
G33T:G411A	V14L:G141R	amacGFP	750.53	66	1508.87	8678.27	262.342	V11L:G137R
C23A:C42T:A435T:C533A:A591T	F10L:N149Y:N204Y	amacGFP	38.53	2	429.504	2728.07	67.6206	F7L:N145Y:N197Y
G33T:G99A	V14L:E36K	amacGFP	434.89	36	1418.26	9598.02	209.571	V11L:E33K
A489G:C690A	N167D:H238N	amacGFP	128.8	13	1403.57	8281.83	237.871	N163D:H230N
G477T:A514G:G682T:A709C	G163C:E175G:G235V:Y244S	amacGFP	98.56	6	675.421	7325.68	62.2731	G159C:E171G:G227V:Y236S
G33T:T107C:G439T:C605A:G682T	V14L:S150I:S208R:G235V	amacGFP	110.6	9	881.853	7054.92	110.23	V11L:S146I:S201R:G227V
G33T:T295C:A444T:A475T	V14L:F102S:N152Y:N162I	amacGFP	26.66	5	1746.61	7631.25	399.759	V11L:F98S:N148Y:N158I
A3G:G33T:T589A	S1G:V14L:I203N	amacGFP	50.76	2	325.127	8172.29	12.9349	S1G:V11L:I196N
G604A	S208N	amacGFP	488.17	33	1004.75	8658.63	116.592	S201N
C368T	wt	amacGFP	635.91	33	980.565	9435.3	101.905	wt
C184G	T64S	amacGFP	96.18	6	1438.21	9001.26	229.795	T61S
G33T:A316T:G551A:G638T	V14L:Y109F:E219D	amacGFP	39.15	2	1245.18	6219.61	249.289	V11L:Y105F:E212D
G33T:G462A	V14L:D158N	amacGFP	571.44	36	1327.6	8994.56	195.953	V11L:D154N
T561A	L191M	amacGFP	992.18	85	1341.06	9056.28	198.586	L187M
C41A:G44T:T141A:A484G:A639G	C50S:K165R:T221A	amacGFP	34.12	2	568.016	9152.64	35.2512	C47S:K161R:T213A
G33T:G88A	V14L:R32H	amacGFP	177.12	17	1306.81	8371.85	203.988	V11L:R29H
C660T:T689C	wt	amacGFP	59.38	4	704.368	9215.95	53.8344	wt
A6T:G33T:T46A:C161A:G357A:A381T:A651T:T657A:T708A	K2*:V14L:I18N:V123M:M131L:M225L:F227I:Y244N	amacGFP	35.87	4	35.4363	458.146	2.74089	K2*:V11L:I15N:V119M:M127L:M217L:F219I:Y236N
A49T:A444G:A466T:T647C	E19V:N152D:K159M	amacGFP	97.87	11	1089.54	7355.67	161.385	E16V:N148D:K155M
C25T:C248T:G329C:A397G:T583A	T11I:D136G:I198N	amacGFP	127.79	8	402.534	8228.09	19.6928	T8I:D132G:I194N
G33T:A241T:A626G:G693T	V14L:N83I:G239C	amacGFP	48.2	4	152.492	4832.52	4.81195	V11L:N80I:G231C
T124A:A154T	L44Q:K54M	amacGFP	65.24	6	722.805	4010.48	130.27	L41Q:K51M
A67T:T532A	H25L:L181H	amacGFP	83.97	8	1479.38	9906.55	220.92	H22L:L177H
A7T:T107C:A268G:A461T	K2M:E93G	amacGFP	31.17	4	808.408	8534.58	76.5736	K2M:E89G
G33T:C245T:C248T	V14L	amacGFP	39.77	5	856.046	7943.43	92.2541	V11L
G33T:A49G	V14L:E19G	amacGFP	606.85	79	1656.88	6500.72	422.3	V11L:E16G
T195C:A268G:A351T:G458A:G527A:A553G:G581T:C587A	Y68H:E93G:T121S:M156I:N188S	amacGFP	49.65	5	311.503	585.114	165.838	Y65H:E89G:T117S:M152I:N184S
C285T:G527A:T580C	R99C:L197P	amacGFP	45.25	8	65.776	526.232	8.22162	R95C:L193P
A438T:A445T	S150C:N152I	amacGFP	48.45	6	991.022	12094.4	81.205	S146C:N148I
G33T:A49T:G128A:A288G:T561A:T670C	V14L:E19V:T100A:L191M:F231S	amacGFP	42.67	9	1021.71	2857.8	365.28	V11L:E16V:T96A:L187M:F223S
G33T:T181C	V14L:V63A	amacGFP	1570.83	127	466.149	3190.58	68.1051	V11L:V60A
G33T:A588T	V14L:I203F	amacGFP	411.81	36	1197.72	8990.75	159.556	V11L:I196F
G33T:C59T:A81G:C536T	V14L:S30G	amacGFP	30.6	2	181.122	8135.8	4.03218	V11L:S27G
G33T:G284A:A415T:T452C	V14L:H142L	amacGFP	42.96	4	1588.17	7897.1	319.392	V11L:H138L
A30G:A489T:T543C	I13V:N167Y:Y185H	amacGFP	98.82	7	952.772	9591.83	94.6404	I10V:N163Y:Y181H
C362T:T659A	F227L	amacGFP	160.2	12	2151.89	12187.6	379.945	F219L
T22A:G33T	F10Y:V14L	amacGFP	274.24	31	1269.44	3900.53	413.14	F7Y:V11L
A241G:C407T:T561A	N83S:L191M	amacGFP	87.43	5	611.645	8790.71	42.5574	N80S:L187M
A24G:G33T:G236T	T11A:V14L:K81N	amacGFP	72.94	4	723.32	7265.21	72.0132	T8A:V11L:K78N
G39A:A336G:A349G:G662T	V16I:K116E:D120G	amacGFP	93.33	3	354.804	7758.94	16.2246	V13I:K112E:D116G
G33T:A55G:T238A	V14L:D21G:M82K	amacGFP	86.99	8	923.47	7395.66	115.311	V11L:D18G:M79K
G348A:A621T	D120N:S214C	amacGFP	131.82	7	805.501	8654.1	74.9738	D116N:S207C
G33T:G108C:C285T:C323A:A351G:C690A	V14L:A39P:R99C:T121A:H238N	amacGFP	64.66	5	300.3	667.767	135.047	V11L:A36P:R95C:T117A:H230N
A73G:A261T:C299T:A301G:G517A	H27R:M90L:Q104R:G176D	amacGFP	144.33	2	160.467	12415.3	2.07403	H24R:M87L:Q100R:G172D
G29T:C469A	A160D	amacGFP	33.76	5	1142.01	9441.91	138.128	A156D
A453G:A610G	I155V:Q210R	amacGFP	65.98	10	1475.3	9749.94	223.233	I151V:Q203R
G33T:A370G:T647C	V14L:E127G	amacGFP	41.79	6	1143.39	8523.43	153.382	V11L:E123G
G33T:T457A:C476T	V14L:M156K	amacGFP	222.75	20	1076.42	9088.19	127.493	V11L:M152K
G33T:T277C:C613T:G654A:C692G	V14L:I96T:T211I:V226I:H238Q	amacGFP	35.46	4	496.488	695.487	354.428	V11L:I92T:T204I:V218I:H230Q
T47C:G48A:G419A	E19K	amacGFP	32.4	4	1438.3	8833.55	234.187	E16K
G33T:C629T:T670C	V14L:F231S	amacGFP	46.85	7	291.661	1375.34	61.8513	V11L:F223S
G33T:A316T:G399A:G425C:A489T:A610G:C644T	V14L:Y109F:G137S:E145D:N167Y:Q210R	amacGFP	94.42	8	293.288	2354.81	36.5286	V11L:Y105F:G133S:E141D:N163Y:Q203R
A240T:G571C:T689A	N83Y:G194A	amacGFP	109.28	10	1213.81	9655.2	152.595	N80Y:G190A
G194A:G346A	G119D	amacGFP	30.62	2	880.017	9096.13	85.1384	G115D
G33T:C51T:C98T:A183G:A544T	V14L:T64A:Y185F	amacGFP	48.96	9	361.371	2156.58	60.5537	V11L:T61A:Y181F
T195A:A316G:G439A	Y68N:Y109C:S150N	amacGFP	68.81	4	30.7388	456.286	2.07079	Y65N:Y105C:S146N
C257T:C368T	wt	amacGFP	54.78	2	3.98581	10114	0.00157077	wt
G33T:C218A	V14L	amacGFP	322.67	25	1267.23	8859.6	181.259	V11L
C51A:C416T:A427T:C440T	L20M:Y146F	amacGFP	70.82	6	1901.08	9274.68	389.674	L17M:Y142F
A244C:A461G	D84A	amacGFP	37.8	4	151.199	1178.83	19.3931	D81A
C479T	wt	amacGFP	434.7	45	1454.44	9934.17	212.942	wt
C11T:A435T:G602A	N149Y	amacGFP	32.37	2	441.266	3425.22	56.8476	N145Y
C228T:C416T:T493C:T583C	H79Y:F168S:I198T	amacGFP	109.88	6	0	449	0	H76Y:F164S:I194T
G14A:G33T:C380T:A451T:T557C	V14L:Y154F	amacGFP	39.73	2	89.1373	8351.11	0.951425	V11L:Y150F
G117A:G615T:C676T	G42S:A212S:A233V	amacGFP	87.88	9	1019.39	9571.94	108.563	G39S:A205S:A225V
G329T:G523T	G178V	amacGFP	56.94	4	950.018	12305.8	73.3418	G174V
G675C	A233P	amacGFP	85.02	8	545.832	3014.88	98.8208	A225P
A366G:T669C	I126V:F231L	amacGFP	36.53	2	622.168	8814.99	43.913	I122V:F223L
A65C:A466C:T492C:C540T:C642T:G653T	K159T:F168L:H184Y:R222C:M225I	amacGFP	55.78	7	268.334	684.731	105.155	K155T:F164L:H180Y:R214C:M217I
A229T:A301G	H79L:Q104R	amacGFP	36.49	2	243.462	10203.8	5.809	H76L:Q100R
G33T:C92T:C173T:T557A:C660T	V14L	amacGFP	67.36	2	908.143	9293.58	88.7413	V11L
A45G:T597A	I18V:Y206N	amacGFP	35.18	5	794.712	9729.98	64.9094	I15V:Y199N
G33T:C149T:T543A:G571A	V14L:Y185N:G194D	amacGFP	31.2	4	712.933	9132.11	55.6578	V11L:Y181N:G190D
G33T:A343G	V14L:E118G	amacGFP	1122.76	127	1202.32	7460.83	193.755	V11L:E114G
A633T	N218Y	amacGFP	1429.16	85	1634.92	9440.44	283.14	N211Y
G33T:A106G:A313T:C317T	V14L:D38G:K108M	amacGFP	40.3	3	1243.58	5755.94	268.679	V11L:D35G:K104M
G33T:G233T	V14L:M80I	amacGFP	450.66	27	914.493	8387.15	99.7117	V11L:M77I
G236A	wt	amacGFP	376.24	26	1081.75	9045.85	129.362	wt
A6T:G33T:A394G:A436G:C558A:T669C	K2*:V14L:E135G:N149S:P190T:F231L	amacGFP	59.48	4	73.0866	517.72	10.3177	K2*:V11L:E131G:N145S:P186T:F223L
G377T:G379T	K129N:G130V	amacGFP	88.96	5	247.55	6293.86	9.73664	K125N:G126V
G33T:A353T:T706C	V14L:L243P	amacGFP	85.65	6	1028.26	9502.66	111.265	V11L:L235P
G33T:C56A:A313T:C476A:T680C	V14L:D21E:K108M:N162K	amacGFP	41.88	3	578.105	9889.85	33.7928	V11L:D18E:K104M:N158K
A405G:T708A	I139V:Y244N	amacGFP	32.85	8	2106.34	10027.1	442.468	I135V:Y236N
A313T:C420T:G679T	K108M:C234F	amacGFP	44.81	4	342.872	7889.2	14.9016	K104M:C226F
G33T:A269T	V14L:E93D	amacGFP	782.24	48	1028.71	9265.88	114.21	V11L:E89D
G377T:G410T:A588T:G694C	K129N:I203F:G239A	amacGFP	55.52	4	497.064	9103.85	27.1394	K125N:I196F:G231A
G516A:A544T:C695T	G176S:Y185F	amacGFP	63.82	2	185.471	9842.62	3.49497	G172S:Y181F
T706A	L243Q	amacGFP	861.6	85	1236.36	9736.86	156.989	L235Q
A241T:C469A:C573A	N83I:A160D:P195T	amacGFP	61.8	6	451.099	3491.66	58.279	N80I:A156D:P191T
G33T:A76T:C245T:T382C:C540A:G604A:C690A	V14L:K28M:M131T:H184N:S208N:H238N	amacGFP	46.15	2	201.673	5607.92	7.25259	V11L:K25M:M127T:H180N:S201N:H230N
G33T:A127G:A241G:A703G	V14L:E45G:N83S:E242G	amacGFP	118	6	915.755	8761.33	95.7168	V11L:E42G:N80S:E234G
G9C	G6R	amacGFP	52.25	6	1201.54	8642.62	167.043	G3R
A144T:T499C:G502T:G530A:A591G:A592T:G654A	T51S:I170T:R171L:N204V:V226I	amacGFP	26.06	2	279.702	11709.7	6.68109	T48S:I166T:R167L:N197V:V218I
A121G:C690A	K43R:H238N	amacGFP	106.95	9	1586.36	9086.3	276.961	K40R:H230N
C184A:A319T:A381G:A568G	T64N:K110M:M131V:D193G	amacGFP	56.93	7	71.6434	507.086	10.1221	T61N:K106M:M127V:D189G
C177T	L62F	amacGFP	104.89	12	472.858	2846.79	78.5429	L59F
A7G:G33T:T697A	K2R:V14L:M240K	amacGFP	30.54	4	1242.16	8666.06	178.046	K2R:V11L:M232K
G33T:A429G:C536A:A634T	V14L:N147D:N218I	amacGFP	90.82	6	891.936	7970.2	99.8156	V11L:N143D:N211I
C18T:A229G:G413T:T492A	H79R:F168I	amacGFP	34.83	2	159.906	4535.95	5.63719	H76R:F164I
C146T:A153C:A466T:C690A	K54Q:K159M:H238N	amacGFP	75.05	2	1.50723	10063.1	0.000225749	K51Q:K155M:H230N
G82T:A625T	S30I:K215I	amacGFP	123.55	5	459.148	8344.61	25.2638	S27I:K208I
G33T:C408A:A444T:A456T:G502A:T556C:A591G:C593T	V14L:L140M:N152Y:M156L:R171H:V189A:N204D	amacGFP	89.82	7	582.561	5461.59	62.139	V11L:L136M:N148Y:M152L:R167H:V185A:N197D
A483G:C573A:C690A	K165E:P195T:H238N	amacGFP	33.38	2	999.359	9418.73	106.035	K161E:P191T:H230N
G33T:T294C:A489G	V14L:F102L:N167D	amacGFP	45.3	2	918.148	8636.81	97.605	V11L:F98L:N163D
G33T:C146A	V14L	amacGFP	212.17	17	1208.4	9046.6	161.411	V11L
G70A:T339A:A375G:C401T	G26D:F117I:K129E	amacGFP	29.44	6	1448.11	6509.48	322.149	G23D:F113I:K125E
G488A:A625T	K215I	amacGFP	99.6	7	1192.34	9147.37	155.419	K208I
G342A	E118K	amacGFP	1105.97	87	1014.05	8960.95	114.754	E114K
A261T	M90L	amacGFP	896.6	58	1105.18	9539.6	128.038	M87L
C566T	wt	amacGFP	1080.75	76	1263.12	9222.96	172.989	wt
G17A:G33T:G281T:A385G:C533T:C554T:T659A:C701T	V14L:Q97H:D132G:F227L	amacGFP	117.25	5	0	449	0	V11L:Q93H:D128G:F219L
A424T:G564T	E145V:G192C	amacGFP	35.11	3	942.54	8071.55	110.063	E141V:G188C
G33T:G399T	V14L:G137C	amacGFP	381.76	63	1666.4	7105.99	390.781	V11L:G133C
A121T	K43M	amacGFP	1114.25	84	1110.49	8278.41	148.964	K40M
T157C:T556C	L55P:V189A	amacGFP	70.58	7	1601.6	10716.3	239.369	L52P:V185A
G33T:A466T:C593T	V14L:K159M	amacGFP	28.94	5	734.727	8410.02	64.1882	V11L:K155M
G4A:G33T:A45G:A313T	S1N:V14L:I18V:K108M	amacGFP	72.37	4	770.718	8995.56	66.0334	S1N:V11L:I15V:K104M
G27T:G33T:T473C	G12W:V14L	amacGFP	36	7	1697.78	7111.19	405.34	G9W:V11L
G33T:A45G:G86A:C171A	V14L:I18V:P60T	amacGFP	136	9	843.902	8201.56	86.8336	V11L:I15V:P57T
T19A:G33T:G44T:A81G:G303T:T382C:T470C	L9Q:V14L:S30G:D105Y:M131T	amacGFP	32.26	5	1616.54	6088.11	429.229	L6Q:V11L:S27G:D101Y:M127T
A81G:A153G:C299T:T450C	S30G:K54E:Y154H	amacGFP	43.87	5	941.866	8322.67	106.59	S27G:K51E:Y150H
A6.:G35T:T204C:T557C	K2R:G6A:E7R:E8S:L9C:F10S:T11P:I13S:V14F:V16S:L17*:I18L:E19S:L20W:D21T:G22A:D23T:V24Y:H25T:G26A:H27T:K28S:F29S:S30A:V31C:R32A:G33A:E34R:G35A:E36R:G37A:D38M:A39P:D40T:Y41T:G42A:K43S:L44W:E45R:I46S:K47S:F48S:I49S:C50A:T51P:T52P:G53A:K54S:L55C:V57C:W59G:T61P:L62S:V63*:T64P:T65P:L66C:S67R:Y68T:G69A:I70F:L71C:C72A:F73S:A74R:R75A:Y76T:E78N:H79T:M80*:K81R:M82*:N83T:D84T:F85S:F86S:K87S:S88P:A89P:M90C:E93K…	amacGFP	64.51	10	283.302	626.948	128.017	K2R:G3A:E4R:E5S:L6C:F7S:T8P:I10S:V11F:V13S:L14*:I15L:E16S:L17W:D18T:G19A:D20T:V21Y:H22T:G23A:H24T:K25S:F26S:S27A:V28C:R29A:G30A:E31R:G32A:E33R:G34A:D35M:A36P:D37T:Y38T:G39A:K40S:L41W:E42R:I43S:K44S:F45S:I46S:C47A:T48P:T49P:G50A:K51S:L52C:V54C:W56G:T58P:L59S:V60*:T61P:T62P:L63C:S64R:Y65T:G66A:I67F:L68C:C69A:F70S:A71R:R72A:Y73T:E75N:H76T:M77*:K78R:M79*:N80T:D81T:F82S:F83S:K84S:S85P:A86P:M87C:E89K:G…
G33T:C110A:T114C:C690A	V14L:Y41H:H238N	amacGFP	76.59	5	792.033	9404.26	66.7056	V11L:Y38H:H230N
A129G:T204C:A229G:G281T	I46V:H79R:Q97H	amacGFP	50.51	6	68.7805	497.102	9.51669	I43V:H76R:Q93H
A614G	wt	amacGFP	1262.24	92	1297.85	9172.1	183.645	wt
G33T:A186T	V14L:T65S	amacGFP	871.71	63	1261.66	10746	148.128	V11L:T62S
C266A	wt	amacGFP	338.05	24	1066.79	9866.37	115.345	wt
G284T	E98D	amacGFP	648.61	28	703.466	8497.52	58.2363	E94D
G33T:T382C:G563T	V14L:M131T:L191F	amacGFP	127.96	8	706.212	7972.98	62.5531	V11L:M127T:L187F
A144T:C701T	T51S	amacGFP	110.47	6	578.612	8500.42	39.3852	T48S
G33T:T192A	V14L:S67T	amacGFP	116.53	20	799.497	4232.98	151.004	V11L:S64T
G180A:A316T:G694A	V63M:Y109F:G239D	amacGFP	36.98	4	520.784	609.585	444.918	V60M:Y105F:G231D
A430G:A651T	N147S:M225L	amacGFP	47.38	4	241.048	6222.55	9.33769	N143S:M217L
G20A:T47C:G84A:G329C:G555A:G576A:A664T	V31M:V189I:V196M:E229V	amacGFP	42.48	10	43.1522	463.066	4.02127	V28M:V185I:V192M:E221V
G33T:G702A	V14L:E242K	amacGFP	560.09	54	1418.56	9542.79	210.872	V11L:E234K
G33.:.35C:C245T:G551A	V14S	amacGFP	27.67	2	1390.8	8956.49	215.97	V11S
G151A:A174T:A394T	G53D:T61S:E135V	amacGFP	47.09	8	1307.14	7242.31	235.923	G50D:T58S:E131V
G33T:G108T:C214T	V14L:A39S:A74V	amacGFP	67.45	7	378.083	3704.93	38.5828	V11L:A36S:A71V
C11T:G54A:C156A:G215A:A461T	D21N:L55M	amacGFP	109.05	4	963.509	8835.3	105.073	D18N:L52M
G96T:A463G:C506T:C566T:T657C	G35C:D158G:F227L	amacGFP	62.62	7	565.2	1063.26	300.445	G32C:D154G:F219L
G33T:A235T:C554T	V14L:K81M	amacGFP	122.72	15	912.717	7826.94	106.434	V11L:K78M
A301G:C690A	Q104R:H238N	amacGFP	233.14	8	1146.89	10909.2	120.573	Q100R:H230N
T19A:G33T:A349T:A438T:T580G	L9Q:V14L:D120V:S150C:L197R	amacGFP	40.47	5	833.782	4968.61	139.917	L6Q:V11L:D116V:S146C:L193R
G33T:C74T:G411A:C575G:T666A:G679A:T697C	V14L:G141R:F230I:C234Y:M240T	amacGFP	119.24	9	537.873	6236.73	46.3876	V11L:G137R:F222I:C226Y:M232T
A274T:C354T:T448C:C594T:A612G	Y95F:V153A:H205Y:T211A	amacGFP	94.16	8	53.8441	482.058	6.01418	Y91F:V149A:H198Y:T204A
G33T:A637T	V14L:E219V	amacGFP	293.46	38	1499.27	7218.79	311.384	V11L:E212V
A417G	K143E	amacGFP	493.98	38	1334.06	8578.17	207.469	K139E
T358C:G462A:A507G:A514G:C540T:A541G:C690A	V123A:D158N:N173D:E175G:H184C:H238N	amacGFP	28.85	3	0	449	0	V119A:D154N:N169D:E171G:H180C:H230N
G4A:G86A:A268G:A489G	S1N:E93G:N167D	amacGFP	177.56	10	884.307	8348.43	93.6702	S1N:E89G:N163D
C59A:A186T	T65S	amacGFP	52.28	2	58.0266	11087.6	0.30368	T62S
G27.:T34C:C228A:C275T:A336G:G551T	I13S:V14R:V16S:L17*:I18L:E19S:L20W:D21T:G22A:D23T:V24Y:H25T:G26A:H27T:K28S:F29S:S30A:V31C:R32A:G33A:E34R:G35A:E36R:G37A:D38M:A39P:D40T:Y41T:G42A:K43S:L44W:E45R:I46S:K47S:F48S:I49S:C50A:T51P:T52P:G53A:K54S:L55C:V57C:W59G:T61P:L62S:V63*:T64P:T65P:L66C:S67R:Y68T:G69A:I70F:L71C:C72A:F73S:A74R:R75A:Y76T:E78K:H79T:M80*:K81R:M82*:N83T:D84T:F85S:F86S:K87S:S88P:A89P:M90C:E93K:G94A:Y95I:I96S:Q97R:E98S:R99A…	amacGFP	34.86	6	326.653	633.463	168.443	I10S:V11R:V13S:L14*:I15L:E16S:L17W:D18T:G19A:D20T:V21Y:H22T:G23A:H24T:K25S:F26S:S27A:V28C:R29A:G30A:E31R:G32A:E33R:G34A:D35M:A36P:D37T:Y38T:G39A:K40S:L41W:E42R:I43S:K44S:F45S:I46S:C47A:T48P:T49P:G50A:K51S:L52C:V54C:W56G:T58P:L59S:V60*:T61P:T62P:L63C:S64R:Y65T:G66A:I67F:L68C:C69A:F70S:A71R:R72A:Y73T:E75K:H76T:M77*:K78R:M79*:N80T:D81T:F82S:F83S:K84S:S85P:A86P:M87C:E89K:G90A:Y91I:I92S:Q93R:E94S:R95A…
G33T:A231T:T492A	V14L:M80L:F168I	amacGFP	31.35	2	867.344	5610.67	134.081	V11L:M77L:F164I
A331T:G570T:A612T	E114V:G194C:T211S	amacGFP	41.43	2	101.491	14653.4	0.702934	E110V:G190C:T204S
T608C	wt	amacGFP	1215.73	105	1501.54	9244.49	243.888	wt
A115C:A132G:C414A:C656A	Y41S:K47E:H142N	amacGFP	29.53	2	635.851	6579.82	61.4464	Y38S:K44E:H138N
A508G:G682A	N173S:G235E	amacGFP	110.85	8	1270.65	6958.09	232.041	N169S:G227E
C389A:G413A	F133L	amacGFP	26.77	2	776.79	9470.66	63.7128	F129L
A394T:A700G	E135V:D241G	amacGFP	88.93	7	713.974	8888.41	57.351	E131V:D233G
G33T:A591T	V14L:N204Y	amacGFP	1238.79	77	1066	8743.67	129.962	V11L:N197Y
T294C:C323A:T450A:C469T:C476T:T686C	F102L:Y154N:A160V	amacGFP	43.26	5	765.708	9588.86	61.1448	F98L:Y150N:A156V
T294C:C347T	F102L	amacGFP	167.15	13	1590.76	9899.86	255.611	F98L
G33T:A73T:C536T	V14L:H27L	amacGFP	182.6	12	727.739	8315.37	63.6898	V11L:H24L
C341T	wt	amacGFP	406.54	34	1309.47	9557.89	179.401	wt
T295A	F102Y	amacGFP	665.27	53	1229.45	8952.59	168.839	F98Y
G694A	G239D	amacGFP	799.1	75	1534.68	9529.6	247.15	G231D
G707A	wt	amacGFP	569.7	35	1092.22	9800.94	121.718	wt
G33T:T532C:C574T	V14L:L181P:P195L	amacGFP	26.13	4	577.682	8105.28	41.1727	V11L:L177P:P191L
G162A	V57M	amacGFP	536.69	42	698.486	4916.64	99.2308	V54M
G33T:T589C	V14L:I203T	amacGFP	315.57	42	1444.11	8773.4	237.702	V11L:I196T
G33T:C260A:C317T:T434A:T647C	V14L:F148L	amacGFP	27.22	4	89.6853	470.659	17.0898	V11L:F144L
G33T:A240G:A269T:A381T	V14L:N83D:E93D:M131L	amacGFP	52.23	6	826.045	8364.11	81.5807	V11L:N80D:E89D:M127L
A30G:G302T:C521T:T543A	I13V:Q104H:Y185N	amacGFP	50.21	2	948.172	9265.41	97.0307	I10V:Q100H:Y181N
A463T:A696G	D158V:M240V	amacGFP	64.47	2	233.947	6421.06	8.52368	D154V:M232V
G15T:T141C:A252G:A304G:G309T:C528A:T562A:A618T	E8*:C50R:K87E:D105G:G107C:Q180K:L191*:I213F	amacGFP	104.48	4	0	449	0	E5*:C47R:K84E:D101G:G103C:Q176K:L187*:I206F
C32T:A592T	N204I	amacGFP	64.9	4	555.459	8936.93	34.5235	N197I
G33T:G329T:A538T	V14L:D183V	amacGFP	43.04	4	706.095	9995.91	49.8774	V11L:D179V
C464T	wt	amacGFP	351.48	39	1318.7	9622.35	180.721	wt
G33T:G53A:A427T:G522T	V14L:Y146F:G178W	amacGFP	114.49	7	443.145	8160.95	24.0631	V11L:Y142F:G174W
A67G:A495G	H25R:K169E	amacGFP	71.57	6	852.867	7696.21	94.5116	H22R:K165E
T589C:G654A	I203T:V226I	amacGFP	49.62	3	901.434	10226.8	79.4565	I196T:V218I
C161T:G215A:T532A	L181H	amacGFP	33.88	3	1144.27	9962.79	131.424	L177H
G33T:A76G:A319G:C677A:C684T	V14L:K28R:K110R:H236Y	amacGFP	120.02	14	772.918	7605.01	78.5538	V11L:K25R:K106R:H228Y
G33T:G86A:T139A:A353T	V14L:I49N	amacGFP	28.19	5	536.381	7223.99	39.8262	V11L:I46N
A30G:G33T:A490G:T493C:A610T	I13V:V14L:N167S:F168S:Q210L	amacGFP	56.12	4	0	449	0	I10V:V11L:N163S:F164S:Q203L
G33T:G125C	V14L	amacGFP	107.98	8	1006.12	9098.87	111.252	V11L
A7G:A274T:A496T	K2R:Y95F:K169M	amacGFP	53.35	2	775.235	4220.63	142.393	K2R:Y91F:K165M
G33T:A495G	V14L:K169E	amacGFP	1269.21	89	1002.84	8108.27	124.032	V11L:K165E
A349G:C459T:A471T:A490G	D120G:P157S:N161Y:N167S	amacGFP	80.89	5	416.6	5818.91	29.8262	D116G:P153S:N157Y:N163S
T181C:A186T	V63A:T65S	amacGFP	76.35	9	281.031	2119.56	37.2617	V60A:T62S
G27A:A453G:T493A:T667A:C690A	G12R:I155V:F168Y:F230Y:H238N	amacGFP	38.16	4	349.724	1774.74	68.9151	G9R:I151V:F164Y:F222Y:H230N
G33T:G392T	V14L:K134N	amacGFP	1062.5	63	1001.76	9184.49	109.264	V11L:K130N
A81G:T580A	S30G:L197Q	amacGFP	56.42	6	600.738	8326.18	43.3436	S27G:L193Q
T647C	wt	amacGFP	1562.66	145	1353.85	9610.88	190.711	wt
G33T:A229C:T670A:T706C	V14L:H79P:F231Y:L243P	amacGFP	32.16	2	197.585	823.346	47.4162	V11L:H76P:F223Y:L235P
G33T:C605A	V14L:S208R	amacGFP	434.51	22	1912.67	10352.3	353.378	V11L:S201R
G39A:A321G	V16I:T111A	amacGFP	38.78	9	1021.95	5418.34	192.748	V13I:T107A
G111T:C308T:T457A:C574A:C710T	D40Y:M156K:P195H	amacGFP	40.98	4	789.065	7247.81	85.9051	D37Y:M152K:P191H
G33T:G111A:A456T:T589A:C620T	V14L:D40N:M156L:I203N	amacGFP	30.03	4	1105.66	9192.44	132.988	V11L:D37N:M152L:I196N
T450A:C521T:T697A	Y154N:M240K	amacGFP	33.76	2	248.236	7855.15	7.8447	Y150N:M232K
G33T:T43A	V14L:L17Q	amacGFP	635.35	38	1015.27	8641.13	119.287	V11L:L14Q
C18A:G33T:A133G:A227T:C677A:A696G	L9M:V14L:K47R:E78D:M240V	amacGFP	62.72	6	797.037	7635.14	83.2033	L6M:V11L:K44R:E75D:M232V
G33T:C59A:A429G:A496G	V14L:N147D:K169R	amacGFP	35.72	6	1466.36	8589.67	250.325	V11L:N143D:K165R
G359A:A514G	E175G	amacGFP	84.86	9	1351.13	10248.2	178.134	E171G
G33T:A427T	V14L:Y146F	amacGFP	881.7	66	1085.61	9023.81	130.605	V11L:Y142F
G12A:C143T:G306C:C630T	E7K:D106H:R217C	amacGFP	27.14	3	498.947	873.11	285.128	E4K:D102H:R210C
A240C:C347G	N83H	amacGFP	32.8	6	946.33	7849.33	114.091	N80H
T670C	F231S	amacGFP	1163.49	129	424.335	1644.44	109.496	F223S
G413A:A483G:C506G	K165E:H172Q	amacGFP	34.19	2	1094.11	3386.04	353.533	K161E:H168Q
A3T:G33T:A490T:G537A:A696T	S1C:V14L:N167I:D183N:M240L	amacGFP	52.77	2	329.967	7434.46	14.6451	S1C:V11L:N163I:D179N:M232L
G33C:T511C:G611C:A696T	V14L:I174T:Q210H:M240L	amacGFP	36.94	5	648.279	5205.08	80.7415	V11L:I170T:Q203H:M232L
A336C:A438T	K116Q:S150C	amacGFP	50.94	4	433.405	8210.18	22.8789	K112Q:S146C
A463T:T499C:A505T:T671G	D158V:I170T:H172L:F231L	amacGFP	87.64	12	478.518	4502.45	50.8567	D154V:I166T:H168L:F223L
C25T:A112G	T11I:D40G	amacGFP	81.9	6	1191.28	8835.67	160.616	T8I:D37G
T432A	F148I	amacGFP	407.07	55	326.096	660.84	160.915	F144I
A391G	K134R	amacGFP	816.33	68	1292.52	9235.43	180.89	K130R
G399T:C642A	G137C:R222S	amacGFP	41.37	7	1226.45	7521.19	199.993	G133C:R214S
A144T:A549T	T51S:T187S	amacGFP	135.41	8	492.163	8620.65	28.0982	T48S:T183S
T135C:C690A	F48L:H238N	amacGFP	43.95	2	81.583	4446.95	1.49671	F45L:H230N
A316T:A337T:G395T:A475G:G563A:A591G	Y109F:K116M:E135D:N162S:N204D	amacGFP	33.55	3	1250.16	8930.61	175.004	Y105F:K112M:E131D:N158S:N197D
A461T:T714G	*246G	amacGFP	173.12	12	1128.99	9753.46	130.683	*238G
G33T:A106T:G631A	V14L:D38V:R217H	amacGFP	87.32	6	1010.38	7852.3	130.008	V11L:D35V:R210H
A3G:G63A:G258T:T277C:T432A:A621G	S1G:V24I:A89S:I96T:F148I:S214G	amacGFP	40.42	4	51.342	470.015	5.60834	S1G:V21I:A86S:I92T:F144I:S207G
G33T:C197T:A403T	V14L:N138I	amacGFP	82.07	4	927.516	8007.92	107.429	V11L:N134I
G33T:A471G:G662A	V14L:N161D	amacGFP	58.41	4	992.139	6528.06	150.786	V11L:N157D
G33T:G206T:A475T	V14L:L71F:N162I	amacGFP	42.17	7	1003.06	4673.64	215.277	V11L:L68F:N158I
G33T:C554T	V14L	amacGFP	319.98	25	1739.66	8799.63	343.926	V11L
T426C	Y146H	amacGFP	765.79	60	622.854	3865.37	100.365	Y142H
A415G	H142R	amacGFP	810.11	62	1376.69	9207.53	205.84	H138R
A703G	E242G	amacGFP	843.9	78	1605.11	9890.66	260.485	E234G
C25T:T526C	T11I:V179A	amacGFP	47.25	5	831.005	6165.16	112.012	T8I:V175A
G33T:C620T	V14L	amacGFP	39.05	4	559.859	9539.6	32.8569	V11L
G33T:A235T	V14L:K81M	amacGFP	793.56	48	1005.97	8297.8	121.958	V11L:K78M
G33.:.35C	V14S	amacGFP	1162.62	77	846.559	8483.16	84.4806	V11S
T580G:C590T:C690A	L197R:H238N	amacGFP	83.75	4	1176.69	10819.8	127.969	L193R:H230N
G9T:G33T:G525A:C676T:C690A	G6C:V14L:V179M:A233V:H238N	amacGFP	71.42	4	454.371	8082.77	25.5423	G3C:V11L:V175M:A225V:H230N
A7T:G33T	K2M:V14L	amacGFP	790.36	57	1062.69	8911.12	126.73	K2M:V11L
G15T:G33T:T454C	E8*:V14L:I155T	amacGFP	229.26	9	0	449	0	E5*:V11L:I151T
A453G	I155V	amacGFP	162.76	22	894.416	8597.61	93.0468	I151V
G33T:A466C:G502T	V14L:K159T:R171L	amacGFP	63.76	5	488.371	6800.13	35.0738	V11L:K155T:R167L
T326C:A403G:C464T:A483G:A634T	N138S:K165E:N218I	amacGFP	53.17	4	416.081	7787.21	22.2318	N134S:K161E:N211I
A3G:G33T:A288G:C635T	S1G:V14L:T100A	amacGFP	34.61	5	1734.93	9259.79	325.059	S1G:V11L:T96A
A13T:G33T:A81T	E7V:V14L:S30C	amacGFP	37.78	4	379.926	8083.28	17.857	E4V:V11L:S27C
G33T:A634G	V14L:N218S	amacGFP	1215.3	84	1208.37	8742.66	167.015	V11L:N211S
A360T:T426C:T434A:A489T:A592G	N124Y:Y146H:F148L:N167Y:N204S	amacGFP	33.04	6	32.3538	456.535	2.29286	N120Y:Y142H:F144L:N163Y:N197S
G419A:T454C:G486A	I155T:V166M	amacGFP	36.21	5	131.35	1958.48	8.80932	I151T:V162M
C5T:G33T:G194A	V14L	amacGFP	32.89	5	1460.39	8520.81	250.299	V11L
A235T	K81M	amacGFP	1109.47	82	1323.34	8756.36	199.996	K78M
T388A	F133Y	amacGFP	322.55	54	1596.06	6847.84	372.001	F129Y
G33T:C62A:A381G:A456C:T697C	V14L:D23E:M131V:M156L:M240T	amacGFP	123.1	5	1408.04	9190.54	215.72	V11L:D20E:M127V:M152L:M232T
G33T:T689A	V14L	amacGFP	948.37	73	1278.94	9076.74	180.207	V11L
A16G:A490G:G523T	E8G:N167S:G178V	amacGFP	47.51	2	586.03	11324.2	30.3273	E5G:N163S:G174V
G477T:T511C	G163C:I174T	amacGFP	140.44	12	779.741	7097.24	85.6667	G159C:I170T
G33T:T526G	V14L:V179G	amacGFP	166.82	15	522.819	4635.7	58.964	V11L:V175G
G33T:C500T:G662A	V14L	amacGFP	59.07	4	280.49	8418.73	9.34519	V11L
T454C	I155T	amacGFP	444.46	72	714.712	1984.45	257.408	I151T
A418T:G567T:T580A	K143M:D193Y:L197Q	amacGFP	68.45	8	1735.38	9359.32	321.769	K139M:D189Y:L193Q
G33T:G357A:C464T:C566T	V14L:V123M	amacGFP	58.14	7	1184.94	7672.91	182.994	V11L:V119M
G33T:G563A	V14L	amacGFP	437.45	40	1202.99	8957.72	161.558	V11L
C26A:G33T:C365T:G523C	V14L:G178A	amacGFP	95.76	6	1622.98	9547.2	275.9	V11L:G174A
G8A:A552T:A649G	N188Y:H224R	amacGFP	30.2	5	57.7648	477.223	6.99205	N184Y:H216R
A6T:G33T:A144G:A235T:C362T:A381G:T382C:G636A:T652C	K2*:V14L:T51A:K81M:M131A:E219K:M225T	amacGFP	111.43	6	21.3898	452.194	1.01178	K2*:V11L:T48A:K78M:M127A:E212K:M217T
G4A:C59T:A402G:G522T	S1N:N138D:G178W	amacGFP	34.05	2	588.596	6811.91	50.8588	S1N:N134D:G174W
G215A:A229T	H79L	amacGFP	125.88	7	1323.51	8366.29	209.374	H76L
C437T	wt	amacGFP	273.02	25	1107.01	8633.72	141.939	wt
T294C:G423A	F102L:E145K	amacGFP	45.85	6	1413.42	8207.6	243.402	F98L:E141K
A549G	T187A	amacGFP	556.51	53	1603.03	9670.36	265.73	T183A
G704A	wt	amacGFP	586.72	46	1956.18	9506.9	402.513	wt
G33T:A610G:T669C	V14L:Q210R:F231L	amacGFP	34.37	4	582.924	7385.91	46.0066	V11L:Q203R:F223L
A349T:A451T:G564T:C569T	D120V:Y154F:G192C	amacGFP	82.75	6	998.512	9444.07	105.572	D116V:Y150F:G188C
A133G:G423A	K47R:E145K	amacGFP	60.28	6	1243.82	7181.28	215.435	K44R:E141K
A514G	E175G	amacGFP	1222.26	91	1230.04	9752.32	155.142	E171G
G33T:C185T:A201G:A483G:A603G:C609A:C644T	V14L:I70V:K165E:S208G:Q210K	amacGFP	37.16	4	364.596	5342.32	24.8824	V11L:I67V:K161E:S201G:Q203K
C259A:C460A	A89D:P157Q	amacGFP	27.73	5	265.675	559.655	126.119	A86D:P153Q
T205C:T556C	L71S:V189A	amacGFP	114.78	9	286.587	1735.01	47.3381	L68S:V185A
G33T:C62T:C362T:A445G:T457G	V14L:N152S:M156R	amacGFP	94.65	7	631.675	8928.01	44.6923	V11L:N148S:M152R
T326C:T556A:G567T:A672T	V189D:D193Y:S232C	amacGFP	112.33	5	826.241	5593.48	122.048	V185D:D189Y:S224C
G33T:T43A:A81C:C260A:G425A	V14L:L17Q:S30R	amacGFP	28.72	3	152.448	8740.18	2.65904	V11L:L14Q:S27R
G101T:T250A:T597C	E36D:F86Y:Y206H	amacGFP	36.16	6	894.135	7886.81	101.369	E33D:F83Y:Y199H
C285T:C372T:C620A:T670C:C690A	R99C:F231S:H238N	amacGFP	64.11	5	43.6519	576.009	3.30808	R95C:F223S:H230N
G33T:T107A:G125T:A154G	V14L:D38E:K54R	amacGFP	66.95	6	613.119	8474.13	44.3603	V11L:D35E:K51R
G33T:G125T:G392T:A672T	V14L:K134N:S232C	amacGFP	31.13	7	663.14	8446.13	52.0658	V11L:K130N:S224C
A336G	K116E	amacGFP	2279.2	156	1091.23	8058.92	147.759	K112E
G33C	V14L	amacGFP	1839.5	130	1523.61	8741.46	265.561	V11L
A353G:G555A:C617A	V189I	amacGFP	84.46	4	956.274	8433.69	108.429	V185I
T255A:C256G:G395T:C512G	E135D:I174M	amacGFP	45.11	4	1110.59	10500.8	117.458	E131D:I170M
G33T:A461C	V14L	amacGFP	167.41	13	1655.26	9736.72	281.398	V11L
G33T:C212A	V14L:F73L	amacGFP	436.53	29	743.749	7449.58	74.2542	V11L:F70L
G70A:G206A:A226T	G26D:E78V	amacGFP	48.05	6	982.114	8067.36	119.562	G23D:E75V
C362T:A415T	H142L	amacGFP	92.45	4	675.705	7871.28	58.0054	H138L
G33T:A626G	V14L	amacGFP	184.91	15	1046.69	9138.28	119.887	V11L
G525A:C574T:A591T:C690A	V179M:P195L:N204Y:H238N	amacGFP	32.34	2	178.96	7621.97	4.20189	V175M:P191L:N197Y:H230N
G33T:A397T	V14L:D136V	amacGFP	1292.86	107	1272.81	8245.42	196.477	V11L:D132V
T589G	I203S	amacGFP	86.93	11	2085.76	10263.8	423.861	I196S
G33T:T382A	V14L:M131K	amacGFP	348.34	22	959.476	8578.53	107.314	V11L:M127K
C18T:G33T:A598G	V14L:Y206C	amacGFP	76.52	4	656.316	9097.77	47.3469	V11L:Y199C
A709G	Y244C	amacGFP	605.38	58	1241.71	9005.08	171.22	Y236C
A55T:A67G:A153G:C179T:A268C	D21V:H25R:K54E:E93A	amacGFP	40.87	4	581.736	8205.86	41.2408	D18V:H22R:K51E:E89A
A49T:A129T:A337G:G524T	E19V:I46F:K116R	amacGFP	74.46	5	926.881	6150.11	139.69	E16V:I43F:K112R
G33T:A144G:T492C:C635T	V14L:T51A:F168L	amacGFP	29.37	2	1166.92	4127.89	329.881	V11L:T48A:F164L
T19A:A490G:T689A	L9Q:N167S	amacGFP	61.13	7	1394.26	9175.05	211.875	L6Q:N163S
T204C:A301T:G513A:T657C:T671C	Q104L:E175K:F227L	amacGFP	177.68	8	591.37	9765.5	35.8117	Q100L:E171K:F219L
A154T:C479T	K54M	amacGFP	44.92	4	717.657	9172.13	56.1518	K51M
G33T:T107A:A313T:A381C:A418T	V14L:D38E:K108M:M131L:K143M	amacGFP	60.26	4	1148.12	9371.72	140.655	V11L:D35E:K104M:M127L:K139M
G20A:C89T:A465G:C690A	K159E:H238N	amacGFP	145.85	13	990.589	8781.96	111.737	K155E:H230N
A226G:A312C:G519A	E78G:K108Q:G177S	amacGFP	102.91	4	578.483	8784.35	38.0953	E75G:K104Q:G173S
A319T:A709T	K110M:Y244F	amacGFP	52.47	7	1575.73	9454.13	262.63	K106M:Y236F
G33T:A186T:C257T:A370C:T487C:A582T	V14L:T65S:E127A:V166A:I198F	amacGFP	39.14	7	1203.61	10962.8	132.145	V11L:T62S:E123A:V162A:I194F
T47C:A81T:G332A:A391G:A438C:C533T:G654A	S30C:K134R:S150R:V226I	amacGFP	83.61	5	1215.68	7392.8	199.909	S27C:K130R:S146R:V218I
A75G:A154G	K28E:K54R	amacGFP	37.09	3	1183.2	8175.87	171.23	K25E:K51R
G82T:A381T	S30I:M131L	amacGFP	125.65	13	612.098	7715.75	48.5583	S27I:M127L
C644T:C695T	wt	amacGFP	49.66	6	820.248	8370.93	80.3741	wt
C677T	wt	amacGFP	175.05	21	1996.14	9148.63	435.537	wt
T277A:C640T:A711G	I96N:T221I:K245E	amacGFP	42.35	8	1082.8	6875.81	170.518	I92N:T213I:K237E
A274T:A343T:G681T:T708A	Y95F:E118V:G235W:Y244N	amacGFP	128.34	6	255.273	4044.74	16.1109	Y91F:E114V:G227W:Y236N
G27C:G33T	G12R:V14L	amacGFP	335.22	23	774.961	8526.13	70.4381	G9R:V11L
G338A:T561C:C676T:C690A	A233V:H238N	amacGFP	41.21	8	1233.93	7144.89	213.1	A225V:H230N
G86A:C251T:C572T	wt	amacGFP	34.97	2	210.714	7607.58	5.83632	wt
C38A:T326A	wt	amacGFP	39.25	7	1111.79	8647.08	142.948	wt
C260T	wt	amacGFP	214.25	22	1530.83	9432.97	248.43	wt
G53T:C68G:C71T:T139A	H25Q:I49N	amacGFP	79.82	11	1612.94	8441.74	308.182	H22Q:I46N
G33T:T107C	V14L	amacGFP	1137.82	98	1280.19	9261.26	176.962	V11L
G33T:A127G:A269G:C540A	V14L:E45G:H184N	amacGFP	69.96	7	874.051	4143.44	184.38	V11L:E42G:H180N
C197T	wt	amacGFP	557.17	43	1311.24	9121.65	188.49	wt
A3C:G576T	S1R:V196L	amacGFP	39.32	2	823.769	9148.37	74.1766	S1R:V192L
A153G:C449A:C690A	K54E:H238N	amacGFP	41.33	2	602.739	9641.87	37.6788	K51E:H230N
C161T:G194A:A394T	E135V	amacGFP	137.81	13	1326.23	9107.79	193.119	E131V
G14T:T211A:C386A:A451T:T457C:A610G	E7D:F73Y:D132E:Y154F:M156T:Q210R	amacGFP	27.86	5	106.431	2001.48	5.65956	E4D:F70Y:D128E:Y150F:M152T:Q203R
G422A:G486T:A712G	V166L:K245R	amacGFP	31.17	3	1116.55	6750.8	184.671	V162L:K237R
A498G	I170V	amacGFP	357.18	18	1620.97	15855.6	165.717	I166V
G303A	D105N	amacGFP	639.74	41	1251.5	9167.24	170.853	D101N
G33T:A201T:A646T	V14L:I70F:D223V	amacGFP	36.31	5	311.702	644.085	150.846	V11L:I67F:D215V
C290T:A331T:T409.:.414A:C575A	E114V:L140R	amacGFP	60.68	7	406.439	8007.38	20.63	E110V:L136R
G33T:A592C:T678C	V14L:N204T:C234R	amacGFP	61.3	4	956.071	7512.95	121.666	V11L:N197T:C226R
C116A:A154T:T181C:A436G	Y41*:K54M:V63A:N149S	amacGFP	29.21	4	52.6278	471.311	5.87656	Y38*:K51M:V60A:N145S
A144T	T51S	amacGFP	507.73	51	1509.19	8947.07	254.568	T48S
G44T	wt	amacGFP	345.71	33	1545.95	9414.45	253.862	wt
G33T:C41T:C218A:C260T:T557C	V14L	amacGFP	99.91	6	309.063	9806.43	9.74057	V11L
C650T	wt	amacGFP	556.85	46	1408.16	9782.47	202.7	wt
T34C:T47C:T667C	V14A:F230S	amacGFP	39.82	7	890.84	7608.34	104.306	V11A:F222S
G643T	R222L	amacGFP	370.1	20	1148.18	9543.5	138.137	R214L
T247C:A375G:C460A:G683A	F85S:K129E:P157Q	amacGFP	30.17	6	187.064	537.022	65.1613	F82S:K125E:P153Q
T619C	I213T	amacGFP	985.71	89	1459.1	10618.7	200.492	I206T
C23T:T195C:G332T	Y68H:E114D	amacGFP	77.42	4	60.25	480.609	7.55304	Y65H:E110D
G33T:A312G	V14L:K108E	amacGFP	900.46	66	1022.11	8283.59	126.117	V11L:K104E
C372T:C416T:A612G:C690A	T211A:H238N	amacGFP	36.13	5	259.863	1618.43	41.7248	T204A:H230N
G57T:A444G:T557A:C690G	G22C:N152D:H238D	amacGFP	27.09	4	397.503	7639.56	20.6829	G19C:N148D:H230D
G488A	wt	amacGFP	483.82	39	1424.78	9357.16	216.945	wt
A55T:T181C:A505T:G699T	D21V:V63A:H172L:D241Y	amacGFP	32.89	5	383.425	1212.4	121.26	D18V:V60A:H168L:D233Y
T19C:A544C	L9P:Y185S	amacGFP	34.26	5	1021.77	8947.6	116.681	L6P:Y181S
T232C:A552G	M80T:N188D	amacGFP	47.11	4	194.217	640.218	58.9177	M77T:N184D
G33T:G284A:A466G:C521T	V14L:K159R	amacGFP	61.26	6	637.956	8203.44	49.6118	V11L:K155R
C68T:C71A:A115G:C401T:C431T:G517A:C684T	Y41C:G176D:H236Y	amacGFP	38.98	4	600.578	8536.81	42.2515	Y38C:G172D:H228Y
G33T:C98G:A445T:T671C:T708A	V14L:N152I:Y244N	amacGFP	51.41	2	1645.91	14168.4	191.202	V11L:N148I:Y236N
G519T	G177C	amacGFP	845.72	77	1312.86	9211.64	187.111	G173C
C113G:C308T:A418C	D40E:K143T	amacGFP	186.26	12	1220.25	8406.12	177.135	D37E:K139T
G53A:A94T	E34V	amacGFP	60.23	2	267.641	7790.57	9.19467	E31V
G33T:G384A	V14L:D132N	amacGFP	131.16	7	1531.32	8541.85	274.523	V11L:D128N
G33T:T669A	V14L:F231I	amacGFP	533.03	36	882.832	6679.51	116.684	V11L:F223I
T107A	D38E	amacGFP	901.62	61	1295.75	9625.18	174.434	D35E
G86T:G645C	D223H	amacGFP	127.7	12	1621.39	8465.98	310.526	D215H
G33T:A268C	V14L:E93A	amacGFP	302.37	25	1189.01	8949.41	157.971	V11L:E89A
G335T:A618G:T667C:C677T	I213V:F230S	amacGFP	56.93	8	1170.61	12448.4	110.081	I206V:F222S
A6T:G33T:A49G:A186T:T511C:T670C	K2*:V14L:E19G:T65S:I174T:F231S	amacGFP	51.58	4	25.5434	453.6	1.43842	K2*:V11L:E16G:T62S:I170T:F223S
A700T	D241V	amacGFP	342.53	37	1523.08	8879.32	261.256	D233V
G33T:T526G:A614T	V14L:V179G	amacGFP	54.61	6	731.566	4611.95	116.044	V11L:V175G
A174T:A235T:G682A	T61S:K81M:G235E	amacGFP	52.42	2	563.579	7322.19	43.3779	T58S:K78M:G227E
C559T	P190L	amacGFP	182.37	11	747.066	7933.53	70.3479	P186L
T294A:C518T	F102I	amacGFP	69.95	4	359.803	9675.63	13.3798	F98I
G33T:G239T:C365A:C380T	V14L:M82I	amacGFP	62.21	5	1041.83	8725.67	124.393	V11L:M79I
C26A	wt	amacGFP	516.17	48	1385.06	9284.75	206.619	wt
A129G:T697A	I46V:M240K	amacGFP	76.95	2	320.172	9289.71	11.0348	I43V:M232K
A7G:A16T:G33T:A115G:A397G:T492A	K2R:E8V:V14L:Y41C:D136G:F168I	amacGFP	146.23	12	1228.05	3373.18	447.087	K2R:E5V:V11L:Y38C:D132G:F164I
T294C	F102L	amacGFP	1462.83	130	1460.28	9426.61	226.213	F98L
C176T	wt	amacGFP	200.84	10	908.723	9080.21	90.9425	wt
C5T:G86A:C212T:A381G:A430G:G524T:G683A	M131V:N147S	amacGFP	77.66	7	1451.08	9034.9	233.057	M127V:N143S
A637G	E219G	amacGFP	302.18	37	970.636	4163	226.311	E212G
G33T:C218A:G263T	V14L:M90I	amacGFP	100.58	6	559.957	2988.74	104.911	V11L:M87I
G111A:G206A:A508T:G654C	D40N:N173I:V226L	amacGFP	34.83	2	720.119	4764.29	108.845	D37N:N169I:V218L
G44T:A366G:A612T	I126V:T211S	amacGFP	128.74	6	766.392	14147.6	41.5163	I122V:T204S
G302C:G344A:A498G:C630A:A687T	Q104H:I170V:R217S:T237S	amacGFP	35.84	3	718.984	14658.2	35.2661	Q100H:I166V:R210S:T229S
A552T	N188Y	amacGFP	1132.32	78	328.377	518.326	208.038	N184Y
G33T:A634T	V14L:N218I	amacGFP	335.16	28	1251.45	8452.85	185.277	V11L:N211I
G33T:A55C:A229G:A456T:A610G:C690T:A691C	V14L:D21A:H79R:M156L:Q210R:H238S	amacGFP	104.19	4	1503.54	8499.74	265.963	V11L:D18A:H76R:M152L:Q203R:H230S
G33T:C92T:C536G	V14L	amacGFP	78.32	2	93.3286	9198.44	0.946925	V11L
C265A:C285A:C573T:G578A	P92H:R99S:P195S	amacGFP	71.35	7	138.758	490.584	39.2464	P88H:R95S:P191S
G10A:G33T:A283T:G303T:A496T:G513A:C617T:A664T	G6D:V14L:E98V:D105Y:K169M:E175K:E229V	amacGFP	33.14	5	59.4946	479.536	7.38131	G3D:V11L:E94V:D101Y:K165M:E171K:E221V
A201G:C287T:C476T:A591G:T674C	I70V:N204D	amacGFP	40.23	5	1686.49	8360.85	340.187	I67V:N197D
T658A	F227Y	amacGFP	135.12	24	89.1453	495.104	16.0509	F219Y
G88T	R32L	amacGFP	500.64	42	1280.4	8893.06	184.348	R29L
A67T:G576A	H25L:V196M	amacGFP	119.71	7	659.527	8553.16	50.8555	H22L:V192M
G33T:T448C:T511C:C650T	V14L:V153A:I174T	amacGFP	40.19	6	540.519	5790.91	50.4517	V11L:V149A:I170T
G33T:C705T	V14L	amacGFP	385.18	30	1021.39	8990.74	116.034	V11L
A240C:A568T:A628G	N83H:D193V:D216G	amacGFP	46.44	7	1119.19	7792.07	160.75	N80H:D189V:D209G
C149T:T211A:C586A	F73Y:P199H	amacGFP	31.73	4	0	449	0	F70Y:P195H
G33T:G567T	V14L:D193Y	amacGFP	537.34	35	1420.56	9196.34	219.435	V11L:D189Y
G33T:T47A	V14L	amacGFP	678.44	57	1163.21	8674.22	155.986	V11L
G33T:T473C:C596T:T641G:A672G:A703T:T714G	V14L:S232G:E242V:*246G	amacGFP	33.85	4	595.378	7935.46	44.6698	V11L:S224G:E234V:*238G
A288T:A610G	T100S:Q210R	amacGFP	63.38	8	1250.17	10292.6	151.85	T96S:Q203R
G27C:G33T:A261T	G12R:V14L:M90L	amacGFP	127.42	6	391.733	8256.69	18.5855	G9R:V11L:M87L
G33T:A361G	V14L:N124S	amacGFP	1066.48	81	658.541	5134.92	84.4564	V11L:N120S
G15A:G342A	E8K:E118K	amacGFP	49.56	7	771.52	7438.23	80.025	E5K:E114K
G33T:C36G	V14L:P15A	amacGFP	54.89	6	361.856	7039.45	18.6009	V11L:P12A
G33T:C131T	V14L	amacGFP	164.92	15	1295.89	9312.42	180.333	V11L
C257A:T277A:C372T:C690A	I96N:H238N	amacGFP	75.73	4	265.911	7319.92	9.65973	I92N:H230N
G33T:T107A:C209T:G284T:A451G:T697C	V14L:D38E:E98D:Y154C:M240T	amacGFP	37.42	3	302.476	5541.7	16.5097	V11L:D35E:E94D:Y150C:M232T
G33T:C56T:T647A	V14L:D223E	amacGFP	30.99	5	1238.08	7694.51	199.213	V11L:D215E
T181C	V63A	amacGFP	1340.68	119	677.708	2579.65	178.043	V60A
G164A:G348T	D120Y	amacGFP	36.4	5	775.869	8432.72	71.3854	D116Y
G33T:A691G	V14L:H238R	amacGFP	383.07	33	1234.2	10042.1	151.686	V11L:H230R
G383A:T434C:G567T:G694T	M131I:D193Y:G239V	amacGFP	102.22	8	975.872	8975.27	106.106	M127I:D189Y:G231V
A13G:G33T:T238A:G383T:T708C	E7G:V14L:M82K:M131I:Y244H	amacGFP	55.57	6	1188.38	8506.98	166.009	E4G:V11L:M79K:M127I:Y236H
G33T:G467C:C642A:G694T:C710G	V14L:K159N:R222S:G239V:Y244*	amacGFP	36.74	2	1079.27	8685.08	134.118	V11L:K155N:R214S:G231V:Y236*
A73G:C172T:G182C	H27R:P60L	amacGFP	41.05	6	526.972	3623.89	76.6304	H24R:P57L
A696T	M240L	amacGFP	739.71	55	1393.5	9580.42	202.69	M232L
G96A:G243A:A612G:A664G:A672T	G35S:D84N:T211A:E229G:S232C	amacGFP	65.2	6	89.3658	501.903	15.9119	G32S:D81N:T204A:E221G:S224C
G12A:A133G:C140T:C177A:A427T:C536T:G576T	E7K:K47R:L62I:Y146F:V196L	amacGFP	91.18	5	232.773	9184.49	5.89942	E4K:K44R:L59I:Y142F:V192L
G101T	E36D	amacGFP	923.69	46	1028.43	8882.82	119.069	E33D
A6T:A13G:G33T:G128C:G155T:T298C:T493C	K2*:E7G:V14L:E45D:K54N:F103S:F168S	amacGFP	88.25	4	63.5937	485.924	8.32262	K2*:E4G:V11L:E42D:K51N:F99S:F164S
T210A:A376G:A424G:C593A:A672T:G681A	F73I:K129R:E145G:N204K:S232C:G235R	amacGFP	67.1	9	1553.45	9443.53	255.541	F70I:K125R:E141G:N197K:S224C:G227R
G258T:T562C:G567T	A89S:L191S:D193Y	amacGFP	77.77	2	304.188	7943.75	11.6482	A86S:L187S:D189Y
A24G:G33T:G93A:C104T:C573A	T11A:V14L:E34K:P195T	amacGFP	84.58	7	572.276	7771.74	42.1398	T8A:V11L:E31K:P191T
A133G:A183T:C459T	K47R:T64S:P157S	amacGFP	64.77	12	1076.79	7729.37	150.009	K44R:T61S:P153S
T387C:T532C	F133L:L181P	amacGFP	69.9	4	411.351	8027.83	21.0778	F129L:L177P
C260G:C546G:A612T:A621T:A626G	Q186E:T211S:S214C	amacGFP	37.81	4	147.544	563.36	38.642	Q182E:T204S:S207C
G33T:C616T	V14L:A212V	amacGFP	866.02	57	1280.3	9270.24	176.819	V11L:A205V
G33T:G122T	V14L:K43N	amacGFP	91.82	18	1100.8	6670.98	181.646	V11L:K40N
C455T	wt	amacGFP	231.17	23	1256.8	9334.89	169.208	wt
G33T:A55T	V14L:D21V	amacGFP	1266.55	82	1206.55	8858.36	164.337	V11L:D18V
C109T:C222T	A39V:P77S	amacGFP	39.13	4	281.573	831.95	95.2979	A36V:P74S
G4T:G33T:T432C:G530A:G698T	S1I:V14L:F148L:M240I	amacGFP	105.85	8	300.32	594.164	151.797	S1I:V11L:F144L:M232I
G164T:G194A:C300A:T382C:C386T:A621T:C690A:A709G	Q104K:M131T:S214C:H238N:Y244C	amacGFP	125.16	6	427.939	8779.89	20.8581	Q100K:M127T:S207C:H230N:Y236C
G150A	G53S	amacGFP	595.02	58	1012.38	7954.29	128.849	G50S
C347T	wt	amacGFP	483.04	47	1489.63	9143.27	242.693	wt
A127T:A621T	E45V:S214C	amacGFP	37.09	4	722.477	8436.49	61.8708	E42V:S207C
G33T:G348T	V14L:D120Y	amacGFP	194.29	20	779.282	8213.03	73.9411	V11L:D116Y
C171A:A269T	P60T:E93D	amacGFP	212.39	12	876.724	8424.09	91.2437	P57T:E89D
G33T:T697C	V14L:M240T	amacGFP	1039.11	87	1289.22	9491.82	175.107	V11L:M232T
G303A:A582T:T670C	D105N:I198F:F231S	amacGFP	30.92	2	400.199	951.588	168.307	D101N:I194F:F223S
G28A:G33T:C71T:C149A:A154G:A183T:G348A:A691T	G12E:V14L:K54R:T64S:D120N:H238L	amacGFP	90.7	8	1150.59	8055.28	164.348	G9E:V11L:K51R:T61S:D116N:H230L
C80T:G101A:A301T:G344C:C414A:G662T	Q104L:E118D:H142N	amacGFP	56.8	7	394.259	7878.85	19.7288	Q100L:E114D:H138N
A67G:A507T:T580A:T708G	H25R:N173Y:L197Q:Y244D	amacGFP	108.84	7	786.664	6307.8	98.1071	H22R:N169Y:L193Q:Y236D
G10T	G6V	amacGFP	207.57	24	1273.96	8704.85	186.445	G3V
G53T:A313T:C579T	K108M	amacGFP	139.44	11	589.868	9365.98	37.1499	K104M
C26A:A549G:C575T:T657A	T187A:F227I	amacGFP	46.29	6	987.39	13153.6	74.1198	T183A:F219I
G33T:A226G:G693T	V14L:E78G:G239C	amacGFP	53.83	2	388.281	7932.35	19.006	V11L:E75G:G231C
C119T	wt	amacGFP	557.45	40	1510.54	9772.38	233.486	wt
G33T:G60A:A312G:C575A	V14L:D23N:K108E	amacGFP	57.24	7	1304.64	8236.85	206.644	V11L:D20N:K104E
C259T	A89V	amacGFP	414.66	32	1234.66	8649.92	176.232	A86V
G33T:T667C	V14L:F230S	amacGFP	470.85	60	1294.55	8182.05	204.822	V11L:F222S
A349T:T606A	D120V:C209S	amacGFP	36.61	2	796.517	13115.3	48.3739	D116V:C202S
G33T:G57T	V14L:G22C	amacGFP	570.92	77	1171.45	7660.64	179.134	V11L:G19C
T21C:C566T:A626G:C677A	F10L	amacGFP	97.2	6	1173.99	7965.31	173.031	F7L
A240T:C278T:A461G:C575A	N83Y	amacGFP	31.98	3	1307.16	9045.66	188.892	N80Y
C23T:T255A:C579A	S88T:L197M	amacGFP	33.6	6	413.366	6050.15	28.2425	S85T:L193M
T298A:A582T:C584A:C617A:A634G	F103Y:I198L:N218S	amacGFP	76.38	9	1137.3	7907.62	163.569	F99Y:I194L:N211S
G33T:C98T:A313T	V14L:K108M	amacGFP	32.58	9	1377.87	7855.28	241.689	V11L:K104M
C38T:C701A	D241E	amacGFP	55.54	2	96.729	9638.1	0.970782	D233E
A121G:C149A:T557C	K43R	amacGFP	39.53	6	1419.08	8323.72	241.933	K40R
G33T:C531A	V14L:L181I	amacGFP	261.16	21	1231.04	8834.35	171.542	V11L:L177I
A227G:A375G:T562C	K129E:L191S	amacGFP	58.28	5	756.558	7965.94	71.8535	K125E:L187S
T40C:G54T:A138G:C221T:C690A	V16A:D21Y:I49V:H238N	amacGFP	58.64	4	341.135	8496.57	13.6965	V13A:D18Y:I46V:H230N
A268T:C401T:A603T	E93V:S208C	amacGFP	119.5	6	1072.61	9118.58	126.171	E89V:S201C
A75G:C110A:C350T:A591G:T706C	K28E:N204D:L243P	amacGFP	70.21	2	564.394	8773	36.3092	K25E:N197D:L235P
C59T:G69A:A226G:G515A:A568G:C690A	G26S:E78G:D193G:H238N	amacGFP	46.57	4	502.231	8034.49	31.3942	G23S:E75G:D189G:H230N
G33T:G482T	V14L	amacGFP	741.21	47	1115.32	9088.96	136.863	V11L
G44T:A121T:C152T:A436G	K43M:N149S	amacGFP	221.26	16	745.798	3911.88	142.186	K40M:N145S
C690T	H238Y	amacGFP	447.55	39	1260.63	9364.91	169.695	H230Y
T211C	F73S	amacGFP	683	69	1375.84	8057.08	234.941	F70S
G33T:G88A:T195C:A237T:A391G:C536A:A568T	V14L:R32H:Y68H:M82L:K134R:D193V	amacGFP	62.35	9	211.797	531.106	84.4612	V11L:R29H:Y65H:M79L:K130R:D189V
G33T:A67G:C536A:T671A	V14L:H25R:F231L	amacGFP	26.32	2	227.025	5872.96	8.77588	V11L:H22R:F223L
T294A	F102I	amacGFP	773.3	67	1355.97	9880.97	186.081	F98I
A154G:A696G	K54R:M240V	amacGFP	69.46	4	837.501	10028.6	69.9406	K51R:M232V
T557A	wt	amacGFP	1144.66	83	1427.77	9418.95	216.43	wt
A483G	K165E	amacGFP	969.25	98	1566.69	9285.1	264.35	K161E
G33T:A381G	V14L:M131V	amacGFP	1676.3	116	1066.71	8765.43	129.814	V11L:M127V
G33T:A81G:T493C	V14L:S30G:F168S	amacGFP	63.64	6	17.3868	451.094	0.670151	V11L:S27G:F164S
C605A:A625T	S208R:K215I	amacGFP	33.21	5	412.849	9478.64	17.9819	S201R:K208I
G33T:A133T:T470C:G497A	V14L:K47M	amacGFP	32	2	360.623	7915.09	16.4305	V11L:K44M
G33T:C173T	V14L	amacGFP	295.92	33	1981.38	9068.83	432.895	V11L
G33T:A390G	V14L:K134E	amacGFP	720.07	64	1099.9	8967.97	134.899	V11L:K130E
G410A:A505T:T556C:T632A:T689C	H172L:V189A	amacGFP	68.4	5	1556.52	13407.6	180.702	H168L:V185A
T141A	C50S	amacGFP	1542.64	124	1203.98	8627.04	168.025	C47S
G33T:A183G	V14L:T64A	amacGFP	350.62	44	515.333	2077.6	127.824	V11L:T61A
A321G	T111A	amacGFP	858.12	64	354.289	2079.18	60.3703	T107A
A276T:C401T	I96F	amacGFP	26.77	4	527.146	3265.04	85.1084	I92F
G33T:G215T	V14L	amacGFP	445.79	29	907.236	8572.28	96.0162	V11L
T250A:G604T	F86Y:S208I	amacGFP	34.4	4	513.331	7767.46	33.9247	F83Y:S201I
G33T:C323A	V14L	amacGFP	206.46	20	899.152	8668.37	93.2672	V11L
C159G	P56A	amacGFP	339.14	29	1566.42	9180.24	267.277	P53A
G332A:G344T:A700T	E118D:D241V	amacGFP	31.69	7	1587.51	8658.08	291.078	E114D:D233V
A288G:G570T	T100A:G194C	amacGFP	55.71	5	1266.66	8497.37	188.813	T96A:G190C
C83A:A445G:A471G	S30R:N152S:N161D	amacGFP	76.65	7	1488.71	7099.22	312.182	S27R:N148S:N157D
G33T:C501T	V14L:R171C	amacGFP	664.87	48	797.247	6962.63	91.2876	V11L:R167C
A121G:C161G:C290A:C389T:A415T:C441T:T657C	K43R:H142L:H151Y:F227L	amacGFP	68.46	4	290.423	1333.83	63.2357	K40R:H138L:H147Y:F219L
G33T:C66T	V14L:H25Y	amacGFP	153.84	13	882.394	7395.22	105.287	V11L:H22Y
C59T:A375G:T526C:C579T	K129E:V179A	amacGFP	82.81	7	981.781	6323.11	152.44	K125E:V175A
G344T:A592G	E118D:N204S	amacGFP	61.69	5	301.157	8252.72	10.9898	E114D:N197S
G33T:A174T:A312G:C690A	V14L:T61S:K108E:H238N	amacGFP	31.45	2	363.132	6794.12	19.4087	V11L:T58S:K104E:H230N
G33T:C459T	V14L:P157S	amacGFP	308.89	30	1194.42	7347.51	194.167	V11L:P153S
G485A	wt	amacGFP	807.08	74	1543.33	9126.31	260.988	wt
G33T:C224A	V14L	amacGFP	465.02	34	1187.35	8826.51	159.724	V11L
A436T:G581T	N149I	amacGFP	84.51	11	321.625	2540.94	40.7105	N145I
C32T:G33T	V14L	amacGFP	352.52	22	1251.85	8805.34	177.974	V11L
G33T:A269G:T689A	V14L	amacGFP	50.32	7	2132.24	9469.94	480.091	V11L
A415G:A418G	H142R:K143R	amacGFP	67.62	5	1866.93	9670.42	360.421	H138R:K139R
G33T:T114A:A397C:C437T:A472G:A507G:A610G	V14L:Y41N:D136A:N161S:N173D:Q210R	amacGFP	85.48	8	855.475	7585.47	96.4787	V11L:Y38N:D132A:N157S:N169D:Q203R
C266T:T358C:C575T	V123A	amacGFP	37.35	2	151.028	7236.38	3.15206	V119A
G33T:C104T	V14L	amacGFP	400.15	36	1304.76	9115.35	186.763	V11L
C92T:T452C:T511C	I174T	amacGFP	46.97	3	1475.12	9356.93	232.551	I170T
C26A:G33T:T432A	V14L:F148I	amacGFP	31.09	4	551.985	992.769	306.907	V11L:F144I
A67G:C479T:C480A	H25R:L164M	amacGFP	36.17	4	103.669	1621.11	6.62954	H22R:L160M
A444G:G458A:A484G:C630A	N152D:M156I:K165R:R217S	amacGFP	140.29	11	1385.84	6456.46	297.46	N148D:M152I:K161R:R210S
C116T	wt	amacGFP	589.07	50	1394.83	9819.05	198.14	wt
G206C	L71F	amacGFP	139.68	10	338.089	4696.22	24.3396	L68F
A351T	T121S	amacGFP	1981.19	147	1179.89	9239.46	150.673	T117S
G33T:T562C	V14L:L191S	amacGFP	682.8	61	728.047	7979.6	66.426	V11L:L187S
G44C:G698A	M240I	amacGFP	27.35	4	714.497	8458.26	60.3559	M232I
G33T:G258A:G329T	V14L:A89T	amacGFP	31.92	4	416.93	7423.58	23.416	V11L:A86T
C71T:A226T:A402G	E78V:N138D	amacGFP	85.54	9	1375.13	7509.54	251.811	E75V:N134D
A13T:G33T:A508T	E7V:V14L:N173I	amacGFP	92.16	8	788.579	5702.22	109.055	E4V:V11L:N169I
C200T:A621T	S214C	amacGFP	32.74	3	1549.64	10872.1	220.877	S207C
T211C:A466T	F73S:K159M	amacGFP	56.76	4	1135.21	8330.21	154.702	F70S:K155M
A75G:A301G:C590A:A612T	K28E:Q104R:T211S	amacGFP	38.59	8	2051.37	13684.1	307.517	K25E:Q100R:T204S
C38T:A65T:A316T:T326C	Y109F	amacGFP	28.57	2	1505.1	9241.38	245.127	Y105F
G33T:T493C:A628T	V14L:F168S:D216V	amacGFP	34.61	2	305.812	827.037	113.08	V11L:F164S:D209V
G4A:A6G:T43A:T141A:T203C:G462A:C546G	S1N:K2E:L17Q:C50S:D158N:Q186E	amacGFP	27.05	5	0	449	0	S1N:K2E:L14Q:C47S:D154N:Q182E
G33T:C116T	V14L	amacGFP	659.39	57	1209.85	9047.41	161.786	V11L
G111C:A127C:A237G:A312G	D40H:E45A:M82V:K108E	amacGFP	50.82	6	1128.12	6818.03	186.659	D37H:E42A:M79V:K104E
G125T:G164T	wt	amacGFP	59.72	5	1253.06	9911.85	158.412	wt
G134A:T238A	M82K	amacGFP	47.29	3	277.625	8934.92	8.62632	M79K
A376T:A553G:T658A	K129M:N188S:F227Y	amacGFP	29.71	3	629.171	7743.73	51.1197	K125M:N184S:F219Y
G33T:G35A	V14L	amacGFP	550.69	46	1049.33	8467.2	130.041	V11L
C56T:G101T:A316T	E36D:Y109F	amacGFP	107.98	4	387.374	8746.01	17.1573	E33D:Y105F
C66T:C535G	H25Y:A182G	amacGFP	64.43	7	1967.97	8992.81	430.668	H22Y:A178G
C66T:T163C	H25Y:V57A	amacGFP	28.8	4	1177.71	3969.46	349.418	H22Y:V54A
T136A:C365T	F48Y	amacGFP	63.94	7	791.273	6288.53	99.5642	F45Y
C38A	wt	amacGFP	493.83	38	1083.57	9520.89	123.321	wt
G33T:C188A:C491G	V14L:N167K	amacGFP	47.48	5	1024.32	8387.69	125.091	V11L:N163K
A73T:G82A:C480A:G482A:A529T:C585T	H27L:S30N:L164I:Q180L:P199S	amacGFP	30.27	4	107.514	2708.99	4.26697	H24L:S27N:L160I:Q176L:P195S
T294C:A514T:C623T	F102L:E175V	amacGFP	61.7	6	1253.75	10269.3	153.068	F98L:E171V
G33T:A115G:T426A	V14L:Y41C:Y146N	amacGFP	62.02	10	1482.94	6034.95	364.395	V11L:Y38C:Y142N
A16T	E8V	amacGFP	665.56	58	1269.31	9210.39	174.928	E5V
A6T:A106T:G128A:T210C:T219A:A269T:A276G:A438G:A451G:A538T:C616G	K2*:D38V:F73L:Y76N:E93D:I96V:S150G:Y154C:D183V:A212G	amacGFP	104.68	6	69.2984	498.568	9.63214	K2*:D35V:F70L:Y73N:E89D:I92V:S146G:Y150C:D179V:A205G
G33T:G320A:A390G	V14L:K134E	amacGFP	39.24	4	641.644	6995.3	58.8549	V11L:K130E
A153G:C200T:C575T	K54E	amacGFP	71.04	4	1129.53	7888.85	161.726	K51E
A6G:C11T:A240G:T294A:A591T:A614T	K2E:N83D:F102I:N204Y	amacGFP	65.12	8	1168.8	9149.3	149.312	K2E:N80D:F98I:N197Y
A403T:G485A	N138I	amacGFP	32.08	3	1668.2	6116.29	454.996	N134I
T358A	V123E	amacGFP	368.74	58	1281.79	7355.34	223.374	V119E
G33T:A349G:C431T	V14L:D120G	amacGFP	30.48	4	1527.32	9467.27	246.395	V11L:D116G
G69A:T294A	G26S:F102I	amacGFP	57.06	11	1609.63	8527.82	303.819	G23S:F98I
G33T:A81T:T107A:A227C:G348A:T657A	V14L:S30C:D38E:E78D:D120N:F227I	amacGFP	40.59	3	1675.71	10191	275.535	V11L:S27C:D35E:E75D:D116N:F219I
G33T:G534A:G653C	V14L:A182T:M225I	amacGFP	33.36	5	499.525	623.092	400.463	V11L:A178T:M217I
G54T	D21Y	amacGFP	759.34	52	1105.93	8871.84	137.86	D18Y
C368A	wt	amacGFP	299.88	15	955.343	8853.28	103.09	wt
A112T:A405T	D40V:I139F	amacGFP	36.47	7	389.475	2612.63	58.0605	D37V:I135F
G33T:G682T	V14L:G235V	amacGFP	514.83	30	1023.68	8853.3	118.364	V11L:G227V
A144G	T51A	amacGFP	981.32	73	1339.3	9167.87	195.652	T48A
A403T	N138I	amacGFP	1370.49	107	1238.13	9013.3	170.078	N134I
G33T:G95T:A391T:A553C	V14L:E34D:K134M:N188T	amacGFP	37.66	8	500.718	898.315	279.098	V11L:E31D:K130M:N184T
G33T:G151A	V14L:G53D	amacGFP	562.76	54	1645	8018.48	337.473	V11L:G50D
C401T:T526A:G681.	V179E:H236I:T237L:H238T:G239A:M240W:D241T:E242S:L243C:Y244T:K245S	amacGFP	45.28	4	1155.79	9255.27	144.333	V175E:H228I:T229L:H230T:G231A:M232W:D233T:E234S:L235C:Y236T:K237S
T124A	L44Q	amacGFP	1106.94	77	623.301	4205.39	92.3826	L41Q
C152T:C260A:C352G:G357A	T121R:V123M	amacGFP	31.65	2	1232.65	6338.68	239.706	T117R:V119M
G35C:G88T:A349T:T426A:A603T	R32L:D120V:Y146N:S208C	amacGFP	68.88	12	879.348	5634.41	137.238	R29L:D116V:Y142N:S201C
A120C:T273G:C500T	K43Q:Y95D	amacGFP	30.64	4	35.4933	458.177	2.74953	K40Q:Y91D
A6T:G33T	K2*:V14L	amacGFP	787.18	68	133.292	506.502	35.0772	K2*:V11L
A24T:G33T:T46C:A484T:A646T	T11S:V14L:I18T:K165M:D223V	amacGFP	29.85	6	516.799	1528.33	174.754	T8S:V11L:I15T:K161M:D215V
T202C:A366G	I70T:I126V	amacGFP	166.28	10	513.922	8044.48	32.8319	I67T:I122V
G33T:T382C:G458A:G694T	V14L:M131T:M156I:G239V	amacGFP	194.97	14	1099.94	8593.04	140.797	V11L:M127T:M152I:G231V
G33T:A418T	V14L:K143M	amacGFP	785.79	48	1207.38	8560.85	170.284	V11L:K139M
G33T:C512T:A621T:C677T	V14L:S214C	amacGFP	68.47	4	509.712	7973.33	32.5844	V11L:S207C
C5T:A153C:A397G:A415T:A445G:T661A	K54Q:D136G:H142L:N152S:L228Q	amacGFP	64.88	7	1073.25	7042.03	163.57	K51Q:D132G:H138L:N148S:L220Q
G33T:A73G:T409A	V14L:H27R:L140Q	amacGFP	26.77	4	1068.32	8242.96	138.458	V11L:H24R:L136Q
G39A:G53A:T326G:C690A	V16I:H238N	amacGFP	124.47	10	1217.84	8466.32	175.179	V13I:H230N
A16G:C459T:A582T	E8G:P157S:I198F	amacGFP	153.12	12	916.511	7847.3	107.042	E5G:P153S:I194F
G33T:A438G:C512T	V14L:S150G	amacGFP	40.41	2	240.815	7696.81	7.53453	V11L:S146G
C347G:C408A	L140M	amacGFP	55.48	4	973.133	9699.21	97.6355	L136M
G33T:A76G:C83A:A132C:T556C:T680G:T708A	V14L:K28R:S30R:K47Q:V189A:C234W:Y244N	amacGFP	28.08	2	121.59	5715.92	2.5865	V11L:K25R:S27R:K44Q:V185A:C226W:Y236N
G14A:G33T:T203A:C501T:A691G	V14L:R171C:H238R	amacGFP	79.81	4	346.269	5885.3	20.3732	V11L:R167C:H230R
G286A:G399T:C408T	R99H:G137C	amacGFP	47.72	4	280.76	618.256	127.498	R95H:G133C
C476A:A664T	N162K:E229V	amacGFP	36.26	4	64.155	486.925	8.45277	N158K:E221V
G33T:T382C:G602A	V14L:M131T	amacGFP	126.96	11	732.615	8100.93	66.2548	V11L:M127T
G10T:A227T:C368T:A381G	G6V:E78D:M131V	amacGFP	49.86	5	548.12	8385.88	35.8263	G3V:E75D:M127V
G33T:A331T:A538T	V14L:E114V:D183V	amacGFP	32.04	3	586.593	8250.79	41.7041	V11L:E110V:D179V
A133T:A337G	K47M:K116R	amacGFP	51.24	3	150.319	7286.83	3.10092	K44M:K112R
T22C:C104T	F10S	amacGFP	26.33	7	639.981	2324.25	176.219	F7S
A174T:C264G	T61S:P92A	amacGFP	30.12	7	1171.2	5655.99	242.521	T58S:P88A
A129T:G182T	I46F	amacGFP	45.45	5	535.465	7207.07	39.7836	I43F
G28A:C308T:A403T:A614C	G12E:N138I	amacGFP	112.83	10	604.41	7454.96	49.0025	G9E:N134I
G9A:A16G:A30T:G33T:G258T:A490T:T493C	G6S:E8G:I13F:V14L:A89S:N167I:F168S	amacGFP	52.11	2	0	449	0	G3S:E5G:I10F:V11L:A86S:N163I:F164S
C289T	T100I	amacGFP	801.32	60	1249.88	8840.82	176.704	T96I
G33T:C148T:G182C	V14L:T52I	amacGFP	67.15	5	1639.07	7470.71	359.613	V11L:T49I
A685T	H236L	amacGFP	1065.33	87	1324.07	9872.67	177.578	H228L
G20T:A81T:C110A:G111A:A196C:A280T:A318C:A376G	S30C:D40N:Y68S:Q97L:K110Q:K129R	amacGFP	198.91	10	449.767	599.887	337.214	S27C:D37N:Y65S:Q93L:K106Q:K125R
C176A:T556A	V189D	amacGFP	52.69	5	623.805	8409.93	46.2707	V185D
A16G:A381T:G411A:A639T	E8G:M131L:G141R:T221S	amacGFP	74.28	2	375.094	8637.36	16.2892	E5G:M127L:G137R:T213S
G33T:C148G	V14L:T52S	amacGFP	91.94	4	854.586	8794.45	83.043	V11L:T49S
C89A	wt	amacGFP	155.61	12	1106.23	9157.32	133.635	wt
G713A	wt	amacGFP	661.13	41	1404.99	9592.22	205.79	wt
A436T:T658A	N149I:F227Y	amacGFP	29.77	4	67.4274	493.668	9.20952	N145I:F219Y
A16T:G33T:G105A	E8V:V14L:D38N	amacGFP	89.51	9	1948.72	8326.86	456.055	E5V:V11L:D35N
A366G	I126V	amacGFP	876.54	68	1400.85	10701.2	183.38	I122V
A174T:G698C	T61S:M240I	amacGFP	183.03	9	727.409	8267.21	64.0027	T58S:M232I
A436T	N149I	amacGFP	1314.04	94	379.819	2664.44	54.1437	N145I
G33T:A138T:A552T:A614T:T669C	V14L:I49F:N188Y:F231L	amacGFP	52.52	9	399.348	685.589	232.615	V11L:I46F:N184Y:F223L
A154G:A483G	K54R:K165E	amacGFP	60.08	7	1133.7	8422.48	152.601	K51R:K161E
T219A:G225A:G675A	Y76N:E78K:A233T	amacGFP	32.04	6	26.5487	453.982	1.55255	Y73N:E75K:A225T
C569G:A588T:T714C	D193E:I203F:*246R	amacGFP	58.26	3	211.347	8632.02	5.17461	D189E:I196F:*238R
G329T:A424T:C449T:A489G:A496G	E145V:N167D:K169R	amacGFP	67.41	4	1278.47	13738.8	118.969	E141V:N163D:K165R
A3C:G33T	S1R:V14L	amacGFP	140.74	11	1240.28	9023.61	170.474	S1R:V11L
A685G	H236R	amacGFP	731.21	55	1186.5	9493.21	148.295	H228R
A687T	T237S	amacGFP	1265.28	97	1277.33	9760.77	167.156	T229S
A541T	H184L	amacGFP	666.79	78	504.843	558.186	456.597	H180L
A115T:A366G:A424T:A495G:C533A:T556C:T562C	Y41F:I126V:E145V:K169E:V189A:L191S	amacGFP	62.55	3	309.419	6689.16	14.3127	Y38F:I122V:E141V:K165E:V185A:L187S
G33T:C460A	V14L:P157Q	amacGFP	51.68	9	1351.04	5629.12	324.263	V11L:P153Q
A3G:T450C:T670G	S1G:Y154H:F231C	amacGFP	132.71	8	258.516	1107.12	60.3643	S1G:Y150H:F223C
G53T:C317T:A349T:C558T	D120V:P190S	amacGFP	141.94	7	458.523	8345.29	25.1931	D116V:P186S
A100T:A231T:G359A:G400A:A472C:G513A	E36V:M80L:G137D:N161T:E175K	amacGFP	37.53	6	618.096	8071.32	47.3334	E33V:M77L:G133D:N157T:E171K
G33T:A376G:C469T	V14L:K129R:A160V	amacGFP	38.27	3	506.89	8584.69	29.9297	V11L:K125R:A156V
G28T:C677T:C690A	G12V:H238N	amacGFP	38.48	6	488.082	7438.13	32.0275	G9V:H230N
C257T:G286A:G462A:T493G	R99H:D158N:F168C	amacGFP	27.31	2	0	449	0	R95H:D154N:F164C
A81T:T543A:C617T:A691T	S30C:Y185N:H238L	amacGFP	121.94	4	968.165	9564.65	98.0009	S27C:Y181N:H230L
A73T:C416A	H27L:H142Q	amacGFP	76.61	4	455.795	8289.84	25.0607	H24L:H138Q
C317T	wt	amacGFP	206.49	25	1578.41	9609.29	259.268	wt
G33T:A268G	V14L:E93G	amacGFP	832.5	65	1023.58	8532.29	122.795	V11L:E89G
G33T:C149T:G458A	V14L:M156I	amacGFP	38.39	5	1244.72	7941.47	195.092	V11L:M152I
G33T:G344A:A381T:A403G:T511C	V14L:M131L:N138S:I174T	amacGFP	83.23	8	1292.68	6979.54	239.417	V11L:M127L:N134S:I170T
C80T:C161T:A424T:A444T:T557C	E145V:N152Y	amacGFP	88.01	8	1127.81	8421.16	151.044	E141V:N148Y
G33T:C599T	V14L	amacGFP	263.03	17	1143.38	9562.1	136.719	V11L
C62T:G258A	A89T	amacGFP	40.46	2	284.665	9285.73	8.72677	A86T
A121G:T657A	K43R:F227I	amacGFP	46.81	4	891.533	10100.5	78.6924	K40R:F219I
C317T:A429G:T708A	N147D:Y244N	amacGFP	28.23	3	423.972	9977.45	18.0159	N143D:Y236N
G29A:A435T:A495G:C569A	N149Y:K169E:D193E	amacGFP	99.58	9	491.404	2614.02	92.3777	N145Y:K165E:D189E
T163G:A402T	V57G:N138Y	amacGFP	31.93	5	273.785	2308.81	32.4662	V54G:N134Y
G33T:T232C	V14L:M80T	amacGFP	1030.8	87	768.642	4582.34	128.932	V11L:M77T
A120T:G150A:C300A	K43*:G53S:Q104K	amacGFP	26.81	3	581.347	6080.89	55.578	K40*:G50S:Q100K
A138T:C187G:A385G:A463G	I49F:T65S:D132G:D158G	amacGFP	46.51	5	1427.3	8139.24	250.29	I46F:T62S:D128G:D154G
A115G:C573A	Y41C:P195T	amacGFP	66.45	6	1137.48	9069.36	142.663	Y38C:P191T
G33T:A67T:G502T:C630A	V14L:H25L:R171L:R217S	amacGFP	109.03	6	396.441	5467.88	28.7433	V11L:H22L:R167L:R210S
A424T:A429G:T583A:A712G	E145V:N147D:I198N:K245R	amacGFP	90.28	5	462.536	7380.74	28.9861	E141V:N143D:I194N:K237R
A471G:A628C	N161D:D216A	amacGFP	34.28	5	1127.96	6102.97	208.473	N157D:D209A
C173T:C539G	D183E	amacGFP	64.29	5	642.488	11240.2	36.7247	D179E
A24T:A100G	T11S:E36G	amacGFP	37.87	6	1256.98	10167.9	155.391	T8S:E33G
G33T:C143T:C690A	V14L:H238N	amacGFP	36.31	2	78.9328	9328.86	0.667862	V11L:H230N
C260A:C324A:G458A:G581T:T657C	R112S:M156I:F227L	amacGFP	59.82	6	1018.48	8189.42	126.663	R108S:M152I:F219L
C259T:A269G:T706C	A89V:L243P	amacGFP	45.29	4	928.091	9246.3	93.1565	A86V:L235P
G33T:C620A	V14L	amacGFP	170.56	15	1539.43	9001.69	263.267	V11L
G33T:A538T:C616T:T706G	V14L:D183V:A212V:L243R	amacGFP	102.65	10	1005.69	9234.69	109.524	V11L:D179V:A205V:L235R
C110T:G515T	E175D	amacGFP	41.48	2	682.382	9875.82	47.15	E171D
G33T:G422A:A496T	V14L:K169M	amacGFP	126.36	7	651.557	7622.87	55.6911	V11L:K165M
T232C	M80T	amacGFP	1762.41	136	960.833	7008.75	131.721	M77T
A133G:A353G	K47R	amacGFP	105.9	6	338.246	7616.12	15.0221	K44R
G33T:T532C	V14L:L181P	amacGFP	730.2	67	993.561	8076.61	122.225	V11L:L177P
T358C:T657C	V123A:F227L	amacGFP	136.57	10	1319.2	10863.1	160.202	V119A:F219L
G27C:C289T:G551T	G12R:T100I	amacGFP	139.35	4	512.972	9166.31	28.7073	G9R:T96I
G33T:G86A:A115T:G302T:A397T	V14L:Y41F:Q104H:D136V	amacGFP	61.65	4	397.14	7684.9	20.5234	V11L:Y38F:Q100H:D132V
G33T:A269T:G332A:A394G:G458C	V14L:E93D:E135G:M156I	amacGFP	90.63	2	449.115	8647.99	23.3238	V11L:E89D:E131G:M152I
G33T:G213T:A240G	V14L:A74S:N83D	amacGFP	56.58	2	173.137	5276.31	5.68133	V11L:A71S:N80D
G335C:T667A	F230Y	amacGFP	68.97	9	629.198	7263.68	54.5027	F222Y
G33T:G468A:G604C	V14L:A160T:S208T	amacGFP	43.09	2	111.822	8284.26	1.50938	V11L:A156T:S201T
[truncated: 125,978 more rows]

## Sheet: aminoacid_genotypes
aa_genotype_pseudo	aa_genotype_native	gene	total_cell_count	n_replicates	replicates_mean_brightness
I13F:Q210L	I10F:Q203L	amacGFP	124.57	1	7606.85
K54E	K51E	amacGFP	1498.57	11	9017.31
K81M:I203T	K78M:I196T	amacGFP	50.96	1	8362.85
V14L	V11L	amacGFP	532672	878	9140.39
I13T:F148L	I10T:F144L	amacGFP	37.42	1	543.515
wt	wt	amacGFP	713559	1084	9348.32
V14L:L140M	V11L:L136M	amacGFP	1270.67	8	8848.12
V14L:F117I	V11L:F113I	amacGFP	755.42	6	8799.26
G6A:Y41N:M131T	G3A:Y38N:M127T	amacGFP	42.14	1	8566.05
K116R:M131L	K112R:M127L	amacGFP	85.87	1	8006.9
Y146F	Y142F	amacGFP	1459.38	5	9453.58
S30I	S27I	amacGFP	722.98	2	8867.23
M131I:Q210R	M127I:Q203R	amacGFP	69.08	1	9356.67
V14L:E175K	V11L:E171K	amacGFP	623.37	3	9645.39
V14E	V11E	amacGFP	1475.77	11	7075.78
H236Y	H228Y	amacGFP	1937.96	10	9150.86
V14L:N149S:E242V	V11L:N145S:E234V	amacGFP	41.24	1	4378.63
R112S:T121A:S208R	R108S:T117A:S201R	amacGFP	77.21	1	7583.75
K108E:K143E:N149I	K104E:K139E:N145I	amacGFP	26.98	1	1177.64
K47R:Y244C	K44R:Y236C	amacGFP	32.58	1	7699.62
E127D:N173I:H236Y	E123D:N169I:H228Y	amacGFP	49.01	1	4723.96
V14L:E135V	V11L:E131V	amacGFP	1144.22	9	9099.74
V14L:N149D:D193G:L207M:E229V:H238N	V11L:N145D:D189G:L200M:E221V:H230N	amacGFP	49.86	1	477.374
V14L:F168L	V11L:F164L	amacGFP	1503.31	7	3949.55
H238N	H230N	amacGFP	18550.3	89	9560.73
N152I	N148I	amacGFP	1547.45	9	12463.9
K108R:N149I:N161K:E175V:S208C	K104R:N145I:N157K:E171V:S201C	amacGFP	95.72	1	2643.99
N218S	N211S	amacGFP	793.32	6	8984.78
I101T	I97T	amacGFP	302.51	5	509.514
V14L:K165R	V11L:K161R	amacGFP	1004.12	3	9523.92
V14L:G130C:L243R	V11L:G126C:L235R	amacGFP	40.12	1	6179.44
V14L:Y154N	V11L:Y150N	amacGFP	604.79	7	8738.44
N83Y:G194S	N80Y:G190S	amacGFP	60.46	1	8406.49
N161D	N157D	amacGFP	579.34	4	8622.14
K134M:V179E	K130M:V175E	amacGFP	79.96	1	8642.93
D38V:D136Y:H238N	D35V:D132Y:H230N	amacGFP	48.69	1	6729.86
V14L:F168Y	V11L:F164Y	amacGFP	641.91	3	3339.24
V14L:E118A	V11L:E114A	amacGFP	209.97	2	7749.06
V14L:R99C	V11L:R95C	amacGFP	421.78	4	498.897
V14L:K87R:P92S:M156V:H205R	V11L:K84R:P88S:M152V:H198R	amacGFP	26	1	513.213
S1G:E118K:H151P:D193E	S1G:E114K:H147P:D189E	amacGFP	27.19	1	621.464
L9Q:A89T:E93K	L6Q:A86T:E89K	amacGFP	67.65	1	8083.39
D38E:S67A:L71M:C72G:K87M:E145V:F168S:D183N:N204S:H238Y	D35E:S64A:L68M:C69G:K84M:E141V:F164S:D179N:N197S:H230Y	amacGFP	43.2	1	512.653
K43M:T52A	K40M:T49A	amacGFP	42.93	1	7873.01
N124S:S214N:E229V:C234*	N120S:S207N:E221V:C226*	amacGFP	26.2	1	553.729
V14L:Y41F:M131V:I213F:Y244C	V11L:Y38F:M127V:I206F:Y236C	amacGFP	28.37	1	6692.94
K169M:K245E	K165M:K237E	amacGFP	40.16	1	8042.17
V14L:K159M:E229K:G235V	V11L:K155M:E221K:G227V	amacGFP	26.22	1	523.689
L122Q:M131L:I198M	L118Q:M127L:I194M	amacGFP	38.05	1	908.275
V14L:Y68N	V11L:Y65N	amacGFP	1066.41	5	483.538
V14L:C50S	V11L:C47S	amacGFP	1739.5	12	8579.48
K129M:N138D	K125M:N134D	amacGFP	36.61	1	7455.22
G22C:E78D:F117I:L197Q:H238R	G19C:E75D:F113I:L193Q:H230R	amacGFP	35.35	1	2970.82
H25N:K116N:Q210L:Y244C	H22N:K112N:Q203L:Y236C	amacGFP	93.98	1	5705.58
T211A	T204A	amacGFP	1735.37	9	1598.69
Q104R	Q100R	amacGFP	1041.62	7	9470.67
V63A:E118K:A160V:I170T	V60A:E114K:A156V:I166T	amacGFP	46.12	1	1522.45
P199H	P195H	amacGFP	819.87	4	2709.14
G6S:D23E:H25R:E36G:A39V:Q104H	G3S:D20E:H22R:E33G:A36V:Q100H	amacGFP	43.51	1	4101.22
V14L:S30R:V196E:N218I:F227L	V11L:S27R:V192E:N211I:F219L	amacGFP	46.67	1	6329.4
R112S:K116R	R108S:K112R	amacGFP	38.54	1	8119.67
V14L:F168Y:F231I:L243P	V11L:F164Y:F223I:L235P	amacGFP	67.61	1	1927.87
V14L:K47M:F148Y	V11L:K44M:F144Y	amacGFP	45.33	1	6029.72
F48L	F45L	amacGFP	3226.13	16	4777.94
V14L:D38G	V11L:D35G	amacGFP	1237.92	8	5974.91
V14L:R222S	V11L:R214S	amacGFP	423.35	2	8769.08
F103Y	F99Y	amacGFP	861.12	7	8120.72
E45D	E42D	amacGFP	894.78	9	8013.59
M156V	M152V	amacGFP	1955.55	11	9066.18
F227V	F219V	amacGFP	146.92	2	7146.77
V14L:K110R	V11L:K106R	amacGFP	1151.73	7	8674.87
D84N	D81N	amacGFP	711.34	7	7642
V14L:S88Y:H172L	V11L:S85Y:H168L	amacGFP	43.08	1	2598.24
V14L:V196A	V11L:V192A	amacGFP	1940.87	12	7983.93
G6A:I13V:K143M	G3A:I10V:K139M	amacGFP	31.08	1	10971.4
E8*:V14L:G94S:Q186L	E5*:V11L:G90S:Q182L	amacGFP	33.19	1	621.209
V14L:K129R:N138H:F231L	V11L:K125R:N134H:F223L	amacGFP	160.26	1	6799.04
F133I:G141R	F129I:G137R	amacGFP	84.83	1	10233.4
T100A:Y185F	T96A:Y181F	amacGFP	67.56	1	8209.65
N152S	N148S	amacGFP	2016	10	10279
E114V	E110V	amacGFP	2588.85	11	9313.19
H25L	H22L	amacGFP	2574.35	19	8725.89
I174T	I170T	amacGFP	1899.79	10	8878.21
Y244N	Y236N	amacGFP	923.53	5	9785.75
V123A	V119A	amacGFP	2950.45	17	8259.33
V14L:N152T:K169E:N173S:E175V	V11L:N148T:K165E:N169S:E171V	amacGFP	197.31	1	6967.55
C209S	C202S	amacGFP	1992.85	13	14547.6
E93D	E89D	amacGFP	2339.46	8	9733.01
L9Q:V14L:F102S:Y185N	L6Q:V11L:F98S:Y181N	amacGFP	81.44	1	8126.86
H27L:V63A:K87M:K116R	H24L:V60A:K84M:K112R	amacGFP	30.72	1	12945.1
V63M:N204I:H236D	V60M:N197I:H228D	amacGFP	42.72	1	607.021
P190S	P186S	amacGFP	512.9	9	8756.34
F103I:F133Y	F99I:F129Y	amacGFP	104.01	1	615.234
N147D	N143D	amacGFP	1222.79	9	9041.89
T51I:M156V	T48I:M152V	amacGFP	93.41	1	8585.91
E45V	E42V	amacGFP	2336.75	13	9954
T11S:C209Y	T8S:C202Y	amacGFP	70.94	1	2336.51
G22C	G19C	amacGFP	1394.18	6	7838.25
K28R	K25R	amacGFP	1783.9	9	9579.44
V14L:S30I	V11L:S27I	amacGFP	101.76	1	9235.54
V14L:K43Q:E127K	V11L:K40Q:E123K	amacGFP	33.53	1	8877.3
C50S:K108E	C47S:K104E	amacGFP	64.2	1	7923.16
Q104L:N161S:H172L:F231L	Q100L:N157S:H168L:F223L	amacGFP	34.4	1	8761.46
S30G:Y41F:M156R:N188D	S27G:Y38F:M152R:N184D	amacGFP	47.06	1	543.916
V14L:D120G	V11L:D116G	amacGFP	1406.95	10	9158.4
G12R:V14L:D23Y:E93Q	G9R:V11L:D20Y:E89Q	amacGFP	131.45	1	8453.33
V14L:F117I:K143N:N162S:V189A	V11L:F113I:K139N:N158S:V185A	amacGFP	34.22	1	7713.88
D21V	D18V	amacGFP	1708.73	10	9630.12
M156K	M152K	amacGFP	1159.6	7	9614.71
V14L:N204I	V11L:N197I	amacGFP	2780.53	8	8271.69
N188S	N184S	amacGFP	1089.57	9	1585.85
T61S	T58S	amacGFP	1088.84	8	8292.8
F73C	F70C	amacGFP	506.17	4	9235.6
K81T:N167S	K78T:N163S	amacGFP	77.58	2	9113.08
E127K	E123K	amacGFP	545.75	5	9586.52
V14L:F231Y	V11L:F223Y	amacGFP	710.81	5	774.813
V14L:H79L	V11L:H76L	amacGFP	1652.03	4	7746.15
E36G:K108M:M156I:D183Y:N188S:C234R	E33G:K104M:M152I:D179Y:N184S:C226R	amacGFP	106.02	1	767.613
K129N	K125N	amacGFP	519.37	5	9259.28
E145V	E141V	amacGFP	2283.14	10	7885.41
M80V:F102L:Q210L:F227L	M77V:F98L:Q203L:F219L	amacGFP	47.91	1	5217.24
V14L:Y244N	V11L:Y236N	amacGFP	763.93	4	9859.08
E8*:P56L:I96F:K165R:L191*:D223G:G239D:Y244N	E5*:P53L:I92F:K161R:L187*:D215G:G231D:Y236N	amacGFP	86.07	1	449
K28M:E78A:M82I	K25M:E75A:M79I	amacGFP	70.07	1	9113.92
N138D	N134D	amacGFP	1967.6	12	8669.57
V14L:R125H:Q210L	V11L:R121H:Q203L	amacGFP	41.25	1	6471.83
K110R:N167Y	K106R:N163Y	amacGFP	77.8	1	8576.06
V14L:R217C	V11L:R210C	amacGFP	999.95	8	8928.17
S67T:M90I:K215N	S64T:M87I:K208N	amacGFP	27.27	1	2119.79
V14L:R32L:Q210R	V11L:R29L:Q203R	amacGFP	26.91	1	11579.4
D21G	D18G	amacGFP	2173.15	13	8983.89
V14L:E135K	V11L:E131K	amacGFP	505.79	5	9506.4
V14L:H238N	V11L:H230N	amacGFP	14979	66	9158.35
A89G:H238L	A86G:H230L	amacGFP	70.29	1	6860.94
F10L:D38E:M156V:N204K:Q210R	F7L:D35E:M152V:N197K:Q203R	amacGFP	29.14	1	9824.07
T111S:I126T:L140M:F168Y:I203N:H236Y	T107S:I122T:L136M:F164Y:I196N:H228Y	amacGFP	29.34	1	552.724
V14L:L44Q:V166A	V11L:L41Q:V162A	amacGFP	88.66	1	6284.2
V14L:F73I	V11L:F70I	amacGFP	759.14	6	9684.28
V14L:E36V:L71S:S88Y:A160S:K245R	V11L:E33V:L68S:S85Y:A156S:K237R	amacGFP	40.3	1	464.263
K54R	K51R	amacGFP	2038.89	10	9360.5
A39V:T221I	A36V:T213I	amacGFP	29.25	1	9731.23
F227L	F219L	amacGFP	4807.26	23	11334.7
I126T	I122T	amacGFP	994.2	6	7630.94
V14L:H25L:E93G:E114V:N149S:S232N	V11L:H22L:E89G:E110V:N145S:S224N	amacGFP	118.5	1	2976.34
H25Q:K47E:V123M:C234V:H236M:T237L:H238T:G239A:M240W:D241S:E242S:L243C:Y244T:K245S	H22Q:K44E:V119M:C226V:H228M:T229L:H230T:G231A:M232W:D233S:E234S:L235C:Y236T:K237S	amacGFP	36.24	1	5526.04
V14L:I18V	V11L:I15V	amacGFP	683.95	3	9556.18
L181H:A212T	L177H:A205T	amacGFP	114.53	1	10344.2
F73S:A74T	F70S:A71T	amacGFP	26.02	1	485.33
V14L:S208I	V11L:S201I	amacGFP	417.54	2	9791.84
H142L	H138L	amacGFP	2231.45	12	7988
E78V	E75V	amacGFP	1532.98	10	9220.6
F168S	F164S	amacGFP	1186.92	7	520.911
D216A	D209A	amacGFP	321.48	3	8300.72
P60L:H238N	P57L:H230N	amacGFP	75.38	1	2384.18
V14L:Y185F	V11L:Y181F	amacGFP	645.33	7	9828.09
P199T	P195T	amacGFP	569.67	7	5429.9
V14L:S30C:F148L	V11L:S27C:F144L	amacGFP	41.23	1	497.592
Y68H	Y65H	amacGFP	1254.94	12	490.631
G12A:Q97H	G9A:Q93H	amacGFP	40.2	1	472.425
V24I:E114V:F117S:L228Q	V21I:E110V:F113S:L220Q	amacGFP	37.32	1	5232.31
V14L:N147K:N152K:G239S	V11L:N143K:N148K:G231S	amacGFP	96.98	1	10269.5
E34K	E31K	amacGFP	1456.52	4	8377.06
G12W:V14L:G113A	G9W:V11L:G109A	amacGFP	30.6	1	6008.87
D132N:E175G	D128N:E171G	amacGFP	65.07	1	9207.19
I70V:G119C:H236Y	I67V:G115C:H228Y	amacGFP	118.79	1	7154.12
V14L:K28E:S214I:F231I	V11L:K25E:S207I:F223I	amacGFP	40.28	1	10212.3
K110M:F168I	K106M:F164I	amacGFP	209.14	1	3500.04
G53D:A160D:N162S:D241G	G50D:A156D:N158S:D233G	amacGFP	136.01	1	9131.75
K2*:K54R:I155T	K2*:K51R:I151T	amacGFP	122.92	1	506.106
V14L:M240L	V11L:M232L	amacGFP	2690.51	9	9426.45
Q186H	Q182H	amacGFP	391.71	5	1804.06
N147S	N143S	amacGFP	1591.51	10	10200
V14L:E45G:M240L	V11L:E42G:M232L	amacGFP	136.6	1	8822.83
V14L:F227L	V11L:F219L	amacGFP	2333.78	16	10888.8
V14L:N204D	V11L:N197D	amacGFP	1001.22	7	9106.51
V14L:L191F	V11L:L187F	amacGFP	955.12	7	8096.63
A89T:K116R	A86T:K112R	amacGFP	53.34	1	8545.65
N83S	N80S	amacGFP	2474.55	14	9263.8
V189A:S208C	V185A:S201C	amacGFP	35.23	1	9651.68
E175K:F231L:G235W	E171K:F223L:G227W	amacGFP	30.75	1	6250.57
Y109F:E114V	Y105F:E110V	amacGFP	96.09	1	8394.39
V14L:G119V	V11L:G115V	amacGFP	428.42	4	7648.4
S1C:E45D:L243P	S1C:E42D:L235P	amacGFP	75.35	1	8242.6
V14L:F102I	V11L:F98I	amacGFP	1056.34	7	9890.61
R32H:E36G	R29H:E33G	amacGFP	124.03	1	9075.25
E93V	E89V	amacGFP	2570.87	6	9756.24
M156L:R171H:H238N	M152L:R167H:H230N	amacGFP	45	1	7148.23
E19V:L228Q	E16V:L220Q	amacGFP	75.01	1	7602.63
K134R:N147Y	K130R:N143Y	amacGFP	133.09	2	9188.09
E175K:Q210L	E171K:Q203L	amacGFP	44.04	1	7895.2
F10L:V14L	F7L:V11L	amacGFP	2628.95	14	7413.87
V14L:L62I:R125H:G239S	V11L:L59I:R121H:G231S	amacGFP	31.9	1	6955.54
D38V	D35V	amacGFP	1177.15	5	8638.02
F133L	F129L	amacGFP	2967.1	10	9387.35
K159R:E175V:D183Y	K155R:E171V:D179Y	amacGFP	37.42	1	11179
V14L:I96N	V11L:I92N	amacGFP	385.95	4	7086.76
K129E:H238N	K125E:H230N	amacGFP	117.57	1	8398.86
L55P:F102L:R171L:D183E:H238N	L52P:F98L:R167L:D179E:H230N	amacGFP	46.63	1	5376.6
D40N:T61A:N161D	D37N:T58A:N157D	amacGFP	29.25	1	2633.85
D120G	D116G	amacGFP	614.53	6	9256.22
K108E:H238N	K104E:H230N	amacGFP	221.16	3	8471.84
V14L:K134Q	V11L:K130Q	amacGFP	216.33	2	8901.14
K116R:G194V:E242V	K112R:G190V:E234V	amacGFP	45.54	1	7867.86
I46V:K134E:D183V:S208C	I43V:K130E:D179V:S201C	amacGFP	31.2	1	7604.94
V14L:H27L:M80I	V11L:H24L:M77I	amacGFP	83.65	1	7367.05
V14L:F168S	V11L:F164S	amacGFP	1171.26	12	479.684
N147S:I198F	N143S:I194F	amacGFP	185.08	1	8690.69
N218I	N211I	amacGFP	2308.79	8	9045.66
V14L:C50S:T61S:K108T	V11L:C47S:T58S:K104T	amacGFP	57.32	1	6897.49
V14L:F117Y:I203V	V11L:F113Y:I196V	amacGFP	100.12	1	7738.62
S30G:D40A:I70N:H151N:H172L	S27G:D37A:I67N:H147N:H168L	amacGFP	83.06	1	1874.88
N152I:N173Y	N148I:N169Y	amacGFP	105.71	1	9472.55
V14L:G163C:G194D	V11L:G159C:G190D	amacGFP	35.31	1	6853.6
V14L:V153A	V11L:V149A	amacGFP	1049.53	7	6605.5
V14L:M156K	V11L:M152K	amacGFP	1366.55	9	8999.49
H236R	H228R	amacGFP	1117.02	6	9418.28
E7V	E4V	amacGFP	1423.93	6	9179.33
T121I:D158Y	T117I:D154Y	amacGFP	27.58	1	6979.92
N173I:T211S	N169I:T204S	amacGFP	61.57	1	5964.25
V16I:Y41H:F48I:D106G:M156T	V13I:Y38H:F45I:D102G:M152T	amacGFP	33.68	1	955.741
G12W	G9W	amacGFP	1033.94	6	6928.5
V123M	V119M	amacGFP	693.81	4	8667.65
S30C	S27C	amacGFP	1820.25	14	9359.93
V14L:K108R	V11L:K104R	amacGFP	1028.95	9	8622.88
L71M	L68M	amacGFP	805.11	7	5066.47
V14L:Y68H	V11L:Y65H	amacGFP	827.79	9	480.132
E127G	E123G	amacGFP	1842.92	12	9547.41
V14L:V179A:I198F	V11L:V175A:I194F	amacGFP	40.64	1	5568.54
M225T	M217T	amacGFP	1343	8	3026.7
V14L:K108M	V11L:K104M	amacGFP	834.81	3	8840.85
V14L:E98V	V11L:E94V	amacGFP	29.05	1	8043.25
K2*:V14L:D132Y:N138Y:Y146N:E175V	K2*:V11L:D128Y:N134Y:Y142N:E171V	amacGFP	47.18	1	449
M82V	M79V	amacGFP	369.59	4	9695.69
V14L:T100A:K129N	V11L:T96A:K125N	amacGFP	33.75	1	7881.48
D120A	D116A	amacGFP	427.98	2	9846.46
M131I	M127I	amacGFP	1319.05	11	8916.52
L66M:K116R:G130C:A212T	L63M:K112R:G126C:A205T	amacGFP	31.45	1	5187.96
V189A	V185A	amacGFP	2756.83	11	9180.42
D21S:F231Y	D18S:F223Y	amacGFP	32.96	1	949.331
G6C:K134M	G3C:K130M	amacGFP	98.3	1	8575.47
G12R:V14L:E78V:G239A	G9R:V11L:E75V:G231A	amacGFP	99.11	1	8037.54
V14L:G194C	V11L:G190C	amacGFP	1030.69	7	8736.01
T11A:V14L:D40V:E242Q	T8A:V11L:D37V:E234Q	amacGFP	103.62	1	11843.4
K81R:S88T:H238D	K78R:S85T:H230D	amacGFP	52.48	1	7525.42
*246G	*238G	amacGFP	1969.96	8	9466.72
V14L:V57L	V11L:V54L	amacGFP	261.48	3	7387.61
G12R	G9R	amacGFP	1978.79	13	9044.33
V16I:M156V	V13I:M152V	amacGFP	37.18	1	8474.59
E45V:K81M	E42V:K78M	amacGFP	36.58	1	8000.72
V14L:R222H	V11L:R214H	amacGFP	826.84	4	8884.59
V14L:R171H	V11L:R167H	amacGFP	1178.78	7	6757.07
H79R:D183G:Y185F:M240V	H76R:D179G:Y181F:M232V	amacGFP	42.03	1	9484.87
V14L:K81M:H238L	V11L:K78M:H230L	amacGFP	54.42	1	9054.12
E7D:K165N	E4D:K161N	amacGFP	77.29	1	8410.24
V14L:N152D:Y154N	V11L:N148D:Y150N	amacGFP	55.01	1	7732.22
N204K	N197K	amacGFP	657.15	5	9363.44
V14L:L17V:N147I:S232R:G239D	V11L:L14V:N143I:S224R:G231D	amacGFP	61.47	1	8982.62
V14L:A89T	V11L:A86T	amacGFP	1140.99	12	9391.03
V14L:V16I:E34K	V11L:V13I:E31K	amacGFP	153.36	1	7700.29
S1G:D38G:F227I	S1G:D35G:F219I	amacGFP	51.05	1	8014.72
A39S:E118D	A36S:E114D	amacGFP	52.18	1	8304.64
K116R	K112R	amacGFP	2551.34	14	9384.66
V14L:M156I:S232R	V11L:M152I:S224R	amacGFP	35.56	1	10157.8
S67T	S64T	amacGFP	1295.45	15	6528.36
V14L:S30G	V11L:S27G	amacGFP	1048.16	7	8574.24
D23V:F102Y	D20V:F98Y	amacGFP	34.42	1	7570.59
I18M	I15M	amacGFP	174.65	2	5483.92
V14L:E36K	V11L:E33K	amacGFP	716.58	6	9565.61
E175D	E171D	amacGFP	1510.08	9	9324
T237A	T229A	amacGFP	1666.79	14	9150.48
V14L:V196M	V11L:V192M	amacGFP	677.19	5	7122.01
T61S:L144Q:K169E	T58S:L140Q:K165E	amacGFP	27.91	1	7929.28
V14L:N152Y	V11L:N148Y	amacGFP	1390.77	12	9431.04
V14L:C234S	V11L:C226S	amacGFP	1290.69	9	8398.41
F86L	F83L	amacGFP	2540.93	19	2928.6
Q210R	Q203R	amacGFP	2099.62	16	10643.5
Y68F:F227I	Y65F:F219I	amacGFP	41.76	1	480.107
V14L:F86Y:A160V:G194D	V11L:F83Y:A156V:G190D	amacGFP	28.93	1	5295.54
V14L:K159R	V11L:K155R	amacGFP	1190.26	6	9121.92
L9R:V14L	L6R:V11L	amacGFP	207.43	1	9181.76
M90T:Y244R	M87T:Y236R	amacGFP	39.14	1	2437.01
H27L:V153L:I213F	H24L:V149L:I206F	amacGFP	34.22	1	2909.25
T61A	T58A	amacGFP	2161.12	15	4501.39
V14L:G239C	V11L:G231C	amacGFP	718.62	3	8481.45
D216G	D209G	amacGFP	706.09	8	7808.22
I70M	I67M	amacGFP	51.37	1	7536.8
K2E:H25Y:K110M:L191S	K2E:H22Y:K106M:L187S	amacGFP	29.74	1	7474.96
Y154C	Y150C	amacGFP	695.75	6	7883.8
P60T:T65S:N83S:N162S:N204S:A212S	P57T:T62S:N80S:N158S:N197S:A205S	amacGFP	72.56	1	5113.22
Y95C	Y91C	amacGFP	1362.49	12	561.309
K108R:G194S:I203V	K104R:G190S:I196V	amacGFP	56.91	1	8678.15
V14L:N162S:D223E	V11L:N158S:D215E	amacGFP	29	1	7860.54
V14L:T211I	V11L:T204I	amacGFP	423.03	4	512.275
G53D	G50D	amacGFP	1054.72	4	8392.71
G12R:D84N	G9R:D81N	amacGFP	80.29	1	4855.33
V14L:Y244C	V11L:Y236C	amacGFP	946.35	8	9035.5
M80K:F86S:E127Q:D183Y:L191W	M77K:F83S:E123Q:D179Y:L187W	amacGFP	29.52	1	534.845
I70N:V189A	I67N:V185A	amacGFP	33.4	1	611.069
I155T:L243P	I151T:L235P	amacGFP	29.33	1	1983.96
V14L:L55P:F227L	V11L:L52P:F219L	amacGFP	31.08	1	7935.05
N124D:Y206C	N120D:Y199C	amacGFP	57.27	1	569.457
G235R	G227R	amacGFP	1206.06	7	9038.47
V63A	V60A	amacGFP	1756.33	11	2560.96
V14L:D23G:E36G:I96V:Q97*:K108R:E135V:V153D	V11L:D20G:E33G:I92V:Q93*:K104R:E131V:V149D	amacGFP	29.4	1	6296.97
H142Y:H238N	H138Y:H230N	amacGFP	162.98	1	9199.72
I13V:V14L:V189A	I10V:V11L:V185A	amacGFP	31.49	1	8887.54
E36G:I174T	E33G:I170T	amacGFP	35.53	1	8048.52
S30G:N188I	S27G:N184I	amacGFP	110.27	1	473.486
Y206F	Y199F	amacGFP	1120.6	7	9467.42
V14L:K54M	V11L:K51M	amacGFP	1636.2	9	8842.02
S1N	S1N	amacGFP	1740.6	6	9289.06
E7G	E4G	amacGFP	1447.29	10	9440.36
N147Y:S232R	N143Y:S224R	amacGFP	45.01	1	11884
Y41F:Q97H	Y38F:Q93H	amacGFP	27.33	1	449
H79Q:N83H:N161S	H76Q:N80H:N157S	amacGFP	139.12	1	9196.82
V14L:Y41H:A212G	V11L:Y38H:A205G	amacGFP	36.03	1	9292.1
T52N:S88Y:L181F	T49N:S85Y:L177F	amacGFP	102.08	1	8876.02
V14L:F29L:*246G	V11L:F26L:*238G	amacGFP	28.41	1	5422.97
V14L:V179A	V11L:V175A	amacGFP	1587.92	11	6705.75
K54E:N167Y:Q210K:T221S	K51E:N163Y:Q203K:T213S	amacGFP	41.04	1	11096.3
K47M:D132G	K44M:D128G	amacGFP	43.18	1	6231.79
V14L:N161K:N162Y:H238N	V11L:N157K:N158Y:H230N	amacGFP	65.31	1	8227.6
L197P	L193P	amacGFP	1812.52	10	7837.18
G192A	G188A	amacGFP	137.52	2	8993.5
M156K:R217H	M152K:R210H	amacGFP	40.1	1	9321.61
S1C:G192D:V196L	S1C:G188D:V192L	amacGFP	28.88	1	7228.62
V14L:H25R:E175Q	V11L:H22R:E171Q	amacGFP	173.96	1	7699.72
V14L:T111S	V11L:T107S	amacGFP	1721.95	10	4802.1
L17M:E19G:K129R:G192S	L14M:E16G:K125R:G188S	amacGFP	35.44	1	7179.05
G178W:V196A:H238L	G174W:V192A:H230L	amacGFP	37.03	1	8381.46
V14L:H142L	V11L:H138L	amacGFP	1261.4	9	7681.5
T11A:F103L:K116R:G141R	T8A:F99L:K112R:G137R	amacGFP	75.87	1	497.217
V14L:H27D:E78G	V11L:H24D:E75G	amacGFP	53.34	1	8028.98
Y68N:R171S:P190L	Y65N:R167S:P186L	amacGFP	34.23	1	476.767
V14L:A212T	V11L:A205T	amacGFP	1073.83	4	9899.81
V14L:F102I:R217H	V11L:F98I:R210H	amacGFP	130.15	1	10125.1
V14L:E135G	V11L:E131G	amacGFP	924.4	5	8439.15
E175V	E171V	amacGFP	1393.08	8	9520.69
G6D:V14L:S150G	G3D:V11L:S146G	amacGFP	36.69	1	4664.19
V196E	V192E	amacGFP	1601.85	8	4753.39
V14L:L62I:G192D	V11L:L59I:G188D	amacGFP	40.91	1	8062.49
K129M	K125M	amacGFP	1391.15	6	9632.73
K169M	K165M	amacGFP	1135.44	8	9081.96
V14L:Y109F:Y154C	V11L:Y105F:Y150C	amacGFP	84.87	1	8125.65
E8S:L9C:F10S:T11P:I13S:V14C:V16S:L17*:I18L:E19S:L20W:D21T:G22A:D23T:V24Y:H25T:G26A:H27T:K28S:F29S:S30A:V31C:R32A:G33A:E34R:G35A:E36R:G37A:D38M:A39P:D40T:Y41T:G42A:K43S:L44W:E45R:I46S:K47S:F48S:I49S:C50A:T51P:T52P:G53E:K54A:L55A:P56R:V57A:P58L:W59A:P60H:T61P:L62R:V63D:T64H:T65P:L66V:S67V:Y68R:G69L:I70F:L71V:C72L:F73R:R75L:Y76P:P77R:E78T:M80E:K81D:M82E:N83R:D84L:F85L:F86Q:K87V:S88R:A89H:M90A:P92R:E…	E5S:L6C:F7S:T8P:I10S:V11C:V13S:L14*:I15L:E16S:L17W:D18T:G19A:D20T:V21Y:H22T:G23A:H24T:K25S:F26S:S27A:V28C:R29A:G30A:E31R:G32A:E33R:G34A:D35M:A36P:D37T:Y38T:G39A:K40S:L41W:E42R:I43S:K44S:F45S:I46S:C47A:T48P:T49P:G50E:K51A:L52A:P53R:V54A:P55L:W56A:P57H:T58P:L59R:V60D:T61H:T62P:L63V:S64V:Y65R:G66L:I67F:L68V:C69L:F70R:R72L:Y73P:P74R:E75T:M77E:K78D:M79E:N80R:D81L:F82L:F83Q:K84V:S85R:A86H:M87A:P88R:E89…	amacGFP	26.11	1	511.484
V14L:F29I	V11L:F26I	amacGFP	130.34	1	6302.56
I13F:V14L	I10F:V11L	amacGFP	1919.34	10	8074.89
K47R:L71S:R171H:D193G	K44R:L68S:R167H:D189G	amacGFP	33.35	1	1047.84
K143T:Q180R	K139T:Q176R	amacGFP	249.77	1	4782.62
V14L:D23N:I70F	V11L:D20N:I67F	amacGFP	75.44	1	1495.86
G235V	G227V	amacGFP	2989.43	15	9322.44
I139V	I135V	amacGFP	825.6	5	9619.52
C234*	C226*	amacGFP	1460.64	10	6363.45
K47R:A182T	K44R:A178T	amacGFP	38.79	1	4772.72
T52A	T49A	amacGFP	1518.05	5	9276
N167S	N163S	amacGFP	1318.71	11	9033.33
M80L:L181P	M77L:L177P	amacGFP	41.45	1	8413.28
V14L:K47M:Y206F	V11L:K44M:Y199F	amacGFP	28.5	1	8042.9
V14L:S150G	V11L:S146G	amacGFP	1633.29	7	7173.73
I49V	I46V	amacGFP	830.25	6	9795.28
V14L:E118K:H142R:D241G	V11L:E114K:H138R:D233G	amacGFP	53.02	1	8428.92
V14L:D193Y	V11L:D189Y	amacGFP	984.83	6	9123.42
Y206C	Y199C	amacGFP	1020.34	6	9081.86
E127K:M156V	E123K:M152V	amacGFP	49.33	1	10018.1
V14L:K108N:L181H	V11L:K104N:L177H	amacGFP	192.17	1	9597.89
F133Y:V166A	F129Y:V162A	amacGFP	33.15	1	8892.5
K245E	K237E	amacGFP	1347.88	11	8981.41
F10L:T11P:I13S:V14C:V16S:L17*:I18L:E19S:L20W:D21T:G22A:D23T:V24Y:H25T:G26A:H27T:K28R:F29S:S30A:V31C:R32A:G33A:E34R:G35A:E36R:G37A:D38M:A39P:D40T:Y41T:G42A:K43S:L44W:E45R:I46S:K47S:F48S:I49S:C50A:T51P:T52P:G53A:K54S:L55C:V57C:W59G:P60L:T61P:L62S:V63*:T64P:T65P:L66C:S67R:Y68T:G69A:I70F:L71C:C72A:F73S:A74R:R75A:Y76T:E78N:H79T:M80*:K81R:M82*:N83T:D84T:F85S:F86S:K87S:S88P:A89P:M90C:E93K:G94A:Y95T:I96S…	F7L:T8P:I10S:V11C:V13S:L14*:I15L:E16S:L17W:D18T:G19A:D20T:V21Y:H22T:G23A:H24T:K25R:F26S:S27A:V28C:R29A:G30A:E31R:G32A:E33R:G34A:D35M:A36P:D37T:Y38T:G39A:K40S:L41W:E42R:I43S:K44S:F45S:I46S:C47A:T48P:T49P:G50A:K51S:L52C:V54C:W56G:P57L:T58P:L59S:V60*:T61P:T62P:L63C:S64R:Y65T:G66A:I67F:L68C:C69A:F70S:A71R:R72A:Y73T:E75N:H76T:M77*:K78R:M79*:N80T:D81T:F82S:F83S:K84S:S85P:A86P:M87C:E89K:G90A:Y91T:I92S:Q…	amacGFP	29.73	1	469.985
D193Y:N218I:H238R	D189Y:N211I:H230R	amacGFP	54.17	1	7810.5
E135V	E131V	amacGFP	1797.87	8	9442.17
H79R:N161D	H76R:N157D	amacGFP	27.08	1	7424.9
V14L:G163R	V11L:G159R	amacGFP	240.04	2	8623.99
V14L:T52S	V11L:T49S	amacGFP	1856.39	12	9109.61
A233G	A225G	amacGFP	348.33	3	7064.72
L55P	L52P	amacGFP	1866.24	7	8815.96
V14L:I139V	V11L:I135V	amacGFP	1009.53	7	9244.91
V14L:G178V	V11L:G174V	amacGFP	1964.26	8	10157.3
V14L:A233P	V11L:A225P	amacGFP	75.14	1	1881.39
E8S:L9C:F10S:T11P:I13S:V14S:V16S:L17*:I18L:E19S:L20W:D21T:G22A:D23T:V24Y:H25T:G26A:H27T:K28S:F29S:S30A:V31C:R32A:G33A:E34R:G35A:E36R:G37A:D38M:A39P:D40T:Y41T:G42A:K43S:L44W:E45R:I46S:K47S:F48S:I49S:C50A:T51P:T52P:G53A:K54I:L55C:V57C:W59G:T61P:L62S:V63*:T64P:T65P:L66C:S67R:Y68T:G69A:I70F:L71C:C72A:F73S:A74R:R75A:Y76T:E78N:H79T:M80*:K81R:M82*:N83T:D84T:F85S:F86S:K87S:S88P:A89P:M90R:E93K:G94A:Y95T:I…	E5S:L6C:F7S:T8P:I10S:V11S:V13S:L14*:I15L:E16S:L17W:D18T:G19A:D20T:V21Y:H22T:G23A:H24T:K25S:F26S:S27A:V28C:R29A:G30A:E31R:G32A:E33R:G34A:D35M:A36P:D37T:Y38T:G39A:K40S:L41W:E42R:I43S:K44S:F45S:I46S:C47A:T48P:T49P:G50A:K51I:L52C:V54C:W56G:T58P:L59S:V60*:T61P:T62P:L63C:S64R:Y65T:G66A:I67F:L68C:C69A:F70S:A71R:R72A:Y73T:E75N:H76T:M77*:K78R:M79*:N80T:D81T:F82S:F83S:K84S:S85P:A86P:M87R:E89K:G90A:Y91T:I92…	amacGFP	116.28	1	449
V14L:T237I	V11L:T229I	amacGFP	419.94	4	8948.82
Y41D:L71M:H142Y:S208N	Y38D:L68M:H138Y:S201N	amacGFP	140.3	1	3864.74
H27R	H24R	amacGFP	1672.7	15	9308.59
I198N:T237A	I194N:T229A	amacGFP	101.78	1	9165.94
A39V	A36V	amacGFP	419.7	2	8449.55
F73L:D193E	F70L:D189E	amacGFP	117.09	1	7438.77
V14L:H184Q:M240T	V11L:H180Q:M232T	amacGFP	31.25	1	5743.98
D132E	D128E	amacGFP	415.06	4	9621.9
H27L:Y185S	H24L:Y181S	amacGFP	124.61	1	9545.49
N83S:P195T	N80S:P191T	amacGFP	92.53	1	9268.01
Q104K	Q100K	amacGFP	1111.81	11	8594.56
K2M	K2M	amacGFP	1664.17	8	9042.07
V14L:Y41F	V11L:Y38F	amacGFP	1677.03	8	8777.75
N162K	N158K	amacGFP	388.18	6	9707.75
L9Q:V14L	L6Q:V11L	amacGFP	809.91	5	7782.06
I49T	I46T	amacGFP	846.05	7	9011.24
S30N:V196A:D241V	S27N:V192A:D233V	amacGFP	68.5	1	9051.16
K159E	K155E	amacGFP	1702.2	10	9246.43
V14L:D21V:S30G:T121S	V11L:D18V:S27G:T117S	amacGFP	99.07	1	7266.71
S1G:V14L:R32H:N173S	S1G:V11L:R29H:N169S	amacGFP	38.65	1	5145.5
T64N:K129M	T61N:K125M	amacGFP	30.95	1	465.561
F117Y:K134E:F227I:T237S	F113Y:K130E:F219I:T229S	amacGFP	50.72	1	11507.1
Y109C:T187M:H236Y	Y105C:T183M:H228Y	amacGFP	30.43	1	2598.6
Q210K	Q203K	amacGFP	1009.09	6	10338.9
V14L:A39P:T237I	V11L:A36P:T229I	amacGFP	51.07	1	9675.41
V14L:D136G	V11L:D132G	amacGFP	1972.01	5	8687.24
Q104K:M131T:D223H	Q100K:M127T:D215H	amacGFP	48.01	1	8095.33
D21V:E114Q:L197R:S214C	D18V:E110Q:L193R:S207C	amacGFP	43.5	1	8739.84
S1R	S1R	amacGFP	748.43	5	9476.34
V14L:V189F	V11L:V185F	amacGFP	120.46	1	8747.66
V14L:E118G:M156V	V11L:E114G:M152V	amacGFP	27.83	1	6484.4
E36K:D40G:V115A:K129R:V153I:V189I	E33K:D37G:V111A:K125R:V149I:V185I	amacGFP	36.74	1	467.536
S30R:G178W	S27R:G174W	amacGFP	59.78	1	11523.4
K81M:E135K	K78M:E131K	amacGFP	77.92	1	8383.84
N162I	N158I	amacGFP	2328.64	11	9029.06
T52N:V226I:L228Q	T49N:V218I:L220Q	amacGFP	88.7	1	8204.24
Y68F:M90R:H151L:M156K:N188T	Y65F:M87R:H147L:M152K:N184T	amacGFP	46.55	1	554.075
V14L:N83Y:D193V	V11L:N80Y:D189V	amacGFP	58.12	1	9825.45
F86Y:E242V	F83Y:E234V	amacGFP	64.41	1	9402.85
E36K	E33K	amacGFP	1509.76	9	9903.89
V14L:I46V:N204Y	V11L:I43V:N197Y	amacGFP	236.88	2	8731.39
N204I	N197I	amacGFP	1838.49	8	8407.99
P195T	P191T	amacGFP	1123.19	5	9406.14
K116M:I198N	K112M:I194N	amacGFP	174.89	2	8267.52
V14L:K165E:L243P	V11L:K161E:L235P	amacGFP	32.68	1	8554.13
S1G:V14L:L228Q	S1G:V11L:L220Q	amacGFP	31.15	1	7978.81
R112S	R108S	amacGFP	701.18	5	8494.15
V24I	V21I	amacGFP	890.76	10	8772.98
I213V	I206V	amacGFP	1234.28	6	11449.1
S1C:F133L:K134M:Y244F	S1C:F129L:K130M:Y236F	amacGFP	43.85	1	9235.4
E7*:V14L:K47N	E4*:V11L:K44N	amacGFP	76.2	1	572.495
T100A	T96A	amacGFP	2779.49	14	9219.3
V14L:H25L:P56L:K81R:K159E:M240T	V11L:H22L:P53L:K78R:K155E:M232T	amacGFP	30.09	1	6904.67
V14L:D216E	V11L:D209E	amacGFP	282.65	3	9019.08
V14A	V11A	amacGFP	3488.95	14	8610.85
D132V	D128V	amacGFP	275.09	2	8268.88
I170T:M240I	I166T:M232I	amacGFP	64.7	1	18164.1
V63A:N152I	V60A:N148I	amacGFP	33.44	1	3042.47
V14L:K108Q:V166A:D216G	V11L:K104Q:V162A:D209G	amacGFP	29.34	1	9553.87
V14A:M156I:M240T	V11A:M152I:M232T	amacGFP	119.75	1	8058.9
N162S	N158S	amacGFP	1117.19	9	9291.87
D158V	D154V	amacGFP	708.65	7	7046.71
H27L:A39V	H24L:A36V	amacGFP	114.29	1	8764.25
K81E:Y154N	K78E:Y150N	amacGFP	37.37	1	7812.32
V14L:A74S:N138S:M240K	V11L:A71S:N134S:M232K	amacGFP	42.9	1	7051.92
T11A:K54R:D183V:H238Y	T8A:K51R:D179V:H230Y	amacGFP	28.69	1	8108.1
M90T:T221A:E242G	M87T:T213A:E234G	amacGFP	29.01	1	2804.64
V14L:D40N:G192C	V11L:D37N:G188C	amacGFP	51.93	1	9208.03
V14L:E78V	V11L:E75V	amacGFP	872.02	8	8660.23
G178V	G174V	amacGFP	3294.39	13	11334.5
D23V:T52A	D20V:T49A	amacGFP	26.01	1	9978.93
E45D:Q210L	E42D:Q203L	amacGFP	65.54	1	6978.36
V14L:D183N	V11L:D179N	amacGFP	910.76	3	9642.98
F102L:H238R	F98L:H230R	amacGFP	56.86	1	9721.98
K2*:K47E:L71*:M90T:Y154H:N167I	K2*:K44E:L68*:M87T:Y150H:N163I	amacGFP	142.93	1	513.767
N83I	N80I	amacGFP	1578.89	9	8011.28
N147I:Y244N	N143I:Y236N	amacGFP	56.12	1	7829.35
V14L:F73I:A89T:D120Y:I174V	V11L:F70I:A86T:D116Y:I170V	amacGFP	61.65	1	7908.04
E78K:K87M:F102L:K108R:D132G:I203L	E75K:K84M:F98L:K104R:D128G:I196L	amacGFP	48.23	1	493.774
F10L:M131V:Y154H	F7L:M127V:Y150H	amacGFP	94.74	1	8324.41
F86Y	F83Y	amacGFP	1390.73	11	8361.21
V14L:E127K	V11L:E123K	amacGFP	593.88	2	9561.38
Y41F	Y38F	amacGFP	1604.59	10	9303.72
K2*:I13N:T64A:N167Y:H205D:G239D	K2*:I10N:T61A:N163Y:H198D:G231D	amacGFP	128.85	1	552.709
S67T:E93K	S64T:E89K	amacGFP	93.3	1	4100.18
H172L	H168L	amacGFP	4238.58	15	14879.8
D21N:I170T	D18N:I166T	amacGFP	119.24	1	17435.7
E127K:M156K:P157S	E123K:M152K:P153S	amacGFP	43.97	1	8893.25
V24A	V21A	amacGFP	1042.62	6	7637.01
P60L	P57L	amacGFP	371.59	3	2065.57
T11A:V14L:K28R:C234*	T8A:V11L:K25R:C226*	amacGFP	94.21	1	5087.18
G69S:H238N	G66S:H230N	amacGFP	42.31	1	449
V14L:Y68H:F133L	V11L:Y65H:F129L	amacGFP	87.3	1	522.28
V14L:H238Y	V11L:H230Y	amacGFP	679.9	4	8603.12
F10Y:T52A:A89T	F7Y:T49A:A86T	amacGFP	72.87	1	8680.29
K43M	K40M	amacGFP	1567.83	8	8230.97
V14L:T61S:Q210R:T237A	V11L:T58S:Q203R:T229A	amacGFP	181.82	1	9942.15
V14L:T121S	V11L:T117S	amacGFP	1854.13	12	8669.45
D120V:V123A	D116V:V119A	amacGFP	52.29	1	7859.73
I18T:H184L	I15T:H180L	amacGFP	45.36	1	449
V14L:E34D:E114V	V11L:E31D:E110V	amacGFP	26.01	1	8615.79
V14L:N124I:N167H	V11L:N120I:N163H	amacGFP	56.02	1	601.263
V14L:G53D:K110R	V11L:G50D:K106R	amacGFP	33.98	1	7661.32
I213F	I206F	amacGFP	892.47	2	7127.35
V14L:I213F	V11L:I206F	amacGFP	426.6	2	8193.43
V14L:E34D	V11L:E31D	amacGFP	1700.26	11	8022.6
F10Y	F7Y	amacGFP	1307.65	12	7182.3
V14L:K110T	V11L:K106T	amacGFP	93.58	2	9153.51
E8K:D21V:T51A:R171H	E5K:D18V:T48A:R167H	amacGFP	44.94	1	6683.7
D136E:D193E	D132E:D189E	amacGFP	133.13	1	9955.83
D183G	D179G	amacGFP	1424.25	8	9828.55
S30N:D158G:I203F	S27N:D154G:I196F	amacGFP	97.2	1	7863.35
L66M:A182V	L63M:A178V	amacGFP	54.4	1	2483.18
V14L:N161S:F231S	V11L:N157S:F223S	amacGFP	49.03	1	1610.73
A233T	A225T	amacGFP	872.18	8	6387.09
M80L	M77L	amacGFP	922.05	8	9500.37
V16I:V189I:T221I:H236R	V13I:V185I:T213I:H228R	amacGFP	104.48	1	9167.93
K116M:E127G:K134V	K112M:E123G:K130V	amacGFP	121.34	1	7358.76
H27N:H238N:M240K	H24N:H230N:M232K	amacGFP	164.26	1	10301.3
K81R:V179A:C234S:M240V	K78R:V175A:C226S:M232V	amacGFP	52.19	1	7392.09
V14L:F230Y:E242G	V11L:F222Y:E234G	amacGFP	63.71	1	7351.59
V14L:D183V	V11L:D179V	amacGFP	1154.37	13	8223.18
I49V:E175V:T237N	I46V:E171V:T229N	amacGFP	93.01	1	9923.23
V14L:S30R	V11L:S27R	amacGFP	804.27	7	8828.02
T121A:K165E:H238Y	T117A:K161E:H230Y	amacGFP	65.44	1	8651.98
V14L:G194D	V11L:G190D	amacGFP	583.87	6	9211.78
H25P:T237I	H22P:T229I	amacGFP	49.99	1	7247.11
S1N:Y41F	S1N:Y38F	amacGFP	92.61	1	9383.88
K2N:V14L:T65S:N149I	K2N:V11L:T62S:N145I	amacGFP	55.4	1	2595.4
V14L:Q104L:K159M	V11L:Q100L:K155M	amacGFP	116.97	1	8325.87
V14L:I198T	V11L:I194T	amacGFP	909.83	8	8798.75
K47E:P157T	K44E:P153T	amacGFP	27.41	1	6303.12
V14L:I49N	V11L:I46N	amacGFP	543.22	6	8123.58
V14L:M156V	V11L:M152V	amacGFP	1305.86	6	9280.39
N83S:N204Y:T237S	N80S:N197Y:T229S	amacGFP	36.11	1	8807.19
E45G:N149S:M156T	E42G:N145S:M152T	amacGFP	78.99	1	4453.94
T65S:E135K	T62S:E131K	amacGFP	93.49	1	11478.9
V14L:Y68C:R125H	V11L:Y65C:R121H	amacGFP	27.59	1	902.411
H27Y:T237S	H24Y:T229S	amacGFP	127.33	1	8167.04
D120V	D116V	amacGFP	3228.87	16	9467.6
V14L:E145G	V11L:E141G	amacGFP	842.28	4	10215.4
V14L:K165R:N188S	V11L:K161R:N184S	amacGFP	35.26	1	1528.8
N147Y:N167Y:G177C:Y244H	N143Y:N163Y:G173C:Y236H	amacGFP	60.32	1	8897.07
H25L:Y146H:D216V:G239D	H22L:Y142H:D209V:G231D	amacGFP	31.74	1	2618.13
V14L:K116R:N152K:Q186L:F231Y	V11L:K112R:N148K:Q182L:F223Y	amacGFP	28.2	1	570.808
N83S:E229G	N80S:E221G	amacGFP	69.07	1	452.032
V14L:K116R:T221S:H236L	V11L:K112R:T213S:H228L	amacGFP	34.98	1	9177.75
L20M:E36V	L17M:E33V	amacGFP	30.8	1	6849.9
V14L:E127G:N173I	V11L:E123G:N169I	amacGFP	67.05	1	5445.56
V14L:I174T	V11L:I170T	amacGFP	960.64	7	8658.05
V14L:C72S:N83S	V11L:C69S:N80S	amacGFP	39.43	1	2262.28
H25Y	H22Y	amacGFP	679.83	2	7835.32
V14L:N147K:E229D	V11L:N143K:E221D	amacGFP	31.31	1	642.408
V14L:N149S:K159M	V11L:N145S:K155M	amacGFP	32.37	1	4410.17
V14L:G178A	V11L:G174A	amacGFP	826.83	3	9975.99
V14L:M90L:L207M	V11L:M87L:L200M	amacGFP	81.5	1	3200.84
D21G:Y109F:D132G:A160T:L243Q	D18G:Y105F:D128G:A156T:L235Q	amacGFP	48.52	1	8529.76
Y185H:V196E	Y181H:V192E	amacGFP	56.01	1	6329.64
K108R:Y154F:E175K:M240L	K104R:Y150F:E171K:M232L	amacGFP	46.59	1	8076.22
V14L:E118K	V11L:E114K	amacGFP	790.98	6	8586.92
V196M	V192M	amacGFP	840.67	3	8415.43
D241V	D233V	amacGFP	972.26	11	8977.37
V14L:E145V	V11L:E141V	amacGFP	2083.92	8	7640.79
F10Y:V14L	F7Y:V11L	amacGFP	373.04	3	3750.79
V14L:Y206H:A212S	V11L:Y199H:A205S	amacGFP	55.58	1	8543.57
K2*:L9M:V14L:K43S:L44W:E45R:I46S:K47S:F48S:I49S:C50A:T51P:T52P:G53A:K54S:L55C:V57C:W59G:T61P:L62S:V63*:T64P:T65P:L66C:S67R:Y68T:G69A:I70S:L71C:C72A:F73S:A74R:R75A:Y76T:E78N:H79T:M80*:K81R:M82*:N83T:D84T:F85S:F86S:K87S:S88P:A89P:M90C:E93K:G94A:Y95T:I96S:Q97R:E98S:R99A:T100P:I101S:F102S:F103S:Q104R:D105T:D106T:G107A:K108S:Y109T:K110R:T111P:R112V:E114R:V115*:K116S:F117S:E118R:G119A:D120T:T121H:L122W…	K2*:L6M:V11L:K40S:L41W:E42R:I43S:K44S:F45S:I46S:C47A:T48P:T49P:G50A:K51S:L52C:V54C:W56G:T58P:L59S:V60*:T61P:T62P:L63C:S64R:Y65T:G66A:I67S:L68C:C69A:F70S:A71R:R72A:Y73T:E75N:H76T:M77*:K78R:M79*:N80T:D81T:F82S:F83S:K84S:S85P:A86P:M87C:E89K:G90A:Y91T:I92S:Q93R:E94S:R95A:T96P:I97S:F98S:F99S:Q100R:D101T:D102T:G103A:K104S:Y105T:K106R:T107P:R108V:E110R:V111*:K112S:F113S:E114R:G115A:D116T:T117H:L118W:V11…	amacGFP	51.15	1	468.155
E8*:V14L:V31M:P56H:Y76F:V226A:F230S	E5*:V11L:V28M:P53H:Y73F:V218A:F222S	amacGFP	48.31	1	449
V14L:F117L	V11L:F113L	amacGFP	2385.74	13	8717.38
E78V:E114V	E75V:E110V	amacGFP	45.18	1	8001.71
L20M	L17M	amacGFP	1374.4	10	8502
G176V	G172V	amacGFP	768.52	2	8579.17
N152Y:A160T	N148Y:A156T	amacGFP	53.68	1	9500.46
V14L:V196A:F231L	V11L:V192A:F223L	amacGFP	122.82	1	7182.31
G69D:E93V:M131V:K143R:F168C	G66D:E89V:M127V:K139R:F164C	amacGFP	28.6	1	449
I174N	I170N	amacGFP	1440.35	7	7725.67
Q104R:K165E	Q100R:K161E	amacGFP	28.48	1	8058.86
V14L:H79Q:I213V:N218S	V11L:H76Q:I206V:N211S	amacGFP	47.22	1	10882.7
I174V:H205Y:E242G	I170V:H198Y:E234G	amacGFP	60.82	1	2537.46
I198N	I194N	amacGFP	1623.19	8	8959.93
V14L:I96N:M131T	V11L:I92N:M127T	amacGFP	124.26	1	7492.66
F230I	F222I	amacGFP	1186.15	6	6760.27
V115A	V111A	amacGFP	2393.13	11	2097.64
L144Q	L140Q	amacGFP	844.67	4	8496.17
R112H:H172L:K245R	R108H:H168L:K237R	amacGFP	44.16	1	12079.7
V14L:Y185N	V11L:Y181N	amacGFP	1040.22	6	10143.6
Y41N	Y38N	amacGFP	763.16	6	8674.69
K108M	K104M	amacGFP	1746.2	10	9168.73
Y68H:G178W:*246.	Y65H:G174W:*238.	amacGFP	58.67	1	610.096
E34D:M80L:K110R:F231S	E31D:M77L:K106R:F223S	amacGFP	42.02	1	1548.58
I70T:N204S	I67T:N197S	amacGFP	159.38	1	7544.27
H184N	H180N	amacGFP	1488.53	8	5866.57
V14L:M131T:G177V:D193G	V11L:M127T:G173V:D189G	amacGFP	34.45	1	6465.27
N124D	N120D	amacGFP	1602.5	13	488.964
K2R:V14L:E45K:F102Y:K134N:G178W	K2R:V11L:E42K:F98Y:K130N:G174W	amacGFP	29.79	1	4927.18
V14L:V226A	V11L:V218A	amacGFP	1247.34	9	7927.39
V14L:V24A	V11L:V21A	amacGFP	397.41	1	6970.18
I13V:V14L:H27R:K116M	I10V:V11L:H24R:K112M	amacGFP	176.2	1	7961.37
T121S	T117S	amacGFP	2812.26	9	9217.33
I96N	I92N	amacGFP	1432.38	9	7653
G69D:H184Y	G66D:H180Y	amacGFP	28.8	1	662.05
I49V:T61A:P157A:N173Y	I46V:T58A:P153A:N169Y	amacGFP	37.23	1	541.149
K43R:P60T:K159N:V179L	K40R:P57T:K155N:V175L	amacGFP	28.33	1	7848.33
K47M:A160S:N161I:V226L	K44M:A156S:N157I:V218L	amacGFP	43.72	1	9145.5
G12V:V14L	G9V:V11L	amacGFP	801.46	4	7143.37
D136E	D132E	amacGFP	524.51	5	8970.13
V166A:I213T	V162A:I206T	amacGFP	26.75	1	12520.4
V14L:N149D:K245R	V11L:N145D:K237R	amacGFP	71.73	1	2967.79
D23N:D183Y	D20N:D179Y	amacGFP	93	1	11194.7
F133I:G141R:M240L	F129I:G137R:M232L	amacGFP	47.08	1	7949.19
V14L:C72S	V11L:C69S	amacGFP	1151.36	6	6309.86
E7V:T11A	E4V:T8A	amacGFP	169.73	1	8397.73
V14L:Q104R	V11L:Q100R	amacGFP	909.51	4	9608.11
D105G	D101G	amacGFP	1042.56	5	9114.08
L9P:K110R:D193G:R217H:H238N	L6P:K106R:D189G:R210H:H230N	amacGFP	44.4	1	4259.83
V14L:E34K	V11L:E31K	amacGFP	222.32	4	7976.02
Q104L:R171H:P195A:Q210H:A233D	Q100L:R167H:P191A:Q203H:A225D	amacGFP	34.61	1	470.284
P92S:D132Y	P88S:D128Y	amacGFP	32.29	1	4982.1
N188D	N184D	amacGFP	701.55	6	489.33
M131K	M127K	amacGFP	1284.24	9	8890.03
V14L:N124Y:R171L	V11L:N120Y:R167L	amacGFP	65.24	1	465.275
D21H:K47R:L207M	D18H:K44R:L200M	amacGFP	30.29	1	5824.45
Q180H	Q176H	amacGFP	723.9	4	10007.2
D223Y	D215Y	amacGFP	364.29	3	4575.5
I13T:V14L:E19G	I10T:V11L:E16G	amacGFP	36.48	1	6090.65
E7V:N167S:V179A	E4V:N163S:V175A	amacGFP	35.59	1	7610.09
G163C	G159C	amacGFP	1678.13	5	8080.58
I139V:D158E	I135V:D154E	amacGFP	92.09	1	7802.14
V14L:K81E:R99G	V11L:K78E:R95G	amacGFP	57.98	1	464.307
V14L:F48V:E93D	V11L:F45V:E89D	amacGFP	32.81	1	14458.9
L191W	L187W	amacGFP	472.73	5	8421.42
K134N:D193N:V196L	K130N:D189N:V192L	amacGFP	28.82	1	7941.72
N83T:T100N	N80T:T96N	amacGFP	44.75	1	5816.64
V14L:M131V:N149I:N152D	V11L:M127V:N145I:N148D	amacGFP	42.62	1	2139.99
V14L:E114V:V179E:D241V	V11L:E110V:V175E:D233V	amacGFP	41.85	1	7031.27
F10I:V14L:K28E	F7I:V11L:K25E	amacGFP	74.71	1	6139.58
I13V:V14L	I10V:V11L	amacGFP	725	5	9154.47
T221I	T213I	amacGFP	531.48	4	9218.84
V24I:I96T:D158G:G235E	V21I:I92T:D154G:G227E	amacGFP	103.07	1	5434.48
V14L:D223E:H236L	V11L:D215E:H228L	amacGFP	37.3	1	9347.87
V14L:M131L	V11L:M127L	amacGFP	1832.9	14	8500.74
S214I	S207I	amacGFP	769.32	7	11435.5
T11A:V14L	T8A:V11L	amacGFP	1236.37	5	9062.86
V14L:K165T	V11L:K161T	amacGFP	81.23	1	9078.49
I13F	I10F	amacGFP	4096.71	17	8994.69
K87R	K84R	amacGFP	1114.46	10	2073.52
E36K:V57M	E33K:V54M	amacGFP	83.14	1	5200.13
Q97L	Q93L	amacGFP	821.09	8	509.913
E36G	E33G	amacGFP	1631.76	9	9233.36
V14L:Y41*:Y154*	V11L:Y38*:Y150*	amacGFP	30.61	1	449
V14L:N167S	V11L:N163S	amacGFP	1667.68	5	8683.11
V14L:G177S	V11L:G173S	amacGFP	887.62	4	8505.57
M82K:H184N	M79K:H180N	amacGFP	54.56	1	5562.53
V14L:H172Y	V11L:H168Y	amacGFP	348.46	3	3266.66
E7V:V14L:T237S	E4V:V11L:T229S	amacGFP	79.62	1	9313.06
T187A:G235V	T183A:G227V	amacGFP	121.9	1	8345.32
V14L:H142Y	V11L:H138Y	amacGFP	556.19	4	7835.76
K28M	K25M	amacGFP	3153.28	19	8806.69
N138S:M156V:Q180R:Y244*	N134S:M152V:Q176R:Y236*	amacGFP	34.09	1	7459.08
E78G	E75G	amacGFP	1198.57	6	9484.56
V14L:E118D:V226A	V11L:E114D:V218A	amacGFP	47.61	1	7922.29
K165M:G192V	K161M:G188V	amacGFP	55.23	1	7929.39
E8K:D23N:Q210L	E5K:D20N:Q203L	amacGFP	39.37	1	7142.21
I13T:V14L:F48C	I10T:V11L:F45C	amacGFP	81.99	1	17092.8
L17M:G113E:D120G:V189E:H236L	L14M:G109E:D116G:V185E:H228L	amacGFP	36.13	1	449
F148S:E175D	F144S:E171D	amacGFP	36.29	1	735.847
F168I	F164I	amacGFP	2396.43	12	4763.7
D223E	D215E	amacGFP	3416.25	16	9359.68
G6C:V14L:E114V:S232R:C234R	G3C:V11L:E110V:S224R:C226R	amacGFP	30.21	1	7357.44
V14L:L17V:Q104E:Y185N	V11L:L14V:Q100E:Y181N	amacGFP	73.81	1	9240.83
V14L:E34G:K169Q:Q210L	V11L:E31G:K165Q:Q203L	amacGFP	33.27	1	7040.04
H238L	H230L	amacGFP	1637.97	13	9159.26
A212V	A205V	amacGFP	980.74	4	9711.15
N152D	N148D	amacGFP	1393.52	8	7706.59
L191M	L187M	amacGFP	1660	10	8752.46
I13N:V14L	I10N:V11L	amacGFP	197.55	2	8525.38
Q180K:I203T	Q176K:I196T	amacGFP	106.79	1	10957.2
V14L:N162I	V11L:N158I	amacGFP	1501.78	9	8549.03
V14L:D136G:H236Y	V11L:D132G:H228Y	amacGFP	33.78	1	9109.62
Y68N:Y109F	Y65N:Y105F	amacGFP	72.15	1	449
E19G	E16G	amacGFP	1347.83	9	7223.73
V14L:F73L:F85Y:M90L	V11L:F70L:F82Y:M87L	amacGFP	34.06	1	3372.23
E7*:V14L:H27L:V63A:K159*:M240L:L243V	E4*:V11L:H24L:V60A:K155*:M232L:L235V	amacGFP	59.8	1	603.273
V14L:Y146H	V11L:Y142H	amacGFP	582.56	3	6235.27
K159E:V166A:H172L	K155E:V162A:H168L	amacGFP	59.8	1	15252.6
K165R:H238N	K161R:H230N	amacGFP	45.41	1	8155.39
G6R:V14L:E175V	G3R:V11L:E171V	amacGFP	26.08	1	7320.34
V14L:D120G:M225V:H238N	V11L:D116G:M217V:H230N	amacGFP	35.1	1	1402.71
V14L:K134R:G178R:I203T:M240L	V11L:K130R:G174R:I196T:M232L	amacGFP	26.07	1	9897.04
V14L:M82K	V11L:M79K	amacGFP	541.05	5	9609.71
K129R:D136V	K125R:D132V	amacGFP	59.73	1	8512.48
V14L:K43R:Y68N:F73I:E145K:A212T:G239C	V11L:K40R:Y65N:F70I:E141K:A205T:G231C	amacGFP	67.97	1	627.092
T100A:K165R	T96A:K161R	amacGFP	40.83	1	9249.11
K2M:G130S:N167S:R222C	K2M:G126S:N163S:R214C	amacGFP	34.63	1	5163.03
V14L:R32S:D105G	V11L:R29S:D101G	amacGFP	67.86	1	7432.53
M80T	M77T	amacGFP	2028.5	8	6943.3
V14L:F48L	V11L:F45L	amacGFP	1613.25	9	7403.8
V14L:H238L	V11L:H230L	amacGFP	882.05	5	8880.1
V14L:T64S:H79L	V11L:T61S:H76L	amacGFP	46.78	1	4907.26
E45V:N138Y	E42V:N134Y	amacGFP	51.5	1	8641.69
V14L:K129R	V11L:K125R	amacGFP	1992.11	12	8882.92
M82I:N162I:V196A	M79I:N158I:V192A	amacGFP	39.05	1	7777.88
G137C:R171L	G133C:R167L	amacGFP	26.51	1	4998.35
Y146F:I170F:D223V	Y142F:I166F:D215V	amacGFP	27.75	1	698.277
A74T:D183E	A71T:D179E	amacGFP	34.98	1	4741.37
N83Y:K134R:N138I:M240V	N80Y:K130R:N134I:M232V	amacGFP	70.32	1	9035.43
Y68H:E127G	Y65H:E123G	amacGFP	50.23	1	449
S67T:N167K:R222H	S64T:N163K:R214H	amacGFP	53.93	1	5365.43
E98K	E94K	amacGFP	737.87	6	9213.89
E219D:L243P	E212D:L235P	amacGFP	100.98	1	9076.42
V14L:K143N	V11L:K139N	amacGFP	422.07	3	9205.07
V14L:H27L:E93K	V11L:H24L:E89K	amacGFP	53.61	1	8190.11
V14L:K143T	V11L:K139T	amacGFP	44.78	1	8685.63
V14L:N83D:Y146F:N152D:L207R:F230I:L243P	V11L:N80D:Y142F:N148D:L200R:F222I:L235P	amacGFP	41.43	1	527.439
N138D:A233V:M240V	N134D:A225V:M232V	amacGFP	174.56	1	6541.87
E114G	E110G	amacGFP	2586.37	11	8522.74
Y41F:V153A:F231L	Y38F:V149A:F223L	amacGFP	44.12	1	4835.55
M131K:V179E:G239D	M127K:V175E:G231D	amacGFP	63.4	1	7813.1
V14L:M131T	V11L:M127T	amacGFP	1191.14	5	9264.89
E98G:L243P	E94G:L235P	amacGFP	32.43	1	7612.86
V14A:H238N	V11A:H230N	amacGFP	270.92	2	8189.4
E135K	E131K	amacGFP	1147.56	5	9681.38
P199S	P195S	amacGFP	357.59	3	5764
Y154F:H238N	Y150F:H230N	amacGFP	28.12	1	7962.41
I203N	I196N	amacGFP	619.12	4	9585.48
I96F	I92F	amacGFP	1282.95	7	3665.74
E34Q:I139T	E31Q:I135T	amacGFP	29.29	1	6930.83
V14L:H25R	V11L:H22R	amacGFP	1761.02	6	7720.21
K2R:Y146C:K169R	K2R:Y142C:K165R	amacGFP	32.69	1	6653.84
V14L:P77T:E93G:N149D:N173I	V11L:P74T:E89G:N145D:N169I	amacGFP	29.43	1	449
K245M	K237M	amacGFP	604.74	4	8841.86
V14L:Y154F	V11L:Y150F	amacGFP	1275.71	7	9263.65
V14L:I70F:T221I	V11L:I67F:T213I	amacGFP	27.66	1	1272.63
D132N:V166A	D128N:V162A	amacGFP	260.03	1	11080.3
V24I:K43M	V21I:K40M	amacGFP	36.71	1	8127.71
F230L	F222L	amacGFP	1621	11	8388.3
K81Q	K78Q	amacGFP	152.41	1	8688.74
V14L:V16A:E19V:Y154H:G239C	V11L:V13A:E16V:Y150H:G231C	amacGFP	34.33	1	7362.67
E19K:Y146H:F231S	E16K:Y142H:F223S	amacGFP	67.25	1	511.631
V14L:M80K	V11L:M77K	amacGFP	173.07	1	2845.25
K28E:S30C:K81R	K25E:S27C:K78R	amacGFP	174.45	1	8762.23
K47M:T64A	K44M:T61A	amacGFP	27.98	1	2498.09
A160D	A156D	amacGFP	684.24	4	9018.02
K28T:E45G:E175A:S232G:M240I	K25T:E42G:E171A:S224G:M232I	amacGFP	142.23	1	8166.85
V14L:M131I:L191F:F230L	V11L:M127I:L187F:F222L	amacGFP	31.2	1	7018.99
*246W	*238W	amacGFP	331.73	1	9765.23
A212G	A205G	amacGFP	186.78	1	7979.15
K134M:I170V:L243Q	K130M:I166V:L235Q	amacGFP	26.02	1	16639
T65S:F133Y	T62S:F129Y	amacGFP	73.93	1	5804.18
V14L:N173H:F231C	V11L:N169H:F223C	amacGFP	63.89	1	741.029
V14L:H25R:H238N	V11L:H22R:H230N	amacGFP	28.49	1	9196.43
M240V	M232V	amacGFP	1273.86	5	9929.91
R125C:E145V:K165Q	R121C:E141V:K161Q	amacGFP	51.49	1	6226.36
N138Y:Y185N:S214C	N134Y:Y181N:S207C	amacGFP	160.06	1	9460.72
S30G:N161Y	S27G:N157Y	amacGFP	115.04	1	8200.18
G163S	G159S	amacGFP	1180.83	6	8528.29
V14L:T100S:S150G	V11L:T96S:S146G	amacGFP	65.65	1	6132.11
V226D	V218D	amacGFP	770.83	7	7654.14
G141W	G137W	amacGFP	2865.94	9	8054.09
I96T:M156I:A212T:D241G	I92T:M152I:A205T:D233G	amacGFP	58.03	1	4919.85
V14L:L243P	V11L:L235P	amacGFP	1520.87	8	9553.84
S150I	S146I	amacGFP	970.93	6	5091.34
E8*:I18T:E127V	E5*:I15T:E123V	amacGFP	64.85	1	529.012
V14L:E78D:S150G	V11L:E75D:S146G	amacGFP	87.94	1	6758.36
K169R	K165R	amacGFP	594.26	2	9531.11
E8*:V14L:G26D:G177T:V179C:Q180S:L181S:A182P:D183T:H184T:Y185T:Q186R:T187R:N188T:V189F:L191W:G192A:D193T:G194A:V196C:L197*:I198S:I203S:N204T:H205T:Y206T:L207*:S208A:C209V:Q210R:T211Q:A212P:I213S:S214A:D216T:R217V:N218T:E219R:T221L:R222A:D223I:H224T:M225W:V226S:L228W:E229S:F230S:F231L:S232V:A233P:C234V:H236I:T237L:H238T:G239A:M240W:D241T:E242S:L243C:Y244T:K245S	E5*:V11L:G23D:G173T:V175C:Q176S:L177S:A178P:D179T:H180T:Y181T:Q182R:T183R:N184T:V185F:L187W:G188A:D189T:G190A:V192C:L193*:I194S:I196S:N197T:H198T:Y199T:L200*:S201A:C202V:Q203R:T204Q:A205P:I206S:S207A:D209T:R210V:N211T:E212R:T213L:R214A:D215I:H216T:M217W:V218S:L220W:E221S:F222S:F223L:S224V:A225P:C226V:H228I:T229L:H230T:G231A:M232W:D233T:E234S:L235C:Y236T:K237S	amacGFP	66.25	1	452.234
M80V	M77V	amacGFP	1343.05	8	8386.42
E7A:E78V:N188D	E4A:E75V:N184D	amacGFP	33.54	1	458.17
V14L:S150C	V11L:S146C	amacGFP	1373.64	7	8310.77
N152D:I174T	N148D:I170T	amacGFP	28.01	1	6846.62
E118Q:D183Y:H184L:F231S	E114Q:D179Y:H180L:F223S	amacGFP	48.94	1	449
T121I	T117I	amacGFP	465.65	5	8806.69
V14L:K43M:E45V	V11L:K40M:E42V	amacGFP	151.71	2	8324.81
M80K	M77K	amacGFP	885.12	7	5523.25
A39D:F227L	A36D:F219L	amacGFP	81.79	1	5688.91
Y41F:S214G:K215E:Y244F	Y38F:S207G:K208E:Y236F	amacGFP	41.23	1	5664.06
V14L:N83S:D106G:F227L	V11L:N80S:D102G:F219L	amacGFP	36.1	1	8182.02
S208R	S201R	amacGFP	1074.04	6	10768.8
V14L:G37V	V11L:G34V	amacGFP	76.04	2	627.306
V16I:E34Q:D40G	V13I:E31Q:D37G	amacGFP	27.61	1	8856.19
M156I	M152I	amacGFP	1857.7	10	9304.15
I174F	I170F	amacGFP	677.74	6	7975.39
K2*:V14A:D23V:T51S:F168S:V196E:A212V	K2*:V11A:D20V:T48S:F164S:V192E:A205V	amacGFP	39.16	1	493.279
V14L:D241G	V11L:D233G	amacGFP	1227.28	12	9642.85
G137C	G133C	amacGFP	1727.54	8	8152.06
K28M:K47R	K25M:K44R	amacGFP	45.75	1	6896.18
N138S	N134S	amacGFP	717.66	8	8062.86
R32C:D223E:L243P	R29C:D215E:L235P	amacGFP	119.67	1	8166.71
V14L:H25L:F230I:M240L	V11L:H22L:F222I:M232L	amacGFP	34.89	1	6510.45
K165E:V179M	K161E:V175M	amacGFP	70.2	1	8806.66
E98V:A233V	E94V:A225V	amacGFP	37.77	1	6537.77
V14L:D105G:S150R:T187S	V11L:D101G:S146R:T183S	amacGFP	55.14	1	8939.66
V14L:N83D:N162D:V189I:D241E	V11L:N80D:N158D:V185I:D233E	amacGFP	38.89	1	3938.44
V14L:K47E:K169N	V11L:K44E:K165N	amacGFP	57.15	1	6412.36
V14L:G37R	V11L:G34R	amacGFP	62.63	1	469.414
V14L:K43R	V11L:K40R	amacGFP	834.03	4	8838.38
D38G	D35G	amacGFP	1653.12	9	7448.83
E36V:P92S:K108M	E33V:P88S:K104M	amacGFP	52.12	1	5150.57
I13T:V14L:V179E	I10T:V11L:V175E	amacGFP	32.32	1	7478.09
S1N:V14L	S1N:V11L	amacGFP	741.24	5	8982.37
K47E:I203N	K44E:I196N	amacGFP	66.74	1	7893.16
V14L:E93V:L191M	V11L:E89V:L187M	amacGFP	27.6	1	8038.46
E19K:H236P:M240L	E16K:H228P:M232L	amacGFP	71	1	8788.17
V14L:Y41H	V11L:Y38H	amacGFP	1006.57	4	8969.3
V14L:K116E	V11L:K112E	amacGFP	668.17	5	6938.03
F73Y:V166A	F70Y:V162A	amacGFP	118.43	1	9174.72
T11I:V14L:H79R:Y206H:Y244*	T8I:V11L:H76R:Y199H:Y236*	amacGFP	44.68	1	7912.47
V14L:E114V	V11L:E110V	amacGFP	576.95	1	9362.08
D193V	D189V	amacGFP	2123.19	11	9399.36
E45G	E42G	amacGFP	1101.71	5	10064.6
K215I	K208I	amacGFP	2409.49	14	9135.47
V14L:G141A	V11L:G137A	amacGFP	321.95	3	9334.79
V14L:G141V:L181H	V11L:G137V:L177H	amacGFP	35.41	1	6467.86
K54E:G192V	K51E:G188V	amacGFP	86.52	1	8425.14
A39S:T52A:G194V:H236Q	A36S:T49A:G190V:H228Q	amacGFP	99.05	1	7639.76
V14L:G235W	V11L:G227W	amacGFP	1339.8	7	8314.59
H151L	H147L	amacGFP	370.08	6	690.427
K169R:Q180L:D183N	K165R:Q176L:D179N	amacGFP	49.93	1	11237
V14L:F133L:A160T:I174T	V11L:F129L:A156T:I170T	amacGFP	64.12	1	7034.38
V14L:E45Q:L181P	V11L:E42Q:L177P	amacGFP	62.46	1	8064.16
L17P:P60S:Y95F:I155T:Y185N:P199T:H205N:E219G	L14P:P57S:Y91F:I151T:Y181N:P195T:H198N:E212G	amacGFP	29.69	1	2652.32
V14L:T61S:T100A:K108M:N204Y	V11L:T58S:T96A:K104M:N197Y	amacGFP	42.52	1	7262.88
S30C:N138Y	S27C:N134Y	amacGFP	193.34	1	7681.54
V14L:T51S:D241N	V11L:T48S:D233N	amacGFP	29.11	1	8148.37
G12R:V14L:E36D	G9R:V11L:E33D	amacGFP	35.21	1	8301.69
F48Y	F45Y	amacGFP	1004.81	6	5986.37
V14L:V189A	V11L:V185A	amacGFP	1260.03	7	9348.64
K159M	K155M	amacGFP	1413.91	12	9397.35
R171L	R167L	amacGFP	287.25	2	6612.77
K2*:G42S:E127G:N149S:F231L	K2*:G39S:E123G:N145S:F223L	amacGFP	79.59	1	600.586
N149S	N145S	amacGFP	818.11	8	4221.8
S150C	S146C	amacGFP	881.57	5	8854.51
K134N:K169R:Q210R	K130N:K165R:Q203R	amacGFP	160.06	1	9969.71
K2R	K2R	amacGFP	1546.64	9	9296.89
I13F:G192C:M240L	I10F:G188C:M232L	amacGFP	29.03	1	7389.65
K116E:S208R	K112E:S201R	amacGFP	33.4	1	7288.7
V166A	V162A	amacGFP	2034.36	17	10726.3
V14L:G141E:H172L	V11L:G137E:H168L	amacGFP	30.78	1	10633.6
V14L:H238N:G239C	V11L:H230N:G231C	amacGFP	36.43	1	9140.13
M90L:G141R	M87L:G137R	amacGFP	142.58	1	8984.78
V14L:N167D:D223E	V11L:N163D:D215E	amacGFP	64.33	1	8462.72
V14L:D120V:H238N	V11L:D116V:H230N	amacGFP	459.33	3	8585.51
V14L:L197P:V226D	V11L:L193P:V218D	amacGFP	26.43	1	3755.9
V14L:G130C	V11L:G126C	amacGFP	509.7	5	6229.14
V14L:E127V	V11L:E123V	amacGFP	1748.69	9	9569.8
K54T	K51T	amacGFP	520.8	3	9117.56
Y244C	Y236C	amacGFP	1292.53	10	9164.91
E19V	E16V	amacGFP	1840.9	12	9605.91
V14L:Y206H	V11L:Y199H	amacGFP	839.85	5	9162.93
V14L:M225L	V11L:M217L	amacGFP	723.56	6	3841.54
G137C:F227L	G133C:F219L	amacGFP	41.7	1	7365.17
K2M:N83I:M156V:P199T:R217S	K2M:N80I:M152V:P195T:R210S	amacGFP	67.67	1	1678.98
E7G:A89T:K165R:Q210R	E4G:A86T:K161R:Q203R	amacGFP	76.72	1	10536.2
V14L:E36G:I70F:H142R:K159E:F230I	V11L:E33G:I67F:H138R:K155E:F222I	amacGFP	47.8	1	1130.68
V14L:E34K:Y154N	V11L:E31K:Y150N	amacGFP	135.67	1	8014.74
K2N:G178W	K2N:G174W	amacGFP	33.23	1	9672.04
K2R:E7V:A74V:Q104L:N162D:L164P	K2R:E4V:A71V:Q100L:N158D:L160P	amacGFP	32.52	1	458.457
K47N:E229G	K44N:E221G	amacGFP	105.56	1	495.227
V189I	V185I	amacGFP	676.34	8	8874.51
K54R:G178R	K51R:G174R	amacGFP	257.69	1	9675.32
E34Q:E36G	E31Q:E33G	amacGFP	30.96	1	8461.12
S214N:H238N	S207N:H230N	amacGFP	232.84	3	8640.48
V14L:N173I	V11L:N169I	amacGFP	1550.58	10	6046.02
V14L:N218I:H238N	V11L:N211I:H230N	amacGFP	31.04	1	9505.86
G235E	G227E	amacGFP	862.14	4	9716.84
V14L:H172L	V11L:H168L	amacGFP	2007.07	5	14306.4
Y41N:L181F:Q210L:E229G:H238P	Y38N:L177F:Q203L:E221G:H230P	amacGFP	80.85	1	449
D216V:L243V	D209V:L235V	amacGFP	86.79	1	10912.8
D38H:K108M:H238Y	D35H:K104M:H230Y	amacGFP	97.63	1	7768.11
V14L:K129N:E242V	V11L:K125N:E234V	amacGFP	76.9	1	8629.84
G6D:V14L	G3D:V11L	amacGFP	425.16	2	8014.63
K169E:N188I	K165E:N184I	amacGFP	47.6	1	449
V14L:T121S:N147S	V11L:T117S:N143S	amacGFP	183.77	1	8881.04
D38V:G69D:S214G	D35V:G66D:S207G	amacGFP	52.92	1	462.311
M90L	M87L	amacGFP	1379.43	10	9571.6
V14L:E36V	V11L:E33V	amacGFP	1418.13	10	9418.46
F117L:G194S	F113L:G190S	amacGFP	68.96	1	7477.75
E8*	E5*	amacGFP	1188.18	5	514.094
V14L:K47R	V11L:K44R	amacGFP	1865.07	9	7815.82
V14L:N167I	V11L:N163I	amacGFP	859.5	7	8507.79
V14L:D21E	V11L:D18E	amacGFP	496.24	4	8912.82
V14L:I139M	V11L:I135M	amacGFP	43.46	1	7179.27
K129E	K125E	amacGFP	1213.18	6	9104.19
V14L:D21N:T52A:H238N	V11L:D18N:T49A:H230N	amacGFP	26.18	1	9510.4
T51S:V189A:L197P:Y244*	T48S:V185A:L193P:Y236*	amacGFP	109.92	1	6938.49
E7*:E98D:N218I	E4*:E94D:N211I	amacGFP	140.94	1	451.037
V14L:F102L	V11L:F98L	amacGFP	2000.63	10	9188.33
V14L:I198F	V11L:I194F	amacGFP	2929.66	13	8258.44
E135D	E131D	amacGFP	1087.63	6	9230.76
E242V	E234V	amacGFP	1547.38	6	9379.55
V14L:K47E	V11L:K44E	amacGFP	506	10	6864.18
V14L:T211A:F230L	V11L:T204A:F222L	amacGFP	34.36	1	2446.69
V14L:N124S:H238Q	V11L:N120S:H230Q	amacGFP	40.2	1	5014.13
F73C:N218S	F70C:N211S	amacGFP	36.94	1	8528.25
H142D	H138D	amacGFP	28.66	1	8986.97
D38N:F117Y:D136N:N218S	D35N:F113Y:D132N:N211S	amacGFP	49.79	1	7631.42
V14L:R99H:V166A	V11L:R95H:V162A	amacGFP	26.69	1	457.999
F29I:K110M:L181I:T221A:H238N	F26I:K106M:L177I:T213A:H230N	amacGFP	26.66	1	8441.82
V14L:E98V:Q180L:M240K	V11L:E94V:Q176L:M232K	amacGFP	34.79	1	7156.47
K2*:V14L:F29Y:Y68*:I203S:N204T:H205T:Y206T:L207*:S208A:C209V:Q210R:T211Q:A212P:I213S:S214A:D216T:R217V:N218T:E219R:T221L:R222A:D223I:H224T:M225W:V226S:L228W:E229S:F230S:F231L:S232V:A233P:C234V:H236I:T237L:H238T:G239A:M240W:D241T:E242S:L243C:Y244T:K245S	K2*:V11L:F26Y:Y65*:I196S:N197T:H198T:Y199T:L200*:S201A:C202V:Q203R:T204Q:A205P:I206S:S207A:D209T:R210V:N211T:E212R:T213L:R214A:D215I:H216T:M217W:V218S:L220W:E221S:F222S:F223L:S224V:A225P:C226V:H228I:T229L:H230T:G231A:M232W:D233T:E234S:L235C:Y236T:K237S	amacGFP	67.38	1	524.273
V14L:I49F:K54E:D193G	V11L:I46F:K51E:D189G	amacGFP	147.36	1	7401.88
E36V:M156T:M225I	E33V:M152T:M217I	amacGFP	49.4	1	574.588
D40V	D37V	amacGFP	830.59	4	9008.56
D38Y:D216G	D35Y:D209G	amacGFP	82.88	2	6459.65
T61A:K116M:F168S	T58A:K112M:F164S	amacGFP	27.63	1	482.764
V14L:M82I:D132G:E145K:Y185F:T237I	V11L:M79I:D128G:E141K:Y181F:T229I	amacGFP	63.73	1	8288.92
Y109F:F168S	Y105F:F164S	amacGFP	54.56	1	474.393
V14L:P190L	V11L:P186L	amacGFP	394.76	3	6026.39
L122M	L118M	amacGFP	462.09	5	8207.75
T61S:R99H:D132Y:S208R	T58S:R95H:D128Y:S201R	amacGFP	46.93	1	595.741
I198F	I194F	amacGFP	2842.51	15	8862.93
M156T:S214C	M152T:S207C	amacGFP	59.17	1	8621.54
K43M:G178W:K245R	K40M:G174W:K237R	amacGFP	153.69	1	8128.9
V14L:N173I:L191F	V11L:N169I:L187F	amacGFP	58.18	1	4376.91
V14L:A160T	V11L:A156T	amacGFP	385.1	1	9485.52
L9R:V14L:Q104L:V179E	L6R:V11L:Q100L:V175E	amacGFP	55.69	1	6826.17
E7V:E36K	E4V:E33K	amacGFP	31.74	1	9694.1
V14L:T211A	V11L:T204A	amacGFP	1195.39	6	1775.29
E145G:H184L:I203F	E141G:H180L:I196F	amacGFP	29.06	1	694.073
V14L:I198N	V11L:I194N	amacGFP	948.96	8	7801.27
V14L:E45K:K47M	V11L:E42K:K44M	amacGFP	46.75	1	5417.55
E34G	E31G	amacGFP	1787.27	8	7280.2
V14L:F73V:N152Y:L197Q:H238L	V11L:F70V:N148Y:L193Q:H230L	amacGFP	37.09	1	9623
L17M:E78K:V115L:K169E	L14M:E75K:V111L:K165E	amacGFP	34.13	1	5206.73
T52S:E135V	T49S:E131V	amacGFP	46.52	1	8278.5
V14M:H142R	V11M:H138R	amacGFP	86.87	1	8294.79
A74V:N138I	A71V:N134I	amacGFP	35.45	1	3879.48
K159R	K155R	amacGFP	985.69	9	9283.29
K54M	K51M	amacGFP	2213.66	13	9288.99
E8V:V14L:Y185N	E5V:V11L:Y181N	amacGFP	94.29	1	9307.67
V14L:G119S:Y146F:L181P	V11L:G115S:Y142F:L177P	amacGFP	33.41	1	7900.21
E127V:N147I	E123V:N143I	amacGFP	29.32	1	8181.6
D23N:H27R:V31A:F73L:I170N	D20N:H24R:V28A:F70L:I166N	amacGFP	26.64	1	8225.45
E8V:T64A	E5V:T61A	amacGFP	29.17	1	1066.76
M225V	M217V	amacGFP	899.03	4	1006.63
V14L:F103Y:Q210L:G235V	V11L:F99Y:Q203L:G227V	amacGFP	104.54	1	6108.69
I96T:K134E	I92T:K130E	amacGFP	53.64	1	8539.13
V14L:M90L	V11L:M87L	amacGFP	1132.39	7	8667.18
I170V	I166V	amacGFP	822.71	7	16221.5
D38Y:M82V:G178R	D35Y:M79V:G174R	amacGFP	133.8	1	8925.94
M82I	M79I	amacGFP	2124.83	15	9268.72
I13T:V14L:V226A	I10T:V11L:V218A	amacGFP	34.56	1	7784.01
I170V:L181P	I166V:L177P	amacGFP	64.55	1	16428.5
Q104K:Y206H:H238Y	Q100K:Y199H:H230Y	amacGFP	91.82	1	7494.84
M156L:H238N:M240L	M152L:H230N:M232L	amacGFP	55.33	1	10065.3
K47M	K44M	amacGFP	2761.83	11	7592.8
T51I:R112C:E145G	T48I:R108C:E141G	amacGFP	56.62	1	4918.7
K108E	K104E	amacGFP	2265.2	12	8813.5
V14L:M240L:*246R	V11L:M232L:*238R	amacGFP	101.48	1	9120.78
G130A	G126A	amacGFP	299.85	2	7932
V14L:K165E:H238N	V11L:K161E:H230N	amacGFP	140.98	1	7928.43
F85Y	F82Y	amacGFP	1183.41	8	9207.14
S30G	S27G	amacGFP	2959.94	10	8959.41
V153I	V149I	amacGFP	888.61	6	7846.02
N83S:N147S:K159M:I198T:Q210L:T237S	N80S:N143S:K155M:I194T:Q203L:T229S	amacGFP	69.58	1	4681.7
D23N:H25R:I96S:V179M:V189I:N204S	D20N:H22R:I92S:V175M:V185I:N197S	amacGFP	30.14	1	7988.68
N218I:F230L	N211I:F222L	amacGFP	31.17	1	8273.48
G119C	G115C	amacGFP	1586.25	9	8908.62
H27L	H24L	amacGFP	3552.37	15	9371.57
I46F	I43F	amacGFP	3138.31	10	7257.58
C50S	C47S	amacGFP	3539.29	23	8808.25
V14L:I203N	V11L:I196N	amacGFP	1095.69	7	9266.74
V14L:M131I	V11L:M127I	amacGFP	1369.14	9	8689.02
L71S:G119C	L68S:G115C	amacGFP	93.02	1	1851.89
V14L:A74V	V11L:A71V	amacGFP	980.42	4	5300.36
V14L:D136N:V179A	V11L:D132N:V175A	amacGFP	64.01	1	6977.53
V14L:D136V:F231S	V11L:D132V:F223S	amacGFP	46.23	1	1418.39
M80L:N138Y:S150G:N204S:H236R	M77L:N134Y:S146G:N197S:H228R	amacGFP	39.29	1	6820.49
T11A:L71M	T8A:L68M	amacGFP	140.46	1	4859.14
K165M	K161M	amacGFP	519.15	5	8870.97
I126V:N204K:Q210L	I122V:N197K:Q203L	amacGFP	107.44	1	8607.1
K110M:R217L	K106M:R210L	amacGFP	60.13	1	10143
E19V:K28E:Y185H:F230S	E16V:K25E:Y181H:F222S	amacGFP	44.18	1	7263.84
N83Y:S88T:K108R:D120V	N80Y:S85T:K104R:D116V	amacGFP	147.32	1	5728.09
V14L:N188Y	V11L:N184Y	amacGFP	1245.86	10	468.365
M80V:I203T	M77V:I196T	amacGFP	26.36	1	8401.35
K2*:V14L:L55P	K2*:V11L:L52P	amacGFP	42.91	1	449
V14L:Y41S	V11L:Y38S	amacGFP	182.69	1	8952.18
V14L:M131K:N138Y	V11L:M127K:N134Y	amacGFP	35.82	1	7640.17
N83T	N80T	amacGFP	166.41	2	6777.49
V14L:N218Y	V11L:N211Y	amacGFP	150.86	1	9233.6
V14L:F133I	V11L:F129I	amacGFP	861.51	4	8234.71
V14L:F227Y	V11L:F219Y	amacGFP	443.94	4	496.212
F73L:E78V:F168Y:T221I	F70L:E75V:F164Y:T213I	amacGFP	49.14	1	2412.67
V14L:E45G:T64S:V123M:I126V:E242K	V11L:E42G:T61S:V119M:I122V:E234K	amacGFP	77.75	1	8520.34
S30G:L164P:K165R:E175V:H238N	S27G:L160P:K161R:E171V:H230N	amacGFP	53.51	1	554.388
K2N:T11A:V14L:E118V:N147S:H151D:N188D:I213V	K2N:T8A:V11L:E114V:N143S:H147D:N184D:I206V	amacGFP	117.53	1	462.321
V196A	V192A	amacGFP	1455.11	10	9138.92
H25R:E45G	H22R:E42G	amacGFP	30.87	1	9660.63
R99L	R95L	amacGFP	439.72	2	504.033
G163C:I198T	G159C:I194T	amacGFP	88.2	1	6281.23
Y244H	Y236H	amacGFP	962.4	7	9516.74
A39G	A36G	amacGFP	195.07	2	8687.19
K2*:K108M:N161I:N162T:G163A:L164*:K165R:V166*:N167T:F168S:K169R:I170S:R171A:H172T:N173T:I174L:E175R:G176A:G177A:V179S:Q180S:L181S:A182P:D183T:H184T:Y185T:Q186R:T187R:N188T:V189F:L191W:G192A:D193T:G194A:V196C:L197*:I198S:I203S:N204T:H205T:Y206T:L207*:S208A:C209V:Q210R:T211Q:A212P:I213S:S214A:D216T:R217V:N218T:E219R:T221L:R222A:D223I:H224T:M225W:V226S:L228W:E229S:F230S:F231L:S232V:A233P:C234V:H236I…	K2*:K104M:N157I:N158T:G159A:L160*:K161R:V162*:N163T:F164S:K165R:I166S:R167A:H168T:N169T:I170L:E171R:G172A:G173A:V175S:Q176S:L177S:A178P:D179T:H180T:Y181T:Q182R:T183R:N184T:V185F:L187W:G188A:D189T:G190A:V192C:L193*:I194S:I196S:N197T:H198T:Y199T:L200*:S201A:C202V:Q203R:T204Q:A205P:I206S:S207A:D209T:R210V:N211T:E212R:T213L:R214A:D215I:H216T:M217W:V218S:L220W:E221S:F222S:F223L:S224V:A225P:C226V:H228I…	amacGFP	79.82	1	514.81
V14L:F73L:H238N	V11L:F70L:H230N	amacGFP	201.75	2	7064.29
I13N:N149Y:L181H	I10N:N145Y:L177H	amacGFP	90.51	1	3794.57
E7G:E98V:K110R:K143M:V189A:F231I	E4G:E94V:K106R:K139M:V185A:F223I	amacGFP	27.53	1	5917.94
L228Q	L220Q	amacGFP	807.51	9	8556.64
V14L:Y185H:*246G	V11L:Y181H:*238G	amacGFP	105.58	1	10769.1
V14L:L17M:T51S	V11L:L14M:T48S	amacGFP	65.13	1	8805.39
V14L:K81R:N218Y	V11L:K78R:N211Y	amacGFP	32.79	1	7727.58
V14L:I96L	V11L:I92L	amacGFP	158.29	3	7745.7
V16I:P77H:E78D	V13I:P74H:E75D	amacGFP	97.55	1	6911.46
E8*:V14L:L197P	E5*:V11L:L193P	amacGFP	408.71	1	450.464
K2R:V14L:K169E	K2R:V11L:K165E	amacGFP	41.93	1	8391.12
T64S:R171L	T61S:R167L	amacGFP	82.48	1	3294.99
K2*:D38E:Y95N:N149S:R222L	K2*:D35E:Y91N:N145S:R214L	amacGFP	146.87	1	502.967
P195H:H238N	P191H:H230N	amacGFP	38.1	1	8993.87
V14L:S30C:Q104L:Y109F:N161S	V11L:S27C:Q100L:Y105F:N157S	amacGFP	43.93	1	6543.69
S67P:H184Y	S64P:H180Y	amacGFP	41.97	1	459.635
V14L:M240I	V11L:M232I	amacGFP	2123.95	12	9213.13
P56H:M80I:F231L	P53H:M77I:F223L	amacGFP	35.35	1	5982.44
V226A	V218A	amacGFP	1221.25	6	8335.29
D183A:S208R	D179A:S201R	amacGFP	27.59	1	9870.88
V14L:C209W	V11L:C202W	amacGFP	129.27	2	502.594
E8*:V14L:G141A	E5*:V11L:G137A	amacGFP	51.69	1	449
V14L:I155V:V189I	V11L:I151V:V185I	amacGFP	55.5	1	8126.17
L17Q:M82K:E98Q	L14Q:M79K:E94Q	amacGFP	70.47	1	10016.8
V14L:I46F	V11L:I43F	amacGFP	2026.41	7	6945.97
V14L:H236N:H238N	V11L:H228N:H230N	amacGFP	30.35	1	9454.03
V14L:N83H	V11L:N80H	amacGFP	296.16	3	8706.05
V14L:Y41C:F133L	V11L:Y38C:F129L	amacGFP	36.06	1	6811.81
E78K:N152S	E75K:N148S	amacGFP	34.86	1	9896.41
F168L	F164L	amacGFP	2471.16	10	2604.67
E8K:V14L:A89T	E5K:V11L:A86T	amacGFP	138.3	1	10534.4
I139N	I135N	amacGFP	141.11	3	3159.65
T11A:F148Y:V189A	T8A:F144Y:V185A	amacGFP	28.23	1	7485.45
K2*:V14L:Y76H:F231L	K2*:V11L:Y73H:F223L	amacGFP	44.75	1	460.192
V14L:V179E	V11L:V175E	amacGFP	625.2	7	8664.55
E34V	E31V	amacGFP	2303.61	11	7135.45
E36K:G137C:K245T	E33K:G133C:K237T	amacGFP	30.59	1	6439.15
V166A:L191W:F230I	V162A:L187W:F222I	amacGFP	54.71	1	6885.87
N124D:H238N	N120D:H230N	amacGFP	77.58	1	614.127
N124S	N120S	amacGFP	1478.95	7	5379.96
G119S	G115S	amacGFP	1302.09	7	9073.51
V14L:A182S	V11L:A178S	amacGFP	924.46	3	7359.1
K143E:T187M:M225I	K139E:T183M:M217I	amacGFP	35.46	1	639.7
E8V:T52N	E5V:T49N	amacGFP	101.48	1	8046.52
I13F:V14L:D120G:S208R	I10F:V11L:D116G:S201R	amacGFP	80.14	1	8157.25
K116R:F231L:K245R	K112R:F223L:K237R	amacGFP	28.85	1	6902.91
V14L:F231L	V11L:F223L	amacGFP	2740.89	16	7207.14
V14L:E19V:Y68H	V11L:E16V:Y65H	amacGFP	253.11	2	451.922
Y41C:T64A:R99H:I213F:H238R:D241N	Y38C:T61A:R95H:I206F:H230R:D233N	amacGFP	36.33	1	449
L17M	L14M	amacGFP	814.47	4	9357.45
V14L:N204T	V11L:N197T	amacGFP	78.77	1	8809.04
V14L:L197P	V11L:L193P	amacGFP	1180.95	11	5818.76
V14S:D193G:S232C	V11S:D189G:S224C	amacGFP	183.26	1	8041.67
F102S:K215I	F98S:K208I	amacGFP	44.19	1	7735.49
T65S:Q104R:T237S	T62S:Q100R:T229S	amacGFP	88.54	1	9291.99
V14L:T64S:S150N:S214N:C234R	V11L:T61S:S146N:S207N:C226R	amacGFP	42.02	1	6250.4
V14L:D21A:N83S	V11L:D18A:N80S	amacGFP	27.32	1	8471.1
Y109F	Y105F	amacGFP	2581.58	15	8965.26
R32C:Y41F:I198T	R29C:Y38F:I194T	amacGFP	66.47	1	7910.97
E34G:V196E	E31G:V192E	amacGFP	69.29	1	5454.16
E93V:Y154N:E175A:K215I:T237A	E89V:Y150N:E171A:K208I:T229A	amacGFP	43.11	1	8946.25
C72S:L122M	C69S:L118M	amacGFP	272.05	1	6514.82
D38N:T100I	D35N:T96I	amacGFP	103.59	1	7925.89
N162Y:E175Q	N158Y:E171Q	amacGFP	136.41	1	9245.24
R112H	R108H	amacGFP	1030.16	4	8606.32
F148I:N162K:E175M:N218S	F144I:N158K:E171M:N211S	amacGFP	63.72	1	449
L44Q	L41Q	amacGFP	1661.35	10	4196.36
V14L:D132E	V11L:D128E	amacGFP	275.38	2	8666.09
V24I:A74G	V21I:A71G	amacGFP	36.02	1	5762.57
I13V	I10V	amacGFP	946.97	6	9177.93
V14L:E45V:V153I	V11L:E42V:V149I	amacGFP	30.91	1	7231
L191S	L187S	amacGFP	1607.54	7	8484.48
V14L:T237N	V11L:T229N	amacGFP	252.68	2	8567.62
P92S	P88S	amacGFP	1139.77	2	6348.04
V14L:P190S	V11L:P186S	amacGFP	543.57	4	8022.8
V14L:S150R	V11L:S146R	amacGFP	674.54	5	8719.84
E78D:F133L:L191M	E75D:F129L:L187M	amacGFP	59.36	1	9110.66
V14L:T64S:E78A	V11L:T61S:E75A	amacGFP	83.56	1	8477.81
V14L:H151N:D183Y:G194A:Y206H	V11L:H147N:D179Y:G190A:Y199H	amacGFP	100.36	1	2582.36
M131L	M127L	amacGFP	2166.41	10	8988.26
V115A:K165N:D216E:H236Y	V111A:K161N:D209E:H228Y	amacGFP	27.02	1	1226.9
H79R	H76R	amacGFP	946.91	4	9515.07
Y154F	Y150F	amacGFP	895.25	5	10003.2
I126V	I122V	amacGFP	1495.58	9	10702
V14L:H238D	V11L:H230D	amacGFP	461.77	1	9312.85
G178V:T187M:I198V	G174V:T183M:I194V	amacGFP	27.59	1	6129.65
V14L:Y154F:Q210L:D223E:E242K	V11L:Y150F:Q203L:D215E:E234K	amacGFP	26.88	1	6118.41
V16I:H236L	V13I:H228L	amacGFP	90.9	1	9467.99
K2*:I70F:Q97L:F103Y:H236Q	K2*:I67F:Q93L:F99Y:H228Q	amacGFP	51.9	1	514.635
P92L	P88L	amacGFP	728.94	2	6417.26
G6C:V14L	G3C:V11L	amacGFP	2021.06	7	8560.81
Y68N:R112H:E127V:M156V:H238R	Y65N:R108H:E123V:M152V:H230R	amacGFP	143.39	1	527.798
G12R:Y76C	G9R:Y73C	amacGFP	35.43	1	713.267
C72S:S208R:G239D	C69S:S201R:G231D	amacGFP	36.36	1	9153.25
K108E:N152Y	K104E:N148Y	amacGFP	74.97	1	8127.03
V14L:E98K	V11L:E94K	amacGFP	339.39	1	8363.59
D38Y:L243R	D35Y:L235R	amacGFP	90.16	1	9125.65
G177V:*246R	G173V:*238R	amacGFP	55.31	1	8475.71
V14L:R217S	V11L:R210S	amacGFP	783.29	5	8896.95
C72S:K110R:M131I	C69S:K106R:M127I	amacGFP	40.36	1	8516.39
V14L:G119D:N152K	V11L:G115D:N148K	amacGFP	71.85	1	11635.4
P195H	P191H	amacGFP	722.07	5	9155.66
S150C:D216Y	S146C:D209Y	amacGFP	68.73	1	7225.51
E36D:F133I:H238I	E33D:F129I:H230I	amacGFP	27.61	1	8493.57
V14L:N138S:T221N	V11L:N134S:T213N	amacGFP	44.02	1	7157.68
F48I	F45I	amacGFP	914.36	5	12317.7
Q104K:R125H:Y154D:S208N:E219D	Q100K:R121H:Y150D:S201N:E212D	amacGFP	74.64	1	5372.37
E8*:C50Y:T61A:P92T:F103S:E145V:Q180R	E5*:C47Y:T58A:P88T:F99S:E141V:Q176R	amacGFP	106.99	1	460.95
S30C:M80V:I198V:E229V	S27C:M77V:I194V:E221V	amacGFP	34.76	1	485.36
E34V:P58S:H151N:M240T	E31V:P55S:H147N:M232T	amacGFP	31.93	1	452.073
E34K:H151Q:V166A:H238L	E31K:H147Q:V162A:H230L	amacGFP	41.97	1	2613.51
Q104L:G177C	Q100L:G173C	amacGFP	82.63	1	6810.41
V14L:S30R:Y185H	V11L:S27R:Y181H	amacGFP	50.08	1	8425.2
D120A:F230L:C234R:H238N	D116A:F222L:C226R:H230N	amacGFP	28.9	1	8079.22
I13T:E36K	I10T:E33K	amacGFP	56.94	1	7889.04
V14L:K143R:S232T	V11L:K139R:S224T	amacGFP	65.71	1	10064.6
K215E	K208E	amacGFP	299.3	1	9524.88
E114V:L144M:F168V:H236R	E110V:L140M:F164V:H228R	amacGFP	32.08	1	1474.66
V14L:H27L:V166A:L191F	V11L:H24L:V162A:L187F	amacGFP	178.3	1	9054.08
T100S:K110M:V123L	T96S:K106M:V119L	amacGFP	32.35	1	9074.51
K116R:G141W	K112R:G137W	amacGFP	99.93	1	8069.51
K110R	K106R	amacGFP	1156.72	11	9254.06
F10I	F7I	amacGFP	1349.49	6	7412.04
V14L:G119C	V11L:G115C	amacGFP	1815.88	3	8474.05
V14L:F102S:M225L	V11L:F98S:M217L	amacGFP	53.47	1	1809.48
D40N:N162I:L243P	D37N:N158I:L235P	amacGFP	88.52	1	8793.46
V16I:M131T:N173I	V13I:M127T:N169I	amacGFP	88.63	1	6088.87
D23A	D20A	amacGFP	722.85	3	8457.38
I203V	I196V	amacGFP	1276.96	8	9673.23
V14L:V166A:V179G	V11L:V162A:V175G	amacGFP	27.66	1	5895.5
V14L:K110M	V11L:K106M	amacGFP	1301.05	9	8617.98
V14L:P56S:M156T:Y206C	V11L:P53S:M152T:Y199C	amacGFP	35.61	1	5804.03
V14L:D21Y	V11L:D18Y	amacGFP	1842.1	3	8704.29
L181H:D223E:H238Q	L177H:D215E:H230Q	amacGFP	26.1	1	9899.75
T64S:K134N:S150C:D158N	T61S:K130N:S146C:D154N	amacGFP	85.89	1	7208.61
V14L:K116R:Y185C:L197Q:F231L	V11L:K112R:Y181C:L193Q:F223L	amacGFP	29.01	1	7220.29
E78D:F227I	E75D:F219I	amacGFP	267.5	1	12059.6
V14L:E34Q	V11L:E31Q	amacGFP	192.63	2	8021.65
V16D:Y41*:E78D:F103S:K116*:E127V:M156T:H184Y	V13D:Y38*:E75D:F99S:K112*:E123V:M152T:H180Y	amacGFP	54.38	1	616.583
V14L:Y68H:N149S:D241G	V11L:Y65H:N145S:D233G	amacGFP	66.17	1	636.997
I174V:C209Y:E229V	I170V:C202Y:E221V	amacGFP	26.7	1	471.928
V14L:I49F:N124K:M131K:M156T	V11L:I46F:N120K:M127K:M152T	amacGFP	26.95	1	1048.33
V14L:T100S	V11L:T96S	amacGFP	1239.08	5	9159.47
S232C	S224C	amacGFP	1833.85	9	9495.99
V14L:M80L	V11L:M77L	amacGFP	737.15	4	9195.1
V14L:H79L:V123L:H238N	V11L:H76L:V119L:H230N	amacGFP	50	1	5988.63
K54M:N218K	K51M:N211K	amacGFP	59.06	1	9573.6
D23V	D20V	amacGFP	1312.46	6	9153.11
F10L	F7L	amacGFP	2458.01	15	8589
V14L:E242G	V11L:E234G	amacGFP	834.84	8	8968.75
M156L:K159N	M152L:K155N	amacGFP	230.54	1	9077.54
E78K	E75K	amacGFP	1103.3	5	9224.14
S232R	S224R	amacGFP	1337.41	9	10657.2
G113A:G178W	G109A:G174W	amacGFP	143.29	1	9167.31
T100S	T96S	amacGFP	1304.21	8	9119.22
V14L:N83D	V11L:N80D	amacGFP	1319.76	11	8962.05
E8*:L20R:S30G:V57E:I70T:E93G	E5*:L17R:S27G:V54E:I67T:E89G	amacGFP	26.5	1	640.81
V14L:E114D	V11L:E110D	amacGFP	1522.31	7	7743.4
C209Y:N218S:C234S	C202Y:N211S:C226S	amacGFP	67.82	1	2599.4
Y185N:V189A:D241G	Y181N:V185A:D233G	amacGFP	81.66	1	10045.9
V14L:G141R	V11L:G137R	amacGFP	1260.75	7	8776.62
F10L:N149Y:N204Y	F7L:N145Y:N197Y	amacGFP	38.53	1	2728.07
N167D:H238N	N163D:H230N	amacGFP	197.87	2	8446.83
G163C:E175G:G235V:Y244S	G159C:E171G:G227V:Y236S	amacGFP	98.56	1	7325.68
V14L:S150I:S208R:G235V	V11L:S146I:S201R:G227V	amacGFP	110.6	1	7054.92
V14L:F102S:N152Y:N162I	V11L:F98S:N148Y:N158I	amacGFP	26.66	1	7631.25
S1G:V14L:I203N	S1G:V11L:I196N	amacGFP	50.76	1	8172.29
S208N	S201N	amacGFP	704.5	4	8572.76
T64S	T61S	amacGFP	1254.02	10	9243.12
V14L:Y109F:E219D	V11L:Y105F:E212D	amacGFP	39.15	1	6219.61
V14L:D158N	V11L:D154N	amacGFP	649.87	2	8978.47
C50S:K165R:T221A	C47S:K161R:T213A	amacGFP	34.12	1	9152.64
V14L:R32H	V11L:R29H	amacGFP	532.78	5	8518.38
K2*:V14L:I18N:V123M:M131L:M225L:F227I:Y244N	K2*:V11L:I15N:V119M:M127L:M217L:F219I:Y236N	amacGFP	35.87	1	458.146
E19V:N152D:K159M	E16V:N148D:K155M	amacGFP	97.87	1	7355.67
T11I:D136G:I198N	T8I:D132G:I194N	amacGFP	127.79	1	8228.09
V14L:N83I:G239C	V11L:N80I:G231C	amacGFP	48.2	1	4832.52
L44Q:K54M	L41Q:K51M	amacGFP	65.24	1	4010.48
H25L:L181H	H22L:L177H	amacGFP	83.97	1	9906.55
K2M:E93G	K2M:E89G	amacGFP	31.17	1	8534.58
V14L:E19G	V11L:E16G	amacGFP	805.96	6	6496.39
Y68H:E93G:T121S:M156I:N188S	Y65H:E89G:T117S:M152I:N184S	amacGFP	49.65	1	585.114
R99C:L197P	R95C:L193P	amacGFP	45.25	1	526.232
S150C:N152I	S146C:N148I	amacGFP	120.22	3	11700.7
V14L:E19V:T100A:L191M:F231S	V11L:E16V:T96A:L187M:F223S	amacGFP	42.67	1	2857.8
V14L:V63A	V11L:V60A	amacGFP	2104.54	9	3234.01
V14L:I203F	V11L:I196F	amacGFP	525.16	3	8831.37
I13V:N167Y:Y185H	I10V:N163Y:Y181H	amacGFP	98.82	1	9591.83
N83S:L191M	N80S:L187M	amacGFP	87.43	1	8790.71
T11A:V14L:K81N	T8A:V11L:K78N	amacGFP	72.94	1	7265.21
V16I:K116E:D120G	V13I:K112E:D116G	amacGFP	93.33	1	7758.94
V14L:D21G:M82K	V11L:D18G:M79K	amacGFP	86.99	1	7395.66
D120N:S214C	D116N:S207C	amacGFP	131.82	1	8654.1
V14L:A39P:R99C:T121A:H238N	V11L:A36P:R95C:T117A:H230N	amacGFP	64.66	1	667.767
H27R:M90L:Q104R:G176D	H24R:M87L:Q100R:G172D	amacGFP	144.33	1	12415.3
I155V:Q210R	I151V:Q203R	amacGFP	65.98	1	9749.94
V14L:E127G	V11L:E123G	amacGFP	1293.51	6	8981.49
V14L:I96T:T211I:V226I:H238Q	V11L:I92T:T204I:V218I:H230Q	amacGFP	35.46	1	695.487
E19K	E16K	amacGFP	699.89	5	9414.19
V14L:F231S	V11L:F223S	amacGFP	1154.23	4	1479.95
V14L:Y109F:G137S:E145D:N167Y:Q210R	V11L:Y105F:G133S:E141D:N163Y:Q203R	amacGFP	94.42	1	2354.81
N83Y:G194A	N80Y:G190A	amacGFP	109.28	1	9655.2
G119D	G115D	amacGFP	523.24	5	9281.45
V14L:T64A:Y185F	V11L:T61A:Y181F	amacGFP	48.96	1	2156.58
Y68N:Y109C:S150N	Y65N:Y105C:S146N	amacGFP	68.81	1	456.286
L20M:Y146F	L17M:Y142F	amacGFP	70.82	1	9274.68
D84A	D81A	amacGFP	125.35	2	1177.7
N149Y	N145Y	amacGFP	859.85	2	3416.72
H79Y:F168S:I198T	H76Y:F164S:I194T	amacGFP	109.88	1	449
G42S:A212S:A233V	G39S:A205S:A225V	amacGFP	87.88	1	9571.94
A233P	A225P	amacGFP	85.02	1	3014.88
I126V:F231L	I122V:F223L	amacGFP	36.53	1	8814.99
K159T:F168L:H184Y:R222C:M225I	K155T:F164L:H180Y:R214C:M217I	amacGFP	55.78	1	684.731
H79L:Q104R	H76L:Q100R	amacGFP	36.49	1	10203.8
I18V:Y206N	I15V:Y199N	amacGFP	35.18	1	9729.98
V14L:Y185N:G194D	V11L:Y181N:G190D	amacGFP	31.2	1	9132.11
V14L:E118G	V11L:E114G	amacGFP	1511.6	8	7519.46
N218Y	N211Y	amacGFP	1588.08	4	9364.26
V14L:D38G:K108M	V11L:D35G:K104M	amacGFP	40.3	1	5755.94
V14L:M80I	V11L:M77I	amacGFP	1155.47	8	8288.59
K2*:V14L:E135G:N149S:P190T:F231L	K2*:V11L:E131G:N145S:P186T:F223L	amacGFP	59.48	1	517.72
K129N:G130V	K125N:G126V	amacGFP	88.96	1	6293.86
V14L:D21E:K108M:N162K	V11L:D18E:K104M:N158K	amacGFP	41.88	1	9889.85
I139V:Y244N	I135V:Y236N	amacGFP	32.85	1	10027.1
K108M:C234F	K104M:C226F	amacGFP	44.81	1	7889.2
V14L:E93D	V11L:E89D	amacGFP	1384.9	7	9497.58
K129N:I203F:G239A	K125N:I196F:G231A	amacGFP	55.52	1	9103.85
G176S:Y185F	G172S:Y181F	amacGFP	63.82	1	9842.62
L243Q	L235Q	amacGFP	1326.5	7	9904.86
N83I:A160D:P195T	N80I:A156D:P191T	amacGFP	61.8	1	3491.66
V14L:K28M:M131T:H184N:S208N:H238N	V11L:K25M:M127T:H180N:S201N:H230N	amacGFP	46.15	1	5607.92
V14L:E45G:N83S:E242G	V11L:E42G:N80S:E234G	amacGFP	118	1	8761.33
G6R	G3R	amacGFP	52.25	1	8642.62
T51S:I170T:R171L:N204V:V226I	T48S:I166T:R167L:N197V:V218I	amacGFP	26.06	1	11709.7
K43R:H238N	K40R:H230N	amacGFP	106.95	1	9086.3
T64N:K110M:M131V:D193G	T61N:K106M:M127V:D189G	amacGFP	56.93	1	507.086
L62F	L59F	amacGFP	170.01	3	2800.71
K2R:V14L:M240K	K2R:V11L:M232K	amacGFP	30.54	1	8666.06
V14L:N147D:N218I	V11L:N143D:N211I	amacGFP	90.82	1	7970.2
H79R:F168I	H76R:F164I	amacGFP	34.83	1	4535.95
K54Q:K159M:H238N	K51Q:K155M:H230N	amacGFP	75.05	1	10063.1
S30I:K215I	S27I:K208I	amacGFP	123.55	1	8344.61
V14L:L140M:N152Y:M156L:R171H:V189A:N204D	V11L:L136M:N148Y:M152L:R167H:V185A:N197D	amacGFP	89.82	1	5461.59
K165E:P195T:H238N	K161E:P191T:H230N	amacGFP	33.38	1	9418.73
V14L:F102L:N167D	V11L:F98L:N163D	amacGFP	45.3	1	8636.81
G26D:F117I:K129E	G23D:F113I:K125E	amacGFP	29.44	1	6509.48
E118K	E114K	amacGFP	1637.37	7	9066.98
V14L:Q97H:D132G:F227L	V11L:Q93H:D128G:F219L	amacGFP	117.25	1	449
E145V:G192C	E141V:G188C	amacGFP	35.11	1	8071.55
V14L:G137C	V11L:G133C	amacGFP	436.91	2	7025.46
L55P:V189A	L52P:V185A	amacGFP	70.58	1	10716.3
V14L:K159M	V11L:K155M	amacGFP	916.48	9	8976.97
S1N:V14L:I18V:K108M	S1N:V11L:I15V:K104M	amacGFP	72.37	1	8995.56
G12W:V14L	G9W:V11L	amacGFP	193.49	5	7307.75
V14L:I18V:P60T	V11L:I15V:P57T	amacGFP	136	1	8201.56
L9Q:V14L:S30G:D105Y:M131T	L6Q:V11L:S27G:D101Y:M127T	amacGFP	32.26	1	6088.11
S30G:K54E:Y154H	S27G:K51E:Y150H	amacGFP	43.87	1	8322.67
K2R:G6A:E7R:E8S:L9C:F10S:T11P:I13S:V14F:V16S:L17*:I18L:E19S:L20W:D21T:G22A:D23T:V24Y:H25T:G26A:H27T:K28S:F29S:S30A:V31C:R32A:G33A:E34R:G35A:E36R:G37A:D38M:A39P:D40T:Y41T:G42A:K43S:L44W:E45R:I46S:K47S:F48S:I49S:C50A:T51P:T52P:G53A:K54S:L55C:V57C:W59G:T61P:L62S:V63*:T64P:T65P:L66C:S67R:Y68T:G69A:I70F:L71C:C72A:F73S:A74R:R75A:Y76T:E78N:H79T:M80*:K81R:M82*:N83T:D84T:F85S:F86S:K87S:S88P:A89P:M90C:E93K…	K2R:G3A:E4R:E5S:L6C:F7S:T8P:I10S:V11F:V13S:L14*:I15L:E16S:L17W:D18T:G19A:D20T:V21Y:H22T:G23A:H24T:K25S:F26S:S27A:V28C:R29A:G30A:E31R:G32A:E33R:G34A:D35M:A36P:D37T:Y38T:G39A:K40S:L41W:E42R:I43S:K44S:F45S:I46S:C47A:T48P:T49P:G50A:K51S:L52C:V54C:W56G:T58P:L59S:V60*:T61P:T62P:L63C:S64R:Y65T:G66A:I67F:L68C:C69A:F70S:A71R:R72A:Y73T:E75N:H76T:M77*:K78R:M79*:N80T:D81T:F82S:F83S:K84S:S85P:A86P:M87C:E89K:G…	amacGFP	64.51	1	626.948
V14L:Y41H:H238N	V11L:Y38H:H230N	amacGFP	76.59	1	9404.26
I46V:H79R:Q97H	I43V:H76R:Q93H	amacGFP	50.51	1	497.102
V14L:T65S	V11L:T62S	amacGFP	1959.99	11	10639.8
E98D	E94D	amacGFP	813.62	4	8519.47
V14L:M131T:L191F	V11L:M127T:L187F	amacGFP	127.96	1	7972.98
T51S	T48S	amacGFP	881.54	6	8733.8
V14L:S67T	V11L:S64T	amacGFP	201.19	4	4127.43
V63M:Y109F:G239D	V60M:Y105F:G231D	amacGFP	36.98	1	609.585
N147S:M225L	N143S:M217L	amacGFP	47.38	1	6222.55
V31M:V189I:V196M:E229V	V28M:V185I:V192M:E221V	amacGFP	42.48	1	463.066
V14L:E242K	V11L:E234K	amacGFP	610.84	2	9492.38
V14S	V11S	amacGFP	1641.39	9	8496.77
G53D:T61S:E135V	G50D:T58S:E131V	amacGFP	47.09	1	7242.31
V14L:A39S:A74V	V11L:A36S:A71V	amacGFP	67.45	1	3704.93
D21N:L55M	D18N:L52M	amacGFP	109.05	1	8835.3
G35C:D158G:F227L	G32C:D154G:F219L	amacGFP	62.62	1	1063.26
V14L:K81M	V11L:K78M	amacGFP	1680.93	12	8337.5
Q104R:H238N	Q100R:H230N	amacGFP	233.14	1	10909.2
L9Q:V14L:D120V:S150C:L197R	L6Q:V11L:D116V:S146C:L193R	amacGFP	40.47	1	4968.61
V14L:G141R:F230I:C234Y:M240T	V11L:G137R:F222I:C226Y:M232T	amacGFP	119.24	1	6236.73
Y95F:V153A:H205Y:T211A	Y91F:V149A:H198Y:T204A	amacGFP	94.16	1	482.058
V14L:E219V	V11L:E212V	amacGFP	328.47	2	7094.06
K143E	K139E	amacGFP	863.85	4	8944.64
V123A:D158N:N173D:E175G:H184C:H238N	V119A:D154N:N169D:E171G:H180C:H230N	amacGFP	28.85	1	449
S1N:E93G:N167D	S1N:E89G:N163D	amacGFP	177.56	1	8348.43
T65S	T62S	amacGFP	3182.25	16	11111.2
I13S:V14R:V16S:L17*:I18L:E19S:L20W:D21T:G22A:D23T:V24Y:H25T:G26A:H27T:K28S:F29S:S30A:V31C:R32A:G33A:E34R:G35A:E36R:G37A:D38M:A39P:D40T:Y41T:G42A:K43S:L44W:E45R:I46S:K47S:F48S:I49S:C50A:T51P:T52P:G53A:K54S:L55C:V57C:W59G:T61P:L62S:V63*:T64P:T65P:L66C:S67R:Y68T:G69A:I70F:L71C:C72A:F73S:A74R:R75A:Y76T:E78K:H79T:M80*:K81R:M82*:N83T:D84T:F85S:F86S:K87S:S88P:A89P:M90C:E93K:G94A:Y95I:I96S:Q97R:E98S:R99A…	I10S:V11R:V13S:L14*:I15L:E16S:L17W:D18T:G19A:D20T:V21Y:H22T:G23A:H24T:K25S:F26S:S27A:V28C:R29A:G30A:E31R:G32A:E33R:G34A:D35M:A36P:D37T:Y38T:G39A:K40S:L41W:E42R:I43S:K44S:F45S:I46S:C47A:T48P:T49P:G50A:K51S:L52C:V54C:W56G:T58P:L59S:V60*:T61P:T62P:L63C:S64R:Y65T:G66A:I67F:L68C:C69A:F70S:A71R:R72A:Y73T:E75K:H76T:M77*:K78R:M79*:N80T:D81T:F82S:F83S:K84S:S85P:A86P:M87C:E89K:G90A:Y91I:I92S:Q93R:E94S:R95A…	amacGFP	34.86	1	633.463
V14L:M80L:F168I	V11L:M77L:F164I	amacGFP	31.35	1	5610.67
E114V:G194C:T211S	E110V:G190C:T204S	amacGFP	41.43	1	14653.4
Y41S:K47E:H142N	Y38S:K44E:H138N	amacGFP	29.53	1	6579.82
N173S:G235E	N169S:G227E	amacGFP	110.85	1	6958.09
E135V:D241G	E131V:D233G	amacGFP	88.93	1	8888.41
V14L:N204Y	V11L:N197Y	amacGFP	1594.53	6	8708.68
F102L:Y154N:A160V	F98L:Y150N:A156V	amacGFP	43.26	1	9588.86
F102L	F98L	amacGFP	2225.56	9	9512.73
V14L:H27L	V11L:H24L	amacGFP	1635.57	10	8787.38
F102Y	F98Y	amacGFP	1045.69	7	9162.39
G239D	G231D	amacGFP	1002.92	5	9476.3
V14L:L181P:P195L	V11L:L177P:P191L	amacGFP	26.13	1	8105.28
V57M	V54M	amacGFP	651.62	3	4878.58
V14L:I203T	V11L:I196T	amacGFP	808.34	7	9091.42
V14L:F148L	V11L:F144L	amacGFP	539.79	8	590.401
V14L:N83D:E93D:M131L	V11L:N80D:E89D:M127L	amacGFP	52.23	1	8364.11
I13V:Q104H:Y185N	I10V:Q100H:Y181N	amacGFP	50.21	1	9265.41
D158V:M240V	D154V:M232V	amacGFP	64.47	1	6421.06
E8*:C50R:K87E:D105G:G107C:Q180K:L191*:I213F	E5*:C47R:K84E:D101G:G103C:Q176K:L187*:I206F	amacGFP	104.48	1	449
V14L:Y146F:G178W	V11L:Y142F:G174W	amacGFP	114.49	1	8160.95
H25R:K169E	H22R:K165E	amacGFP	71.57	1	7696.21
I203T:V226I	I196T:V218I	amacGFP	49.62	1	10226.8
L181H	L177H	amacGFP	1729.58	11	10155.6
V14L:K28R:K110R:H236Y	V11L:K25R:K106R:H228Y	amacGFP	120.02	1	7605.01
I13V:V14L:N167S:F168S:Q210L	I10V:V11L:N163S:F164S:Q203L	amacGFP	56.12	1	449
K2R:Y95F:K169M	K2R:Y91F:K165M	amacGFP	53.35	1	4220.63
V14L:K169E	V11L:K165E	amacGFP	1604.32	5	8079.38
D120G:P157S:N161Y:N167S	D116G:P153S:N157Y:N163S	amacGFP	80.89	1	5818.91
V63A:T65S	V60A:T62S	amacGFP	76.35	1	2119.56
G12R:I155V:F168Y:F230Y:H238N	G9R:I151V:F164Y:F222Y:H230N	amacGFP	38.16	1	1774.74
V14L:K134N	V11L:K130N	amacGFP	1537.78	6	9070.26
S30G:L197Q	S27G:L193Q	amacGFP	56.42	1	8326.18
V14L:H79P:F231Y:L243P	V11L:H76P:F223Y:L235P	amacGFP	32.16	1	823.346
V14L:S208R	V11L:S201R	amacGFP	984.81	6	10053.6
V16I:T111A	V13I:T107A	amacGFP	74.29	2	5551.73
D40Y:M156K:P195H	D37Y:M152K:P191H	amacGFP	40.98	1	7247.81
V14L:D40N:M156L:I203N	V11L:D37N:M152L:I196N	amacGFP	30.03	1	9192.44
Y154N:M240K	Y150N:M232K	amacGFP	33.76	1	7855.15
V14L:L17Q	V11L:L14Q	amacGFP	698.5	2	8620.82
L9M:V14L:K47R:E78D:M240V	L6M:V11L:K44R:E75D:M232V	amacGFP	62.72	1	7635.14
V14L:N147D:K169R	V11L:N143D:K165R	amacGFP	119.43	2	9219.5
E175G	E171G	amacGFP	1860.01	11	9751.73
V14L:Y146F	V11L:Y142F	amacGFP	1550.15	8	9077.99
E7K:D106H:R217C	E4K:D102H:R210C	amacGFP	27.14	1	873.11
N83H	N80H	amacGFP	32.8	1	7849.33
F231S	F223S	amacGFP	1672.02	10	1634.15
K165E:H172Q	K161E:H168Q	amacGFP	34.19	1	3386.04
S1C:V14L:N167I:D183N:M240L	S1C:V11L:N163I:D179N:M232L	amacGFP	52.77	1	7434.46
V14L:I174T:Q210H:M240L	V11L:I170T:Q203H:M232L	amacGFP	36.94	1	5205.08
K116Q:S150C	K112Q:S146C	amacGFP	50.94	1	8210.18
D158V:I170T:H172L:F231L	D154V:I166T:H168L:F223L	amacGFP	87.64	1	4502.45
T11I:D40G	T8I:D37G	amacGFP	81.9	1	8835.67
F148I	F144I	amacGFP	929.98	9	670.202
K134R	K130R	amacGFP	1257.65	9	9325.43
G137C:R222S	G133C:R214S	amacGFP	41.37	1	7521.19
T51S:T187S	T48S:T183S	amacGFP	135.41	1	8620.65
F48L:H238N	F45L:H230N	amacGFP	195.47	2	4859.83
Y109F:K116M:E135D:N162S:N204D	Y105F:K112M:E131D:N158S:N197D	amacGFP	33.55	1	8930.61
V14L:D38V:R217H	V11L:D35V:R210H	amacGFP	87.32	1	7852.3
S1G:V24I:A89S:I96T:F148I:S214G	S1G:V21I:A86S:I92T:F144I:S207G	amacGFP	40.42	1	470.015
V14L:N138I	V11L:N134I	amacGFP	1794.03	6	8427.68
V14L:N161D	V11L:N157D	amacGFP	925.27	7	7052.29
V14L:L71F:N162I	V11L:L68F:N158I	amacGFP	42.17	1	4673.64
Y146H	Y142H	amacGFP	1141.83	9	3821.79
H142R	H138R	amacGFP	1758.84	13	9449.42
E242G	E234G	amacGFP	1290.7	7	9944.55
T11I:V179A	T8I:V175A	amacGFP	47.25	1	6165.16
L197R:H238N	L193R:H230N	amacGFP	83.75	1	10819.8
G6C:V14L:V179M:A233V:H238N	G3C:V11L:V175M:A225V:H230N	amacGFP	71.42	1	8082.77
K2M:V14L	K2M:V11L	amacGFP	1004.99	5	8993.36
E8*:V14L:I155T	E5*:V11L:I151T	amacGFP	229.26	1	449
I155V	I151V	amacGFP	522.98	7	8656.51
V14L:K159T:R171L	V11L:K155T:R167L	amacGFP	63.76	1	6800.13
N138S:K165E:N218I	N134S:K161E:N211I	amacGFP	53.17	1	7787.21
S1G:V14L:T100A	S1G:V11L:T96A	amacGFP	34.61	1	9259.79
E7V:V14L:S30C	E4V:V11L:S27C	amacGFP	37.78	1	8083.28
V14L:N218S	V11L:N211S	amacGFP	1411.32	4	8760.3
N124Y:Y146H:F148L:N167Y:N204S	N120Y:Y142H:F144L:N163Y:N197S	amacGFP	33.04	1	456.535
I155T:V166M	I151T:V162M	amacGFP	36.21	1	1958.48
K81M	K78M	amacGFP	2489.22	14	8860.7
F133Y	F129Y	amacGFP	648.88	6	6802.62
V14L:D23E:M131V:M156L:M240T	V11L:D20E:M127V:M152L:M232T	amacGFP	123.1	1	9190.54
E8G:N167S:G178V	E5G:N163S:G174V	amacGFP	47.51	1	11324.2
G163C:I174T	G159C:I170T	amacGFP	140.44	1	7097.24
V14L:V179G	V11L:V175G	amacGFP	221.43	2	4629.85
I155T	I151T	amacGFP	751.47	7	2102.33
K143M:D193Y:L197Q	K139M:D189Y:L193Q	amacGFP	68.45	1	9359.32
V14L:V123M	V11L:V119M	amacGFP	570.55	6	7979.95
N188Y:H224R	N184Y:H216R	amacGFP	30.2	1	477.223
K2*:V14L:T51A:K81M:M131A:E219K:M225T	K2*:V11L:T48A:K78M:M127A:E212K:M217T	amacGFP	111.43	1	452.194
S1N:N138D:G178W	S1N:N134D:G174W	amacGFP	34.05	1	6811.91
H79L	H76L	amacGFP	1891.98	9	8830.77
F102L:E145K	F98L:E141K	amacGFP	45.85	1	8207.6
T187A	T183A	amacGFP	1181.16	9	9933.15
V14L:Q210R:F231L	V11L:Q203R:F223L	amacGFP	34.37	1	7385.91
D120V:Y154F:G192C	D116V:Y150F:G188C	amacGFP	82.75	1	9444.07
K47R:E145K	K44R:E141K	amacGFP	60.28	1	7181.28
V14L:I70V:K165E:S208G:Q210K	V11L:I67V:K161E:S201G:Q203K	amacGFP	37.16	1	5342.32
A89D:P157Q	A86D:P153Q	amacGFP	27.73	1	559.655
L71S:V189A	L68S:V185A	amacGFP	114.78	1	1735.01
V14L:N152S:M156R	V11L:N148S:M152R	amacGFP	94.65	1	8928.01
V189D:D193Y:S232C	V185D:D189Y:S224C	amacGFP	112.33	1	5593.48
V14L:L17Q:S30R	V11L:L14Q:S27R	amacGFP	78.46	2	8480.74
E36D:F86Y:Y206H	E33D:F83Y:Y199H	amacGFP	36.16	1	7886.81
R99C:F231S:H238N	R95C:F223S:H230N	amacGFP	64.11	1	576.009
V14L:D38E:K54R	V11L:D35E:K51R	amacGFP	66.95	1	8474.13
V14L:K134N:S232C	V11L:K130N:S224C	amacGFP	31.13	1	8446.13
K116E	K112E	amacGFP	2661.88	6	8067.77
E135D:I174M	E131D:I170M	amacGFP	45.11	1	10500.8
V14L:F73L	V11L:F70L	amacGFP	2286	9	7401.13
G26D:E78V	G23D:E75V	amacGFP	104.35	2	7869.15
V179M:P195L:N204Y:H238N	V175M:P191L:N197Y:H230N	amacGFP	32.34	1	7621.97
V14L:D136V	V11L:D132V	amacGFP	1529.47	4	8224.16
I203S	I196S	amacGFP	265.43	3	9860.09
V14L:M131K	V11L:M127K	amacGFP	661.98	4	8601.53
V14L:Y206C	V11L:Y199C	amacGFP	1099.1	6	8712.48
D21V:H25R:K54E:E93A	D18V:H22R:K51E:E89A	amacGFP	40.87	1	8205.86
E19V:I46F:K116R	E16V:I43F:K112R	amacGFP	74.46	1	6150.11
V14L:T51A:F168L	V11L:T48A:F164L	amacGFP	29.37	1	4127.89
L9Q:N167S	L6Q:N163S	amacGFP	61.13	1	9175.05
Q104L:E175K:F227L	Q100L:E171K:F219L	amacGFP	177.68	1	9765.5
V14L:D38E:K108M:M131L:K143M	V11L:D35E:K104M:M127L:K139M	amacGFP	60.26	1	9371.72
K159E:H238N	K155E:H230N	amacGFP	145.85	1	8781.96
E78G:K108Q:G177S	E75G:K104Q:G173S	amacGFP	102.91	1	8784.35
K110M:Y244F	K106M:Y236F	amacGFP	52.47	1	9454.13
V14L:T65S:E127A:V166A:I198F	V11L:T62S:E123A:V162A:I194F	amacGFP	39.14	1	10962.8
S30C:K134R:S150R:V226I	S27C:K130R:S146R:V218I	amacGFP	83.61	1	7392.8
K28E:K54R	K25E:K51R	amacGFP	37.09	1	8175.87
S30I:M131L	S27I:M127L	amacGFP	125.65	1	7715.75
I96N:T221I:K245E	I92N:T213I:K237E	amacGFP	42.35	1	6875.81
Y95F:E118V:G235W:Y244N	Y91F:E114V:G227W:Y236N	amacGFP	128.34	1	4044.74
G12R:V14L	G9R:V11L	amacGFP	2144.02	12	8880.81
A233V:H238N	A225V:H230N	amacGFP	41.21	1	7144.89
H25Q:I49N	H22Q:I46N	amacGFP	79.82	1	8441.74
V14L:E45G:H184N	V11L:E42G:H180N	amacGFP	69.96	1	4143.44
S1R:V196L	S1R:V192L	amacGFP	39.32	1	9148.37
K54E:H238N	K51E:H230N	amacGFP	155.88	2	9526.27
E7D:F73Y:D132E:Y154F:M156T:Q210R	E4D:F70Y:D128E:Y150F:M152T:Q203R	amacGFP	27.86	1	2001.48
V166L:K245R	V162L:K237R	amacGFP	31.17	1	6750.8
D105N	D101N	amacGFP	777.91	3	9311.52
V14L:I70F:D223V	V11L:I67F:D215V	amacGFP	36.31	1	644.085
E114V:L140R	E110V:L136R	amacGFP	60.68	1	8007.38
V14L:N204T:C234R	V11L:N197T:C226R	amacGFP	61.3	1	7512.95
Y41*:K54M:V63A:N149S	Y38*:K51M:V60A:N145S	amacGFP	29.21	1	471.311
V14A:F230S	V11A:F222S	amacGFP	39.82	1	7608.34
R222L	R214L	amacGFP	402.86	2	9436.71
F85S:K129E:P157Q	F82S:K125E:P153Q	amacGFP	30.17	1	537.022
I213T	I206T	amacGFP	2053.67	11	10697.4
Y68H:E114D	Y65H:E110D	amacGFP	77.42	1	480.609
V14L:K108E	V11L:K104E	amacGFP	1401.86	7	8385.15
T211A:H238N	T204A:H230N	amacGFP	94.77	2	1649.6
G22C:N152D:H238D	G19C:N148D:H230D	amacGFP	27.09	1	7639.56
D21V:V63A:H172L:D241Y	D18V:V60A:H168L:D233Y	amacGFP	32.89	1	1212.4
L9P:Y185S	L6P:Y181S	amacGFP	34.26	1	8947.6
M80T:N188D	M77T:N184D	amacGFP	47.11	1	640.218
Y41C:G176D:H236Y	Y38C:G172D:H228Y	amacGFP	38.98	1	8536.81
V14L:N152I:Y244N	V11L:N148I:Y236N	amacGFP	51.41	1	14168.4
G177C	G173C	amacGFP	1373.68	8	9235.94
D40E:K143T	D37E:K139T	amacGFP	186.26	1	8406.12
V14L:D132N	V11L:D128N	amacGFP	581.26	4	8641.21
V14L:F231I	V11L:F223I	amacGFP	678.65	3	6746.52
D38E	D35E	amacGFP	1237.55	6	9678.35
D223H	D215H	amacGFP	251.22	3	8271.67
V14L:E93A	V11L:E89A	amacGFP	302.37	1	8949.41
I213V:F230S	I206V:F222S	amacGFP	56.93	1	12448.4
K2*:V14L:E19G:T65S:I174T:F231S	K2*:V11L:E16G:T62S:I170T:F223S	amacGFP	51.58	1	453.6
T61S:K81M:G235E	T58S:K78M:G227E	amacGFP	52.42	1	7322.19
P190L	P186L	amacGFP	355.67	3	8249.66
F102I	F98I	amacGFP	1806.69	14	9940.11
V14L:M82I	V11L:M79I	amacGFP	842.95	6	8945.4
I46V:M240K	I43V:M232K	amacGFP	76.95	1	9289.71
K2R:E8V:V14L:Y41C:D136G:F168I	K2R:E5V:V11L:Y38C:D132G:F164I	amacGFP	146.23	1	3373.18
M131V:N147S	M127V:N143S	amacGFP	77.66	1	9034.9
E219G	E212G	amacGFP	615.66	6	4206.63
V14L:M90I	V11L:M87I	amacGFP	318.48	4	2832.78
D40N:N173I:V226L	D37N:N169I:V218L	amacGFP	34.83	1	4764.29
I126V:T211S	I122V:T204S	amacGFP	128.74	1	14147.6
Q104H:I170V:R217S:T237S	Q100H:I166V:R210S:T229S	amacGFP	35.84	1	14658.2
N188Y	N184Y	amacGFP	1677.46	9	501.107
V14L:N218I	V11L:N211I	amacGFP	858.44	8	8471.3
V14L:D21A:H79R:M156L:Q210R:H238S	V11L:D18A:H76R:M152L:Q203R:H230S	amacGFP	104.19	1	8499.74
P92H:R99S:P195S	P88H:R95S:P191S	amacGFP	71.35	1	490.584
G6D:V14L:E98V:D105Y:K169M:E175K:E229V	G3D:V11L:E94V:D101Y:K165M:E171K:E221V	amacGFP	33.14	1	479.536
I70V:N204D	I67V:N197D	amacGFP	76.79	2	8250.24
F227Y	F219Y	amacGFP	330.39	5	492.712
R32L	R29L	amacGFP	663.01	2	8829.62
H25L:V196M	H22L:V192M	amacGFP	119.71	1	8553.16
V14L:V153A:I174T	V11L:V149A:I170T	amacGFP	40.19	1	5790.91
N83H:D193V:D216G	N80H:D189V:D209G	amacGFP	46.44	1	7792.07
F73Y:P199H	F70Y:P195H	amacGFP	31.73	1	449
V14L:S232G:E242V:*246G	V11L:S224G:E234V:*238G	amacGFP	33.85	1	7935.46
T100S:Q210R	T96S:Q203R	amacGFP	63.38	1	10292.6
G12R:V14L:M90L	G9R:V11L:M87L	amacGFP	127.42	1	8256.69
V14L:N124S	V11L:N120S	amacGFP	1781.55	11	5120.29
E8K:E118K	E5K:E114K	amacGFP	49.56	1	7438.23
V14L:P15A	V11L:P12A	amacGFP	54.89	1	7039.45
I96N:H238N	I92N:H230N	amacGFP	159.21	2	7212.78
V14L:D38E:E98D:Y154C:M240T	V11L:D35E:E94D:Y150C:M232T	amacGFP	37.42	1	5541.7
V14L:D223E	V11L:D215E	amacGFP	434.67	3	8790.21
D120Y	D116Y	amacGFP	989.81	6	9307.11
V14L:H238R	V11L:H230R	amacGFP	1078.96	8	9473.84
M131I:D193Y:G239V	M127I:D189Y:G231V	amacGFP	102.22	1	8975.27
E7G:V14L:M82K:M131I:Y244H	E4G:V11L:M79K:M127I:Y236H	amacGFP	55.57	1	8506.98
V14L:K159N:R222S:G239V:Y244*	V11L:K155N:R214S:G231V:Y236*	amacGFP	36.74	1	8685.08
H27R:P60L	H24R:P57L	amacGFP	41.05	1	3623.89
M240L	M232L	amacGFP	1044.12	4	9557.36
G35S:D84N:T211A:E229G:S232C	G32S:D81N:T204A:E221G:S224C	amacGFP	65.2	1	501.903
E7K:K47R:L62I:Y146F:V196L	E4K:K44R:L59I:Y142F:V192L	amacGFP	91.18	1	9184.49
E36D	E33D	amacGFP	1851.96	9	8977.47
K2*:E7G:V14L:E45D:K54N:F103S:F168S	K2*:E4G:V11L:E42D:K51N:F99S:F164S	amacGFP	88.25	1	485.924
F73I:K129R:E145G:N204K:S232C:G235R	F70I:K125R:E141G:N197K:S224C:G227R	amacGFP	67.1	1	9443.53
A89S:L191S:D193Y	A86S:L187S:D189Y	amacGFP	77.77	1	7943.75
T11A:V14L:E34K:P195T	T8A:V11L:E31K:P191T	amacGFP	84.58	1	7771.74
K47R:T64S:P157S	K44R:T61S:P153S	amacGFP	64.77	1	7729.37
F133L:L181P	F129L:L177P	amacGFP	69.9	1	8027.83
Q186E:T211S:S214C	Q182E:T204S:S207C	amacGFP	37.81	1	563.36
V14L:A212V	V11L:A205V	amacGFP	1188.7	6	9369.55
V14L:K43N	V11L:K40N	amacGFP	209.53	3	7038.48
V14L:D21V	V11L:D18V	amacGFP	2024.79	8	8847.53
A39V:P77S	A36V:P74S	amacGFP	39.13	1	831.95
S1I:V14L:F148L:M240I	S1I:V11L:F144L:M232I	amacGFP	105.85	1	594.164
Q104K:M131T:S214C:H238N:Y244C	Q100K:M127T:S207C:H230N:Y236C	amacGFP	125.16	1	8779.89
G53S	G50S	amacGFP	867.94	5	8158.54
E45V:S214C	E42V:S207C	amacGFP	37.09	1	8436.49
V14L:D120Y	V11L:D116Y	amacGFP	281.99	3	8293.96
P60T:E93D	P57T:E89D	amacGFP	212.39	1	8424.09
V14L:M240T	V11L:M232T	amacGFP	1690.38	8	9523.04
D105N:I198F:F231S	D101N:I194F:F223S	amacGFP	30.92	1	951.588
G12E:V14L:K54R:T64S:D120N:H238L	G9E:V11L:K51R:T61S:D116N:H230L	amacGFP	90.7	1	8055.28
Q104L:E118D:H142N	Q100L:E114D:H138N	amacGFP	56.8	1	7878.85
H25R:N173Y:L197Q:Y244D	H22R:N169Y:L193Q:Y236D	amacGFP	108.84	1	6307.8
G6V	G3V	amacGFP	304.67	3	8616.99
T187A:F227I	T183A:F219I	amacGFP	46.29	1	13153.6
V14L:E78G:G239C	V11L:E75G:G231C	amacGFP	53.83	1	7932.35
V14L:D23N:K108E	V11L:D20N:K104E	amacGFP	57.24	1	8236.85
A89V	A86V	amacGFP	838.33	6	8648.28
V14L:F230S	V11L:F222S	amacGFP	596.4	4	8160.51
D120V:C209S	D116V:C202S	amacGFP	36.61	1	13115.3
V14L:G22C	V11L:G19C	amacGFP	744.32	5	7699.1
N83Y	N80Y	amacGFP	2560.13	15	9270.29
S88T:L197M	S85T:L193M	amacGFP	33.6	1	6050.15
F103Y:I198L:N218S	F99Y:I194L:N211S	amacGFP	76.38	1	7907.62
D241E	D233E	amacGFP	405.27	5	9723.97
K43R	K40R	amacGFP	935.87	6	9332.24
V14L:L181I	V11L:L177I	amacGFP	358.85	2	8944.9
K129E:L191S	K125E:L187S	amacGFP	58.28	1	7965.94
V16A:D21Y:I49V:H238N	V13A:D18Y:I46V:H230N	amacGFP	58.64	1	8496.57
E93V:S208C	E89V:S201C	amacGFP	119.5	1	9118.58
K28E:N204D:L243P	K25E:N197D:L235P	amacGFP	70.21	1	8773
G26S:E78G:D193G:H238N	G23S:E75G:D189G:H230N	amacGFP	46.57	1	8034.49
K43M:N149S	K40M:N145S	amacGFP	221.26	1	3911.88
H238Y	H230Y	amacGFP	627.68	4	9313.48
F73S	F70S	amacGFP	1131.13	8	7894.49
V14L:R32H:Y68H:M82L:K134R:D193V	V11L:R29H:Y65H:M79L:K130R:D189V	amacGFP	62.35	1	531.106
V14L:H25R:F231L	V11L:H22R:F223L	amacGFP	26.32	1	5872.96
K54R:M240V	K51R:M232V	amacGFP	69.46	1	10028.6
K165E	K161E	amacGFP	1755.89	12	9359.71
V14L:M131V	V11L:M127V	amacGFP	2649.88	12	8660.28
V14L:S30G:F168S	V11L:S27G:F164S	amacGFP	63.64	1	451.094
S208R:K215I	S201R:K208I	amacGFP	33.21	1	9478.64
V14L:K47M	V11L:K44M	amacGFP	1472.03	10	7276.58
V14L:K134E	V11L:K130E	amacGFP	1286.99	10	8683.42
H172L:V189A	H168L:V185A	amacGFP	118.71	2	14120.7
V14L:T64A	V11L:T61A	amacGFP	461.68	4	2065.03
T111A	T107A	amacGFP	1305.46	9	2117.49
F86Y:S208I	F83Y:S201I	amacGFP	34.4	1	7767.46
P56A	P53A	amacGFP	387.77	2	9057.87
E118D:D241V	E114D:D233V	amacGFP	31.69	1	8658.08
T100A:G194C	T96A:G190C	amacGFP	55.71	1	8497.37
S30R:N152S:N161D	S27R:N148S:N157D	amacGFP	76.65	1	7099.22
V14L:R171C	V11L:R167C	amacGFP	847.85	4	6876.33
K43R:H142L:H151Y:F227L	K40R:H138L:H147Y:F219L	amacGFP	68.46	1	1333.83
V14L:H25Y	V11L:H22Y	amacGFP	287.13	4	7412.6
K129E:V179A	K125E:V175A	amacGFP	82.81	1	6323.11
E118D:N204S	E114D:N197S	amacGFP	61.69	1	8252.72
V14L:T61S:K108E:H238N	V11L:T58S:K104E:H230N	amacGFP	31.45	1	6794.12
V14L:P157S	V11L:P153S	amacGFP	927.51	6	7426.84
N149I	N145I	amacGFP	2133.41	9	2652.81
H142R:K143R	H138R:K139R	amacGFP	67.62	1	9670.42
V14L:Y41N:D136A:N161S:N173D:Q210R	V11L:Y38N:D132A:N157S:N169D:Q203R	amacGFP	85.48	1	7585.47
V14L:F148I	V11L:F144I	amacGFP	84.84	2	788.98
H25R:L164M	H22R:L160M	amacGFP	36.17	1	1621.11
N152D:M156I:K165R:R217S	N148D:M152I:K161R:R210S	amacGFP	140.29	1	6456.46
L71F	L68F	amacGFP	278.75	2	4833.78
V14L:L191S	V11L:L187S	amacGFP	1409.19	10	8104.06
M240I	M232I	amacGFP	2101.61	12	9754.95
E78V:N138D	E75V:N134D	amacGFP	85.54	1	7509.54
E7V:V14L:N173I	E4V:V11L:N169I	amacGFP	92.16	1	5702.22
S214C	S207C	amacGFP	2421.93	15	8551.81
F73S:K159M	F70S:K155M	amacGFP	56.76	1	8330.21
K28E:Q104R:T211S	K25E:Q100R:T204S	amacGFP	38.59	1	13684.1
V14L:F168S:D216V	V11L:F164S:D209V	amacGFP	34.61	1	827.037
S1N:K2E:L17Q:C50S:D158N:Q186E	S1N:K2E:L14Q:C47S:D154N:Q182E	amacGFP	27.05	1	449
D40H:E45A:M82V:K108E	D37H:E42A:M79V:K104E	amacGFP	50.82	1	6818.03
M82K	M79K	amacGFP	646.96	8	9339.98
K129M:N188S:F227Y	K125M:N184S:F219Y	amacGFP	29.71	1	7743.73
E36D:Y109F	E33D:Y105F	amacGFP	167.56	2	8264.6
H25Y:A182G	H22Y:A178G	amacGFP	64.43	1	8992.81
H25Y:V57A	H22Y:V54A	amacGFP	28.8	1	3969.46
V14L:N167K	V11L:N163K	amacGFP	306.64	4	8716.97
H27L:S30N:L164I:Q180L:P199S	H24L:S27N:L160I:Q176L:P195S	amacGFP	30.27	1	2708.99
F102L:E175V	F98L:E171V	amacGFP	61.7	1	10269.3
V14L:Y41C:Y146N	V11L:Y38C:Y142N	amacGFP	129.02	2	6047.04
E8V	E5V	amacGFP	1701.12	13	9002.52
K2*:D38V:F73L:Y76N:E93D:I96V:S150G:Y154C:D183V:A212G	K2*:D35V:F70L:Y73N:E89D:I92V:S146G:Y150C:D179V:A205G	amacGFP	104.68	1	498.568
K2E:N83D:F102I:N204Y	K2E:N80D:F98I:N197Y	amacGFP	65.12	1	9149.3
N138I	N134I	amacGFP	1688.16	6	8897.24
V123E	V119E	amacGFP	733.63	10	7540.92
G26S:F102I	G23S:F98I	amacGFP	57.06	1	8527.82
V14L:S30C:D38E:E78D:D120N:F227I	V11L:S27C:D35E:E75D:D116N:F219I	amacGFP	40.59	1	10191
V14L:A182T:M225I	V11L:A178T:M217I	amacGFP	33.36	1	623.092
D21Y	D18Y	amacGFP	1194.68	4	9094.14
D40V:I139F	D37V:I135F	amacGFP	36.47	1	2612.63
V14L:G235V	V11L:G227V	amacGFP	612.82	2	8869.86
T51A	T48A	amacGFP	1491.98	8	9023.9
V14L:E34D:K134M:N188T	V11L:E31D:K130M:N184T	amacGFP	37.66	1	898.315
V14L:G53D	V11L:G50D	amacGFP	643.13	3	8044.51
V179E:H236I:T237L:H238T:G239A:M240W:D241T:E242S:L243C:Y244T:K245S	V175E:H228I:T229L:H230T:G231A:M232W:D233T:E234S:L235C:Y236T:K237S	amacGFP	45.28	1	9255.27
T121R:V123M	T117R:V119M	amacGFP	31.65	1	6338.68
R32L:D120V:Y146N:S208C	R29L:D116V:Y142N:S201C	amacGFP	68.88	1	5634.41
K43Q:Y95D	K40Q:Y91D	amacGFP	30.64	1	458.177
K2*:V14L	K2*:V11L	amacGFP	1221.14	7	494.785
T11S:V14L:I18T:K165M:D223V	T8S:V11L:I15T:K161M:D215V	amacGFP	29.85	1	1528.33
I70T:I126V	I67T:I122V	amacGFP	166.28	1	8044.48
V14L:M131T:M156I:G239V	V11L:M127T:M152I:G231V	amacGFP	194.97	1	8593.04
V14L:K143M	V11L:K139M	amacGFP	1420.15	6	8809.95
V14L:S214C	V11L:S207C	amacGFP	1844.24	12	8734.08
K54Q:D136G:H142L:N152S:L228Q	K51Q:D132G:H138L:N148S:L220Q	amacGFP	64.88	1	7042.03
V14L:H27R:L140Q	V11L:H24R:L136Q	amacGFP	26.77	1	8242.96
V16I:H238N	V13I:H230N	amacGFP	425.96	6	8922.42
E8G:P157S:I198F	E5G:P153S:I194F	amacGFP	153.12	1	7847.3
L140M	L136M	amacGFP	1249.88	8	9587.05
V14L:K28R:S30R:K47Q:V189A:C234W:Y244N	V11L:K25R:S27R:K44Q:V185A:C226W:Y236N	amacGFP	28.08	1	5715.92
V14L:R171C:H238R	V11L:R167C:H230R	amacGFP	79.81	1	5885.3
R99H:G137C	R95H:G133C	amacGFP	47.72	1	618.256
N162K:E229V	N158K:E221V	amacGFP	36.26	1	486.925
G6V:E78D:M131V	G3V:E75D:M127V	amacGFP	49.86	1	8385.88
V14L:E114V:D183V	V11L:E110V:D179V	amacGFP	32.04	1	8250.79
K47M:K116R	K44M:K112R	amacGFP	51.24	1	7286.83
F10S	F7S	amacGFP	185.55	4	1739.05
T61S:P92A	T58S:P88A	amacGFP	30.12	1	5655.99
G12E:N138I	G9E:N134I	amacGFP	112.83	1	7454.96
G6S:E8G:I13F:V14L:A89S:N167I:F168S	G3S:E5G:I10F:V11L:A86S:N163I:F164S	amacGFP	52.11	1	449
T100I	T96I	amacGFP	1352.19	6	9024.54
V14L:T52I	V11L:T49I	amacGFP	327.37	4	8052.96
H236L	H228L	amacGFP	1493.39	8	9812.66
S30C:D40N:Y68S:Q97L:K110Q:K129R	S27C:D37N:Y65S:Q93L:K106Q:K125R	amacGFP	198.91	1	599.887
V189D	V185D	amacGFP	1675.77	7	8217.45
E8G:M131L:G141R:T221S	E5G:M127L:G137R:T213S	amacGFP	74.28	1	8637.36
N149I:F227Y	N145I:F219Y	amacGFP	29.77	1	493.668
E8V:V14L:D38N	E5V:V11L:D35N	amacGFP	89.51	1	8326.86
T61S:M240I	T58S:M232I	amacGFP	183.03	1	8267.21
V14L:I49F:N188Y:F231L	V11L:I46F:N184Y:F223L	amacGFP	52.52	1	685.589
K54R:K165E	K51R:K161E	amacGFP	60.08	1	8422.48
Y76N:E78K:A233T	Y73N:E75K:A225T	amacGFP	32.04	1	453.982
D193E:I203F:*246R	D189E:I196F:*238R	amacGFP	58.26	1	8632.02
E145V:N167D:K169R	E141V:N163D:K165R	amacGFP	67.41	1	13738.8
S1R:V14L	S1R:V11L	amacGFP	263.52	3	9030.08
T237S	T229S	amacGFP	1529.09	4	9580.1
H184L	H180L	amacGFP	1258.58	10	527.463
Y41F:I126V:E145V:K169E:V189A:L191S	Y38F:I122V:E141V:K165E:V185A:L187S	amacGFP	62.55	1	6689.16
V14L:P157Q	V11L:P153Q	amacGFP	396.1	3	5343.76
S1G:Y154H:F231C	S1G:Y150H:F223C	amacGFP	132.71	1	1107.12
D120V:P190S	D116V:P186S	amacGFP	141.94	1	8345.29
E36V:M80L:G137D:N161T:E175K	E33V:M77L:G133D:N157T:E171K	amacGFP	37.53	1	8071.32
V14L:K129R:A160V	V11L:K125R:A156V	amacGFP	38.27	1	8584.69
G12V:H238N	G9V:H230N	amacGFP	105.62	2	7778.55
R99H:D158N:F168C	R95H:D154N:F164C	amacGFP	27.31	1	449
S30C:Y185N:H238L	S27C:Y181N:H230L	amacGFP	121.94	1	9564.65
H27L:H142Q	H24L:H138Q	amacGFP	76.61	1	8289.84
V14L:E93G	V11L:E89G	amacGFP	1176.34	5	8615.4
V14L:M156I	V11L:M152I	amacGFP	1104.19	9	8884.51
V14L:M131L:N138S:I174T	V11L:M127L:N134S:I170T	amacGFP	83.23	1	6979.54
E145V:N152Y	E141V:N148Y	amacGFP	88.01	1	8421.16
A89T	A86T	amacGFP	1741.52	11	9206.63
K43R:F227I	K40R:F219I	amacGFP	46.81	1	10100.5
N147D:Y244N	N143D:Y236N	amacGFP	28.23	1	9977.45
N149Y:K169E:D193E	N145Y:K165E:D189E	amacGFP	99.58	1	2614.02
V57G:N138Y	V54G:N134Y	amacGFP	31.93	1	2308.81
V14L:M80T	V11L:M77T	amacGFP	1529.33	6	4568.08
K43*:G53S:Q104K	K40*:G50S:Q100K	amacGFP	26.81	1	6080.89
I49F:T65S:D132G:D158G	I46F:T62S:D128G:D154G	amacGFP	46.51	1	8139.24
Y41C:P195T	Y38C:P191T	amacGFP	66.45	1	9069.36
V14L:H25L:R171L:R217S	V11L:H22L:R167L:R210S	amacGFP	109.03	1	5467.88
E145V:N147D:I198N:K245R	E141V:N143D:I194N:K237R	amacGFP	90.28	1	7380.74
N161D:D216A	N157D:D209A	amacGFP	34.28	1	6102.97
D183E	D179E	amacGFP	199.2	2	10870
T11S:E36G	T8S:E33G	amacGFP	37.87	1	10167.9
R112S:M156I:F227L	R108S:M152I:F219L	amacGFP	59.82	1	8189.42
A89V:L243P	A86V:L235P	amacGFP	45.29	1	9246.3
V14L:D183V:A212V:L243R	V11L:D179V:A205V:L235R	amacGFP	102.65	1	9234.69
V14L:K169M	V11L:K165M	amacGFP	1146.77	8	8509.27
K47R	K44R	amacGFP	1399.35	12	8080.72
V14L:L181P	V11L:L177P	amacGFP	1369.89	11	8071.48
V123A:F227L	V119A:F219L	amacGFP	136.57	1	10863.1
G12R:T100I	G9R:T96I	amacGFP	266.1	2	9313.56
V14L:Y41F:Q104H:D136V	V11L:Y38F:Q100H:D132V	amacGFP	61.65	1	7684.9
V14L:E93D:E135G:M156I	V11L:E89D:E131G:M152I	amacGFP	90.63	1	8647.99
V14L:A74S:N83D	V11L:A71S:N80D	amacGFP	56.58	1	5276.31
F230Y	F222Y	amacGFP	311.42	5	7529.33
V14L:A160T:S208T	V11L:A156T:S201T	amacGFP	43.09	1	8284.26
V14A:V31E:K47*:Q104L:Q210L:S232C	V11A:V28E:K44*:Q100L:Q203L:S224C	amacGFP	26.05	1	527.988
I198V	I194V	amacGFP	674.38	7	9300.07
V14L:R222C	V11L:R214C	amacGFP	719.43	4	8724.84
T51I:K110R:F168S:K169M:H184N:N204I	T48I:K106R:F164S:K165M:H180N:N197I	amacGFP	126.59	1	473.171
V14L:N173S	V11L:N169S	amacGFP	1371.27	8	6477.26
V14L:P77T:Y95F	V11L:P74T:Y91F	amacGFP	26.01	1	449
Y146N:H238R	Y142N:H230R	amacGFP	31.19	1	6643.44
V14L:G176D	V11L:G172D	amacGFP	790.67	5	8624.89
V14L:C234G	V11L:C226G	amacGFP	101.34	1	8321.92
T11S:F73Y	T8S:F70Y	amacGFP	62.95	1	7478.68
V14L:G141R:F231Y:H238N	V11L:G137R:F223Y:H230N	amacGFP	60.44	1	471.952
V14L:D40Y	V11L:D37Y	amacGFP	156.88	1	8541.46
V14L:D40V:D132G	V11L:D37V:D128G	amacGFP	27.45	1	8123.59
Y185S	Y181S	amacGFP	398.09	2	9616.74
V14L:I203T:Q210L	V11L:I196T:Q203L	amacGFP	37.99	1	7686.88
Y41*:W59G:T61P:L62S:V63*:T64P:T65P:L66C:S67R:Y68T:G69A:I70F:L71C:C72A:F73S:A74R:R75A:Y76T:E78N:H79T:M80*:K81R:M82*:N83T:D84T:F85S:F86S:K87S:S88P:A89P:M90C:E93K:G94A:Y95T:I96S:Q97R:E98S:R99A:T100P:I101S:F102S:F103T:Q104R:D105T:D106T:G107A:K108S:Y109T:K110R:T111P:R112V:E114R:V115*:K116S:F117S:E118R:G119A:D120T:T121H:L122W:V123*:N124T:R125A:I126S:E127S:L128*:K129R:G130A:M131W:D132T:F133S:K134R:E135R…	Y38*:W56G:T58P:L59S:V60*:T61P:T62P:L63C:S64R:Y65T:G66A:I67F:L68C:C69A:F70S:A71R:R72A:Y73T:E75N:H76T:M77*:K78R:M79*:N80T:D81T:F82S:F83S:K84S:S85P:A86P:M87C:E89K:G90A:Y91T:I92S:Q93R:E94S:R95A:T96P:I97S:F98S:F99T:Q100R:D101T:D102T:G103A:K104S:Y105T:K106R:T107P:R108V:E110R:V111*:K112S:F113S:E114R:G115A:D116T:T117H:L118W:V119*:N120T:R121A:I122S:E123S:L124*:K125R:G126A:M127W:D128T:F129S:K130R:E131R:D13…	amacGFP	72.08	1	529.542
V14L:L243M	V11L:L235M	amacGFP	324.54	3	8838.19
K110M:L191M	K106M:L187M	amacGFP	88.92	1	9267.26
H27Q:K108N	H24Q:K104N	amacGFP	40.14	1	7121.41
K169R:H238N	K165R:H230N	amacGFP	170.45	1	10039.2
T52I	T49I	amacGFP	352.81	6	9007.87
I139V:M240I	I135V:M232I	amacGFP	60.98	1	8912.38
T52I:E78D	T49I:E75D	amacGFP	185.68	1	7560.62
I18V:M90I:V166A:K169M:A182S	I15V:M87I:V162A:K165M:A178S	amacGFP	43.12	1	6167
E93A:M156V:M240I	E89A:M152V:M232I	amacGFP	80.43	1	9029.05
V14L:D21V:N152D:G239R	V11L:D18V:N148D:G231R	amacGFP	104.41	1	7485.56
Y185C	Y181C	amacGFP	1996.75	14	10073
V14L:K116M:Y146F	V11L:K112M:Y142F	amacGFP	61.9	1	8350.73
V14L:D38V:I203N	V11L:D35V:I196N	amacGFP	35.5	1	7543.91
V14L:T187A:F231Y	V11L:T183A:F223Y	amacGFP	50.16	1	684.979
V14L:S150N	V11L:S146N	amacGFP	647.05	7	7824.12
V14L:G177C:F230I	V11L:G173C:F222I	amacGFP	29.93	1	5791.58
I46V:T51I:F85Y:K143R:V196M:Q210R	I43V:T48I:F82Y:K139R:V192M:Q203R	amacGFP	37.92	1	7003.55
I96T:Y146N	I92T:Y142N	amacGFP	70.76	1	3303.57
V14L:E118V:K134M	V11L:E114V:K130M	amacGFP	60.16	1	8009.58
V14L:R171L	V11L:R167L	amacGFP	297.27	3	6387.87
E8A:V14L	E5A:V11L	amacGFP	305.45	1	8468.14
Y154C:E219G	Y150C:E212G	amacGFP	29.75	1	3377.19
V16I	V13I	amacGFP	6278.88	28	9249.11
L128M:H184N:H238N	L124M:H180N:H230N	amacGFP	46.11	1	3076.8
A89V:T121I:L181H:L191W	A86V:T117I:L177H:L187W	amacGFP	46.33	1	6707.51
V14L:K28M:M80L	V11L:K25M:M77L	amacGFP	42.68	1	8205.59
E7V:D136A	E4V:D132A	amacGFP	102.02	1	8491.97
V14L:V189D	V11L:V185D	amacGFP	760.9	7	6618.74
V14L:E19V:H238N:*246G	V11L:E16V:H230N:*238G	amacGFP	44.24	1	8653.77
E7G:H25Y:K54R:F86Y	E4G:H22Y:K51R:F83Y	amacGFP	40	1	5641.14
S30C:N152S	S27C:N148S	amacGFP	58.41	1	8287.66
V14L:Y41N:T237G	V11L:Y38N:T229G	amacGFP	43.06	1	10356.7
K134R:N167S:I203T	K130R:N163S:I196T	amacGFP	26.64	1	9899.23
K2M:D23N:V123L:E229G	K2M:D20N:V119L:E221G	amacGFP	68.83	1	527.973
E127Q:Y206F:H238N	E123Q:Y199F:H230N	amacGFP	138.4	1	9655.7
K2R:V14L:K215T	K2R:V11L:K208T	amacGFP	163.9	1	8391.4
E36V:A74S:N149S:N173S:Y206H	E33V:A71S:N145S:N169S:Y199H	amacGFP	48.42	1	3672.56
K81M:F102I:I198F	K78M:F98I:I194F	amacGFP	58.95	1	7232.23
S30R:G119D:S232N	S27R:G115D:S224N	amacGFP	92.3	1	10021.8
V14L:E127V:K129N	V11L:E123V:K125N	amacGFP	56.39	1	9255.64
E8G	E5G	amacGFP	903.57	7	9247.95
V14L:I18V:L140M	V11L:I15V:L136M	amacGFP	126.03	1	8448.81
F231L	F223L	amacGFP	3022.73	19	7158.52
V14L:R75H	V11L:R72H	amacGFP	140.42	1	9503.33
V14L:G192V	V11L:G188V	amacGFP	74.98	1	8175.59
N147I:V189I:G194D:E229D:S232G	N143I:V185I:G190D:E221D:S224G	amacGFP	29.47	1	924.557
K215I:D223N:M225I	K208I:D215N:M217I	amacGFP	26.85	1	717.184
T187M	T183M	amacGFP	1322.51	11	9786.76
N83Y:K108R:V166A:Y185H:N218S	N80Y:K104R:V162A:Y181H:N211S	amacGFP	42.17	1	9053.18
I96T	I92T	amacGFP	1761.55	12	8446.29
D40V:M90L:T100S:K108R:K116R:V226A	D37V:M87L:T96S:K104R:K112R:V218A	amacGFP	34.6	1	7732.92
G178W	G174W	amacGFP	4292.51	20	10416
T64A:M80L:H238N	T61A:M77L:H230N	amacGFP	27.84	1	1195.11
G22A	G19A	amacGFP	527.34	3	9077.34
V16I:D105N	V13I:D101N	amacGFP	127.2	1	8257.84
N188D:F230C	N184D:F222C	amacGFP	29.98	1	535.903
E127G:C209W:A212V:H238N	E123G:C202W:A205V:H230N	amacGFP	72.51	1	499.764
A233V	A225V	amacGFP	1211.87	6	8246.52
T11S:V63L	T8S:V60L	amacGFP	42.98	1	482.197
V14L:F230L	V11L:F222L	amacGFP	1320.49	5	7899.15
M90V:E118D	M87V:E114D	amacGFP	60.64	1	5100.11
F29Y:Y146N:K169T	F26Y:Y142N:K165T	amacGFP	39.54	1	5452.7
E7*:V14L:G42S:Y76H:T121S	E4*:V11L:G39S:Y73H:T117S	amacGFP	62.16	1	484.207
V14L:Q104L:T121A:F133L:N161D:N173S:F231I	V11L:Q100L:T117A:F129L:N157D:N169S:F223I	amacGFP	30.49	1	2521.82
D40E	D37E	amacGFP	377.22	4	8596.11
V14L:M131L:F231L	V11L:M127L:F223L	amacGFP	102.08	1	6199.94
F48I:Y206F	F45I:Y199F	amacGFP	119.43	1	11499.4
V14L:Y41C	V11L:Y38C	amacGFP	1094.93	4	8911.74
V14L:F117Y	V11L:F113Y	amacGFP	1497.08	8	8364.79
V14L:K81E	V11L:K78E	amacGFP	718.56	4	7799.51
R32C	R29C	amacGFP	2761.68	11	8545.67
T11A:I70T:F117L:G141R	T8A:I67T:F113L:G137R	amacGFP	97.17	1	6217.18
V14L:Y185N:A212S	V11L:Y181N:A205S	amacGFP	67.52	1	9304.13
E7D:G42C:F227V	E4D:G39C:F219V	amacGFP	79.26	1	1255.61
G107S:N152I:I198T	G103S:N148I:I194T	amacGFP	34.44	1	493.587
V14L:H79R:L128M	V11L:H76R:L124M	amacGFP	100.68	1	7528.24
A89S:Q104L:F230S	A86S:Q100L:F222S	amacGFP	87.1	1	7669.67
E7Q:S30G:L66M	E4Q:S27G:L63M	amacGFP	49.47	1	9387.11
N147Y:N188S	N143Y:N184S	amacGFP	32.97	1	1646.59
V14L:F73L:F102L:K169R:L197P	V11L:F70L:F98L:K165R:L193P	amacGFP	85.22	1	5316.37
N173S:G239S	N169S:G231S	amacGFP	90.66	1	6718.75
Y68H:D120V:A182V	Y65H:D116V:A178V	amacGFP	61.89	1	655.552
R222S	R214S	amacGFP	615.51	4	9353.83
V14L:T61S:R112S:M156I	V11L:T58S:R108S:M152I	amacGFP	76.91	1	5448.26
V14L:Y41F:N83D:K143R:V166A	V11L:Y38F:N80D:K139R:V162A	amacGFP	92.79	1	9682.94
V14L:D38Y	V11L:D35Y	amacGFP	965.81	6	8635.65
V14L:K43M:K159R:E229G	V11L:K40M:K155R:E221G	amacGFP	42.89	1	492.672
Y154N:P199S:T221S:Y244C	Y150N:P195S:T213S:Y236C	amacGFP	36.34	1	2908.31
V14L:E36D:K116M	V11L:E33D:K112M	amacGFP	88.02	1	7572.88
S1C:I101T:N162D:Y185H	S1C:I97T:N158D:Y181H	amacGFP	57.51	1	449
T52A:H79D:Q210K	T49A:H76D:Q203K	amacGFP	51.73	1	8250.51
V14L:N83Y	V11L:N80Y	amacGFP	1006.37	6	9081.62
D158Y	D154Y	amacGFP	459.71	2	7370.59
I13N:D23V:L44Q	I10N:D20V:L41Q	amacGFP	72.76	1	3317.67
V14L:E93V	V11L:E89V	amacGFP	936.76	8	9060.56
V14L:H25L	V11L:H22L	amacGFP	1710.53	7	8481.65
V14L:L197M:I198T:Y206N	V11L:L193M:I194T:Y199N	amacGFP	41.7	1	2837.57
L44V:K54R:P77S:Y244N	L41V:K51R:P74S:Y236N	amacGFP	69.38	1	9596.57
T65N:N83D:R125H:A182V	T62N:N80D:R121H:A178V	amacGFP	28.49	1	1696.38
D105N:M131V:G141V	D101N:M127V:G137V	amacGFP	54.08	1	7467.42
V14L:K129E	V11L:K125E	amacGFP	942.58	5	8546.25
E145A	E141A	amacGFP	329.39	3	10869.7
I13V:E36K	I10V:E33K	amacGFP	35	1	8025.19
I13V:V14L:D120N:E127K:F227L	I10V:V11L:D116N:E123K:F219L	amacGFP	76.87	1	10624.4
Y146N:I198V	Y142N:I194V	amacGFP	54.24	1	5659.45
M240T	M232T	amacGFP	1940.35	15	9350.42
H79Y	H76Y	amacGFP	324.56	3	8812.78
F73L	F70L	amacGFP	2818.3	17	7679.39
V14L:E36G:P60S	V11L:E33G:P57S	amacGFP	32.01	1	8131.37
D23Y	D20Y	amacGFP	1044.16	6	8807.16
K129N:H236Q	K125N:H228Q	amacGFP	36.64	1	8358.43
D40G:I96T	D37G:I92T	amacGFP	100.82	1	7061.57
R171C:Y244F	R167C:Y236F	amacGFP	39.52	1	7170.2
S1N:G35A:M80L:N188Y:R217H	S1N:G32A:M77L:N184Y:R210H	amacGFP	28.74	1	457.255
Y41F:P58T:S232R	Y38F:P55T:S224R	amacGFP	50.37	1	450.483
S1C:V14L:V196M	S1C:V11L:V192M	amacGFP	159.56	1	7412.77
H142Y	H138Y	amacGFP	1101.87	7	8829.97
V14L:N152D:I198T:E242K	V11L:N148D:I194T:E234K	amacGFP	38.7	1	6775.96
V14L:S214I	V11L:S207I	amacGFP	1084.74	7	10624.5
E34V:Y109F	E31V:Y105F	amacGFP	198.97	1	6554.25
V14L:G239S	V11L:G231S	amacGFP	421.07	6	8683.26
D158G	D154G	amacGFP	1089.05	6	8282.56
D23N	D20N	amacGFP	903.53	5	9399.23
R99C:Q104H:D132E:N152Y:V166E:Q210L	R95C:Q100H:D128E:N148Y:V162E:Q203L	amacGFP	72.96	1	458.454
Y68H:F102L:F103Y	Y65H:F98L:F99Y	amacGFP	269.18	1	462.901
E118G	E114G	amacGFP	1655.36	7	7861.81
V14M	V11M	amacGFP	2006.78	7	8741.2
I46V:G194S:R222C	I43V:G190S:R214C	amacGFP	316.19	1	9704.46
F10L:V14L:M82I:T100S:K169E:F230S	F7L:V11L:M79I:T96S:K165E:F222S	amacGFP	83.82	1	5205.64
V14L:F231I:H236Q	V11L:F223I:H228Q	amacGFP	53.36	1	6416.19
V14L:T61S:Y68H	V11L:T58S:Y65H	amacGFP	27.45	1	525.577
Y68H:F85Y	Y65H:F82Y	amacGFP	66.7	1	503.804
V14L:Y206F	V11L:Y199F	amacGFP	1037.24	5	9061.89
K2R:G42S	K2R:G39S	amacGFP	37.72	1	3736.51
V14L:F73S:R99L:D105N:V115A:R217C:F231L	V11L:F70S:R95L:D101N:V111A:R210C:F223L	amacGFP	32.01	1	674.804
D21G:K54M:E175D:I198T	D18G:K51M:E171D:I194T	amacGFP	31.46	1	7581.11
V14L:N124S:I198T:C234S	V11L:N120S:I194T:C226S	amacGFP	68.16	1	4356.39
E8K:T64S	E5K:T61S	amacGFP	40.12	1	9065.17
V14L:K116R	V11L:K112R	amacGFP	1070.95	9	8818.8
K134E:N167T:N188Y	K130E:N163T:N184Y	amacGFP	44.97	1	512.796
D38E:H142N	D35E:H138N	amacGFP	35.53	1	10925
H27Y:Q97L:L197R	H24Y:Q93L:L193R	amacGFP	82.61	1	559.246
E45D:G119D:K159M:D216G:F227V	E42D:G115D:K155M:D209G:F219V	amacGFP	71.4	1	6344.6
V14L:G69C:N167Y	V11L:G66C:N163Y	amacGFP	26.07	1	507.626
E7G:D40V:I126V:M131T:N149S	E4G:D37V:I122V:M127T:N145S	amacGFP	74.23	1	5054.57
G42S	G39S	amacGFP	777.14	7	4313.19
C234G	C226G	amacGFP	94.72	1	9525.87
V179E:V196A	V175E:V192A	amacGFP	47.76	1	7257.77
F227Y:*246W	F219Y:*238W	amacGFP	50.72	1	449
I96N:M156K	I92N:M152K	amacGFP	33.55	1	6895.38
F73I:D132G:S208G:H238K	F70I:D128G:S201G:H230K	amacGFP	114.73	1	6781.87
Y154N:N204Y:H236Q	Y150N:N197Y:H228Q	amacGFP	284.01	1	8583.13
F117Y:M156V:S208G:C234G	F113Y:M152V:S201G:C226G	amacGFP	43.29	1	2593.68
I46V:L55P:I101V:K159E	I43V:L52P:I97V:K155E	amacGFP	29.92	1	5111.33
N167Y	N163Y	amacGFP	660	6	9125.15
G137S:D193V	G133S:D189V	amacGFP	78.96	1	8947.71
V14L:K245E	V11L:K237E	amacGFP	987.54	5	8759.92
V14E:K159M	V11E:K155M	amacGFP	45.81	1	7464.42
F10Y:V166A:C234R	F7Y:V162A:C226R	amacGFP	56.86	1	9072.77
V196L	V192L	amacGFP	761	6	8838.05
V14L:I96F	V11L:I92F	amacGFP	475.48	5	3263.32
F73L:N149I:K169M	F70L:N145I:K165M	amacGFP	69.13	1	1748.28
E8*:V14L:Q104K:M156V:G177A:H238N	E5*:V11L:Q100K:M152V:G173A:H230N	amacGFP	70.09	1	449
V14L:N147S	V11L:N143S	amacGFP	1089.47	12	9342.87
Y68H:M82V:F102Y:I126F	Y65H:M79V:F98Y:I122F	amacGFP	94.45	1	486.462
F117S	F113S	amacGFP	1448.16	10	7354.14
E7D:V14L:Y41H	E4D:V11L:Y38H	amacGFP	40.42	1	9584.17
K143M:N161K:L164M	K139M:N157K:L160M	amacGFP	67.34	1	2084.69
G6D:I96V:N152Y:Q186L	G3D:I92V:N148Y:Q182L	amacGFP	31.69	1	449
V14L:D23A	V11L:D20A	amacGFP	936.05	4	8331.2
E36V:K143G:H172L:F227L	E33V:K139G:H168L:F219L	amacGFP	89.81	1	17639.6
M156T	M152T	amacGFP	2228.84	12	9322.67
D40G:N138Y:P157L:Q180R	D37G:N134Y:P153L:Q176R	amacGFP	28.6	1	2001.82
K165E:V166M:Q210L	K161E:V162M:Q203L	amacGFP	33.01	1	1657.36
G6D	G3D	amacGFP	869.83	5	8970.24
E135G	E131G	amacGFP	2741.03	8	9262.89
K134N:L191S	K130N:L187S	amacGFP	41.45	1	7649.37
F10L:L20M:F230S	F7L:L17M:F222S	amacGFP	32.78	1	7680.15
V14L:F102I:K169R	V11L:F98I:K165R	amacGFP	62.02	1	9292.51
D223V	D215V	amacGFP	2428.5	16	6540.78
V14L:K165E:I203V	V11L:K161E:I196V	amacGFP	30.64	1	8077.72
V14L:G113E	V11L:G109E	amacGFP	30.65	1	477.382
L140M:N204K:T221S:H236I:T237L:H238T:G239A:M240W:D241T:E242S:L243C:Y244T:K245S	L136M:N197K:T213S:H228I:T229L:H230T:G231A:M232W:D233T:E234S:L235C:Y236T:K237S	amacGFP	125.01	1	8754.51
V14L:K47M:E93V	V11L:K44M:E89V	amacGFP	26.41	1	7586.89
V14L:L228Q	V11L:L220Q	amacGFP	936	3	8212.5
K116M	K112M	amacGFP	1254.07	13	8801.54
G12R:M156R:K215I	G9R:M152R:K208I	amacGFP	30.11	1	7791.14
V16I:D132N	V13I:D128N	amacGFP	226.95	2	8524.74
F103Y:E135D:N138Y	F99Y:E131D:N134Y	amacGFP	47.52	1	8074.87
E8K:K108N	E5K:K104N	amacGFP	108.79	1	8513.61
K129M:H238R	K125M:H230R	amacGFP	114.91	1	9825.13
F86Y:Q104L	F83Y:Q100L	amacGFP	68.29	1	8053.78
V14L:I49V:K108E:N173D	V11L:I46V:K104E:N169D	amacGFP	33.51	1	6542.25
E114D:N162S:Q180L	E110D:N158S:Q176L	amacGFP	155.14	1	8480.74
H27L:P195T	H24L:P191T	amacGFP	113.9	1	8769.66
H27Y:A89T:Y154H	H24Y:A86T:Y150H	amacGFP	37.41	1	8337.03
V14L:V123R	V11L:V119R	amacGFP	27.06	1	6780.47
V14L:G192S:C234S	V11L:G188S:C226S	amacGFP	98.91	1	8570.06
G141R:H142R	G137R:H138R	amacGFP	36.98	1	7470.49
V14L:V123A:H236Y	V11L:V119A:H228Y	amacGFP	63	1	7413.42
C50S:G235V	C47S:G227V	amacGFP	66.31	1	7681.74
D21V:T121I:M131I:N162S	D18V:T117I:M127I:N158S	amacGFP	165.27	1	8300.69
V14L:L44V:K47M	V11L:L41V:K44M	amacGFP	57.35	1	6041.8
T51A:E135G:D193V	T48A:E131G:D189V	amacGFP	87.09	1	7540.66
T11I:M225V	T8I:M217V	amacGFP	40.49	1	769.786
Y68N:D120V:Y146H:R222C	Y65N:D116V:Y142H:R214C	amacGFP	37.82	1	556.546
E34V:D38N	E31V:D35N	amacGFP	54.39	1	8389.93
K215N:F230Y:C234S	K208N:F222Y:C226S	amacGFP	27.61	1	9510.36
F10V	F7V	amacGFP	89.6	2	7277.77
E8G:A89S	E5G:A86S	amacGFP	95.23	1	8832.87
*246.	*238.	amacGFP	307.11	4	9727.36
L140Q	L136Q	amacGFP	1511.86	8	8249.77
D21V:E114V:M131V:S214C	D18V:E110V:M127V:S207C	amacGFP	44.49	1	7995.14
V14L:T64S:G163S	V11L:T61S:G159S	amacGFP	76.56	1	4663.8
K2E:P60S:Y68H:L197P	K2E:P57S:Y65H:L193P	amacGFP	85.3	1	559.881
V14L:E118V	V11L:E114V	amacGFP	1082.08	6	8532.71
Y109C:E114V:I174T	Y105C:E110V:I170T	amacGFP	27.19	1	1791.51
T11A:T64N	T8A:T61N	amacGFP	44.96	1	464.277
V14L:M156K:M240I	V11L:M152K:M232I	amacGFP	72.58	1	8111.87
A89T:K134R:N204S	A86T:K130R:N197S	amacGFP	31.63	1	10000.1
E45G:D132A	E42G:D128A	amacGFP	83.23	1	8780.92
V14L:C234*	V11L:C226*	amacGFP	822.84	4	4517.47
V14L:D216V	V11L:D209V	amacGFP	864.01	5	10386.9
M80L:M131T	M77L:M127T	amacGFP	40	1	8787.6
I126V:V226I	I122V:V218I	amacGFP	64.84	1	7303.88
V14L:A160V	V11L:A156V	amacGFP	899.32	3	9560.96
Q104H	Q100H	amacGFP	1498.23	10	9556.35
V16I:N147S:N152Y:K169M:T237S:H238N	V13I:N143S:N148Y:K165M:T229S:H230N	amacGFP	47.4	1	9758.28
L62I:I101V	L59I:I97V	amacGFP	54.3	1	9474.36
G6C:Q180L:F231S	G3C:Q176L:F223S	amacGFP	82.41	1	1558.93
D21Y:S208G	D18Y:S201G	amacGFP	42.82	1	7270.74
K2*:T100S:D136N:R217H	K2*:T96S:D132N:R210H	amacGFP	31.72	1	511.883
E7*:T51S:E93V:N124Y:D132N:K165R	E4*:T48S:E89V:N120Y:D128N:K161R	amacGFP	36.73	1	509.048
P77H:T211A	P74H:T204A	amacGFP	91.11	1	904.655
F10L:V14L:Y154F	F7L:V11L:Y150F	amacGFP	53.87	1	7343.95
I203F	I196F	amacGFP	452.3	2	9541.55
Y95N	Y91N	amacGFP	168.63	3	510.239
Q104H:V189A	Q100H:V185A	amacGFP	167.86	1	9188.23
K54E:A160V	K51E:A156V	amacGFP	35.36	1	10054.7
V14L:N152I:T237N	V11L:N148I:T229N	amacGFP	49.85	1	12137.9
G141W:N152Y	G137W:N148Y	amacGFP	88.61	1	8210.83
M225L	M217L	amacGFP	1347.73	13	2302.65
V14L:E34V:K81R	V11L:E31V:K78R	amacGFP	70.98	1	7805.26
Q210L	Q203L	amacGFP	2702.5	12	7919.31
H142L:L191V	H138L:L187V	amacGFP	50.28	1	7700.79
D23N:F86Y:N167T	D20N:F83Y:N163T	amacGFP	31.89	1	8449.23
V14L:R217L	V11L:R210L	amacGFP	89.38	2	9284.81
E145G	E141G	amacGFP	1937.24	4	9520.16
V14L:A39T:H238R	V11L:A36T:H230R	amacGFP	64.62	1	8874.04
V14L:V63G	V11L:V60G	amacGFP	90.64	1	4419.43
L55V:P77H	L52V:P74H	amacGFP	45.95	1	7690.73
N124S:A212V:D241G:E242V	N120S:A205V:D233G:E234V	amacGFP	124.98	1	3100.42
V14L:T61S:K110R:E114G	V11L:T58S:K106R:E110G	amacGFP	59.84	1	7450.74
H27N	H24N	amacGFP	365.49	5	9045.33
V14L:V57M	V11L:V54M	amacGFP	141.52	1	5656.02
G141E	G137E	amacGFP	1312.05	5	8728.82
S150G:N188Y:S214C	S146G:N184Y:S207C	amacGFP	32.79	1	469.545
V14L:T111A:K159R:K245R	V11L:T107A:K155R:K237R	amacGFP	37.34	1	4159.44
N83D:C234R	N80D:C226R	amacGFP	52.06	1	8832.19
P157S	P153S	amacGFP	591.6	9	8467.06
T11A	T8A	amacGFP	1788.32	13	9801.57
V14L:K47Q:R171H:I198N	V11L:K44Q:R167H:I194N	amacGFP	34	1	4016
E7V:V16I:N167D	E4V:V13I:N163D	amacGFP	67.25	1	7476.84
T11I:V14L:V31E	T8I:V11L:V28E	amacGFP	35.92	1	4058.79
H27L:E118K:T187A:L191M	H24L:E114K:T183A:L187M	amacGFP	34.02	1	7769.39
Y95C:K159R:L191V	Y91C:K155R:L187V	amacGFP	53.39	1	449
A212S	A205S	amacGFP	768.22	7	8840.18
V14L:G22C:E36G:T65A:N83Y:D105G:V179A:Q180L	V11L:G19C:E33G:T62A:N80Y:D101G:V175A:Q176L	amacGFP	26.06	1	11942.1
V14L:S150G:M240K	V11L:S146G:M232K	amacGFP	86.33	1	8258.01
K2*:V14L:M240V:D241T:E242S:L243C:Y244T:K245S	K2*:V11L:M232V:D233T:E234S:L235C:Y236T:K237S	amacGFP	34.77	1	453.76
G12R:H79R	G9R:H76R	amacGFP	79.32	1	8625.67
L9Q:N152I:T187R	L6Q:N148I:T183R	amacGFP	255.28	1	12506.6
E118V	E114V	amacGFP	1709.31	11	9036.17
L55M:E93D	L52M:E89D	amacGFP	65.05	1	9095.51
K28E	K25E	amacGFP	2420.55	7	8752.18
V14L:D38Y:D241N	V11L:D35Y:D233N	amacGFP	136.76	1	8160.79
E127D	E123D	amacGFP	213.32	2	9273.62
E34G:M90L:D105G	E31G:M87L:D101G	amacGFP	128.01	1	7420.93
V14L:E118D:N147Y:N162S	V11L:E114D:N143Y:N158S	amacGFP	81.25	1	7631.92
S30R	S27R	amacGFP	730.63	8	9649.05
D216A:D223H	D209A:D215H	amacGFP	51.99	1	3760.47
E114D:R125H:M156L	E110D:R121H:M152L	amacGFP	52.56	1	5956.38
D132G:H142Q:G178W:N204Y	D128G:H138Q:G174W:N197Y	amacGFP	33.25	1	8282.56
E36V:G107C	E33V:G103C	amacGFP	36.13	1	449
G137C:D183N	G133C:D179N	amacGFP	45.08	1	7153.5
V14L:S30R:F231S:T237S	V11L:S27R:F223S:T229S	amacGFP	115.42	1	1632.57
E7*:P199L:F231Y	E4*:P195L:F223Y	amacGFP	280.86	1	492.355
I18T:Q104P:L144P:N161Y:H205L:Q210R:H238N	I15T:Q100P:L140P:N157Y:H198L:Q203R:H230N	amacGFP	38.08	1	3890.26
H25R:D136G	H22R:D132G	amacGFP	124.78	1	7931.1
F48Y:Q210R	F45Y:Q203R	amacGFP	69.38	1	4138.91
V14L:Q104L:D193G	V11L:Q100L:D189G	amacGFP	49.37	1	8106.15
E93K	E89K	amacGFP	662.46	6	9666.21
L20M:N161K	L17M:N157K	amacGFP	38.65	1	8523.98
A39G:M131L:G177S	A36G:M127L:G173S	amacGFP	39.42	1	6870.44
N173I:M240L	N169I:M232L	amacGFP	139.11	1	6374.53
S208G:H238N	S201G:H230N	amacGFP	202.09	1	8597.95
M80L:V189A:Y244*	M77L:V185A:Y236*	amacGFP	96.71	1	8205.93
V14L:N149D	V11L:N145D	amacGFP	660.9	3	2776.72
T51L	T48L	amacGFP	43.17	1	9675.24
Q180E:S214R	Q176E:S207R	amacGFP	47.21	1	6227.51
V16I:C50S:N162S	V13I:C47S:N158S	amacGFP	46.09	1	7508.01
K54E:L243P	K51E:L235P	amacGFP	35.43	1	9895.96
K143T	K139T	amacGFP	85.26	1	8179.14
D40G:S150R:K165E	D37G:S146R:K161E	amacGFP	44.79	1	9067.75
V14L:D40N:L181F	V11L:D37N:L177F	amacGFP	141.27	1	11774.9
M80L:N138S	M77L:N134S	amacGFP	126.06	1	7870.13
V14L:Y68D:N188Y	V11L:Y65D:N184Y	amacGFP	100.71	1	463.934
V14S:T51A	V11S:T48A	amacGFP	66.84	1	7721.69
I13T:F86Y:K108E	I10T:F83Y:K104E	amacGFP	64.24	1	6683.71
V14L:E242V	V11L:E234V	amacGFP	1104.78	5	8774.17
S1R:V14A:D23G:L191M:I203T	S1R:V11A:D20G:L187M:I196T	amacGFP	32.3	1	7641.35
N188L:D193A	N184L:D189A	amacGFP	36.09	1	787.647
V14L:Q104R:D183Y:I198F	V11L:Q100R:D179Y:I194F	amacGFP	39.4	1	6568.85
K2R:V14L:H172L:H238N	K2R:V11L:H168L:H230N	amacGFP	186.32	1	14740.9
S1N:V14L:G239V	S1N:V11L:G231V	amacGFP	112.16	1	8040.87
G12E:V14L	G9E:V11L	amacGFP	1125.4	8	7735.08
Y68N:F148C:M225I	Y65N:F144C:M217I	amacGFP	97.26	1	463.636
V14L:D120V	V11L:D116V	amacGFP	2404.7	10	8768.59
G6S:V14L:F48L	G3S:V11L:F45L	amacGFP	27.56	1	4653.45
V14L:V179M:Y185H:G235E	V11L:V175M:Y181H:G227E	amacGFP	216.91	1	9559.76
K2E:V14L:V16L:G235R	K2E:V11L:V13L:G227R	amacGFP	128.27	1	6852.88
V14L:G178W	V11L:G174W	amacGFP	1628.03	9	9439.82
V123A:G178R:D193G	V119A:G174R:D189G	amacGFP	68.81	1	9316.26
V14L:N149K:N218H	V11L:N145K:N211H	amacGFP	55.11	1	2789.93
F10V:V14L	F7V:V11L	amacGFP	278.11	1	7071.8
[truncated: 91,926 more rows]
