# Supplementary material for: Heterogeneity of the GFP fitness landscape and data-driven protein design
Source: eLife. 2022 May 5;11:e75842. doi: 10.7554/eLife.75842 (PMC9119679; doi:10.7554/eLife.75842)
Supplement: Source data 4. — Residue positions are labeled starting from 0 (methionine). [file elife-75842-data4.csv]

aa_genotype_pseudo	gene	aa_genotype_native	ddG_prediction
A113D	avGFP	A109D	11.647
A113D	cgreGFP	A110D	11.87
A113G	avGFP	A109G	5.411
A113G	cgreGFP	A110G	4.602
A113P	cgreGFP	A110P	19.553
A113S	avGFP	A109S	6.27
A113S	cgreGFP	A110S	1.947
A113T	avGFP	A109T	6.95
A113T	cgreGFP	A110T	8.42
A113V	cgreGFP	A110V	10.032
A119E	ppluGFP	A106E	1.382
A119G	ppluGFP	A106G	-1.426
A119P	ppluGFP	A106P	241.716
A119S	ppluGFP	A106S	-0.781
A119T	ppluGFP	A106T	2.951
A119V	ppluGFP	A106V	0.606
A150E	ppluGFP	A136E	2.356
A150G	ppluGFP	A136G	3.217
A150P	ppluGFP	A136P	0.642
A150S	ppluGFP	A136S	0.142
A150T	ppluGFP	A136T	1.861
A150V	ppluGFP	A136V	2.238
A152E	cgreGFP	A149E	1.224
A152G	cgreGFP	A149G	3.166
A152P	cgreGFP	A149P	-4.061
A152S	cgreGFP	A149S	1.655
A152T	cgreGFP	A149T	-1.822
A152V	cgreGFP	A149V	-7.151
A157T	avGFP	A153T	3.89
A157V	avGFP	A153V	1.314
A160D	amacGFP	A156D	0.032
A160D	amacV14LGFP	A156D	0.421
A160G	amacGFP	A156G	1.834
A160G	amacV14LGFP	A156G	2.076
A160P	amacGFP	A156P	11.183
A160P	amacV14LGFP	A156P	11.164
A160S	amacGFP	A156S	1.062
A160S	amacV14LGFP	A156S	1.312
A160T	amacGFP	A156T	1.053
A160T	amacV14LGFP	A156T	1.376
A160V	amacGFP	A156V	1.37
A160V	amacV14LGFP	A156V	1.51
A169D	ppluGFP	A154D	2.098
A169G	ppluGFP	A154G	2.568
A169P	ppluGFP	A154P	1.09
A169S	ppluGFP	A154S	1.286
A169T	ppluGFP	A154T	-0.139
A169V	ppluGFP	A154V	-1.375
A171D	cgreGFP	A168D	4.272
A171G	cgreGFP	A168G	2.369
A171P	cgreGFP	A168P	5.229
A171S	cgreGFP	A168S	2.891
A171T	cgreGFP	A168T	0.602
A171V	cgreGFP	A168V	-0.272
A182D	amacGFP	A178D	9.984
A182D	cgreGFP	A179D	6.717
A182G	amacGFP	A178G	8.474
A182G	amacV14LGFP	A178G	8.486
A182G	cgreGFP	A179G	7.259
A182P	avGFP	A178P	13.864
A182P	cgreGFP	A179P	14.807
A182S	amacGFP	A178S	4.343
A182S	amacV14LGFP	A178S	3.714
A182S	avGFP	A178S	5.215
A182S	cgreGFP	A179S	3.828
A182T	amacGFP	A178T	4.945
A182T	amacV14LGFP	A178T	4.96
A182T	avGFP	A178T	8.88
A182T	cgreGFP	A179T	3.074
A182V	amacGFP	A178V	1.081
A182V	amacV14LGFP	A178V	1.895
A182V	avGFP	A178V	4.904
A182V	cgreGFP	A179V	-1.861
A185D	cgreGFP	A182D	0.702
A185G	cgreGFP	A182G	4.413
A185P	cgreGFP	A182P	4.951
A185S	cgreGFP	A182S	-0.824
A185T	cgreGFP	A182T	-0.264
A185V	cgreGFP	A182V	0.993
A193E	cgreGFP	A190E	0.54
A193E	ppluGFP	A178E	3.318
A193G	cgreGFP	A190G	1.61
A193G	ppluGFP	A178G	0.35
A193P	cgreGFP	A190P	5.797
A193P	ppluGFP	A178P	625.317
A193S	cgreGFP	A190S	-0.535
A193S	ppluGFP	A178S	2.863
A193T	cgreGFP	A190T	-0.908
A193T	ppluGFP	A178T	6.776
A193V	cgreGFP	A190V	1.15
A193V	ppluGFP	A178V	17.394
A207D	ppluGFP	A192D	1.075
A207G	ppluGFP	A192G	7.936
A207P	ppluGFP	A192P
A207S	ppluGFP	A192S	2.441
A207T	ppluGFP	A192T	-1.916
A207V	ppluGFP	A192V	-7.764
A212D	amacGFP	A205D	1.755
A212D	amacV14LGFP	A205D	1.641
A212D	avGFP	A205D	4.112
A212G	amacGFP	A205G	3.791
A212G	amacV14LGFP	A205G	2.67
A212G	avGFP	A205G	3.725
A212S	amacGFP	A205S	-0.434
A212S	amacV14LGFP	A205S	-0.463
A212S	avGFP	A205S	0.001
A212T	amacGFP	A205T	-0.32
A212T	amacV14LGFP	A205T	0.584
A212T	avGFP	A205T	1.446
A212V	amacGFP	A205V	-1.218
A212V	amacV14LGFP	A205V	-2.466
A212V	avGFP	A205V	1.902
A233D	amacGFP	A225D	12.064
A233D	amacV14LGFP	A225D	12.276
A233D	avGFP	A225D	7.877
A233D	cgreGFP	A227D	8.953
A233D	ppluGFP	A213D	9.443
A233G	amacGFP	A225G	7.424
A233G	amacV14LGFP	A225G	7.509
A233G	cgreGFP	A227G	5.619
A233G	ppluGFP	A213G	4.261
A233I	amacGFP	A225I	5.312
A233P	amacGFP	A225P	11.177
A233P	amacV14LGFP	A225P	10.144
A233P	cgreGFP	A227P	13.823
A233P	ppluGFP	A213P	12.695
A233S	amacGFP	A225S	5.673
A233S	amacV14LGFP	A225S	5.556
A233S	avGFP	A225S	4.687
A233S	cgreGFP	A227S	3.077
A233S	ppluGFP	A213S	3.608
A233T	amacGFP	A225T	5.218
A233T	amacV14LGFP	A225T	5.342
A233T	avGFP	A225T	10.025
A233T	cgreGFP	A227T	0.557
A233T	ppluGFP	A213T	3.742
A233V	amacGFP	A225V	4.345
A233V	amacV14LGFP	A225V	4.392
A233V	avGFP	A225V	5.377
A233V	cgreGFP	A227V	-1.097
A234D	avGFP	A226D	0.873
A234P	avGFP	A226P	7.74
A234S	avGFP	A226S	0.482
A234T	avGFP	A226T	1.848
A234V	avGFP	A226V	0.314
A2D	ppluGFP	A2D	4.734
A2G	ppluGFP	A2G	1.873
A2P	ppluGFP	A2P	-2.216
A2S	ppluGFP	A2S	-0.619
A2T	ppluGFP	A2T	-2.361
A2V	ppluGFP	A2V	0.341
A39D	amacGFP	A36D	9.808
A39D	amacV14LGFP	A36D	10.281
A39D	avGFP	A36D	8.402
A39D	cgreGFP	A39D	6.952
A39G	amacGFP	A36G	3.46
A39G	amacV14LGFP	A36G	4.489
A39G	avGFP	A36G	3.274
A39G	cgreGFP	A39G	2.296
A39P	amacGFP	A36P	-1.634
A39P	amacV14LGFP	A36P	-1.521
A39P	avGFP	A36P	2.476
A39P	cgreGFP	A39P	-1.184
A39S	amacGFP	A36S	1.55
A39S	amacV14LGFP	A36S	2.328
A39S	avGFP	A36S	1.631
A39S	cgreGFP	A39S	1.774
A39T	amacGFP	A36T	6.523
A39T	amacV14LGFP	A36T	5.636
A39T	avGFP	A36T	5.926
A39T	cgreGFP	A39T	5.179
A39V	amacGFP	A36V	7.407
A39V	amacV14LGFP	A36V	6.134
A39V	avGFP	A36V	10.065
A39V	cgreGFP	A39V	3.643
A46E	cgreGFP	A46E	7.468
A46G	cgreGFP	A46G	6.248
A46P	cgreGFP	A46P	17.869
A46S	cgreGFP	A46S	4.76
A46T	cgreGFP	A46T	6.368
A46V	cgreGFP	A46V	1.498
A54E	ppluGFP	A43E	1.455
A54G	ppluGFP	A43G	1.007
A54P	ppluGFP	A43P	12.193
A54S	ppluGFP	A43S	-0.198
A54T	ppluGFP	A43T	2.228
A54V	ppluGFP	A43V	2.713
A60D	cgreGFP	A60D	13.758
A60E	cgreGFP	A60E	20.967
A60P	cgreGFP	A60P	14.226
A60S	cgreGFP	A60S	5.243
A60T	cgreGFP	A60T	9.855
A60V	cgreGFP	A60V	4.96
A74D	cgreGFP	A74D	11.59
A74G	amacGFP	A71G	6.575
A74G	amacV14LGFP	A71G	6.17
A74G	cgreGFP	A74G	6.321
A74P	amacGFP	A71P	12.857
A74P	cgreGFP	A74P	16.05
A74S	amacGFP	A71S	4.469
A74S	amacV14LGFP	A71S	4.327
A74S	cgreGFP	A74S	4.94
A74T	amacGFP	A71T	3.253
A74T	amacV14LGFP	A71T	3.996
A74T	cgreGFP	A74T	1.97
A74V	amacGFP	A71V	-0.783
A74V	amacV14LGFP	A71V	-0.738
A74V	cgreGFP	A74V	2.889
A7E	cgreGFP	A7E	-0.146
A7G	cgreGFP	A7G	4.463
A7P	cgreGFP	A7P	6.841
A7S	cgreGFP	A7S	1.68
A7T	cgreGFP	A7T	0.696
A7V	cgreGFP	A7V	-0.39
A81E	cgreGFP	A81E	5.712
A81G	cgreGFP	A81G	4.023
A81P	cgreGFP	A81P	-3.724
A81S	cgreGFP	A81S	1.938
A81T	cgreGFP	A81T	3.433
A81V	cgreGFP	A81V	5.058
A89D	amacGFP	A86D	8.837
A89D	ppluGFP	A76D	-0.811
A89G	amacGFP	A86G	6.806
A89G	amacV14LGFP	A86G	6.903
A89G	avGFP	A86G	7.842
A89G	ppluGFP	A76G	-2.929
A89P	amacGFP	A86P	25.858
A89P	avGFP	A86P	29.358
A89P	ppluGFP	A76P	729.846
A89S	amacGFP	A86S	3.831
A89S	amacV14LGFP	A86S	3.642
A89S	avGFP	A86S	3.887
A89S	ppluGFP	A76S	-1.649
A89T	amacGFP	A86T	0.491
A89T	amacV14LGFP	A86T	0.523
A89T	avGFP	A86T	4.817
A89T	ppluGFP	A76T	9.435
A89V	amacGFP	A86V	-1.28
A89V	amacV14LGFP	A86V	-1.522
A89V	avGFP	A86V	2.703
A89V	ppluGFP	A76V	14.909
C18F	ppluGFP	C7F	19.763
C18G	ppluGFP	C7G	9.426
C18R	ppluGFP	C7R	18.114
C18S	ppluGFP	C7S	5.067
C18Y	ppluGFP	C7Y	17.073
C209F	amacGFP	C202F	-9.621
C209F	amacV14LGFP	C202F	-9.789
C209G	amacGFP	C202G	8.229
C209H	amacGFP	C202H	-4.338
C209L	amacGFP	C202L	-2.342
C209R	amacGFP	C202R	9.998
C209S	amacGFP	C202S	5.294
C209S	amacV14LGFP	C202S	5.101
C209W	amacGFP	C202W	-6.875
C209W	amacV14LGFP	C202W	-7.096
C209Y	amacGFP	C202Y	-5.217
C209Y	amacV14LGFP	C202Y	-6.298
C234F	amacGFP	C226F	-2.156
C234F	amacV14LGFP	C226F	-1.944
C234G	amacGFP	C226G	2.8
C234G	amacV14LGFP	C226G	2.962
C234P	amacGFP	C226P	5.52
C234R	amacGFP	C226R	-1.463
C234R	amacV14LGFP	C226R	-1.34
C234S	amacGFP	C226S	-1.015
C234S	amacV14LGFP	C226S	-0.367
C234W	amacGFP	C226W	-0.471
C234W	amacV14LGFP	C226W	-0.31
C234Y	amacGFP	C226Y	-1.963
C234Y	amacV14LGFP	C226Y	-1.907
C50F	cgreGFP	C50F	23.067
C50G	amacGFP	C47G	9.602
C50G	amacV14LGFP	C47G	9.004
C50G	cgreGFP	C50G	9.362
C50R	amacGFP	C47R	26.335
C50R	avGFP	C47R	22.67
C50R	cgreGFP	C50R	43.505
C50S	amacGFP	C47S	4.194
C50S	amacV14LGFP	C47S	4.149
C50S	avGFP	C47S	3.728
C50S	cgreGFP	C50S	3.554
C50W	cgreGFP	C50W	46.639
C50Y	amacGFP	C47Y	18.927
C50Y	amacV14LGFP	C47Y	17.204
C50Y	cgreGFP	C50Y	21.238
C72F	amacGFP	C69F	18.478
C72F	amacV14LGFP	C69F	18.128
C72F	cgreGFP	C72F	16.091
C72G	amacGFP	C69G	5.261
C72G	amacV14LGFP	C69G	5.167
C72G	avGFP	C69G	9.251
C72G	cgreGFP	C72G	6.056
C72R	amacGFP	C69R	31.852
C72R	avGFP	C69R	15.969
C72R	cgreGFP	C72R	25.748
C72S	amacGFP	C69S	2.397
C72S	amacV14LGFP	C69S	1.814
C72S	avGFP	C69S	3.859
C72S	cgreGFP	C72S	3.348
C72W	cgreGFP	C72W	33.372
C72Y	amacGFP	C69Y	23.515
C72Y	avGFP	C69Y	18.586
C72Y	cgreGFP	C72Y	21.271
D104A	cgreGFP	D101A	3.066
D104E	cgreGFP	D101E	3.975
D104G	cgreGFP	D101G	6.556
D104H	cgreGFP	D101H	5.663
D104N	cgreGFP	D101N	4.693
D104T	cgreGFP	D101T	3.797
D104V	cgreGFP	D101V	1.916
D104Y	cgreGFP	D101Y	3.323
D105A	amacGFP	D101A	2.364
D105A	avGFP	D101A	2.288
D105A	ppluGFP	D92A
D105E	amacGFP	D101E	1.751
D105E	avGFP	D101E	1.578
D105E	ppluGFP	D92E
D105G	amacGFP	D101G	0.515
D105G	amacV14LGFP	D101G	0.474
D105G	avGFP	D101G	0.771
D105G	ppluGFP	D92G
D105H	amacGFP	D101H	0.414
D105H	amacV14LGFP	D101H	0.367
D105H	avGFP	D101H	1.675
D105N	amacGFP	D101N	-1.306
D105N	amacV14LGFP	D101N	-1.238
D105N	avGFP	D101N	-0.618
D105N	ppluGFP	D92N
D105V	amacGFP	D101V	16.112
D105V	avGFP	D101V	15.5
D105V	ppluGFP	D92V
D105Y	amacGFP	D101Y	1.807
D105Y	amacV14LGFP	D101Y	1.729
D105Y	avGFP	D101Y	3.01
D105Y	ppluGFP	D92Y
D106A	amacGFP	D102A	7.555
D106A	cgreGFP	D103A	6.125
D106E	amacGFP	D102E	6.899
D106E	amacV14LGFP	D102E	6.984
D106E	avGFP	D102E	5.212
D106E	cgreGFP	D103E	4.252
D106G	amacGFP	D102G	7.555
D106G	amacV14LGFP	D102G	7.595
D106G	avGFP	D102G	5.848
D106G	cgreGFP	D103G	6.498
D106H	amacGFP	D102H	16.079
D106H	cgreGFP	D103H	9.042
D106N	amacGFP	D102N	4.714
D106N	avGFP	D102N	-0.595
D106N	cgreGFP	D103N	2.62
D106V	amacGFP	D102V	12.142
D106V	cgreGFP	D103V	9.16
D106Y	amacGFP	D102Y	18.476
D106Y	cgreGFP	D103Y	5.953
D110E	cgreGFP	D107E	-1.115
D110G	cgreGFP	D107G	5.171
D110H	cgreGFP	D107H	-0.964
D110N	cgreGFP	D107N	-1.255
D120A	amacGFP	D116A	1.273
D120A	amacV14LGFP	D116A	1.892
D120A	avGFP	D116A	1.493
D120C	amacGFP	D116C	3.191
D120E	amacGFP	D116E	0.044
D120E	amacV14LGFP	D116E	0.485
D120E	avGFP	D116E	0.177
D120G	amacGFP	D116G	2.434
D120G	amacV14LGFP	D116G	2.65
D120G	avGFP	D116G	2.339
D120H	amacGFP	D116H	2.041
D120N	amacGFP	D116N	-0.029
D120N	amacV14LGFP	D116N	0.028
D120N	avGFP	D116N	-0.3
D120S	amacGFP	D116S	0.107
D120V	amacGFP	D116V	1.836
D120V	amacV14LGFP	D116V	2.076
D120V	avGFP	D116V	1.803
D120Y	amacGFP	D116Y	2.17
D120Y	amacV14LGFP	D116Y	1.433
D125A	ppluGFP	D112A	-1.592
D125E	ppluGFP	D112E	-3.42
D125G	ppluGFP	D112G	5.705
D125N	ppluGFP	D112N	-1.897
D125V	ppluGFP	D112V	-4.792
D125Y	ppluGFP	D112Y	-7.271
D132A	amacGFP	D128A	1.888
D132A	amacV14LGFP	D128A	2.42
D132A	avGFP	D128A	0.673
D132E	amacGFP	D128E	1.436
D132E	amacV14LGFP	D128E	0.839
D132E	avGFP	D128E	-0.543
D132G	amacGFP	D128G	0.326
D132G	amacV14LGFP	D128G	0.655
D132G	avGFP	D128G	1.351
D132H	amacGFP	D128H	0.299
D132H	amacV14LGFP	D128H	0.504
D132N	amacGFP	D128N	-0.527
D132N	amacV14LGFP	D128N	-0.325
D132N	avGFP	D128N	-1.263
D132V	amacGFP	D128V	13.775
D132V	amacV14LGFP	D128V	13.985
D132V	avGFP	D128V	11.733
D132Y	amacGFP	D128Y	0.572
D132Y	amacV14LGFP	D128Y	0.737
D132Y	avGFP	D128Y	1.274
D136A	amacGFP	D132A	3.085
D136A	amacV14LGFP	D132A	2.85
D136A	avGFP	D132A	1.363
D136A	ppluGFP	D123A	0.816
D136E	amacGFP	D132E	1.835
D136E	amacV14LGFP	D132E	1.776
D136E	avGFP	D132E	-0.18
D136E	ppluGFP	D123E	-0.222
D136G	amacGFP	D132G	3.602
D136G	amacV14LGFP	D132G	3.689
D136G	avGFP	D132G	2.026
D136G	ppluGFP	D123G	1.861
D136H	amacGFP	D132H	1.4
D136H	avGFP	D132H	-0.017
D136H	ppluGFP	D123H	0.736
D136N	amacGFP	D132N	1.02
D136N	amacV14LGFP	D132N	0.886
D136N	avGFP	D132N	-0.709
D136N	ppluGFP	D123N	-0.396
D136S	amacGFP	D132S	3.013
D136V	amacGFP	D132V	2.511
D136V	amacV14LGFP	D132V	2.427
D136V	avGFP	D132V	-4.519
D136Y	amacGFP	D132Y	1.861
D136Y	amacV14LGFP	D132Y	2.537
D136Y	avGFP	D132Y	0.136
D136Y	ppluGFP	D123Y	0.456
D142A	ppluGFP	D129A	1.624
D142E	ppluGFP	D129E	1.435
D142G	ppluGFP	D129G	-0.092
D142H	ppluGFP	D129H	-0.408
D142N	ppluGFP	D129N	-0.849
D142V	ppluGFP	D129V	12.182
D142Y	ppluGFP	D129Y	-2.604
D158A	amacGFP	D154A	2.088
D158A	amacV14LGFP	D154A	1.705
D158A	avGFP	D154A	3.479
D158A	cgreGFP	D155A	0.947
D158E	amacGFP	D154E	4.788
D158E	amacV14LGFP	D154E	4.684
D158E	avGFP	D154E	3.441
D158E	cgreGFP	D155E	4.583
D158G	amacGFP	D154G	8.443
D158G	amacV14LGFP	D154G	8.2
D158G	avGFP	D154G	8.044
D158G	cgreGFP	D155G	7.762
D158H	amacGFP	D154H	1.976
D158H	cgreGFP	D155H	3.367
D158N	amacGFP	D154N	1.673
D158N	amacV14LGFP	D154N	1.419
D158N	avGFP	D154N	0.534
D158N	cgreGFP	D155N	-0.313
D158V	amacGFP	D154V	6.75
D158V	amacV14LGFP	D154V	6.579
D158V	avGFP	D154V	3.246
D158V	cgreGFP	D155V	4.95
D158Y	amacGFP	D154Y	4.451
D158Y	amacV14LGFP	D154Y	4.219
D158Y	cgreGFP	D155Y	3.44
D161A	ppluGFP	D146A	2.732
D161E	ppluGFP	D146E	2.915
D161G	ppluGFP	D146G	5.735
D161H	ppluGFP	D146H	4.449
D161N	ppluGFP	D146N	3.62
D161V	ppluGFP	D146V	0.321
D161Y	ppluGFP	D146Y	3.226
D173A	cgreGFP	D170A	-0.032
D173E	cgreGFP	D170E	0.089
D173G	cgreGFP	D170G	4.299
D173H	cgreGFP	D170H	-1.756
D173N	cgreGFP	D170N	-1.137
D173V	cgreGFP	D170V	-1.808
D173Y	cgreGFP	D170Y	-2.048
D176A	avGFP	D172A	4.627
D176A	ppluGFP	D161A	3.203
D176E	ppluGFP	D161E	-0.553
D176G	avGFP	D172G	6.205
D176G	ppluGFP	D161G	4.431
D176H	avGFP	D172H	4.656
D176H	ppluGFP	D161H	3.36
D176N	avGFP	D172N	0.157
D176N	ppluGFP	D161N	0.35
D176V	avGFP	D172V	5.631
D176V	ppluGFP	D161V	3.97
D176Y	ppluGFP	D161Y	1.974
D183A	amacGFP	D179A	0.439
D183A	amacV14LGFP	D179A	0.388
D183A	avGFP	D179A	-3.36
D183E	amacGFP	D179E	-1.767
D183E	amacV14LGFP	D179E	-1.788
D183E	avGFP	D179E	-3.517
D183G	amacGFP	D179G	6.028
D183G	amacV14LGFP	D179G	5.32
D183G	avGFP	D179G	3.08
D183H	amacGFP	D179H	0.238
D183H	avGFP	D179H	-2.467
D183N	amacGFP	D179N	-0.954
D183N	amacV14LGFP	D179N	-0.81
D183N	avGFP	D179N	-1.116
D183V	amacGFP	D179V	-1.572
D183V	amacV14LGFP	D179V	-1.392
D183V	avGFP	D179V	-5.922
D183Y	amacGFP	D179Y	-6.391
D183Y	amacV14LGFP	D179Y	-6.396
D183Y	avGFP	D179Y	-4.974
D185A	ppluGFP	D170A	0.64
D185E	ppluGFP	D170E	-1.337
D185G	ppluGFP	D170G	4.957
D185N	ppluGFP	D170N	-0.712
D185V	ppluGFP	D170V	-3.71
D185Y	ppluGFP	D170Y	-3.052
D193A	amacGFP	D189A	1.848
D193A	avGFP	D189A	1.975
D193E	amacGFP	D189E	-0.184
D193E	amacV14LGFP	D189E	0.015
D193G	amacGFP	D189G	1.983
D193G	amacV14LGFP	D189G	2.204
D193G	avGFP	D189G	2.336
D193H	amacGFP	D189H	-0.091
D193H	amacV14LGFP	D189H	0.17
D193I	amacGFP	D189I	1.212
D193N	amacGFP	D189N	-0.414
D193N	amacV14LGFP	D189N	-0.179
D193N	avGFP	D189N	-0.317
D193V	amacGFP	D189V	0.929
D193V	amacV14LGFP	D189V	1.084
D193V	avGFP	D189V	1.285
D193Y	amacGFP	D189Y	0.603
D193Y	amacV14LGFP	D189Y	0.684
D197A	cgreGFP	D194A	0.181
D197E	cgreGFP	D194E	-0.228
D197G	cgreGFP	D194G	4.108
D197N	cgreGFP	D194N	-0.915
D197V	cgreGFP	D194V	1.344
D197Y	cgreGFP	D194Y	0.104
D203A	avGFP	D196A	-1.099
D203E	avGFP	D196E	-0.332
D203G	avGFP	D196G	-2.021
D203N	avGFP	D196N	-2.032
D203V	avGFP	D196V	1.801
D203Y	avGFP	D196Y	0.433
D216A	amacGFP	D209A	12.917
D216A	amacV14LGFP	D209A	11.78
D216E	amacGFP	D209E	6.055
D216E	amacV14LGFP	D209E	6.898
D216E	cgreGFP	D210E	6.673
D216G	amacGFP	D209G	16.179
D216G	amacV14LGFP	D209G	15.923
D216G	avGFP	D209G	12.216
D216G	cgreGFP	D210G	12.543
D216H	amacGFP	D209H	4.319
D216N	amacGFP	D209N	10.493
D216N	amacV14LGFP	D209N	4.583
D216N	avGFP	D209N	2.807
D216N	cgreGFP	D210N	4.266
D216V	amacGFP	D209V	11.297
D216V	amacV14LGFP	D209V	10.19
D216V	avGFP	D209V	1.67
D216V	cgreGFP	D210V	4.482
D216Y	amacGFP	D209Y	6.579
D216Y	amacV14LGFP	D209Y	5.384
D216Y	cgreGFP	D210Y	7.08
D218A	cgreGFP	D212A	1.136
D218E	cgreGFP	D212E	0.674
D218G	cgreGFP	D212G	1.616
D218H	cgreGFP	D212H	-0.604
D218N	cgreGFP	D212N	-0.868
D218V	cgreGFP	D212V	2.367
D218Y	cgreGFP	D212Y	-0.333
D219A	cgreGFP	D213A	10.63
D219E	cgreGFP	D213E	10.183
D219G	cgreGFP	D213G	16.422
D219H	cgreGFP	D213H	14.415
D219N	cgreGFP	D213N	5.733
D219V	cgreGFP	D213V	7.957
D219Y	cgreGFP	D213Y	18.291
D21A	amacGFP	D18A	0.056
D21A	amacV14LGFP	D18A	-0.663
D21A	avGFP	D18A	-0.882
D21E	amacGFP	D18E	-0.088
D21E	amacV14LGFP	D18E	-1.137
D21E	avGFP	D18E	-0.923
D21G	amacGFP	D18G	4.654
D21G	amacV14LGFP	D18G	4.107
D21G	avGFP	D18G	3.436
D21H	amacGFP	D18H	-0.498
D21H	amacV14LGFP	D18H	-3.413
D21H	avGFP	D18H	-2.944
D21N	amacGFP	D18N	-0.612
D21N	amacV14LGFP	D18N	-2.293
D21N	avGFP	D18N	-1.539
D21S	amacGFP	D18S	-0.106
D21V	amacGFP	D18V	-2.94
D21V	amacV14LGFP	D18V	-3.892
D21V	avGFP	D18V	-3.902
D21Y	amacGFP	D18Y	-3.634
D21Y	amacV14LGFP	D18Y	-4.475
D220A	cgreGFP	D214A	1.074
D220E	cgreGFP	D214E	-0.227
D220G	cgreGFP	D214G	1.415
D220N	cgreGFP	D214N	-1.392
D220V	cgreGFP	D214V	0.11
D220Y	cgreGFP	D214Y	-2.331
D223A	amacGFP	D215A	5.073
D223A	cgreGFP	D217A	6.274
D223C	amacGFP	D215C	3.859
D223C	amacV14LGFP	D215C	3.193
D223E	amacGFP	D215E	2.285
D223E	amacV14LGFP	D215E	1.742
D223E	avGFP	D215E	1.729
D223E	cgreGFP	D217E	4.829
D223G	amacGFP	D215G	9.228
D223G	amacV14LGFP	D215G	8.949
D223G	avGFP	D215G	8.532
D223G	cgreGFP	D217G	11.044
D223H	amacGFP	D215H	4.68
D223H	amacV14LGFP	D215H	3.843
D223H	cgreGFP	D217H	3.424
D223N	amacGFP	D215N	4.292
D223N	amacV14LGFP	D215N	3.754
D223N	avGFP	D215N	3.378
D223N	cgreGFP	D217N	4.119
D223V	amacGFP	D215V	3.199
D223V	amacV14LGFP	D215V	2.61
D223V	cgreGFP	D217V	4.972
D223Y	amacGFP	D215Y	2.832
D223Y	cgreGFP	D217Y	4.537
D235A	cgreGFP	D229A	3.513
D235E	cgreGFP	D229E	2.416
D235G	cgreGFP	D229G	7.609
D235H	cgreGFP	D229H	4.465
D235N	cgreGFP	D229N	2.256
D235V	cgreGFP	D229V	1.611
D235Y	cgreGFP	D229Y	5.896
D23A	amacGFP	D20A	0.966
D23A	amacV14LGFP	D20A	1.222
D23A	avGFP	D20A	0.92
D23A	cgreGFP	D23A	1.485
D23E	amacGFP	D20E	-0.187
D23E	amacV14LGFP	D20E	0.185
D23E	cgreGFP	D23E	0.819
D23G	amacGFP	D20G	6.66
D23G	amacV14LGFP	D20G	6.913
D23G	avGFP	D20G	6.499
D23G	cgreGFP	D23G	6.742
D23H	amacGFP	D20H	2.24
D23H	amacV14LGFP	D20H	2.067
D23H	avGFP	D20H	3.347
D23H	cgreGFP	D23H	4.142
D23N	amacGFP	D20N	0.68
D23N	amacV14LGFP	D20N	-0.143
D23N	avGFP	D20N	-0.21
D23N	cgreGFP	D23N	0.101
D23S	amacGFP	D20S	1.024
D23V	amacGFP	D20V	-1.477
D23V	amacV14LGFP	D20V	-1.21
D23V	avGFP	D20V	-0.727
D23V	cgreGFP	D23V	-0.979
D23Y	amacGFP	D20Y	1.931
D23Y	amacV14LGFP	D20Y	2.71
D23Y	cgreGFP	D23Y	4.214
D38A	amacGFP	D35A	0.729
D38A	avGFP	D35A	4.629
D38A	cgreGFP	D38A	4.183
D38C	amacGFP	D35C	0.431
D38E	amacGFP	D35E	1.057
D38E	amacV14LGFP	D35E	0.575
D38E	avGFP	D35E	2.683
D38E	cgreGFP	D38E	3.821
D38G	amacGFP	D35G	8.476
D38G	amacV14LGFP	D35G	7.07
D38G	avGFP	D35G	11.599
D38G	cgreGFP	D38G	10.851
D38H	amacGFP	D35H	-0.866
D38H	avGFP	D35H	0.692
D38H	cgreGFP	D38H	2.08
D38K	avGFP	D35K	4.489
D38N	amacGFP	D35N	-0.479
D38N	amacV14LGFP	D35N	-1.807
D38N	avGFP	D35N	-0.337
D38N	cgreGFP	D38N	0.322
D38V	amacGFP	D35V	-1.943
D38V	amacV14LGFP	D35V	-1.8
D38V	avGFP	D35V	1.977
D38V	cgreGFP	D38V	1.395
D38Y	amacGFP	D35Y	1.928
D38Y	amacV14LGFP	D35Y	2.155
D38Y	avGFP	D35Y	0.497
D38Y	cgreGFP	D38Y	0.04
D40A	amacGFP	D37A	-0.519
D40A	amacV14LGFP	D37A	-0.377
D40E	amacGFP	D37E	0.755
D40E	amacV14LGFP	D37E	0.87
D40G	amacGFP	D37G	2.452
D40G	amacV14LGFP	D37G	2.487
D40H	amacGFP	D37H	1.171
D40H	amacV14LGFP	D37H	1.249
D40N	amacGFP	D37N	0.146
D40N	amacV14LGFP	D37N	0.223
D40V	amacGFP	D37V	2.451
D40V	amacV14LGFP	D37V	2.553
D40Y	amacGFP	D37Y	-0.034
D40Y	amacV14LGFP	D37Y	0.122
D54A	cgreGFP	D54A	0.528
D54E	cgreGFP	D54E	-0.094
D54G	cgreGFP	D54G	2.718
D54N	cgreGFP	D54N	0.824
D54V	cgreGFP	D54V	0.259
D54Y	cgreGFP	D54Y	-1.267
D78A	avGFP	D75A	1.62
D78E	avGFP	D75E	1.702
D78G	avGFP	D75G	3.673
D78N	avGFP	D75N	1.495
D78V	avGFP	D75V	2.987
D78Y	avGFP	D75Y	2.283
D84A	amacGFP	D81A	-1.138
D84A	cgreGFP	D82A	0.605
D84E	amacGFP	D81E	5.975
D84E	cgreGFP	D82E	1.369
D84G	amacGFP	D81G	4.445
D84G	cgreGFP	D82G	6.523
D84H	amacGFP	D81H	6.345
D84H	cgreGFP	D82H	4.17
D84N	amacGFP	D81N	0.827
D84N	amacV14LGFP	D81N	1.088
D84N	avGFP	D81N	-1.316
D84N	cgreGFP	D82N	-0.15
D84V	avGFP	D81V	1.824
D84V	cgreGFP	D82V	-0.115
D84Y	amacGFP	D81Y	4.315
D84Y	cgreGFP	D82Y	2.932
D93A	cgreGFP	D90A	4.082
D93C	cgreGFP	D90C	6.859
D93E	cgreGFP	D90E	4.635
D93G	cgreGFP	D90G	7.746
D93H	cgreGFP	D90H	2.401
D93N	cgreGFP	D90N	6.354
D93S	cgreGFP	D90S	6.781
D93V	cgreGFP	D90V	4.775
D93Y	cgreGFP	D90Y	4.142
D98A	cgreGFP	D95A	0.214
D98C	cgreGFP	D95C	0.557
D98E	cgreGFP	D95E	0.033
D98G	cgreGFP	D95G	3.753
D98H	cgreGFP	D95H	0.78
D98N	cgreGFP	D95N	-0.885
D98V	cgreGFP	D95V	-2.872
D98Y	cgreGFP	D95Y	-0.153
E101A	ppluGFP	E88A	7.278
E101D	ppluGFP	E88D	13.04
E101G	ppluGFP	E88G	14.721
E101K	ppluGFP	E88K	18.297
E101V	ppluGFP	E88V	2.451
E104A	ppluGFP	E91A	1.369
E104D	ppluGFP	E91D	3.782
E104G	ppluGFP	E91G	3.696
E104K	ppluGFP	E91K	2.209
E104R	ppluGFP	E91R	3.33
E104V	ppluGFP	E91V
E114A	amacGFP	E110A	3.27
E114A	amacV14LGFP	E110A	3.754
E114A	avGFP	E110A	3.021
E114D	amacGFP	E110D	4.788
E114D	amacV14LGFP	E110D	5.062
E114G	amacGFP	E110G	7.984
E114G	amacV14LGFP	E110G	8.215
E114G	avGFP	E110G	7.618
E114K	amacGFP	E110K	1.764
E114K	amacV14LGFP	E110K	2.299
E114K	avGFP	E110K	2.157
E114M	amacGFP	E110M	1.651
E114Q	amacGFP	E110Q	-0.079
E114Q	amacV14LGFP	E110Q	0.103
E114Q	avGFP	E110Q	3.334
E114R	amacGFP	E110R	2.445
E114V	amacGFP	E110V	-0.123
E114V	amacV14LGFP	E110V	1.399
E114V	avGFP	E110V	-1.884
E114W	amacGFP	E110W	2.483
E118A	amacGFP	E114A	7.516
E118A	amacV14LGFP	E114A	6.918
E118A	avGFP	E114A	1.846
E118A	cgreGFP	E115A	3.375
E118A	ppluGFP	E105A	0.707
E118D	amacGFP	E114D	5.351
E118D	amacV14LGFP	E114D	4.274
E118D	cgreGFP	E115D	6.284
E118D	ppluGFP	E105D	-0.936
E118G	amacGFP	E114G	11.882
E118G	amacV14LGFP	E114G	11.624
E118G	avGFP	E114G	8.485
E118G	cgreGFP	E115G	7.731
E118G	ppluGFP	E105G	4.405
E118K	amacGFP	E114K	8.208
E118K	amacV14LGFP	E114K	8.312
E118K	avGFP	E114K	0.847
E118K	cgreGFP	E115K	3.786
E118K	ppluGFP	E105K	2.345
E118N	ppluGFP	E105N	0.883
E118Q	amacGFP	E114Q	3.696
E118Q	amacV14LGFP	E114Q	3.736
E118R	amacGFP	E114R	8.099
E118V	amacGFP	E114V	3.612
E118V	amacV14LGFP	E114V	3.887
E118V	avGFP	E114V	-1.043
E118V	cgreGFP	E115V	0.992
E118V	ppluGFP	E105V	-6.702
E118W	amacGFP	E114W	6.093
E118W	amacV14LGFP	E114W	5.85
E11A	cgreGFP	E11A	-0.741
E11D	cgreGFP	E11D	0.587
E11G	cgreGFP	E11G	0.863
E11K	cgreGFP	E11K	-0.993
E11V	cgreGFP	E11V	0.128
E127A	amacGFP	E123A	-0.307
E127A	amacV14LGFP	E123A	0
E127A	avGFP	E123A	0.509
E127D	amacGFP	E123D	1.786
E127D	amacV14LGFP	E123D	2.12
E127G	amacGFP	E123G	2.678
E127G	amacV14LGFP	E123G	2.538
E127G	avGFP	E123G	4.581
E127K	amacGFP	E123K	-0.678
E127K	amacV14LGFP	E123K	-0.642
E127K	avGFP	E123K	-0.206
E127Q	amacGFP	E123Q	0.254
E127Q	amacV14LGFP	E123Q	0.335
E127V	amacGFP	E123V	-0.672
E127V	amacV14LGFP	E123V	-0.246
E127V	avGFP	E123V	-2.336
E127W	amacGFP	E123W	-1.347
E127W	amacV14LGFP	E123W	-1.329
E135A	amacGFP	E131A	2.493
E135A	avGFP	E131A	1.363
E135A	ppluGFP	E122A	0.803
E135D	amacGFP	E131D	2.649
E135D	amacV14LGFP	E131D	2.132
E135D	ppluGFP	E122D	0.768
E135G	amacGFP	E131G	4.988
E135G	amacV14LGFP	E131G	4.52
E135G	avGFP	E131G	4.058
E135G	ppluGFP	E122G	2.178
E135K	amacGFP	E131K	2.215
E135K	amacV14LGFP	E131K	1.674
E135K	avGFP	E131K	1.214
E135K	ppluGFP	E122K	0.196
E135Q	amacGFP	E131Q	2.809
E135Q	ppluGFP	E122Q	1.252
E135R	ppluGFP	E122R	1.829
E135V	amacGFP	E131V	3.212
E135V	amacV14LGFP	E131V	2.77
E135V	avGFP	E131V	1.718
E135V	ppluGFP	E122V	2.288
E13A	cgreGFP	E13A	2.276
E13D	cgreGFP	E13D	5.758
E13G	cgreGFP	E13G	5.619
E13K	cgreGFP	E13K	2.772
E13V	cgreGFP	E13V	1.754
E145A	amacGFP	E141A	0.594
E145A	avGFP	E141A	-0.292
E145D	amacGFP	E141D	2.999
E145D	amacV14LGFP	E141D	3.115
E145D	avGFP	E141D	3.366
E145G	amacGFP	E141G	4.109
E145G	amacV14LGFP	E141G	4.867
E145G	avGFP	E141G	3.338
E145K	amacGFP	E141K	1.669
E145K	amacV14LGFP	E141K	1.689
E145K	avGFP	E141K	-0.768
E145Q	amacGFP	E141Q	-0.321
E145Q	amacV14LGFP	E141Q	-0.13
E145V	amacGFP	E141V	-0.578
E145V	amacV14LGFP	E141V	-0.309
E145V	avGFP	E141V	1.515
E153A	ppluGFP	E139A	1.198
E153D	ppluGFP	E139D	6.827
E153G	ppluGFP	E139G	6.488
E153K	ppluGFP	E139K	-0.348
E153Q	ppluGFP	E139Q	-2.918
E153V	ppluGFP	E139V
E167A	cgreGFP	E164A	3.29
E167D	cgreGFP	E164D	3.377
E167G	cgreGFP	E164G	5.75
E167K	cgreGFP	E164K	1.304
E167Q	cgreGFP	E164Q	3.424
E167V	cgreGFP	E164V	-0.269
E175A	amacGFP	E171A	0.107
E175A	amacV14LGFP	E171A	-0.043
E175A	avGFP	E171A	-2.741
E175D	amacGFP	E171D	1.126
E175D	amacV14LGFP	E171D	1.041
E175G	amacGFP	E171G	3.241
E175G	amacV14LGFP	E171G	3.284
E175G	avGFP	E171G	0.386
E175K	amacGFP	E171K	-1.873
E175K	amacV14LGFP	E171K	-1.608
E175K	avGFP	E171K	-0.451
E175M	amacGFP	E171M	-0.962
E175Q	amacGFP	E171Q	0.652
E175V	amacGFP	E171V	-1.214
E175V	amacV14LGFP	E171V	-0.46
E175V	avGFP	E171V	-2.005
E17A	ppluGFP	E6A	-1.036
E17D	ppluGFP	E6D	1.487
E17G	ppluGFP	E6G	5.346
E17K	ppluGFP	E6K	-0.336
E17Q	ppluGFP	E6Q	-0.952
E17V	ppluGFP	E6V	-2.621
E195A	cgreGFP	E192A	0.032
E195D	cgreGFP	E192D	-3.725
E195G	cgreGFP	E192G	1.281
E195K	cgreGFP	E192K	0.844
E195Q	cgreGFP	E192Q	0.291
E195V	cgreGFP	E192V	0.42
E196A	cgreGFP	E193A	0.631
E196D	cgreGFP	E193D	0.495
E196G	cgreGFP	E193G	-0.406
E196K	cgreGFP	E193K	-0.92
E196Q	cgreGFP	E193Q	-3.078
E196V	cgreGFP	E193V	13.441
E19A	amacGFP	E16A	2.306
E19A	amacV14LGFP	E16A	3.205
E19A	avGFP	E16A	2.371
E19D	amacGFP	E16D	3.031
E19D	amacV14LGFP	E16D	3.54
E19D	avGFP	E16D	2.212
E19D	cgreGFP	E19D	3.817
E19G	amacGFP	E16G	7.353
E19G	amacV14LGFP	E16G	7.999
E19G	avGFP	E16G	9.572
E19G	cgreGFP	E19G	10.89
E19K	amacGFP	E16K	1.805
E19K	amacV14LGFP	E16K	1.967
E19K	avGFP	E16K	4.635
E19K	cgreGFP	E19K	2.693
E19M	cgreGFP	E19M	5.321
E19Q	amacGFP	E16Q	0.594
E19Q	cgreGFP	E19Q	0.262
E19V	amacGFP	E16V	-2.78
E19V	amacV14LGFP	E16V	-2.223
E19V	avGFP	E16V	-2.601
E19V	cgreGFP	E19V	0.576
E19W	cgreGFP	E19W	2.632
E212A	ppluGFP	E197A	4.246
E212D	ppluGFP	E197D	3.882
E212G	ppluGFP	E197G	7.731
E212H	ppluGFP	E197H	3.357
E212K	ppluGFP	E197K	3.362
E212Q	ppluGFP	E197Q	1.959
E212V	ppluGFP	E197V	0.428
E213A	ppluGFP	E198A	4.572
E213D	ppluGFP	E198D	4.481
E213G	ppluGFP	E198G	10.053
E213K	ppluGFP	E198K	15.952
E213V	ppluGFP	E198V	3.759
E219A	amacGFP	E212A	4.814
E219D	amacGFP	E212D	-0.024
E219D	amacV14LGFP	E212D	10.582
E219D	avGFP	E212D	0.168
E219G	amacGFP	E212G	6.886
E219G	avGFP	E212G	8.631
E219K	amacGFP	E212K	5.059
E219K	avGFP	E212K	6.544
E219V	amacGFP	E212V	1.967
E219V	amacV14LGFP	E212V	2.238
E219V	avGFP	E212V	0.868
E21A	cgreGFP	E21A	2.366
E21D	cgreGFP	E21D	2.114
E21G	cgreGFP	E21G	6.039
E21K	cgreGFP	E21K	0.04
E21Q	cgreGFP	E21Q	0.944
E21V	cgreGFP	E21V	-2.859
E221A	cgreGFP	E215A	1.905
E221D	cgreGFP	E215D	-0.474
E221G	cgreGFP	E215G	4.04
E221K	cgreGFP	E215K	-0.448
E221Q	cgreGFP	E215Q	0.73
E221V	cgreGFP	E215V	-0.8
E224A	ppluGFP	E204A	-1.349
E224D	ppluGFP	E204D	3.64
E224G	ppluGFP	E204G	2.984
E224K	ppluGFP	E204K	0.456
E224Q	ppluGFP	E204Q	-1.449
E224V	ppluGFP	E204V	-2.919
E229A	amacGFP	E221A	2.13
E229A	amacV14LGFP	E221A	0.632
E229A	avGFP	E221A	1.761
E229A	cgreGFP	E223A	3.917
E229A	ppluGFP	E209A	-3.068
E229D	amacGFP	E221D	4.191
E229D	amacV14LGFP	E221D	6.504
E229D	avGFP	E221D	9.29
E229D	cgreGFP	E223D	11.488
E229D	ppluGFP	E209D	3.938
E229G	amacGFP	E221G	7.565
E229G	amacV14LGFP	E221G	6.905
E229G	avGFP	E221G	7.91
E229G	cgreGFP	E223G	10.732
E229G	ppluGFP	E209G	1.98
E229K	amacGFP	E221K	6.759
E229K	amacV14LGFP	E221K	7.459
E229K	cgreGFP	E223K	7.387
E229K	ppluGFP	E209K	-0.825
E229M	ppluGFP	E209M	-7.369
E229Q	amacGFP	E221Q	-2.164
E229Q	amacV14LGFP	E221Q	-1.982
E229Q	cgreGFP	E223Q	-1.05
E229Q	ppluGFP	E209Q	-4.254
E229V	amacGFP	E221V	0.495
E229V	amacV14LGFP	E221V	-1.895
E229V	cgreGFP	E223V	5.563
E229V	ppluGFP	E209V	-6.055
E229W	ppluGFP	E209W	-7.197
E239A	cgreGFP	E231A	-1.403
E239D	cgreGFP	E231D	0.458
E239G	cgreGFP	E231G	0.276
E239K	cgreGFP	E231K	-0.68
E239Q	cgreGFP	E231Q	0.211
E239R	cgreGFP	E231R	0.207
E239V	cgreGFP	E231V	-0.156
E25A	cgreGFP	E25A	4.131
E25D	cgreGFP	E25D	4.366
E25G	cgreGFP	E25G	6.17
E25K	cgreGFP	E25K	5.091
E25Q	cgreGFP	E25Q	4.867
E25V	cgreGFP	E25V	12.995
E28A	ppluGFP	E17A	0.388
E28D	ppluGFP	E17D	-0.639
E28G	ppluGFP	E17G	2.673
E28K	ppluGFP	E17K	-0.057
E28Q	ppluGFP	E17Q	0.141
E28V	ppluGFP	E17V	-0.648
E30A	ppluGFP	E19A	1.741
E30D	ppluGFP	E19D	4.385
E30G	ppluGFP	E19G	5.794
E30K	ppluGFP	E19K	3.586
E30Q	ppluGFP	E19Q	-1.051
E30V	ppluGFP	E19V	6.672
E30Y	ppluGFP	E19Y	5.107
E34A	amacGFP	E31A	4.282
E34A	amacV14LGFP	E31A	4.781
E34A	avGFP	E31A	0.355
E34A	cgreGFP	E34A	0.942
E34D	amacGFP	E31D	3.453
E34D	amacV14LGFP	E31D	2.288
E34D	avGFP	E31D	3.122
E34D	cgreGFP	E34D	1.635
E34G	amacGFP	E31G	7.634
E34G	amacV14LGFP	E31G	7.651
E34G	avGFP	E31G	3.881
E34G	cgreGFP	E34G	4.803
E34K	amacGFP	E31K	3.392
E34K	amacV14LGFP	E31K	3.316
E34K	avGFP	E31K	-0.003
E34K	cgreGFP	E34K	-0.111
E34Q	amacGFP	E31Q	3.847
E34Q	amacV14LGFP	E31Q	3.942
E34Q	cgreGFP	E34Q	-0.191
E34V	amacGFP	E31V	1.753
E34V	amacV14LGFP	E31V	1.732
E34V	avGFP	E31V	-0.35
E34V	cgreGFP	E34V	-2.683
E36A	amacGFP	E33A	0.462
E36A	amacV14LGFP	E33A	0.276
E36A	avGFP	E33A	-1.286
E36A	ppluGFP	E25A	-0.94
E36D	amacGFP	E33D	2.328
E36D	amacV14LGFP	E33D	2.12
E36D	ppluGFP	E25D	2.661
E36G	amacGFP	E33G	4.018
E36G	amacV14LGFP	E33G	3.895
E36G	avGFP	E33G	2.34
E36G	ppluGFP	E25G	2.725
E36K	amacGFP	E33K	-0.541
E36K	amacV14LGFP	E33K	-0.698
E36K	avGFP	E33K	0.501
E36K	ppluGFP	E25K	0.073
E36N	ppluGFP	E25N	0.783
E36Q	amacGFP	E33Q	-0.37
E36Q	amacV14LGFP	E33Q	-0.262
E36Q	ppluGFP	E25Q	0.61
E36V	amacGFP	E33V	-2.237
E36V	amacV14LGFP	E33V	-1.292
E36V	avGFP	E33V	5.28
E36V	ppluGFP	E25V	-0.942
E40A	ppluGFP	E29A	1.202
E40D	ppluGFP	E29D	0.774
E40G	ppluGFP	E29G	3.373
E40K	ppluGFP	E29K	1.979
E40Q	ppluGFP	E29Q	1.112
E40V	ppluGFP	E29V	2.675
E40Y	ppluGFP	E29Y	2.185
E45A	amacGFP	E42A	1.351
E45D	amacGFP	E42D	-0.204
E45D	amacV14LGFP	E42D	0.065
E45G	amacGFP	E42G	7.555
E45G	amacV14LGFP	E42G	7.46
E45K	amacGFP	E42K	0.607
E45K	amacV14LGFP	E42K	0.388
E45Q	amacGFP	E42Q	-0.394
E45Q	amacV14LGFP	E42Q	-0.391
E45V	amacGFP	E42V	-1.275
E45V	amacV14LGFP	E42V	-1.572
E5A	cgreGFP	E5A	0.62
E5D	cgreGFP	E5D	-1.218
E5G	cgreGFP	E5G	2.638
E5K	cgreGFP	E5K	0.783
E5Q	cgreGFP	E5Q	0.791
E5V	cgreGFP	E5V	0.731
E78A	amacGFP	E75A	0.842
E78D	amacGFP	E75D	-1.766
E78D	amacV14LGFP	E75D	-1.804
E78G	amacGFP	E75G	2.982
E78G	amacV14LGFP	E75G	2.212
E78K	amacGFP	E75K	0.105
E78K	amacV14LGFP	E75K	0.2
E78Q	amacGFP	E75Q	-0.759
E78Q	amacV14LGFP	E75Q	-0.676
E78V	amacGFP	E75V	1.877
E78V	amacV14LGFP	E75V	1.928
E7A	amacGFP	E4A	7.473
E7A	amacV14LGFP	E4A	6.109
E7A	avGFP	E4A	-1.837
E7D	amacGFP	E4D	7.91
E7D	amacV14LGFP	E4D	8.194
E7D	avGFP	E4D	-1.633
E7G	amacGFP	E4G	10.014
E7G	amacV14LGFP	E4G	9.544
E7G	avGFP	E4G	2.311
E7K	amacGFP	E4K	18.445
E7K	amacV14LGFP	E4K	18.752
E7K	avGFP	E4K	-0.042
E7Q	amacGFP	E4Q	1.649
E7Q	amacV14LGFP	E4Q	1.81
E7R	avGFP	E4R	0.49
E7V	amacGFP	E4V	6.012
E7V	amacV14LGFP	E4V	5.846
E7V	avGFP	E4V	-1.05
E7Y	amacGFP	E4Y	6.147
E81A	ppluGFP	E70A	0.852
E81D	ppluGFP	E70D	1.333
E81G	ppluGFP	E70G	3.021
E81K	ppluGFP	E70K	-0.462
E81V	ppluGFP	E70V	-0.757
E8A	amacGFP	E5A	-0.699
E8A	amacV14LGFP	E5A	-0.522
E8D	amacGFP	E5D	2.055
E8D	amacV14LGFP	E5D	2.151
E8G	amacGFP	E5G	2.612
E8G	amacV14LGFP	E5G	2.667
E8G	avGFP	E5G	0.761
E8K	amacGFP	E5K	-0.315
E8K	amacV14LGFP	E5K	-0.509
E8K	avGFP	E5K	-0.997
E8Q	amacGFP	E5Q	0.187
E8Q	amacV14LGFP	E5Q	-0.011
E8R	avGFP	E5R	0.125
E8V	amacGFP	E5V	2.585
E8V	amacV14LGFP	E5V	2.577
E8V	avGFP	E5V	0.53
E93A	amacGFP	E89A	-0.313
E93A	amacV14LGFP	E89A	-0.41
E93A	avGFP	E89A	3.306
E93D	amacGFP	E89D	-1.495
E93D	amacV14LGFP	E89D	-1.53
E93D	avGFP	E89D	2.769
E93G	amacGFP	E89G	2.86
E93G	amacV14LGFP	E89G	2.716
E93G	avGFP	E89G	6.739
E93K	amacGFP	E89K	2.488
E93K	amacV14LGFP	E89K	2.33
E93K	avGFP	E89K	5.866
E93L	amacGFP	E89L	0.43
E93Q	amacGFP	E89Q	-2.435
E93Q	amacV14LGFP	E89Q	-2.802
E93V	amacGFP	E89V	6.939
E93V	amacV14LGFP	E89V	6.62
E93V	avGFP	E89V	5.448
E98A	amacGFP	E94A	-0.202
E98A	amacV14LGFP	E94A	0.095
E98A	avGFP	E94A	1.21
E98D	amacGFP	E94D	5.307
E98D	amacV14LGFP	E94D	5.385
E98D	avGFP	E94D	3.22
E98G	amacGFP	E94G	4.273
E98G	amacV14LGFP	E94G	4.384
E98G	avGFP	E94G	4.967
E98K	amacGFP	E94K	0.675
E98K	amacV14LGFP	E94K	0.85
E98K	avGFP	E94K	0.944
E98Q	amacGFP	E94Q	-0.258
E98Q	amacV14LGFP	E94Q	-0.338
E98Q	avGFP	E94Q	-0.061
E98V	amacGFP	E94V	-2.841
E98V	amacV14LGFP	E94V	-3.117
E98V	avGFP	E94V	-3.259
F102C	amacGFP	F98C	4.648
F102C	avGFP	F98C	5.955
F102I	amacGFP	F98I	-0.385
F102I	amacV14LGFP	F98I	0.301
F102I	avGFP	F98I	-0.046
F102L	amacGFP	F98L	0.024
F102L	amacV14LGFP	F98L	0.135
F102L	avGFP	F98L	0.18
F102S	amacGFP	F98S	4.501
F102S	amacV14LGFP	F98S	4.672
F102S	avGFP	F98S	3.895
F102V	amacGFP	F98V	0.281
F102V	avGFP	F98V	-0.02
F102Y	amacGFP	F98Y	-0.351
F102Y	amacV14LGFP	F98Y	0.214
F102Y	avGFP	F98Y	-0.065
F103C	amacGFP	F99C	14.03
F103C	avGFP	F99C	8.962
F103C	cgreGFP	F100C	13.217
F103I	amacGFP	F99I	8.64
F103I	avGFP	F99I	6.281
F103I	cgreGFP	F100I	7.911
F103L	amacGFP	F99L	10.909
F103L	avGFP	F99L	7.712
F103L	cgreGFP	F100L	8.626
F103S	amacGFP	F99S	17.711
F103S	avGFP	F99S	13.009
F103S	cgreGFP	F100S	19.561
F103V	amacGFP	F99V	10.194
F103V	cgreGFP	F100V	9.434
F103Y	amacGFP	F99Y	2.299
F103Y	amacV14LGFP	F99Y	2.343
F103Y	avGFP	F99Y	0.539
F103Y	cgreGFP	F100Y	2.96
F10C	amacGFP	F7C	11.977
F10C	avGFP	F7C	13.552
F10C	cgreGFP	F10C	12.063
F10H	avGFP	F7H	8.219
F10I	amacGFP	F7I	13.649
F10I	amacV14LGFP	F7I	13.337
F10I	avGFP	F7I	24.58
F10I	cgreGFP	F10I	14.786
F10L	amacGFP	F7L	7.153
F10L	amacV14LGFP	F7L	9.752
F10L	avGFP	F7L	7.485
F10L	cgreGFP	F10L	10.333
F10P	amacGFP	F7P	20.968
F10S	amacGFP	F7S	11.601
F10S	amacV14LGFP	F7S	13.119
F10S	avGFP	F7S	16.914
F10S	cgreGFP	F10S	15.206
F10T	cgreGFP	F10T	10.286
F10V	amacGFP	F7V	12.137
F10V	amacV14LGFP	F7V	11.118
F10V	avGFP	F7V	10.92
F10V	cgreGFP	F10V	13.313
F10Y	amacGFP	F7Y	3.902
F10Y	amacV14LGFP	F7Y	3.324
F10Y	avGFP	F7Y	1.819
F10Y	cgreGFP	F10Y	1.86
F113C	ppluGFP	F100C	7.969
F113I	ppluGFP	F100I	5.045
F113L	ppluGFP	F100L	2.181
F113S	ppluGFP	F100S	11.546
F113V	ppluGFP	F100V	4.897
F113Y	ppluGFP	F100Y	7.32
F117C	amacGFP	F113C	10.669
F117C	amacV14LGFP	F113C	8.756
F117C	avGFP	F113C	10.875
F117I	amacGFP	F113I	6.775
F117I	amacV14LGFP	F113I	3.925
F117I	avGFP	F113I	5.901
F117L	amacGFP	F113L	7.326
F117L	amacV14LGFP	F113L	5.153
F117L	avGFP	F113L	6.665
F117S	amacGFP	F113S	14.393
F117S	amacV14LGFP	F113S	12.878
F117S	avGFP	F113S	14.919
F117V	amacGFP	F113V	6.629
F117Y	amacGFP	F113Y	0.786
F117Y	amacV14LGFP	F113Y	1.296
F117Y	avGFP	F113Y	2.353
F126C	ppluGFP	F113C	11.035
F126I	ppluGFP	F113I	4.855
F126L	ppluGFP	F113L	6.4
F126S	ppluGFP	F113S	13.298
F126V	ppluGFP	F113V	6.623
F126Y	ppluGFP	F113Y	10.232
F133C	amacGFP	F129C	11.52
F133C	amacV14LGFP	F129C	11.663
F133C	avGFP	F129C	7.145
F133C	cgreGFP	F130C	12.186
F133C	ppluGFP	F120C	11.275
F133I	amacGFP	F129I	7.218
F133I	amacV14LGFP	F129I	7.527
F133I	avGFP	F129I	0.633
F133I	cgreGFP	F130I	7.785
F133I	ppluGFP	F120I	7.235
F133L	amacGFP	F129L	7.944
F133L	amacV14LGFP	F129L	8.564
F133L	avGFP	F129L	3.327
F133L	cgreGFP	F130L	6.368
F133L	ppluGFP	F120L	11.005
F133S	amacGFP	F129S	15.844
F133S	avGFP	F129S	11.823
F133S	cgreGFP	F130S	15.001
F133S	ppluGFP	F120S	15.058
F133V	amacGFP	F129V	7.692
F133V	avGFP	F129V	1.462
F133V	cgreGFP	F130V	9.404
F133V	ppluGFP	F120V	5.344
F133Y	amacGFP	F129Y	4.179
F133Y	avGFP	F129Y	4.141
F133Y	cgreGFP	F130Y	5.009
F133Y	ppluGFP	F120Y	6.162
F140C	ppluGFP	F127C	11.33
F140I	ppluGFP	F127I	12.718
F140L	ppluGFP	F127L	5.46
F140N	ppluGFP	F127N	8.51
F140S	ppluGFP	F127S	11.921
F140V	ppluGFP	F127V	8.951
F140Y	ppluGFP	F127Y	1.375
F148C	amacGFP	F144C	8.119
F148C	amacV14LGFP	F144C	8.127
F148I	amacGFP	F144I	4.056
F148I	amacV14LGFP	F144I	3.781
F148L	amacGFP	F144L	3.533
F148L	amacV14LGFP	F144L	3.428
F148S	amacGFP	F144S	9.54
F148S	amacV14LGFP	F144S	8.583
F148V	amacGFP	F144V	6.953
F148Y	amacGFP	F144Y	2.361
F148Y	amacV14LGFP	F144Y	2.298
F168C	amacGFP	F164C	12.411
F168C	amacV14LGFP	F164C	12.454
F168C	avGFP	F164C	10.425
F168C	ppluGFP	F153C	8.855
F168H	avGFP	F164H	8.322
F168I	amacGFP	F164I	16.08
F168I	amacV14LGFP	F164I	11.872
F168I	avGFP	F164I	13.254
F168I	ppluGFP	F153I	11.694
F168L	amacGFP	F164L	8.497
F168L	amacV14LGFP	F164L	8.609
F168L	avGFP	F164L	4.59
F168L	ppluGFP	F153L	3.405
F168S	amacGFP	F164S	14.247
F168S	amacV14LGFP	F164S	14.552
F168S	avGFP	F164S	12.063
F168S	ppluGFP	F153S	9.786
F168V	amacGFP	F164V	11.434
F168V	avGFP	F164V	6.693
F168V	ppluGFP	F153V	7.767
F168Y	amacGFP	F164Y	2.527
F168Y	amacV14LGFP	F164Y	2.522
F168Y	avGFP	F164Y	1.445
F168Y	ppluGFP	F153Y	0.697
F172C	cgreGFP	F169C	7.124
F172C	ppluGFP	F157C	10.582
F172I	cgreGFP	F169I	3.792
F172I	ppluGFP	F157I	13.998
F172L	cgreGFP	F169L	1.655
F172L	ppluGFP	F157L	5.784
F172S	cgreGFP	F169S	12.105
F172S	ppluGFP	F157S	12.572
F172V	cgreGFP	F169V	5.934
F172V	ppluGFP	F157V	7.073
F172Y	cgreGFP	F169Y	-0.117
F172Y	ppluGFP	F157Y	1.32
F182C	ppluGFP	F167C	6.889
F182I	ppluGFP	F167I	7.892
F182L	ppluGFP	F167L	3.004
F182S	ppluGFP	F167S	8.422
F182V	ppluGFP	F167V	4.018
F182Y	ppluGFP	F167Y	2.676
F187C	cgreGFP	F184C	6.26
F187I	cgreGFP	F184I	3.258
F187L	cgreGFP	F184L	4.268
F187S	cgreGFP	F184S	4.77
F187V	cgreGFP	F184V	2.562
F187Y	cgreGFP	F184Y	0.947
F190C	ppluGFP	F175C	4.102
F190I	ppluGFP	F175I	21.604
F190L	ppluGFP	F175L
F190S	ppluGFP	F175S	7.436
F190V	ppluGFP	F175V	11.76
F190Y	ppluGFP	F175Y	0.012
F206C	ppluGFP	F191C	6.86
F206D	ppluGFP	F191D	6.7
F206I	ppluGFP	F191I	6.557
F206L	ppluGFP	F191L	3.147
F206S	ppluGFP	F191S	8.112
F206V	ppluGFP	F191V	8.449
F206Y	ppluGFP	F191Y	0.845
F208C	ppluGFP	F193C	3.971
F208I	ppluGFP	F193I	2.528
F208L	ppluGFP	F193L	0.541
F208S	ppluGFP	F193S	4.129
F208V	ppluGFP	F193V
F208Y	ppluGFP	F193Y	0.07
F213C	cgreGFP	F207C	5.939
F213I	cgreGFP	F207I	5.792
F213L	cgreGFP	F207L	0.96
F213S	cgreGFP	F207S	7.166
F213V	cgreGFP	F207V	5.742
F213Y	cgreGFP	F207Y	3.624
F227C	amacGFP	F219C	5.237
F227C	amacV14LGFP	F219C	6.622
F227I	amacGFP	F219I	10.26
F227I	amacV14LGFP	F219I	9.969
F227L	amacGFP	F219L	-2.499
F227L	amacV14LGFP	F219L	-2.666
F227S	amacGFP	F219S	7.399
F227V	amacGFP	F219V	2.119
F227Y	amacGFP	F219Y	-1.567
F227Y	amacV14LGFP	F219Y	-1.329
F230C	amacGFP	F222C	5.689
F230I	amacGFP	F222I	0.106
F230I	amacV14LGFP	F222I	0.284
F230I	avGFP	F222I	2.42
F230L	amacGFP	F222L	3.238
F230L	amacV14LGFP	F222L	3.38
F230L	avGFP	F222L	1.125
F230S	amacGFP	F222S	3.872
F230S	amacV14LGFP	F222S	3.907
F230S	avGFP	F222S	5.118
F230V	avGFP	F222V	2.167
F230Y	amacGFP	F222Y	-1.154
F230Y	amacV14LGFP	F222Y	0.228
F230Y	avGFP	F222Y	1.738
F231C	amacGFP	F223C	5.408
F231C	amacV14LGFP	F223C	5.324
F231I	amacGFP	F223I	3.528
F231I	amacV14LGFP	F223I	3.276
F231L	amacGFP	F223L	1.723
F231L	amacV14LGFP	F223L	1.782
F231S	amacGFP	F223S	9.138
F231S	amacV14LGFP	F223S	9.978
F231V	amacGFP	F223V	3.041
F231V	amacV14LGFP	F223V	2.847
F231Y	amacGFP	F223Y	6.723
F231Y	amacV14LGFP	F223Y	6.71
F234C	ppluGFP	F214C	8.708
F234I	ppluGFP	F214I
F234L	ppluGFP	F214L	7.918
F234N	ppluGFP	F214N	13.148
F234S	ppluGFP	F214S	10.985
F234V	ppluGFP	F214V	5.754
F234Y	ppluGFP	F214Y	1.583
F29C	amacGFP	F26C	15.415
F29C	cgreGFP	F29C	14.274
F29C	ppluGFP	F18C	12.141
F29I	amacGFP	F26I	23.832
F29I	amacV14LGFP	F26I	28.402
F29I	avGFP	F26I	13.216
F29I	cgreGFP	F29I	22.315
F29I	ppluGFP	F18I	9.235
F29L	amacGFP	F26L	9.431
F29L	amacV14LGFP	F26L	9.754
F29L	avGFP	F26L	7.552
F29L	cgreGFP	F29L	11.892
F29L	ppluGFP	F18L	8.224
F29S	amacGFP	F26S	18.209
F29S	avGFP	F26S	16.4
F29S	cgreGFP	F29S	16.843
F29S	ppluGFP	F18S	12.992
F29V	amacGFP	F26V	16.281
F29V	amacV14LGFP	F26V	16.008
F29V	avGFP	F26V	13.611
F29V	cgreGFP	F29V	14.751
F29V	ppluGFP	F18V	8.849
F29Y	amacGFP	F26Y	1.242
F29Y	cgreGFP	F29Y	1.838
F29Y	ppluGFP	F18Y
F48C	amacGFP	F45C	13.601
F48C	amacV14LGFP	F45C	12.961
F48C	avGFP	F45C	10.972
F48I	amacGFP	F45I	9.753
F48I	amacV14LGFP	F45I	9.082
F48I	avGFP	F45I	11.016
F48L	amacGFP	F45L	9.364
F48L	amacV14LGFP	F45L	9.627
F48L	avGFP	F45L	9.844
F48S	amacGFP	F45S	17.35
F48S	avGFP	F45S	13.758
F48V	amacGFP	F45V	9.532
F48V	amacV14LGFP	F45V	9.471
F48V	avGFP	F45V	10.856
F48Y	amacGFP	F45Y	2.248
F48Y	amacV14LGFP	F45Y	1.85
F48Y	avGFP	F45Y	3.559
F57C	ppluGFP	F46C	13.002
F57I	ppluGFP	F46I	10.836
F57L	ppluGFP	F46L	8.99
F57S	ppluGFP	F46S	14.361
F57V	ppluGFP	F46V	11.942
F57Y	ppluGFP	F46Y	2.639
F70C	ppluGFP	F59C
F70I	ppluGFP	F59I
F70L	ppluGFP	F59L
F70S	ppluGFP	F59S
F70V	ppluGFP	F59V
F70Y	ppluGFP	F59Y
F71A	cgreGFP	F71A	12.542
F71C	cgreGFP	F71C	12.225
F71I	cgreGFP	F71I	9.412
F71L	cgreGFP	F71L	4.564
F71M	cgreGFP	F71M	5.852
F71S	cgreGFP	F71S	14.212
F71V	cgreGFP	F71V	11.592
F71Y	cgreGFP	F71Y	1.341
F73C	amacGFP	F70C	12.335
F73C	amacV14LGFP	F70C	10.95
F73C	avGFP	F70C	9.683
F73C	cgreGFP	F73C	10.968
F73C	ppluGFP	F62C	13.385
F73I	amacGFP	F70I	12.715
F73I	amacV14LGFP	F70I	9.965
F73I	avGFP	F70I	4.207
F73I	cgreGFP	F73I	11.411
F73I	ppluGFP	F62I	11.831
F73L	amacGFP	F70L	9.122
F73L	amacV14LGFP	F70L	10.665
F73L	avGFP	F70L	4.394
F73L	cgreGFP	F73L	7.986
F73L	ppluGFP	F62L	16.545
F73S	amacGFP	F70S	15.338
F73S	amacV14LGFP	F70S	12.129
F73S	avGFP	F70S	13.873
F73S	cgreGFP	F73S	13.392
F73S	ppluGFP	F62S	17.296
F73T	amacGFP	F70T	11.796
F73V	amacGFP	F70V	11.329
F73V	amacV14LGFP	F70V	8.868
F73V	ppluGFP	F62V	9.813
F73Y	amacGFP	F70Y	1.271
F73Y	avGFP	F70Y	3.084
F73Y	cgreGFP	F73Y	1.931
F73Y	ppluGFP	F62Y	2.23
F85C	cgreGFP	F83C	12.607
F85I	amacGFP	F82I	23.82
F85I	avGFP	F82I	35.645
F85I	cgreGFP	F83I	12.093
F85L	amacGFP	F82L	15.597
F85L	avGFP	F82L	17.454
F85L	cgreGFP	F83L	13.888
F85S	amacGFP	F82S	16.529
F85S	avGFP	F82S	20.838
F85S	cgreGFP	F83S	14.452
F85T	cgreGFP	F83T	10.409
F85Y	amacGFP	F82Y	2.345
F85Y	amacV14LGFP	F82Y	2.162
F85Y	avGFP	F82Y	2.363
F85Y	cgreGFP	F83Y	1.891
F86C	amacGFP	F83C	11.108
F86C	amacV14LGFP	F83C	11.029
F86C	avGFP	F83C	11.069
F86C	cgreGFP	F84C	10.618
F86C	ppluGFP	F73C	11.064
F86I	amacGFP	F83I	14.481
F86I	cgreGFP	F84I	14.215
F86I	ppluGFP	F73I	23.793
F86L	amacGFP	F83L	6.027
F86L	amacV14LGFP	F83L	6.089
F86L	avGFP	F83L	6.244
F86L	cgreGFP	F84L	12.196
F86L	ppluGFP	F73L	8.606
F86P	ppluGFP	F73P	33.501
F86S	amacGFP	F83S	13.675
F86S	amacV14LGFP	F83S	13.614
F86S	avGFP	F83S	13.53
F86S	cgreGFP	F84S	11.996
F86S	ppluGFP	F73S	11.849
F86T	cgreGFP	F84T	9.774
F86T	ppluGFP	F73T	8.106
F86V	cgreGFP	F84V	9.434
F86V	ppluGFP	F73V	12.226
F86Y	amacGFP	F83Y	0.312
F86Y	amacV14LGFP	F83Y	0.352
F86Y	avGFP	F83Y	1.12
F86Y	cgreGFP	F84Y	1.963
F86Y	ppluGFP	F73Y	2.841
G106A	ppluGFP	G93A	7.774
G106C	ppluGFP	G93C	9.416
G106D	ppluGFP	G93D	6.801
G106R	ppluGFP	G93R	8.316
G106S	ppluGFP	G93S	5.909
G106V	ppluGFP	G93V	21.437
G107A	amacGFP	G103A	28.444
G107A	avGFP	G103A	14.369
G107A	cgreGFP	G104A	27.971
G107A	ppluGFP	G94A	3.959
G107C	amacGFP	G103C	28.526
G107C	cgreGFP	G104C	28.179
G107D	amacGFP	G103D	49.016
G107D	cgreGFP	G104D	47.41
G107D	ppluGFP	G94D	21.169
G107R	cgreGFP	G104R	59.422
G107S	amacGFP	G103S	34.805
G107S	avGFP	G103S	22.648
G107S	cgreGFP	G104S	31.747
G107S	ppluGFP	G94S
G107V	amacGFP	G103V	46.409
G107V	cgreGFP	G104V	39.646
G107V	ppluGFP	G94V	25.721
G113A	amacGFP	G109A	5.861
G113A	amacV14LGFP	G109A	5.631
G113D	amacGFP	G109D	14.811
G113E	amacGFP	G109E	21.165
G113E	amacV14LGFP	G109E	20.321
G113V	amacGFP	G109V	8.456
G113W	amacGFP	G109W	14.626
G119A	amacGFP	G115A	3.916
G119A	amacV14LGFP	G115A	3.98
G119A	avGFP	G115A	3.806
G119C	amacGFP	G115C	13.705
G119C	amacV14LGFP	G115C	13.619
G119C	avGFP	G115C	13.598
G119D	amacGFP	G115D	2.378
G119D	amacV14LGFP	G115D	2.195
G119D	avGFP	G115D	2.133
G119R	amacGFP	G115R	13.054
G119R	amacV14LGFP	G115R	12.923
G119S	amacGFP	G115S	3.567
G119S	amacV14LGFP	G115S	3.534
G119V	amacGFP	G115V	17.027
G119V	amacV14LGFP	G115V	17.225
G120A	cgreGFP	G117A	4.227
G120A	ppluGFP	G107A	1.673
G120C	cgreGFP	G117C	6.123
G120C	ppluGFP	G107C	-1.81
G120D	cgreGFP	G117D	3.154
G120D	ppluGFP	G107D	5.675
G120R	cgreGFP	G117R	5.527
G120R	ppluGFP	G107R	11.733
G120S	cgreGFP	G117S	4.62
G120S	ppluGFP	G107S	12.594
G120V	cgreGFP	G117V	16.703
G120V	ppluGFP	G107V	-2.415
G124A	ppluGFP	G111A	-2.222
G124C	ppluGFP	G111C	12.502
G124D	ppluGFP	G111D	36.849
G124R	ppluGFP	G111R	43.597
G124S	ppluGFP	G111S	6.034
G124V	ppluGFP	G111V	10.819
G12A	amacGFP	G9A	3.641
G12E	amacGFP	G9E	11.188
G12E	amacV14LGFP	G9E	11.191
G12E	avGFP	G9E	1.635
G12K	amacGFP	G9K	2.749
G12K	amacV14LGFP	G9K	2.633
G12R	amacGFP	G9R	12.973
G12R	amacV14LGFP	G9R	13.05
G12R	avGFP	G9R	0.973
G12V	amacGFP	G9V	19.64
G12V	amacV14LGFP	G9V	19.622
G12V	avGFP	G9V	-0.099
G12W	amacGFP	G9W	13.502
G12W	amacV14LGFP	G9W	13.742
G12W	avGFP	G9W	-0.993
G130A	amacGFP	G126A	9.642
G130A	amacV14LGFP	G126A	10.305
G130A	cgreGFP	G127A	5.768
G130A	ppluGFP	G117A	-1.993
G130C	amacGFP	G126C	17.389
G130C	amacV14LGFP	G126C	17.817
G130C	avGFP	G126C	20.46
G130C	cgreGFP	G127C	12.699
G130C	ppluGFP	G117C	3.116
G130D	amacGFP	G126D	24.411
G130D	avGFP	G126D	20.759
G130D	cgreGFP	G127D	18.148
G130D	ppluGFP	G117D	8.432
G130R	cgreGFP	G127R	37.558
G130R	ppluGFP	G117R	10.643
G130S	amacGFP	G126S	17.291
G130S	avGFP	G126S	19.893
G130S	cgreGFP	G127S	11.601
G130S	ppluGFP	G117S	4.118
G130V	amacGFP	G126V	16.825
G130V	cgreGFP	G127V	13.954
G130V	ppluGFP	G117V	13.963
G132A	cgreGFP	G129A	2.805
G132A	ppluGFP	G119A	1.373
G132C	cgreGFP	G129C	4.841
G132C	ppluGFP	G119C	3.827
G132D	cgreGFP	G129D	-0.871
G132D	ppluGFP	G119D	-1.947
G132R	cgreGFP	G129R	3.073
G132R	ppluGFP	G119R	1.593
G132S	ppluGFP	G119S	1.044
G132V	cgreGFP	G129V	15.303
G132V	ppluGFP	G119V	13.549
G132Y	ppluGFP	G119Y	1.221
G137A	amacGFP	G133A	7.252
G137A	amacV14LGFP	G133A	7.363
G137A	cgreGFP	G134A	2.119
G137C	amacGFP	G133C	7.692
G137C	amacV14LGFP	G133C	7.547
G137C	avGFP	G133C	5.185
G137C	cgreGFP	G134C	2.794
G137D	amacGFP	G133D	13.296
G137D	amacV14LGFP	G133D	13.416
G137D	avGFP	G133D	5.404
G137D	cgreGFP	G134D	9.308
G137R	amacGFP	G133R	13.872
G137R	amacV14LGFP	G133R	13.911
G137R	avGFP	G133R	3.909
G137S	amacGFP	G133S	9.51
G137S	amacV14LGFP	G133S	8.864
G137S	avGFP	G133S	-0.53
G137S	cgreGFP	G134S	4.163
G137V	amacGFP	G133V	20.123
G137V	cgreGFP	G134V	11.85
G141A	amacGFP	G137A	-1.623
G141A	amacV14LGFP	G137A	-0.395
G141A	avGFP	G137A	0.142
G141A	cgreGFP	G138A	-1.699
G141E	amacGFP	G137E	7.302
G141E	amacV14LGFP	G137E	7.772
G141E	avGFP	G137E	7.762
G141E	cgreGFP	G138E	3.129
G141L	amacGFP	G137L	3.925
G141R	amacGFP	G137R	3.512
G141R	amacV14LGFP	G137R	4.219
G141R	avGFP	G137R	3.479
G141R	cgreGFP	G138R	-0.124
G141T	amacGFP	G137T	6.308
G141V	amacGFP	G137V	7.48
G141V	amacV14LGFP	G137V	8.024
G141V	avGFP	G137V	9.955
G141V	cgreGFP	G138V	3.35
G141W	amacGFP	G137W	11.309
G141W	amacV14LGFP	G137W	12.148
G141W	avGFP	G137W	17.222
G141W	cgreGFP	G138W	2.679
G160A	ppluGFP	G145A	-1.897
G160C	ppluGFP	G145C	-0.122
G160D	ppluGFP	G145D	-2.64
G160R	ppluGFP	G145R	-0.078
G160S	ppluGFP	G145S	-2.131
G160V	ppluGFP	G145V
G162A	cgreGFP	G159A	0.964
G162C	cgreGFP	G159C	3.144
G162D	cgreGFP	G159D	0.471
G162R	cgreGFP	G159R	1.698
G162S	cgreGFP	G159S	1.121
G162V	cgreGFP	G159V	12.853
G163A	amacGFP	G159A	5.936
G163A	cgreGFP	G160A	6.897
G163C	amacGFP	G159C	14.43
G163C	amacV14LGFP	G159C	14.49
G163C	avGFP	G159C	13.395
G163C	cgreGFP	G160C	3.234
G163D	amacGFP	G159D	27.071
G163D	avGFP	G159D	22.479
G163D	cgreGFP	G160D	11.09
G163R	amacGFP	G159R	16.083
G163R	amacV14LGFP	G159R	16.46
G163R	avGFP	G159R	18.907
G163R	cgreGFP	G160R	0.82
G163S	amacGFP	G159S	12.703
G163S	amacV14LGFP	G159S	12.597
G163S	avGFP	G159S	14.206
G163S	cgreGFP	G160S	15.344
G163V	amacGFP	G159V	24.538
G163V	amacV14LGFP	G159V	24.565
G163V	avGFP	G159V	23.921
G163V	cgreGFP	G160V	14.237
G166A	ppluGFP	G151A	-2.66
G166C	ppluGFP	G151C	-1.105
G166D	ppluGFP	G151D	5.271
G166R	ppluGFP	G151R	6.867
G166S	ppluGFP	G151S	-2.924
G166V	ppluGFP	G151V	-0.211
G176A	amacGFP	G172A	5.72
G176A	cgreGFP	G173A	5.675
G176C	amacGFP	G172C	6.957
G176C	amacV14LGFP	G172C	6.971
G176C	cgreGFP	G173C	7.605
G176D	amacGFP	G172D	4.445
G176D	amacV14LGFP	G172D	4.434
G176D	cgreGFP	G173D	3.809
G176R	amacGFP	G172R	4.008
G176R	cgreGFP	G173R	6.475
G176S	amacGFP	G172S	3.788
G176S	amacV14LGFP	G172S	3.814
G176S	cgreGFP	G173S	4.928
G176V	amacGFP	G172V	18.184
G176V	amacV14LGFP	G172V	18.081
G176V	cgreGFP	G173V	17.721
G177A	amacGFP	G173A	14.466
G177A	cgreGFP	G174A	19.823
G177A	ppluGFP	G162A	5.267
G177C	amacGFP	G173C	17.416
G177C	amacV14LGFP	G173C	17.28
G177C	avGFP	G173C	9.23
G177C	cgreGFP	G174C	17.557
G177C	ppluGFP	G162C	6.862
G177D	amacGFP	G173D	12.137
G177D	amacV14LGFP	G173D	12.098
G177D	avGFP	G173D	7.893
G177D	cgreGFP	G174D	10.034
G177D	ppluGFP	G162D	4.336
G177I	cgreGFP	G174I	18.881
G177R	amacGFP	G173R	17.058
G177R	amacV14LGFP	G173R	17.08
G177R	cgreGFP	G174R	16.647
G177R	ppluGFP	G162R	4.92
G177S	amacGFP	G173S	4.99
G177S	amacV14LGFP	G173S	5.013
G177S	avGFP	G173S	5.424
G177S	cgreGFP	G174S	7.187
G177S	ppluGFP	G162S	3.935
G177V	amacGFP	G173V	19.043
G177V	amacV14LGFP	G173V	19.036
G177V	cgreGFP	G174V	19.442
G177V	ppluGFP	G162V	19.44
G178A	amacGFP	G174A	15.664
G178A	amacV14LGFP	G174A	15.737
G178A	cgreGFP	G175A	9.419
G178A	ppluGFP	G163A	1.305
G178C	cgreGFP	G175C	16.614
G178C	ppluGFP	G163C	2.259
G178D	amacGFP	G174D	14.365
G178D	cgreGFP	G175D	9.162
G178D	ppluGFP	G163D	4.816
G178E	amacGFP	G174E	15.773
G178E	amacV14LGFP	G174E	15.678
G178L	amacGFP	G174L	15.434
G178R	amacGFP	G174R	16.142
G178R	amacV14LGFP	G174R	16.622
G178R	ppluGFP	G163R	1.652
G178S	cgreGFP	G175S	5.432
G178S	ppluGFP	G163S	0.296
G178V	amacGFP	G174V	18.354
G178V	amacV14LGFP	G174V	18.81
G178V	cgreGFP	G175V	21.173
G178V	ppluGFP	G163V	2.298
G178W	amacGFP	G174W	17.337
G178W	amacV14LGFP	G174W	17.891
G192A	amacGFP	G188A	1.314
G192A	amacV14LGFP	G188A	1.339
G192A	avGFP	G188A	8.759
G192A	cgreGFP	G189A	12.677
G192C	amacGFP	G188C	0.515
G192C	amacV14LGFP	G188C	0.515
G192C	avGFP	G188C	10.344
G192C	cgreGFP	G189C	17.685
G192D	amacGFP	G188D	7.021
G192D	amacV14LGFP	G188D	6.212
G192D	avGFP	G188D	9.39
G192D	cgreGFP	G189D	13.569
G192N	amacGFP	G188N	1.916
G192N	amacV14LGFP	G188N	1.865
G192R	amacGFP	G188R	2.502
G192R	amacV14LGFP	G188R	3.017
G192R	cgreGFP	G189R	16.575
G192S	amacGFP	G188S	2.721
G192S	amacV14LGFP	G188S	1.979
G192S	avGFP	G188S	6.522
G192S	cgreGFP	G189S	6.346
G192V	amacGFP	G188V	1.281
G192V	amacV14LGFP	G188V	1.208
G192V	cgreGFP	G189V	11.254
G194A	amacGFP	G190A	-0.694
G194A	amacV14LGFP	G190A	-0.685
G194A	avGFP	G190A	-0.413
G194C	amacGFP	G190C	0.249
G194C	amacV14LGFP	G190C	0.043
G194C	avGFP	G190C	-1.027
G194D	amacGFP	G190D	-1.247
G194D	amacV14LGFP	G190D	-1.253
G194D	avGFP	G190D	0.479
G194R	amacGFP	G190R	-0.281
G194R	amacV14LGFP	G190R	-0.325
G194S	amacGFP	G190S	-1.057
G194S	amacV14LGFP	G190S	-0.986
G194S	avGFP	G190S	-0.163
G194V	amacGFP	G190V	-2.222
G194V	amacV14LGFP	G190V	-2.318
G194V	avGFP	G190V	-3.164
G202A	ppluGFP	G187A	10.945
G202C	ppluGFP	G187C
G202D	ppluGFP	G187D	6.573
G202R	ppluGFP	G187R	18.614
G202S	ppluGFP	G187S	9.339
G202V	ppluGFP	G187V	23.428
G203A	ppluGFP	G188A	4.471
G203C	ppluGFP	G188C	4.283
G203D	ppluGFP	G188D	8.205
G203R	ppluGFP	G188R	3.234
G203S	ppluGFP	G188S	3.731
G203V	ppluGFP	G188V	-0.298
G214A	cgreGFP	G208A	0.455
G214C	cgreGFP	G208C	3.161
G214D	cgreGFP	G208D	0.201
G214R	cgreGFP	G208R	4.2
G214S	cgreGFP	G208S	-0.921
G214V	cgreGFP	G208V	7.37
G226A	ppluGFP	G206A	-5.22
G226E	ppluGFP	G206E	-3.438
G226R	ppluGFP	G206R	-4.401
G226V	ppluGFP	G206V	-0.937
G226W	ppluGFP	G206W	-4.136
G22A	amacGFP	G19A	-3.032
G22A	amacV14LGFP	G19A	-3.334
G22A	cgreGFP	G22A	-2.802
G22A	ppluGFP	G11A	3.476
G22C	amacGFP	G19C	0.805
G22C	amacV14LGFP	G19C	0.896
G22C	cgreGFP	G22C	4.881
G22C	ppluGFP	G11C	13.165
G22D	avGFP	G19D	12.11
G22D	cgreGFP	G22D	15.887
G22D	ppluGFP	G11D	14.544
G22R	cgreGFP	G22R	21.494
G22R	ppluGFP	G11R	20.144
G22S	amacGFP	G19S	2.201
G22S	cgreGFP	G22S	5.413
G22S	ppluGFP	G11S	10.209
G22T	ppluGFP	G11T
G22V	cgreGFP	G22V	14.239
G22V	ppluGFP	G11V	15.749
G235A	amacGFP	G227A	-2.094
G235A	amacV14LGFP	G227A	-2.15
G235E	amacGFP	G227E	1.25
G235E	amacV14LGFP	G227E	1.223
G235E	avGFP	G227E	5.672
G235L	amacGFP	G227L	-4.673
G235R	amacGFP	G227R	-2.156
G235R	amacV14LGFP	G227R	-2.081
G235R	avGFP	G227R	3.938
G235V	amacGFP	G227V	-3.066
G235V	amacV14LGFP	G227V	-1.728
G235V	avGFP	G227V	3.798
G235W	amacGFP	G227W	-2.481
G235W	amacV14LGFP	G227W	-2.559
G235W	avGFP	G227W	2.419
G26A	amacGFP	G23A	4.406
G26A	avGFP	G23A	4.201
G26A	cgreGFP	G26A	5.84
G26A	ppluGFP	G15A	5.032
G26C	amacGFP	G23C	6.162
G26C	amacV14LGFP	G23C	6.038
G26C	avGFP	G23C	6.265
G26C	cgreGFP	G26C	7.692
G26C	ppluGFP	G15C	6.69
G26D	amacGFP	G23D	3.164
G26D	amacV14LGFP	G23D	3.082
G26D	avGFP	G23D	3.809
G26D	cgreGFP	G26D	5.177
G26D	ppluGFP	G15D
G26R	amacGFP	G23R	4.75
G26R	cgreGFP	G26R	6.363
G26R	ppluGFP	G15R	5.785
G26S	amacGFP	G23S	3.408
G26S	amacV14LGFP	G23S	3.604
G26S	avGFP	G23S	3.633
G26S	cgreGFP	G26S	5.256
G26S	ppluGFP	G15S	4.407
G26V	cgreGFP	G26V	19.304
G26V	ppluGFP	G15V	19.506
G33A	amacGFP	G30A	4.055
G33A	cgreGFP	G33A	1.41
G33A	ppluGFP	G22A	25.02
G33C	amacGFP	G30C	9.896
G33C	cgreGFP	G33C	3.644
G33C	ppluGFP	G22C	39.877
G33D	amacGFP	G30D	18.39
G33D	cgreGFP	G33D	13.862
G33D	ppluGFP	G22D	26.935
G33R	amacGFP	G30R	39.732
G33R	cgreGFP	G33R	17.299
G33R	ppluGFP	G22R	37.236
G33S	amacGFP	G30S	12.68
G33S	cgreGFP	G33S	6.887
G33S	ppluGFP	G22S	22.383
G33V	avGFP	G30V	8.342
G33V	cgreGFP	G33V	6.688
G33V	ppluGFP	G22V	56.469
G33Y	ppluGFP	G22Y	33.488
G34A	ppluGFP	G23A	3.329
G34C	ppluGFP	G23C	4.499
G34E	ppluGFP	G23E	5.03
G34R	ppluGFP	G23R	3.821
G34V	ppluGFP	G23V	6.477
G34W	ppluGFP	G23W	4.034
G35A	cgreGFP	G35A	6.601
G35A	ppluGFP	G24A	8.8
G35C	amacGFP	G32C	23.384
G35C	cgreGFP	G35C	18.729
G35C	ppluGFP	G24C	20.524
G35D	avGFP	G32D	19.433
G35D	cgreGFP	G35D	34.687
G35D	ppluGFP	G24D	13.532
G35R	avGFP	G32R	28.969
G35R	cgreGFP	G35R	38.545
[truncated: 4,083 more rows]
