# Supplementary material for: Heterogeneity of the GFP fitness landscape and data-driven protein design
Source: eLife. 2022 May 5;11:e75842. doi: 10.7554/eLife.75842 (PMC9119679; doi:10.7554/eLife.75842)
Supplement: Source data 5. — Row and column indices represent the residue position within the protein, starting from 0 for the initial methionine. Matrices for different proteins are included in different tabs in the file. [file elife-75842-data5.xlsx]

## Sheet: amacGFP
	1	2	3	4	5	6	7	8	9	10	11	12	13	14	15	16	17	18	19	20	21	22	23	24	25	26	27	28	29	30	31	32	33	34	35	36	37	38	39	40	41	42	43	44	45	46	47	48	49
1	0	1.33762	3.25673	2.81853	4.40562	6.8039	7.34844	8.72695	12.9154	15.7443	12.9247	16.8239	17.004	19.7248	20.6236	23.3744	25.905	27.9667	30.8105	33.1818	34.1815	38.3959	40.1387	36.8325	36.2738	31.6503	31.2101	27.4482	26.9424	23.7517	23.8166	20.7894	18.5682	15.5717	14.5543	10.8845	11.1598	15.2832	15.3473	16.8419	16.9113	21.1818	20.9626	25.9903	23.7613	29.9629	32.6611	32.1493	35.5989
2	1.33762	0	1.33308	3.1123	3.00221	4.13429	6.53044	7.64756	11.6054	13.8511	10.931	14.8379	16.3761	18.6817	20.7109	23.2011	26.1072	28.4339	31.5097	34.1691	35.6134	39.7958	41.3143	37.7665	36.8237	32.5998	31.3081	27.4	25.2736	23.0073	22.8456	19.4112	17.7967	14.5595	14.5557	11.3937	11.6192	15.8428	16.5248	17.5936	17.3974	21.1725	21.261	25.5975	24.2728	29.7437	32.6018	31.4593	35.4122
3	3.25673	1.33308	0	1.345	3.14507	3.03989	3.36934	6.52038	9.99497	11.5558	8.14449	12.1076	12.9305	15.4631	17.2077	19.9489	22.8354	25.2626	28.3457	31.1003	32.4241	36.7478	38.284	34.5502	33.5696	29.1634	27.9739	24.0651	22.4082	19.6931	19.5566	16.2791	14.5358	11.5384	11.652	8.39482	10.0361	13.3934	13.716	14.3129	13.8312	17.7745	17.6557	22.1534	20.6518	26.2805	29.1426	28.252	32.1258
4	2.81853	3.1123	1.345	0	1.33254	3.10459	2.89537	3.93025	7.28374	9.87263	7.50894	12.1847	13.1997	16.4234	18.2221	21.521	24.4839	27.01	30.0095	32.6357	33.7867	38.1117	39.7466	36.1404	35.2436	30.554	29.3383	25.4043	23.3768	20.4792	19.649	16.1023	13.7587	10.2167	9.65203	6.65429	6.84705	10.8299	11.6721	12.9403	13.4201	16.8695	17.7452	21.9891	21.1008	26.8221	29.8987	29.3452	33.3332
5	4.40562	3.00221	3.14507	1.33254	0	1.33125	3.09672	3.32626	6.45257	8.81646	6.88673	10.7641	13.5706	16.2792	18.9061	21.8116	24.9329	27.6385	30.8201	33.7793	35.1582	39.5687	40.9372	37.0289	35.7904	31.4499	29.7684	25.7929	22.5309	20.4635	19.4701	15.657	13.9799	10.4293	10.9257	8.84819	8.66704	12.5481	13.8041	14.2281	14.7634	17.6431	18.648	22.2543	22.0913	27.1121	30.2608	29.2087	33.4883
6	6.8039	4.13429	3.03989	3.10459	1.33125	0	1.34351	3.52523	6.4682	6.46426	3.45653	7.38746	9.80128	12.3579	15.1205	18.0545	21.2646	23.8586	27.1014	30.0368	31.8805	36.0256	37.2271	33.484	32.12	27.8585	25.9011	21.9196	18.7631	16.5598	15.7501	12.0563	10.7358	7.6765	9.0812	7.25352	8.94472	11.7453	12.5172	11.7069	11.6202	14.594	15.0922	18.6632	18.4142	23.2727	26.3845	25.2988	29.5648
7	7.34844	6.53044	3.36934	2.89537	3.09672	1.34351	0	1.33419	3.38549	5.32355	4.05998	7.64217	7.32013	10.5096	11.7211	15.1199	17.9974	20.6962	23.6963	26.5235	27.5798	32.0904	33.668	29.7088	28.7065	23.9804	22.8323	18.9309	17.8242	14.3935	14.1271	11.2022	9.06609	5.74276	5.41374	3.81043	4.79429	7.29309	8.51132	8.77153	8.01949	12.0802	11.7244	16.3957	14.7975	20.6243	23.5576	23.1608	26.9446
8	8.72695	7.64756	6.52038	3.93025	3.32626	3.52523	1.33419	0	1.32406	3.83351	4.53256	7.91039	11.2059	14.373	17.1443	20.6547	23.8854	26.9973	30.1186	33.1199	34.1736	38.7499	40.0744	36.0344	34.5588	30.0828	27.9875	24.0703	20.2256	18.0597	16.2022	12.2267	10.2864	6.63418	6.37912	6.11174	4.98972	8.90333	10.6587	10.7452	12.1842	13.9351	15.6133	18.7398	19.6257	24.2411	27.5981	26.8848	31.2868
9	12.9154	11.6054	9.99497	7.28374	6.45257	6.4682	3.38549	1.32406	0	1.32488	3.93391	7.47106	9.50833	13.3164	15.2227	19.4943	22.5708	25.7626	28.7064	31.755	32.5407	37.2171	38.4228	34.3363	32.9732	28.1883	26.3406	22.4035	19.3344	16.4746	14.1756	10.3992	7.59034	3.81766	3.86184	4.4716	4.80536	6.96616	8.46493	7.57615	9.51097	10.7541	13.0074	16.1475	17.2258	22.0505	25.4763	25.3513	29.591
10	15.7443	13.8511	11.5558	9.87263	8.81646	6.46426	5.32355	3.83351	1.32488	0	1.34071	4.10886	7.36971	10.7709	13.4054	17.2992	20.4415	23.7928	26.6949	29.9146	30.8341	35.4329	36.121	32.0534	30.3496	25.9313	23.4312	19.6094	15.5852	13.3042	10.2862	6.58815	3.63744	3.48608	3.45424	6.31996	7.48658	7.13956	9.01547	6.1192	8.84286	8.04701	10.2693	12.4027	14.9256	18.1013	21.9314	21.6698	26.0723
11	12.9247	10.931	8.14449	7.50894	6.88673	3.45653	4.05998	4.53256	3.93391	1.34071	0	1.3547	3.61586	6.96181	9.74958	13.3801	16.544	19.846	22.859	26.0995	27.2754	31.8283	32.5913	28.5333	26.8996	22.5303	20.1476	16.318	12.9446	10.094	8.21013	4.37945	3.33759	2.82167	5.07066	6.41383	8.36083	9.86233	10.5606	7.18345	6.70468	7.1904	8.14888	11.0126	12.0802	16.175	19.5245	18.9557	23.2938
12	16.8239	14.8379	12.1076	12.1847	10.7641	7.38746	7.64217	7.91039	7.47106	4.10886	1.3547	0	1.32407	4.39372	7.77674	11.045	14.3371	17.5941	20.7648	24.1392	25.7068	30.1115	30.5806	26.5817	24.7525	20.8164	18.0146	14.1441	9.9755	7.96646	6.98229	3.6228	4.52219	5.06167	7.61371	9.40051	11.7834	13.0626	12.9533	9.41274	8.02796	7.8388	8.1218	10.5077	11.3043	14.6631	17.8455	16.6654	21.1207
13	17.004	16.3761	12.9305	13.1997	13.5706	9.80128	7.32013	11.2059	9.50833	7.36971	3.61586	1.32407	0	1.32926	3.80509	7.71109	10.7833	14.0717	16.9523	20.1273	21.2613	25.8031	26.6333	22.5625	21.0448	16.5419	14.1688	10.4141	7.18153	3.96134	3.47736	2.88452	4.22063	4.02311	6.94211	8.85019	11.5942	12.5023	10.5023	7.2317	4.77241	5.9839	4.30682	7.28232	6.68996	10.7077	13.8272	12.7068	17.1198
14	19.7248	18.6817	15.4631	16.4234	16.2792	12.3579	10.5096	14.373	13.3164	10.7709	6.96181	4.39372	1.32926	0	1.32577	4.081	7.56672	10.8458	14.0156	17.4528	19.3778	23.5943	23.6183	19.8352	17.4829	13.8683	10.8699	7.33003	3.45966	3.47202	4.40172	5.28912	6.82986	8.06533	11.3552	13.3007	16.0231	17.0236	14.9114	11.5835	8.85257	8.49911	6.86077	8.04485	7.03561	9.59966	11.816	9.16306	13.6417
15	20.6236	20.7109	17.2077	18.2221	18.9061	15.1205	11.7211	17.1443	15.2227	13.4054	9.74958	7.77674	3.80509	1.32577	0	1.3256	4.18213	7.56303	10.619	13.7417	15.0274	19.4811	20.2003	16.2575	14.2827	10.4155	7.65929	3.71315	3.29594	2.72355	4.98823	6.51161	8.01856	9.11208	11.6939	13.5684	16.201	15.8332	12.7217	10.5672	6.69869	7.84513	3.67186	7.02163	3.63407	7.00265	9.17447	7.87527	11.4333
16	23.3744	23.2011	19.9489	21.521	21.8116	18.0545	15.1199	20.6547	19.4943	17.2992	13.3801	11.045	7.71109	4.081	1.3256	0	1.33102	4.17107	7.452	10.9433	13.4737	17.3175	17.502	13.6682	11.9967	8.05635	6.06724	3.56335	2.82572	4.9671	6.96057	9.78952	12.2709	13.8067	16.7978	18.5461	21.2201	21.5123	18.5671	16.1972	12.5354	12.6642	8.63586	9.20541	6.78376	7.0511	8.93887	5.97298	9.33977
17	25.905	26.1072	22.8354	24.4839	24.9329	21.2646	17.9974	23.8854	22.5708	20.4415	16.544	14.3371	10.7833	7.56672	4.18213	1.33102	0	1.32844	4.06838	6.96409	8.46391	12.7923	13.7676	9.91663	8.06809	4.1404	3.20921	2.82072	5.15508	6.23614	9.59487	12.4049	15.0174	16.6853	19.55	21.2867	23.9169	23.5934	20.0401	18.6083	14.0647	14.9272	10.4405	10.4215	7.11316	7.07029	7.74068	6.25888	7.30638
18	27.9667	28.4339	25.2626	27.01	27.6385	23.8586	20.6962	26.9973	25.7626	23.7928	19.846	17.5941	14.0717	10.8458	7.56303	4.17107	1.32844	0	1.31522	4.50346	7.71021	11.0298	10.9262	7.69485	6.26103	3.66721	4.49931	5.10328	7.49222	9.42823	12.9069	15.8094	18.403	19.9664	22.7025	24.1813	26.8486	26.6392	23.2184	21.6699	17.1688	18.2101	13.6427	13.4389	10.2268	9.36101	9.72126	8.29934	7.69922
19	30.8105	31.5097	28.3457	30.0095	30.8201	27.1014	23.6963	30.1186	28.7064	26.6949	22.859	20.7648	16.9523	14.0156	10.619	7.452	4.06838	1.31522	0	1.3301	4.33961	7.70345	7.47616	3.98231	3.2988	2.73286	4.85877	5.99849	9.26544	11.7938	15.3588	18.4526	21.0768	22.7477	25.3851	26.9252	29.5126	28.9244	25.3048	24.0183	19.3816	20.4394	15.8613	15.3392	11.9744	10.2703	8.91257	9.0054	7.04762
20	33.1818	34.1691	31.1003	32.6357	33.7793	30.0368	26.5235	33.1199	31.755	29.9146	26.0995	24.1392	20.1273	17.4528	13.7417	10.9433	6.96409	4.50346	1.3301	0	1.33687	4.24195	4.10549	3.35403	3.37567	3.90227	7.20538	9.12266	12.5232	15.1215	18.6551	21.7438	24.2417	25.8066	28.2501	29.5914	32.1661	31.3107	27.5396	26.5876	21.8271	23.2821	18.8324	18.354	14.7679	13.058	10.4481	11.873	9.05225
21	34.1815	35.6134	32.4241	33.7867	35.1582	31.8805	27.5798	34.1736	32.5407	30.8341	27.2754	25.7068	21.2613	19.3778	15.0274	13.4737	8.46391	7.71021	4.33961	1.33687	0	1.3222	3.21084	2.93833	5.07313	3.91016	9.2003	10.2032	14.2751	16.6186	19.9165	22.8805	25.0592	26.5202	28.6251	29.9946	32.3458	30.7185	26.9326	26.3884	21.6851	23.4312	19.3693	18.9211	15.2	14.2567	11.1486	13.8824	10.2101
22	38.3959	39.7958	36.7478	38.1117	39.5687	36.0256	32.0904	38.7499	37.2171	35.4329	31.8283	30.1115	25.8031	23.5943	19.4811	17.3175	12.7923	11.0298	7.70345	4.24195	1.3222	0	1.33757	3.13099	6.55593	7.46515	12.3308	14.2004	18.0519	20.7532	24.161	27.2718	29.6265	31.1868	33.3668	34.6838	37.0893	35.4874	31.7017	31.1706	26.4633	28.0499	23.9081	23.1639	19.6667	17.8368	13.8419	16.7629	12.8675
23	40.1387	41.3143	38.284	39.7466	40.9372	37.2271	33.668	40.0744	38.4228	36.121	32.5913	30.5806	26.6333	23.6183	20.2003	17.502	13.7676	10.9262	7.47616	4.10549	3.21084	1.33757	0	1.33531	3.9604	7.39779	10.9514	14.0916	17.4983	20.6541	24.1253	27.4763	30.2493	32.2215	34.7809	36.4766	38.9232	37.5178	33.7359	32.8637	28.3111	28.9106	24.5579	23.2541	20.039	17.0435	12.5175	14.2889	10.4864
24	36.8325	37.7665	34.5502	36.1404	37.0289	33.484	29.7088	36.0344	34.3363	32.0534	28.5333	26.5817	22.5625	19.8352	16.2575	13.6682	9.91663	7.69485	3.98231	3.35403	2.93833	3.13099	1.33531	0	1.33153	3.74705	7.38573	10.2182	13.6482	16.6917	20.1646	23.4715	26.1832	28.1244	30.6801	32.4212	34.8893	33.6372	29.8949	28.7911	24.2798	24.8644	20.4952	19.3531	16.0938	13.3471	9.26808	11.5966	7.57257
25	36.2738	36.8237	33.5696	35.2436	35.7904	32.12	28.7065	34.5588	32.9732	30.3496	26.8996	24.7525	21.0448	17.4829	14.2827	11.9967	8.06809	6.26103	3.2988	3.37567	5.07313	6.55593	3.9604	1.33153	0	1.32287	4.66819	8.04407	11.3701	14.6607	18.1267	21.5425	24.5214	26.7217	29.5439	31.4708	34.05	33.1316	29.4696	27.9595	23.6589	23.4966	19.0079	17.4513	14.5248	11.0067	6.74209	8.16197	4.25794
26	31.6503	32.5998	29.1634	30.554	31.4499	27.8585	23.9804	30.0828	28.1883	25.9313	22.5303	20.8164	16.5419	13.8683	10.4155	8.05635	4.1404	3.66721	2.73286	3.90227	3.91016	7.46515	7.39779	3.74705	1.32287	0	1.31737	4.22711	7.83463	10.8789	14.2523	17.5239	20.0314	21.9141	24.3974	26.2104	28.6809	27.3387	23.6273	22.4233	18.0037	18.5667	14.2687	13.328	10.0269	7.79366	4.45145	6.05305	3.1537
27	31.2101	31.3081	27.9739	29.3383	29.7684	25.9011	22.8323	27.9875	26.3406	23.4312	20.1476	18.0146	14.1688	10.8699	7.65929	6.06724	3.20921	4.49931	4.85877	7.20538	9.2003	12.3308	10.9514	7.38573	4.66819	1.31737	0	1.32639	4.32191	7.67155	11.0992	14.5377	17.6271	20.033	23.0472	25.1959	27.8578	27.1397	23.734	21.7479	17.8468	16.8553	12.3081	10.4153	7.79454	3.97217	3.33731	2.91145	3.08171
28	27.4482	27.4	24.0651	25.4043	25.7929	21.9196	18.9309	24.0703	22.4035	19.6094	16.318	14.1441	10.4141	7.33003	3.71315	3.56335	2.82072	5.10328	5.99849	9.12266	10.2032	14.2004	14.0916	10.2182	8.04407	4.22711	1.32639	0	1.31805	4.22601	7.74185	10.9537	13.6402	15.9485	18.7494	20.9564	23.5618	22.4945	19.0405	17.0932	13.3165	12.3399	7.8954	6.8832	3.83682	3.28524	4.41377	4.43527	5.74352
29	26.9424	25.2736	22.4082	23.3768	22.5309	18.7631	17.8242	20.2256	19.3344	15.5852	12.9446	9.9755	7.18153	3.45966	3.29594	2.82572	5.15508	7.49222	9.26544	12.5232	14.2751	18.0519	17.4983	13.6482	11.3701	7.83463	4.32191	1.31805	0	1.33082	2.7158	7.85124	11.0858	13.797	17.03	19.4597	22.1763	21.7055	18.7488	16.0316	13.0234	10.4953	6.32487	3.93576	3.42596	2.88315	5.08493	3.88074	7.41987
30	23.7517	23.0073	19.6931	20.4792	20.4635	16.5598	14.3935	18.0597	16.4746	13.3042	10.094	7.96646	3.96134	3.47202	2.72355	4.9671	6.23614	9.42823	11.7938	15.1215	16.6186	20.7532	20.6541	16.6917	14.6607	10.8789	7.67155	4.22601	1.33082	0	1.33306	4.4475	7.6768	10.3739	13.7675	16.1618	18.9107	18.8133	16.1954	13.0317	10.4406	7.59436	3.9611	3.30225	3.51205	4.94935	7.43604	7.00509	10.7532
31	23.8166	22.8456	19.5566	19.649	19.4701	15.7501	14.1271	16.2022	14.1756	10.2862	8.21013	6.98229	3.47736	4.40172	4.98823	6.96057	9.59487	12.9069	15.3588	18.6551	19.9165	24.161	24.1253	20.1646	18.1267	14.2523	11.0992	7.74185	2.7158	1.33306	0	1.32222	4.71898	8.04476	11.4385	14.2484	16.9103	15.9509	14.5693	10.9133	8.36199	4.47788	3.47852	2.93884	5.09677	6.38476	9.67024	7.88913	12.7336
32	20.7894	19.4112	16.2791	16.1023	15.657	12.0563	11.2022	12.2267	10.3992	6.58815	4.37945	3.6228	2.88452	5.28912	6.51161	9.78952	12.4049	15.8094	18.4526	21.7438	22.8805	27.2718	27.4763	23.4715	21.5425	17.5239	14.5377	10.9537	7.85124	4.4475	1.32222	0	1.32621	4.63262	8.07257	10.9258	13.5375	13.199	12.0747	8.11278	6.97315	3.12583	4.04066	4.96007	7.418	9.57821	13.0065	12.7179	17.0144
33	18.5682	17.7967	14.5358	13.7587	13.9799	10.7358	9.06609	10.2864	7.59034	3.63744	3.33759	4.52219	4.22063	6.82986	8.01856	12.2709	15.0174	18.403	21.0768	24.2417	25.0592	29.6265	30.2493	26.1832	24.5214	20.0314	17.6271	13.6402	11.0858	7.6768	4.71898	1.32621	0	1.32198	4.42841	7.34877	9.93278	9.28102	8.01937	4.02694	3.62781	2.9179	4.83404	6.73372	9.10193	12.5624	16.0508	16.2163	20.3673
34	15.5717	14.5595	11.5384	10.2167	10.4293	7.6765	5.74276	6.63418	3.81766	3.48608	2.82167	5.06167	4.02311	8.06533	9.11208	13.8067	16.6853	19.9664	22.7477	25.8066	26.5202	31.1868	32.2215	28.1244	26.7217	21.9141	20.033	15.9485	13.797	10.3739	8.04476	4.63262	1.32198	0	1.32751	3.91239	6.48954	7.11788	6.79509	3.36031	3.77846	5.27459	6.53447	9.83414	10.8182	15.5685	18.976	19.1922	23.2437
35	14.5543	14.5557	11.652	9.65203	10.9257	9.0812	5.41374	6.37912	3.86184	3.45424	5.07066	7.61371	6.94211	11.3552	11.6939	16.7978	19.55	22.7025	25.3851	28.2501	28.6251	33.3668	34.7809	30.6801	29.5439	24.3974	23.0472	18.7494	17.03	13.7675	11.4385	8.07257	4.42841	1.32751	0	1.33963	3.2083	3.02529	2.99967	2.90071	5.16642	6.49688	9.02346	12.5856	13.1722	18.5637	21.9385	22.5521	26.4211
36	10.8845	11.3937	8.39482	6.65429	8.84819	7.25352	3.81043	6.11174	4.4716	6.31996	6.41383	9.40051	8.85019	13.3007	13.5684	18.5461	21.2867	24.1813	26.9252	29.5914	29.9946	34.6838	36.4766	32.4212	31.4708	26.2104	25.1959	20.9564	19.4597	16.1618	14.2484	10.9258	7.34877	3.91239	1.33963	0	1.32755	3.08478	3.07879	4.84878	6.88855	9.25244	11.5483	15.4611	15.3332	21.2007	24.485	25.0605	28.8503
37	11.1598	11.6192	10.0361	6.84705	8.66704	8.94472	4.79429	4.98972	4.80536	7.48658	8.36083	11.7834	11.5942	16.0231	16.201	21.2201	23.9169	26.8486	29.5126	32.1661	32.3458	37.0893	38.9232	34.8893	34.05	28.6809	27.8578	23.5618	22.1763	18.9107	16.9103	13.5375	9.93278	6.48954	3.2083	1.32755	0	1.34463	3.50931	5.82462	8.93473	11.4804	14.1152	17.9558	17.8449	23.8133	27.0934	27.7914	31.5394
38	15.2832	15.8428	13.3934	10.8299	12.5481	11.7453	7.29309	8.90333	6.96616	7.13956	9.86233	13.0626	12.5023	17.0236	15.8332	21.5123	23.5934	26.6392	28.9244	31.3107	30.7185	35.4874	37.5178	33.6372	33.1316	27.3387	27.1397	22.4945	21.7055	18.8133	15.9509	13.199	9.28102	7.11788	3.02529	3.08478	1.34463	0	1.34066	3.20422	6.7207	6.95946	12.3397	15.7632	16.4251	22.214	25.5226	27.1956	30.6541
39	15.3473	16.5248	13.716	11.6721	13.8041	12.5172	8.51132	10.6587	8.46493	9.01547	10.5606	12.9533	10.5023	14.9114	12.7217	18.5671	20.0401	23.2184	25.3048	27.5396	26.9326	31.7017	33.7359	29.8949	29.4696	23.6273	23.734	19.0405	18.7488	16.1954	14.5693	12.0747	8.01937	6.79509	2.99967	3.07879	3.50931	1.34066	0	1.33569	4.14815	7.70835	10.0361	14.1042	13.051	19.5282	22.5154	24.4353	27.4163
40	16.8419	17.5936	14.3129	12.9403	14.2281	11.7069	8.77153	10.7452	7.57615	6.1192	7.18345	9.41274	7.2317	11.5835	10.5672	16.1972	18.6083	21.6699	24.0183	26.5876	26.3884	31.1706	32.8637	28.7911	27.9595	22.4233	21.7479	17.0932	16.0316	13.0317	10.9133	8.11278	4.02694	3.36031	2.90071	4.84878	5.82462	3.20422	1.33569	0	1.33846	2.43036	7.47879	11.1035	11.122	17.0158	20.243	21.651	25.1347
41	16.9113	17.3974	13.8312	13.4201	14.7634	11.6202	8.01949	12.1842	9.51097	8.84286	6.70468	8.02796	4.77241	8.85257	6.69869	12.5354	14.0647	17.1688	19.3816	21.8271	21.6851	26.4633	28.3111	24.2798	23.6589	18.0037	17.8468	13.3165	13.0234	10.4406	8.36199	6.97315	3.62781	3.77846	5.16642	6.88855	8.93473	6.7207	4.14815	1.33846	0	1.32892	4.2037	7.75203	7.49458	13.7868	16.9967	18.6911	21.7665
42	21.1818	21.1725	17.7745	16.8695	17.6431	14.594	12.0802	13.9351	10.7541	8.04701	7.1904	7.8388	5.9839	8.49911	7.84513	12.6642	14.9272	18.2101	20.4394	23.2821	23.4312	28.0499	28.9106	24.8644	23.4966	18.5667	16.8553	12.3399	10.4953	7.59436	4.47788	3.12583	2.9179	5.27459	6.49688	9.25244	11.4804	6.95946	7.70835	2.43036	1.32892	0	1.32019	4.54091	6.9033	11.0256	14.4542	15.7579	19.4529
43	20.9626	21.261	17.6557	17.7452	18.648	15.0922	11.7244	15.6133	13.0074	10.2693	8.14888	8.1218	4.30682	6.86077	3.67186	8.63586	10.4405	13.6427	15.8613	18.8324	19.3693	23.9081	24.5579	20.4952	19.0079	14.2687	12.3081	7.8954	6.32487	3.9611	3.47852	4.04066	4.83404	6.53447	9.02346	11.5483	14.1152	12.3397	10.0361	7.47879	4.2037	1.32019	0	1.3222	3.55538	7.31686	10.6408	11.8409	15.2915
44	25.9903	25.5975	22.1534	21.9891	22.2543	18.6632	16.3957	18.7398	16.1475	12.4027	11.0126	10.5077	7.28232	8.04485	7.02163	9.20541	10.4215	13.4389	15.3392	18.354	18.9211	23.1639	23.2541	19.3531	17.4513	13.328	10.4153	6.8832	3.93576	3.30225	2.93884	4.96007	6.73372	9.83414	12.5856	15.4611	17.9558	15.7632	14.1042	11.1035	7.75203	4.54091	1.3222	0	1.32241	3.92928	7.74078	8.97018	12.538
45	23.7613	24.2728	20.6518	21.1008	22.0913	18.4142	14.7975	19.6257	17.2258	14.9256	12.0802	11.3043	6.68996	7.03561	3.63407	6.78376	7.11316	10.2268	11.9744	14.7679	15.2	19.6667	20.039	16.0938	14.5248	10.0269	7.79454	3.83682	3.42596	3.51205	5.09677	7.418	9.10193	10.8182	13.1722	15.3332	17.8449	16.4251	13.051	11.122	7.49458	6.9033	3.55538	1.32241	0	1.33479	4.41124	7.12072	9.74829
46	29.9629	29.7437	26.2805	26.8221	27.1121	23.2727	20.6243	24.2411	22.0505	18.1013	16.175	14.6631	10.7077	9.59966	7.00265	7.0511	7.07029	9.36101	10.2703	13.058	14.2567	17.8368	17.0435	13.3471	11.0067	7.79366	3.97217	3.28524	2.88315	4.94935	6.38476	9.57821	12.5624	15.5685	18.5637	21.2007	23.8133	22.214	19.5282	17.0158	13.7868	11.0256	7.31686	3.92928	1.33479	0	1.32044	3.33431	6.01614
47	32.6611	32.6018	29.1426	29.8987	30.2608	26.3845	23.5576	27.5981	25.4763	21.9314	19.5245	17.8455	13.8272	11.816	9.17447	8.93887	7.74068	9.72126	8.91257	10.4481	11.1486	13.8419	12.5175	9.26808	6.74209	4.45145	3.33731	4.41377	5.08493	7.43604	9.67024	13.0065	16.0508	18.976	21.9385	24.485	27.0934	25.5226	22.5154	20.243	16.9967	14.4542	10.6408	7.74078	4.41124	1.32044	0	1.33279	3.23112
48	32.1493	31.4593	28.252	29.3452	29.2087	25.2988	23.1608	26.8848	25.3513	21.6698	18.9557	16.6654	12.7068	9.16306	7.87527	5.97298	6.25888	8.29934	9.0054	11.873	13.8824	16.7629	14.2889	11.5966	8.16197	6.05305	2.91145	4.43527	3.88074	7.00509	7.88913	12.7179	16.2163	19.1922	22.5521	25.0605	27.7914	27.1956	24.4353	21.651	18.6911	15.7579	11.8409	8.97018	7.12072	3.33431	1.33279	0	1.32937
49	35.5989	35.4122	32.1258	33.3332	33.4883	29.5648	26.9446	31.2868	29.591	26.0723	23.2938	21.1207	17.1198	13.6417	11.4333	9.33977	7.30638	7.69922	7.04762	9.05225	10.2101	12.8675	10.4864	7.57257	4.25794	3.1537	3.08171	5.74352	7.41987	10.7532	12.7336	17.0144	20.3673	23.2437	26.4211	28.8503	31.5394	30.6541	27.4163	25.1347	21.7665	19.4529	15.2915	12.538	9.74829	6.01614	3.23112	1.32937	0
50	37.524	37.5961	34.1444	35.0053	35.4056	31.5173	28.6023	32.789	30.6526	27.0392	24.7128	22.9802	18.9425	16.0186	13.7088	12.059	10.4512	11.9185	10.78	12.6724	13.0041	14.672	12.7606	10.1695	7.20158	6.68599	5.92995	7.93149	9.51463	12.4689	14.6408	18.141	21.1942	24.1451	27.0477	29.5788	32.1537	30.2828	27.2208	25.1459	21.8342	19.3979	15.7582	12.1764	9.15099	6.43994	3.2141	3.5291	1.31889
51	38.1088	38.6013	35.0947	36.0343	36.7382	32.8783	29.5371	34.319	32.0919	28.8292	26.3166	24.6963	20.7266	18.3777	15.2041	14.4979	11.0788	11.7482	9.53989	10.6986	9.69825	11.4532	10.3802	7.04637	6.17787	5.24439	7.38532	8.16556	11.1789	14.0982	16.7139	20.026	22.8634	25.5503	28.2345	30.5889	33.091	31.0986	27.6931	26.0151	22.5786	20.79	17.0787	14.3218	10.822	8.48116	4.02104	6.88656	4.28046
52	33.1299	34.0404	30.4933	31.288	32.3724	28.6682	24.8346	30.0965	27.6792	25.0186	22.3828	21.0389	16.7719	15.2574	11.4192	10.9085	6.5521	8.90002	7.84852	8.92197	8.33729	10.979	10.6856	7.06315	7.51247	3.47422	5.48187	3.93313	8.2379	10.7649	13.672	16.7916	19.041	21.2276	23.5056	25.6156	27.9839	25.6821	22.1642	20.9217	17.2228	16.6001	13.0666	11.3703	7.9779	6.82585	3.94631	7.07143	6.28255
53	36.3009	37.2096	33.7237	34.9217	35.8276	32.1223	28.3548	34.003	31.8885	29.2052	26.2187	24.5833	20.3893	18.3807	14.675	13.3745	8.96084	9.46339	6.76467	6.95348	5.37194	7.41662	7.29399	3.73631	5.27439	3.52099	6.81717	7.28708	11.3163	14.2062	17.2741	20.5576	23.1949	25.4392	27.9432	29.9777	32.4286	30.5443	26.9297	25.6685	21.64	21.2498	17.2712	15.4832	12.2133	9.93515	5.4351	9.04184	6.21947
54	33.4187	34.8556	31.326	32.4139	33.6625	30.2014	25.9511	32.0799	29.8053	27.726	24.687	23.4461	18.8282	17.7181	13.2075	13.0518	7.25364	9.78037	7.99249	7.41549	4.25813	7.3744	9.39101	6.89004	8.83074	4.34051	9.36816	7.44213	12.0463	14.0614	16.908	19.7812	21.8309	23.5554	25.5966	27.3336	29.6	27.3388	23.6592	22.9587	18.7171	19.2966	15.7543	14.407	11.0575	10.6668	8.01415	11.4438	9.51013
55	32.5916	34.1829	30.5627	31.2471	32.7058	29.3027	24.9751	30.7091	28.1158	26.0996	23.502	22.7171	17.9986	17.8355	13.3228	14.5174	8.80888	12.839	11.4602	11.7874	8.33658	11.1424	13.4744	10.3888	12.3618	7.86673	11.6253	8.63048	12.9004	14.1303	16.309	18.7634	20.3522	21.9636	23.6628	25.4215	27.5342	24.6341	21.0896	20.5977	16.7818	17.5301	14.2651	13.651	10.3594	11.405	9.70305	12.9732	12.4372
56	29.8348	30.6423	27.0416	27.6488	28.5648	24.8145	21.2683	26.0142	23.5792	20.7239	18.2118	17.0694	12.7986	12.2909	8.73613	10.2493	6.98297	10.6565	10.9239	12.8623	10.863	14.6099	16.2359	12.8518	11.7456	7.3224	6.31556	3.88127	6.19204	7.60066	9.66401	12.4883	14.7382	17.0754	19.5077	21.7921	24.2406	21.3412	17.8051	17.1467	13.5378	12.3863	8.79981	7.0713	3.64014	3.99018	3.75508	6.67893	8.68245
57	29.0077	31.0383	27.4358	27.8847	29.6661	26.5997	21.9657	27.6116	25.1543	23.8763	21.3944	21.1467	16.3614	17.2312	12.7664	15.2425	10.0101	14.8112	13.7961	14.6636	11.8466	16.0388	18.2972	15.2257	15.8841	10.3946	13.2527	9.95812	13.5012	13.8646	15.5919	17.5924	18.0231	19.2873	20.5677	21.826	23.7854	20.5329	17.0157	17.2021	13.4388	15.492	12.4354	12.6747	9.38418	11.9096	11.3812	14.4264	14.9331
58	28.765	30.7464	27.3225	28.2481	29.9092	26.8687	22.118	28.3392	26.286	24.9596	22.031	21.3794	16.5357	16.6202	11.8843	13.4046	7.78394	11.7547	10.6381	11.0211	7.69741	11.7265	14.0249	11.523	13.0302	7.3942	12.477	9.57655	13.4516	14.085	16.23	18.3146	19.192	20.3542	21.8699	23.0619	25.2212	22.5636	18.8908	18.8715	14.5907	16.9768	13.605	14.3688	10.559	13.3293	11.7423	14.5476	13.6176
59	25.5551	27.1565	23.5658	24.4597	25.9222	22.6707	18.1373	24.2844	22.2387	20.9143	17.7232	16.9605	12.1219	12.2587	7.5834	9.69049	4.10001	8.22117	7.18166	8.27702	6.63208	11.3789	13.349	9.85745	9.96911	3.91918	7.34859	4.27038	8.60986	10.1686	12.4075	14.3035	15.2806	16.3079	17.9999	19.3768	21.6061	19.6592	15.8858	15.4279	10.8173	13.4575	9.56418	11.3596	6.70926	8.32892	7.44986	9.63599	9.43255
60	23.0788	24.8123	21.1958	21.8322	23.4772	20.3797	15.7132	21.668	19.6164	18.7102	15.6815	15.3729	10.5998	11.7859	7.34638	11.0089	7.41843	12.2983	12.2591	13.636	11.9006	16.5763	18.7111	15.2797	15.7386	9.54116	12.3288	8.67439	11.5598	10.5314	12.0779	13.2123	13.0086	13.7982	15.2802	16.4054	18.593	15.7409	12.1369	12.3429	7.92825	11.5059	7.71061	11.0509	6.02501	11.5002	12.183	14.3789	15.1456
61	21.3538	23.3699	20.0209	20.9218	22.6485	20.0442	15.0726	21.5367	20.2639	19.9885	16.6122	16.0548	11.6631	12.0757	8.49814	11.1082	8.21952	12.1183	12.8532	14.3141	12.5848	17.0146	19.4717	16.879	17.5492	11.4736	14.1186	10.5586	13.2868	12.5054	14.1719	15.1787	14.7206	14.8766	16.2778	16.5802	18.8993	17.452	13.7084	14.026	9.08392	13.626	9.83525	13.1904	8.14796	13.5981	14.6211	16.6166	17.3842
62	21.5743	23.0394	19.651	20.9643	22.3545	19.2814	14.6635	21.329	20.1171	19.2639	15.5864	14.4036	10.0704	9.36979	5.62644	7.61565	4.08456	7.30313	8.11503	9.70617	9.63898	14.1759	16.2015	12.8653	13.2204	7.84411	10.4835	8.40516	10.8349	10.1803	12.1196	13.566	14.3668	14.6495	16.4397	17.0913	19.6646	18.9136	15.2578	14.7835	9.72231	13.7028	9.16241	12.4335	7.12516	12.2802	13.0195	13.8993	13.8452
63	20.4823	21.5156	17.9211	18.9323	20.142	16.7684	12.432	18.6924	16.9965	15.9442	12.2316	11.3321	6.65427	7.06764	3.34661	5.91375	3.83033	7.32795	8.93528	11.543	11.9719	16.6382	17.7844	13.685	12.8566	7.42083	7.5275	3.78024	6.16924	6.01182	8.61617	10.1176	10.8223	11.3113	13.2393	14.595	17.0088	16.3184	12.8055	11.7116	6.83594	10.2818	5.63095	8.00937	3.65687	7.41574	8.48102	9.99319	11.5093
64	16.6717	18.2061	14.8786	16.1032	17.7267	15.0628	10.2023	17.0123	15.0493	14.5283	11.7125	11.8074	7.72174	8.56106	5.10543	9.01757	8.06769	11.5509	13.2842	15.4009	15.1694	19.9297	21.8232	17.9983	17.7531	11.9227	12.8883	8.85885	10.3589	9.1183	10.4585	10.59	8.94635	9.36379	10.6843	11.8129	13.9873	12.2948	8.51688	8.09935	3.28718	7.90132	4.8983	9.86586	5.05053	11.7006	13.5237	15.2157	16.8284
67	14.1584	15.7546	12.1455	12.6782	14.4381	11.9217	6.87215	13.0139	11.9676	11.1312	7.6498	7.44135	3.72847	6.11198	4.18287	8.38663	10.5824	13.115	15.8578	18.5619	18.8038	23.4296	25.3179	21.6726	20.8875	15.8963	15.4106	11.7661	10.9755	8.38076	8.65294	7.70925	6.75078	6.49452	8.42835	8.14388	10.8217	10.8629	8.08315	7.54504	3.82359	7.50069	4.31114	9.76875	6.85529	13.2545	16.0601	16.6504	19.7989
68	11.5188	14.0757	10.9275	10.8773	12.9303	11.9611	6.9794	12.597	12.8129	13.9376	11.3361	11.8293	9.17517	10.9575	9.06221	12.999	14.2964	16.7324	19.0414	21.1349	20.729	25.1655	27.4067	24.3508	24.2077	18.7873	19.3436	15.7017	15.9163	13.8431	14.5725	13.3891	11.4453	9.95905	9.60629	7.41633	9.9768	10.3326	8.00114	9.18174	6.38576	11.9467	9.5366	15.2788	11.2273	18.137	20.4446	21.3379	23.5799
69	9.44328	11.0425	7.59838	7.62611	9.4356	8.09933	3.62972	8.6972	9.39629	10.7584	7.70479	8.66504	7.19552	9.56424	9.53142	12.8129	15.2912	17.7098	20.538	23.1503	23.9216	28.4395	30.2175	26.4604	25.7335	20.8543	20.3045	16.5598	16.0612	13.1514	13.7063	11.7654	10.0753	8.02711	7.28085	4.24591	7.37537	9.15167	7.56092	8.42489	7.05401	11.6948	10.2143	15.5278	12.629	18.877	21.4927	21.4156	24.7184
70	11.6181	12.8288	9.36384	8.9999	9.98411	6.73528	3.72072	7.75607	6.28481	6.21164	3.84775	5.06986	3.54201	7.3711	7.75916	11.9632	14.7863	17.7208	20.6172	23.5183	24.2165	28.8775	30.4509	26.4094	25.3307	20.427	19.2081	15.3539	13.9529	10.6525	10.2733	7.63449	5.45954	3.48497	4.03533	3.50955	5.53162	5.39076	3.24257	4.22359	3.55455	7.98494	7.31602	12.2391	10.5006	16.4999	19.499	19.4855	23.1996
71	10.8338	13.1503	10.3025	9.10253	11.0616	10.7587	7.00055	9.97328	10.1222	12.2177	10.4881	12.5237	10.0676	14.0942	12.3569	17.334	19.1808	21.8869	24.2478	26.4885	26.3831	31.0498	33.0746	29.4617	29.1233	23.4987	23.7099	19.5313	19.2055	16.5825	15.8862	13.5622	10.2828	8.29011	6.40817	3.74125	5.78061	6.04953	4.18232	6.26936	6.78176	10.9223	11.163	16.4492	14.0448	20.9854	23.7881	24.9219	27.9377
72	12.3274	15.0075	12.4869	9.67208	12.6803	12.639	9.04854	11.1806	10.8291	11.0367	12.165	15.1217	12.8135	17.1234	15.4417	20.7031	22.4432	25.2686	27.5226	29.6651	29.263	33.9434	36.0632	32.5069	32.2543	26.4783	26.8097	22.4312	22.1221	19.4975	18.2643	15.6479	11.8912	9.5875	6.29327	3.44951	2.84571	3.62235	3.61553	5.96619	8.7993	12.2615	13.6818	18.5052	16.6992	23.5546	26.448	27.8745	30.9253
73	9.66467	12.8392	10.9898	7.03365	11.5272	12.7818	9.33619	11.4923	12.1182	14.2957	13.4199	17.019	15.0668	18.6225	16.987	21.2993	22.4314	24.8582	26.8808	28.4949	28.1216	32.427	34.6803	31.8558	32.1348	26.5755	27.759	23.8885	23.944	21.4597	21.1822	18.4002	14.766	11.9323	8.59791	5.05827	6.55845	7.48266	6.63581	8.99676	11.9428	15.4415	16.3399	21.7048	18.7986	25.8892	28.4367	29.5396	31.925
74	11.3192	14.3862	13.786	8.08106	13.4296	15.3483	12.0995	13.6888	14.5583	16.6395	16.3541	20.2151	18.6502	22.9192	21.5762	26.5879	28.0486	30.7968	32.8996	34.7354	34.0443	38.5765	40.872	37.7057	37.7741	31.9078	32.7247	28.4096	28.3531	25.6389	24.394	21.5428	17.7872	14.903	11.2048	7.67617	7.72998	9.3967	8.97588	11.5781	14.837	18.308	19.9419	24.7387	22.7717	29.7346	32.5186	34.0924	36.8217
75	9.54135	12.4776	12.8726	6.16564	10.3981	13.9534	12.9035	11.6027	14.2954	17.5757	17.4225	21.796	20.966	25.2165	24.4888	29.3089	31.3756	33.9481	36.311	38.3683	38.0221	42.5743	44.7709	41.4611	41.3066	35.6157	35.9652	31.7374	31.1914	28.2371	26.8652	23.7743	20.1257	16.8522	13.2543	9.68398	8.90798	11.0933	11.4292	14.1986	17.6356	20.9516	22.9134	27.5124	26.0725	32.8453	35.812	36.9212	40.1692
76	12.1031	15.5853	15.8026	9.50564	15.0584	17.5046	15.5077	15.7168	17.6745	20.5295	20.1483	24.4483	23.4204	27.5639	26.5213	31.0294	32.5461	34.9956	37.1593	38.8095	37.8263	42.1706	44.6075	41.8313	42.2138	36.2965	37.4763	33.1639	33.3024	30.6051	29.4509	26.4589	22.8344	19.6198	16.0778	12.4411	11.7927	13.9779	13.8934	16.4177	19.616	23.1585	24.866	29.5848	27.5694	34.5583	37.2648	39.0293	41.5
77	9.83081	12.9727	12.8973	8.22717	13.536	15.5675	13.3433	15.3054	17.3587	19.8928	18.2409	21.987	20.5074	24.2067	22.9605	27.0726	28.4262	30.8401	32.8305	34.235	33.3862	37.5947	40.0167	37.453	37.9739	32.2175	33.732	29.8698	29.9065	27.2615	26.8584	24.2831	20.8865	18.0936	14.8159	11.2444	11.9041	13.2308	12.5082	14.959	17.6999	21.37	22.2608	27.4328	24.8053	31.9153	34.3647	35.4921	37.7877
78	6.03102	9.10966	9.45846	3.81317	9.1204	10.9818	8.52427	9.06988	10.7306	13.5584	13.0469	17.4279	16.9771	21.1136	21.0372	25.5933	28.0497	30.0588	32.526	34.5099	34.717	39.0083	41.0782	38.0434	37.9418	32.7141	32.6346	28.5569	27.6112	24.4216	23.1242	19.933	16.4373	13.0188	10.023	6.45194	5.09615	8.4729	9.07163	11.626	14.8187	17.9066	19.6739	24.2519	23.0108	29.5699	32.6261	33.2723	36.7827
79	7.11572	10.5031	11.6211	6.88271	12.1567	14.4706	13.0574	14.723	17.5309	20.2637	18.2708	22.3513	21.3606	24.6097	24.0364	27.4479	28.9462	30.9353	33.2038	34.8707	35.0101	39.0492	41.1752	38.5523	38.7336	33.5918	34.4278	31.0175	30.8882	28.1855	27.9602	25.2521	22.0588	18.9966	16.5164	12.8494	12.6244	15.526	15.1988	17.4359	19.3996	23.3833	23.7892	29.1137	26.3295	33.2773	35.7489	36.2916	38.6742
80	8.43586	11.578	11.6247	8.60241	13.1813	14.8533	12.1342	15.8324	18.2168	20.3648	17.5889	20.4696	18.9088	21.4947	20.4955	23.924	24.8635	27.0915	29.1992	30.7723	30.6647	34.7834	36.982	34.3449	34.6375	29.3507	30.5087	27.1173	27.357	24.976	25.2845	23.1833	20.3574	17.9411	15.9156	12.6362	13.9099	15.6366	14.0955	16.173	16.3744	21.2132	20.5104	26.1664	22.6045	29.6215	31.9106	32.7148	34.6661
81	5.08487	8.43863	7.63939	5.77342	8.79686	9.99726	6.81798	10.2026	12.3176	14.4492	11.8083	15.2994	14.0806	17.2073	16.5463	20.1502	22.1414	24.2084	26.6748	28.7358	29.0277	33.3904	35.4006	32.2221	32.0552	26.8363	27.2291	23.7102	23.3846	20.6441	20.6878	18.0825	15.04	12.2446	10.3664	6.87399	8.79549	10.636	9.61713	11.4291	12.315	16.56	16.4806	21.9727	18.9847	25.8226	28.3763	28.835	31.5449
82	6.63033	9.41395	7.91767	8.2399	10.9657	10.5075	8.09864	13.9965	16.6851	17.8385	14.3782	16.3478	15.6087	16.8086	16.8817	18.2194	19.3208	21.0151	23.2409	24.8689	25.634	29.4281	31.3036	28.7618	28.8941	24.4294	25.3253	22.2252	23.1588	21.0926	22.172	20.0752	17.9947	15.9245	15.1016	11.6226	14.1032	15.8404	14.1327	15.903	14.7518	19.6179	18.127	23.7284	19.8189	26.073	27.903	27.6121	29.4124
83	6.90341	9.15979	6.90502	7.36233	9.78536	8.34956	5.31777	11.8825	14.1657	14.9211	11.3187	13.0305	12.4057	13.9649	13.8211	16.6516	17.3232	19.6104	21.6404	23.2386	23.3102	27.4821	29.5899	26.8279	27.0893	21.906	23.1886	19.9946	20.4304	18.1025	18.7866	16.8345	14.7227	12.7493	12.414	9.33256	12.2395	13.4292	11.2306	12.7292	11.0452	16.0581	14.457	20.1044	16.1992	22.9305	25.0019	25.5655	27.2723
84	4.18884	5.53504	3.33779	4.14096	6.29167	5.87018	3.6029	7.10976	8.92433	11.0385	8.57178	12.3745	11.4569	14.9745	15.1302	18.4664	20.7198	22.7032	25.3806	27.6343	28.3957	32.6829	34.5126	31.2278	30.8386	25.9808	25.9512	22.3246	21.81	18.6477	18.0394	15.1562	12.0386	9.05502	7.32724	3.63905	6.06137	8.25009	7.41858	8.98235	9.84827	13.9776	14.3743	19.5262	17.4177	24.1162	26.981	27.2356	30.3217
85	3.53436	5.82508	4.80966	5.16516	7.91699	7.61746	6.19678	11.4172	14.643	15.9504	12.4579	15.2538	15.0085	17.1464	17.7557	20.3132	22.6231	24.5029	27.2484	29.5059	30.4865	34.645	36.4037	33.2072	32.7727	28.1617	27.9898	24.3408	24.2367	21.2525	21.781	19.2075	17.1924	14.8296	14.0945	10.4199	12.7081	15.3435	14.5051	15.8168	14.9282	19.5276	18.5275	23.8161	20.9613	27.2382	29.7342	29.3274	32.3601
86	5.83803	7.57175	5.81268	7.00965	9.63879	6.87968	7.25547	13.2163	16.4383	16.729	12.7173	14.3973	14.8118	15.05	16.4748	17.8203	19.9874	21.395	24.0769	26.2014	27.5721	31.4247	33.033	30.0811	29.7002	25.6017	25.5323	22.0899	21.7469	19.756	21.0188	18.8755	17.8971	16.1113	16.0493	12.5078	15.2266	17.6712	16.6035	17.6563	15.9743	20.6192	18.481	23.6743	20.1845	25.9997	28.0807	26.9202	29.5035
87	6.48106	5.22752	3.6586	5.98295	7.64108	3.91148	3.64079	10.0145	12.7454	12.8259	8.79205	10.125	9.95289	10.4684	11.5098	13.5133	15.9385	17.9571	20.9164	23.5028	24.9587	29.1326	30.6435	27.1099	26.3379	22.0706	21.3654	17.673	17.7646	14.9181	16.0959	14.2444	13.3729	11.956	12.854	9.81005	12.9419	15.2777	14.2951	13.7447	11.3116	15.8401	13.5196	18.5285	15.4398	21.0716	23.405	22.5935	25.6205
88	8.52768	6.60458	5.14619	7.48257	8.73333	3.6218	7.02502	11.7496	14.9461	13.9715	10.2002	11.3185	12.7533	11.9911	14.2781	15.0417	17.6445	19.4888	22.6776	25.4806	27.7434	31.5477	32.6266	29.1063	27.9088	24.0715	23.0102	19.4135	17.8493	16.6467	17.8628	16.0855	16.3171	14.6899	15.9459	13.3602	16.0085	18.735	18.4045	17.5995	15.575	19.2141	17.258	21.0963	18.7683	23.3935	25.5882	23.6291	26.6573
89	9.69701	8.19233	7.23845	9.64509	11.2486	6.28345	8.87644	14.3098	17.2365	16.5117	12.2431	13.4199	14.5603	12.6479	14.6827	14.6249	16.8338	18.1028	21.0761	23.5725	25.9185	29.4553	30.5657	27.3867	26.1884	22.7582	22.0853	19.0199	18.4713	17.5045	19.1909	18.172	18.1752	16.7285	17.8818	15.259	18.2794	20.7166	19.9901	19.3002	16.9235	20.9388	18.2374	22.0089	19.037	23.4318	25.5271	23.5065	25.8027
90	11.0276	10.8363	8.83683	10.8106	12.6769	7.91139	8.33322	15.0914	17.2958	16.8262	12.2143	12.9418	13.2604	12.223	13.8219	14.6144	16.7153	18.1031	20.8712	23.114	24.9252	28.6312	30.0313	27.0102	26.4519	22.7631	22.2983	18.844	18.9012	17.0308	18.5867	17.2633	16.9839	15.7597	16.8534	14.3485	17.592	19.7387	18.222	17.694	15.1061	19.5306	16.7245	21.2261	17.9457	23.1035	25.1192	23.734	26.1337
91	10.7865	12.5312	10.1034	10.922	13.1283	10.7461	7.12532	14.4168	15.2023	15.3821	11.6065	12.0956	10.3275	10.9141	10.4645	11.7621	13.7734	14.6978	17.2535	19.3192	21.0226	24.7134	26.1736	23.2502	22.8966	19.1876	19.259	16.2777	16.9421	14.7535	16.004	14.918	13.4486	12.0182	12.9958	10.8507	13.9795	15.0043	12.6988	12.7787	9.43307	14.6341	11.8587	17.4256	13.3045	19.7085	21.8347	21.3123	23.1839
92	15.3374	16.6435	14.5077	15.875	18.1562	14.3648	12.6408	19.9971	21.5496	21.1601	16.5904	16.6116	15.5853	13.4843	13.4593	12.4736	12.9798	13.5924	15.777	17.0037	18.6615	21.7258	23.1942	21.0944	20.5958	18.0688	18.9788	17.1252	18.803	17.8299	19.6447	20.063	19.7743	18.7206	19.9915	17.7644	21.01	22.2241	19.6859	19.7747	15.6522	20.8151	16.8833	21.3088	16.662	21.533	23.0617	21.7841	22.719
93	15.9829	18.2961	15.5871	16.2938	18.4195	16.4036	11.7992	18.8327	19.0982	19.261	15.6459	15.5686	12.4007	12.1473	10.0826	10.5294	9.90916	11.3418	13.3503	14.5392	15.5236	19.1051	20.8731	18.5046	18.8521	14.8216	16.5471	14.316	15.7876	14.8244	16.1823	16.7445	15.884	15.1277	16.1966	14.5218	17.3805	17.4043	14.4276	15.1367	10.3645	15.8311	11.9819	17.1015	11.7515	17.8892	19.2642	19.5586	20.2564
94	19.7764	21.8492	19.6166	20.4286	22.7302	19.748	16.3441	23.7382	24.301	24.0566	19.9403	19.4245	16.7615	15.1271	13.471	12.7859	11.4089	12.542	14.2599	14.6183	15.1622	18.275	20.1285	18.9093	19.4147	15.4638	18.2266	16.7403	18.7328	18.2405	20.1754	21.1381	21.0437	20.2428	21.5739	20.0121	22.9969	23.1598	20.0861	20.6762	15.9499	21.2805	17.0858	21.3103	16.2104	20.8239	21.7673	21.5277	21.6792
95	19.7017	22.2566	19.3084	19.9089	21.8985	20.3022	15.1334	21.5786	20.9937	21.2516	18.2761	17.8313	13.9148	13.8656	10.5929	12.2581	9.9484	11.4282	12.3112	11.73	11.9873	14.8913	17.1065	16.0362	17.2946	13.1829	16.2141	13.4544	15.7864	15.0589	16.715	17.7209	16.7289	16.2944	17.3116	16.4537	18.8321	17.5963	14.0974	15.2523	10.6683	16.1252	12.4977	16.8886	11.4279	17.1879	18.1471	19.4014	19.6552
96	25.8161	28.2964	25.9413	26.5698	28.8413	26.3667	22.242	29.3372	29.2032	29.0643	25.4285	24.5609	20.8555	19.6436	16.4074	15.8961	12.46	13.4665	13.8655	12.3052	12.2959	14.1494	16.6098	16.8005	18.5034	14.1076	19.0591	17.5388	20.4353	20.7422	23.1241	24.6494	24.6923	24.4454	25.7376	24.7649	27.3758	26.1023	22.6482	23.8402	18.9948	24.0965	19.8724	23.2354	18.1064	21.6931	21.1161	22.8665	21.4691
97	26.403	28.6912	25.6801	26.5441	28.4356	26.1877	21.1778	27.799	26.6999	26.3915	22.9182	22.0856	17.6139	17.1402	12.958	13.7256	9.49491	11.7437	11.7524	11.3357	9.95631	12.4571	15.2238	14.9534	16.57	10.7879	15.5876	13.2483	16.4283	16.7458	19.0241	20.7365	20.9601	21.2943	22.6848	22.8066	25.0951	23.2407	19.5553	20.1962	15.3982	19.8218	15.6853	18.4305	13.5098	17.2942	17.1115	18.8573	18.0673
98	30.4657	33.2017	30.5268	31.117	33.2263	31.2999	26.4588	33.0278	32.1532	32.1305	28.7931	28.0416	23.6415	23.1374	18.9927	19.2658	14.7226	15.9351	15.4849	13.552	11.8357	14.3258	17.1106	17.1998	19.4245	14.5477	20.2326	18.3072	21.9683	22.6317	25.0019	26.7535	26.6962	26.9416	28.1254	27.8205	29.9796	27.7311	24.2521	25.432	20.8848	25.3856	21.5632	24.112	19.3855	22.5489	21.3546	23.6942	22.1036
99	31.4674	33.7431	30.5437	31.3707	33.1855	30.574	25.6565	32.0113	30.3107	29.4619	26.3453	25.6838	20.8663	20.6641	15.9255	16.793	11.0521	13.2803	12.1268	10.6495	8.00849	11.2053	13.9964	13.1429	15.4191	10.1973	16.0193	13.5236	17.6524	18.6116	21.0041	23.097	23.7176	24.5766	25.9663	26.6203	28.7493	26.0506	22.4338	22.9709	18.5623	21.8048	18.2172	19.4131	15.4235	17.6468	16.1161	18.7791	17.4267
100	35.6461	38.4601	35.5906	36.0607	38.111	36.2956	31.1705	37.3939	35.961	35.6657	32.7114	32.3297	27.5654	27.5686	22.9939	23.7542	18.2774	20.0085	18.8192	16.3316	13.0755	13.6639	18.1312	17.3092	21.2236	16.9276	22.8575	20.7646	24.9695	25.8927	28.147	30.0177	29.9092	30.5407	31.4932	31.6319	33.5878	30.4089	27.104	28.385	24.3117	28.0738	24.7721	26.405	22.3316	24.8621	22.8618	25.8231	24.0368
101	38.954	41.7791	38.9702	39.4738	41.5302	39.7225	34.6034	40.8842	39.4608	39.0828	36.1008	35.6335	30.8462	30.6552	25.9569	26.1174	20.4279	21.3884	19.6173	16.3259	12.5101	11.3983	16.5541	15.8717	20.4439	17.8217	23.6872	22.4581	26.9195	28.3905	30.9443	33.1821	33.3093	33.9989	35.0115	35.1567	37.1146	33.8953	30.6096	31.8656	27.7844	31.4423	28.0829	29.0323	25.4164	26.466	23.4165	26.8269	24.2758
102	37.629	40.1552	37.3604	38.1	40.1239	37.846	33.0225	39.6079	38.0286	36.8808	33.9393	33.1348	28.3159	27.7342	22.9912	22.6721	16.9389	17.5662	15.3122	12.1194	7.9388	7.42564	12.1358	11.4372	15.822	13.4283	19.2686	18.4696	23.0462	24.7961	27.425	29.9121	31.0931	32.2552	33.6338	34.2289	36.3005	33.2687	29.7818	30.4843	26.2441	28.6608	25.5216	25.2782	21.779	22.1981	19.0279	22.5095	19.816
103	34.9128	37.3357	34.472	35.2747	37.254	34.899	30.0616	36.6724	35.4065	34.8054	31.4285	30.5259	25.8602	25.0275	20.5093	20.001	14.8678	15.0506	13.7	10.3385	7.53544	8.24557	11.8638	12.3655	15.55	12.6005	18.406	17.6088	21.7942	23.3217	26.094	28.35	29.1617	29.8231	31.2239	31.5336	33.7021	31.2471	27.6598	28.4027	23.8305	27.4382	23.6271	24.7771	20.701	21.9044	19.3472	22.257	19.7097
104	32.4689	34.6222	31.811	32.7458	34.7326	31.8987	27.4933	34.3251	33.294	32.6618	28.9931	27.7526	23.3101	21.9555	17.6685	16.6275	11.6492	11.4277	10.4195	7.13523	6.32112	8.05223	10.7125	11.1302	13.2831	10.1102	15.5917	15.2876	19.1366	20.7407	23.6707	26.0082	27.2235	27.768	29.3405	29.6047	31.994	30.1784	26.4734	26.9114	22.0635	25.737	21.6177	22.8904	18.4938	19.6089	17.3489	19.8704	17.2803
105	28.8476	31.0378	28.3654	29.2386	31.3155	28.4588	23.6885	30.288	28.8003	27.7624	24.357	23.3418	18.6271	17.7571	13.1272	13.2857	7.66993	9.56343	8.37025	6.82106	4.18379	7.9643	10.6	9.19971	11.4602	6.14251	11.9621	10.0368	14.4543	15.697	18.4062	20.7844	22.1578	23.0609	24.689	25.4853	27.7563	25.777	22.0201	22.0892	17.3775	20.2092	16.4192	17.1282	13.0918	14.1979	11.9621	14.8522	13.1211
106	27.611	29.3879	26.7705	27.8334	29.858	26.4183	22.6979	29.9014	29.4389	28.6106	24.757	23.1018	19.293	16.9864	13.5347	11.4191	7.47144	7.10184	7.75583	7.15653	7.83455	10.3846	12.6827	11.4452	12.5092	9.29365	13.2589	13.2065	15.8461	17.0627	20.123	22.3996	23.9807	24.2979	26.0156	25.8603	28.6285	27.9339	24.245	24.3544	19.2793	23.2573	18.7668	20.3874	15.6703	17.2057	16.3535	17.2023	15.8156
107	23.8858	25.6777	23.0679	24.084	26.078	22.9425	18.89	26.0067	25.5374	24.9301	21.1977	19.931	16.1207	14.2953	10.8745	9.80407	6.11795	7.58425	8.2739	9.0016	8.69698	12.6057	14.7222	12.5089	13.6114	8.76419	12.7846	11.5608	14.2093	14.9207	17.6803	19.5876	20.5193	20.4865	22.0891	21.7746	24.5144	23.8382	20.2074	20.4433	15.3875	20.0616	15.4664	17.8703	12.8484	15.566	15.437	16.4799	15.5915
108	22.2364	23.3663	20.9979	22.2721	24.1984	20.1077	17.2049	24.5562	24.6512	23.5918	19.2535	17.8327	15.0166	11.9219	10.153	7.24394	6.88651	7.20222	9.37238	10.5431	11.8675	15.11	16.7319	14.5796	14.8189	11.5878	12.7122	11.577	13.8009	14.1297	16.8021	18.6005	20.083	20.1385	21.9558	21.4546	24.5256	24.8551	21.6475	21.1858	16.3756	20.3614	15.8974	18.0148	13.5778	16.0814	17.093	15.8192	16.4212
109	18.6238	19.7173	17.391	18.626	20.6157	16.4973	13.967	21.4045	21.8442	20.7898	16.258	15.1942	13.1184	10.234	9.20482	7.21733	8.10638	9.10176	11.3344	12.9358	14.6578	18.151	19.6183	16.9524	16.9349	13.5246	13.9256	11.8123	13.8026	13.544	15.7465	17.0854	18.2188	17.824	19.5911	18.7177	21.9138	22.8135	19.988	19.2064	14.7203	18.729	14.361	17.2554	12.8024	16.3886	17.7943	16.591	17.8396
110	16.9558	17.4217	14.8104	16.3696	17.8776	13.4652	11.2286	18.4302	18.7643	17.392	12.7674	11.573	10.2074	7.04453	7.97519	7.2087	9.33635	10.2736	12.8948	15.1522	17.3598	20.9329	22.1549	19.0385	18.479	14.897	14.9163	11.6812	12.8552	11.5432	13.5863	14.2814	15.2078	14.8966	16.8589	16.3869	19.5941	20.8741	18.3453	16.8328	13.1341	16.325	12.6529	15.7253	12.1106	16.2066	18.1868	16.5705	18.7511
111	12.9927	13.4104	10.946	12.427	14.1885	9.81366	7.0271	14.3196	14.7322	14.0602	9.70732	9.50907	8.32744	7.61878	8.0465	9.3184	11.0592	12.6643	15.3505	17.7315	19.0488	23.2243	24.8011	21.3733	20.875	16.4636	16.4732	13.1618	14.1296	11.9449	13.4774	12.6619	12.1762	11.246	12.7603	11.6526	14.8629	16.2424	13.9885	12.8328	9.59937	13.94	10.6243	15.569	11.6352	17.2422	19.0354	18.555	20.7241
112	13.4322	12.8901	10.2869	12.2788	12.6363	7.9526	7.52358	13.5916	14.5922	12.9303	8.0749	7.52414	8.19157	6.78729	9.07374	9.84045	12.0725	13.1569	16.2624	19.0659	22.052	25.3566	25.8727	22.6274	20.8039	17.6299	16.4904	14.2349	12.9604	11.461	12.8532	11.791	12.6766	12.039	13.9766	13.4296	16.5338	18.4418	16.8984	14.9216	12.1617	14.9107	12.7701	15.9911	13.8242	18.2007	20.4369	18.0492	20.1898
113	10.1885	8.53491	5.6241	7.58924	7.08816	3.77869	3.73039	7.551	9.24541	7.90125	3.82551	5.79072	8.03582	8.93893	11.1791	12.2836	15.1679	17.3379	20.63	23.6422	25.8939	29.8387	30.728	27.0787	25.6996	21.8054	20.1916	16.6546	13.8686	13.2547	13.7498	10.5821	10.5397	8.70677	10.2302	8.87618	11.5683	13.8809	13.8865	12.1723	10.8761	14.011	13.5692	17.0694	15.984	20.2579	22.6004	20.1435	23.7133
114	16.0924	14.0099	11.8873	14.0871	13.1675	8.67798	9.8103	14.0042	15.0708	11.9019	8.43302	7.53451	9.00027	5.4873	8.99042	7.76939	11.0411	12.7778	16.1067	19.312	22.3637	25.8243	25.8991	22.4933	20.6717	16.9654	15.2893	12.6154	9.23576	10.8595	11.9114	11.4558	13.0553	13.2164	15.3801	15.2205	18.0078	20.0478	19.3265	16.7737	14.4514	15.8712	14.8362	15.7089	14.5533	16.5395	18.7882	15.4631	18.6896
115	15.4659	12.306	10.7326	12.5302	10.8053	7.26807	9.86373	11.5661	13.2459	10.4641	7.43404	7.75081	9.87303	9.67871	12.8352	13.3614	17.2052	19.5211	22.9201	26.2618	29.0777	32.7767	32.796	29.2727	27.2453	23.5055	21.3178	18.1063	13.6398	14.3284	14.5166	12.333	13.2915	12.729	14.7289	14.5463	16.9072	19.1	19.3373	16.697	15.1739	16.6537	16.4348	18.5801	18.3411	21.3371	23.6314	20.5717	24.5846
116	15.8152	12.9459	10.7149	11.5159	9.86612	6.50054	8.53005	8.84373	9.80249	6.6549	4.09461	3.70824	6.54207	8.18192	11.455	13.2147	17.2714	20.1792	23.5555	26.9886	29.2147	33.3317	33.4509	29.7364	27.4497	23.7617	21.0668	17.4624	11.0543	12.1887	11.0778	8.74497	9.40458	9.02868	11.1676	11.9801	14.0411	15.9487	16.2165	13.2067	12.1123	12.9978	13.3107	15.7503	16.0961	18.5463	21.7486	18.9308	23.6394
117	15.8001	13.8224	11.243	12.7875	11.7349	8.29809	8.14354	11.0608	11.6488	8.58804	4.93973	3.55514	3.97329	3.71067	6.74356	9.20923	12.7418	15.824	19.1348	22.6326	24.8112	28.9311	29.0423	25.1926	23.1418	19.3414	16.6761	12.8428	8.36108	7.55496	7.81835	6.51871	8.4104	9.01322	11.7185	12.482	15.0171	16.8049	16.0492	13.1221	11.0041	10.82	10.2874	11.7531	11.9427	14.6945	17.4433	15.2524	19.7569
118	12.4141	11.9823	8.66875	10.5274	10.9014	7.46788	4.41047	10.4961	10.2138	8.613	3.9758	2.96562	3.29105	2.95544	5.44093	7.91602	11.2178	14.2484	17.5062	20.809	22.5766	26.933	27.5926	23.6556	22.0309	18.116	15.7923	11.8149	10.1592	7.20826	8.11979	7.00206	8.06729	7.2929	9.22921	9.14779	12.1559	13.8647	12.3501	10.2625	7.2693	10.0867	8.45749	11.3917	10.0155	14.1768	16.8779	15.5054	19.5556
119	16.2633	15.3836	12.319	14.1372	14.0706	10.5112	8.31382	13.8665	13.678	11.7101	7.12216	5.59333	5.56564	3.10376	5.23259	5.4246	8.41339	10.9049	14.3149	17.6908	20.1571	24.1366	24.3867	20.6829	18.8846	15.008	13.2624	9.65497	8.1895	7.69143	9.5672	9.25717	10.3713	10.0405	12.4554	12.9421	15.8312	17.4295	15.6833	13.1277	10.206	12.2902	9.87918	12.4694	10.1183	13.6118	15.8259	13.4869	16.8422
120	18.1781	18.0832	14.8474	16.6611	17.0185	13.4997	10.3656	16.5842	15.9829	14.2145	9.97075	8.07123	6.17858	2.94915	3.42489	2.95258	5.14425	7.6629	10.9011	14.0997	15.3196	19.7881	21.068	17.2143	15.8776	11.9351	10.5883	7.00644	8.02647	7.22527	9.29895	10.0594	11.1691	11.3409	13.8131	14.519	17.4304	17.9811	14.8473	13.4132	9.03484	12.2531	8.17227	11.1966	7.06493	11.3735	13.3899	12.1458	14.7615
121	20.0791	20.2599	17.2146	19.0146	19.7168	15.6684	13.0322	19.6345	19.2759	17.2369	13.1895	10.8501	9.1846	4.06701	5.58453	3.45167	5.72037	6.54967	9.58496	12.4163	15.0043	18.6733	19.5461	15.9963	14.9752	11.2232	10.5917	8.19055	6.93119	9.23699	10.4261	12.5282	14.2151	14.6057	17.0339	17.4888	20.4872	21.3911	18.6306	16.7771	12.9231	15.0996	11.4343	13.415	10.0429	12.7668	14.6817	11.3732	13.9328
122	21.9667	23.3095	20.2835	21.6098	22.9792	18.9376	15.8555	22.5994	21.6195	20.1466	16.3018	14.2936	10.5935	7.84817	4.89957	2.80578	3.26676	2.93257	5.5354	8.34971	11.1297	14.6949	15.4831	11.9052	11.0702	7.45693	7.8728	6.95686	8.99144	8.95871	11.6547	13.6872	15.4281	16.196	18.4738	19.1595	22.0078	21.7758	18.309	17.4486	12.68	15.3925	10.989	12.6481	8.20171	11.273	12.4135	10.892	11.6893
123	25.1261	25.9512	23.1254	24.6499	26.0282	21.923	18.9386	25.9169	25.3884	23.8714	19.7627	17.7853	14.5932	11.3386	8.96183	5.39235	4.19203	3.30455	5.51247	6.66935	8.9028	12.2153	13.4992	10.7083	10.6787	7.98609	9.37276	9.17559	11.4245	12.3003	15.3349	17.5815	19.5021	20.235	22.4888	22.9126	25.8435	25.9219	22.5512	21.58	16.7732	19.5813	15.2418	16.3011	12.1901	13.5729	13.8464	12.863	12.8326
124	27.9842	29.0761	26.1609	27.6055	29.0742	25.2044	21.7978	28.7064	27.45	26.219	22.5064	20.4929	16.5956	13.9611	10.4887	7.68461	3.73307	2.83089	3.22715	3.02044	3.6093	7.84671	9.47713	7.05199	7.69945	4.40729	8.93179	8.60808	11.7853	13.3282	16.4625	18.9736	20.7143	21.7104	23.5956	24.5775	27.0248	25.6876	21.8835	21.4985	16.5976	19.341	15.1969	16.0018	11.5782	12.8831	11.7662	13.0057	11.3203
125	30.3515	31.7503	28.9321	30.2287	32.0037	28.2004	24.6202	31.6249	30.7707	29.5269	25.6817	23.7885	19.8461	17.3537	13.688	11.1842	6.84157	4.96631	5.39834	3.36388	4.74341	6.72732	8.80336	8.03926	7.11869	7.22543	10.996	11.8242	14.7406	16.5066	19.8119	22.4342	24.3814	25.2902	27.2916	27.8177	30.5347	29.7754	26.0085	25.6224	20.6033	23.5386	19.2409	19.8547	15.5886	15.8215	14.2779	15.2636	13.4495
126	33.3298	34.8971	32.0009	33.2463	35.04	31.44	27.5745	34.4497	33.331	32.1157	28.2735	26.5837	22.3412	20.1857	16.1171	14.0688	9.26231	8.0059	6.428	2.89767	3.78264	3.70287	6.10064	7.36934	9.33966	6.95531	12.0206	12.8408	16.4368	18.5061	21.8302	24.5994	26.5893	27.6605	29.6018	30.3403	32.9006	31.6345	27.8359	27.5744	22.64	25.3067	21.2189	21.3721	17.2684	16.9629	14.4195	16.6742	13.7405
127	34.4137	36.2484	33.8487	34.8511	36.9673	33.3635	29.9059	36.8394	35.7918	34.8019	31.0155	29.4676	25.1427	23.221	19.0631	17.2898	12.4084	11.358	9.67612	5.6909	5.35457	5.86748	8.32979	9.69677	11.6989	9.79149	15.1917	15.8001	19.6228	21.6123	24.8458	27.5238	29.3328	30.1932	31.9537	32.4632	34.9628	33.4043	29.6397	29.7166	24.8064	27.8417	23.765	24.1607	20.0591	19.9922	17.1687	19.777	16.6465
128	38.0195	40.23	37.6978	38.5862	40.707	37.4476	33.3906	40.3016	39.1997	38.1918	34.4865	33.0088	28.6049	26.7742	22.5336	20.8096	15.8995	14.7106	12.5644	8.39971	6.97451	5.45704	8.70974	10.7535	13.4055	12.4458	17.9316	18.749	22.7531	24.8886	28.1208	30.8546	32.6718	33.5554	35.2688	35.7878	38.2136	36.391	32.6586	32.8674	28.0325	30.9882	27.0358	27.1783	23.2313	22.8637	19.5175	22.4202	18.9753
129	34.6715	36.7417	33.6626	34.6921	36.4919	33.7157	28.9322	35.5331	33.9878	32.8905	29.5131	28.4494	23.7258	22.7061	18.0373	17.3654	12.0088	12.0921	10.2843	7.14764	3.67002	3.14794	8.35628	8.12647	11.7552	8.9579	14.8167	14.3682	18.6249	20.3894	23.2807	25.8088	27.2763	28.1946	29.7945	30.5979	32.8261	30.5052	26.8099	27.0593	22.4426	25.2604	21.5439	21.8771	18.0333	18.6087	15.7625	18.7184	16.0053
130	41.4423	43.5325	40.4515	41.4879	43.2756	40.3902	35.6592	42.1949	40.1888	38.4909	35.4849	34.3739	29.6637	28.5791	23.9648	23.3015	17.6443	17.8652	15.1439	11.7902	7.68812	5.11498	10.4989	8.57085	14.2747	13.0246	18.4341	18.3216	22.8656	25.1397	28.0138	30.8427	32.7036	34.1752	35.8167	37.0937	39.2278	36.3374	32.7579	32.7999	28.59	30.1503	26.8698	25.8625	22.3442	21.735	17.7651	21.4185	18.3091
131	44.0331	45.9504	42.743	43.8909	45.3397	41.9926	37.5715	43.746	41.3781	39.2598	36.4628	35.2856	30.6754	29.5023	25.0596	24.299	18.8048	18.8843	15.5066	12.2609	8.69435	3.27771	8.1704	6.41146	12.6083	13.7299	18.4612	18.6069	23.0417	25.5353	28.3405	31.3025	33.3681	35.1664	36.992	38.6444	40.7393	37.7394	34.2121	33.9584	29.9786	30.6962	27.2166	25.9063	22.5372	21.3535	17.0911	20.8556	17.7171
132	44.6584	46.7352	43.372	44.3099	45.9469	42.7687	38.1498	44.2509	41.8825	40.0581	37.3975	36.491	31.7546	30.9437	26.3962	25.7462	20.1286	20.6634	17.5954	14.8259	10.5652	7.4145	12.4023	9.42919	15.9035	15.2714	20.2855	20.2874	24.7926	27.1728	29.8636	32.5879	34.3192	35.8686	37.3674	38.7563	40.7661	37.3791	33.9631	34.0876	30.2496	31.4086	28.0609	27.2514	23.8956	23.2452	19.1043	22.8574	19.7297
133	41.8341	43.9893	40.6121	41.4573	43.1721	40.06	35.3819	41.4199	38.9972	37.1734	34.6043	33.7958	29.047	28.5442	23.9179	24.0486	18.1342	19.8825	17.3212	15.1176	10.4864	8.73945	13.5738	10.8128	16.615	14.3769	19.4226	18.2369	22.8067	24.7653	27.2271	29.8497	31.4341	32.9908	34.454	35.7993	37.7816	34.3218	30.9262	31.1285	27.3695	28.4918	25.1739	24.5275	21.2048	21.0979	17.7031	21.4135	19.0714
134	39.0756	41.1289	37.6092	38.2675	39.9567	36.7615	32.1925	37.9894	35.3998	33.5974	31.1835	30.5446	25.79	25.6542	21.0447	21.7546	15.7828	18.4586	16.391	14.6328	10.0378	10.9941	14.8741	12.0562	16.5286	13.07	17.926	15.8122	20.3105	21.9126	24.1199	26.5525	27.8333	29.4193	30.8122	32.2952	34.2216	30.6521	27.302	27.4035	23.8212	24.8778	21.6278	21.287	18.0513	18.5752	15.9134	19.4388	17.8024
135	35.9065	38.0211	34.6439	35.5861	37.2416	34.0519	29.451	35.704	33.5709	31.9263	28.9504	27.9638	23.2007	22.4455	17.7426	17.7529	11.7884	13.7333	11.611	9.92217	5.55067	8.35339	11.199	8.80266	12.5004	8.69284	14.186	12.7257	17.3181	19.1582	21.8587	24.507	26.1978	27.5739	29.1875	30.2817	32.3508	29.2817	25.7395	26.013	21.8998	23.6572	20.4435	19.7637	16.2164	16.1373	12.8706	16.5122	14.4295
136	39.0845	40.6806	37.3335	38.6215	39.9032	36.5453	32.1894	38.53	36.4178	34.4022	31.2896	29.935	25.3684	23.9041	19.4742	18.4438	13.0361	13.3321	10.3616	8.06403	3.98331	3.65778	7.25409	4.69651	9.40575	7.8863	13.1026	13.335	17.7797	20.2806	23.315	26.3323	28.4948	30.214	32.0443	33.5796	35.6713	32.6944	29.1426	28.9798	24.952	26.0516	22.5741	21.3979	17.8728	16.7612	12.6118	16.1926	13.0022
137	41.7693	43.5704	40.0633	40.9566	42.4312	39.0661	34.6575	40.4609	37.7583	35.4611	33.1339	32.2685	27.6689	26.8994	22.4168	22.242	16.5251	18.0037	15.3565	13.4393	9.14218	9.33573	12.4511	8.66687	14.1426	12.2955	16.9566	16.129	20.6297	22.8277	25.1407	27.8563	29.6839	31.5672	33.2433	35.0638	37.0725	33.6213	30.2831	29.967	26.498	26.607	23.0264	22.15	18.8896	18.484	15.044	18.8081	16.3374
138	38.7461	40.0056	36.3994	37.1631	38.383	34.7488	30.7615	36.0863	33.5289	30.8619	28.4421	27.326	22.9117	22.0338	17.9392	17.9121	12.7195	14.8211	12.8625	12.3401	9.47722	10.5562	11.8852	8.03408	11.0685	9.27129	12.2238	10.981	15.1747	17.4277	19.8404	22.7671	24.9414	27.1295	29.2034	31.2374	33.4066	30.3085	26.9315	26.1535	22.7418	22.1604	18.4524	16.9987	13.5701	12.7563	9.37098	13.0506	11.4169
139	40.1847	42.2616	38.6469	38.9499	40.7235	37.5327	33.0848	38.408	35.4589	33.5396	31.6211	31.1653	26.52	26.515	22.09	22.9531	17.1589	20.012	18.0321	16.8157	12.6063	13.1627	16.954	13.2454	17.6317	14.49	18.5265	16.4665	20.7889	22.3897	24.3727	26.7862	27.8341	29.5906	30.7888	32.4137	34.0351	30.0511	26.9812	27.1384	24.0187	24.6651	21.3949	21.1905	18.1946	18.5306	15.9934	19.5119	18.1771
140	35.5058	37.6953	34.1827	34.701	36.5194	33.4652	28.8002	34.4873	31.9547	30.0717	28.1198	27.7325	22.9434	23.3058	18.6803	20.1073	14.1827	17.786	16.0653	15.483	11.4734	14.2602	17.1546	14.5129	17.6637	12.7199	17.5828	14.7064	18.9977	20.0231	21.6401	23.641	24.4444	26.0767	27.3266	28.5892	30.4707	26.7651	23.4693	23.816	20.2974	21.1492	17.8514	18.1705	15.5793	16.9382	15.2285	18.759	18.1975
141	35.3135	37.211	33.5891	33.5337	35.3478	32.1982	27.9297	32.6627	29.5484	27.6919	26.1602	26.1986	21.7235	22.9072	18.7504	21.2521	16.0441	20.5826	19.2918	19.8415	16.4831	18.9841	21.7475	18.3604	20.4461	15.6228	18.3978	15.3998	18.5287	18.9048	20.3092	21.8524	22.0486	23.8449	24.8574	26.5401	27.9329	23.8658	20.959	21.0175	17.9017	18.8659	15.9393	16.8801	14.0618	16.5359	15.8255	19.1734	19.5822
142	32.4355	33.2054	29.5827	29.3844	30.445	27.0246	23.6488	27.1073	24.0566	21.0776	19.9144	19.7327	15.8641	17.0347	13.6017	16.5434	13.4396	17.6971	17.322	18.4677	16.3851	20.0392	21.2847	17.747	17.7537	13.2462	13.7123	10.6483	11.6373	12.1336	12.6287	14.5454	15.7799	18.0179	19.686	22.0935	24.1443	20.2043	17.8989	16.2482	12.6628	12.1171	8.48057	8.66774	7.17564	9.32587	10.1826	13.5042	15.4481
143	31.7533	33.6932	30.1169	29.7842	31.7144	28.7584	24.5382	28.8865	25.74	24.2471	22.9838	23.4302	19.0639	20.7835	16.3246	19.9662	15.2278	20.1633	19.3473	20.2504	17.2965	21.1532	23.3645	20.5459	21.4139	15.8534	18.4727	15.0006	17.4566	17.2589	18.2003	19.2661	18.6599	20.2897	21.039	22.5671	23.6314	19.4722	16.7192	16.9311	14.1571	15.5497	13.5366	15.057	12.1941	15.6636	16.0442	19.1621	20.265
144	25.9894	28.4295	24.9292	24.8811	26.8474	24.4466	19.7268	24.7382	22.3574	21.5657	19.9811	20.5143	16.1113	17.9377	13.3411	17.0161	12.4943	17.3608	16.944	17.996	15.4269	19.7319	22.1432	19.357	20.2679	14.1984	17.3098	13.4996	16.1806	15.5129	16.6951	17.4354	16.0647	17.0537	17.4115	18.296	19.8379	15.9083	12.8051	13.8555	11.0844	13.645	12.2075	14.1332	10.3246	15.1999	16.1182	18.8432	19.7813
145	27.1381	29.7849	26.403	25.9474	27.9835	25.9998	21.444	25.7505	23.2507	22.5292	21.7701	22.7272	18.6624	21.2916	16.5593	21.2972	17.7464	22.5289	22.2074	23.1794	20.2877	24.2888	26.7189	24.146	25.0913	19.18	22.0382	17.9997	20.2791	19.3048	19.7155	19.8969	17.7462	18.4757	17.8929	18.6088	19.7037	15.5915	12.9995	14.5421	12.9524	15.3317	14.8064	17.5353	13.9437	19.1372	20.2242	23.1461	24.2638
146	25.6883	28.6583	25.582	24.1835	26.6728	25.574	21.3106	24.6415	22.4498	21.9908	22.312	23.5961	19.8757	22.8692	18.1906	23.2538	20.0047	24.7477	24.701	25.7754	23.0864	27.1931	29.6973	27.119	28.0226	21.954	24.6251	20.3446	22.3418	21.1185	21.1581	21.0571	18.3148	18.7711	16.7347	16.7233	17.2077	13.422	11.8656	13.9042	13.6752	16.0117	16.1793	18.985	15.7425	21.5105	22.9839	25.8704	27.2094
147	22.7783	25.9311	22.9861	21.9868	24.4049	23.5052	18.9251	23.0563	21.5098	21.6952	21.1745	22.4359	18.8888	21.4495	16.8217	21.1759	17.249	21.8446	21.4708	22.2473	19.3945	23.3458	25.954	23.7518	25.0134	18.9705	22.4043	18.5111	21.0695	19.915	20.8462	21.0255	17.9133	17.6888	16.0165	15.5195	16.7945	13.4576	11.2291	13.5052	12.4857	16.2458	15.5862	18.8426	14.7146	20.4769	21.5259	24.1378	24.8303
148	21.9864	25.4405	22.8487	21.5848	24.4569	24.0194	19.346	23.9163	22.8108	23.288	22.7078	23.5779	20.195	22.298	18.5293	22.8121	19.9392	23.5654	23.9544	24.6577	22.6685	26.6121	29.2962	27.3228	28.6059	22.5126	25.8284	22.1278	24.3108	22.8442	23.5549	23.0113	20.0202	19.4647	17.2996	16.1069	16.9662	14.251	12.8461	15.0727	14.17	18.421	17.7028	22.0286	18.1149	24.5332	26.0782	28.2864	28.9487
149	18.3924	21.734	19.202	18.5809	21.1983	20.7372	15.8978	21.2394	20.6407	21.4937	19.6709	20.2786	16.8643	18.7645	15.1732	19.4064	17.347	20.9968	21.728	22.9285	21.3203	25.5874	28.1199	25.6477	26.5373	20.5431	23.1313	19.3145	21.1527	19.6771	20.6226	20.0076	17.2852	16.6716	15.8001	14.9684	17.0759	14.4885	11.6473	13.7354	11.1881	16.2345	14.6552	19.647	15.1693	21.9493	23.608	25.6232	26.6009
150	19.0316	22.3881	20.8295	19.5343	22.8081	23.2291	18.6361	23.7636	23.7999	25.1309	23.1619	23.8818	20.8642	22.4018	19.3279	22.4562	20.7544	23.2883	24.2994	24.822	23.7825	27.4482	30.0108	28.3357	29.6069	23.7178	26.8676	23.4304	25.3743	24.0026	25.011	24.2942	21.5166	20.5382	19.1585	17.5392	19.6113	17.6622	15.3882	17.431	15.5176	20.7282	19.1492	24.3126	19.6562	26.3847	27.8573	29.6712	30.2458
151	14.3025	17.7415	15.9158	14.6215	17.7927	18.2741	13.8915	18.7676	19.5111	21.1849	18.7542	20.111	17.6183	19.6902	17.5244	21.2571	20.7086	23.494	24.7919	25.9877	25.1139	29.1347	31.5595	29.3088	30.1155	24.5367	26.6881	23.1712	24.2115	22.5353	23.0443	21.6002	18.7869	17.167	15.652	13.4468	15.5805	15.0274	12.9059	14.6927	13.414	18.7964	17.4778	23.1035	18.8592	25.934	27.8963	29.4532	30.5504
152	16.4228	19.4667	18.9272	18.0811	21.463	21.5402	18.2638	23.7329	25.0129	26.6018	23.8778	24.9856	22.7135	23.5996	21.9816	23.8239	23.0502	25.0916	26.1614	26.0462	25.3496	28.528	31.0861	29.9864	31.4303	26.0721	29.7138	26.7966	28.2838	26.9699	27.9037	26.8916	24.3641	22.7643	21.4381	19.0541	21.1462	20.7757	18.7157	20.5247	18.791	24.3578	22.4885	28.0949	23.3076	30.0883	31.606	32.7229	33.0012
153	15.432	18.4284	18.6676	17.6304	21.276	21.6223	18.8486	24.2192	26.3027	27.8829	24.7736	26.206	24.4784	25.2242	24.1793	25.6551	25.064	26.8301	28.4861	28.9525	28.9697	32.082	34.3734	33.0238	33.9394	29.2206	31.8668	29.2447	30.4923	28.9832	30.0714	28.8882	26.4856	24.6374	23.3043	20.58	22.5859	22.8478	20.8736	22.7704	21.2537	26.8099	24.9188	30.6161	25.8851	32.6095	34.1523	34.7752	35.4829
154	16.3951	18.9812	18.9215	18.8023	22.0791	21.3937	19.3887	25.154	27.3459	28.6319	25.2792	26.4585	24.8721	24.533	23.714	23.3405	22.5015	23.5843	25.3	25.2977	25.8877	28.5666	30.6227	29.6677	30.2324	26.5567	29.3156	27.4627	29.3691	28.4586	29.9121	29.4516	27.4625	25.6078	24.8809	21.8393	24.1835	24.8745	22.7942	24.5153	22.3683	28.0114	25.5787	31.1412	26.0203	31.5226	32.6669	32.4569	32.8197
155	14.1636	16.6322	17.6231	16.8297	20.8472	21.6786	20.3585	25.0553	28.0902	29.9715	26.615	28.2758	26.9769	26.9419	26.652	26.938	26.7215	28.1165	29.9677	30.3904	30.8197	33.76	35.8397	34.5942	35.163	31.1188	33.4672	31.079	32.5973	31.0726	32.4956	31.5915	29.6946	27.8113	26.6025	23.094	24.3542	26.6709	25.0416	26.9655	24.9206	30.5087	28.0999	33.7581	28.897	35.1085	36.5232	36.304	37.1442
156	18.6803	21.0161	21.2214	21.8411	24.8053	23.5616	22.5954	28.5315	31.213	32.2628	28.3122	29.2947	28.3406	27.2937	27.3084	26.5308	26.4707	27.2444	29.2356	29.4233	30.417	32.9069	34.7293	33.7812	33.4793	30.919	32.9848	31.0291	32.8293	31.6457	33.3156	32.8662	31.5434	29.7581	29.3038	26.0072	28.5081	29.6892	27.6294	29.2772	26.8873	32.4886	29.6541	34.9507	30.1032	35.3706	36.6953	35.9213	36.6779
157	16.1732	18.1118	17.6167	18.7493	21.4712	19.3967	18.5496	24.9708	27.5792	28.1198	23.9982	24.887	24.1086	22.9191	23.278	22.4987	22.9114	23.6822	25.5308	25.3633	26.3612	28.7038	30.5723	29.8363	29.7648	27.1633	29.3029	27.0757	28.7438	27.3882	29.1103	28.5765	27.4754	25.8852	26.1172	22.8611	25.7353	27.3126	25.1531	26.446	23.3945	28.8139	25.7436	30.899	26.2809	31.4939	32.9853	32.0084	33.1096
158	12.3512	13.8713	13.9246	15.4231	18.0454	16.4032	15.6778	21.861	24.6691	25.4405	21.5459	22.783	22.0731	21.6539	22.0422	22.2422	23.1475	24.4973	26.5994	27.8153	28.7306	31.9732	33.7692	31.8479	31.781	28.2476	29.3951	26.6635	28.0402	26.1555	27.7581	26.5882	25.2029	23.4443	23.3103	19.9149	22.7017	24.5242	22.4769	23.8728	21.4354	26.7273	24.1133	29.6189	25.1333	30.9516	32.6319	31.8141	33.3456
159	13.789	16.2236	15.5665	16.2637	19.0346	17.7423	15.9392	22.204	24.5837	25.4436	21.6603	22.7425	21.5934	21.2639	21.2128	21.5414	21.8973	23.4185	25.4679	26.4961	26.8446	30.1809	32.2233	30.4516	30.8808	26.6399	28.4185	25.7726	27.197	25.5301	27.0407	26.1769	24.5857	22.812	22.5363	19.3854	22.0195	23.0731	20.914	22.4247	19.8841	25.4662	22.8741	28.5054	23.7045	29.9133	31.4447	31.0199	32.2559
160	12.649	15.6151	14.4079	14.1662	16.9793	16.5796	12.959	18.9981	20.5672	21.7261	18.5101	19.6028	17.7521	18.5579	17.5899	19.6279	19.2831	20.9032	22.597	23.179	23.3434	26.5768	28.7333	27.2123	28.0393	23.5164	25.9748	23.1201	23.9887	22.2491	23.4011	22.2611	20.1831	18.3752	17.9211	15.0812	17.6169	18.2083	15.9845	17.4952	15.1528	20.751	18.5351	24.2573	19.6654	26.3578	28.1218	28.6409	29.7095
161	17.5515	20.4129	19.4027	19.2857	22.2412	21.5152	18.2072	24.4423	25.6608	26.8806	23.5619	24.3044	22.051	22.1125	20.4463	21.4844	20.0373	22.0315	23.3535	23.6737	23.2954	26.6168	28.7791	27.6153	28.7747	23.666	26.8693	24.4296	26.2219	25.2139	26.4442	26.2913	24.2512	22.8514	22.1796	20.0282	22.2272	21.8203	19.5028	21.1371	18.463	24.1836	21.518	26.9799	21.7328	28.0872	29.2446	30.0336	30.2839
162	16.9174	20.0839	18.3237	18.0017	20.7464	20.2217	15.8546	22.014	22.7859	23.8239	20.7672	21.3445	18.6674	19.3242	16.8931	19.1399	17.5131	19.7518	20.7155	20.7226	20.0247	23.3673	25.8871	24.5873	25.9917	20.6595	23.9215	20.9353	22.8072	21.6424	22.8303	22.6532	20.4599	19.4297	19.0756	17.2961	19.6317	18.6429	15.8525	17.6241	14.3931	20.0414	17.5228	22.8827	17.7481	24.3132	25.6424	27.0499	27.4131
163	21.3598	24.6034	22.7875	22.2012	25.063	24.7068	19.9749	25.9109	25.9247	27.1394	24.4469	24.7243	21.6088	22.1534	19.5648	21.2775	18.9482	21.2234	21.909	21.7836	20.6732	24.042	26.6859	25.444	27.0473	21.3916	25.4197	22.5243	25.0128	24.0167	25.3955	25.3862	22.951	22.1979	21.3735	20.0443	22.2235	20.0787	17.4784	19.5285	16.7554	22.0343	19.8745	24.8516	19.7433	25.9109	26.865	28.4779	28.4291
164	21.3393	24.3844	21.6702	21.7863	23.9915	22.9835	17.8506	23.8177	23.0492	23.6349	20.8459	20.8076	16.8556	17.7933	14.3291	16.9543	14.1245	17.3363	17.8744	18.7749	17.0997	21.1868	23.7768	21.6086	22.7923	16.8268	20.233	17.023	19.4842	18.4783	19.9056	20.4754	18.6453	18.3792	18.6934	18.2814	20.2702	18.0648	14.7484	16.4825	12.4072	17.5523	14.7126	19.4148	14.142	20.2921	21.3718	23.0975	23.4228
165	26.563	29.8838	27.26	26.7734	29.33	28.5099	23.4527	28.8472	27.4635	27.66	25.8379	26.3545	22.0964	23.5514	19.4808	22.1925	17.8754	21.3123	21.0674	20.8565	18.5227	22.001	24.7843	23.414	25.2193	19.1809	23.693	20.5775	23.6749	22.8592	24.3375	24.7551	22.7215	22.8457	22.3343	22.0444	23.791	20.413	17.6258	19.749	16.7991	20.9099	19.0292	22.7935	18.1476	23.4735	23.8266	26.1707	26.0669
166	25.7509	28.5857	25.4236	25.4753	27.5008	25.7922	20.7548	26.2058	24.5222	24.538	22.3501	22.7647	18.3389	19.9392	15.626	18.7477	14.3314	18.221	17.9907	18.4365	15.679	19.5105	22.1643	20.2185	21.7479	15.7038	19.8923	16.5633	19.8516	18.9532	20.3521	20.9004	19.1748	19.511	19.6071	19.8029	21.6308	18.1864	15.0084	16.7409	13.328	17.3328	15.1617	18.8508	14.1498	19.1748	19.3951	21.9664	22.0717
167	30.4939	33.4297	30.289	30.2387	32.2781	30.5641	25.5897	30.8265	28.8596	28.1513	26.6312	27.1074	22.6015	24.2286	19.7516	22.7673	17.7778	21.7582	21.0739	20.9376	17.7713	21.0196	23.8501	21.8959	24.0837	18.3064	22.7052	19.2453	22.401	21.8999	23.2992	24.0501	22.7564	23.6867	23.7102	24.0605	25.6084	21.6737	18.8913	20.3502	17.719	20.3055	18.7798	20.7887	16.7869	21.2514	21.3432	24.2593	24.376
168	30.2977	32.6591	29.2088	29.6317	31.47	28.7888	23.9709	29.6129	27.331	26.4281	24.0144	23.9295	19.1648	20.1514	15.6434	17.9697	12.5838	16.6138	15.636	15.6885	12.6184	16.316	18.9303	17.0844	18.7789	12.8971	17.3854	14.0406	17.7016	17.6407	19.3818	20.9199	20.5782	21.6539	22.7273	23.5559	25.4325	21.8474	18.4765	19.2104	15.598	18.3849	15.6528	17.1286	13.0529	16.871	16.4628	19.2542	19.1766
169	35.2238	37.7849	34.3193	34.2799	36.2551	33.7357	29.0746	34.0215	31.2743	29.8584	28.6551	28.9531	24.3815	25.8403	21.3789	24.0827	18.5222	22.7105	21.1712	20.9125	16.9192	19.4532	22.4494	19.4769	22.603	17.705	21.5904	18.5756	22.3247	22.6274	24.1496	25.3063	24.6122	25.9086	26.1188	27.3404	28.062	23.7051	21.4323	22.1614	20.0392	21.7467	19.7877	20.9482	17.7726	20.4903	19.2766	22.6743	22.4654
170	38.6519	41.1643	37.6711	37.6868	39.6595	36.9786	32.3537	37.3569	34.5412	33.2938	31.6401	31.7959	27.187	28.357	23.9856	26.1111	20.4143	23.9964	22.2384	21.0044	16.5688	18.0047	21.8695	18.7834	23.3579	18.9916	23.3546	20.5459	24.5509	24.8602	26.4159	27.8979	27.5785	29.0338	29.6634	30.8748	31.9723	27.7913	25.0412	25.9247	23.2373	24.6432	22.1704	23.2303	20.0768	22.6908	20.9709	24.4507	23.8368
171	41.0145	43.2646	39.6194	39.6792	41.2773	37.9339	33.8522	38.3992	35.3104	32.8846	31.4231	31.1357	26.7583	27.2828	23.2711	24.7591	19.4169	22.9276	21.2353	20.8277	17.0713	18.6164	21.2574	17.1723	20.3752	17.4975	19.9593	17.8898	21.5642	22.7072	24.1984	26.3005	27.4345	29.4335	30.6992	32.6428	33.8944	29.6951	26.9482	26.8436	23.5812	23.9016	20.4129	20.2314	17.5828	18.7704	16.725	20.3065	19.9528
172	43.8915	46.1632	42.5908	42.4289	44.4117	41.4291	37.0731	41.6644	38.4918	36.7273	35.4843	35.6215	31.1761	32.2694	28.0932	30.037	24.4193	28.1723	26.4057	25.5438	21.2143	22.4193	25.8683	22.1764	26.4433	22.789	26.2218	23.7308	27.4199	28.1212	29.4931	31.1054	31.2103	32.9999	33.758	35.2931	36.1237	31.5539	29.3153	29.4572	26.7755	27.8534	25.0462	25.7941	23.4062	25.0916	23.2806	26.8554	26.4175
173	42.7082	45.3975	41.9824	41.8795	43.8669	41.4167	36.7797	41.5934	38.7563	37.3445	36.173	36.4429	31.9022	33.1729	28.8131	30.7582	24.9285	28.5375	26.7103	25.453	20.893	21.7634	25.8637	22.8441	27.4605	23.3562	27.828	25.0918	28.8776	29.3705	30.7233	32.1606	31.8871	33.4249	33.687	34.7607	35.7107	31.4278	28.955	29.798	27.3326	28.6653	26.19	27.2276	24.5401	26.7724	25.1077	28.6528	28.1215
174	39.3936	42.1285	38.7634	38.7255	40.6812	38.3674	33.6459	38.5773	35.9188	34.8329	33.3949	33.6981	29.1087	30.4496	26.0453	28.295	22.6041	26.4799	24.927	24.0357	19.7988	21.5862	25.2978	22.681	26.5784	21.6725	26.2054	23.1554	27.0711	27.2179	28.7472	30.0061	29.3214	30.6016	30.8212	31.7537	32.8388	28.6335	26.0453	27.2549	24.857	26.5062	24.3875	25.6734	22.3894	25.3559	24.0692	27.4542	26.9555
175	35.596	38.5785	35.443	35.3568	37.4007	35.6282	30.6963	35.8341	33.6841	33.1004	31.4791	31.8569	27.2663	28.7164	24.2396	26.6862	21.1194	24.518	23.1078	21.7903	17.768	19.5293	23.4178	21.4022	25.1701	20.1949	25.4902	22.3781	26.4573	26.2992	27.8707	28.9119	27.7153	28.5688	28.4782	28.9052	30.252	26.2813	23.6086	25.2219	22.5541	25.3055	23.5725	25.3518	21.3937	25.3297	23.8976	27.1129	26.2628
176	34.0897	36.8717	33.678	33.8889	35.8756	33.7982	28.8131	34.402	32.3512	31.8531	29.5367	29.5935	24.8624	25.8579	21.2868	22.7842	16.8862	19.8319	18.3283	16.56	12.3786	13.7042	17.7565	16.0412	20.1071	15.5424	21.1712	18.3791	22.6622	23.5172	25.2851	26.7787	26.0508	26.9434	27.48	28.0519	29.6606	25.871	22.8064	24.1409	20.7903	23.8004	21.3846	22.9579	18.9448	21.8385	20.1044	23.1818	21.9199
177	33.0345	35.919	32.9342	33.1657	35.2748	33.5026	28.3867	34.301	32.6929	32.5144	29.8364	29.7557	25.0282	25.6279	21.1347	22.7189	17.2409	19.7319	18.6715	16.9554	13.7575	16.2142	19.5412	18.6351	21.6121	16.5105	22.3371	19.6253	23.6216	24.0237	25.9114	27.4469	26.7615	27.378	27.9001	27.8245	29.4724	25.8959	23.1172	24.8831	21.1238	24.8003	21.9479	24.0496	19.7625	23.4855	22.0669	24.8602	23.5769
178	28.9069	31.8612	28.9851	29.2253	31.3329	29.8502	24.6749	30.6493	29.3813	29.5901	26.7183	26.502	21.7604	22.2028	17.7311	19.3119	14.0528	16.9915	16.2317	15.3995	12.8505	16.0942	18.8857	17.8118	19.9417	14.1513	19.5558	16.6814	20.4643	20.8138	22.7353	24.3089	23.8491	24.3007	24.7456	24.7029	26.6384	23.5665	20.337	21.9779	18.0621	22.0495	18.859	21.1301	16.7246	20.5834	19.6432	22.1533	21.2908
179	28.1894	31.1895	28.5875	28.9157	31.0866	29.8202	24.7157	30.9677	30.1963	30.5769	27.5335	27.1363	22.8943	22.8624	18.9612	19.7321	15.6162	17.2828	17.1386	15.8119	14.382	17.1748	19.9423	19.4168	21.4957	16.1931	21.6359	19.2705	22.6351	22.8687	24.9276	26.2364	25.2926	25.303	25.8734	25.5105	27.4905	25.0413	21.7711	23.4214	19.1986	23.9673	20.6646	24.1116	19.0803	23.3597	22.7518	24.8459	23.7065
180	24.608	27.2852	24.3518	24.8754	26.8931	25.1969	20.027	26.3547	25.3576	25.5046	22.3639	22.0173	17.5531	17.9696	13.94	15.7768	11.6518	14.8239	14.8445	15.2513	13.2557	17.2835	19.9138	17.9536	19.4488	13.4218	17.7367	14.9425	17.9293	17.6422	19.4354	20.6871	19.9526	20.2056	21.2519	20.9661	23.0662	20.8636	17.3206	18.4586	14.0395	18.5754	15.1197	18.5624	13.4883	18.5427	18.7461	20.6425	20.4085
181	23.4557	26.385	24.2282	24.5334	26.912	25.1324	20.8316	27.699	27.793	28.0036	24.5269	24.0317	20.5211	19.8105	16.8826	17.0522	14.1289	15.6944	16.5324	16.1225	15.7218	18.8355	21.2873	20.2092	21.6466	16.7526	21.0219	19.1934	21.6105	21.4429	23.4374	24.5549	23.8519	23.3535	24.28	22.8841	25.3369	24.2578	21.0338	22.5144	17.9096	23.3011	19.4854	23.6985	18.3285	23.0576	23.379	24.5382	23.8574
182	17.0444	19.9003	17.4903	17.8325	20.1101	18.7836	14.1245	20.7895	21.1286	21.688	18.3857	18.5177	15.729	15.8657	13.9876	15.6368	14.1237	16.41	17.7566	18.111	17.7942	21.0931	23.5039	22.0764	23.2297	17.7015	20.6069	17.8171	19.7874	18.7749	19.9852	20.0703	18.3773	17.3269	17.8702	16.08	18.6707	18.2478	15.2684	16.7013	12.5764	18.3223	15.2079	20.5306	15.1117	21.394	22.578	23.7972	24.1079
183	17.7595	20.3543	18.3091	18.9823	21.4442	19.0512	15.6638	22.8869	23.8209	23.9777	19.996	19.9604	17.6558	16.5237	15.266	15.1463	14.3999	16.0174	17.8191	18.6861	18.8792	22.1304	24.2001	22.6667	23.314	18.9042	21.2169	19.0656	20.9276	20.1149	21.6812	22.2348	21.375	20.2526	21.2971	19.0965	22.0178	22.2998	19.4944	20.5055	16.1165	21.7042	17.9852	22.8934	17.7872	23.0749	24.3208	24.2019	24.8316
184	14.3201	16.9477	14.8885	15.3564	17.7413	15.7524	11.8994	18.9993	19.9747	20.3242	16.5187	16.839	14.9118	14.4465	13.7199	14.7227	14.877	17.0289	18.9367	20.3682	20.7616	24.6865	26.6891	24.149	24.501	19.7451	21.214	18.4283	19.6562	18.2209	19.6037	19.4366	18.0857	16.7213	17.604	15.1653	18.11	18.6469	16.0983	17.0368	13.0695	18.6739	15.4545	20.9598	16.0061	22.2235	23.7659	23.8685	25.1546
185	14.1789	15.8836	14.0719	15.4505	17.9376	14.6356	13.4226	20.4787	22.5362	22.4914	18.0451	18.5026	17.869	16.1683	16.8245	16.131	17.4387	18.406	20.5901	21.6567	23.0146	25.9674	27.5362	25.7442	25.1546	22.4929	23.3562	20.7431	22.2274	20.7359	22.5427	22.1794	21.5673	20.2675	21.2803	18.4239	21.5979	23.1182	20.8125	21.4347	17.9683	23.157	19.7605	24.4997	20.1705	25.2223	26.9227	25.7114	27.2358
186	11.8259	13.0813	11.8838	13.479	16.0086	13.0649	13.0671	19.5122	22.2694	22.3499	17.9672	18.8098	18.5789	17.1493	18.3073	17.5568	19.4989	20.2046	22.5549	24.2138	25.8575	29.1053	30.4747	28.2954	27.1658	24.7534	24.8958	22.2816	23.454	21.9164	23.7979	22.8594	22.1741	20.7299	21.4852	18.3083	21.4302	23.454	21.5158	22.0597	19.2498	24.1429	21.1193	25.974	21.9317	26.8507	28.6739	27.0463	28.6844
187	13.6426	14.3526	12.6272	14.463	16.7469	12.3547	12.4439	19.3657	21.1342	20.2085	15.3826	15.2483	15.3798	12.5508	13.9989	12.8352	15.0826	15.7972	18.5046	20.703	23.059	26.3864	27.5122	24.6337	23.2998	20.4269	20.1044	17.5898	18.2215	17.3246	19.3686	19.1837	19.606	18.7903	20.2417	18.366	21.653	23.6176	21.6983	20.7438	17.6634	21.5026	18.1499	21.7073	18.1875	22.2316	24.1427	22.078	23.9019
188	12.9399	12.2891	11.7807	13.9833	15.9882	11.7266	13.3754	19.5028	22.4224	22.0696	17.5422	18.3627	18.9907	17.3149	19.112	18.4663	20.703	21.4575	24.0888	26.1037	28.2887	31.507	32.7067	30.1009	28.5716	26.0763	25.7499	23.1394	23.1878	22.1813	23.9387	22.8359	22.7228	21.4605	22.4221	19.4179	22.5462	24.8263	23.4314	23.3529	20.8387	25.3058	22.3609	26.5616	23.1507	27.6979	29.7013	27.6561	29.5504
189	11.8169	10.0533	11.4981	13.8744	15.8968	12.5419	14.875	20.3202	23.7155	23.6415	19.4936	20.7347	21.6524	20.4971	22.4086	22.063	24.3051	25.1119	27.7587	29.7544	31.9424	35.0997	36.2856	33.7579	31.9841	29.7275	29.3059	26.6812	26.2707	25.3541	26.9321	25.4136	25.1354	23.5692	24.2938	20.9712	23.3874	26.3327	25.3497	25.6209	23.4516	27.9526	25.4101	29.7607	26.5302	31.1918	33.2409	31.1373	33.1021
190	8.98287	7.72616	9.21257	11.5516	13.6251	11.3055	13.7341	18.3661	21.8627	22.6943	19.0965	20.9429	21.8627	21.4686	23.2636	23.6483	25.8438	26.8846	29.5981	31.6581	33.5548	36.9773	38.2868	35.6525	34.2605	31.54	31.1398	28.1091	27.563	26.2699	27.6294	25.6666	24.8693	22.724	22.8538	19.2584	20.9984	24.3035	23.564	24.706	22.9857	27.642	25.6754	30.5426	27.391	32.4808	34.5243	32.7386	34.9051
191	6.04192	5.94015	7.17673	9.0918	11.4612	10.7344	11.684	16.2969	19.7667	21.2429	17.6281	20.0908	20.4793	21.4256	22.6192	24.2338	26.3347	27.7145	30.4043	32.4561	33.8543	37.5674	39.1689	36.3958	36.0305	32.0584	31.9018	28.4183	28.3327	25.9892	27.0416	24.5385	23.083	20.7206	20.3313	16.6567	18.2104	21.5213	20.9158	22.2516	21.0689	25.6906	24.2448	29.4272	26.3217	32.1864	34.4029	33.422	35.893
192	6.61699	8.53064	8.80174	10.0661	12.7006	11.7419	11.7228	17.1822	20.5392	21.5911	17.8569	19.5825	19.5363	19.854	20.7994	21.9612	23.9662	25.0851	27.5923	29.4359	30.7341	34.3444	35.9937	33.4197	33.207	29.2901	29.5214	26.2252	26.9023	24.4819	25.8167	23.8422	22.4867	20.6278	20.226	16.5364	18.1781	21.073	20.02	21.5594	19.9748	24.7258	22.7106	28.0473	24.3923	30.291	32.2773	31.3579	33.501
193	3.99478	7.1667	8.00516	5.8269	10.0081	12.0316	10.8268	13.8889	17.0853	19.584	16.5816	20.2015	19.6919	21.8046	21.7926	24.0126	25.0754	26.9191	29.123	30.6751	31.1103	34.9314	36.9468	34.5113	34.7449	30.0162	30.9919	27.7724	28.3048	25.9147	26.4873	23.8074	21.199	18.4059	16.6751	13.0261	13.5087	16.7296	16.2283	18.109	18.7036	23.1123	22.5569	28.1524	24.3944	31.0466	33.1403	33.2439	35.1382
194	8.98568	11.816	12.4285	11.8055	15.4007	16.3892	14.6848	19.3768	22.4045	24.2302	20.8981	23.4131	22.545	23.3734	23.4864	24.6012	25.3786	27.0964	29.1159	30.3494	30.8951	34.3355	36.2972	34.3011	34.6882	30.3676	31.692	28.7364	29.7729	27.6948	29.0825	27.0202	24.7035	22.4002	20.9995	17.4322	18.8893	21.2646	19.6735	21.6863	21.1993	26.1589	24.8227	30.4942	26.2349	32.6265	34.3938	34.0789	35.6548
195	11.0945	14.213	14.5427	12.8515	16.83	17.8463	15.0408	19.6086	21.8331	23.8487	20.9328	23.1073	21.4268	23.1239	22.108	24.7752	24.8929	27.2379	28.9932	30.2077	29.9639	33.7661	36.0241	33.8713	34.5008	29.3827	31.1029	28.0665	28.7633	26.7664	27.5549	25.8459	23.2729	21.0907	19.1623	16.0712	17.7564	18.697	16.9988	19.096	18.6236	23.8979	22.5458	28.2872	24.1045	31.0279	32.9725	33.7262	35.0763
196	13.5507	16.7327	17.3127	14.6834	19.087	20.8594	17.9855	22.0113	23.822	25.9912	23.324	25.6511	23.6508	25.8333	24.2165	27.4782	27.1273	29.6815	31.1636	32.2833	31.5563	35.3507	37.7668	35.7661	36.6087	31.176	33.3033	30.0015	30.9508	29.0841	29.5621	27.7905	24.8324	22.8226	20.5033	17.4411	19.3088	19.5083	17.8726	20.0601	20.0055	25.1109	24.2128	29.8644	25.7743	32.8433	34.7895	36.0722	37.1689
197	16.8094	20.0456	20.2347	17.3839	21.7709	23.3053	19.8565	23.6286	24.9683	27.1608	24.8052	26.9964	24.69	27.0113	24.9008	28.4517	27.6518	30.1812	31.4708	31.864	31.218	34.5902	37.0965	35.7063	36.8829	31.284	33.7834	30.3435	31.5675	29.9152	30.2592	28.5903	25.4584	23.6736	21.1083	18.1863	19.622	19.6454	18.1296	20.3238	20.3862	25.3998	24.6521	30.1746	26.0633	33.1383	35.0068	36.6446	37.5094
198	12.7661	16.1591	15.0297	12.8415	16.5806	17.8729	14.2041	18.0613	19.3434	21.4802	19.0223	21.3158	19.1398	21.8551	19.9877	23.897	24.0869	26.6805	28.4327	29.4312	28.2111	32.1093	34.665	32.66	33.6811	27.9071	29.7724	26.1459	26.8481	24.8226	24.9992	23.1167	20.0375	18.0838	15.7519	12.8745	14.8894	14.742	13.0887	15.2316	15.3351	20.3017	19.6709	25.2708	21.5113	28.6601	30.8368	32.2531	33.7665
199	16.7176	20.1714	18.385	15.7422	19.4692	20.1567	16.4332	19.6693	19.8035	21.321	20.3431	22.3986	19.6245	22.6075	19.637	24.1927	23.381	26.6188	27.8121	29.086	27.7215	31.7819	34.3972	32.0087	32.7805	26.8397	28.9937	25.0243	26.2301	24.442	24.5146	22.9102	19.4307	17.9672	15.0798	12.695	14.0783	12.9804	11.6947	13.7978	14.3629	18.9826	18.7141	23.9214	20.2308	27.3182	29.3787	31.3954	32.7095
200	14.2727	17.762	15.3808	13.7387	16.7085	16.7739	12.2028	16.7476	16.7967	18.2959	16.2985	17.4611	14.5879	17.2775	14.5052	18.9752	18.8907	21.8411	23.5295	25.0368	24.2123	28.6426	30.9807	28.0912	28.4942	22.6464	24.2623	20.3303	21.238	19.4467	19.6303	18.1701	15.1667	13.8148	12.4008	10.2726	12.4508	11.3203	9.30295	11.0336	9.67452	14.9078	13.9187	19.4147	15.5205	22.6839	24.8586	26.6816	28.1888
201	18.9425	22.2321	19.2632	17.6489	20.2555	19.4947	15.3482	18.5862	17.0469	17.3936	17.7945	19.535	16.2801	20.0555	16.3744	21.8538	21.1717	24.9916	26.24	27.6797	26.0275	30.4973	32.9567	30.0264	30.5388	24.3579	26.0935	21.567	22.5238	20.5281	19.8675	18.4389	14.7803	14.104	11.4565	10.6807	11.7006	8.59397	6.96172	9.17697	10.22	13.5599	14.3733	18.7947	16.1152	22.9579	25.317	27.7685	29.7183
202	19.4964	22.3893	19.2531	18.7918	20.8309	19.6529	14.9526	19.4156	17.968	18.1271	17.3611	18.5067	15.0657	17.8952	13.9497	19.0176	17.695	21.5387	22.6817	24.1281	22.6309	27.1404	29.5628	26.6048	27.1204	20.9556	22.9298	18.5456	20.0154	18.2505	18.3312	17.5629	14.4518	13.999	12.5911	12.3511	13.7414	10.0753	7.69913	9.96182	8.77969	12.8272	12.57	16.9389	13.5105	20.2368	22.2721	24.7431	26.3861
203	22.6466	24.8879	21.5324	20.5388	22.7069	20.3892	16.4283	19.7077	16.7712	15.8024	15.9971	17.5183	14.3065	17.611	13.4855	19.2213	18.231	22.4304	23.7081	25.3421	23.6844	28.2397	30.4944	27.0896	27.1406	21.0458	22.2037	17.4179	18.2601	16.437	15.4076	14.8704	11.776	12.4109	11.3874	12.4514	11.8657	7.87606	6.68694	7.83423	7.25012	9.46006	10.6988	13.7045	11.5331	17.959	20.356	23.1644	25.5024
204	23.9349	25.9752	22.4802	21.9749	24.0739	21.4868	17.1589	21.3964	18.6207	17.3938	16.6687	17.4484	13.4231	16.194	11.5556	16.6772	14.4973	19.0263	19.8384	21.3868	19.6327	24.1945	26.3175	22.7668	22.8556	16.8177	18.2551	13.5931	14.9849	13.6938	13.6276	13.9462	12.3932	13.5572	13.5651	14.7999	15.615	11.3287	8.94684	9.77193	7.84063	9.74862	9.24653	11.4071	8.33368	14.2675	16.2323	19.1423	21.2155
205	26.8214	28.2625	24.7928	23.8817	25.6018	22.7716	19.2897	22.197	18.8548	16.7654	16.3055	17.1701	13.7639	16.5919	12.5623	17.6003	16.3085	20.546	21.5248	23.3144	21.7815	26.1712	27.9149	24.1809	23.7651	18.1979	18.37	13.9085	14.2423	13.2084	11.9434	12.5105	11.6216	13.6735	14.2359	16.0176	16.7846	12.1554	10.2982	9.6585	7.01904	8.02859	7.13957	9.37219	8.4888	13.0728	15.3407	18.4976	20.8827
206	28.3575	29.6502	26.0321	25.6977	27.2277	24.0645	20.2215	24.1976	21.0386	18.9912	17.7386	18.0838	13.9616	16.0853	11.7582	16.1131	13.3866	17.9608	18.157	19.3739	17.075	21.1616	23.0376	19.6522	19.8433	14.3869	15.8869	11.6561	13.0323	12.4049	12.6159	13.6716	13.4472	15.3638	16.3946	18.3502	19.6869	15.3462	13.2411	11.9972	9.19477	10.0952	7.88385	9.61402	7.27268	11.6646	13.1542	16.3863	18.0204
207	31.3472	31.8278	28.3593	27.4993	28.3402	25.2711	22.5917	24.3733	21.0707	17.9181	18.0098	18.567	15.6301	17.1516	13.9641	17.2574	15.3762	19.2215	19.6765	21.3916	20.0842	24.037	24.7265	21.2095	20.2375	15.9276	15.0148	11.8434	11.9007	12.203	11.6707	13.0016	13.5538	15.825	16.9786	19.5283	21.0416	15.795	15.5778	12.6181	9.98045	9.56278	7.41233	7.42872	7.33826	9.65639	11.1011	14.4113	16.5301
208	34.1559	34.5327	31.0119	30.395	31.1572	27.9033	25.1475	27.1182	23.9792	20.1886	20.3505	20.3522	17.4808	18.5659	15.6188	17.3754	13.948	17.6514	17.2559	18.4025	16.8065	20.1842	20.5388	16.9301	16.4635	12.9882	12.6356	10.8156	12.0506	13.3383	12.6078	14.5065	15.8818	18.493	20.0202	22.6435	24.4207	19.3167	18.7589	15.9659	13.0537	12.3113	9.11683	7.1569	7.40889	9.12204	8.95992	12.0845	13.5656
209	34.4342	33.6272	30.3623	29.832	29.6367	26.277	24.8172	25.4602	22.8206	18.2219	18.4189	17.8499	15.1499	16.2026	15.9275	17.3234	18.101	21.0579	21.7624	23.7262	22.933	26.5782	26.4933	22.9861	21.4364	18.0153	15.7764	13.6924	11.705	12.4396	10.2979	12.3207	14.1021	17.4133	19.8226	22.8743	25.0358	20.4046	20.3057	16.2627	14.1023	11.8351	8.93793	2.8276	7.89648	7.5811	11.3914	13.9174	16.1581
210	37.5488	37.181	33.8257	33.1092	33.2464	29.9999	28.1349	28.9751	26.0267	21.7687	22.1917	22.0174	19.3046	20.4847	19.3065	21.0579	21.2081	24.0517	24.5706	26.5163	25.7875	29.1973	28.7361	25.2921	23.661	20.7613	18.4546	16.689	15.1773	16.0454	14.3113	16.2367	17.7485	20.7359	22.6527	25.5725	27.1658	20.8533	22.8542	17.7173	16.6495	14.657	12.0197	7.32441	10.9314	11.2316	13.9904	16.6684	18.2845
211	38.2243	37.113	34.0205	33.1735	32.7016	29.6062	28.5875	28.1894	25.5129	20.8172	21.8864	21.2982	19.1179	19.3338	18.8828	19.5004	20.9878	23.2741	23.8235	25.9592	25.9206	28.9018	27.6288	24.5049	22.1381	20.215	17.1107	16.4848	14.3326	15.7614	14.462	16.2467	17.0469	20.9521	23.0749	26.1225	28.075	22.8724	24.7302	18.6033	18.3803	14.8089	13.3707	6.04655	10.9608	9.58491	12.8543	14.6361	16.0139
212	34.8782	34.0034	30.7194	30.7078	30.4338	26.8074	25.1989	26.7246	24.4306	19.8458	19.1056	17.9576	14.482	14.054	13.6317	14.1304	15.6308	17.9418	18.4969	20.7954	21.2783	24.3377	22.7399	19.7946	16.9597	15.025	11.6234	11.5665	9.1315	10.7795	9.79743	12.3821	15.0512	18.559	21.475	24.4856	26.9311	23.6758	23.078	19.196	16.7186	13.4764	10.4347	2.81099	6.23755	4.17607	7.52086	9.11378	10.6523
213	39.0097	38.343	34.9989	34.9766	34.8316	31.2061	29.3727	31.0769	28.6477	24.1088	23.4716	22.3867	18.8332	18.0957	16.9051	16.7147	17.029	19.2978	19.0366	20.5938	20.6297	22.2956	20.8524	17.9526	15.8533	14.5104	12.5096	13.3974	12.3589	14.5708	14.017	16.7436	19.3014	22.738	25.4849	28.4738	30.849	27.1159	26.5345	22.7123	20.1577	17.2749	13.9961	6.65234	9.36422	7.55708	7.92095	10.0633	10.273
214	34.1936	33.1015	29.9264	30.222	29.731	26.0321	24.6646	26.2955	24.347	19.7414	18.6106	16.9408	13.4253	11.3399	11.2499	10.5096	13.0105	15.2539	16.0858	18.0471	18.0335	20.6486	19.402	16.2081	13.9587	12.1341	9.22784	9.52152	6.9592	9.29174	7.29468	11.8796	14.9748	18.5179	21.7223	24.6844	27.2459	24.964	24.0419	20.2528	17.6114	14.0535	11.2104	4.9576	6.49584	3.34182	4.73345	5.67132	7.81714
215	34.4519	34.4258	30.9257	31.407	31.7879	27.975	25.1992	28.7742	26.4102	22.6594	20.7535	19.3735	15.4429	14.0708	11.6757	12.019	11.3185	13.5264	13.0916	14.0164	12.9766	15.4015	14.8771	11.3202	10.6773	8.63964	7.21714	7.12761	7.43523	9.56969	11.0627	14.0766	16.8896	19.9384	22.7362	25.4044	27.922	25.5616	23.0071	20.7491	17.2689	14.7683	11.0309	7.50864	4.45783	3.63842	2.96933	5.72564	7.41873
216	32.7438	33.0197	29.4406	29.572	30.2292	26.5666	23.5471	26.7486	23.9794	20.0317	19.0914	18.0878	14.3923	14.0602	11.8707	13.0502	11.8024	14.607	14.7941	16.4951	15.9832	19.3184	18.8631	15.4144	13.7545	10.7503	9.01248	7.53655	7.57736	9.29213	10.0034	12.4701	14.7917	17.8521	20.226	22.8897	25.2395	21.577	19.7881	17.6027	14.0464	11.8996	8.17911	4.68811	3.09126	4.15096	4.79924	7.87711	9.53604
217	27.7107	28.731	25.0739	25.3425	26.236	22.6566	19.2099	22.8991	20.1104	16.7555	15.2935	14.8018	11.2169	12.2676	8.69473	11.7982	8.67846	13.1182	13.7327	15.4811	14.3229	18.8468	20.295	16.4413	15.846	10.3425	10.2158	6.83351	7.19988	7.25019	7.45365	9.46757	11.1206	13.7785	16.0602	18.7127	21.0591	18.2235	15.0918	13.622	9.93992	8.00948	4.05878	3.67278	2.88495	5.0862	6.31294	9.62452	11.84
218	28.502	28.8974	25.3477	24.8681	25.7302	22.4112	19.4578	21.9691	18.8221	15.2721	15.1456	15.3336	11.9775	14.0724	10.7058	14.686	13.6382	17.1979	18.0281	20.1089	19.3009	23.4513	24.0233	20.3527	19.1456	14.6611	13.2778	9.72845	9.3628	9.44123	8.23227	9.92849	10.8836	13.1336	14.7822	17.3698	19.4568	15.0034	13.8311	11.3073	7.90277	7.0713	3.85165	4.37099	5.07652	7.40815	9.5002	12.7216	15.085
219	22.3234	23.4321	19.8022	19.6072	21.1446	17.9377	13.969	18.0836	14.8958	12.2159	11.5661	12.2967	8.27254	11.1727	6.85027	12.3468	11.5632	15.8343	17.0111	18.8729	17.7161	22.4101	24.3072	20.3915	19.9485	14.1477	14.3271	9.57721	9.57774	8.25285	7.34516	7.5254	7.02641	9.24902	10.5814	12.7393	14.8317	11.8648	8.73092	7.44172	3.75127	3.30483	2.87183	4.91461	3.67428	8.99479	11.7326	14.5734	17.1242
220	23.8394	24.495	21.2247	19.7931	20.9511	18.4675	15.5292	16.9002	13.5405	11.1953	12.5386	14.1235	11.0247	13.9208	10.339	15.703	15.6211	19.454	20.8803	23.0443	22.0968	26.7009	28.1733	24.27	23.5743	18.0338	17.7225	12.9997	12.7941	11.2958	9.54575	9.73731	7.80417	9.47664	9.33213	11.4651	12.3262	7.4491	7.52882	4.07467	3.3265	3.94116	5.12719	7.34049	6.97256	12.1622	14.9244	17.8569	20.4085
221	20.1599	21.33	17.9722	16.7899	18.5518	16.1337	12.5689	15.2497	12.1713	11.1292	11.4902	13.329	10.0448	13.0777	8.54272	14.055	13.4149	17.2732	18.8314	20.6834	19.2693	23.9539	26.1404	22.6302	22.7505	16.6016	17.7837	13.1623	14.1832	12.33	11.2287	10.637	7.32783	7.81579	7.13555	8.86669	9.9766	6.36278	3.50733	3.33874	2.81974	5.21783	6.6218	9.66483	7.76424	14.6277	16.9642	19.345	21.4711
222	19.5047	21.5375	18.3491	17.1154	18.9769	17.2958	13.4529	15.0912	12.1283	10.4486	13.4519	15.4867	12.4369	16.1546	12.7402	18.6798	18.8263	22.629	24.2789	26.236	25.1051	29.8214	31.9248	28.1865	27.959	21.9664	22.541	17.705	18.0059	15.8798	14.3007	13.1842	9.59862	9.75445	6.97601	8.767	8.22977	3.62564	3.1097	3.68329	5.05641	6.50276	9.72741	13.0374	11.5505	18.0442	20.7825	23.4459	25.9601
223	14.8991	17.1318	13.6718	13.3868	15.3762	13.4614	8.76861	13.5219	11.9096	12.4638	11.1654	12.4381	9.27828	12.9948	10.1012	15.4219	16.6774	19.5954	21.7327	23.8709	23.5106	28.2245	30.284	26.6517	26.4034	20.6118	21.1007	16.7214	16.7953	14.5611	13.7987	12.0253	8.67642	7.77351	7.04315	5.97186	7.40817	4.90384	2.91157	5.16737	3.77843	8.26774	8.38509	13.5156	10.9979	17.9943	20.7385	22.5052	25.2047
224	15.8669	19.0815	16.438	13.9377	16.9878	16.8654	13.1221	15.6386	14.4833	14.9967	16.0856	18.1191	15.1812	19.2647	16.3205	21.8297	22.1762	25.5773	27.3599	29.0838	28.0056	32.6186	34.9335	31.6706	31.809	25.7501	26.8592	22.3309	22.7807	20.627	19.6119	17.5792	13.7458	12.5626	9.0804	7.62929	7.55223	5.41524	5.62045	7.52998	9.57336	13.0784	14.3137	18.9427	16.6817	23.5923	26.2044	28.4332	30.7136
225	13.1906	16.5619	14.7687	11.5494	15.4874	16.5122	13.1261	15.7561	15.673	17.138	16.8162	19.4818	16.9115	20.9606	18.4138	23.5441	24.1472	27.2139	29.0836	30.7393	29.8066	34.3214	36.6719	33.6067	33.8431	27.8763	29.082	24.7625	25.1621	22.9745	22.1091	19.8745	16.1318	14.2844	10.9234	8.37732	9.5377	8.77968	7.63577	9.95561	12.2496	15.9471	16.8627	21.8452	19.2712	26.3452	28.9176	30.8362	33.0505
226	16.4404	19.7754	18.1753	14.5873	18.8186	19.8308	16.3826	18.8896	19.0714	20.5971	20.1817	22.8657	20.2813	24.1652	21.3743	26.3153	26.3032	29.472	31.0362	32.4662	31.252	35.592	38.0661	35.3582	35.8905	29.8973	31.5785	27.3664	28.1019	26.0913	25.4331	23.3319	19.6155	17.8278	14.4129	11.7156	12.4756	11.4616	11.1035	13.3057	15.4077	19.0124	19.9861	24.736	22.094	29.0494	31.4104	33.6953	35.4324
[truncated: 175 more columns]

## Sheet: avGFP
	2	3	4	5	6	7	8	9	10	11	12	13	14	15	16	17	18	19	20	21	22	23	24	25	26	27	28	29	30	31	32	33	34	35	36	37	38	39	40	41	42	43	44	45	46	47	48	49	50
2	0	1.29885	2.27524	2.23827	3.43074	5.81465	6.95362	10.0483	13.7082	10.2885	14.2343	15.6382	18.0474	20.2596	22.7045	26.2406	28.1456	31.7477	33.6729	34.6825	38.3966	39.658	37.6563	36.9701	31.6994	31.0468	27.5005	26.1107	23.0403	22.2325	19.3508	17.624	14.3992	13.8246	10.6422	11.6138	15.1884	14.9177	16.5162	17.5828	20.2004	20.0138	24.7738	23.3195	29.0212	32.5695	31.0037	34.9255	37.0792
3	1.29885	0	1.33721	2.74947	2.23413	2.56643	6.07209	8.40457	11.623	7.53972	11.8971	12.3749	15.0338	16.9579	19.6575	23.0484	25.2158	28.7604	30.5956	31.7331	35.5507	36.585	34.5746	33.946	28.4208	28.0308	24.3587	23.1444	19.9309	19.1655	16.3886	14.6162	11.5283	11.1261	7.84657	9.78811	12.762	12.7177	13.5722	14.133	16.9733	16.5764	21.5132	19.8649	25.764	29.2925	28.0048	31.883	33.8955
4	2.27524	1.33721	0	1.33119	2.77678	2.27675	3.37377	6.31793	9.91811	7.3171	12.2254	12.7113	16.0696	17.4885	20.574	23.5939	26.0178	29.4059	31.2468	31.9242	35.9971	37.1824	35.0052	34.5587	28.7176	28.9277	24.8684	24.17	20.7332	19.7235	16.3368	13.9258	10.3337	9.27828	5.85547	6.68054	10.1665	10.2612	11.7208	13.5277	16.1331	16.5635	21.5002	19.8432	26.2639	29.7584	28.9419	32.7054	34.5388
5	2.23827	2.74947	1.33119	0	1.32973	2.52398	2.53701	5.04667	8.78608	6.98607	10.8018	13.3465	16.1828	18.79	21.6897	25.3524	27.7242	31.2969	33.5784	34.446	38.6285	39.6865	37.1043	36.2318	30.7507	29.9415	26.0559	24.361	20.9299	19.6245	16.0127	13.7143	10.5907	9.91551	7.92669	7.63453	11.6425	12.25	13.6295	14.9941	16.9827	17.6698	21.905	21.4247	26.9006	30.6241	29.2598	33.5842	35.3587
6	3.43074	2.23413	2.77678	1.32973	0	1.32211	2.99641	4.28072	6.51954	3.06561	7.13301	9.38238	12.1417	15.052	17.3553	21.0065	23.0672	26.8167	29.1974	30.5866	34.69	35.3885	32.91	31.9266	27.0324	25.5525	22.1501	20.2816	16.8229	15.5687	12.1539	10.3148	7.46838	7.57373	6.5249	7.6978	10.7437	11.3952	11.2013	11.7745	13.5918	13.703	18.0116	17.7525	22.8219	26.5721	25.1652	29.4011	31.3019
7	5.81465	2.56643	2.27675	2.52398	1.32211	0	1.30552	2.77853	5.72327	2.85179	7.07457	5.80093	9.14729	10.5949	13.9749	17.1786	19.9064	23.2697	25.4769	26.0967	30.5176	31.5111	28.8515	28.1152	22.3622	22.1648	17.9267	17.0731	13.6258	12.8637	10.365	8.2632	5.43069	4.62199	2.30288	3.25736	6.22052	7.15482	7.62986	7.80316	10.4802	9.78438	14.8323	13.1434	19.1628	22.7094	21.8828	25.7382	27.5178
8	6.95362	6.07209	3.37377	2.53701	2.99641	1.30552	0	1.25877	4.65054	5.17775	9.77333	11.179	15.0839	17.4425	20.9758	24.4223	27.2429	30.6155	32.9407	33.393	37.9301	38.9491	36.124	35.2279	29.4724	28.9192	24.442	23.115	19.3487	17.514	13.667	10.4205	7.15762	4.58143	5.14859	2.93919	5.47946	8.37354	9.60482	11.8858	13.4216	15.46	19.1807	19.3106	24.9352	28.6995	27.9164	32.117	33.7069
9	10.0483	8.40457	6.31793	5.04667	4.28072	2.77853	1.25877	0	1.36967	2.7926	6.83488	8.19039	12.5595	14.7067	18.804	22.199	25.2921	28.4957	31.0232	31.2273	36.0235	36.948	33.7705	32.6728	26.9896	26.0928	21.4462	19.9066	16.1611	13.9243	10.0947	6.90848	3.71167	3.09398	4.05596	4.68691	5.5443	8.36426	7.60964	8.85599	10.1538	12.1792	15.6285	16.366	21.4616	25.2726	24.6732	28.9546	30.3742
10	13.7082	11.623	9.91811	8.78608	6.51954	5.72327	4.65054	1.36967	0	1.26455	3.42393	6.42237	10.3754	12.4727	16.7862	20.0331	23.534	26.4522	29.2149	29.1778	34.1878	34.9469	31.3557	29.9777	24.5753	23.1498	18.443	16.5868	12.9069	9.97212	6.14552	2.43679	2.53212	2.91288	4.98871	6.20688	5.43009	8.90575	6.17669	6.62576	6.88635	9.32473	11.5515	13.8247	17.4886	21.5393	21.0438	25.4815	26.6574
11	10.2885	7.53972	7.3171	6.98607	3.06561	2.85179	5.17775	2.7926	1.26455	0	1.39202	2.78594	6.36387	9.17819	12.7817	16.4065	19.4109	22.8422	25.6373	26.3342	31.1	31.7314	28.3864	27.0155	21.7317	20.2702	15.7675	13.9438	10.1235	8.12345	4.30924	2.53544	2.03792	3.90248	5.02965	6.80192	8.28147	9.67423	6.70008	6.7245	6.92168	6.81824	10.3193	11.5701	15.6588	19.5082	18.6363	23.0061	24.4558
12	14.2343	11.8971	12.2254	10.8018	7.13301	7.07457	9.77333	6.83488	3.42393	1.39202	0	1.31114	4.2559	7.50055	10.8092	14.4134	17.6369	21.0042	24.0088	24.7598	29.5525	30.0213	26.4779	24.9033	20.0752	18.0689	13.9855	11.4314	7.91437	6.36387	2.75093	2.7627	4.0873	7.62843	8.81838	11.035	12.0815	13.1256	9.24706	7.98235	7.07194	6.15085	9.29066	10.5638	13.9189	17.7936	16.0514	20.8709	22.4389
13	15.6382	12.3749	12.7113	13.3465	9.38238	5.80093	11.179	8.19039	6.42237	2.78594	1.31114	0	1.31987	2.53648	6.87889	10.0718	13.3346	16.4067	19.2333	19.7703	24.5849	25.1725	21.736	20.4414	15.1751	13.8889	9.51075	7.78625	3.96957	2.53115	2.08175	2.78447	2.43443	5.17877	6.86936	9.49897	10.0096	8.64199	5.28073	3.10824	4.15646	2.31965	6.57063	5.73182	10.044	13.8466	12.3891	16.9228	18.4609
14	18.0474	15.0338	16.0696	16.1828	12.1417	9.14729	15.0839	12.5595	10.3754	6.36387	4.2559	1.31987	0	1.30547	2.83032	7.47888	10.7343	14.0517	17.3972	18.4942	23.1757	22.8037	19.5964	17.352	13.6848	9.94039	7.11342	3.24628	2.45851	2.83401	4.24779	6.59632	7.88207	11.3192	12.5397	15.2317	16.2357	15.0358	11.7164	8.52901	8.37096	4.93754	7.01875	6.08918	7.9595	11.2751	7.96385	12.9913	14.8822
15	20.2596	16.9579	17.4885	18.79	15.052	10.5949	17.4425	14.7067	12.4727	9.17819	7.50055	2.53648	1.30547	0	1.33372	3.74149	7.18725	9.95608	12.7782	13.4862	18.2476	18.7101	15.3157	14.1889	8.95845	7.74884	3.87914	2.48052	1.90042	3.88255	5.60627	7.66792	9.16718	11.9009	13.4031	16.3389	16.7258	13.7751	11.4657	6.40953	7.71798	3.03961	6.04539	2.41988	6.51031	8.95097	7.34086	11.1626	13.1217
16	22.7045	19.6575	20.574	21.6897	17.3553	13.9749	20.9758	18.804	16.7862	12.7817	10.8092	6.87889	2.83032	1.33372	0	1.32216	4.20379	7.70599	10.9567	12.6664	17.0216	17.0287	13.694	12.2293	8.23467	5.21036	2.65667	1.96774	3.86262	5.94123	9.37369	12.3641	13.8266	16.648	17.4716	20.6409	21.3224	18.7169	16.3057	11.4018	12.5225	7.86509	8.78247	6.01855	7.03757	8.3987	5.17286	8.61374	11.4508
17	26.2406	23.0484	23.5939	25.3524	21.0065	17.1786	24.4223	22.199	20.0331	16.4065	14.4134	10.0718	7.47888	3.74149	1.32216	0	1.3241	2.84629	5.38249	6.10939	10.7359	11.0727	7.87387	7.43769	2.64345	2.43443	2.03158	3.80967	5.26671	9.19989	12.0546	15.0103	16.633	19.0449	19.9966	23.2545	22.9945	19.5673	18.2444	12.83	14.5077	9.44214	9.72752	6.2551	6.77543	6.68442	5.82663	6.62583	10.0165
18	28.1456	25.2158	26.0178	27.7242	23.0672	19.9064	27.2429	25.2921	23.534	19.4109	17.6369	13.3346	10.7343	7.18725	4.20379	1.3241	0	1.32739	4.47997	7.26696	10.7268	10.4868	7.64273	6.12778	2.86431	2.67362	4.01183	7.50898	9.1359	13.0553	15.8513	18.655	20.0962	22.6471	23.2243	26.6326	26.9088	23.6236	21.9969	16.6271	18.2209	13.3528	13.3744	9.78379	8.96262	8.2064	5.99965	6.12627	10.4394
19	31.7477	28.7604	29.4059	31.2969	26.8167	23.2697	30.6155	28.4957	26.4522	22.8422	21.0042	16.4067	14.0517	9.95608	7.70599	2.84629	1.32739	0	1.31911	4.24043	7.48966	6.63923	3.79254	2.53781	1.98843	3.49437	5.2714	9.08486	11.6407	15.4312	18.5821	21.2225	22.985	25.3832	26.2357	29.5759	28.8188	25.39	24.273	18.7835	20.3329	15.5548	15.1336	11.4636	9.87191	8.4519	8.21128	6.18608	10.4294
20	33.6729	30.5956	31.2468	33.5784	29.1974	25.4769	32.9407	31.0232	29.2149	25.6373	24.0088	19.2333	17.3972	12.7782	10.9567	5.38249	4.47997	1.31911	0	1.36635	3.5287	2.11527	2.37533	1.84771	3.67118	7.20492	8.65335	12.646	15.0686	18.737	21.7253	23.9559	25.3674	27.6147	28.1875	31.6395	30.8466	27.3481	26.4692	20.9683	22.8527	17.9579	18.2435	14.1199	13.0948	10.4481	11.6384	8.4861	12.2171
21	34.6825	31.7331	31.9242	34.446	30.5866	26.0967	33.393	31.2273	29.1778	26.3342	24.7598	19.7703	18.4942	13.4862	12.6664	6.10939	7.26696	4.24043	1.36635	0	1.33376	2.75861	2.03678	4.17311	2.20774	8.57508	8.59756	13.3675	15.7022	18.8171	21.875	23.6495	25.1844	27.0413	28.0236	31.2195	29.3462	25.8569	25.3475	19.6229	21.8582	17.4718	17.6033	13.3048	13.2816	10.4559	12.3709	9.26065	12.4694
22	38.3966	35.5507	35.9971	38.6285	34.69	30.5176	37.9301	36.0235	34.1878	31.1	29.5525	24.5849	23.1757	18.2476	17.0216	10.7359	10.7268	7.48966	3.5287	1.33376	0	1.32561	2.69422	6.56223	6.23463	12.3029	13.1911	17.9332	20.5219	23.7259	26.8461	28.7523	30.1226	32.0869	32.6913	36.0767	34.4469	30.9017	30.5093	24.8518	27.1422	22.5529	22.5657	18.2488	17.6508	13.9154	16.2121	12.8713	15.2686
23	39.658	36.585	37.1824	39.6865	35.3885	31.5111	38.9491	36.948	34.9469	31.7314	30.0213	25.1725	22.8037	18.7101	17.0287	11.0727	10.4868	6.63923	2.11527	2.75861	1.32561	0	1.33565	3.06795	6.3961	10.3555	12.866	16.9974	20.2387	23.5789	27.0001	29.4611	31.1203	33.2178	33.9511	37.3327	35.9707	32.4553	31.7927	26.1275	28.0163	23.4521	22.591	18.4288	16.5878	12.2898	14.0397	9.88347	12.5842
24	37.6563	34.5746	35.0052	37.1043	32.91	28.8515	36.124	33.7705	31.3557	28.3864	26.4779	21.736	19.5964	15.3157	13.694	7.87387	7.64273	3.79254	2.37533	2.03678	2.69422	1.33565	0	1.34753	2.72408	7.2979	9.17485	13.5467	16.634	19.9118	23.3196	25.7497	27.9274	30.077	31.314	34.4967	33.222	29.8253	28.7391	23.0647	24.333	20.0534	18.9187	14.7347	13.1621	8.78185	11.265	7.60644	9.52276
25	36.9701	33.946	34.5587	36.2318	31.9266	28.1152	35.2279	32.6728	29.9777	27.0155	24.9033	20.4414	17.352	14.1889	12.2293	7.43769	6.12778	2.53781	1.84771	4.17311	6.56223	3.06795	1.34753	0	1.31512	4.66699	7.77501	11.3268	14.7738	18.0795	21.6153	24.3937	26.861	29.2693	30.8005	33.854	32.9322	29.6674	28.1619	22.5094	23.2179	19.0754	17.2592	13.412	10.8136	6.5538	8.05013	4.12759	7.05503
26	31.6994	28.4208	28.7176	30.7507	27.0324	22.3622	29.4724	26.9896	24.5753	21.7317	20.0752	15.1751	13.6848	8.95845	8.23467	2.64345	2.86431	1.98843	3.67118	2.20774	6.23463	6.3961	2.72408	1.31512	0	1.31143	2.58333	7.24579	10.2438	13.3446	16.7974	18.9669	21.0405	23.1236	24.5467	27.6079	26.3069	22.9539	21.7606	16.1036	17.4892	13.1151	12.3562	8.21048	6.91402	3.55393	5.49752	2.1152	5.97017
27	31.0468	28.0308	28.9277	29.9415	25.5525	22.1648	28.9192	26.0928	23.1498	20.2702	18.0689	13.8889	9.94039	7.74884	5.21036	2.43443	2.67362	3.49437	7.20492	8.57508	12.3029	10.3555	7.2979	4.66699	1.31143	0	1.33608	4.33577	7.7978	11.1325	14.6614	17.6327	20.2333	22.9266	24.8557	27.6586	27.152	24.1154	22.1028	16.4986	16.7695	12.6627	10.3602	7.17869	3.96711	2.55021	2.1822	1.51196	5.42768
28	27.5005	24.3587	24.8684	26.0559	22.1501	17.9267	24.442	21.4462	18.443	15.7675	13.9855	9.51075	7.11342	3.87914	2.65667	2.03158	4.01183	5.2714	8.65335	8.59756	13.1911	12.866	9.17485	7.77501	2.58333	1.33608	0	1.31012	3.89056	6.81408	10.1874	12.7867	15.4077	17.964	20.1755	22.8021	21.9443	18.9004	17.0193	11.3497	11.7612	7.60536	6.18273	2.50558	2.38098	2.63468	2.98523	5.15404	7.03484
29	26.1107	23.1444	24.17	24.361	20.2816	17.0731	23.115	19.9066	16.5868	13.9438	11.4314	7.78625	3.24628	2.48052	1.96774	3.80967	7.50898	9.08486	12.646	13.3675	17.9332	16.9974	13.5467	11.3268	7.24579	4.33577	1.31012	0	1.37055	4.22389	7.95591	11.1831	14.0006	17.0308	19.3288	21.9078	21.7571	19.2446	16.4627	11.3668	10.5315	6.82856	3.86772	2.54329	1.96921	4.04173	2.88617	6.45751	8.15629
30	23.0403	19.9309	20.7332	20.9299	16.8229	13.6258	19.3487	16.1611	12.9069	10.1235	7.91437	3.96957	2.45851	1.90042	3.86262	5.26671	9.1359	11.6407	15.0686	15.7022	20.5219	20.2387	16.634	14.7738	10.2438	7.7978	3.89056	1.37055	0	1.32462	4.49843	7.79595	10.5173	13.8073	15.9243	18.5374	18.6538	16.2477	13.4306	8.3901	7.66092	3.86525	2.35329	2.36678	3.57923	7.4039	6.27783	10.3768	11.9935
31	22.2325	19.1655	19.7235	19.6245	15.5687	12.8637	17.514	13.9243	9.97212	8.12345	6.36387	2.53115	2.83401	3.88255	5.94123	9.19989	13.0553	15.4312	18.737	18.8171	23.7259	23.5789	19.9118	18.0795	13.3446	11.1325	6.81408	4.22389	1.32462	0	1.31407	4.70086	7.99785	11.3001	13.8814	16.2738	15.8225	14.5964	11.0705	7.35596	4.41902	2.75016	2.04824	3.97457	5.36652	9.22867	7.99771	12.7736	14.0432
32	19.3508	16.3886	16.3368	16.0127	12.1539	10.365	13.667	10.0947	6.14552	4.30924	2.75093	2.08175	4.24779	5.60627	9.37369	12.0546	15.8513	18.5821	21.7253	21.875	26.8461	27.0001	23.3196	21.6153	16.7974	14.6614	10.1874	7.95591	4.49843	1.31407	0	1.32828	4.61809	8.05611	10.6033	12.8972	12.6967	12.2129	8.26747	5.70966	2.35617	2.31853	3.72091	7.29179	9.15652	13.0168	12.4041	16.7695	17.9823
33	17.624	14.6162	13.9258	13.7143	10.3148	8.2632	10.4205	6.90848	2.43679	2.53544	2.7627	2.78447	6.59632	7.66792	12.3641	15.0103	18.655	21.2225	23.9559	23.6495	28.7523	29.4611	25.7497	24.3937	18.9669	17.6327	12.7867	11.1831	7.79595	4.70086	1.32828	0	1.34817	4.39344	7.18048	9.38812	8.57378	8.25002	4.2874	2.60891	2.11475	3.68546	5.75713	8.34166	11.9606	15.7728	15.7894	19.9004	20.8902
34	14.3992	11.5283	10.3337	10.5907	7.46838	5.43069	7.15762	3.71167	2.53212	2.03792	4.0873	2.43443	7.88207	9.16718	13.8266	16.633	20.0962	22.985	25.3674	25.1844	30.1226	31.1203	27.9274	26.861	21.0405	20.2333	15.4077	14.0006	10.5173	7.99785	4.61809	1.34817	0	1.32105	3.71684	5.89255	6.41629	6.50587	2.55869	2.40337	3.73397	6.01733	9.34781	10.197	15.2701	19.0336	18.8124	22.9378	24.2089
35	13.8246	11.1261	9.27828	9.91551	7.57373	4.62199	4.58143	3.09398	2.91288	3.90248	7.62843	5.17877	11.3192	11.9009	16.648	19.0449	22.6471	25.3832	27.6147	27.0413	32.0869	33.2178	30.077	29.2693	23.1236	22.9266	17.964	17.0308	13.8073	11.3001	8.05611	4.39344	1.32105	0	1.30532	2.75838	2.16139	2.9886	1.93668	3.53759	5.43009	8.05078	11.9778	12.0516	18.0503	21.6499	21.8924	25.7533	26.7225
36	10.6422	7.84657	5.85547	7.92669	6.5249	2.30288	5.14859	4.05596	4.98871	5.02965	8.81838	6.86936	12.5397	13.4031	17.4716	19.9966	23.2243	26.2357	28.1875	28.0236	32.6913	33.9511	31.314	30.8005	24.5467	24.8557	20.1755	19.3288	15.9243	13.8814	10.6033	7.18048	3.71684	1.30532	0	1.26368	2.62578	2.13246	3.19683	6.32335	8.67999	10.8637	14.9747	14.2334	20.7146	24.3533	24.2523	28.173	29.4803
37	11.6138	9.78811	6.68054	7.63453	7.6978	3.25736	2.93919	4.68691	6.20688	6.80192	11.035	9.49897	15.2317	16.3389	20.6409	23.2545	26.6326	29.5759	31.6395	31.2195	36.0767	37.3327	34.4967	33.854	27.6079	27.6586	22.8021	21.9078	18.5374	16.2738	12.8972	9.38812	5.89255	2.75838	1.26368	0	1.33841	2.96897	4.8963	8.57275	10.6811	13.1741	17.2122	16.8363	23.1596	26.7724	26.8202	30.717	31.8632
38	15.1884	12.762	10.1665	11.6425	10.7437	6.22052	5.47946	5.5443	5.43009	8.28147	12.0815	10.0096	16.2357	16.7258	21.3224	22.9945	26.9088	28.8188	30.8466	29.3462	34.4469	35.9707	33.222	32.9322	26.3069	27.152	21.9443	21.7571	18.6538	15.8225	12.6967	8.57378	6.41629	2.16139	2.62578	1.33841	0	1.3672	2.85218	6.18155	8.19325	12.397	15.983	15.5997	22.3155	25.4691	26.4953	29.935	30.245
39	14.9177	12.7177	10.2612	12.25	11.3952	7.15482	8.37354	8.36426	8.90575	9.67423	13.1256	8.64199	15.0358	13.7751	18.7169	19.5673	23.6236	25.39	27.3481	25.8569	30.9017	32.4553	29.8253	29.6674	22.9539	24.1154	18.9004	19.2446	16.2477	14.5964	12.2129	8.25002	6.50587	2.9886	2.13246	2.96897	1.3672	0	1.30491	4.08112	7.84849	9.97351	14.225	12.5537	19.7734	22.826	23.9728	27.0947	27.52
40	16.5162	13.5722	11.7208	13.6295	11.2013	7.62986	9.60482	7.60964	6.17669	6.70008	9.24706	5.28073	11.7164	11.4657	16.3057	18.2444	21.9969	24.273	26.4692	25.3475	30.5093	31.7927	28.7391	28.1619	21.7606	22.1028	17.0193	16.4627	13.4306	11.0705	8.26747	4.2874	2.55869	1.93668	3.19683	4.8963	2.85218	1.30491	0	1.32411	3.16466	7.14262	11.1033	10.7084	17.2038	20.5485	21.2931	24.8664	25.4365
41	17.5828	14.133	13.5277	14.9941	11.7745	7.80316	11.8858	8.85599	6.62576	6.7245	7.98235	3.10824	8.52901	6.40953	11.4018	12.83	16.6271	18.7835	20.9683	19.6229	24.8518	26.1275	23.0647	22.5094	16.1036	16.4986	11.3497	11.3668	8.3901	7.35596	5.70966	2.60891	2.40337	3.53759	6.32335	8.57275	6.18155	4.08112	1.32411	0	1.32457	2.27679	6.7823	5.05291	11.8782	15.0922	16.0539	19.3114	19.978
42	20.2004	16.9733	16.1331	16.9827	13.5918	10.4802	13.4216	10.1538	6.88635	6.92168	7.07194	4.15646	8.37096	7.71798	12.5225	14.5077	18.2209	20.3329	22.8527	21.8582	27.1422	28.0163	24.333	23.2179	17.4892	16.7695	11.7612	10.5315	7.66092	4.41902	2.35617	2.11475	3.73397	5.43009	8.67999	10.6811	8.19325	7.84849	3.16466	1.32457	0	1.30119	4.53608	6.44968	10.8576	14.3134	15.1723	18.8804	19.2783
43	20.0138	16.5764	16.5635	17.6698	13.703	9.78438	15.46	12.1792	9.32473	6.81824	6.15085	2.31965	4.93754	3.03961	7.86509	9.44214	13.3528	15.5548	17.9579	17.4718	22.5529	23.4521	20.0534	19.0754	13.1151	12.6627	7.60536	6.82856	3.86525	2.75016	2.31853	3.68546	6.01733	8.05078	10.8637	13.1741	12.397	9.97351	7.14262	2.27679	1.30119	0	1.34445	2.22739	7.40922	10.7285	11.6608	15.0978	15.5715
44	24.7738	21.5132	21.5002	21.905	18.0116	14.8323	19.1807	15.6285	11.5515	10.3193	9.29066	6.57063	7.01875	6.04539	8.78247	9.72752	13.3744	15.1336	18.2435	17.6033	22.5657	22.591	18.9187	17.2592	12.3562	10.3602	6.18273	3.86772	2.35329	2.04824	3.72091	5.75713	9.34781	11.9778	14.9747	17.2122	15.983	14.225	11.1033	6.7823	4.53608	1.34445	0	1.25475	2.85777	7.18918	8.24782	11.8491	11.2852
45	23.3195	19.8649	19.8432	21.4247	17.7525	13.1434	19.3106	16.366	13.8247	11.5701	10.5638	5.73182	6.08918	2.41988	6.01855	6.2551	9.78379	11.4636	14.1199	13.3048	18.2488	18.4288	14.7347	13.412	8.21048	7.17869	2.50558	2.54329	2.36678	3.97457	7.29179	8.34166	10.197	12.0516	14.2334	16.8363	15.5997	12.5537	10.7084	5.05291	6.44968	2.22739	1.25475	0	1.33757	4.09006	6.37756	9.05094	8.94757
46	29.0212	25.764	26.2639	26.9006	22.8219	19.1628	24.9352	21.4616	17.4886	15.6588	13.9189	10.044	7.9595	6.51031	7.03757	6.77543	8.96262	9.87191	13.0948	13.2816	17.6508	16.5878	13.1621	10.8136	6.91402	3.96711	2.38098	1.96921	3.57923	5.36652	9.15652	11.9606	15.2701	18.0503	20.7146	23.1596	22.3155	19.7734	17.2038	11.8782	10.8576	7.40922	2.85777	1.33757	0	1.31047	2.85971	5.34342	5.7416
47	32.5695	29.2925	29.7584	30.6241	26.5721	22.7094	28.6995	25.2726	21.5393	19.5082	17.7936	13.8466	11.2751	8.95097	8.3987	6.68442	8.2064	8.4519	10.4481	10.4559	13.9154	12.2898	8.78185	6.5538	3.55393	2.55021	2.63468	4.04173	7.4039	9.22867	13.0168	15.7728	19.0336	21.6499	24.3533	26.7724	25.4691	22.826	20.5485	15.0922	14.3134	10.7285	7.18918	4.09006	1.31047	0	1.31186	2.70386	2.81637
48	31.0037	28.0048	28.9419	29.2598	25.1652	21.8828	27.9164	24.6732	21.0438	18.6363	16.0514	12.3891	7.96385	7.34086	5.17286	5.82663	5.99965	8.21128	11.6384	12.3709	16.2121	14.0397	11.265	8.05013	5.49752	2.1822	2.98523	2.88617	6.27783	7.99771	12.4041	15.7894	18.8124	21.8924	24.2523	26.8202	26.4953	23.9728	21.2931	16.0539	15.1723	11.6608	8.24782	6.37756	2.85971	1.31186	0	1.2948	2.97212
49	34.9255	31.883	32.7054	33.5842	29.4011	25.7382	32.117	28.9546	25.4815	23.0061	20.8709	16.9228	12.9913	11.1626	8.61374	6.62583	6.12627	6.18608	8.4861	9.26065	12.8713	9.88347	7.60644	4.12759	2.1152	1.51196	5.15404	6.45751	10.3768	12.7736	16.7695	19.9004	22.9378	25.7533	28.173	30.717	29.935	27.0947	24.8664	19.3114	18.8804	15.0978	11.8491	9.05094	5.34342	2.70386	1.2948	0	1.28985
50	37.0792	33.8955	34.5388	35.3587	31.3019	27.5178	33.7069	30.3742	26.6574	24.4558	22.4389	18.4609	14.8822	13.1217	11.4508	10.0165	10.4394	10.4294	12.2171	12.4694	15.2686	12.5842	9.52276	7.05503	5.97017	5.42768	7.03484	8.15629	11.9935	14.0432	17.9823	20.8902	24.2089	26.7225	29.4803	31.8632	30.245	27.52	25.4365	19.978	19.2783	15.5715	11.2852	8.94757	5.7416	2.81637	2.97212	1.28985	0
51	38.5368	35.1989	35.5024	36.909	33.0051	28.6753	35.0489	31.7935	28.0146	26.217	24.6001	20.3593	17.9633	15.2652	14.5115	10.0841	11.1234	9.65245	10.0721	9.17306	11.8205	10.4975	6.34087	5.95425	4.58768	6.71075	7.55666	10.6348	14.1571	16.0207	19.7434	22.1667	25.4746	27.7104	30.2447	32.7558	30.3563	27.5825	26.1656	20.645	20.2175	16.3755	12.5861	10.0314	8.26389	3.97497	6.81865	4.15621	1.27421
52	33.2387	29.8826	29.8927	31.8164	28.0893	23.4199	29.8186	26.7321	23.5586	21.5676	20.1334	15.559	13.9823	10.2058	10.298	5.06677	8.10076	6.5791	8.5307	6.85972	10.5811	10.7084	6.33618	6.35026	2.95776	4.81099	2.90177	7.08478	9.98316	12.3038	15.8639	17.6624	20.416	22.2596	24.4744	27.1587	24.8714	21.8316	20.4745	14.8439	15.4599	11.8578	10.2384	6.46543	5.75764	2.73824	5.88591	5.30202	3.59667
53	36.2839	32.9643	33.225	35.0777	31.3874	26.6862	33.5258	30.691	27.7324	25.2783	23.646	18.9597	17.1895	13.1191	12.6398	7.15248	8.85363	6.11482	5.70217	3.79463	6.35256	6.43782	2.44459	4.11258	2.58274	5.89541	5.88769	10.2329	13.4367	16.0652	19.6307	21.8917	24.5683	26.5924	28.5927	31.3594	29.5347	26.335	25.0298	19.3305	20.0827	16.1892	14.4018	10.3632	9.14655	4.69217	8.00477	5.17706	5.91459
54	34.163	30.9249	30.8661	33.325	29.9364	24.8333	31.6546	29.0046	26.405	24.1514	23.0044	18.0775	17.5522	12.5185	12.9688	6.95854	9.51905	6.90546	6.68188	2.45663	6.1579	8.14556	4.7751	7.94581	3.76654	8.53625	6.60792	11.6007	13.8328	16.0442	19.1273	20.6584	22.742	24.4151	26.0048	28.9539	26.4962	23.2034	22.4738	16.6953	18.4426	14.8369	14.0504	9.99048	10.62	7.16167	10.4337	8.72857	8.53609
55	33.9258	30.6115	30.294	32.7142	29.3471	24.2793	30.6871	27.9573	25.3327	23.4717	22.7101	17.6548	17.9634	12.8194	14.7734	9.3747	13.1048	10.846	11.2392	6.39411	9.31256	12.3008	8.63002	12.0244	7.6718	11.5876	8.06981	12.9184	13.9253	15.8906	18.3255	19.6739	21.4879	23.0149	24.5558	27.4757	24.4738	21.2833	20.7909	15.1289	16.9265	13.8178	13.3716	9.67192	11.4411	8.78433	12.6752	12.3686	10.8617
56	29.8649	26.4484	26.5603	28.1251	24.3389	19.8119	26.1206	23.0034	19.8624	17.7622	16.5521	11.9841	11.4398	7.44758	9.04458	6.28856	10.0836	9.94302	12.4356	9.23048	13.7162	15.6218	11.8622	11.0789	6.3305	5.54318	2.73391	5.11627	6.99363	8.87327	12.1759	13.9822	16.75	18.7107	21.0593	23.649	21.1946	18.0236	17.1369	11.507	11.995	8.209	6.80151	2.85625	3.28077	2.72496	5.66795	7.22635	5.78681
57	30.1851	27.3376	26.7022	29.4158	26.4913	21.2711	27.3804	24.6524	22.1997	20.821	20.641	15.5374	17.112	12.0535	15.3688	10.1029	14.8491	12.9796	14.3315	10.1644	14.9219	17.0464	13.829	15.5326	9.92443	13.1684	9.3059	13.5434	13.1631	14.7688	15.9598	16.899	18.0902	19.3637	20.7467	23.5762	20.0698	17.0021	16.6581	11.5046	13.3921	11.0861	11.7234	8.37846	11.7782	10.3167	14.0923	14.6911	12.8828
58	29.8347	27.1334	26.7275	29.4975	26.679	21.299	28.053	25.8602	23.9271	21.769	21.1361	15.7623	16.4892	11.0722	13.399	7.46295	11.747	9.43687	9.78458	5.33386	10.0633	12.0403	9.57318	12.0817	6.22579	12.1509	8.56812	13.4377	13.4196	15.7301	17.591	18.6213	19.6619	21.0192	21.9635	24.9975	22.33	18.9104	18.8533	13.2498	16.0401	12.5601	13.8514	10.0523	13.0707	10.6097	13.7271	12.9063	13.4478
59	26.7628	23.4485	23.2164	25.7566	22.5321	17.2892	24.07	21.7752	19.9141	17.4857	16.7513	11.3625	12.1879	6.81391	8.73392	3.40306	7.63034	5.94981	7.38579	4.51313	9.86743	11.1736	8.66782	8.96924	2.70823	6.75127	2.95085	7.97914	9.39884	11.9092	13.7014	14.683	15.6281	17.2371	18.3605	21.4036	19.4115	15.9404	15.4133	9.74103	12.7625	8.37851	10.3106	6.13409	7.80472	6.09479	8.6408	8.4631	9.82304
60	24.3094	21.1148	20.6547	23.3032	20.2863	14.9965	21.473	19.2585	17.3473	15.5898	15.3424	9.89038	11.926	7.16926	11.1324	7.41594	12.7091	11.6839	13.3881	10.4059	15.6719	17.3427	14.9227	15.6187	8.7953	12.4039	7.56499	11.0939	9.4973	11.4605	12.1046	12.351	12.8742	14.0243	15.1478	18.053	15.0354	11.7344	11.5489	6.22978	9.31802	6.73242	9.12931	5.01352	10.6977	11.4012	13.758	14.7907	15.0948
61	22.4337	19.8135	19.3868	22.2069	19.5569	14.3268	21.2235	19.7148	18.9585	16.3739	15.9081	10.6573	12.0235	7.91081	11.0606	7.47849	12.2871	12.481	13.8682	11.5406	15.9369	17.9901	16.4875	17.4093	10.5587	14.0493	9.89409	13.3013	11.6748	14.0183	14.3937	14.234	14.0204	15.2033	15.3552	18.4398	16.2949	12.7036	13.1818	7.97889	12.4717	8.53706	12.8313	7.6798	13.523	13.9736	16.0355	16.9585	17.8505
62	22.7671	19.5532	19.5797	22.1764	18.9348	13.8733	21.1913	19.5138	18.5273	15.1606	14.2642	9.20792	9.30362	5.16097	6.95827	2.61985	6.84197	7.09288	8.42155	8.32887	12.5826	13.8496	11.9109	12.198	6.44793	9.42418	7.05022	10.0054	9.52933	11.9641	13.2743	14.0502	13.8477	15.87	15.9496	19.4584	18.852	15.3262	14.7651	9.12613	13.1042	7.86793	12.0443	6.70264	11.6541	11.7312	12.6888	12.8042	15.7539
63	21.4366	18.0171	18.0866	20.1848	16.7958	11.6921	18.7035	16.5096	15.0347	12.0418	11.1667	5.77688	7.00507	2.727	5.31945	2.53751	6.78264	7.91721	10.4137	10.094	15.1661	15.8376	12.3898	11.7169	5.52198	6.607	2.86803	5.5855	4.89367	7.69918	9.71143	10.3636	10.6212	12.7501	13.6198	16.8245	16.3495	13.0205	11.7685	6.26857	9.54647	4.22908	6.73286	2.64404	6.35493	7.34851	8.53087	9.96357	11.4685
64	17.933	14.7287	14.7403	17.3689	14.2782	9.41103	16.7505	14.8097	13.496	11.5042	11.4254	6.03998	8.34603	4.94915	8.4371	7.11904	11.6122	12.7535	14.6537	13.5276	18.4841	19.8599	17.2919	17.3858	10.567	12.8247	8.15252	10.3564	7.79504	9.32841	8.98355	8.75197	8.76135	9.98373	10.7764	13.8233	12.0119	8.48725	8.13372	2.69074	7.49267	3.14571	8.23886	3.04938	10.8745	13.1361	14.3657	16.0899	17.4765
67	15.3099	11.8466	11.3069	13.9312	11.0228	5.6568	12.5717	11.3967	10.6426	7.53347	7.30391	2.70633	5.26683	3.83288	7.45462	9.28667	12.4708	15.4413	17.4932	17.8948	22.4176	23.4235	20.733	20.2184	14.1997	14.7147	10.6389	10.7783	8.34369	8.64555	7.79221	6.83714	5.78663	7.83442	6.8842	10.5634	10.8432	7.97926	7.06326	2.57524	7.0973	3.27596	9.35308	5.58015	12.8412	15.62	15.4586	18.4644	20.4149
68	12.8068	10.8004	9.5719	12.5751	11.2597	6.81639	12.2908	12.425	13.1672	10.4311	11.7039	7.7217	10.7819	8.85563	12.0942	12.4611	16.0108	18.22	19.59	19.0135	23.0105	24.8815	23.1083	23.3414	16.9101	18.8738	14.9336	15.6587	13.3043	13.9298	12.9794	11.0459	8.98338	9.61461	6.56032	9.98068	10.4129	7.21466	8.87629	5.47952	11.0109	8.17807	14.4139	9.99607	17.4105	19.9018	20.2246	22.558	24.5252
69	10.215	6.80278	6.52256	9.18635	6.89436	2.99079	8.43595	8.85328	10.0369	6.70413	8.67482	6.42214	9.14735	9.11378	12.3618	14.7487	17.6283	20.6257	22.2771	22.4911	26.6749	28.0123	25.9339	25.7769	19.6175	20.4503	16.413	16.0553	13.2177	13.0237	11.5883	9.98442	7.15011	7.03085	3.36456	7.23197	8.59327	6.56144	7.64462	6.48858	10.9777	8.92216	14.7328	11.6761	18.2388	21.4067	20.8545	24.2352	26.1595
70	12.2234	9.03978	8.24582	9.39047	5.84001	2.68114	7.0036	4.82872	5.13643	2.25368	4.38786	2.5407	6.21479	7.0261	10.8553	13.8837	16.9295	20.1366	22.4639	22.4877	27.1543	28.2863	25.5342	24.7185	18.795	18.6104	14.2057	13.4059	10.102	9.46911	7.21653	5.53689	2.82712	3.44882	2.32079	5.42187	5.44915	2.53507	3.60624	2.70665	6.88514	5.76688	11.2296	9.00064	15.3871	18.9215	18.2761	22.089	23.8071
71	11.4325	10.0449	7.48588	10.6271	10.394	6.24432	9.20827	10.0085	11.0664	9.65827	12.4715	8.3429	13.4009	12.4387	16.472	17.1426	21.006	23.0573	24.5824	23.7769	28.2206	29.8704	27.9095	28.1256	21.439	23.2491	18.6117	19.0235	16.1892	15.5356	13.3088	10.121	7.57968	6.58755	3.05549	5.85216	6.15687	3.17893	5.2946	5.90871	10.3967	10.1377	15.848	12.7745	20.3747	23.482	23.8376	26.7946	28.1212
72	11.694	11.1162	7.81268	11.0714	11.2533	7.1145	8.39475	10.3239	11.175	11.2096	15.261	11.0556	16.8769	16.0953	20.43	21.226	25.1754	27.1636	28.8554	27.668	32.3683	34.0459	31.8539	31.936	25.1688	26.6856	21.7088	22.1627	19.2042	18.0471	15.6003	11.8846	9.39741	5.41975	2.81891	2.56225	2.91228	2.47138	4.98813	8.3318	11.8559	12.9484	18.0093	15.4727	23.0839	26.1447	26.9735	30.0542	30.8391
73	8.27529	10.1733	5.45197	10.1624	11.5203	7.85611	9.50374	11.6978	13.2066	12.2559	16.5856	13.1607	17.606	16.4981	20.0892	20.5885	24.1705	26.3168	27.6963	27.1413	31.0422	32.8685	31.3389	31.5317	25.1261	27.0326	22.6431	23.3397	20.6233	20.3706	18.0345	14.5492	11.6417	8.4647	4.87511	6.20276	7.46616	5.92361	8.42085	10.755	15.038	14.7587	20.7234	17.0376	24.7609	27.6585	28.0286	30.6055	32.2516
74	9.98518	13.512	7.15216	12.804	14.6793	11.4751	11.6204	14.4949	16.3943	16.0459	20.4821	16.6278	22.3094	21.4612	25.5596	25.9413	29.9255	31.7521	33.1818	31.8699	36.2695	38.1438	36.397	36.7832	29.9604	31.9171	27.0066	27.7085	24.7812	23.713	21.1658	17.4213	14.9843	11.2658	7.84017	7.30539	8.59579	7.65473	10.6834	13.7902	17.427	18.5443	23.6642	20.9135	28.6496	31.5935	32.4872	35.4031	36.1578
75	8.88946	13.3434	6.53988	11.33	14.1443	11.947	10.6345	14.6851	17.5151	17.0243	21.9642	19.4959	25.0504	25.1006	29.134	30.3855	34.0129	36.3372	37.828	36.9001	41.2732	43.0424	41.186	41.3616	34.662	36.1462	31.3571	31.4517	28.5154	26.7528	23.728	20.0334	16.8832	12.9582	9.55067	8.54043	10.1422	10.4748	13.3049	17.1545	20.44	22.3203	27.1187	25.1437	32.5991	35.8193	36.3521	39.644	40.5999
76	10.4883	15.7451	9.10343	14.3393	16.9094	14.6326	13.7877	17.7122	20.2825	19.7322	24.5743	21.7722	27.2458	26.9005	30.9321	30.8863	34.9784	36.5195	37.7676	36.1829	40.3745	42.4179	40.9991	41.5693	34.7723	37.0948	32.1582	33.12	30.2015	29.1195	26.2149	22.5521	19.4645	15.642	12.1086	11.4423	12.9312	12.741	15.8188	18.917	22.6503	23.9757	28.9418	26.165	33.946	36.7525	37.8419	40.4913	41.1542
77	8.26242	12.5645	7.37623	12.8363	14.5497	12.4478	13.5069	17.1017	19.3444	17.5296	22.1936	18.7788	23.613	22.3374	25.946	25.7428	29.5749	31.2166	32.3693	31.307	35.1312	37.161	35.9678	36.4186	29.9894	32.4114	27.9	29.0033	26.2468	25.9428	23.7461	20.3573	17.7171	14.4446	10.8904	11.6404	12.7019	11.3294	14.075	16.0305	20.4232	20.2585	25.9949	22.2934	30.1707	32.8893	33.6321	35.8707	37.2739
78	4.78957	9.03103	2.48485	7.92862	9.70723	6.90059	6.70312	10.1721	12.9462	11.9479	16.9423	14.9846	20.0877	20.7544	24.6268	26.7787	29.7774	32.2995	33.7495	33.6845	37.5249	39.1521	37.6935	37.6807	31.2597	32.184	27.5923	27.195	23.9752	22.4563	19.3626	15.9586	12.553	9.41482	5.95549	4.98305	7.60763	7.5781	10.2423	14.0521	17.0187	18.3872	23.3505	21.5412	28.6825	32.105	32.1281	35.7169	37.0843
79	4.51573	9.87383	5.56182	10.6586	12.8059	12.0449	13.2214	16.9795	20.0222	17.4115	22.2851	20.2238	23.9573	23.6006	26.4255	27.3168	30.1396	32.3665	33.6762	33.6129	37.1872	38.8712	37.8489	37.8776	32.2234	33.7643	30.3295	30.5457	28.0248	27.68	25.1937	22.0859	19.0325	16.4424	12.3099	13.1366	15.4189	14.3319	16.7689	18.7709	22.9475	22.5742	28.554	25.0328	32.502	35.2731	35.3126	37.6775	40.0683
80	7.16805	11.1197	7.49767	12.4512	13.8586	11.8978	14.365	17.5061	19.6351	16.755	20.6241	17.8605	21.4301	20.3768	23.3442	23.5785	26.7738	28.706	29.9435	29.5774	33.2346	35.0122	33.9803	34.1608	28.3092	30.215	26.5877	27.2931	24.9124	24.9704	23.0536	20.3259	17.3984	15.838	11.5109	13.5317	15.4171	13.1098	15.6687	15.7705	20.7628	19.4305	25.5688	21.5032	29.0774	31.5806	31.9413	34.02	36.2478
81	5.46492	7.02702	4.66335	8.28736	9.11106	6.45189	9.80275	11.779	13.7919	11.0353	15.4237	12.9375	16.7793	16.3432	19.5486	20.8708	23.8772	26.4528	27.9611	28.0391	31.956	33.4859	31.8512	31.7907	25.7583	27.0982	23.2248	23.374	20.7093	20.4021	17.9866	15.0466	12.057	10.3034	5.90187	8.90958	10.5768	8.66418	10.7609	11.7822	16.025	15.3352	21.356	17.8862	25.2269	28.1662	28.1094	30.8887	32.9943
82	7.47786	6.86502	7.76719	10.4314	9.55377	7.75873	13.7842	15.7712	17.7617	13.5453	16.4985	14.8895	15.9137	15.2697	16.8276	17.3922	19.5073	21.7684	23.1252	23.8077	27.152	28.5271	27.5565	27.2137	22.5014	23.6053	21.2149	21.4466	20.1627	20.743	20.0199	18.024	15.1886	15.0298	10.9001	14.1557	15.6998	13.0231	15.3252	13.8918	19.0663	16.3256	22.4395	17.9017	24.3239	26.1372	26.1404	27.718	30.6694
83	8.18394	5.94923	6.65208	9.47238	7.3932	5.06143	11.7509	13.2815	14.5941	10.4349	13.1886	10.9045	13.4624	12.619	15.1505	15.2633	18.4842	20.2818	21.5511	21.4166	25.1344	26.7777	25.6116	25.7409	20.0547	21.9758	18.8606	19.3377	17.2662	17.313	16.035	14.0173	11.3061	11.5728	7.73452	11.3441	12.7192	9.82919	11.6812	9.80205	14.8739	12.4621	18.608	14.6328	21.6343	23.7537	24.0242	25.8196	28.4211
84	5.21448	2.29695	2.21938	5.04738	4.98595	2.59481	6.10255	7.8285	9.54207	6.92801	11.6121	9.3471	13.51	14.2159	17.2455	19.9458	22.1573	25.3746	27.0064	27.6004	31.4362	32.7573	31.0142	30.6721	24.9861	25.5034	21.5194	21.1035	17.908	16.9175	14.0833	11.1339	8.19094	6.61807	2.64076	5.44517	7.44852	5.51918	7.35235	8.93692	12.5812	12.79	18.0919	15.9312	22.9291	26.3802	25.8843	29.4075	31.2749
85	3.5751	3.22009	4.04885	6.66121	6.94356	5.81369	11.083	13.4136	16.0497	11.7444	15.5214	14.3827	16.8472	17.316	19.7704	21.921	24.1772	27.1147	28.7091	29.3912	32.9959	34.3383	32.8576	32.5297	27.0732	27.8049	24.483	24.0354	21.4173	21.1988	19.262	17.3062	14.4901	13.9673	9.85658	13.0098	14.9372	13.2067	14.904	14.3622	18.8166	17.2339	23.1253	19.8638	26.6041	29.442	28.9074	31.7981	34.1535
86	6.61865	4.78177	6.70392	9.07918	6.30712	6.43121	12.8056	14.858	16.6653	11.8708	14.5436	13.6627	14.89	15.0783	16.6478	18.8441	20.4142	23.4683	25.0866	26.312	29.7579	30.8628	29.4237	28.6534	24.1124	24.4206	21.4879	21.2972	19.3963	19.6766	18.7394	17.565	15.0969	15.4037	11.5947	14.8512	16.76	14.961	16.4179	14.5723	19.1319	16.2929	22.0563	18.4453	24.4418	26.7741	26.0878	28.5386	31.2783
87	5.08187	3.03441	5.02672	6.58311	2.68498	2.2582	9.15883	10.8476	12.0374	7.31515	9.88868	8.60457	9.89032	10.3689	12.0648	15.0373	16.7523	20.2835	22.1807	23.4646	27.3475	28.2446	26.1837	25.5063	20.4884	20.2707	16.979	16.5375	14.401	14.6802	13.6791	12.5682	10.4223	11.5899	8.32035	11.6851	13.7837	12.6411	12.6935	10.3182	14.3864	11.6183	17.172	14.0105	19.7013	22.3132	21.3215	24.2444	26.8105
88	5.63842	3.91459	7.15738	7.55425	2.52582	5.22404	10.5237	11.8706	12.773	8.48494	10.6327	11.5079	11.8421	13.6858	14.5253	17.8615	19.2702	23.0665	25.2995	27.1726	30.8899	31.4293	29.2955	28.0306	24.0901	22.3849	19.5763	18.4849	16.6676	16.8095	15.6603	14.7134	13.4297	14.255	11.8937	14.7584	17.1128	16.5637	16.2066	14.9589	17.879	15.6654	20.4512	17.7572	22.5723	25.2172	23.1112	26.3448	29.32
89	8.11275	6.59602	9.40519	10.5775	5.89164	7.87156	13.7395	15.4131	16.3599	11.3978	13.3992	13.3954	12.826	13.9024	14.269	16.78	17.8977	21.5767	23.4833	25.5974	28.9205	29.4503	27.7404	25.979	23.0737	21.6559	19.2701	18.8812	17.604	18.2092	18.119	17.3843	16.1921	17.2932	14.6544	17.6806	20.0043	19.1027	18.9403	16.8508	20.3916	17.1043	21.7453	18.1555	22.9949	25.0078	23.1633	25.6397	28.9911
90	9.96283	7.37328	10.0302	11.6193	7.0643	6.6532	14.1093	15.4734	15.9276	10.6105	12.3954	11.6075	11.4914	12.4748	13.0529	15.6415	16.9471	20.5703	22.4039	24.2093	27.6752	28.4141	26.6406	25.4284	21.6061	20.794	18.0749	17.8126	16.2702	16.8373	16.6112	15.8246	14.1795	15.9319	12.7854	16.4097	18.3213	16.6058	16.6282	14.096	18.0659	14.8377	20.0141	16.3161	21.5517	23.6981	22.2815	24.808	27.9048
91	11.1505	8.42743	9.22022	11.937	9.17652	5.86065	13.3669	14.2674	15.053	10.45	11.9833	9.06277	10.6243	9.39926	11.5844	12.3273	14.102	17.1001	18.7263	19.6265	23.3147	24.5515	23.0283	22.0978	17.5051	18.4509	15.9106	16.0632	14.2869	14.8422	14.5121	13.2093	10.9972	12.6326	9.77538	13.7899	14.8518	11.9267	12.3881	8.67098	13.7712	10.1131	16.1876	11.7527	18.464	20.7767	20.7872	22.5858	25.3693
92	15.7477	13.3718	15.5906	17.6916	13.7881	11.8207	19.7723	20.6218	20.8853	15.5724	16.2851	13.4838	12.5595	11.7411	11.539	12.2096	12.6056	14.5808	15.8444	17.772	20.3406	21.1799	20.5633	18.8035	17.0539	17.3413	16.1812	16.8244	16.4645	18.2104	18.7913	19.1267	17.7651	19.7961	16.8674	20.8255	22.2174	19.1872	19.6065	15.4591	20.2572	15.5423	20.3757	15.3835	20.527	21.4042	20.5576	21.4978	25.1727
93	16.9726	14.7885	14.985	17.9092	15.123	11.1745	18.4646	18.2913	18.4983	14.4662	14.9854	10.6765	11.4532	8.95498	10.38	8.7955	11.2569	12.6177	13.8088	14.8325	17.9313	19.1521	18.3841	17.9484	13.4367	15.5633	13.025	14.7442	13.4662	15.4082	15.5551	14.8963	13.5083	15.1121	13.414	17.2231	17.1006	13.6931	14.1434	9.035	14.6374	10.1744	15.7743	10.1846	16.7923	17.7994	18.7246	19.4355	22.2897
94	20.116	18.1133	19.2721	21.9716	18.8249	15.6112	23.4292	23.5622	23.8443	19.0255	19.339	15.5829	15.0669	12.3423	12.0397	10.3278	11.6172	12.4663	13.3033	13.9909	16.7537	18.1321	17.9301	17.2602	14.0967	16.2286	15.1871	17.2404	17.2354	19.9194	20.6627	20.9879	19.3698	21.2152	18.8942	22.7718	23.1573	19.9849	20.5655	15.6415	20.9795	16.0844	20.7176	15.3144	19.886	19.9195	20.2617	20.0905	23.758
95	20.2737	18.5221	17.8965	20.8841	18.6974	13.8558	20.5194	19.6382	19.6082	16.57	16.8158	11.9442	12.8888	9.15718	11.5356	8.19909	11.3821	11.4157	11.3729	10.9737	13.3931	15.2121	15.7786	15.8807	11.8071	15.0852	12.0624	14.5828	13.2935	15.5966	16.1806	15.5985	14.4901	15.7386	14.6627	17.9848	16.8978	13.3421	14.2651	9.21282	14.8427	10.5819	15.5566	9.74631	15.9084	16.7179	17.9122	18.4679	20.8988
96	26.0283	24.481	24.9879	27.9759	25.299	21.4632	28.7454	28.3643	28.4844	24.4561	24.3547	19.8342	19.4969	15.736	15.6343	11.2468	12.6101	12.0988	10.9909	10.3088	11.6857	13.8964	15.5665	15.8356	12.2667	17.0451	16.1872	19.8034	20.1075	22.8651	24.2586	24.4441	23.4369	24.9171	23.3569	26.8642	25.8339	22.3344	23.4895	18.3324	23.5195	18.6689	22.5927	17.5642	20.924	20.1505	21.1895	19.9595	23.329
97	26.2203	24.1301	23.9008	26.8295	24.2572	19.3691	26.3818	25.1096	24.4515	21.5245	20.931	15.7425	16.1466	11.5864	13.0488	7.79733	11.1472	10.5095	10.581	8.47634	10.6104	13.5659	13.8221	14.9457	9.01004	14.0963	11.7844	15.8662	15.5401	18.169	19.4291	19.8742	19.4758	20.9512	20.5906	23.8793	22.2538	18.6463	19.2254	13.7949	18.3724	13.7641	17.4825	12.341	16.5978	15.6634	17.3411	16.7545	19.1369
98	30.1207	29.0066	28.8859	31.9595	29.841	25.2968	31.9568	31.0321	30.6659	27.8456	27.5589	22.3824	22.9043	18.2427	19.1519	13.6018	16.0054	14.9411	12.5193	10.1682	11.0526	14.6886	15.3035	17.9968	13.3821	19.411	17.3881	21.8569	21.9853	24.6025	25.8811	26.0509	25.5794	26.7063	25.9999	29.0199	26.8722	23.4146	24.4572	19.6924	24.1517	20.1813	23.5189	18.7472	22.3354	20.7357	22.7975	21.5111	23.6954
99	31.3876	29.1961	28.6733	31.5606	28.9727	23.6973	30.4387	28.5921	27.1389	24.8546	24.2671	18.8189	19.474	14.1138	15.9311	9.69342	12.5982	10.8735	9.59111	6.71734	8.98512	12.3148	12.0137	14.1575	8.58459	14.9618	11.8673	16.7732	17.0232	19.4702	21.2117	22.0932	22.5729	23.8231	24.208	27.2751	24.6244	21.1493	21.5353	16.2982	19.5448	15.921	17.8631	13.7849	16.7007	14.7189	17.3868	16.599	17.79
100	35.2482	34.0611	33.3179	36.3851	34.4677	29.4375	35.7265	34.3418	33.4056	31.4156	31.1983	25.725	26.7715	21.5988	23.3366	17.1836	20.0896	18.2912	15.9884	12.3349	12.3491	17.4248	16.1541	20.8184	15.8584	22.3824	19.5321	24.5303	24.6141	26.9565	28.1894	28.5347	28.6232	29.4217	29.0762	32.0114	28.8308	25.5864	26.4211	22.3144	25.6892	22.6398	25.0322	20.7771	24.3192	21.9134	24.8657	23.6351	24.4899
101	38.8358	37.6928	37.1689	40.2598	38.3403	33.4319	39.8365	38.4693	37.4697	35.4007	35.0481	29.5742	30.3015	25.0892	26.0906	19.6951	21.6102	19.4022	16.1859	12.0923	10.0237	16.1622	14.7579	20.2869	17.0877	23.6772	21.7194	26.9314	27.9633	30.3764	32.0077	32.57	32.7126	33.5742	33.2545	36.1969	33.0135	29.7812	30.5959	26.3763	29.6507	26.5623	28.4819	24.5008	26.3922	23.4039	26.3624	24.3104	24.9886
102	38.1546	36.3919	35.9072	38.8848	36.4588	31.3162	38.0227	36.2939	34.8399	32.6308	31.9981	26.5709	26.9292	21.5769	22.5575	16.0996	18.0505	15.5045	12.2709	7.836	6.2374	12.001	10.364	15.8315	12.8686	19.433	17.8863	23.0881	24.2832	26.7031	28.7551	29.7229	30.3011	31.4271	31.6311	34.6607	31.6488	28.2897	28.7896	23.8706	26.8899	23.6166	24.7742	20.9459	22.1935	18.9924	22.1677	19.9201	20.4931
103	35.4539	33.6475	33.5055	36.4897	33.927	29.1177	36.0565	34.625	33.534	30.9848	30.1954	24.8371	24.8274	19.773	20.0702	13.9197	15.3227	13.2381	9.58068	5.99322	5.36085	10.0402	10.0309	14.4512	11.2211	17.9138	16.8807	21.8056	23.0116	25.6301	27.6884	28.5952	28.7805	30.1015	30.0732	33.1471	30.7195	27.2274	27.8737	22.8223	26.2673	22.281	24.1934	20.2913	21.6495	18.7678	21.1818	18.7806	20.717
104	32.7335	30.9145	31.1793	34.1483	31.2981	26.8693	34.0949	32.7338	31.7128	28.6317	27.6629	22.5533	21.9385	17.2057	16.7351	10.971	11.6476	9.9598	6.81081	5.34791	6.08902	9.01752	10.4497	12.2285	9.10446	15.1701	14.6185	19.1259	20.6057	23.4754	25.7896	26.796	26.9768	28.5989	28.442	31.7391	29.6614	26.1103	26.7806	21.3477	25.0883	20.3661	22.4542	18.4247	19.4632	17.298	19.0434	16.8329	19.8087
105	29.7578	27.4514	27.2513	30.0675	27.162	22.102	29.2262	27.5036	26.0487	23.4479	22.5153	17.1889	17.0899	11.9781	12.6664	6.70339	8.84366	7.83076	5.85494	2.81933	6.18098	8.44252	7.87558	10.2756	5.19977	11.7012	8.90336	14.0126	14.8204	17.3854	19.6658	20.7733	21.5713	23.1837	23.5136	26.7297	24.8175	21.2368	21.2658	15.6744	18.7176	14.4688	15.9337	12.03	13.6825	11.1451	13.8881	12.6753	13.8544
106	28.5316	26.0219	26.8198	29.551	25.9091	22.0447	29.7862	28.7729	28.2013	24.0575	23.0453	18.5782	16.9726	13.0347	11.4847	7.52179	7.24216	6.83057	6.45009	6.24108	8.20964	10.0691	11.0342	11.1377	8.49972	12.1656	12.4319	15.7913	16.6471	19.9915	22.1303	23.6438	23.4662	25.4596	24.7289	28.4683	27.8339	24.2333	24.2992	18.6658	22.6961	17.3826	20.0163	15.2909	17.0644	16.2439	16.7985	15.2263	19.1605
107	24.298	21.7951	22.436	25.2058	21.7837	17.7945	25.4764	24.6387	24.077	19.9162	18.9797	14.5631	13.2295	9.3731	8.75841	5.01896	6.63819	6.56899	7.21779	7.33394	10.8108	12.2282	11.4068	11.8081	7.21221	10.786	10.0722	13.3491	13.6561	16.6858	18.4181	19.7281	19.3954	21.4628	20.4123	24.1912	23.8494	20.29	20.2897	14.6332	18.6147	13.4044	16.6026	11.6517	14.8007	14.2195	14.9915	14.0677	17.6939
108	21.3308	18.9086	21.3485	23.2202	18.5083	16.5623	24.688	23.9826	23.4331	18.6376	17.6817	13.8966	11.7715	9.10064	7.13426	6.75622	6.92596	7.92307	8.96992	10.7478	13.4335	14.3444	13.6911	12.891	10.4008	11.5889	11.2985	12.7895	13.229	16.49	17.9738	19.8222	19.3812	21.7074	20.5071	24.4185	25.0025	21.7727	21.137	15.9928	19.7388	14.3789	17.48	12.6199	15.7832	15.8899	15.2704	15.6795	19.451
109	19.527	16.5976	18.1998	20.495	16.207	12.8108	20.7916	19.8782	19.3286	14.5785	13.8684	10.0406	8.62718	6.4499	6.52277	6.31627	7.72343	10.3562	11.9817	13.3649	16.9711	17.9007	16.2631	15.6187	11.3981	12.1871	10.6113	11.6104	11.3217	13.7953	14.708	15.9667	15.2791	17.6672	16.6266	20.4783	21.2676	18.1963	17.195	12.203	16.2451	11.1128	15.2062	10.1094	15.0277	15.4957	15.4173	16.3128	19.6351
110	17.4936	14.531	16.0789	18.1212	13.1219	10.5243	18.5969	18.027	17.2806	12.1859	11.5481	8.79566	7.02777	6.95473	6.79115	7.95319	8.90835	12.3038	14.1108	16.1874	19.6183	20.1549	18.3839	17.2189	13.9268	13.3608	11.5568	11.7987	11.2939	12.8364	13.6098	14.6196	14.3009	16.8899	15.6114	19.3709	20.6213	18.4164	16.8492	12.4881	15.9889	11.5922	15.4434	11.0877	15.7759	16.9906	15.866	17.4769	20.9019
111	13.4545	10.5018	11.4018	13.562	9.42177	5.62438	13.7358	13.5217	13.4478	8.24964	8.79238	5.96434	6.59573	6.50796	7.70916	9.67701	11.6004	14.9056	16.7367	17.8932	21.8287	22.7804	20.6684	20.1136	14.9614	15.1932	12.2322	12.3094	10.943	11.5363	11.5659	11.3083	10.1166	12.3036	10.2806	14.2008	15.4005	12.9969	12.2599	8.70795	12.8259	8.69835	13.9699	9.79081	15.4863	17.4206	17.0532	19.2629	21.9299
112	12.1465	9.46356	11.3837	12.7418	7.34642	6.13086	13.6396	13.6898	12.7837	7.52873	7.48995	7.16539	6.76821	7.97821	8.78753	12.12	13.7495	17.5024	19.8456	21.5061	25.4864	25.9673	23.6602	22.0083	18.1991	16.8792	13.8525	13.251	11.4049	11.7387	11.7441	11.6583	11.5827	13.9441	12.4503	15.9533	17.8213	16.4603	14.8355	11.6176	14.6481	11.1053	15.5178	12.1109	17.0356	19.4529	17.8592	20.8657	23.6908
113	7.97841	5.20655	6.99128	6.95024	2.97405	2.67766	6.8982	7.37225	7.00629	2.52919	4.53747	6.92519	7.31133	10.1515	11.3379	14.9764	17.09	20.9214	23.4359	25.1932	29.1871	29.6499	27.1539	25.881	21.575	19.2375	16.1369	14.2955	12.2346	12.1324	9.82977	8.85464	7.90822	8.78491	7.68801	10.0228	12.3175	12.5533	11.2224	10.9244	12.9	11.3071	15.6347	14.2159	18.4497	21.5581	19.1091	23.0568	25.6167
114	14.2927	12.1064	14.181	13.4888	8.22716	8.78522	13.8825	13.4767	11.6915	7.29669	6.63819	7.32685	5.29749	8.87249	8.10147	12.1283	13.9346	17.7762	20.8045	23.0523	26.9709	26.9167	24.0614	22.13	18.5327	15.5981	13.4336	11.4847	10.8718	10.879	11.2853	11.53	11.7304	14.5498	14.1379	16.7618	18.6967	18.4268	15.9026	13.8803	15.1356	12.0302	15.6052	13.8996	16.7299	19.0085	15.7845	19.3021	22.4512
115	12.7113	11.163	13.2384	11.4891	6.83147	9.3914	12.1477	12.1134	10.3459	6.63123	6.48945	9.14628	8.82241	12.6687	12.8358	17.1905	19.3672	23.191	26.2724	28.3152	32.4022	32.3788	29.4201	27.4868	23.7737	20.55	18.0594	15.2516	14.0389	13.1963	12.0964	12.1324	12.0692	14.1607	14.1587	16.1471	18.365	18.9168	16.5065	15.7269	16.4239	14.0713	17.7297	17.2255	19.855	23.3107	19.7797	24.0751	26.7677
116	12.5583	10.8801	11.8933	10.2513	6.41965	7.95143	10.0155	8.78459	6.43533	3.01095	2.65095	6.39251	7.69432	11.3952	13.0742	17.3556	20.1636	23.8421	26.922	28.3167	32.8136	33.1002	29.8175	28.1343	23.9331	20.9887	17.7125	14.7212	12.1812	11.0099	8.61257	8.22527	8.13201	10.4756	10.8756	12.9573	14.9379	15.6888	12.8509	12.3163	12.761	11.0791	14.7447	15.0741	18.4961	22.2554	19.5312	24.4348	26.3244
117	14.1198	11.7121	13.2924	12.2981	8.1549	7.65855	11.8391	9.95426	7.54608	3.83497	2.69321	3.08414	2.5778	6.27757	7.73446	12.2502	15.2347	18.8145	21.9674	23.3021	27.8568	27.9903	24.6387	22.7572	18.8259	15.5071	12.2788	9.06537	6.93954	6.39907	5.76442	6.63661	7.65036	10.9273	11.4704	13.8356	15.516	15.9054	12.4916	10.493	10.0249	7.54938	10.7178	10.6521	13.2289	16.7961	13.8836	18.84	20.6829
118	11.0765	8.04931	9.32399	10.2091	6.11083	3.07117	9.89622	8.69044	7.78998	2.58156	2.07119	2.36457	2.16119	5.46329	7.65357	11.3566	14.2422	17.7766	20.3129	21.3536	25.7728	26.4788	23.6109	22.2656	17.4432	15.6295	11.9082	10.1433	7.19413	7.04737	6.83267	6.41869	6.10888	8.64074	7.50958	10.8713	12.4288	11.3259	9.52856	6.45802	9.60717	6.37965	10.6845	8.99872	13.3537	16.8677	15.0233	19.2888	21.1904
119	14.8514	12.0821	13.507	13.9749	9.21426	7.29396	13.9106	12.8625	11.5461	6.53182	5.51408	4.30986	2.32903	4.31008	4.51324	8.13684	10.2991	14.1391	17.0431	18.9267	23.0656	23.257	20.3795	18.9266	14.9602	12.119	9.27114	7.83364	6.9189	7.54762	8.0727	9.35116	9.6508	12.4462	12.2281	15.3308	16.8037	15.7714	13.1239	9.84784	11.4034	7.52886	11.3787	8.73108	12.4938	14.8703	12.3598	15.9421	18.7194
120	18.1169	14.8866	15.49	17.2638	12.8812	9.14594	16.572	14.9842	13.8774	9.16221	7.67873	4.5727	2.04719	2.36812	2.0742	5.26913	7.60875	11.2111	13.8015	14.345	18.7321	19.7368	17.2357	16.1344	11.0576	10.2108	6.97709	6.92567	6.41329	7.82469	8.64349	10.2849	10.1844	12.7722	12.5493	16.0892	16.9064	14.1298	12.4715	7.36431	11.0202	5.76782	10.3003	5.30534	10.833	12.579	11.5956	14.1575	16.8365
121	18.8254	16.2467	17.9067	18.7844	13.065	11.8461	19.3417	18.4136	17.3036	12.4318	11.2191	8.06016	5.35083	4.57516	2.63368	4.75921	6.02264	9.71531	12.0428	14.1238	17.9216	18.2497	15.9271	14.9066	11.2441	9.44152	7.21491	7.62732	7.81312	10.8354	12.0479	13.9181	14.2474	16.9465	16.3134	19.9384	21.0235	18.7506	16.7594	11.991	14.7146	10.1905	12.6265	8.87961	11.9171	12.9341	11.361	13.4551	16.7547
122	22.4396	19.4212	19.8683	21.9411	17.7807	13.6817	21.0824	19.2176	17.9232	14.0352	12.7394	8.03943	6.82853	2.63363	2.0211	2.42028	2.22558	5.6805	7.95898	9.54598	13.2855	14.014	11.9191	10.842	7.4798	6.96896	5.72512	6.8468	6.87859	10.0376	11.6969	13.3611	13.7658	16.1624	16.504	19.9689	20.1019	16.7755	15.4247	9.98884	12.9971	7.56559	10.7673	5.7586	9.88629	10.5835	10.4434	11.1573	14.8565
123	25.518	22.466	23.6296	25.9277	21.1751	18.0104	25.9388	24.7298	23.8064	19.1152	17.852	13.8411	11.4215	8.39759	5.49122	3.79776	2.47738	4.45764	6.088	8.51848	11.4501	11.9538	10.52	8.79804	7.26438	7.42096	7.85468	10.7297	11.719	15.3231	17.3231	19.5762	19.8383	22.3057	21.8032	25.5631	26.059	22.7477	21.6992	16.3667	19.3427	14.017	16.0869	11.6989	12.8028	12.4086	11.559	11.1983	15.3097
124	28.7018	25.6054	25.9706	28.6076	24.5712	20.4474	27.824	26.0616	24.6593	21.2397	19.9015	15.1128	13.6048	9.08271	7.61987	2.8499	2.13974	2.34467	2.23509	2.64903	6.49013	7.63836	6.54696	6.94259	2.64088	7.20979	6.92759	11.0511	12.3804	15.4629	18.0487	19.6145	20.2543	22.2323	22.553	26.0094	24.8177	21.2447	20.8327	15.2122	18.2262	13.2206	14.7448	10.6555	11.7258	10.7888	11.6963	10.1295	13.7514
125	30.8313	27.9629	28.7687	31.3745	27.3343	23.5687	31.2696	29.9072	28.8503	24.8386	23.6016	19.0081	17.2829	13.0664	11.2527	6.90015	5.61711	4.42465	2.45982	4.31407	5.5726	6.44735	7.01516	5.75269	6.11576	10.2911	11.1466	14.7448	16.2124	19.7685	22.2889	24.0373	24.4355	26.5724	26.3402	30.0261	29.348	25.7586	25.4295	19.7697	23.0333	17.7825	19.596	15.3683	15.76	13.9566	14.9211	12.3644	16.4088
126	34.2021	31.4703	32.0314	34.6951	30.8411	26.8244	34.2961	32.6774	31.2631	27.7808	26.4471	21.5741	20.0785	15.3552	13.9471	8.21553	7.81558	5.73273	1.89498	2.43777	2.05578	4.29149	6.17852	7.4029	5.63504	11.2288	11.728	16.0796	18.0941	21.533	24.3334	26.0906	26.936	28.8727	29.1049	32.5681	30.9815	27.4012	27.249	21.7008	24.4698	19.7289	20.7586	16.5006	16.4711	13.9658	15.4574	12.7443	16.4727
127	35.9166	33.5202	33.9508	36.7553	33.3562	29.1097	36.479	34.9874	33.7252	30.4787	29.3024	24.3465	23.192	18.4538	17.4804	11.7405	11.4175	9.50019	5.4659	4.39235	2.84369	5.41049	7.48708	8.52357	8.62807	14.9545	15.0056	19.5762	21.4529	24.5868	27.215	28.6135	29.1931	30.9847	31.0082	34.4284	32.7657	29.1677	29.3143	23.7677	26.9803	22.1987	23.5891	19.3679	19.7571	16.9486	18.8723	16.1071	19.1885
128	39.0292	37.0015	37.3547	40.2653	37.1482	32.8823	40.1365	38.644	37.2422	34.2065	32.9874	27.9574	26.8491	21.988	21.0373	15.0185	14.9812	12.3152	8.08183	6.26941	3.16331	7.08518	8.6997	11.6711	11.1501	17.5782	17.9025	22.6615	24.749	27.7876	30.5792	32.004	32.7675	34.4827	34.4681	37.7584	35.7544	32.1959	32.6778	27.1906	30.2006	25.6231	26.5526	22.2896	22.5575	19.1319	21.4438	18.328	20.8088
129	34.6334	32.4108	32.2735	35.1469	32.2976	27.3118	34.3933	32.664	31.2111	28.5934	27.6275	22.3209	22.0565	16.8957	16.9791	10.8398	11.7644	9.62734	6.3112	2.74154	2.21232	6.78478	6.00038	10.9429	7.84284	14.4123	13.4847	18.3883	19.8931	22.5152	24.9338	26.0251	26.6807	28.1849	28.5837	31.6863	29.3921	25.863	26.1905	20.7401	23.9144	19.6807	21.0728	17.0291	18.3415	15.675	17.8272	15.4893	17.5103
130	41.74	39.6221	39.3582	42.2473	39.4694	34.3286	41.2716	39.315	37.4862	35.1356	34.1756	28.9068	28.6098	23.3636	23.5302	17.0404	18.3476	15.5347	12.1188	7.616	4.22468	10.7655	8.67475	14.8928	12.8473	19.3725	18.5273	23.6125	25.7063	28.1161	30.8153	32.0591	33.2038	34.5545	35.1423	38.2045	35.3351	31.9444	32.2095	26.8239	29.4918	25.9357	26.2026	22.1735	22.6443	18.8157	22.1044	19.4397	19.4029
131	45.446	43.0125	42.75	45.5182	42.4871	37.2108	44.1045	41.7466	39.3647	37.1646	36.0476	31.006	30.3386	25.2948	25.0263	18.4901	19.411	15.8156	11.7509	8.71336	4.44717	9.05308	5.93698	12.8397	13.3889	18.8739	19.3212	24.0275	26.755	29.0592	32.1892	33.6701	35.454	36.9357	38.0276	41.0493	38.014	34.7266	34.6715	29.0629	31.1025	27.8564	26.905	22.967	22.7628	18.3445	21.6945	18.3638	18.3455
132	45.9648	43.791	43.2391	46.1063	43.4175	38.0545	44.6034	42.306	40.0603	38.2067	37.4676	32.2395	32.2951	27.0156	27.5102	20.9813	22.4521	19.3147	16.084	11.332	7.75775	13.9881	10.3959	17.5403	16.3225	22.1745	21.6048	26.4644	28.6605	30.7226	33.2752	34.5434	35.9132	37.1797	38.0229	40.9763	37.3381	34.2566	34.3519	29.3103	31.3806	28.6508	28.2448	24.495	25.1004	21.1504	24.5894	21.8035	21.2934
133	42.8783	40.7409	40.1557	43.0044	40.2792	34.9379	41.3905	39.0584	36.7655	35.0101	34.3124	29.1313	29.2966	24.038	25.0206	18.7845	20.8907	18.0014	15.3275	10.2162	7.86899	13.8936	10.4465	17.0503	14.7647	20.2736	18.6139	23.5373	25.4741	27.4477	29.9408	31.2212	32.647	33.8927	34.7591	37.6976	34.0946	30.968	31.0319	26.03	28.0138	25.2372	24.8289	21.1663	21.9756	18.4927	22.0912	20.0096	19.0648
134	40.0098	37.8311	37.1368	40.0096	37.0044	31.7829	38.042	35.4872	33.015	31.4171	30.8512	25.6948	26.1639	20.917	22.4533	16.5634	19.1912	16.3853	14.9477	9.44243	10.2637	15.0561	11.488	16.5729	13.2341	18.3599	15.8098	20.6992	22.1692	24.0302	26.2829	27.5094	28.9696	30.2567	31.2818	34.1343	30.2137	27.2236	27.2827	22.3768	24.1607	21.4781	21.1789	17.7113	19.0679	15.8313	19.6728	18.2485	17.043
135	36.3224	34.0118	33.5157	36.3662	33.6454	28.321	35.0004	32.7064	30.4652	28.3528	27.4842	22.2766	22.257	16.9621	17.9545	11.7796	14.0088	11.2214	9.54801	4.21173	6.99663	10.3874	7.31561	12.0041	8.32343	14.2892	11.9475	17.104	18.7802	21.0054	23.6049	24.905	26.4006	27.6865	28.5136	31.5004	28.2354	24.9686	25.0607	19.843	22.2337	19.0197	18.8713	15.0102	16.0906	12.9453	16.2421	14.6511	14.332
136	40.4062	37.5226	37.3847	40.0493	36.7696	31.5724	38.5091	36.0641	33.6168	31.3055	30.0949	25.1152	24.3392	19.3344	19.2089	12.7149	14.0375	10.9277	8.16777	3.23218	2.61662	7.14563	3.66017	9.62409	7.85625	13.8091	13.3161	18.1181	20.7515	23.1317	26.3507	27.8924	29.8309	31.4149	32.6918	35.6786	32.5189	29.2775	29.1613	23.6112	25.5946	22.0501	21.1196	17.0718	17.0131	13.0633	16.31	13.6934	13.9359
137	42.7282	40.0163	39.5949	42.3314	39.1943	33.968	40.4409	37.621	34.7468	33.2002	32.4458	27.5366	27.5384	22.4056	23.1481	16.9559	19.0349	16.1411	14.1278	8.89072	9.061	13.323	8.90434	14.7621	12.7706	17.7297	16.4737	21.0638	23.2529	24.9376	27.62	29.058	31.0292	32.4674	33.9809	36.8262	33.1582	30.1923	29.8214	24.5982	25.8728	22.7179	22.0422	18.5827	19.0446	15.5325	19.382	17.2779	15.6782
138	39.2965	35.8574	35.732	37.843	34.2509	29.399	35.8114	32.8051	29.6748	27.8661	26.7766	22.1204	21.319	16.9673	17.6073	12.0616	14.5854	12.0527	11.9896	8.09255	9.53887	11.9998	7.86461	10.8019	8.83023	11.7548	10.319	14.506	17.0826	18.8985	22.1337	23.8098	26.3332	27.9884	29.9093	32.7013	29.323	26.3965	25.7067	20.233	21.1204	17.6098	16.3832	12.7467	12.472	8.8721	12.7039	11.1716	9.4316
139	40.9843	38.2231	37.4784	40.1566	37.0762	32.0486	37.7386	34.9659	32.2705	31.2022	30.9613	25.9752	26.5716	21.4529	23.1564	17.5565	20.2248	17.4723	16.4961	11.1837	13.0696	16.7448	12.7109	17.4151	14.2859	18.7513	16.1803	20.8225	22.2895	23.9418	25.8285	26.9339	28.351	29.5141	30.8001	33.4912	29.1654	26.5104	26.2687	21.8396	23.0696	20.6653	20.5183	17.5605	18.8393	15.6966	19.725	18.4705	16.6244
140	34.7884	32.1475	31.3995	34.141	31.2925	26.1224	32.0224	29.5282	27.2897	25.9178	25.7351	20.515	21.8648	16.5997	19.0122	13.3213	17.0815	14.6294	14.7178	9.85858	12.796	16.1529	12.8128	16.6918	11.3828	16.3161	12.7521	17.5895	18.0171	19.7693	21.1653	22.0861	23.0446	24.1634	25.1421	27.979	24.144	21.1227	21.0708	16.3999	18.4166	16.2883	16.6876	13.4283	16.2775	13.7408	17.5274	17.0972	15.8116
141	36.1275	33.1684	32.3367	34.8069	31.7021	26.9151	32.0082	29.1773	26.4324	25.7339	25.8344	21.0429	22.7914	18.0767	21.375	16.3976	20.8909	18.7618	19.6581	15.1483	18.1942	21.4226	17.7212	20.2912	15.4983	18.4178	14.8916	18.5625	18.3707	19.4896	20.4641	21.3481	22.5699	23.635	25.0738	27.5829	23.2418	20.6824	20.2036	16.2265	17.1457	15.245	15.5144	13.1194	16.194	14.9887	19.0553	19.6122	17.1478
142	32.6211	29.1869	28.7874	30.0763	26.4573	22.4793	26.6975	23.4679	19.6706	19.2952	18.8761	15.4976	16.4406	13.4325	16.0731	12.7118	17.0125	15.7775	17.7917	14.252	18.2551	20.2564	16.2427	16.737	12.0891	13.1101	9.89496	11.663	11.4813	11.9888	13.06	14.3196	16.9179	18.4192	21.1604	23.3869	19.8127	17.6357	15.1079	11.7225	10.2219	7.66187	7.33634	6.68852	9.04758	9.45185	13.255	14.2199	11.9275
143	32.6039	29.872	28.9064	31.4273	28.524	23.7793	28.1972	25.5242	22.739	22.6112	22.98	18.4385	20.9223	16.3864	20.3077	15.6806	20.8265	19.043	20.5065	16.1544	20.244	22.8381	19.4112	21.237	15.7523	18.6312	14.6479	17.7771	16.9184	17.3322	17.585	18.1185	19.039	19.9046	21.318	23.5301	19.0599	16.6941	15.9193	13.1294	13.4196	12.4933	13.3037	11.5158	15.7531	15.2527	19.161	20.0173	17.6745
144	26.1969	24.1386	23.013	25.798	23.684	18.6213	23.8161	21.7603	20.2286	19.5294	20.1425	14.6857	17.5542	12.5935	16.4547	11.6562	16.5154	15.4028	16.6033	13.0914	17.8604	19.926	17.61	19.1101	12.6714	16.539	12.1085	15.8679	14.5984	15.8511	15.8329	15.5242	15.6717	16.1972	16.5713	19.1001	14.9237	12.0968	12.3477	9.56299	11.5011	11.1304	12.4412	9.40706	14.7825	14.5491	17.6646	18.5023	18.0102
145	27.1806	25.6638	24.0024	26.9553	25.144	20.4482	24.4024	22.7317	21.5784	21.1546	22.1972	16.7669	21.0263	16.7308	21.1217	17.1478	22.2899	20.8873	22.066	18.0311	22.0431	24.8059	22.4009	24.2509	17.9574	21.5672	16.9424	20.1601	18.4345	18.9471	18.3012	17.1166	17.0029	17.2151	17.1578	19.1906	14.9552	12.424	12.9998	11.385	13.7848	13.4568	16.4473	12.7689	19.0273	19.1469	22.4636	23.5358	22.354
146	25.7669	24.8123	22.7441	25.8908	24.5559	20.065	23.3196	22.1141	21.4351	21.225	22.5495	17.1201	21.9778	17.8348	22.3657	19.3904	24.4583	23.8399	25.1759	21.4385	25.6869	28.2164	26.1081	27.7468	21.1511	24.4752	19.3936	22.0699	19.8497	20.0411	19.0876	17.3024	16.8694	16.6179	16.1913	17.3974	13.4295	11.4319	12.3524	11.9511	14.4064	14.359	18.0013	14.2947	21.4801	22.5984	25.4652	26.9392	25.9957
147	22.6312	22.7706	20.3635	23.8293	23.3861	18.9684	22.2193	21.8588	21.6444	20.8537	21.6923	16.1529	19.9466	15.7955	19.755	16.022	20.9165	19.8128	20.8175	17.1447	21.3781	23.8685	21.9987	23.7704	17.246	21.2204	16.6053	20.0768	18.0487	19.1933	18.5505	17.3346	17.0061	16.5242	15.4181	17.0274	13.7811	11.3513	12.64	11.3228	14.6438	13.1255	17.06	12.7704	19.3227	19.4868	22.4617	23.3611	22.9727
148	21.705	22.5121	19.9676	23.5759	23.4976	19.3234	22.564	22.6206	22.8763	21.9206	23.9397	18.719	22.8544	19.5739	23.0555	19.7716	24.1349	23.9561	24.4343	21.9427	25.3482	27.9473	27.4087	28.594	22.1977	26.3623	22.0334	25.0195	22.6759	23.559	22.3826	19.9089	18.7575	17.4987	16.084	17.6465	14.9875	12.7326	14.6714	14.2694	18.4373	17.1868	22.0452	17.7323	24.9981	25.8871	28.2923	29.0817	29.6072
149	18.1528	18.0765	16.6782	19.8931	19.0212	14.8411	19.9565	19.8294	19.999	18.1721	19.5986	14.5124	18.1561	15.086	18.5246	16.0493	20.5444	20.8993	21.7641	19.5725	23.5294	25.7295	24.7797	25.7332	19.3212	22.7396	18.2367	20.7831	18.4045	19.6704	18.5867	16.5864	15.3689	15.4697	13.7008	16.376	14.1744	11.0475	12.782	10.3124	15.4047	13.1027	18.6162	13.7784	21.3244	22.8846	24.5831	25.7412	26.8851
150	18.7635	19.9093	18.2656	22.0707	21.9785	18.5965	23.1603	23.6922	24.2853	22.4271	24.106	19.4248	22.44	19.8554	22.4781	19.5497	23.4319	23.7619	24.2162	22.2237	25.6044	27.9248	27.6178	28.6164	22.506	26.3981	22.7214	25.5588	23.3802	25.0136	23.901	21.6649	20.0293	19.4992	17.1123	19.6707	18.0177	15.4101	17.3595	15.5623	20.7173	18.4506	24.0103	18.911	26.2041	27.1641	28.8759	29.4889	31.0726
151	13.5573	14.5102	12.9923	16.6867	16.5518	13.4865	18.025	18.8618	19.7522	17.5388	19.5659	15.5704	18.9967	16.8873	19.9127	18.6428	22.5103	23.5025	24.3852	23.2701	26.7928	28.8294	28.2205	28.7917	22.8617	25.5232	21.6524	23.3774	20.9792	21.9444	20.672	18.0491	15.8316	15.4504	12.2605	15.3572	14.7792	11.8097	13.9294	12.4943	17.793	15.763	21.7533	16.9314	24.6188	26.635	27.655	29.0504	30.9591
152	16.1893	17.3737	16.8133	20.3761	20.1504	17.8801	23.1726	24.5135	25.6319	22.6759	24.7242	21.2244	23.3957	21.5288	23.669	21.6606	24.9491	25.5725	26.2687	25.2293	28.2905	30.363	30.3368	30.9193	25.5496	28.5631	25.819	27.5628	25.8599	27.2533	26.4582	24.1522	21.8214	21.6258	17.9736	21.1499	20.9258	18.0595	20.2941	18.5069	23.9843	21.3194	27.3369	22.0634	29.2955	30.5848	31.6722	32.2134	34.7924
153	14.1295	16.3053	15.864	19.3738	19.3445	17.4442	22.696	24.8201	26.3803	22.8067	25.2288	22.7169	24.3058	23.0541	24.8569	23.7931	26.4615	27.5391	28.3797	27.9955	30.6225	32.5457	32.7686	32.6757	28.2155	30.479	28.1539	29.2155	27.7863	28.708	27.9369	25.8479	23.1315	22.8828	18.7677	22.0619	22.8329	19.921	22.3139	20.6337	26.1089	23.3534	29.5503	24.5196	31.5442	32.9701	33.6714	34.3935	37.4665
154	15.8524	16.821	17.0524	20.2293	19.7168	18.0454	23.7955	25.8244	27.3626	23.3647	25.4489	22.8179	23.4929	22.104	22.8872	21.6532	23.2056	23.9711	24.5229	24.5378	26.7184	28.4076	29.0876	28.2025	25.344	27.8434	26.4295	27.9434	27.1689	28.4154	28.3858	26.696	24.0262	24.1148	20.0455	23.4417	24.358	21.3675	23.6527	21.5277	27.0217	23.5923	29.6055	24.3323	30.6881	31.2583	31.6605	31.7314	35.3146
155	14.8605	17.7603	17.5291	20.9925	20.8251	19.854	24.8581	27.7656	29.9208	25.5969	28.0356	26.0753	26.9214	25.8624	26.8636	26.0314	27.9834	28.9111	29.6073	29.6239	31.9871	33.6934	34.1842	33.3268	30.1878	32.3706	30.631	31.732	30.8666	31.8772	31.419	29.7172	27.0088	26.5794	22.3126	24.9931	26.2777	23.6221	26.1505	24.7612	30.2349	27.0317	33.1404	28.0107	34.5097	35.5147	35.8763	36.3573	39.7796
156	19.3262	20.1058	21.3047	23.9967	22.615	21.8561	28.1097	30.3046	31.9343	27.0758	29.0255	26.7827	26.9353	25.9242	26.1064	25.7443	26.6403	27.4664	27.9134	28.268	29.6523	31.2443	32.5631	30.7059	29.459	31.5218	30.4109	31.4276	30.9666	32.2978	32.4222	31.2817	28.7972	29.2612	25.1891	28.6157	29.7395	26.7294	28.9511	26.4753	31.9399	28.1815	34.0487	28.9421	34.681	35.282	35.0564	35.5084	39.2469
157	16.5897	16.2443	17.921	20.477	18.4213	17.7385	24.4185	26.3649	27.7573	22.7677	24.6534	22.3747	22.203	20.5603	20.2154	19.4844	19.8725	20.7249	21.2351	21.8072	23.5455	25.0011	25.9364	24.0821	22.8214	24.8816	24.261	25.7771	25.6396	27.5091	27.8753	27.2518	24.834	25.8516	22.038	25.5771	27.1191	24.1964	25.9982	22.2772	27.7007	23.4223	29.026	23.6339	28.8894	28.997	28.7444	28.7744	32.6517
158	12.8184	13.2058	14.6774	17.2855	15.7458	15.0127	21.416	23.4803	25.2724	20.5062	22.7875	21.0848	21.6909	21.4224	22.3094	22.6561	24.0962	25.9952	27.111	27.9812	30.614	32.0115	31.7955	30.5289	27.6151	28.5904	26.7239	27.1317	26.183	26.8703	26.4684	25.1792	22.6004	23.1877	19.212	22.6712	24.3147	21.6086	23.4855	21.0307	26.1975	22.8924	28.8658	24.2945	30.3699	31.7816	31.4868	32.769	36.0792
159	13.2521	13.2135	14.4896	17.1446	15.7388	14.442	20.8388	22.7783	24.3944	19.7411	21.9576	19.9103	20.6949	19.8431	20.7762	20.51	22.2855	23.7947	24.7947	25.3432	28.0807	29.5601	29.4346	28.5169	25.2955	26.6927	24.9267	25.6386	24.8946	25.7212	25.3329	23.8553	21.2591	21.8313	17.8745	21.3953	22.8836	19.9017	21.8581	19.3152	24.6252	21.3204	27.3834	22.4792	28.6616	29.8409	29.895	30.7958	34.1423
160	12.612	12.6788	12.4484	15.763	15.0038	12.0725	18.087	19.385	20.4493	16.6033	18.5422	15.6837	17.2573	15.8331	17.9192	17.2609	20.2095	21.7938	22.5894	22.4354	25.2579	27.0115	27.0454	26.8882	22.0335	23.969	21.2731	22.1396	20.5479	21.5068	20.93	19.104	16.5923	17.2633	13.5305	17.0363	17.7847	14.6758	16.6032	13.8236	19.3301	16.1789	22.3526	17.3648	24.3856	26.0909	26.6562	27.8812	30.7208
161	17.2969	17.6885	17.6227	20.9981	20.0479	17.5981	23.668	24.7467	25.7216	22.1941	23.9059	20.5392	21.381	19.1916	20.527	18.5555	20.2991	20.5689	20.4809	20.0555	22.0281	23.9636	25.0328	24.5846	21.4433	25.0238	23.2022	25.0348	24.0459	25.8243	25.6357	23.8287	21.6342	21.9422	18.4235	21.7328	21.4719	18.4595	20.4934	17.9324	23.5964	20.3184	26.1864	20.6464	27.2387	27.9488	28.8535	28.564	32.1414
162	16.8023	16.2617	15.9397	19.2154	18.0223	14.485	20.5297	21.1251	21.8994	18.5279	20.0464	16.0925	18.1054	15.758	18.2101	15.7097	19.127	19.6534	20.317	18.9621	21.8938	24.0821	24.3084	24.9516	19.5006	22.6682	19.4575	21.6285	19.8024	21.6214	20.8929	19.1582	17.3727	18.0507	15.17	18.5743	17.7765	14.7067	16.2994	12.941	18.6122	15.4836	21.2365	15.8043	22.9792	24.2469	25.4598	26.1472	28.3791
163	20.8814	21.2137	20.2061	23.7946	23.1409	19.4704	24.8206	25.2214	25.8352	23.2166	24.5478	20.1855	22.1211	19.0598	20.9429	17.4338	20.5985	20.5908	20.5339	18.8503	21.7743	24.1113	24.4001	25.4327	19.7769	24.1305	21.5943	24.4818	23.0955	25.2612	24.8154	23.0511	21.3478	21.6308	18.8892	21.9458	20.342	17.4805	19.372	16.6757	21.9946	19.0814	24.4539	19.0447	25.5645	25.7472	27.2872	27.2594	29.4985
164	21.3376	20.3103	19.5966	22.7161	21.2098	16.7278	22.823	22.0444	21.977	19.5422	19.8656	14.8918	16.8	13.0483	15.9769	12.2743	16.5841	16.6499	17.4224	15.5171	19.4053	21.523	20.6052	21.5022	15.2691	19.0201	15.4201	18.5439	16.7241	18.8665	18.6453	17.7645	16.8795	17.7356	16.7428	19.7235	17.7537	14.3281	15.5643	11.1877	16.4846	12.8057	17.9717	12.4592	19.1521	19.8142	21.472	22.0416	23.72
165	26.097	26.2503	24.7403	28.05	27.1633	22.6469	27.7853	27.201	27.0268	25.4768	26.2888	20.8514	23.4422	19.0308	21.9569	17.0991	20.8868	20.087	19.5406	16.9564	19.2053	22.5184	22.1772	24.165	18.0183	23.3767	19.8398	23.7929	22.0679	24.0205	23.741	22.6267	22.1404	22.3015	21.0856	23.6885	20.2989	17.4213	18.7449	16.4032	20.2151	17.9834	22.0969	17.3704	23.4877	22.9632	25.635	25.6467	26.4412
166	26.2554	24.9433	23.8478	26.828	25.1111	19.857	25.6148	24.1079	23.3558	21.7263	22.0451	16.6412	19.0728	14.4647	18.0519	13.4904	17.9971	17.0334	17.1451	13.7545	17.0062	19.997	18.8437	21.0192	14.5846	19.4474	15.2544	19.0454	17.2937	19.2314	19.165	18.637	18.4893	19.0706	18.545	21.3562	17.935	14.7725	15.7929	12.4026	16.1162	13.4139	17.3562	12.5802	18.7354	18.6039	21.1673	21.6924	22.2323
167	29.0617	28.7315	26.6268	29.9841	28.8784	23.7384	27.8484	26.9322	26.2908	25.2103	25.7899	20.319	23.284	18.5277	22.308	17.3208	21.7971	20.4026	20.4506	16.4707	19.3988	22.8279	20.7597	23.7673	17.5275	22.2102	17.9898	21.8683	20.5969	22.1161	22.0746	21.6026	21.5153	21.4185	20.8142	22.219	18.3338	16.2191	17.2934	15.4227	18.1543	16.8171	18.9559	15.2305	20.6925	19.8857	23.3434	23.7914	22.9123
168	29.9674	27.7103	26.8172	29.6588	27.3071	22.029	27.8914	25.8128	24.246	22.7446	22.8231	17.471	19.4815	14.3596	17.8774	12.6754	17.2422	15.7191	16.1087	12.3106	15.416	18.7449	16.9719	19.3923	12.9668	17.6079	13.4139	17.7007	16.5045	18.3798	18.9906	19.288	19.637	20.5285	20.9321	23.8281	20.2497	17.0451	17.3883	13.0633	15.9907	13.6584	15.8487	11.6593	16.7628	15.853	18.9901	19.356	19.0987
169	34.9433	33.0507	31.883	34.6552	32.3238	27.3602	32.2427	30.0053	28.0428	27.345	27.7682	22.6329	25.0478	20.146	23.7686	18.5186	23.0434	20.7201	20.788	15.7206	18.6668	22.1121	18.7625	22.5044	17.4731	21.6185	18.0296	22.121	21.328	22.6777	23.0057	23.2232	23.7121	24.3984	24.9841	27.0613	22.6326	20.3558	20.5003	17.3455	19.1176	18.186	19.0309	16.0511	20.1934	18.4441	22.5048	22.5217	20.462
170	38.4789	36.4362	35.5224	38.3709	35.8356	30.6899	36.2996	33.8572	31.6466	30.557	30.5373	25.3615	26.8422	21.6217	24.1512	18.2192	21.7993	19.2729	18.4096	13.1866	15.1675	19.3915	16.1346	20.8746	16.0756	21.4373	18.0023	22.691	22.8907	24.5001	25.7557	26.6022	27.3991	28.3526	29.1353	31.4172	27.0263	24.5125	24.5751	20.8104	22.5883	20.8067	21.0699	18.1031	20.8789	18.5076	22.5096	22.0066	20.3651
171	42.058	39.6804	38.7453	41.4378	38.5983	33.6408	38.9146	36.1976	33.3173	32.6225	32.5592	27.7684	29.0277	24.1668	26.6956	21.4172	24.6244	22.0297	21.5305	16.473	18.1952	21.6903	17.0928	21.3422	18.8615	21.7824	19.4383	23.3835	24.4225	25.5851	27.0781	28.1266	29.5749	30.6317	31.7369	34.0095	29.4999	27.1246	26.7767	23.2338	23.9169	21.7469	21.6251	19.3932	20.3796	18.0294	22.2069	21.4848	18.411
172	44.0597	42.0499	41.0138	43.7435	41.1076	36.1445	41.208	38.6696	36.183	35.5389	35.6682	30.7099	32.281	27.2475	29.9306	24.3965	27.7923	25.1399	24.2964	18.8436	19.7758	24.5689	20.6457	25.6127	21.8796	26.1785	23.1457	27.5432	27.9574	29.2437	30.4018	31.2494	32.1801	33.0472	33.9984	36.1948	31.7245	29.3357	29.2425	25.79	26.9186	25.1678	25.3204	22.8996	25.0166	22.7728	26.9805	26.2928	23.861
173	41.4243	40.3628	38.7349	41.7967	39.8338	35.0244	39.2632	37.1491	35.0164	34.7344	35.2754	30.2411	32.3272	27.3607	30.4327	24.9663	28.7518	26.2054	25.6391	20.2384	21.6427	26.2738	22.5762	27.2764	22.9358	27.2275	23.9099	28.2327	28.1342	29.3441	30.0757	30.3694	30.9224	31.4787	32.0666	33.7874	29.2618	27.1813	27.2763	24.8052	25.9734	24.9198	25.3193	22.9422	25.7223	23.8444	28.0331	27.6841	25.268
174	39.6301	38.2512	36.9178	39.8583	37.821	32.7792	37.6311	35.5963	33.7365	33.0311	33.4114	28.2578	30.3949	25.3044	28.4751	22.8125	26.7437	24.3864	23.3878	18.0853	18.6438	23.8868	20.6651	25.8159	21.1932	26.1941	22.5346	27.0885	26.6453	28.0986	28.6664	28.9323	29.3791	29.997	30.3579	32.4805	28.1233	25.6815	25.9754	23.0213	24.8079	23.8024	24.4311	21.5852	25.1764	23.242	27.2381	26.9645	25.2149
175	35.0681	34.2362	32.749	35.8181	34.1896	29.1007	33.921	32.2356	30.887	30.0423	30.5611	25.1977	27.821	22.8009	26.2887	20.7424	24.8327	22.6869	21.6185	16.8842	18.4106	22.9596	20.5068	25.0515	19.6564	25.2918	21.2521	25.6732	24.6438	26.2267	26.3746	26.1378	26.2908	26.7486	26.6605	28.8511	24.6855	22.1179	22.7229	20.0488	22.4261	21.32	22.9524	19.4054	24.3323	22.7139	26.4942	26.2797	24.9852
176	34.3591	33.0357	31.9395	34.9043	33.1232	27.8109	33.4758	31.6732	30.3412	28.9802	29.1439	23.7766	25.5268	20.1441	22.4168	16.206	19.6184	17.271	16.0572	11.199	12.6453	17.3483	14.9434	19.3895	14.2326	20.4438	16.9302	21.9904	22.2614	24.3018	25.3005	25.4446	25.6634	26.3457	26.3191	29.0682	25.1441	22.1802	22.7909	19.1983	22.0016	19.9996	21.6428	17.9495	21.0022	18.3784	21.9308	21.0034	20.6357
177	32.595	32.2061	30.792	34.0106	32.4689	27.3433	33.0011	31.5211	30.5754	29.0992	29.2395	23.7987	25.3494	20.2209	22.6459	16.5929	19.9349	18.1891	16.6615	12.9609	14.4664	18.5588	17.3713	21.1544	15.5995	21.9356	18.683	23.5908	23.0789	25.2557	25.917	25.7642	25.776	26.3373	25.9149	28.349	24.6729	21.8784	22.8039	19.486	22.6488	20.3859	22.9471	18.7226	23.2622	21.0866	24.1466	23.2517	23.8338
178	29.173	28.2724	27.3289	30.4177	28.795	23.7618	29.8869	28.4632	27.5721	25.663	25.619	20.174	21.5509	16.5222	18.6751	12.9299	16.5151	15.2018	14.3956	11.4939	13.9498	17.1723	16.2962	18.8971	12.8889	18.7898	15.6099	20.2139	19.7112	21.9423	22.6925	22.7453	22.7641	23.5231	23.226	26.137	23.0897	19.7726	20.5877	16.5182	20.075	17.0132	20.1081	15.5267	20.3233	18.4217	21.2909	20.6907	21.4805
179	28.5748	27.5787	27.1074	30.2254	28.5429	23.9833	30.2676	29.5295	29.4435	26.8032	26.8742	21.7748	22.7208	18.3109	19.6928	14.5982	17.4086	16.6507	15.3802	13.325	15.037	18.3298	18.5425	20.617	15.1783	20.8032	18.4511	22.6453	22.1533	24.6715	25.307	24.9577	24.2988	25.1692	24.1375	27.0565	24.483	21.2585	22.5596	18.4389	23.1506	19.4655	23.6139	18.4377	23.2799	22.0131	24.0587	23.2389	25.1075
180	24.4576	23.222	22.6992	25.7344	23.6289	18.8003	25.4084	24.3982	24.1428	21.3806	21.2762	16.162	17.2963	13.0537	15.214	10.9191	14.6234	14.4501	14.8469	12.3894	16.2063	18.4774	17.8108	19.0325	12.7101	17.4607	14.2399	18.103	16.9033	19.2427	19.8112	19.6476	18.9939	20.1281	19.4234	22.5056	20.5763	17.0736	17.9791	13.2038	17.7337	13.9908	18.1844	12.9193	18.4421	17.9344	20.0361	20.073	21.6053
181	24.0016	22.954	23.2352	26.2876	24.193	20.4096	27.2755	27.2128	27.5324	23.6718	24.0138	19.6457	19.8251	16.3526	17.0796	13.7165	15.7748	15.7837	15.7066	14.273	16.8617	19.195	19.87	20.5499	15.7518	20.0208	18.4467	21.3849	20.9768	23.4112	24.2461	23.8521	22.575	23.809	21.8363	25.1634	24.29	20.9282	22.3735	17.5681	23.161	18.6822	23.4477	17.8078	23.0804	22.7189	23.8681	23.3152	26.2109
182	17.3511	15.9751	15.8925	18.979	17.1505	13.1288	19.6313	19.6501	20.1373	16.6343	17.6924	13.7952	15.277	12.9751	14.83	12.4617	15.4828	16.1409	16.7031	15.9074	18.7695	20.7139	20.8941	21.3565	16.3145	19.2491	17.0561	18.9654	17.343	19.065	18.7288	17.3067	15.4683	16.5733	14.2088	17.6424	17.328	14.1696	15.4764	11.2958	17.0594	13.3718	19.251	13.7503	20.734	21.7336	22.7267	22.9498	25.8683
183	18.4346	17.1339	18.2703	20.9768	18.3326	15.3316	22.9116	23.3773	24.0116	19.2303	20.1076	16.635	16.659	14.5391	15.227	13.9571	16.0712	16.7779	17.4299	17.1862	19.9767	21.7376	21.8428	21.1954	17.6471	20.3068	18.6477	20.1687	19.7105	21.5949	21.972	21.5779	19.6215	21.2093	18.455	22.2421	22.7143	19.5067	20.6204	16.1405	21.6461	17.1904	22.7353	17.2647	22.9433	23.5126	23.9802	24.2293	27.6664
184	14.5105	12.81	13.6399	16.4389	13.8011	10.5192	17.9965	18.5554	19.346	14.6327	15.9739	12.8455	13.7706	12.1931	13.992	13.2912	16.1397	17.9339	19.2136	19.4333	22.9809	24.4886	23.4516	23.4469	18.2033	19.9156	17.3702	18.2473	16.9859	18.2727	18.2798	17.1466	15.0033	16.4646	13.6682	17.4598	18.0061	14.8045	15.9305	11.8884	17.3128	13.3403	19.2992	14.1345	20.6971	22.2079	22.7194	23.8726	26.7801
185	14.6959	12.862	15.0439	17.2692	13.8775	12.6194	20.0971	21.5537	22.168	16.9197	18.3267	16.2106	16.0371	15.4063	15.915	16.0438	17.4426	19.2903	20.4702	21.5203	24.3751	25.622	25.1323	23.6869	20.963	21.9314	20.333	20.9791	20.4033	21.5717	21.7845	21.2521	19.2617	21.015	17.5621	21.4271	22.8144	19.7166	20.8156	17.0934	22.173	17.9747	23.6325	18.6006	24.2747	25.2899	25.0455	26.0903	29.4851
186	11.1068	9.87548	12.047	14.3414	11.6484	11.3958	18.2172	20.1333	21.1319	15.9478	17.7818	16.2993	16.437	16.7269	17.2362	18.6932	19.6115	22.2753	23.6766	25.1312	27.9193	28.9962	28.3366	26.2949	23.9407	24.1466	21.9409	22.1418	21.1163	21.8506	21.7179	20.8912	18.8038	20.2978	16.6333	20.3295	22.0481	19.6937	20.7268	17.7523	22.4472	18.8289	24.4231	20.0894	25.7289	27.3353	26.5285	28.31	31.5606
187	12.8994	10.8928	13.457	15.392	11.1727	10.4242	18.0832	19.0847	18.9872	13.5357	14.3269	12.9549	12.0491	12.3388	12.1532	13.5895	14.4511	17.7453	19.4107	21.595	24.636	25.2237	23.8581	22.0113	19.6181	18.9037	16.8665	17.113	16.6864	17.7658	18.1149	18.0241	17.0016	19.125	16.4994	20.2341	21.994	20.0133	19.5799	16.3059	20.2768	16.2125	20.7964	16.379	21.1999	22.4817	21.0114	22.8507	26.3904
188	11.5832	10.4448	13.1155	14.7125	10.8296	11.7792	18.4187	20.1673	21.1937	15.9756	17.7301	17.1233	16.8493	17.6762	17.934	19.7989	20.7162	23.918	25.4975	27.5863	30.4393	31.1496	30.0312	27.9939	25.7284	25.049	22.825	22.8045	21.6507	22.3064	22.1264	21.4652	19.9063	21.3969	18.02	21.4702	23.5108	21.7749	22.2896	19.71	23.8229	20.3857	25.5136	21.5668	26.7507	28.4815	26.997	29.015	32.4933
189	12.623	12.1984	14.7471	16.3103	12.6477	14.6223	20.5122	22.4796	24.0108	19.0882	21.0404	21.0396	20.7048	21.6869	21.8917	23.6393	24.3978	27.4994	28.9931	31.2386	33.8015	34.4489	33.5862	31.0642	29.6396	28.7452	26.7511	26.6277	25.4874	26.0495	25.6697	24.9829	23.504	24.5265	21.2537	24.3615	26.6044	25.1555	25.9406	23.6678	27.6699	24.4944	29.5011	25.7268	30.7787	32.4472	30.6677	32.6632	36.3214
190	9.79595	9.72415	12.4085	14.069	11.954	13.7094	19.0044	21.3848	23.7865	19.0182	21.3436	21.3499	21.4596	22.4832	22.8701	24.8619	25.7657	28.8951	30.4138	32.3479	35.1683	35.9359	35.0002	32.7813	30.7499	30.067	27.8152	27.691	26.2337	26.66	25.9463	25.0437	23.0274	23.4631	19.7045	22.5675	24.7913	23.181	24.6648	22.9043	27.3273	24.5717	29.8886	26.2847	31.5768	33.4839	31.9322	34.0298	37.5148
191	7.35798	7.57271	9.73829	11.8909	11.1961	12.0718	16.8131	19.5792	22.4256	18.0294	21.2136	20.7385	22.1488	22.835	24.1206	26.3831	27.5757	30.5373	32.0407	33.4048	36.4509	37.579	36.579	35.2189	31.7054	31.8363	29.0684	28.8415	26.8451	26.9631	25.5552	24.2045	21.6388	21.4956	17.6086	20.1228	22.5718	21.2177	22.7923	21.7966	26.1187	23.9307	29.5959	26.2856	32.1829	34.5041	33.4711	35.8788	38.8933
192	6.88294	7.37732	8.89406	11.3707	10.3631	10.4373	16.0642	18.6616	20.9658	16.423	19.2067	18.3722	19.4502	19.6315	20.8186	22.4268	23.7659	26.4147	27.8303	29.0187	32.0988	33.2749	32.3991	31.2357	27.6317	28.0925	25.597	25.6175	24.0429	24.4338	23.363	22.0813	19.4702	19.5098	15.409	18.6214	20.5027	18.431	20.2584	18.883	23.6933	20.9489	26.7978	22.9064	28.9134	30.9045	30.3141	32.3024	35.3057
193	2.63277	6.61128	4.77443	8.37324	10.3905	9.54315	12.1447	15.6138	18.7247	15.0752	19.5071	18.1038	21.0358	21.2234	23.4714	24.2854	26.6063	28.8011	30.0803	30.423	33.7352	35.2787	34.4892	34.23	29.3258	30.6131	27.9799	27.9935	25.4514	25.1356	22.9084	20.4365	17.4871	15.9639	11.6388	13.9108	16.204	14.6817	16.7646	17.3569	21.7479	20.7138	26.6282	23.3613	30.4039	32.8068	32.7734	34.6829	37.4618
194	8.73298	11.4535	11.3197	14.3966	15.281	14.2275	18.3519	21.2974	23.9738	20.0501	22.9071	21.187	22.6839	22.1135	23.768	24.0791	26.16	27.9246	28.9641	29.2227	32.1392	33.7445	33.5121	32.8127	28.9975	30.3929	28.1542	28.4037	26.9563	27.3498	26.3671	24.3695	21.4969	20.8543	16.5254	19.4097	21.2284	18.5824	20.9098	19.9527	25.1464	22.7592	28.9268	24.4629	31.1987	33.0138	33.0999	34.5018	37.5423
195	10.1542	12.3606	11.1915	15.0801	15.6339	13.7458	17.8151	20.3103	22.2455	19.1809	22.3031	19.7161	22.3154	20.98	23.4388	22.9316	25.9892	27.487	28.5384	28.1103	31.4674	33.309	32.74	32.9987	27.5847	29.695	26.658	27.5893	25.6353	26.1989	24.8734	22.4442	19.6516	18.4206	14.1493	16.7808	18.0158	15.4208	18.0115	17.4093	22.743	20.6196	26.8462	22.1974	29.599	31.5713	32.1552	33.5563	36.1581
196	11.9068	16.0609	13.0987	17.651	19.2601	17.5333	20.2657	23.161	25.2197	22.4627	25.946	22.733	26.1388	24.4981	27.253	26.2132	29.6519	30.7531	31.6387	30.6588	33.9639	36.015	35.645	36.1479	30.5325	33.1147	29.6999	31.1258	28.8819	29.5437	27.8767	25.027	22.3829	20.8202	16.9374	19.0913	19.7462	17.2995	19.977	19.9603	25.1128	23.5526	29.6597	25.0259	32.6858	34.6558	35.5516	36.7975	39.0158
197	15.8773	19.3506	16.5782	21.0395	22.2846	19.8541	22.6309	24.9075	26.2493	24.1158	27.1679	23.6205	26.8188	24.9418	27.5743	25.8836	29.4505	30.1362	30.8559	29.5767	32.7097	34.8913	34.7748	35.4336	29.8092	32.8342	29.5304	31.3291	29.1821	30.188	28.6604	25.6431	23.2322	21.4166	17.9683	19.9397	19.9288	17.6352	20.2408	20.4588	25.4094	24.0431	29.997	25.1534	32.7485	34.4171	35.5893	36.4084	38.59
198	11.9406	14.2274	12.0122	16.0555	16.9287	14.3345	17.559	19.2232	20.5445	18.2978	21.4746	17.9332	21.9264	20.1945	23.3641	22.7187	26.3976	27.8469	28.9082	27.2983	30.737	32.9532	32.5063	33.169	27.0792	29.5368	25.5855	26.9688	24.4093	24.7944	23.0397	20.0571	17.519	15.6906	12.3286	14.6359	14.2749	11.8936	14.514	15.063	19.889	18.8305	24.8741	20.5017	28.2825	30.6043	31.3978	33.136	35.0155
199	15.8752	17.8666	14.3906	18.6852	19.5094	15.9017	18.5323	19.7861	20.7081	19.63	22.5183	18.1183	22.8436	20.4348	23.9667	22.1571	26.3479	27.0362	27.8415	25.917	29.5711	31.8531	31.1702	32.0665	25.793	29.0377	24.6384	26.5953	23.974	24.4378	22.8056	19.5081	17.5086	15.3203	12.7729	14.3428	13.419	10.9949	13.6541	14.5475	18.9176	18.1424	23.7575	19.5177	27.3666	29.4545	30.8919	32.2903	33.3795
200	13.4029	14.3567	11.9204	15.5202	15.7108	11.6799	15.2534	15.9446	16.5459	14.8575	17.0304	12.5553	17.0299	14.7422	18.3868	17.0906	21.3031	22.5125	23.6487	22.3325	26.4423	28.3853	27.0319	27.5835	21.0515	23.8304	19.3745	21.0693	18.4072	18.8732	17.3473	14.4886	12.507	11.836	9.15245	11.6974	10.6253	7.91385	10.0932	9.0373	14.0471	12.7053	18.5013	14.1866	22.0738	24.3705	25.5002	27.1416	28.5815
201	17.9776	18.7641	15.6002	19.4308	19.4469	15.2014	17.675	17.538	17.6657	17.4676	20.0024	14.8573	20.3375	17.4973	22.074	20.7189	25.4109	25.8926	27.2472	24.7935	29.353	31.4319	29.7983	30.5816	23.6419	26.5068	21.3365	23.1229	20.337	19.9384	18.2725	15.1573	13.8541	12.0035	10.9682	12.16	9.09642	7.18738	9.16842	10.1224	13.7852	14.0365	18.8777	15.7285	23.3486	25.6156	27.4555	29.5321	29.6572
202	19.5734	18.5947	16.6817	19.8509	18.9196	14.2963	18.2007	17.4221	17.3674	16.3934	18.258	12.9135	17.8924	14.3829	18.5491	16.3684	21.0969	21.4599	22.7616	20.4637	24.9965	27.0321	25.4358	26.2764	19.3537	22.4326	17.2883	19.584	16.9884	17.2383	16.0332	13.8946	12.9778	12.0679	11.1719	13.0757	9.4281	6.92216	8.51098	8.35734	11.9521	11.0611	15.8068	11.9911	19.5815	21.5199	23.6239	25.3617	25.4061
203	22.2496	20.742	18.717	21.6809	20.0922	15.7866	18.7404	17.0804	15.9171	16.0542	17.4921	12.4506	17.7215	14.2083	19.2946	17.863	22.7178	23.0627	24.8889	22.0367	27.1389	28.9785	26.5284	26.945	20.1579	22.3045	16.8982	18.5195	16.0178	15.2495	13.9711	11.8694	11.5526	11.519	11.6118	13.3204	8.90628	6.76011	7.06133	6.91453	9.05388	10.062	13.6038	10.7658	18.188	20.2664	22.7232	24.8607	24.3723
204	24.4634	22.0762	20.8151	23.4606	20.9526	16.3338	20.1596	17.8432	15.9938	16.0917	17.1969	12.0516	16.476	12.3189	17.1546	14.7432	19.8324	19.6896	21.5846	18.6031	23.8712	25.5462	22.7875	23.1706	16.5396	18.7799	13.4633	15.5288	13.4983	13.4574	12.8785	11.6355	11.8086	12.1671	13.1885	15.1694	10.7649	8.43367	8.03505	6.55145	7.99521	8.52105	11.0296	7.77983	14.8081	16.4813	19.3256	21.0966	20.3399
205	27.0335	23.8856	22.7799	24.7382	21.8679	17.8639	20.911	18.4546	16.0296	16.3401	16.7693	12.5933	16.3435	12.9796	17.6722	15.9725	20.7433	20.8127	22.9885	20.0601	25.2758	26.8329	23.4363	23.417	17.3423	18.3403	13.3781	14.4562	12.9249	11.8677	11.569	11.6775	12.2414	12.8041	14.4071	16.2609	11.8447	9.8349	8.5857	6.87962	6.84037	6.95205	8.73088	7.68046	13.2971	14.9758	18.2645	20.1565	18.916
206	28.8877	25.444	24.6781	26.648	23.4396	19.0515	23.4735	20.5754	17.6157	17.3253	17.6599	13.191	15.6227	11.5529	15.56	12.4959	17.4599	16.6074	18.5075	14.8076	19.6477	21.503	17.9849	18.8136	13.0392	15.0586	10.3171	12.5704	11.4456	11.8954	12.1234	12.7763	13.964	15.0553	16.9323	19.4072	15.3637	12.8382	11.7565	7.97231	8.092	7.01006	8.02881	5.98757	11.2025	12.0061	15.5018	16.7415	15.0219
207	30.4143	27.0993	26.226	27.3087	23.9734	20.6285	23.2242	20.2556	16.3193	16.8718	16.6911	13.5848	16.2433	13.4505	16.8971	15.4186	19.4577	19.2873	21.6034	18.8101	23.5006	24.5	20.4431	20.1005	15.6197	15.1295	11.411	11.969	11.4961	10.872	11.1233	11.8086	14.027	15.2455	18.2471	20.0394	16.2184	14.7269	10.756	9.12612	6.39365	6.4305	6.51511	6.99399	9.52823	10.5992	14.5519	16.0378	13.9758
208	33.6281	30.2816	29.7599	30.6134	26.984	23.5767	26.7067	23.62	19.0879	19.3885	18.6002	16.0877	16.6625	14.1764	15.973	13.6355	17.0465	16.3419	18.3743	15.2233	18.9194	20.0411	15.7457	15.9514	12.4418	12.3268	9.70647	11.4008	11.7127	11.5645	12.8562	14.258	17.4529	18.8554	21.9816	23.7869	20.1368	18.5571	14.5417	12.8288	9.80596	8.0361	5.88869	6.74639	7.81842	7.75039	11.6069	12.4565	9.34633
209	32.5393	29.3617	28.8502	29.0607	25.4407	22.8159	25.4185	22.0492	17.1467	17.5583	16.3166	14.5197	15.0628	14.4956	16.4468	16.9537	20.1836	20.6255	22.9566	20.9445	25.3452	25.5214	21.376	20.3608	16.5446	14.9531	11.942	11.0557	10.7847	9.68345	10.8918	12.6208	16.2986	18.2468	21.5677	23.3511	20.608	19.772	14.6244	13.3787	8.86478	7.9816	2.22662	7.38317	6.74666	9.90129	12.7439	14.9085	13.0969
210	35.4851	32.3689	31.5104	31.7072	28.3244	25.9401	27.4423	24.4204	19.3184	20.5877	19.4977	18.3029	19.1155	18.5104	20.4391	20.7431	23.7386	24.1977	26.4757	24.2575	27.8986	28.1197	23.7837	23.0442	20.0001	18.3683	15.6593	14.9717	14.8487	13.4743	14.2096	15.503	19.1092	20.5097	23.8789	25.4179	22.0274	21.5503	15.9118	15.5661	11.2934	11.361	6.79642	11.0804	10.5303	13.1496	16.3307	18.0411	15.1149
211	36.8509	33.8273	33.2982	33.0633	29.5223	27.4714	29.3706	26.081	20.5977	21.6326	20.0159	18.4473	18.4663	18.8984	19.3161	20.5855	22.8969	23.4606	26.0622	24.8574	28.4338	27.475	23.5485	21.8489	19.2009	17.2361	15.5742	14.5002	14.8608	13.588	14.9494	17.0136	20.7556	22.6685	25.9983	27.643	24.5841	24.1401	18.4674	17.8464	13.3231	12.771	5.62085	11.3514	9.35624	12.2489	13.8779	16.0151	13.7065
212	33.8509	30.7477	30.8208	30.6898	26.8197	24.2426	27.8582	24.3262	19.4194	18.9634	17.0568	14.3622	13.2545	13.5223	13.5559	14.9418	17.3974	18.0351	20.7645	19.8043	23.6738	22.6733	18.7288	16.9881	14.0509	11.885	9.86565	8.97743	9.62934	9.40235	12.2502	14.7111	18.4864	21.0155	24.2251	26.2652	24.1603	22.6301	18.2793	15.5534	12.1493	9.76204	1.96236	5.73303	3.85108	6.86778	8.56999	10.8953	9.11262
213	38.3325	35.1864	35.2201	35.184	31.3257	28.6059	32.1994	28.6916	23.7006	23.4444	21.607	18.8507	17.4655	17.1246	16.9353	16.823	18.3517	18.4494	20.2112	19.3271	22.2253	20.9367	17.0063	15.6342	13.5367	12.5809	12.4414	12.5022	13.7352	13.944	16.6787	19.0142	22.808	25.3318	28.5503	30.5401	28.3067	26.9618	22.4472	20.0595	16.3215	14.2179	5.946	9.47551	6.89173	8.04103	9.56922	10.4032	7.3851
214	32.5908	29.6038	29.9786	29.5962	25.6673	23.3059	27.2867	23.738	18.9917	18.0569	15.5424	12.9075	10.5185	11.1659	9.88525	12.5264	13.8366	14.7495	17.3725	17.2052	20.5696	18.8528	15.2908	13.015	10.4614	8.52224	8.40984	6.46461	8.71101	7.3659	11.4497	14.4809	18.092	21.2231	24.0604	26.298	25.1217	24.0764	19.8426	16.6106	13.5624	11.2079	3.55437	6.44101	2.47891	3.97315	4.4919	7.02083	5.38695
215	34.2725	30.9484	31.2621	32.0666	28.0331	24.2402	29.7735	26.2234	22.2025	20.6596	19.2446	15.3932	13.3836	11.732	11.9711	10.6255	12.7894	12.6375	13.8318	12.0009	15.0091	14.9188	10.547	10.4496	7.66973	7.15907	6.14138	7.03723	8.96503	10.409	14.0276	16.4312	19.8996	22.3087	25.2558	27.5293	25.7375	23.2279	20.8813	15.7372	14.5139	10.8384	6.74538	4.31836	2.92177	2.05337	5.68278	6.42948	3.06263
216	31.9697	28.6521	28.6716	29.2434	25.4127	21.8946	26.0727	22.6086	18.2053	17.6902	16.501	13.1017	12.1018	10.5238	11.587	10.4693	13.2564	13.5867	15.9403	14.5437	19.0036	18.701	14.6039	13.4184	9.45844	8.08733	5.51997	6.59239	7.21012	7.98563	10.9885	12.7705	16.4102	18.4102	21.631	23.6522	21.2696	19.3468	15.7048	12.5776	9.4858	6.77077	2.9881	2.31189	2.72148	3.21197	7.1944	8.67552	6.57459
217	27.6257	24.1434	23.8813	25.6733	22.0943	17.4657	23.2787	20.0003	16.1194	15.0968	14.3646	10.4582	11.3568	7.70501	11.0315	7.94249	12.5746	12.3661	14.6737	12.1421	17.566	18.7955	15.3083	14.8957	8.83465	9.5911	5.24005	6.69458	6.44751	6.84216	8.66299	10.3379	13.6104	15.2745	17.4416	20.1189	17.557	14.5781	13.2532	7.66536	7.72263	3.82191	2.62658	1.9738	4.09089	5.27238	9.03795	10.7037	9.60219
218	27.7019	24.4254	23.7765	24.4748	20.9363	17.8544	20.7804	17.4781	13.2037	13.419	12.9047	10.3858	11.8489	9.85939	13.5218	13.1539	17.0307	17.4183	19.8963	17.6563	22.7886	23.3917	19.5587	18.7397	13.8608	13.1356	9.01335	8.77776	7.65375	6.8179	7.25339	8.25305	11.3779	12.9712	16.2393	18.0972	15.0775	13.4939	9.56561	7.35349	3.81131	2.53161	2.53873	3.64893	6.79541	8.98926	12.4793	14.4214	13.1374
219	23.4799	20.0025	19.4555	21.3749	17.9558	13.3819	18.2008	15.0526	11.6733	11.5664	11.8389	7.30567	10.561	6.50908	11.5427	10.3227	15.0944	15.6971	17.8805	15.8811	21.2391	22.5568	19.4841	19.2693	12.6561	14.1048	8.74667	9.64222	7.68045	6.83346	6.69384	6.88843	8.48929	9.89655	12.4907	14.9045	11.9034	9.15343	7.41706	3.00532	2.35883	1.95552	3.69579	2.66325	8.838	11.2976	13.7674	16.2975	15.8756
220	23.4399	20.2841	18.8829	20.205	17.3674	13.9427	15.6052	13.246	10.4155	11.6354	12.575	8.62407	13.5925	11.0648	16.0445	15.4823	19.966	20.7052	22.9711	20.4891	25.9162	27.2195	23.9371	23.5294	17.358	18.0156	12.8229	13.2617	11.2611	9.41376	8.18772	6.8796	7.49173	7.93237	10.6107	11.7288	7.85995	7.29978	2.45267	2.68031	2.80467	4.12359	7.49147	6.50493	12.6204	14.9342	17.4975	20.026	19.2365
221	20.8288	17.6504	16.3554	18.3029	15.7318	11.7187	14.5975	12.3626	11.1143	11.4387	12.7846	7.78862	13.0244	9.26886	14.0718	13.1907	17.7048	18.4647	20.3095	18.0201	23.1685	24.8387	22.3515	22.6026	15.729	17.9987	12.6958	14.4684	11.8658	10.6312	9.08881	7.04755	6.84176	6.73592	7.82947	9.96752	6.0172	3.55143	2.54001	2.15569	3.99578	5.54329	9.36312	6.85207	14.3638	16.7472	18.7924	20.9169	20.9195
222	19.7557	17.3922	15.4854	17.8958	16.0139	11.96	13.2894	12.152	9.99295	12.109	14.6956	10.0788	16.1691	13.5131	18.7124	18.2871	22.8926	23.692	25.6083	23.2706	28.4414	30.1296	27.5517	27.6484	20.8673	22.6291	17.208	18.2661	15.4908	14.1527	12.4744	9.21848	8.22298	6.49614	7.32748	7.70995	3.06829	2.26006	2.45476	4.08446	6.48009	9.23391	12.9803	10.8741	18.2817	20.6843	22.7237	25.2748	25.0304
223	15.8679	14.9725	12.2518	15.4338	14.8134	10.5197	12.7768	12.7704	12.6745	12.6681	15.174	9.96704	15.1741	12.3202	16.8569	16.2035	20.632	21.8662	23.5139	21.8316	26.6292	28.3879	26.2575	26.577	19.6769	21.8353	16.7511	18.1983	15.3932	14.9718	13.3114	10.4233	8.98407	7.1154	6.07418	7.65269	4.70997	2.09573	4.21536	5.14294	9.11429	9.08079	14.1082	10.9208	18.7195	21.3417	22.6824	25.1418	25.6913
224	15.2417	15.5191	11.8877	15.7185	15.8305	11.5849	13.4678	14.3282	15.0138	15.1179	18.4835	13.5471	19.3535	17.3349	21.8934	21.3858	25.8423	26.9407	28.4582	26.4728	31.1411	33.0723	31.1832	31.6738	24.7385	27.0581	21.8993	23.2163	20.3127	19.5128	17.5668	13.9416	12.2923	9.16147	6.95592	7.50001	5.89873	4.54688	7.37514	9.31974	13.0893	13.9363	18.8607	16.0005	23.7074	26.2656	27.7923	30.2886	30.5471
225	12.2939	14.0679	10.0229	14.6363	15.5794	11.7814	13.8015	15.1732	16.1419	15.722	19.2561	14.8807	20.4589	19.1027	22.9146	22.8179	26.7756	28.4797	29.6933	28.1345	32.332	34.3427	32.9336	33.5245	26.7976	29.2503	24.3645	25.3336	22.44	21.7403	19.4826	15.8153	13.7196	10.5381	7.78219	9.09851	8.48628	6.35401	9.30636	11.8471	15.5576	16.2526	21.4661	18.3787	26.1996	29.0149	30.0325	32.6993	33.4452
226	15.2143	17.6158	13.3367	18.1327	19.2189	15.6095	17.563	19.3018	20.3454	19.6061	22.9511	18.6061	23.7149	21.8741	25.6339	24.7294	28.9399	30.1253	31.205	29.5718	33.59	35.6834	34.499	35.1624	28.5388	31.3312	26.5775	28.125	25.3611	25.2634	23.3306	19.8114	17.7391	14.7425	11.904	12.866	12.4777	10.3862	13.3652	15.2349	19.3316	19.297	24.7595	21.0371	28.9431	31.4344	32.6257	34.6008	35.5985
227	16.7386	20.345	15.4744	20.6894	22.0522	18.8007	20.4315	22.6272	23.7745	23.0204	26.6386	22.3325	27.4931	25.6308	29.3498	28.0783	32.28	33.0882	33.9	32.1018	35.6979	37.9505	37.2597	38.0859	31.736	34.8947	30.1525	31.8489	29.0958	28.9606	27.0104	23.4042	21.3621	18.1171	15.151	15.5575	15.585	13.7584	16.8417	18.9765	22.8682	22.9977	28.3808	24.7016	32.5898	34.9831	36.2998	38.0842	39.0166
228	18.9039	22.9022	18.1581	23.437	24.8829	21.9805	23.6658	26.1544	27.3455	26.3462	29.919	25.7286	30.5739	28.5319	31.9743	30.3854	34.5547	35.0934	35.6396	33.6207	36.5916	39.2972	39.0261	40.0132	33.8318	37.2448	32.8219	34.7814	32.1271	32.2811	30.4615	26.9048	24.8695	21.7554	18.7503	19.2753	19.3051	17.3848	20.4181	22.3077	26.2924	26.1738	31.6087	27.6877	35.5471	37.5991	39.099	40.4466	41.5967
229	20.333	24.6311	18.8973	24.4816	26.0953	22.8029	23.3682	26.0216	27.1196	27.1231	31.0701	26.6313	32.2595	30.3175	34.3453	32.8771	37.3283	37.9099	38.8247	36.4953	40.022	42.6077	41.8049	42.778	36.1448	39.3591	34.44	36.3199	33.5347	33.0069	30.9737	27.1267	25.2401	21.3218	18.4621	17.9984	18.133	17.0082	20.1384	22.5958	26.4236	27.2653	32.2694	28.9931	36.7518	38.9397	40.6949	42.4	42.8357
230	15.8573	21.4297	15.5756	20.8778	23.2452	21.0398	21.2146	24.9609	27.1809	26.1033	30.7786	27.2311	32.3098	31.2661	34.8892	34.547	38.4057	39.8255	40.821	39.2541	42.8162	45.0323	44.3416	45.0264	38.6545	41.2885	36.7214	37.8837	35.0802	34.4852	32.0292	28.415	25.776	22.1413	18.6133	18.5554	19.5844	18.7338	21.7649	24.6324	28.4562	28.9902	34.4547	31.0553	38.9476	41.6373	42.5314	44.7008	45.9338
231	21.6806	27.3661	21.1654	26.4254	28.9607	26.506	26.1693	29.8093	31.8412	31.4288	35.9666	32.1669	37.6198	36.3748	40.1649	39.3926	43.5277	44.6214	45.5006	43.662	47.2881	49.5832	48.8301	49.631	43.1229	46.0648	41.2529	42.6775	39.8307	39.1392	36.7079	32.8948	30.4587	26.4865	23.2106	22.4927	23.2256	22.7805	25.9208	28.8132	32.6032	33.6163	38.7185	35.5731	43.4371	45.9773	47.2637	49.2998	50.0784
[truncated: 179 more columns]

## Sheet: cgreGFP
	4	5	6	7	8	9	10	11	12	13	14	15	16	17	18	19	20	21	22	23	24	25	26	27	28	29	30	31	32	33	34	35	36	37	38	39	40	41	42	43	44	45	46	47	48	49	50	51	52
4	0	1.3371	3.36064	3.3124	3.38938	5.88518	7.68998	6.05264	11.2505	14.5541	12.71	16.8305	18.764	20.3446	22.8254	24.8692	27.649	29.9411	32.9438	35.2483	36.3219	40.0722	41.3537	38.8846	38.1825	33.7805	32.199	28.94	28.205	24.8494	24.4846	21.003	18.7819	15.1458	14.5596	11.2375	12.4555	15.4461	16.2002	17.8835	18.7645	21.7456	24.187	26.9493	23.9494	31.0805	33.9706	33.3979	37.031
5	1.3371	0	1.33776	3.24244	3.1572	3.94017	6.3506	6.98523	10.4354	13.4824	10.6622	14.6397	16.8193	18.1792	20.9452	22.7744	25.6758	28.0381	31.1741	33.8934	35.3551	39.2163	40.2679	37.3332	36.3284	32.2479	29.9918	26.9139	26.1568	22.716	22.5677	19.0947	17.4171	13.9918	14.2844	11.2634	12.7956	15.9391	16.6274	17.7593	18.1471	20.7794	22.7566	25.3852	22.7115	29.2342	32.1127	31.1514	34.9077
6	3.36064	1.33776	0	1.34052	3.18753	3.07095	3.34148	6.46609	8.95511	11.4841	7.93505	11.9167	13.9075	15.2782	17.9022	19.8663	22.7369	25.1706	28.2514	30.9568	32.2409	36.263	37.3672	34.3253	33.3786	29.1038	27.1875	23.9349	23.1592	19.7949	19.6281	16.2926	14.4044	11.14	11.5186	8.43017	10.838	13.6115	13.9264	14.7313	14.8248	17.6314	19.5431	22.2606	19.3598	26.1261	29.0013	28.308	31.9845
7	3.3124	3.24244	1.34052	0	1.34376	3.07448	2.97434	3.69724	6.44515	9.46154	8.34666	12.5086	14.2262	16.3031	18.9011	21.5217	24.3966	26.7184	29.7083	32.2661	33.3079	37.3776	38.5884	35.6977	34.922	30.3558	28.8796	25.3536	24.1468	20.6935	19.8174	16.2129	13.737	9.96312	9.41918	6.41688	7.82168	10.7585	11.5676	12.9938	14.0964	16.6867	19.4375	22.1271	19.5798	26.7452	29.811	29.4949	33.285
8	3.38938	3.1572	3.18753	1.34376	0	1.33534	3.06301	3.38284	5.21473	8.5023	7.16181	11.4583	14.1539	16.3816	19.5639	21.9464	25.0287	27.7644	30.9079	33.7948	35.0219	39.1573	40.2108	36.9526	35.7841	31.5227	29.175	25.8454	24.4357	20.7483	19.7123	15.8417	14.021	10.2601	10.0684	8.61151	8.40665	12.206	13.4738	14.2638	15.7311	17.4565	20.0593	22.4482	20.7838	27.1416	30.3176	29.5428	33.6343
9	5.88518	3.94017	3.07095	3.07448	1.33534	0	1.34443	3.54697	4.67779	6.51999	3.76765	7.91997	10.3101	12.4935	15.7564	18.318	21.3732	23.8199	27.066	29.9781	31.7514	35.6285	36.3604	33.3246	32.0811	28.0822	25.4495	22.1262	20.5579	16.8591	15.9569	12.1727	10.6777	7.30884	8.66442	7.21298	8.62356	11.5909	12.3303	11.7826	12.9121	14.3964	16.4961	18.847	17.2946	23.3213	26.4816	25.6443	29.7513
10	7.68998	6.3506	3.34148	2.97434	3.06301	1.34443	0	1.33499	3.11571	5.12751	3.88824	7.08152	8.19299	9.98972	12.2566	14.8441	17.7356	20.4481	23.4528	26.2526	27.2852	31.549	32.6707	29.3522	28.3495	23.8395	22.219	18.6575	17.6401	14.362	14.0641	11.0412	8.8525	5.87655	5.15981	3.75398	4.24742	7.00722	8.0738	9.03263	9.27178	11.9219	13.6504	16.4407	13.4508	20.3792	23.3098	23.01	26.6506
11	6.05264	6.98523	6.46609	3.69724	3.38284	3.54697	1.33499	0	1.33053	4.63634	6.13604	10.3905	12.7203	15.2163	18.2285	21.1657	24.2293	27.174	30.1884	33.0696	33.9014	38.3081	39.4045	35.9763	34.8321	30.2661	28.3454	24.7309	22.9937	19.3867	17.9056	13.9941	11.4991	7.59108	5.21848	5.76096	3.16948	7.5156	9.62191	10.7848	12.9341	14.3471	17.3314	20.0771	18.5791	25.351	28.6021	28.3042	32.3353
12	11.2505	10.4354	8.95511	6.44515	5.21473	4.67779	3.11571	1.33053	0	1.32552	3.45064	6.89256	9.41162	12.3485	15.5745	18.76	21.8703	25.0511	28.022	31.0439	31.8254	36.3428	37.1777	33.6393	32.2898	27.8166	25.6286	21.963	19.7847	16.1414	14.1811	10.229	7.94289	4.17219	3.92449	4.97209	4.65811	7.96528	9.14589	8.26418	10.4304	11.2279	13.9541	16.4884	15.6952	21.9027	25.2629	25.0185	29.1833
13	14.5541	13.4824	11.4841	9.46154	8.5023	6.51999	5.12751	4.63634	1.32552	0	1.33145	4.65948	7.5141	10.7642	13.9237	17.452	20.4447	23.8321	26.5718	29.644	30.1525	34.7893	35.3797	31.7139	30.1865	25.7839	23.4752	19.5676	17.0443	13.6282	10.5294	6.96579	3.72411	3.47924	3.53421	5.65425	5.7206	6.51385	8.71214	5.47715	7.28661	5.68598	9.39151	12.088	13.2338	18.2737	21.7637	21.9107	26.1805
14	12.71	10.6622	7.93505	8.34666	7.16181	3.76765	3.88824	6.13604	3.45064	1.33145	0	1.35946	3.67999	6.93509	10.2406	13.6024	16.721	20.0842	23.023	26.2162	27.1821	31.6777	32.0939	28.5222	26.9082	22.7572	20.0442	16.4359	13.9756	10.2945	8.32511	4.37116	3.24791	2.89094	5.121	6.41704	8.26712	9.60258	10.3331	7.15151	7.92655	7.10875	9.17637	11.116	11.0648	16.146	19.5177	19.1067	23.3488
15	16.8305	14.6397	11.9167	12.5086	11.4583	7.91997	7.08152	10.3905	6.89256	4.65948	1.35946	0	1.32402	4.29022	7.77643	11.0616	14.2967	17.6644	20.7253	24.047	25.3975	29.7466	29.885	26.3948	24.6153	20.7685	17.4658	14.0651	11.8021	7.98425	6.86164	3.49819	4.36647	4.84959	7.65128	9.48632	11.7023	12.6837	12.7054	9.33751	8.91456	7.54378	8.68475	10.4679	10.343	14.4655	17.7019	16.7851	21.0767
16	18.764	16.8193	13.9075	14.2262	14.1539	10.3101	8.19299	12.7203	9.41162	7.5141	3.67999	1.32402	0	1.34394	2.99699	7.06933	9.02749	12.2959	14.5959	17.2886	17.5684	22.1979	23.2395	19.6092	18.6936	13.6217	12.9156	8.83751	7.71076	4.04132	3.62924	2.82994	3.83542	4.01302	7.19578	9.50439	12.2469	12.3172	9.92583	7.28929	3.52867	4.41158	3.82686	6.8173	2.66665	10.2554	12.8627	12.9424	16.9462
17	20.3446	18.1792	15.2782	16.3031	16.3816	12.4935	9.98972	15.2163	12.3485	10.7642	6.93509	4.29022	1.34394	0	1.33572	4.1473	7.59752	10.9623	14.0605	17.4535	19.1809	23.3299	23.2486	19.8614	18.0647	14.1588	10.3864	7.65734	6.34883	3.39531	4.83012	5.06826	6.46007	7.45225	10.6938	12.7972	15.5383	16.0354	14.3278	11.3239	8.7331	7.91342	7.34944	7.76036	6.59316	10.0414	12.6332	10.5693	14.6703
18	22.8254	20.9452	17.9022	18.9011	19.5639	15.7564	12.2566	18.2285	15.5745	13.9237	10.2406	7.77643	2.99699	1.33572	0	1.3324	4.19466	7.64963	10.3005	13.384	14.6055	18.931	19.3626	15.8427	14.3169	10.232	7.236	3.79703	3.37779	2.78077	4.95556	6.34602	8.49105	9.66366	12.3863	14.4927	17.2507	17.0845	13.93	12.0562	7.62111	8.29606	6.06024	6.92757	3.6022	7.12281	9.26942	8.01144	11.4482
19	24.8692	22.7744	19.8663	21.5217	21.9464	18.318	14.8441	21.1657	18.76	17.452	13.6024	11.0616	7.06933	4.1473	1.3324	0	1.32572	4.28021	7.5268	11.0072	13.4873	17.1602	16.804	13.6544	11.981	7.96974	6.03121	3.4926	3.56153	4.90217	7.56332	9.70649	12.1606	13.4933	16.421	18.3445	21.1253	21.4199	18.3744	16.4298	12.1915	12.3564	10.0607	9.03394	6.97795	8.10784	10.0647	8.5268	10.9966
20	27.649	25.6758	22.7369	24.3966	25.0287	21.3732	17.7356	24.2293	21.8703	20.4447	16.721	14.2967	9.02749	7.59752	4.19466	1.32572	0	1.33331	3.6974	6.28812	7.77493	11.8184	12.2224	8.73504	7.94337	3.62759	3.28424	2.86992	5.14224	6.20292	9.59078	12.2649	14.8488	16.3339	19.1281	21.0589	23.7496	23.1146	19.0948	18.3876	13.51	14.5745	11.8569	10.2225	7.36193	7.12058	7.69499	6.72513	7.33898
21	29.9411	28.0381	25.1706	26.7184	27.7644	23.8199	20.4481	27.174	25.0511	23.8321	20.0842	17.6644	12.2959	10.9623	7.64963	4.28021	1.33331	0	1.33806	4.50066	7.64798	10.7392	10.4461	7.6267	6.79553	3.67591	4.75387	5.12881	6.71083	9.48096	12.9721	15.7354	18.2729	19.6271	22.2686	24.0333	26.7578	26.8139	23.0338	21.9025	17.0899	17.8708	15.0414	13.3007	10.511	9.3664	9.41692	8.61853	8.10125
22	32.9438	31.1741	28.2514	29.7083	30.9079	27.066	23.4528	30.1884	28.022	26.5718	23.023	20.7253	14.5959	14.0605	10.3005	7.5268	3.6974	1.33806	0	1.33108	4.2424	7.48396	6.63334	3.86917	3.24901	2.80527	4.97553	6.00112	9.28562	11.8033	15.3323	18.2856	20.8487	22.3386	24.8726	26.6848	29.37	29.0212	25.0604	24.1429	19.2174	20.1049	17.0945	15.1104	12.2516	10.2087	8.60819	9.41443	7.23641
23	35.2483	33.8934	30.9568	32.2661	33.7948	29.9781	26.2526	33.0696	31.0439	29.644	26.2162	24.047	17.2886	17.4535	13.384	11.0072	6.28812	4.50066	1.33108	0	1.33601	3.98586	2.89283	3.29451	4.28157	3.98924	7.39122	9.17324	12.5756	15.1513	18.6142	21.5385	23.9482	25.3259	27.6477	29.3453	31.9567	31.3049	27.2271	26.6351	21.7455	22.9474	19.92	18.1062	14.8624	13.0389	10.1814	12.3069	9.21684
24	36.3219	35.3551	32.2409	33.3079	35.0219	31.7514	27.2852	33.9014	31.8254	30.1525	27.1821	25.3975	17.5684	19.1809	14.6055	13.4873	7.77493	7.64798	4.2424	1.33601	0	1.34528	3.08407	2.85577	5.00421	3.64996	9.29766	9.18454	14.2345	16.5517	19.6831	22.4427	24.4686	25.835	27.8083	29.5028	31.9692	30.5135	26.4367	26.1901	21.4576	22.8073	19.9892	18.3906	14.8618	14.1105	10.6649	13.8085	10.3072
25	40.0722	39.2163	36.263	37.3776	39.1573	35.6285	31.549	38.3081	36.3428	34.7893	31.6777	29.7466	22.1979	23.3299	18.931	17.1602	11.8184	10.7392	7.48396	3.98586	1.34528	0	1.33449	3.23299	6.45271	7.16548	12.4796	13.5558	18.0446	20.6895	23.98	26.882	29.1026	30.4549	32.4809	34.1124	36.5858	35.2097	31.1406	30.9481	26.2045	27.5141	24.6462	22.7969	19.3259	17.8346	13.7136	16.8602	13.1245
26	41.3537	40.2679	37.3672	38.5884	40.2108	36.3604	32.6707	39.4045	37.1777	35.3797	32.0939	29.885	23.2395	23.2486	19.3626	16.804	12.2224	10.4461	6.63334	2.89283	3.08407	1.33449	0	1.33441	3.31196	6.78763	10.3289	13.5068	16.9047	20.0887	23.5298	26.774	29.4664	31.2119	33.6357	35.5177	38.1036	37.0139	32.9107	32.3809	27.4776	28.18	25.1679	22.6525	19.4464	16.5292	12.1324	14.051	10.226
27	38.8846	37.3332	34.3253	35.6977	36.9526	33.3246	29.3522	35.9763	33.6393	31.7139	28.5222	26.3948	19.6092	19.8614	15.8427	13.6544	8.73504	7.6267	3.86917	3.29451	2.85577	3.23299	1.33441	0	1.32524	3.5361	7.48793	9.97173	13.6148	16.6303	20.0033	23.1605	25.7866	27.5692	29.9913	31.9461	34.5606	33.5668	29.4541	28.686	23.7812	24.4287	21.4272	18.9676	15.7146	13.2423	9.00022	11.7919	7.76884
28	38.1825	36.3284	33.3786	34.922	35.7841	32.0811	28.3495	34.8321	32.2898	30.1865	26.9082	24.6153	18.6936	18.0647	14.3169	11.981	7.94337	6.79553	3.24901	4.28157	5.00421	6.45271	3.31196	1.32524	0	1.3323	4.65024	7.94461	11.2556	14.5333	17.9359	21.2469	24.1721	26.2256	28.9258	31.0599	33.7531	32.9822	29.0504	27.8818	22.9447	23.1129	20.0528	17.1166	13.9473	10.7313	6.43649	8.15427	4.23253
29	33.7805	32.2479	29.1038	30.3558	31.5227	28.0822	23.8395	30.2661	27.8166	25.7839	22.7572	20.7685	13.6217	14.1588	10.232	7.96974	3.62759	3.67591	2.80527	3.98924	3.64996	7.16548	6.78763	3.5361	1.3323	0	1.33043	4.12681	7.71763	10.9497	14.2727	17.3731	19.9079	21.6231	23.9689	25.9849	28.5846	27.5346	23.4282	22.5855	17.6851	18.4313	15.458	13.165	9.86743	7.74534	4.13087	6.31314	3.2808
30	32.199	29.9918	27.1875	28.8796	29.175	25.4495	22.219	28.3454	25.6286	23.4752	20.0442	17.4658	12.9156	10.3864	7.236	6.03121	3.28424	4.75387	4.97553	7.39122	9.29766	12.4796	10.3289	7.48793	4.65024	1.33043	0	1.33713	3.77087	7.6104	10.9966	14.3501	17.4403	19.7246	22.6585	25.0061	27.741	26.9358	23.5725	21.9065	17.0539	16.6308	13.6251	10.2111	7.44085	3.83584	3.29821	2.89353	3.05198
31	28.94	26.9139	23.9349	25.3536	25.8454	22.1262	18.6575	24.7309	21.963	19.5676	16.4359	14.0651	8.83751	7.65734	3.79703	3.4926	2.86992	5.12881	6.00112	9.17324	9.18454	13.5558	13.5068	9.97173	7.94461	4.12681	1.33713	0	1.3418	4.19849	7.68975	10.7863	13.496	15.7673	18.5063	20.9557	23.6232	22.4503	19.0539	17.3908	12.5534	12.2619	9.20255	6.63594	3.67919	3.2815	4.35689	4.65205	5.72288
32	28.205	26.1568	23.1592	24.1468	24.4357	20.5579	17.6401	22.9937	19.7847	17.0443	13.9756	11.8021	7.71076	6.34883	3.37779	3.56153	5.14224	6.71083	9.28562	12.5756	14.2345	18.0446	16.9047	13.6148	11.2556	7.71763	3.77087	1.3418	0	1.32897	4.33154	7.73515	11.0218	13.6484	16.82	19.4307	22.1477	21.2331	18.6981	16.2357	11.9492	10.3577	7.69708	3.84922	3.41693	2.83874	5.06419	3.70612	7.32554
33	24.8494	22.716	19.7949	20.6935	20.7483	16.8591	14.362	19.3867	16.1414	13.6282	10.2945	7.98425	4.04132	3.39531	2.78077	4.90217	6.20292	9.48096	11.8033	15.1513	16.5517	20.6895	20.0887	16.6303	14.5333	10.9497	7.6104	4.19849	1.32897	0	1.3365	4.36688	7.68849	10.3526	13.6725	16.277	18.9973	18.2247	16.1853	13.2876	9.54908	7.59424	5.56747	3.24669	3.59663	4.86674	7.42252	6.92607	10.6597
34	24.4846	22.5677	19.6281	19.8174	19.7123	15.9569	14.0641	17.9056	14.1811	10.5294	8.32511	6.86164	3.62924	4.83012	4.95556	7.56332	9.59078	12.9721	15.3323	18.6142	19.6831	23.98	23.5298	20.0033	17.9359	14.2727	10.9966	7.68975	4.33154	1.3365	0	1.33117	4.77799	8.08996	11.3708	14.3217	16.8573	15.5451	14.314	10.9382	8.15577	4.55889	3.51165	2.92293	5.06651	6.20681	9.53473	9.24958	13.4114
35	21.003	19.0947	16.2926	16.2129	15.8417	12.1727	11.0412	13.9941	10.229	6.96579	4.37116	3.49819	2.82994	5.06826	6.34602	9.70649	12.2649	15.7354	18.2856	21.5385	22.4427	26.882	26.774	23.1605	21.2469	17.3731	14.3501	10.7863	7.73515	4.36688	1.33117	0	1.32711	4.62943	7.92674	10.8932	13.3453	12.3567	11.7794	7.92738	6.78673	3.07404	3.92373	4.91701	7.02965	9.37086	12.8105	12.6278	16.8611
36	18.7819	17.4171	14.4044	13.737	14.021	10.6777	8.8525	11.4991	7.94289	3.72411	3.24791	4.36647	3.83542	6.46007	8.49105	12.1606	14.8488	18.2729	20.8487	23.9482	24.4686	29.1026	29.4664	25.7866	24.1721	19.9079	17.4403	13.496	11.0218	7.68849	4.77799	1.32711	0	1.32559	4.36737	7.3689	9.8449	8.92622	7.86029	4.12478	3.53929	2.80725	4.99064	6.73537	7.47099	12.4026	15.8601	16.1511	20.2247
37	15.1458	13.9918	11.14	9.96312	10.2601	7.30884	5.87655	7.59108	4.17219	3.47924	2.89094	4.84959	4.01302	7.45225	9.66366	13.4933	16.3339	19.6271	22.3386	25.3259	25.835	30.4549	31.2119	27.5692	26.2256	21.6231	19.7246	15.7673	13.6484	10.3526	8.08996	4.62943	1.32559	0	1.33423	3.90929	6.42399	6.86405	6.49603	3.54911	4.42216	5.13401	7.40148	9.90442	9.16338	15.3756	18.7319	19.0552	22.999
38	14.5596	14.2844	11.5186	9.41918	10.0684	8.66442	5.15981	5.21848	3.92449	3.53421	5.121	7.65128	7.19578	10.6938	12.3863	16.421	19.1281	22.2686	24.8726	27.6477	27.8083	32.4809	33.6357	29.9913	28.9258	23.9689	22.6585	18.5063	16.82	13.6725	11.3708	7.92674	4.36737	1.33423	0	1.33621	2.78688	2.81809	2.7735	2.78742	4.88167	6.22799	9.42009	12.5322	11.1868	18.296	21.5971	22.3105	26.0767
39	11.2375	11.2634	8.43017	6.41688	8.61151	7.21298	3.75398	5.76096	4.97209	5.65425	6.41704	9.48632	9.50439	12.7972	14.4927	18.3445	21.0589	24.0333	26.6848	29.3453	29.5028	34.1124	35.5177	31.9461	31.0599	25.9849	25.0061	20.9557	19.4307	16.277	14.3217	10.8932	7.3689	3.90929	1.33621	0	1.34205	3.23632	3.54666	5.03235	7.00127	9.17063	12.4416	15.5806	13.5368	21.116	24.3352	24.9957	28.6822
40	12.4555	12.7956	10.838	7.82168	8.40665	8.62356	4.24742	3.16948	4.65811	5.7206	8.26712	11.7023	12.2469	15.5383	17.2507	21.1253	23.7496	26.7578	29.37	31.9567	31.9692	36.5858	38.1036	34.5606	33.7531	28.5846	27.741	23.6232	22.1477	18.9973	16.8573	13.3453	9.8449	6.42399	2.78688	1.34205	0	1.34309	3.61618	5.89247	8.79799	11.0265	14.6739	17.9556	16.0681	23.7023	26.9366	27.6976	31.3859
41	15.4461	15.9391	13.6115	10.7585	12.206	11.5909	7.00722	7.5156	7.96528	6.51385	9.60258	12.6837	12.3172	16.0354	17.0845	21.4199	23.1146	26.8139	29.0212	31.3049	30.5135	35.2097	37.0139	33.5668	32.9822	27.5346	26.9358	22.4503	21.2331	18.2247	15.5451	12.3567	8.92622	6.86405	2.81809	3.23632	1.34309	0	1.34254	2.90768	6.33974	7.65945	12.1794	15.7127	14.7395	21.9727	25.2064	26.6094	30.1487
42	16.2002	16.6274	13.9264	11.5676	13.4738	12.3303	8.0738	9.62191	9.14589	8.71214	10.3331	12.7054	9.92583	14.3278	13.93	18.3744	19.0948	23.0338	25.0604	27.2271	26.4367	31.1406	32.9107	29.4541	29.0504	23.4282	23.5725	19.0539	18.6981	16.1853	14.314	11.7794	7.86029	6.49603	2.7735	3.54666	3.61618	1.34254	0	1.34162	3.79077	7.29495	10.4347	13.9403	11.1328	19.388	22.2968	24.2029	27.1928
43	17.8835	17.7593	14.7313	12.9938	14.2638	11.7826	9.03263	10.7848	8.26418	5.47715	7.15151	9.33751	7.28929	11.3239	12.0562	16.4298	18.3876	21.9025	24.1429	26.6351	26.1901	30.9481	32.3809	28.686	27.8818	22.5855	21.9065	17.3908	16.2357	13.2876	10.9382	7.92738	4.12478	3.54911	2.78742	5.03235	5.89247	2.90768	1.34162	0	1.33343	3.95577	7.65449	11.18	9.63375	17.1465	20.2994	21.688	25.2054
44	18.7645	18.1471	14.8248	14.0964	15.7311	12.9121	9.27178	12.9341	10.4304	7.28661	7.92655	8.91456	3.52867	8.7331	7.62111	12.1915	13.51	17.0899	19.2174	21.7455	21.4576	26.2045	27.4776	23.7812	22.9447	17.6851	17.0539	12.5534	11.9492	9.54908	8.15577	6.78673	3.53929	4.42216	4.88167	7.00127	8.79799	6.33974	3.79077	1.33343	0	1.34015	4.34675	7.8023	4.72584	12.7916	15.7916	17.4537	20.5627
45	21.7456	20.7794	17.6314	16.6867	17.4565	14.3964	11.9219	14.3471	11.2279	5.68598	7.10875	7.54378	4.41158	7.91342	8.29606	12.3564	14.5745	17.8708	20.1049	22.9474	22.8073	27.5141	28.18	24.4287	23.1129	18.4313	16.6308	12.2619	10.3577	7.59424	4.55889	3.07404	2.80725	5.13401	6.22799	9.17063	11.0265	7.65945	7.29495	3.95577	1.34015	0	1.33181	4.672	6.07037	11.0398	14.3606	15.617	19.3233
46	24.187	22.7566	19.5431	19.4375	20.0593	16.4961	13.6504	17.3314	13.9541	9.39151	9.17637	8.68475	3.82686	7.34944	6.06024	10.0607	11.8569	15.0414	17.0945	19.92	19.9892	24.6462	25.1679	21.4272	20.0528	15.458	13.6251	9.20255	7.69708	5.56747	3.51165	3.92373	4.99064	7.40148	9.42009	12.4416	14.6739	12.1794	10.4347	7.65449	4.34675	1.33181	0	1.33047	3.72719	7.59908	10.8623	12.7452	16.029
47	26.9493	25.3852	22.2606	22.1271	22.4482	18.847	16.4407	20.0771	16.4884	12.088	11.116	10.4679	6.8173	7.76036	6.92757	9.03394	10.2225	13.3007	15.1104	18.1062	18.3906	22.7969	22.6525	18.9676	17.1166	13.165	10.2111	6.63594	3.84922	3.24669	2.92293	4.91701	6.73537	9.90442	12.5322	15.5806	17.9556	15.7127	13.9403	11.18	7.8023	4.672	1.33047	0	1.33588	3.86572	7.58556	8.81927	12.4001
48	23.9494	22.7115	19.3598	19.5798	20.7838	17.2946	13.4508	18.5791	15.6952	13.2338	11.0648	10.343	2.66665	6.59316	3.6022	6.97795	7.36193	10.511	12.2516	14.8624	14.8618	19.3259	19.4464	15.7146	13.9473	9.86743	7.44085	3.67919	3.41693	3.59663	5.06651	7.02965	7.47099	9.16338	11.1868	13.5368	16.0681	14.7395	11.1328	9.63375	4.72584	6.07037	3.72719	1.33588	0	1.32767	4.21998	6.86298	9.50847
49	31.0805	29.2342	26.1261	26.7452	27.1416	23.3213	20.3792	25.351	21.9027	18.2737	16.146	14.4655	10.2554	10.0414	7.12281	8.10784	7.12058	9.3664	10.2087	13.0389	14.1105	17.8346	16.5292	13.2423	10.7313	7.74534	3.83584	3.2815	2.83874	4.86674	6.20681	9.37086	12.4026	15.3756	18.296	21.116	23.7023	21.9727	19.388	17.1465	12.7916	11.0398	7.59908	3.86572	1.32767	0	1.34173	3.19804	5.87458
50	33.9706	32.1127	29.0013	29.811	30.3176	26.4816	23.3098	28.6021	25.2629	21.7637	19.5177	17.7019	12.8627	12.6332	9.26942	10.0647	7.69499	9.41692	8.60819	10.1814	10.6649	13.7136	12.1324	9.00022	6.43649	4.13087	3.29821	4.35689	5.06419	7.42252	9.53473	12.8105	15.8601	18.7319	21.5971	24.3352	26.9366	25.2064	22.2968	20.2994	15.7916	14.3606	10.8623	7.58556	4.21998	1.34173	0	1.32454	3.19225
51	33.3979	31.1514	28.308	29.4949	29.5428	25.6443	23.01	28.3042	25.0185	21.9107	19.1067	16.7851	12.9424	10.5693	8.01144	8.5268	6.72513	8.61853	9.41443	12.3069	13.8085	16.8602	14.051	11.7919	8.15427	6.31314	2.89353	4.65205	3.70612	6.92607	9.24958	12.6278	16.1511	19.0552	22.3105	24.9957	27.6976	26.6094	24.2029	21.688	17.4537	15.617	12.7452	8.81927	6.86298	3.19804	1.32454	0	1.33343
52	37.031	34.9077	31.9845	33.285	33.6343	29.7513	26.6506	32.3353	29.1833	26.1805	23.3488	21.0767	16.9462	14.6703	11.4482	10.9966	7.33898	8.10125	7.23641	9.21684	10.3072	13.1245	10.226	7.76884	4.23253	3.2808	3.05198	5.72288	7.32554	10.6597	13.4114	16.8611	20.2247	22.999	26.0767	28.6822	31.3859	30.1487	27.1928	25.2054	20.5627	19.3233	16.029	12.4001	9.50847	5.87458	3.19225	1.33343	0
53	38.6871	36.8357	33.726	34.6307	35.2046	31.3654	28.0746	33.5056	30.1902	26.5361	24.4507	22.6038	17.4398	17.0329	13.6711	13.6082	10.3659	11.7469	10.7254	12.5968	13.0754	15.4592	12.6598	10.3873	6.99572	6.55906	5.8638	7.749	9.2957	12.1893	14.4294	17.7061	20.7468	23.6298	26.4206	29.1383	31.714	29.8123	26.7165	24.9036	20.4035	19.0272	15.3292	11.3112	8.55801	6.18468	3.09146	3.37701	1.33171
54	39.6157	37.9434	34.7558	35.6614	36.5143	32.7498	29.0908	34.7359	31.583	28.2079	26.024	24.2802	18.1403	18.7699	15.1874	14.5267	10.6441	11.6717	9.53865	10.7473	10.1488	12.4017	10.7361	7.6374	6.09821	5.1908	7.25618	8.11784	11.023	13.8953	16.3072	19.5039	22.2966	24.9404	27.5059	30.0877	32.6205	30.6739	27.1562	25.7065	21.1449	20.254	16.4995	13.1336	10.0184	8.22787	3.91147	6.74187	4.46049
55	35.009	33.5973	30.3635	31.0981	32.3105	28.7987	24.6814	30.4039	27.5419	24.4749	22.4627	20.9499	13.5118	15.1911	11.1633	10.9594	6.47203	8.83434	7.61289	8.70389	7.74502	11.3568	11.031	7.21864	7.46646	3.4907	5.98775	3.76185	8.58448	11.036	13.7573	16.7036	18.8325	20.9172	23.043	25.3637	27.7987	25.8123	21.8807	20.9353	16.3644	16.41	12.9897	11.3538	8.07192	7.1687	3.9136	7.45028	6.44887
56	38.4535	36.9049	33.7179	34.857	35.8871	32.3482	28.2474	34.3564	31.5775	28.9224	26.2699	24.4499	17.4769	18.4527	14.4654	13.4827	8.5932	9.65085	6.88624	7.16886	5.68504	7.96698	7.34893	3.70152	5.06298	3.51166	6.89458	7.24347	11.3756	14.2679	17.1543	20.3006	22.8934	25.0778	27.4775	29.7618	32.312	30.7555	26.7464	25.7281	20.9715	20.9577	17.5189	15.1722	11.6181	9.83353	5.0992	8.93469	6.163
57	36.0982	34.9093	31.634	32.5404	33.9915	30.7371	26.2223	32.359	29.8893	27.0843	25.1029	23.6209	15.5276	17.9288	13.3694	13.4105	7.86423	9.96981	8.02009	7.24423	3.79779	7.11187	9.00773	4.74297	8.70543	4.30332	9.61584	6.75226	12.5018	14.5617	17.0864	19.7306	21.6931	23.5066	25.4276	27.4166	29.8211	27.7246	23.8031	23.2126	18.7555	19.0335	15.5706	14.2855	10.9353	10.9197	7.85417	11.6479	9.61308
58	35.0097	34.0658	30.6963	31.2279	32.7956	29.5938	25.1234	30.7687	28.214	25.2374	23.7167	22.6889	14.2681	17.833	13.4195	14.7285	9.68325	12.9438	11.4087	11.5454	7.78117	10.7507	13.2582	8.18988	12.1944	7.84001	12.0117	7.63786	13.325	14.5901	16.5283	18.7473	19.9252	21.7273	23.3357	25.345	27.5712	24.9117	21.0685	20.798	16.5684	17.3973	14.3013	13.7393	10.6315	11.7916	9.8284	13.2342	12.6167
59	32.0454	30.6174	27.3183	27.865	28.9217	25.2669	21.4897	26.8732	23.784	20.4844	18.5549	17.2298	10.2732	12.4498	8.97362	10.5434	7.89978	10.8865	10.9417	12.76	10.4405	14.4499	16.0591	11.3758	11.4322	7.39321	6.62626	3.92612	6.8354	8.21387	9.97217	12.5978	14.7696	17.081	19.3808	21.9021	24.234	21.5901	17.7378	17.3937	12.8673	12.4118	8.95399	7.16664	3.71039	4.38141	3.918	6.84022	8.77191
60	31.4846	30.9027	27.512	27.7518	29.5989	26.7438	22.1053	27.4476	25.2228	22.5544	21.4687	20.918	12.1276	16.9967	12.7968	15.245	10.1438	14.8612	13.6923	14.5056	11.359	15.6668	17.8451	13.5038	15.5585	10.3231	13.5382	8.90196	13.9738	14.3079	15.8485	17.6174	17.399	18.8365	20.1252	21.7778	23.7846	20.7385	16.9996	17.3431	13.6001	15.3404	12.5126	12.7753	9.6061	12.2687	11.3638	14.5666	14.9258
61	31.3799	30.8297	27.5158	28.0222	29.9055	27.2347	22.3455	28.3434	26.3749	24.2384	22.3718	21.4246	12.566	16.6774	12.047	13.5682	7.95749	11.7988	10.7898	10.8684	7.32746	11.3813	13.6339	9.87924	12.9961	7.53393	13.045	8.26509	13.8713	14.5861	16.532	18.3712	18.7044	20.0817	21.5992	23.1756	25.3483	22.9076	19.0029	19.2228	15.0466	16.8284	14.2688	14.4162	10.8483	13.6137	11.7822	14.9683	13.9409
62	28.4512	27.4262	24.0924	24.8355	26.4269	23.3533	18.6682	24.7427	22.5297	20.7548	18.273	17.1134	8.3596	12.2083	7.64032	9.35435	3.95441	7.49162	6.34207	7.41876	5.84727	10.6073	12.3016	9.17823	10.043	4.15983	8.52517	3.9622	9.4599	10.4228	12.5762	14.3672	14.9839	16.3219	18.0709	19.7972	22.1854	20.525	16.4388	16.2055	11.6077	13.5481	11.0967	10.4807	7.04157	9.04115	8.24496	10.7772	10.8027
63	25.8107	24.9693	21.5868	22.1024	23.7842	20.8343	16.1218	21.8867	19.3568	16.5681	15.4695	15.1207	6.2831	11.3317	7.49236	10.6742	6.97245	11.8976	11.6183	12.9489	10.9435	15.6615	17.5809	14.374	14.8804	8.85927	12.0262	7.06213	11.3607	10.2544	11.3181	11.8533	11.3194	12.8758	14.2692	16.2186	18.393	15.7733	11.9886	11.6636	7.59407	9.43376	7.88722	9.33804	4.75573	10.8464	11.6063	13.9555	14.5524
64	24.1053	23.5648	20.2776	20.7951	22.7178	20.4318	15.3462	21.5778	20.0884	19.422	16.8673	15.9025	7.63197	11.6912	8.33671	10.5795	6.90549	11.667	12.2593	13.6911	12.0566	16.3124	18.5179	16.1525	16.7795	10.7255	13.7615	9.14268	13.1664	12.4214	14.076	14.9696	13.9887	14.4777	15.946	16.8285	19.1798	17.8276	13.8673	14.4889	9.66677	13.4147	11.5383	12.7693	7.93601	13.2137	14.0696	16.0976	16.7505
65	24.2688	23.0874	19.8602	20.8352	22.5459	19.6706	14.7983	21.4266	19.6892	18.9225	15.783	14.2579	6.45744	8.98062	5.30208	7.03014	3.71953	8.24181	8.58226	9.79604	8.88303	13.2163	15.0543	12.6003	13.3538	7.7048	10.8868	7.26499	10.5921	9.9928	11.943	13.2431	13.5057	14.1809	16.041	17.3384	19.8441	19.3053	15.374	15.1744	10.5958	13.329	10.8914	11.9917	7.1542	11.9638	12.6949	14.0748	14.0294
66	22.6559	21.3486	18.0306	18.9394	20.2105	16.9872	12.4594	18.6961	16.4995	15.2762	12.2468	10.9647	2.67293	6.52574	3.56793	5.89109	3.6087	7.29811	8.7851	11.3715	11.7233	16.2863	17.006	13.3269	12.4515	7.32029	7.34834	3.76257	6.10045	6.07882	8.56098	9.639	9.79073	10.6998	12.6982	14.384	17.002	16.5663	12.7266	11.9225	7.21782	9.65893	7.41966	7.42097	3.67268	7.05414	8.13467	9.71054	11.1845
67	19.0691	18.0597	14.8237	15.6683	17.4823	15.0926	10.095	16.8172	14.9411	13.5691	11.7304	11.5692	3.79456	8.343	5.8338	9.03081	7.11241	11.4964	13.1389	15.1747	14.7687	19.4263	21.0151	17.6237	17.4092	11.7358	12.8404	9.0034	10.4748	9.23562	10.5548	10.1436	8.11393	8.80617	10.17	11.6887	13.9914	12.5876	8.47437	8.35391	3.88793	7.54293	7.19494	9.74379	3.82101	11.5345	13.3042	15.0906	16.6357
70	16.2609	15.6994	12.3057	12.5106	14.2995	12.1717	7.22862	12.761	11.6885	11.831	9.12292	8.26775	3.571	6.06386	5.64665	8.68397	10.7538	13.4168	16.0873	18.5732	18.6419	23.0605	24.62	21.5461	20.9463	15.9289	15.5919	11.9734	11.7298	9.67892	10.1939	9.04025	6.95392	6.81294	8.19626	7.95939	10.5955	10.6698	7.61917	8.1729	4.03056	7.85178	7.78591	10.8378	5.85193	14.0354	16.6418	17.1327	19.9158
71	13.9066	14.0618	10.8986	10.3937	12.5317	11.8465	7.23763	11.9344	12.1321	13.2577	10.5045	11.7185	7.94064	10.9121	10.1014	13.2031	13.5318	16.8592	19.092	20.5555	19.5415	23.6796	25.7338	23.4837	24.0872	18.3544	19.4543	15.9801	16.1393	14.33	14.6478	13.2021	10.6079	9.35751	9.08915	6.94942	9.78205	10.1803	7.97102	9.3376	5.98109	11.4675	12.1829	15.2379	9.85998	18.0936	20.3789	21.524	23.5913
72	11.2543	11.0178	7.73615	7.42907	9.26664	8.06943	3.95002	8.24877	8.61502	10.1376	6.96431	8.27697	7.04414	9.13286	9.87307	12.5535	15.0149	17.4449	20.2353	22.7872	23.586	27.833	29.124	25.9741	25.2868	20.5025	19.8883	16.2385	15.7979	13.1303	13.4503	11.449	9.35145	7.40819	6.79052	3.98094	7.31638	9.20502	7.61233	8.6502	6.94884	11.2865	12.2276	15.218	10.9833	18.4172	21.043	21.218	24.3417
73	13.5042	12.5989	9.37818	9.11422	10.1929	6.89345	3.71534	8.15393	6.07791	6.39967	3.63265	4.43508	3.76593	6.51412	7.85467	11.4506	14.2124	17.2142	20.0104	22.8586	23.5271	28.0292	29.0686	25.5502	24.4893	19.7337	18.4505	14.6476	13.2151	10.1698	9.50514	7.09181	4.9202	3.48782	4.04841	3.34888	5.46201	5.39948	3.27555	4.45286	3.80987	7.11885	8.44324	11.3428	8.26096	15.5066	18.5267	18.802	22.3671
74	12.4946	13.2295	10.4257	8.72639	10.8355	10.5885	7.03783	9.30791	9.96411	11.1728	10.1815	11.9932	10.329	13.5427	13.4262	17.2102	18.2965	21.7441	24.0594	26.2219	25.9831	30.4602	32.161	29.0745	28.7768	23.2999	23.5832	19.6088	19.1875	16.7544	15.7789	13.2281	9.68879	7.71759	6.10269	3.85643	5.84587	6.00884	4.33496	6.46012	5.73264	10.4974	13.3163	16.3449	12.2164	20.8214	23.5779	24.8195	27.7176
75	13.6527	15.0229	12.5977	10.0223	12.4356	12.4192	8.69568	10.4346	11.0301	11.8904	12.2528	14.6122	13.0904	16.6108	16.6392	20.6174	21.4781	25.1492	27.3495	29.4008	28.8446	33.3515	35.1757	32.1244	31.9232	26.3021	26.7334	22.5577	22.1719	19.652	18.2277	15.3994	11.5962	9.19013	5.99081	3.47112	3.64632	4.08055	3.75794	6.1081	8.051	11.9703	15.1545	18.4821	14.8655	23.4841	26.3092	27.8079	30.7694
76	10.9166	12.5814	10.5594	7.57293	10.5121	12.0568	8.83477	9.51412	11.7007	12.9455	13.46	16.2187	15.1766	18.0674	17.737	20.9541	21.3284	24.6859	26.7233	28.219	27.7918	31.7478	33.6628	31.4927	31.8522	26.3737	27.4016	23.7721	23.7489	21.4995	20.9237	17.9278	14.2788	11.3098	8.01292	4.62943	6.29387	7.22099	6.65988	8.97729	10.7593	14.9979	18.2358	21.5191	16.901	25.5434	28.023	29.2718	31.5087
77	10.4718	12.6118	12.0299	8.50181	11.4521	13.5807	11.408	11.1767	13.9541	15.6561	16.4907	19.6528	19.303	22.2363	22.6646	26.2612	26.9713	30.5445	32.6741	34.4198	33.772	38.0045	39.9674	37.4156	37.5415	31.8864	32.8063	28.8475	28.4221	25.7968	24.4822	21.4371	17.7988	14.7044	11.1801	7.57525	8.14522	9.84231	9.66189	12.183	14.5911	18.4593	21.7282	25.0524	21.3482	29.989	32.7765	34.0668	36.8754
78	8.80316	11.2455	12.1173	8.52121	10.3089	13.4624	12.2506	9.77647	14.329	16.6952	17.7519	21.3434	21.5471	24.3608	25.2996	28.6906	30.0928	33.2457	35.6468	37.6273	37.3689	41.5939	43.4142	40.7567	40.6463	35.2017	35.6039	31.7698	31.0587	28.202	26.9046	23.6826	20.1582	16.7812	13.4122	9.66259	9.86464	11.829	12.3239	14.957	17.6768	21.2129	24.5431	27.8331	24.3541	32.8519	35.7245	36.6975	39.8131
79	11.0142	13.3807	13.8587	10.3242	12.9194	15.5383	14.2747	12.5709	16.7768	19.244	19.6949	23.3166	23.4944	26.1431	26.8605	30.0466	30.7451	33.8497	36.0593	37.6858	37.3588	41.2718	43.1754	41.0162	41.253	35.8322	36.8489	33.2756	32.759	30.0144	28.9785	25.8783	22.3918	19.0846	15.8805	12.124	12.5546	14.4647	14.7107	17.2718	19.4373	23.417	26.6707	29.8947	26.0465	34.629	37.3769	38.3689	41.0054
80	9.23391	11.6548	11.3586	8.42263	11.685	13.8555	12.2531	12.7528	16.1251	18.3584	17.2578	20.6729	20.5804	23.0119	23.3995	26.2851	26.6097	29.9212	31.9076	33.3157	32.7889	36.6343	38.6142	36.6125	37.0556	31.5615	33.0372	29.5526	29.4341	26.8689	26.3482	23.5585	20.2528	17.2214	14.7658	11.2511	12.8747	13.8418	13.333	15.7595	16.6791	21.3996	24.3117	27.3648	22.8416	31.5002	33.8647	34.951	37.0704
81	8.49904	11.2262	10.8416	8.70836	11.943	13.9196	11.9163	13.9364	17.0371	19.1724	16.9901	20.2398	19.6411	21.8636	22.0691	24.6346	25.0854	27.937	30.1091	31.6613	31.5933	35.3513	37.1561	35.147	35.4353	30.215	31.385	28.0831	28.162	25.8664	25.8057	23.3661	20.2258	17.574	15.6872	12.1995	14.3138	15.6611	14.4571	16.6371	16.166	21.3444	23.6764	26.7768	21.9079	30.3109	32.6473	33.5411	35.5209
82	6.89563	8.86726	7.40851	5.32849	8.28672	9.61424	6.9017	9.40652	11.6427	13.4841	11.6078	14.91	14.7334	17.024	17.4578	20.1555	21.4757	24.1737	26.6298	28.6097	28.8624	32.8912	34.5172	32.008	31.8936	26.7693	27.2492	23.7319	23.5071	20.9666	20.7603	17.9675	14.7817	11.8656	10.0676	6.47263	8.94413	10.7529	9.92168	11.7954	11.9927	16.3799	19.027	22.0879	17.5738	25.8073	28.3383	28.9572	31.5128
83	8.92442	10.1114	8.11941	8.31549	11.0152	10.6907	8.3022	13.7428	15.6638	17.6985	13.2985	15.9698	15.4226	16.5737	17.3171	17.8838	18.8757	20.6809	22.8833	24.3927	25.175	28.4887	29.9414	28.2109	28.4402	23.9642	24.8562	22.0042	23.0745	21.1552	21.9453	19.8289	17.4163	15.3271	14.6728	11.2891	14.1232	15.7764	14.2188	16.0825	14.1027	19.1331	20.4405	23.5019	18.5411	25.7719	27.5726	27.7339	29.1166
84	9.5294	9.49254	6.95263	7.21718	9.59486	8.38444	5.13439	11.3314	12.6048	14.3153	9.71023	12.244	11.9481	13.2457	14.4003	16.3037	16.7842	19.5001	21.6812	23.1648	23.2081	26.9825	28.7187	26.6671	27.0094	21.864	23.1172	19.9369	20.3148	17.7278	18.3682	16.1379	14.0442	12.1038	11.9695	9.00466	12.2836	13.5178	11.5079	13.0529	10.4656	15.6	16.8686	19.9483	14.9541	22.7823	24.8285	25.4949	27.226
85	6.41523	5.54384	3.27528	3.85816	5.97581	6.03148	3.73628	6.52639	8.25085	10.1108	8.53628	11.9365	12.2824	14.6184	15.9627	18.344	20.4207	22.5326	25.2096	27.3934	28.1454	32.0764	33.4864	30.9084	30.566	25.8083	25.5959	22.1973	21.7784	18.8097	17.9967	14.9644	11.7595	8.5949	7.0784	3.35066	6.26314	8.51853	7.60704	9.26141	9.73817	13.7271	16.5776	19.5617	15.7956	24.0459	26.8836	27.2338	30.1636
86	4.87399	6.19148	4.82444	4.95362	7.69888	8.03379	6.44009	11.0945	13.6377	15.8363	11.8004	15.1314	15.7343	17.0939	18.4866	20.3161	22.6135	24.4563	27.2023	29.3866	30.3575	34.1335	35.4621	33.0107	32.6319	28.091	27.5352	24.3152	24.3048	21.529	21.9136	19.2562	16.9594	14.2696	13.8495	10.238	13.1883	15.5115	14.7518	16.1975	15.1244	19.3459	20.9586	23.9472	19.7302	27.164	29.6623	29.4846	32.3192
87	7.24347	7.67588	5.7658	6.74672	9.48056	7.40811	7.32128	13.051	15.313	17.0167	11.9328	14.5524	14.4244	14.9415	16.3855	17.389	19.3898	20.8197	23.4908	25.5448	26.8131	30.3209	31.5298	29.3172	29.0253	24.8012	24.3159	21.4316	22.056	19.7221	20.9139	18.9369	17.2352	15.4607	15.7986	12.3897	15.4969	17.8549	16.5451	17.5954	15.0085	19.4865	20.0328	22.9461	18.2913	25.1012	27.2325	26.8936	29.1346
88	7.16966	5.05534	3.42482	5.71871	7.71546	4.35364	3.84806	10.354	11.7843	13.2801	8.14062	10.2403	10.4559	10.7707	12.6314	13.7251	16.0943	18.0198	20.9826	23.4899	24.999	28.7674	29.8099	27.062	26.3432	22.2384	20.8609	17.8599	18.1229	15.5316	16.7102	14.7755	13.5645	11.796	12.834	10.0174	13.2449	15.6935	14.6868	14.799	12.5556	16.1847	16.3293	18.9965	14.9938	21.318	23.6344	23.0141	25.897
89	8.79168	6.1043	4.8991	7.1881	8.74246	3.84482	6.64591	11.9098	13.3221	14.4138	9.44483	11.7787	13.162	12.4389	14.6634	14.5559	17.8168	19.6485	22.8566	25.6191	27.9303	31.3403	31.8904	29.1937	28.028	24.1269	21.8288	19.5342	19.0532	17.039	18.3216	16.5142	16.2219	14.2275	15.774	13.3078	16.1572	18.853	18.5228	18.0151	17.0721	19.3218	19.4078	21.2763	18.6864	23.4799	25.7223	24.0388	27.0304
90	11.5164	9.16626	7.5586	9.78817	11.5507	6.63409	8.59649	14.4861	15.8194	16.994	11.6881	13.7234	14.3325	12.9174	14.8854	14.0228	16.935	18.2266	21.259	23.752	26.1984	29.3016	29.8795	27.4983	26.5648	22.8017	21.0128	19.0294	18.812	17.7112	19.4003	18.2952	18.0488	16.3096	17.7508	15.2834	18.322	20.9177	20.1828	19.8331	17.955	20.74	20.3482	21.956	19.0769	23.4674	25.5155	23.7874	26.0583
91	12.4967	10.7419	8.73784	10.621	12.7058	8.24072	8.33151	15.2535	16.1369	17.1399	11.6742	13.0801	13.0286	12.3073	14.2396	14.4423	16.5951	18.0163	20.8649	23.0609	24.9393	28.1978	29.1056	26.8954	26.3777	22.6114	21.111	18.6885	18.931	17.2202	18.78	17.4095	16.7587	15.6137	16.7252	14.5638	17.8691	20.1715	18.6314	18.3582	15.9103	19.3535	19.0191	21.1083	17.5302	22.9694	24.9601	23.8672	26.162
92	12.7466	12.345	9.86829	10.4888	12.7091	10.5483	6.86832	13.8669	14.0168	14.9912	10.66	11.6754	8.99315	10.6223	10.8935	11.7354	13.7755	14.6974	17.2752	19.2769	21.0043	24.2626	25.2612	23.1401	22.8503	19.0981	18.6459	16.2572	16.8952	14.9124	15.8979	14.5312	12.5468	11.2061	12.1774	10.4382	13.6961	14.81	12.3646	12.9116	9.15884	14.0268	14.2409	17.2187	12.063	19.4563	21.6198	21.6728	23.3717
93	16.6691	16.3813	14.1403	15.3177	17.7595	14.4267	12.3698	19.6682	20.1794	21.0699	15.873	16.5595	13.6832	13.6111	13.4898	12.6096	13.8199	14.1413	16.3302	17.4779	19.1925	21.713	22.7242	21.5149	21.539	18.532	19.3178	17.2058	18.5451	18.1656	19.7263	20.0128	18.9656	18.0701	19.3145	17.326	20.6405	21.6763	19.08	19.9367	15.6115	20.3103	19.1859	21.0804	16.3849	21.5953	22.9774	22.5541	23.3753
94	17.9009	18.0339	15.3072	15.7075	17.8673	16.209	11.7399	18.221	18.0647	18.8712	14.8633	15.2576	9.49876	12.0258	10.3384	10.4482	10.1736	11.4326	13.3539	14.5021	15.4454	18.6307	20.0041	18.3572	18.8201	14.6531	16.5833	14.3929	16.1012	15.0716	16.3752	16.6227	14.8832	14.3407	15.3743	14.0055	17.0342	17.1431	14.0961	15.208	10.3141	15.3765	14.5017	16.9942	11.1996	17.9783	19.3852	19.905	20.2253
95	21.6041	21.8019	19.4542	20.1024	22.4752	19.8125	16.3674	23.482	23.3683	23.9565	19.4312	19.3109	14.3283	14.8473	13.3865	11.6255	11.7664	11.6558	13.7867	14.6196	15.2425	17.9456	19.6152	18.6326	18.9626	15.4773	17.4786	16.0127	17.8901	18.037	20.2453	20.9966	20.1311	19.6475	20.9946	19.8215	22.9648	23.2146	20.0185	20.9442	16.1285	20.9282	19.4301	21.0769	16.1446	20.396	21.1859	20.9487	21.1123
96	22.4719	22.0399	19.2103	20.013	22.0259	19.3134	14.8983	21.5353	20.3649	20.2508	16.8632	15.8229	8.57371	11.2111	8.30782	9.46287	7.23606	10.6974	12.0757	11.5299	11.7331	14.2397	16.1439	15.6602	16.9972	12.0268	14.3527	11.2402	13.8222	13.1238	14.8594	15.7635	15.0708	15.2685	16.8292	17.1803	19.8738	19.2992	15.4893	15.9829	11.0764	15.2765	13.4191	15.1597	9.86599	15.4853	16.4941	17.5821	17.9695
97	27.6447	28.2409	25.8445	26.2039	28.4956	26.3701	22.2866	28.9318	28.4331	28.7854	24.9765	24.3647	17.2598	19.4893	16.2942	15.8203	12.7243	13.0936	13.6414	11.639	12.2508	12.4016	15.5809	16.2882	17.8223	13.9236	19.1358	16.1503	20.5417	20.8621	23.1525	24.4208	23.6893	23.7284	25.0238	24.4502	27.2169	25.9119	22.4518	23.9274	18.9804	23.6381	21.8519	22.9088	18.1611	21.7051	20.6896	22.893	21.4981
98	28.5504	28.5257	25.5002	25.9587	28.0207	26.0013	20.9854	27.3073	26.0092	25.321	22.767	21.6407	13.2232	16.6757	12.6199	13.3871	8.7228	11.6037	11.5141	11.0116	9.75032	10.5503	14.4689	14.097	16.2159	10.518	15.4957	11.5843	16.3236	16.6609	18.7878	20.2381	19.7923	20.4091	21.8221	22.4556	24.8058	23.0495	19.2215	20.09	15.3489	19.184	17.0893	17.9246	13.3893	17.139	16.51	18.6335	17.88
99	32.301	32.9586	30.2394	30.4448	32.6655	31.0271	26.2375	32.3716	31.4364	30.9814	28.5521	27.5664	19.2311	22.6872	18.6658	18.9583	14.3	15.7563	15.2762	13.2564	11.9218	11.7053	16.4559	15.75	19.0806	14.2091	20.2053	16.7296	21.9286	22.6012	24.8119	26.2855	25.5446	26.0258	27.216	27.3234	29.6255	27.402	23.8952	25.2788	20.6147	24.756	22.9674	23.6779	19.2887	22.4801	20.8609	23.5579	22.0175
100	33.6554	33.5952	30.4191	30.7988	32.8224	30.6293	25.5775	31.6248	29.9452	28.3673	26.3446	25.3882	16.5134	20.4014	15.809	16.708	11.1746	13.3319	12.0968	10.4455	7.93785	9.52192	13.5033	11.6294	15.1642	10.0307	16.2106	12.1555	17.8783	18.8432	21.0288	22.8422	22.8291	23.8953	25.2826	26.3923	28.5406	25.8765	22.2036	22.9631	18.6899	21.3671	19.2808	19.2101	15.5555	17.8473	15.8711	18.8798	17.5466
101	36.7359	37.8481	35.1014	34.7846	37.1785	36.1569	30.9895	36.5737	35.4667	34.066	32.5559	31.9009	23.0446	27.2341	22.8514	23.6641	18.3351	20.1118	18.8954	16.317	13.2645	12.3513	18.1748	15.8401	21.1684	16.8241	23.1345	19.4351	25.1987	26.0964	28.1147	29.6669	28.8912	29.6856	30.7234	30.9758	32.9477	29.6606	26.6248	28.1619	23.9973	27.5205	25.8174	26.1509	22.2704	25.0127	22.7074	25.9723	24.266
102	40.7511	41.5639	38.7219	38.7372	40.9657	39.633	34.4504	40.2157	38.9863	37.5169	35.9841	35.2507	26.3757	30.3887	25.9087	26.2077	20.8605	21.5974	19.7578	16.4085	12.7705	10.5469	16.7744	14.8358	20.4859	17.8818	24.1204	21.4367	27.3104	28.7558	31.0834	32.8751	32.318	33.1714	34.239	34.6851	36.7125	33.4601	30.2109	31.6511	27.5139	30.8978	28.9295	28.9563	25.4246	26.79	23.5045	27.1753	24.687
103	39.6148	40.1182	37.3294	37.6576	39.8276	37.8746	33.0266	39.1381	37.5484	35.4399	33.7335	32.6999	23.8732	27.4849	22.7244	23.0752	17.4476	18.0585	15.7475	12.4815	8.52241	6.82054	12.6869	10.6229	16.1952	13.7629	19.9606	17.3882	23.2865	24.9742	27.3548	29.5403	30.0451	31.3585	32.7454	33.7902	35.8901	32.9183	29.363	30.157	26.1708	28.0604	25.4276	25.0097	21.6935	22.3898	19.0319	22.7483	20.3704
104	36.8447	37.1754	34.3286	34.7294	36.8624	34.8	29.9865	36.2863	34.9705	33.9718	31.5465	30.3927	21.7463	24.9361	20.4678	20.1544	15.2378	15.2618	13.8492	10.399	8.1201	5.99986	11.9122	11.5259	15.7566	12.6559	18.8595	16.6782	22.2148	23.7239	26.2676	28.239	28.3346	29.1974	30.5848	31.3	33.5242	31.1432	27.4819	28.4832	23.9782	27.1293	24.9299	24.7341	21.2116	22.3018	19.3778	22.6123	20.1275
105	34.2525	34.5575	31.7793	32.4395	34.4893	31.9218	27.4832	34.0835	32.7635	31.9579	29.1321	27.6546	19.4081	21.8587	17.5212	16.6673	12.0088	11.4585	10.3352	6.94961	6.43241	6.47592	9.96154	10.7216	13.0286	9.84023	15.7288	14.1555	19.2668	20.8906	23.7169	25.8149	26.3282	27.1441	28.7224	29.4475	31.8893	30.1632	26.3198	27.0279	22.3542	25.3619	22.9209	22.67	18.9065	19.6614	16.9818	19.884	17.3398
106	30.804	30.8819	28.1877	28.8231	30.9272	28.3709	23.7655	30.196	28.4659	27.188	24.5278	23.2098	14.6331	17.6373	13.0214	13.2446	7.8828	9.49684	8.34191	6.49409	3.85144	7.36839	9.87556	7.96971	11.0777	6.05518	12.2341	8.97684	14.6592	15.9594	18.4939	20.6492	21.4304	22.5316	24.1774	25.4932	27.7611	25.9267	21.9611	22.3123	17.8655	19.9177	17.4736	16.9246	13.4297	14.4911	11.7169	15.0187	13.2372
107	29.5116	29.4745	26.8921	27.6963	29.8114	26.6542	22.8594	29.9029	28.8462	28.666	24.7916	23.193	16.2718	17.0812	13.4738	11.538	8.8115	7.14399	7.83852	7.09214	7.82463	9.64016	11.5981	11.3462	12.4398	9.34805	13.4654	12.4703	16.0704	17.3022	20.31	22.3768	23.3588	23.8349	25.5636	25.8798	28.6897	28.0977	24.2149	24.6687	19.8218	23.0859	20.4163	20.3072	16.2765	17.3734	16.1355	17.7371	15.9883
108	25.8259	25.6518	22.8112	23.7269	25.6677	22.6495	18.5054	25.3766	24.1483	23.8861	20.2243	18.7796	11.6248	13.125	9.60833	8.95614	6.12443	7.78609	8.7967	9.12422	8.72527	12.1723	13.8952	12.6248	13.907	9.02788	12.8986	10.5026	13.7226	14.0679	16.6035	18.222	18.5997	19.0481	20.7941	21.3181	24.0715	23.5642	19.6899	19.9779	15.1645	18.5803	16.1061	16.7534	12.2208	15.3036	15.4319	16.6681	16.0227
109	24.4341	23.6085	21.1303	22.1414	24.2096	20.4577	17.2432	24.6205	23.7432	23.5305	19.1569	17.7225	12.5982	11.8125	9.58601	7.08747	7.40538	6.99845	9.12949	10.1753	11.5388	14.0687	15.0017	14.1326	14.6011	11.2711	12.5271	11.2866	13.2072	13.8361	16.5368	18.1678	19.2028	19.421	21.3366	21.3895	24.4532	24.8438	21.3516	21.3459	16.7718	19.4518	17.1543	17.3888	13.4054	15.6992	16.4429	16.0083	16.2371
110	20.5936	19.7988	17.446	18.5125	20.6923	16.9165	14.0533	21.4059	20.5001	20.4952	16.0841	15.0501	10.1573	9.86895	8.31069	7.29884	8.13328	9.21667	11.3097	12.7181	14.4678	17.4443	18.464	16.6824	16.8047	13.0071	13.9141	11.5771	13.5152	13.0469	15.1383	16.1786	16.3974	16.3314	18.121	18.1244	21.1734	21.6722	18.2761	18.2505	13.717	17.0688	15.1209	16.1974	11.8598	15.9301	17.2026	17.0235	17.8842
111	18.9067	17.3019	14.808	16.1084	17.9818	13.6921	11.0827	18.5853	17.7297	17.6514	12.7902	11.8394	8.97429	7.3474	8.15661	7.18662	9.35155	10.2295	12.8192	14.9607	17.141	20.3003	21.0798	18.8049	18.37	14.8004	13.6738	11.6751	12.1971	11.9178	13.7988	14.3621	14.8511	14.561	16.4424	16.3936	19.53	20.9742	18.117	17.2046	13.7404	15.9877	14.5706	15.6263	12.1402	16.2246	18.069	16.8209	18.3344
112	14.8998	13.1842	10.8045	12.0693	14.0046	9.84526	6.92944	14.2956	13.7199	14.1487	9.32153	9.51811	7.3016	7.64523	8.6541	9.26255	11.0545	12.6641	15.3462	17.6632	18.9538	22.7925	23.9402	21.2179	20.7678	16.3978	16.2035	13.1536	14.1845	12.3455	13.7184	12.7607	11.7912	10.864	12.3719	11.6633	14.86	16.4356	13.9291	13.3408	10.1174	13.7456	13.0906	15.5315	11.1745	17.0915	18.9095	18.8832	20.7067
113	14.822	12.3912	10.0541	11.8976	12.7737	7.95454	6.82046	13.6651	12.8944	12.8432	7.62787	7.41976	8.07657	6.89523	9.12696	8.88098	12.1326	13.9946	17.2869	20.2488	22.3374	25.977	26.4093	23.6674	22.3135	18.3981	16.0235	13.9011	13.4344	11.5032	12.8783	11.6438	12.0236	11.4063	13.2926	13.1934	16.073	18.2176	16.7316	14.9132	13.2165	14.3811	14.1385	15.734	13.4915	17.9509	20.2993	18.4944	21.2129
114	11.3881	8.48835	6.56756	8.43156	7.07038	3.85141	4.67788	8.18935	7.95478	8.48297	4.0657	6.74163	8.96484	9.10486	11.3452	12.1552	15.1193	17.339	20.6202	23.5733	25.7201	29.3978	29.8749	26.9554	25.661	21.6857	19.1912	16.5915	16.1743	13.5046	14.5021	11.5398	11.2513	9.09452	11.1147	10.3497	12.4871	15.0455	15.2446	13.6264	13.4493	14.7514	15.7023	17.6678	15.4147	20.1651	22.5487	21.0232	24.4429
115	15.0874	12.1424	10.4057	12.546	12.0898	7.29224	8.1196	13.246	12.57	11.8174	7.56655	7.48713	9.04947	7.85937	10.1008	7.74031	12.6283	14.0955	17.7903	20.8992	23.8272	27.0451	26.6568	24.1589	22.4914	18.6374	15.5122	14.0333	12.145	11.8781	12.7882	11.5039	12.7038	12.429	14.3676	14.2817	16.8051	19.1712	18.5407	16.3961	15.5689	15.6422	16.0611	16.6682	15.5676	17.8874	20.1334	17.3608	20.6168
116	15.8181	12.6122	11.5922	13.6806	11.7981	8.02988	10.3445	12.9451	11.8551	10.5679	8.144	7.01068	9.81305	9.07193	13.4892	12.3739	18.0513	20.0559	23.9811	27.3054	29.907	33.4937	32.6937	30.2864	28.1278	24.366	20.5243	18.8251	16.3845	14.023	12.9833	11.77	12.8344	12.6603	14.8901	15.393	17.2203	19.5617	19.8171	17.1548	17.4171	16.2078	17.1547	18.0633	18.2682	20.9562	23.7306	21.1709	25.3952
117	14.7596	11.7918	10.4325	11.3587	9.81119	6.30613	7.90268	9.83138	7.76858	6.50656	3.7803	3.32992	6.49871	8.40758	11.7901	13.1134	17.6301	20.665	24.0002	27.3851	29.3726	33.4034	33.2379	30.0998	28.1969	24.2471	20.6587	17.9075	16.175	12.3597	11.4844	8.51181	8.90582	8.19055	10.4435	11.2252	13.1745	15.3158	15.5298	12.7129	13.4025	12.5318	13.9074	15.6081	15.3231	19.2216	22.3099	20.6078	24.9561
118	15.6672	12.9064	10.691	12.4802	11.2157	7.72804	7.23411	11.4976	9.70106	8.58881	4.93925	3.47558	4.32931	3.87538	7.15472	8.65376	13.0436	16.2164	19.4964	22.9674	25.0018	29.0178	28.6169	25.4668	23.4476	19.5382	15.8554	13.0902	11.4473	7.79306	8.01847	6.6754	8.30619	8.70957	11.0351	11.9792	14.3541	16.4209	15.5349	12.9015	11.9888	10.7729	11.0641	11.9248	11.8173	14.8138	17.6743	15.765	20.0689
119	13.3669	11.4543	8.38356	10.1335	10.8781	7.63022	3.70473	10.7474	9.08353	8.701	4.10022	2.90278	3.32386	2.83968	5.36844	7.81729	11.0757	14.1752	17.3867	20.6494	22.2486	26.4765	26.7396	23.4019	21.8123	17.8339	14.9138	11.6137	10.5394	7.22037	8.16443	6.98312	7.67428	6.9415	8.82245	9.38213	12.1365	14.0773	12.0447	10.4451	8.33242	9.67695	9.44097	11.1141	9.4513	13.8536	16.6226	15.5498	19.3828
120	17.2476	14.9317	12.186	14.1215	14.2259	10.4403	7.81661	14.0634	12.4346	11.8579	7.28789	5.69854	5.60287	3.29662	5.49457	4.80896	9.15954	11.714	14.9674	18.0606	20.0198	23.927	24.3396	21.199	19.8345	15.8766	12.3922	10.1983	8.83924	7.39263	9.06644	9.2471	9.9711	9.5872	11.9698	12.9415	15.5871	17.4325	15.4805	13.2595	11.1956	11.8758	11.2364	12.1673	9.84792	13.757	15.9795	13.5569	17.3982
121	19.685	17.6712	14.7371	16.4547	17.1181	13.4412	9.97521	16.6705	14.9143	14.264	10.1201	8.10143	4.46885	2.9807	3.26164	2.90822	5.14817	7.77136	10.9689	14.1371	15.1148	19.3876	20.3509	17.1415	15.8266	11.8372	9.94228	6.88762	7.91519	7.18659	9.15178	9.90772	10.8842	10.8195	13.1864	14.4057	17.118	17.8331	14.4814	13.414	9.51452	11.5255	9.87692	10.7719	6.80382	11.2144	13.1392	12.3932	14.8952
122	21.0105	18.4397	16.2965	18.1558	18.765	13.8311	12.655	19.4291	18.14	17.2756	12.9084	10.9119	7.63701	5.44824	5.47807	3.27142	5.50408	6.50267	9.52682	12.2958	14.7951	18.1923	18.6286	15.8198	14.8942	11.1014	9.99672	7.94194	8.3198	9.34969	11.3282	12.454	13.8937	14.0038	16.3444	17.3135	20.1608	21.2344	18.0811	16.791	13.0414	14.4536	12.6407	13.0285	9.83355	12.6723	14.4098	13.0004	14.9411
123	24.8862	23.0491	20.2396	21.705	23.0929	18.9954	15.5299	22.3888	20.5961	19.9147	16.2603	14.1129	7.96263	7.80469	4.44875	2.87246	3.21831	2.90256	5.50091	8.26339	10.9747	14.3067	14.5755	11.7627	10.9851	7.38364	7.93228	6.97152	8.88209	8.86851	11.4984	13.2978	14.8174	15.4602	17.6448	19.0516	21.6999	21.7749	18.0502	17.3667	12.7456	14.5936	12.0959	12.1853	8.23599	11.1871	12.2192	11.3233	11.8212
124	27.1921	25.8318	23.0914	24.374	26.1668	22.0547	18.7941	25.9568	24.5055	23.9535	19.9069	17.9116	12.4439	11.477	8.66	5.53747	5.29728	3.18262	5.39512	6.47151	8.7557	11.6255	12.453	10.4459	10.6775	7.84683	9.36019	9.17775	11.103	12.3094	15.3652	17.4465	19.2435	19.7609	21.9051	22.8345	25.6822	25.9092	22.2149	21.7499	17.1942	19.0366	16.4792	16.0175	12.4838	13.4842	13.3801	13.232	12.7972
125	29.6178	28.6011	25.5381	26.6758	28.3979	25.0466	20.7856	27.5861	25.8217	24.8143	21.5283	19.6963	12.1441	13.4327	9.13173	7.86724	3.82083	2.91031	3.31145	2.89683	4.65586	7.65049	8.44787	6.8331	7.62385	5.011	9.14003	7.39026	11.3133	12.5628	15.5684	17.8411	19.3055	20.283	22.2386	23.6382	26.1623	25.4453	21.392	21.1825	16.4767	18.5287	15.7245	15.2953	11.3555	12.4546	11.6085	13.3376	11.4415
126	32.387	31.6204	28.868	29.9139	31.8456	28.2554	24.5488	31.545	30.0521	29.3376	25.8573	23.8323	16.7558	17.4032	13.4782	11.3133	7.58713	5.57198	5.51161	3.31512	5.27568	5.8603	5.22319	7.24513	7.5704	7.1532	11.3351	11.1305	14.896	16.6515	19.8833	22.3026	23.9166	24.7694	26.7079	27.7152	30.4039	29.7926	25.7793	25.7598	21.1229	23.2291	20.3935	19.6612	15.9135	15.9002	14.0093	15.9124	13.6247
127	35.3676	34.7284	31.8993	32.9004	34.8122	31.4165	27.4577	34.3175	32.6941	31.6723	28.4349	26.5609	18.9553	20.1488	15.8838	14.1074	9.37124	7.98083	6.37726	2.76145	3.62957	3.0054	5.16895	6.99869	9.16718	7.02419	12.2212	12.097	16.5808	18.6462	21.8724	24.437	26.0914	27.1253	29.0196	30.2326	32.776	31.6968	27.6546	27.7164	23.0783	25.0063	22.1958	21.1778	17.6091	17.0571	14.1917	16.8363	13.9106
128	37.5107	37.2104	34.443	35.2966	37.2971	34.1868	30.1042	36.8946	35.3926	34.4046	31.3318	29.5948	21.6753	23.329	18.9822	17.4702	12.6179	11.4382	9.58343	5.49781	5.48632	3.31276	7.11583	9.21754	11.3449	9.63527	15.3073	14.913	19.7797	21.818	24.9451	27.4368	28.759	29.7558	31.5298	32.5585	35.059	33.6074	29.6474	29.9963	25.413	27.5964	24.9058	23.9677	20.4231	20.0438	16.7949	19.7739	16.6627
129	40.5423	40.4693	37.7476	38.5069	40.5569	37.6224	33.4683	40.1911	38.7378	37.7068	34.7625	33.1207	25.0089	26.9197	22.5063	21.1082	16.1124	15.0014	12.8331	8.64385	7.49377	3.01038	8.6869	10.4167	13.5909	12.5648	18.3996	18.0705	23.1289	25.2446	28.327	30.8244	32.0181	33.0323	34.7296	35.6913	38.1316	36.3604	32.4873	33.0079	28.449	30.7272	28.1141	27.1028	23.5479	23.1701	19.5159	22.7441	19.4052
130	37.0234	36.8198	33.7832	34.4306	36.4138	33.9032	29.0637	35.4921	33.7887	32.3993	29.8128	28.4587	19.8938	22.7419	18.0603	17.6451	12.2326	12.3101	10.2862	7.00289	4.06705	2.80599	8.28883	7.5417	11.7372	8.94614	15.1254	13.4053	19.0281	20.773	23.5064	25.8044	26.644	27.7978	29.4039	30.6715	32.9097	30.731	26.8624	27.3593	22.997	25.1135	22.678	21.8719	18.3611	18.9147	15.6168	18.9357	16.2066
131	43.6294	43.576	40.5581	41.1392	43.1532	40.7122	35.8229	42.1552	40.3673	38.4996	36.3017	34.9711	26.3744	29.2647	24.5084	24.0708	18.3643	18.5137	15.8201	12.3325	8.52313	5.58733	11.507	9.38339	15.5325	14.0435	20.1777	18.8586	24.496	26.6758	29.3001	31.823	32.9289	34.2376	35.7933	37.1265	39.2953	36.6656	32.9215	33.4791	29.3331	30.8142	27.838	26.9262	23.589	23.3236	19.2322	23.0919	20.0976
132	46.8126	46.5959	43.4827	44.1094	46.0667	43.4832	38.5646	44.8283	42.717	39.9178	38.2809	37.0279	28.584	31.4053	26.6978	26.1699	20.3731	20.6382	17.5288	14.3368	10.2798	7.64047	11.8262	9.80905	15.6371	15.4726	21.1235	20.2295	25.678	28.003	30.5164	33.1329	34.6103	36.3039	37.8664	39.6343	41.7489	38.6859	35.0204	35.2324	31.1556	32.0743	28.8045	27.8404	24.4601	23.9902	19.7489	23.6704	20.694
133	47.0496	46.9663	43.7124	44.0965	46.0733	43.5071	38.6351	44.4753	42.3789	39.534	38.2916	37.2662	28.5671	32.028	27.3358	27.5396	21.7818	22.5411	19.4592	16.5291	12.1214	10.1187	14.7983	11.6851	18.0715	17.0447	22.7808	21.1574	26.8817	28.8749	31.1908	33.5485	34.4289	35.9942	37.3565	38.9265	40.8431	37.3014	33.8717	34.456	30.782	31.9783	28.929	28.4267	25.2864	25.292	21.4735	25.3866	22.4002
134	44.0636	43.912	40.6107	40.9759	42.9312	40.3172	35.4752	41.2417	39.1195	36.3332	35.0692	34.0612	25.3806	28.9127	24.2707	24.6592	18.9715	20.4126	17.7186	15.3997	10.6045	10.2909	14.9496	10.4984	17.0158	14.7145	20.329	18.015	23.745	25.6563	27.8827	30.2243	31.1684	32.7278	34.0998	35.7048	37.663	34.2925	30.7679	31.2796	27.505	28.6622	25.5478	25.0482	21.9455	22.0643	18.4729	22.3587	20.0317
135	41.5268	41.0136	37.6578	38.049	39.9022	36.9744	32.3028	37.8771	35.5359	32.4129	31.3611	30.4758	21.8672	25.6218	21.0764	21.929	16.4842	18.5208	16.297	14.55	9.82233	10.9714	15.0599	10.2934	16.2649	12.9213	18.199	14.9868	20.7333	22.3603	24.347	26.5446	27.3623	29.063	30.4486	32.2314	34.224	30.8451	27.2933	27.5656	23.7873	24.7615	21.6593	21.378	18.3827	18.9683	15.9794	19.7258	18.0363
136	38.0749	37.8213	34.5339	34.975	36.92	34.342	29.4435	35.3826	33.3723	31.0825	29.3836	28.1765	19.5573	22.7058	17.9778	18.1694	12.4678	13.9668	11.6402	9.73082	5.15439	7.48601	10.9445	6.90351	12.3406	8.75601	14.7094	12.1263	17.9815	19.8386	22.3509	24.7611	25.6693	27.077	28.5243	30.0493	32.1072	29.1948	25.4786	25.9618	21.9827	23.6148	20.9422	20.0813	16.6905	16.9204	13.3478	17.2069	15.0519
137	42.0106	41.4312	38.1464	38.7748	40.6236	37.6657	32.9136	38.9448	36.6806	34.0545	32.2588	31.0158	22.5246	25.214	20.6008	19.8945	14.1081	14.5886	11.4422	8.79208	4.4133	4.13048	7.93052	4.01611	10.3025	9.01539	14.7893	14.1663	19.5025	21.959	24.7414	27.2691	28.6414	30.2921	31.8924	33.6667	35.8389	33.0214	29.2494	29.3753	25.1904	26.2458	23.1297	22.2004	18.8952	18.4168	14.0762	17.8759	14.6856
138	44.303	43.6264	40.3062	40.8962	42.6816	39.5565	34.9509	40.6414	38.0547	34.5901	33.523	32.4825	24.2256	27.3846	22.8261	22.9655	17.2902	18.645	15.8583	13.7693	9.15853	9.37535	13.2356	8.14199	14.6587	12.6906	17.9843	16.1383	21.5714	23.6007	25.6748	28.1427	29.6117	31.5256	33.0279	35.0385	37.1204	33.8358	30.2587	30.192	26.2825	26.7169	23.2499	22.5592	19.1878	19.3219	15.777	19.6306	17.4323
139	40.9975	39.8535	36.5061	37.0694	38.4392	34.9961	30.8135	36.3513	33.4656	29.848	28.5269	27.3166	19.6389	22.2274	18.1243	18.5327	13.557	15.5722	13.2621	12.3742	8.74807	10.865	12.8658	7.02868	12.0236	9.59199	13.1808	11.0037	15.8538	17.9721	20.0183	22.676	24.6624	26.7978	28.6621	30.9621	33.2239	30.4784	26.7532	26.1002	21.9139	21.7911	18.0913	16.9035	13.3123	13.2891	9.98788	13.7115	12.288
140	42.0196	41.4949	38.0962	38.1835	40.0475	37.0667	32.6137	37.6473	35.1421	31.3879	31.1321	30.5717	22.1769	26.3347	21.9925	23.0226	17.7944	20.0233	17.882	16.5721	12.1446	13.5848	17.1108	11.5624	17.404	14.2944	18.918	15.6692	21.1094	22.7112	24.4464	26.3617	26.8334	28.647	29.8328	31.7018	33.4664	29.4696	26.3082	26.6262	23.3092	23.9455	20.7955	21.0729	18.0845	18.8432	16.0547	19.7327	18.3678
141	37.1431	36.7051	33.315	33.384	35.2903	32.4855	27.9309	32.9811	30.6686	27.3456	26.9352	26.4866	17.8837	22.5514	18.3043	20.2731	14.9817	18.493	16.6239	15.7271	11.4896	13.7823	17.3106	12.6356	17.8502	13.1788	17.5539	13.6034	18.8045	19.5678	21.006	22.6789	22.638	24.2443	25.3745	27.0707	28.8786	25.1219	21.7505	22.2256	18.9242	20.1121	17.125	17.5278	14.8298	16.5489	14.6704	18.2256	17.93
142	36.8969	36.4169	33.0066	32.7739	34.6248	31.6332	27.4363	31.9766	29.3615	25.3291	25.5726	25.3437	17.2686	22.0082	18.2105	20.6108	15.8534	19.9358	18.5362	19.0029	15.3745	17.8869	21.0077	15.7519	19.698	14.9555	18.0782	13.7644	18.2943	18.5858	19.6936	20.9985	21.0879	22.9172	23.9524	25.8864	27.5687	23.6223	20.4383	20.5428	17.2951	18.1645	15.2865	16.2923	13.4872	16.2752	15.3426	18.7385	19.0762
143	34.5042	33.4362	30.1033	29.8096	30.8326	27.4519	24.1879	28.0643	24.8334	19.8546	20.16	19.7695	13.686	17.0317	14.4155	16.8026	14.0234	17.6922	17.0677	18.2373	15.8322	19.7704	20.9715	16.2465	17.2177	13.1739	13.7545	10.5987	11.882	12.4915	12.5982	14.4542	15.7907	18.2331	19.8624	22.5554	24.5745	21.283	18.3849	16.6581	13.1125	12.2696	8.44051	8.46528	7.24927	9.47982	10.0513	13.2719	15.2241
144	33.3981	33.1176	29.7331	29.2118	31.1814	28.3821	24.2909	28.3772	25.9055	21.8706	22.6513	22.8125	15.0062	20.3697	17.0141	20.0865	15.5085	20.2808	19.2139	20.0387	16.6954	20.4455	22.9469	18.4188	21.0237	15.8608	18.4027	14.0648	17.5219	17.4627	17.6595	18.5952	18.0241	19.6368	20.4026	22.1566	23.498	19.4398	16.4256	16.7396	13.836	15.045	12.905	14.5017	11.9415	15.5763	15.6986	18.8698	19.8709
145	29.4558	29.3043	25.9402	25.5749	27.5812	25.1729	20.7447	25.1544	23.1279	19.6971	20.3095	20.4865	12.3471	18.134	14.7427	18.0093	13.762	18.8043	18.474	19.5695	16.8137	21.171	23.4472	19.6836	21.3648	15.5483	18.4208	13.4533	16.7972	16.0321	16.5639	17.0328	15.8213	17.0244	17.7526	19.0266	19.987	15.796	13.0509	14.0009	11.5414	13.5121	12.284	14.151	10.3252	15.6592	16.647	19.4776	20.6202
146	29.4383	29.7056	26.4493	25.6699	27.7298	25.9162	21.6771	25.3065	23.62	20.793	21.6894	22.3399	14.9068	20.9048	17.6535	21.2512	17.3708	22.3966	21.5333	22.3134	18.9433	22.4977	25.3008	21.2463	24.191	18.5496	21.9459	16.969	20.3541	19.5244	19.5693	19.5035	17.2645	18.0315	17.8875	18.8861	19.7772	15.6221	13.04	14.538	12.4741	15.0943	15.2358	17.2688	13.6522	19.1295	20.0579	22.9443	23.8399
147	28.6701	29.3054	26.1571	25.0105	27.157	25.7427	21.6307	24.6397	23.2933	20.5786	22.0241	23.0007	16.2384	22.2393	19.1812	23.0133	19.5878	24.6222	24.4416	25.4771	22.5449	26.1906	29.0969	25.442	27.609	21.7096	24.6407	19.709	22.4568	21.2288	20.8287	20.4587	17.7047	18.184	17.1017	17.7677	18.0625	13.8864	12.3387	13.9883	12.7968	15.5684	16.506	18.7347	15.1574	21.5396	22.8763	25.7497	27.017
148	25.1729	26.2584	23.278	21.7966	24.2727	23.6184	19.4484	22.6276	21.9399	20.7298	21.438	22.3586	14.6138	20.4079	17.2426	20.4963	16.1776	21.1756	20.7418	21.4359	18.4792	21.9691	24.9523	21.7181	24.2024	18.3157	21.991	17.0084	20.7579	19.5923	20.2372	20.1502	17.7156	17.5156	16.0336	15.8669	16.8203	13.3272	11.4883	13.703	11.9631	16.0563	16.4704	18.2665	13.7456	20.0998	20.9998	23.6555	24.2806
149	24.4026	25.974	23.3075	21.7758	24.5066	24.3521	20.0783	23.701	23.4263	22.8387	22.9808	23.6289	17.2902	22.3893	20.0689	23.0398	19.5585	23.9003	24.1384	24.6289	22.5841	25.4595	28.7632	26.8882	28.6544	22.7368	26.3331	21.6867	24.6882	23.2176	23.485	22.7978	19.5652	19.3136	17.7717	17.1233	18.2534	15.2187	13.5082	15.7334	13.6579	18.1927	19.5814	21.9522	17.0762	24.5907	26.0069	28.4235	29.2649
150	20.9578	22.3733	19.7805	18.7223	21.389	21.2658	16.7121	21.1958	21.012	21.0578	19.8845	20.4514	14.0704	18.9481	16.7449	19.6873	16.7814	21.2544	21.8377	22.9291	21.1271	24.9493	27.4364	25.5037	26.5231	20.6012	23.5763	19.2481	21.81	20.3559	21.1013	20.2085	17.1114	16.6467	16.0807	15.5773	17.4843	14.6948	12.101	14.3115	10.9726	16.3577	17.4368	20.0156	14.483	22.3823	23.917	25.9921	26.856
151	20.5167	22.7214	20.505	19.239	22.2203	22.9193	18.6077	22.8813	23.6437	24.6798	22.1655	23.3705	18.1712	21.7815	20.3035	21.9965	19.7952	23.1361	24.0937	24.6247	23.5968	26.3994	29.1955	28.0177	29.2964	23.7749	27.0012	23.1758	25.798	24.5042	25.5084	24.3993	21.2315	20.3895	19.2595	17.8698	19.7815	17.7074	15.7897	17.9164	15.1277	20.7632	21.9662	24.6383	18.964	26.7947	28.1826	29.9816	30.3655
152	15.7562	18.0117	16.1836	14.9078	17.9319	19.0943	15.052	19.2354	19.9598	21.0737	18.6113	20.0784	15.782	19.2084	18.073	20.4097	18.8888	22.5775	23.8027	24.9629	24.0484	27.7715	29.8753	28.1511	28.9907	23.4312	25.8582	22.255	23.8337	22.3176	22.923	21.466	18.3666	17.1021	16.1898	14.3447	16.5744	15.5227	13.6476	15.4976	12.6416	18.554	19.8658	22.7985	17.0938	25.2892	27.0431	28.6691	29.547
153	17.9804	20.3846	19.1551	18.3747	21.3682	21.9224	18.7784	22.9845	24.3203	25.7324	22.8308	24.5872	20.5961	23.4635	22.592	23.8647	22.4684	25.1835	26.6096	26.7191	26.0928	27.7107	31.069	30.5987	31.9863	26.7183	29.632	26.2027	28.2803	26.9513	27.8578	26.4724	23.483	22.0843	20.9839	18.6776	21.0226	20.3528	18.6393	20.5387	17.878	23.8001	24.9417	27.8583	22.0218	29.8735	31.3582	32.7592	33.1589
154	16.7121	19.3822	18.9818	18.1368	21.141	22.1344	19.4163	23.7135	25.6699	27.3707	24.0739	26.2437	23.1523	25.3833	24.9412	25.9226	24.998	27.3194	28.8998	29.2392	29.1485	31.4262	33.8499	33.2271	34.2615	29.3516	32.0731	28.963	30.7169	29.4076	30.2467	28.7194	25.8119	24.1785	22.961	20.1685	22.5922	22.5935	20.9049	22.9106	20.5352	26.4234	27.6145	30.5944	24.8037	32.5953	34.115	35.3245	35.6773
155	17.9279	20.374	19.5559	19.3819	22.1743	22.5255	20.0855	24.9756	26.8672	28.6708	24.7293	26.753	23.7142	25.1696	24.45	24.1668	23.2846	24.1987	25.7481	25.43	25.9824	27.4085	29.8041	29.7731	30.8445	26.7871	30.03	27.6445	30.1711	29.3836	30.5553	29.6607	27.0908	25.4739	24.7866	21.7477	24.4644	24.9191	23.1022	24.9736	22.1156	27.9505	28.5979	31.4538	25.5269	32.1305	32.8362	33.5844	33.3687
156	14.6742	17.1261	17.6836	18.3407	20.7767	21.8025	20.9934	23.5489	27.7499	30.1608	26.2815	28.4114	25.9483	27.0937	27.0004	26.9612	26.8436	28.0772	29.8793	30.1433	30.666	32.6496	34.6892	34.3012	35.1494	31.0368	33.5581	31.185	32.8175	31.5793	32.7795	31.6798	29.2669	27.5734	26.92	23.7215	26.2618	27.3066	25.5256	27.3904	24.553	30.3079	30.9191	33.861	28.076	35.1572	36.4016	36.7551	37.1549
157	20.5016	22.8009	22.3355	22.7535	25.4708	25.2503	23.6309	28.7667	30.9819	32.92	28.4098	30.4052	27.7595	28.3474	28.0126	27.2	27.2321	27.4571	29.3098	29.075	30.1508	31.4449	33.3374	33.4875	34.0104	30.8624	33.4439	31.6358	33.3923	32.8548	34.2744	33.768	31.5293	29.906	29.4715	26.2788	29.1415	30.0064	28.1735	29.9764	26.8866	32.6073	32.9393	35.4317	29.9456	35.8873	36.7988	36.8684	36.9796
158	19.7873	21.5524	20.1294	20.9965	23.7744	22.192	20.7763	26.901	28.4621	30.0048	25.0697	26.5189	23.7846	24.0453	23.8469	22.8117	23.2855	23.3878	25.4156	25.2915	26.5933	27.451	29.3592	29.8383	30.2064	27.186	29.1981	27.356	28.9534	28.6036	30.1237	29.9515	28.291	26.9117	27.3601	24.382	27.5648	28.6853	26.6026	28.0386	24.1564	29.5535	29.1639	31.4011	26.2248	31.7333	32.8343	32.544	32.9021
159	16.0701	17.8025	16.4706	17.3528	20.1303	18.7357	17.4965	23.4748	25.2749	26.9714	22.0458	23.8691	21.8731	22.1737	22.6168	21.9452	22.9451	23.614	25.7585	26.6452	27.6765	30.0921	31.4078	30.6311	30.9443	27.4752	28.6576	26.5021	27.8671	26.9046	28.399	27.5847	25.9139	24.3019	24.4948	21.3338	24.5164	26.0358	24.0592	25.538	22.102	27.398	27.3758	29.8833	24.7298	30.8854	32.268	31.8886	32.7864
160	16.0675	18.0335	16.6121	17.143	19.908	19.0376	17.1396	22.8466	24.5184	26.2832	21.6717	23.4905	20.9759	21.8399	21.9537	21.73	22.0898	23.3375	25.3342	26.1905	26.6377	29.3247	30.9215	30.0888	30.6799	26.6222	28.4839	26.0763	27.7134	26.4248	27.7553	26.8431	24.6097	23.0428	22.8917	19.8589	22.8683	23.7366	21.7554	23.3981	20.0738	25.7248	26.0638	28.9371	23.2372	30.2028	31.5477	31.6259	32.3436
161	13.9705	16.3215	14.7994	14.6954	17.3706	17.4103	14.5933	19.7447	21.3642	23.112	19.0805	21.0875	18.5459	20.1332	19.4961	19.7379	19.0187	20.7882	22.4205	23.0145	23.1517	25.9466	27.7531	26.8984	27.8085	23.2901	25.9723	23.3114	25.332	24.3706	25.4387	24.0837	21.5648	19.8938	19.4295	16.4177	19.2905	19.7136	17.955	19.8675	16.9124	22.6181	23.3015	26.2588	20.4738	27.4258	28.5686	29.2712	29.4943
162	18.8775	21.0477	19.3557	19.1877	21.8981	21.6951	18.5205	23.8932	25.0069	26.2977	22.7059	24.1455	19.4051	21.9565	20.6407	21.4073	19.7926	22.0914	23.3596	23.3398	23.2758	23.8696	27.3989	27.4553	28.671	23.6909	26.9934	23.7662	26.3948	25.3533	26.5522	25.994	23.4203	22.2615	21.8426	19.6064	22.1674	21.509	19.4097	21.2533	17.835	23.74	24.1011	26.8901	20.8751	28.0455	29.1893	30.3522	30.3444
163	17.6562	19.1402	16.8761	16.5567	19.1143	18.7593	14.6556	20.1519	20.7883	21.974	18.4246	19.5783	15.1687	17.7093	16.7788	17.9999	16.2725	19.5268	20.5385	20.493	19.8549	22.0952	24.9742	24.2786	25.7226	20.3621	23.5006	19.8536	22.523	21.2923	22.3178	21.4708	18.9124	17.7712	17.9497	15.7279	18.5277	18.2661	15.7725	17.4817	13.5898	19.4313	19.8019	22.519	16.5149	23.8813	25.131	26.5885	26.8827
164	22.9638	24.8369	22.5622	21.8209	24.5723	24.598	20.2033	25.2159	25.5911	26.4602	23.6257	24.3813	18.3563	21.9124	19.8633	21.1582	18.4991	21.4061	22.1429	21.1468	20.4004	21.2744	25.1475	25.0986	26.8908	21.5757	25.7714	21.6781	25.3445	24.3125	25.5838	25.2795	22.5936	21.8681	21.4883	20.2528	22.4391	20.1572	17.8545	20.0196	16.5411	22.0901	22.5718	25.0524	19.1902	26.1741	26.9143	28.7507	28.677
165	23.6157	24.4851	21.6048	21.3551	23.6988	22.4667	17.3218	22.9187	22.0001	21.7691	19.7723	19.333	11.5708	16.0888	13.1396	15.2927	11.753	16	16.4192	17.434	15.7437	19.7554	22.0048	20.083	21.188	15.3763	18.7812	14.5444	18.0963	17.1022	18.4798	18.7429	16.7106	16.8001	17.6984	17.6348	19.816	17.7221	14.2169	15.8402	11.1663	16.0742	15.5372	17.8371	11.9869	18.7184	19.7499	21.5285	21.8943
166	28.2069	29.5876	26.7952	25.9384	28.4021	27.5649	22.7896	27.2932	26.4632	25.3616	24.8944	25.0558	17.1898	22.475	19.3073	21.6533	17.1518	21.1394	20.8434	20.6393	18.2875	20.1122	24.3196	22.114	24.9341	18.9951	23.6405	18.8933	23.4952	22.4727	23.6887	23.5316	21.1361	21.3333	21.2351	21.3049	22.8332	19.3816	16.7048	18.8878	15.3512	19.7382	20.0006	21.9619	16.8375	23.1949	23.4975	25.9909	25.9499
167	28.2933	28.0544	24.697	24.6685	26.5977	24.342	19.5951	24.6404	22.8321	20.7363	19.8972	19.7555	11.1717	16.731	13.076	16.1295	11.565	16.6157	16.2833	17.355	14.8171	18.49	21.4227	18.564	19.9141	13.8973	17.2925	12.371	16.4771	15.5354	16.8192	17.2234	15.8299	16.769	17.7232	18.7872	20.6961	17.4723	13.8686	14.9047	11.1165	14.233	13.3858	14.9231	10.2068	15.868	16.7469	19.1582	19.854
168	32.4668	33.1713	29.9957	29.3827	31.6303	30.2302	25.47	29.9764	28.6165	26.4914	26.4223	26.5757	18.2056	23.7401	20.03	22.6415	17.6346	21.8938	21.1103	20.914	17.971	20.2465	24.0565	20.4091	24.4241	18.6018	23.2842	18.3158	23.273	22.5385	23.7709	24.0398	22.2476	22.9552	23.2629	23.7866	25.174	21.2967	18.5128	20.2795	17.0656	20.3987	19.601	21.3818	17.2367	22.2232	21.8803	24.9514	24.9414
169	31.8921	31.7797	28.4338	28.4618	30.4232	28.1398	23.342	28.5277	26.5402	23.8408	23.3414	23.1204	14.3216	19.5005	15.3278	17.7694	12.4872	16.8779	15.9096	15.9994	12.8367	15.9883	19.0953	15.7815	19.0148	13.1996	17.6961	12.7266	17.9173	17.684	19.1047	19.9625	19.0898	20.321	21.2904	22.5856	24.384	20.7243	17.3173	18.2185	14.861	17.1529	15.3627	16.5678	12.5706	16.9132	16.6332	19.5	19.4755
170	37.5629	37.5758	34.2341	33.7882	35.8628	33.5756	29.1197	33.1436	31.0197	27.0889	28.4034	28.5086	20.1635	25.5105	21.5949	23.9672	18.7691	22.5611	20.9181	20.5339	16.4543	18.7614	22.27	17.3547	22.246	17.4234	21.6989	17.2713	22.4683	22.6912	23.9238	24.7785	23.731	25.0842	25.393	26.7524	27.3494	22.9877	20.6554	21.3349	19.2022	20.8745	19.4371	20.6736	17.5929	20.5489	19.1349	22.6045	22.3671
171	40.9818	40.9128	37.5528	37.258	39.2519	36.7929	32.3418	36.8091	34.6137	30.9049	31.3794	31.3003	22.9136	27.878	23.5452	25.3299	19.8416	22.9601	21.0962	19.8519	15.4028	16.9538	21.0563	16.4559	22.1338	17.7256	23.0347	18.7253	24.3725	24.9501	26.1897	27.3038	26.8449	28.3651	29.1454	30.6089	31.7692	27.5776	24.7713	25.5496	22.7756	24.1058	21.7342	22.9104	19.8822	22.6461	20.7229	24.2055	23.2766
172	43.7499	43.4609	40.0691	39.8566	41.8534	39.0299	34.6682	39.2462	36.8011	32.7518	33.1664	32.9161	24.647	29.1214	25.1041	26.7117	21.8065	24.5029	22.5322	21.4746	17.1853	18.4568	21.8213	16.0205	21.4873	18.8256	22.3022	19.2342	24.2375	25.2714	26.6222	28.3464	28.6639	30.4157	31.3455	33.1003	34.4159	30.2593	27.3592	27.6786	24.7172	25.7255	22.4562	22.8671	20.1682	21.4058	18.9887	22.559	21.7335
173	46.7579	46.5668	43.1829	42.8065	44.8475	42.0601	37.8031	42.103	39.6309	35.2986	36.1267	36.0112	27.9156	32.593	28.5996	30.5001	25.3968	28.4039	26.4765	25.3003	20.7515	21.9059	25.8591	20.4634	26.3705	22.8161	26.9001	23.2333	28.3341	28.9886	30.0931	31.5055	31.544	33.3172	34.1233	35.8661	36.8761	32.5998	29.9591	30.0868	27.3872	28.4236	25.5793	26.468	24.0512	25.8538	23.7875	27.3848	26.7513
174	44.9373	45.1857	41.8651	41.429	43.4386	41.2405	36.81	41.0243	38.9489	35.0552	35.9823	36.0418	27.6651	32.6834	28.5362	30.5339	25.136	28.3423	26.4327	25.0808	20.4681	21.5224	25.8531	21.0374	27.0198	22.9786	27.9058	23.7437	29.1973	29.645	30.7471	31.9578	31.3866	32.8356	33.4488	34.6905	35.5142	31.1931	28.7311	29.4609	27.1084	28.5127	26.1271	27.2608	24.623	27.1691	25.2332	28.7959	28.0134
175	41.7857	42.1073	38.7991	38.3634	40.3949	38.3238	33.8189	38.1155	36.1585	32.6487	33.3032	33.3705	24.9695	30.2342	26.178	28.4561	23.0713	26.7066	25.0224	24.025	19.7275	21.0637	25.4521	20.8669	26.4286	21.6785	26.5719	22.0526	27.4339	27.5127	28.6574	29.5924	28.7561	30.0873	30.6976	31.7951	32.7442	28.4841	25.9265	27.035	24.5582	26.1243	24.1546	25.5133	22.3604	25.6017	24.1308	27.605	27.1165
176	38.9061	39.5778	36.3449	35.5763	37.7843	36.1625	31.6607	35.6773	34.03	30.9146	31.7219	32.022	23.766	28.9097	24.6206	26.6162	21.0439	24.2794	22.712	21.2442	17.0895	17.7605	22.6858	18.8145	24.4499	19.6431	25.3178	20.6676	26.32	26.6394	28.0914	28.6679	27.2217	28.254	28.325	29.2567	30.0083	25.7854	23.4701	24.8968	22.648	24.8561	23.6141	25.2873	21.7156	25.0674	23.3669	26.7242	25.8636
177	36.0202	36.5146	33.2946	33.0667	35.1783	33.4224	28.5457	33.5507	31.9545	29.5985	29.1257	28.9041	20.1278	25.2628	21.0004	22.6094	16.9444	19.6896	18.1002	16.4677	12.5151	12.9817	17.9788	14.4661	19.9751	15.1891	21.165	16.8597	22.6968	23.4494	25.019	26.0172	24.9579	25.9675	26.7839	27.5199	29.1995	25.3616	22.2968	23.7113	20.2352	23.0963	21.4391	22.5068	18.5879	21.7949	19.7398	23.0901	21.8564
178	34.271	35.4784	32.5823	31.7387	34.2339	33.2721	28.212	33.1131	32.1542	30.5763	29.5847	29.226	20.4284	25.2047	21.0108	22.4929	17.1001	19.7356	18.6085	16.8449	13.7834	14.4521	19.3427	16.8686	21.3973	16.2944	22.4338	18.0624	23.7352	24.1132	25.818	26.9215	25.7105	26.4715	26.8237	27.0272	28.3602	24.7149	22.1541	24.1704	20.6473	24.1688	22.8906	23.7375	19.6018	23.4768	21.7077	24.805	23.6022
179	30.8018	31.6592	28.7456	28.4559	30.7622	29.6838	24.5834	29.9388	28.9606	27.8593	26.4766	25.9913	17.1761	21.8211	17.6535	19.2437	14.0011	17.2428	16.4175	15.5513	12.9744	14.9218	18.8105	16.4681	20.0368	14.261	19.9036	15.3165	20.7245	20.9382	22.6764	23.8601	22.7445	23.5042	24.3087	24.3082	26.3031	23.2069	20.0438	21.8548	17.6437	21.3838	20.0317	20.8385	16.5859	20.6424	19.5796	22.3263	21.552
180	29.94	30.9538	28.2837	28.1316	30.4735	29.4986	24.509	30.2082	29.5339	29.3052	27.1139	26.5884	18.5008	22.3097	18.6193	19.3286	14.9353	17.0535	16.8819	15.4903	14.1583	15.1723	19.2041	18.4621	21.1193	15.8755	21.5769	17.6284	22.555	22.7969	24.7001	25.7727	24.1686	24.3837	25.2829	24.9611	27.1364	24.6679	21.446	23.2631	18.7159	23.3354	22.304	23.6925	18.6466	23.2667	22.2322	24.6756	23.5785
181	26.3079	27.1351	24.1696	24.2546	26.4363	25.1326	19.9177	25.7843	24.8047	24.2915	22.2727	21.5496	13.1606	17.5397	13.8046	15.4817	10.9586	14.7272	14.644	14.9698	12.9494	16.5311	19.1737	17.602	19.1418	13.2589	17.771	13.3804	17.9878	17.6884	19.3655	20.3315	18.9639	19.4396	20.5161	20.6128	22.8426	20.7187	17.1254	18.4557	13.866	18.0823	16.8082	18.2607	13.1538	18.4421	18.4425	20.5602	20.3179
182	25.4432	26.6471	24.3919	24.4684	26.8319	25.5118	21.3613	27.535	27.4887	28.2078	24.526	24.4574	17.759	20.2442	17.4849	17.4293	14.6478	15.981	16.7984	16.1016	15.9629	17.6879	20.4865	20.2388	21.7241	17.0887	21.5706	18.5455	22.3228	22.2369	24.1958	25.0775	23.5674	23.2317	24.1719	22.883	25.5803	24.2793	21.0903	22.9347	18.1713	23.2682	22.3218	24.1056	18.636	23.7415	23.5241	25.2323	24.3291
183	19.6086	20.3484	17.8174	17.8999	20.1818	19.0304	14.5661	20.6323	20.6095	21.4544	17.7823	18.2055	12.42	15.3816	13.2193	14.3456	12.0696	15.2013	16.2812	17.2825	16.5565	19.9082	22.1717	20.5752	21.5822	16.2894	19.3109	15.9051	18.8223	17.9375	19.3749	19.6313	17.4314	16.7251	17.5767	16.0616	18.8953	18.4296	15.3199	16.9808	12.245	17.8112	17.1841	19.6164	13.6768	20.2668	21.3119	22.5472	22.7027
184	19.5878	20.7614	18.5759	19.0409	21.6131	19.6067	16.3884	23.205	23.6097	24.5698	19.9937	20.4912	16.1376	17.0282	15.8782	15.4244	14.9967	16.1434	17.9464	18.6089	18.8154	21.4833	23.3002	22.6036	23.3126	19.2169	21.5974	19.5087	21.5119	20.7932	22.4356	22.8235	21.2859	20.4551	21.5139	19.5687	22.6986	23.01	20.2694	21.5957	16.9164	22.1541	21.2567	23.3513	18.0405	23.621	24.6409	24.9639	25.1537
185	16.2504	16.8763	14.5735	14.8276	17.236	15.6601	11.9014	18.4385	18.9007	20.0383	15.6541	16.6089	13.0357	14.3843	14.0808	14.7569	14.8259	17.1885	18.9878	20.0786	20.1962	23.5025	25.2281	23.7503	24.4689	19.6634	21.4273	18.6108	19.8804	18.636	19.7789	19.2027	17.2123	16.0603	16.9155	14.7086	17.887	18.4798	15.9072	17.2482	12.8767	18.2693	18.1157	20.8867	15.263	22.2435	23.8211	24.4024	25.3421
186	15.1318	15.7619	13.6905	14.8631	17.4837	14.707	13.1363	20.0175	21.062	22.2858	17.0957	18.3282	16.3182	16.1371	16.8873	16.0855	17.7242	18.5525	20.7657	21.9567	22.9934	25.7912	27.1267	25.9108	26.2715	22.3966	22.8944	20.6915	21.8134	20.92	22.5396	22.0122	20.8561	19.5485	20.5333	17.9041	21.277	22.9268	20.7077	21.5859	17.7413	22.5973	22.0326	24.1933	19.5761	25.166	26.7298	26.0544	27.3959
187	12.5935	13.4079	11.7494	13.1537	15.8291	13.4719	12.8551	19.3258	20.8279	22.2813	17.0422	18.7619	17.6987	17.2318	18.5989	17.5292	19.5861	20.1661	22.5555	24.1866	25.891	28.6252	29.5205	28.1959	27.8895	24.7043	24.2186	22.2158	22.9207	22.1207	23.853	22.8193	21.611	20.1682	20.8986	17.8737	21.2087	23.311	21.4015	22.3134	19.0739	23.6941	23.462	25.7519	21.2853	26.7916	28.4839	27.3725	28.8446
188	14.4988	14.2443	12.3703	14.0233	16.5185	12.5802	11.8886	19.1567	19.5171	20.133	14.6818	15.1473	14.1798	12.5641	13.9343	12.7591	14.9918	15.741	18.517	20.4506	22.7828	25.3944	26.0741	24.4338	23.8565	20.3414	19.2215	17.4201	17.677	17.3551	19.2883	19.0315	18.9236	18.1295	19.5694	18.0219	21.3473	23.4827	21.4756	20.8953	17.8262	20.9065	19.9936	21.3694	17.9996	22.0716	23.8977	22.2907	24.0326
189	12.815	12.0085	11.393	13.4101	15.7283	12.4306	13.3074	19.6498	21.1568	22.4214	16.9956	18.6234	18.6254	17.5409	19.2292	18.4018	20.6309	21.3197	23.9682	25.902	28.1616	30.8583	31.5586	29.8633	29.2219	25.9053	24.8544	23.0303	23.1945	22.4281	24.1938	23.0382	22.4384	21.0868	22.1628	19.3561	22.6322	25.0078	23.5669	23.8364	21.1961	25.0303	24.5725	26.4397	22.8413	27.6296	29.5034	27.9041	29.6443
190	9.5591	8.99336	8.59646	10.4192	12.8532	10.5019	11.4771	17.025	19.3132	21.1141	16.0681	18.6582	19.3378	19.1196	21.1376	20.8716	23.43	24.4125	27.1765	29.2257	31.1974	34.2398	34.9641	33.1592	32.529	29.0175	27.6812	25.6094	25.6964	23.9919	25.3275	23.2775	22.0638	19.9456	20.5429	17.2173	20.2894	22.7637	21.8523	22.8224	20.8104	24.8283	25.2397	27.7666	23.7654	29.8235	31.8537	30.5882	32.6001
191	7.76269	9.47725	8.8655	9.74144	12.4298	12.1858	11.6991	16.1783	19.2634	21.4785	16.9277	19.89	20.0238	20.6373	22.1205	22.6696	24.7969	25.7503	28.2715	29.8108	30.8134	33.6602	35.0432	33.7729	33.8578	29.9823	29.5215	27.0723	27.6866	25.4167	26.4559	24.1802	22.2112	19.8376	19.2928	15.6725	18.5538	20.6494	19.5042	21.1746	19.4691	24.3079	25.4979	28.4899	23.6964	30.8395	32.9473	32.4474	34.3644
192	5.38851	6.40799	8.16454	10.192	10.4061	12.8432	13.8321	14.4333	19.6459	22.7488	18.9889	22.1412	22.8365	23.2424	25.0294	25.6023	27.7139	28.8536	31.4492	33.2605	34.6753	37.7519	38.9024	37.1919	37.0308	33.1262	32.4455	29.8711	30.375	28.0472	29.1116	26.6516	24.8403	22.2361	22.007	18.3557	20.8779	23.3583	22.8154	24.3781	22.9597	27.3658	28.4648	31.3869	26.93	33.7425	35.8734	35.2283	37.3778
193	9.24343	11.239	11.4943	12.6282	15.1096	15.4685	15.3768	18.4174	22.41	24.9152	20.6586	23.7418	23.9123	24.4896	25.9401	26.4635	28.3112	29.486	31.7206	33.03	34.2495	36.7295	37.9529	37.0309	37.1545	33.4101	33.3922	30.7704	31.5669	29.293	30.3593	28.056	26.008	23.4983	22.9351	19.2513	21.9734	24.1092	23.1281	24.9432	23.4023	28.1995	29.358	32.3456	27.555	34.6369	36.6604	36.2881	38.1473
194	6.96245	9.85624	10.9246	10.0465	12.6813	15.0223	14.3453	14.6347	19.4091	22.15	19.7431	22.9645	22.5623	23.9668	24.7373	26.2704	27.1827	29.2776	31.4959	32.9351	33.3802	36.6918	38.3038	36.7031	37.0227	32.3081	33.2488	30.1682	30.7298	28.4693	29.0203	26.7299	24.0338	21.3022	19.6696	15.9874	17.9818	19.7566	19.4022	21.4699	20.4538	25.6166	27.356	30.4454	25.4417	33.3072	35.4437	35.8114	37.5444
195	10.9612	13.6802	14.0594	13.8296	16.5178	18.1866	16.6819	19.1314	22.8689	25.0186	21.9708	24.958	23.7665	24.8283	25.3008	25.4398	25.883	27.3324	29.3838	30.2768	30.7191	33.4104	34.9679	34.148	34.7301	30.5603	32.2857	29.6915	31.0347	29.4393	30.5353	28.3987	25.5141	23.0934	21.5091	18.0482	20.3456	21.5613	20.2736	22.4161	21.2535	26.6985	28.4965	31.5947	26.312	33.5721	35.1556	35.3502	36.235
196	11.459	14.0747	13.5512	12.1148	15.2176	16.9356	14.2998	17.6648	20.2316	22.1251	19.1807	21.9798	20.6019	22.5943	22.7483	24.7159	24.8285	27.5247	29.5154	30.7917	30.7395	34.2087	36.0243	34.3907	34.9066	29.8308	31.3989	28.2936	28.8072	26.7999	27.166	25.0479	22.073	19.8025	18.2786	14.9575	17.3556	18.3151	16.8751	18.976	17.6499	23.1501	24.9814	28.0795	22.8301	31.0134	33.0873	33.9868	35.4243
197	14.3489	17.1786	17.3315	15.2927	18.5125	20.539	18.2312	20.2184	23.1337	24.7672	22.7289	25.3295	23.0991	25.7997	25.3276	27.6372	26.7934	30.0803	31.5134	32.5988	31.8612	34.9998	37.3678	35.9669	36.8434	31.4523	33.6893	30.3218	31.3165	29.5979	29.662	27.5826	24.2461	22.1848	19.9678	17.0616	18.7616	19.0355	17.816	20.0856	19.1478	24.7661	26.9136	29.9522	24.5956	33.0337	34.9897	36.5155	37.5006
198	17.5956	20.3522	19.9757	17.9217	21.2074	22.9334	20.0665	22.623	24.4983	25.9805	24.246	26.5915	23.2646	26.7969	25.6783	27.7267	25.5087	28.9134	29.8005	30.0651	28.9412	31.1286	34.4762	33.5208	34.9409	29.3211	32.6844	28.7235	31.2209	29.7745	30.2808	28.3281	24.8786	23.0925	20.6837	17.9746	19.3871	19.1849	18.1636	20.409	19.4366	25.0646	27.0385	29.8427	24.2248	32.286	33.7691	35.5413	36.0048
199	14.1288	16.5536	14.9439	12.9087	16.0984	17.5438	14.3949	17.1817	18.8031	20.3348	18.4281	20.8236	18.5182	21.4954	20.8972	23.8034	23.0787	26.5626	28.2718	29.3516	28.1251	31.2029	33.9571	32.4968	33.435	27.8944	29.7358	26.3309	26.8931	25.0604	24.8983	22.767	19.3715	17.4178	15.3039	12.6987	14.5854	14.3134	13.0576	15.3012	14.2848	19.8622	22.1183	25.1597	19.9645	28.5445	30.6843	32.2305	33.6479
200	18.1904	20.256	18.0831	15.7757	18.8009	19.725	16.2685	18.6496	19.5562	20.5521	19.8292	21.7325	18.0777	22.3092	20.8658	24.233	22.4448	26.6147	27.7363	28.948	27.5091	31.0755	33.6983	31.7716	32.6068	26.7467	29.137	25.1126	26.4877	24.7091	24.5273	22.4932	18.8227	17.3434	14.6719	12.574	13.8858	12.6334	11.7127	13.8489	13.2998	18.6027	21.1104	23.9888	18.878	27.445	29.4348	31.4862	32.7389
201	16.2267	17.7976	15.2826	13.4259	16.2658	16.719	12.5853	16.0217	16.7129	17.6518	15.8588	17.2087	13.0918	16.9899	15.7089	18.9559	17.7564	21.6863	23.2742	24.7072	23.8171	27.9452	29.9837	27.6937	28.1841	22.4507	24.3125	20.639	21.5016	19.7519	19.8391	18.1485	14.835	13.5959	12.2818	10.4521	12.4865	11.2719	9.64398	11.6593	9.07464	14.9157	16.6864	19.6478	14.2612	22.8285	24.9067	26.7456	28.13
202	20.9411	21.9189	18.9287	17.4156	19.7329	19.002	15.0033	17.8314	17.2228	16.5135	17.2897	18.4602	13.6896	18.7735	16.8193	20.856	19.2971	23.8535	25.0972	26.5719	24.8059	29.148	31.3957	28.8576	29.3369	23.3301	25.1783	20.9006	21.8705	19.9404	19.2083	17.64	13.972	13.326	11.312	11.0226	12.1395	8.85819	7.0555	9.24661	8.38655	12.9378	15.1823	18.1988	13.7909	22.2611	24.4705	26.8841	28.6749
203	22.3723	22.7954	19.6179	18.736	20.9289	19.7812	15.3758	19.1729	18.0118	16.1781	16.4811	17.279	10.7093	16.5171	13.7956	17.7964	15.5309	20.329	21.2639	22.7394	20.9366	25.4632	27.6051	24.741	25.1548	19.1259	21.1207	16.6611	18.2173	16.4842	16.2169	15.4998	12.4547	12.689	12.5069	12.9666	14.0274	10.2065	7.79729	9.71111	6.9223	10.9017	12.2267	14.7588	10.2159	18.1799	20.1535	22.6838	24.3812
204	24.6002	24.94	21.7245	20.4549	22.5398	20.3241	16.6133	19.3193	17.4127	13.2993	15.8623	17.0888	11.5051	17.0129	14.7414	19.0975	17.5623	22.2603	23.3619	24.9714	23.0305	27.6156	29.7152	26.3305	26.6368	20.7665	22.0755	17.4307	18.2413	16.5162	15.1549	14.4287	11.4396	12.0945	11.5443	13.0576	13.6547	9.42176	6.85067	7.2477	6.96433	8.55706	10.5817	13.4535	10.529	17.8653	20.121	22.9325	25.1753
205	26.2132	26.0872	22.7527	21.9747	24.0517	21.5179	17.5325	21.1934	19.0295	15.2881	16.1301	16.6661	9.88901	15.5572	12.5243	16.5386	14.3568	19.0664	19.8232	21.4088	19.4779	24.1452	26.063	22.4664	22.5881	16.8589	18.1802	13.6052	14.7961	13.5498	12.8798	12.9709	11.4496	12.9373	13.5486	14.9497	15.8556	11.6094	9.10355	9.60295	7.11825	8.83235	8.54046	10.6186	7.75163	13.9854	15.913	18.8428	20.9743
206	28.5656	28.3303	25.0642	23.8945	25.5301	22.8621	19.5926	22.0398	19.6733	14.6121	16.3478	17.0051	11.2338	16.2847	13.7427	17.6947	16.2721	20.5811	21.4207	23.1101	21.2903	25.9075	27.434	23.5624	23.4224	18.1614	18.4199	14.0636	14.4954	13.5541	11.9537	12.3609	11.6523	13.6358	14.2106	16.1107	16.9701	12.934	10.4211	9.53905	7.1727	8.05229	7.10696	9.36764	8.2607	13.2964	15.3609	18.4789	20.8709
207	30.2779	29.7023	26.3035	25.888	27.5886	24.5585	20.6367	24.5849	21.9281	16.8109	18.4369	18.4729	10.9224	16.1401	12.9047	16.162	12.388	17.0552	16.8107	18.097	15.5813	19.9606	21.835	17.4104	18.6816	13.39	15.296	10.7951	13.7584	13.2354	13.0078	13.9361	13.8674	15.6881	16.5061	18.7602	20.0121	16.1665	13.5049	12.0188	9.42343	10.272	8.0427	9.84089	7.56551	12.178	12.8151	15.8506	17.2309
208	32.6031	31.7776	28.4959	27.7118	28.732	25.6238	22.7198	25.4312	22.471	16.9422	18.4425	18.698	13.2402	16.8495	14.5063	17.2765	15.92	19.3024	19.6579	21.3512	19.7511	24.0053	24.5859	20.6915	19.9511	16.0513	15.0844	11.8841	12.0442	12.3702	11.4462	13.1597	14.0322	16.2661	17.3425	19.9803	21.6883	17.917	15.5075	13.2305	10.3342	10.2048	7.14227	7.3687	7.68989	9.85618	11.1368	14.3373	16.5069
209	34.8079	33.729	30.5198	29.8124	30.245	27.0144	24.706	26.8333	23.6675	17.5088	19.2253	19.1138	14.9768	17.7096	15.7924	17.6607	15.2116	18.0641	17.6227	18.8451	17.0232	20.7844	21.0214	16.8673	16.5757	13.529	13.0118	11.0943	12.2542	13.3271	11.4992	13.3508	14.768	17.7137	19.2988	22.1754	23.7364	20.1514	18.3583	15.4547	12.6908	11.612	8.21943	6.58916	7.47609	9.21765	9.14653	12.1549	13.7454
210	34.2134	32.4698	29.5863	29.2263	28.9244	25.444	24.0354	26.1211	22.6547	16.4476	17.4867	16.6194	14.0081	15.2562	15.1058	17.2945	18.0369	20.5288	21.3918	23.5379	22.6314	26.6775	26.4492	23.0232	21.0447	17.985	15.246	13.0744	10.8443	11.5813	8.82941	11.42	13.3775	16.8955	19.36	22.5067	24.2294	21.0883	19.7931	16.5165	13.7507	11.4407	8.22775	2.76801	8.13304	6.90698	11.0183	12.7378	15.6131
211	36.2019	34.8674	31.914	31.0281	30.9893	27.8118	26.3348	27.4377	24.2184	17.7149	19.96	19.7663	17.4221	19.39	18.7904	21.0571	21.4156	23.8977	24.5479	26.6782	25.8428	29.7591	29.3008	25.9821	23.7836	21.0971	18.4569	16.3674	14.6562	15.3731	12.812	14.417	15.6148	18.8087	20.5202	23.5842	24.5767	21.3278	20.9761	16.9941	15.1031	12.9248	10.6021	7.02717	11.3559	11.075	14.1091	16.5884	18.5939
212	36.9747	35.307	32.6466	31.8407	31.1569	28.0119	27.4047	27.8246	24.4568	17.701	20.2925	19.6036	18.1799	19.2627	19.026	21.2077	21.5723	23.8417	24.4997	26.8008	26.6117	30.1682	28.7314	25.8395	22.9984	21.028	17.7911	16.8117	14.5018	15.768	12.3739	15.1969	16.3542	19.9044	21.9305	25.0668	25.7262	23.2226	23.7909	19.437	17.8451	14.933	12.623	6.11579	12.0887	9.72282	13.6968	14.9394	16.9362
213	36.174	34.2739	31.3182	31.4361	31.2971	27.6006	25.6538	29.0398	25.4041	19.9266	19.7842	18.4557	15.0499	15.6618	13.9805	15.9758	15.9307	18.1785	18.8124	21.221	21.4185	24.964	23.3795	20.439	17.5233	15.4874	12.0371	11.4349	9.30411	11.111	9.94495	12.9893	15.7211	19.2485	22.0352	25.1645	27.4546	24.7777	23.4297	20.4493	17.3424	14.151	10.7805	2.77262	7.18797	4.41511	8.06502	9.41623	11.4845
214	40.7604	38.9681	36.0118	35.8717	35.6978	32.1153	30.3307	33.0362	29.5364	23.4359	24.1828	23.0682	19.9278	20.6948	19.0854	20.9873	19.9428	22.1786	22.0096	23.7311	23.3575	26.0116	24.0448	21.1185	18.8401	17.6154	15.4124	15.8631	14.3683	16.1658	14.5185	17.6586	20.007	23.5141	26.0183	29.1768	31.0207	28.0798	26.9727	23.6778	20.8319	18.0471	14.6142	7.05513	11.5205	9.52483	11.0008	12.7203	13.3407
215	40.7335	38.7985	35.799	36.1455	36.1449	32.3768	30.0931	33.9951	30.3927	24.6894	24.6955	23.2073	19.4866	19.3247	16.9426	18.3123	16.679	18.7935	18.4485	20.0836	20.1243	22.6483	20.3334	17.8172	14.9541	13.8935	11.958	13.3101	12.4049	14.6418	14.2632	17.7558	20.6581	24.1022	26.8967	29.9716	32.224	29.3466	27.8371	24.9342	21.7706	18.8794	15.2115	7.63153	10.0052	7.1928	7.3854	9.07673	9.25705
216	36.4224	34.5465	31.5088	31.8295	31.924	28.1581	25.7674	29.8953	26.2136	21.2458	20.4956	19.1181	15.249	15.4799	13.0947	14.7565	13.7121	15.9714	16.1264	18.1827	17.9168	21.0558	19.4784	16.6416	13.9415	12.1668	9.31135	9.69672	8.39692	10.5809	10.9325	13.5412	16.4288	19.8177	22.6281	25.674	28.0678	25.5946	23.6515	21.1794	17.4944	14.6982	11.0364	4.62463	5.8707	3.64959	5.23583	6.69976	8.18798
217	35.6973	33.9637	30.7984	31.3245	31.8466	28.0636	24.9857	29.9094	26.4113	22.2777	20.7562	19.2544	14.3205	14.8065	11.7798	12.9208	11.2012	13.3396	13.169	14.1061	12.8034	15.8494	15.208	11.6057	10.6215	8.66671	7.0914	6.91405	7.54291	9.59729	10.9764	13.9423	16.7468	19.764	22.4475	25.2957	27.776	25.5383	22.7656	20.7637	16.5475	14.7167	10.8654	6.99693	4.30936	3.75809	2.92649	5.584	7.33515
218	34.0105	32.5305	29.3047	29.4076	29.9649	26.2599	23.3778	27.4149	23.9087	18.6732	18.6129	17.4892	12.6663	14.0876	11.799	13.4959	12.3279	14.5487	14.7028	16.6304	15.891	19.5871	18.9966	15.6695	13.6387	11.0619	9.04036	7.29412	7.21406	8.88391	9.42524	11.8694	14.1921	17.3908	19.7286	22.7288	24.9617	21.9633	19.5804	17.4146	13.8624	11.5625	7.61712	3.73956	3.07157	4.02013	4.76739	7.82202	9.58421
219	30.0781	28.8371	25.5841	25.521	26.2187	22.6539	19.6547	23.8182	20.34	15.8794	15.1835	14.476	8.81771	11.8136	9.63356	12.2116	9.75986	13.8766	14.3325	16.0035	14.4974	19.1309	20.303	16.6244	15.4124	10.9434	10.0978	7.15069	7.10929	7.22135	7.1607	9.1396	10.8422	13.6205	15.8536	18.7352	21.0375	18.4211	15.1335	13.7547	9.94135	7.93372	3.87649	3.34162	2.76973	5.13096	6.21546	9.43453	11.7084
220	29.4671	28.4284	25.153	24.5977	25.4904	22.2108	19.2983	22.5207	19.3338	14.2629	14.91	14.834	9.5536	13.2532	11.1738	14.3466	13.6718	16.9432	17.6958	19.7547	18.6593	23.1001	23.5783	19.9312	18.7023	14.4923	13.1522	9.48096	9.33064	9.21265	7.76672	9.31437	10.5507	12.8603	14.3767	17.1653	19.164	15.9284	13.4387	11.2805	7.71094	6.80711	3.24838	3.94803	4.96523	7.49219	9.46021	12.5975	15.0135
221	24.6563	23.8079	20.4367	20.0726	21.4818	18.3037	14.6275	18.7101	15.6758	10.4814	11.824	12.2096	5.55561	10.9281	8.1051	12.3728	11.8282	15.9957	17.4584	19.36	17.9801	22.6965	24.0392	20.3376	19.8134	14.4747	14.7007	10.1433	10.4953	9.20112	7.68997	7.68458	7.31878	9.44755	10.6265	13.0891	15.271	11.9758	9.24341	7.35395	3.96502	3.43748	2.87756	5.10365	3.52856	9.50212	12.059	15.0263	17.4951
222	25.2671	24.8643	21.6459	20.4033	21.4642	19.0492	16.074	17.2712	15.1495	9.62386	12.8272	13.9837	9.20022	14.1157	12.3299	16.564	16.3286	20.3661	21.6777	23.7579	22.4703	27.1928	28.5039	24.7894	24.1052	18.8978	18.5232	13.9623	13.6744	12.2912	9.93028	9.8516	8.19926	10.0059	9.94512	12.2525	12.9097	8.95765	7.46472	4.48582	3.48299	4.38637	5.37211	7.79573	7.54546	12.9939	15.6126	18.5438	21.1057
223	21.4928	21.3241	18.1593	16.724	18.3915	16.0695	12.7982	14.9822	12.8547	9.51321	11.4384	13.0459	6.45215	12.318	9.59475	13.8444	12.737	17.207	18.7486	20.4249	18.8645	23.5661	25.5022	22.1952	22.2557	16.3447	17.7013	13.2242	14.0827	12.2057	11.2128	10.3847	7.24501	7.67005	7.30282	8.89441	10.0903	6.63925	3.45042	3.34994	2.76268	5.06285	6.50263	9.70802	5.96395	14.3913	16.4747	19.0767	21.0411
224	20.9685	21.3334	18.2391	16.7363	18.9315	17.1496	13.5013	15.0993	14.0968	10.9253	13.5785	15.1024	10.3538	15.5942	14.0693	18.5798	18.0611	22.4737	24.0259	25.881	24.4983	29.2097	31.1161	27.6941	27.5166	21.7407	22.4545	17.7738	18.0457	16.023	14.1859	12.8884	9.41026	9.63932	7.82414	8.79288	8.64272	4.19547	3.20925	4.20657	4.95288	7.46364	9.66502	12.9602	10.2287	18.0392	20.6446	23.3105	25.8102
225	17.293	17.993	15.0827	13.4008	15.528	14.6685	11.0839	13.1452	12.6435	12.2748	12.9192	13.5657	8.34969	13.395	11.4297	15.4824	14.78	19.019	20.7846	22.5918	21.6779	26.2532	28.142	25.0851	25.0974	19.2806	20.396	16.1812	16.7636	14.809	14.4791	12.9693	9.64105	9.20256	6.72134	6.18393	7.53798	4.88947	2.86288	5.09106	3.50812	9.12189	10.9696	13.8316	8.90259	17.6503	20.0348	22.1669	24.1867
226	17.8318	19.0764	16.376	14.1945	16.6394	16.4935	12.9224	14.847	14.8577	14.3438	15.5269	17.1661	13.7516	18.1961	17.0367	21.1512	20.5758	24.8329	26.5609	28.1913	26.9774	31.4471	33.5026	30.6738	30.861	24.9618	26.2368	21.928	22.3367	20.2376	19.064	16.8737	13.0216	11.8356	8.63888	7.74236	7.70423	4.87149	5.35463	7.17132	8.04029	12.4394	15.1939	18.4589	14.3906	23.0653	25.5697	27.7999	29.9689
227	14.9516	16.828	14.7168	12.0452	15.0247	16.2011	12.8047	14.8296	15.5401	16.4338	16.5494	18.6689	16.2661	20.1261	19.3213	23.1589	22.7885	26.8086	28.6453	30.2184	29.179	33.4918	35.5565	32.9723	33.2486	27.4131	28.759	24.654	24.9522	22.8191	21.7633	19.2962	15.4687	13.5588	10.3859	8.21493	9.35639	8.29035	7.50372	9.8075	10.7134	15.3737	18.2793	21.5231	17.2467	26.0248	28.5255	30.4815	32.6184
228	17.9254	19.9329	17.9742	15.2412	18.2277	19.3598	15.9172	17.8295	18.9099	19.8948	19.9048	22.0754	19.3853	23.3813	22.2699	25.9399	24.946	29.0605	30.55	31.9322	30.3041	34.2459	36.7324	34.518	35.2187	29.224	31.2829	27.1578	27.9254	25.9365	25.1101	22.7716	18.9591	17.1168	13.8771	11.4684	12.2279	11.3763	10.9688	13.2453	13.9123	18.6838	21.3063	24.4925	20.1324	28.7126	30.916	33.2584	34.8926
229	17.7801	20.1923	19.6681	16.6151	19.6947	21.3921	18.1689	19.4335	21.1823	22.2385	22.5993	25.065	22.7968	26.6113	25.6547	29.2701	28.2648	32.3373	33.7702	35.0842	33.7185	37.4908	39.9557	37.9074	38.588	32.7073	34.6834	30.7217	31.3451	29.3437	28.4117	25.9467	22.1074	20.0041	16.48	13.7006	13.9734	13.7619	13.7663	16.094	17.2763	21.921	24.7948	28.0366	23.5928	32.3397	34.6446	36.7939	38.4156
230	20.3559	22.8199	21.9539	19.0165	22.2148	24.0373	21.0353	22.355	24.3399	25.4943	25.4374	27.7345	23.8909	28.1483	26.6904	29.9512	27.7701	31.9522	32.7309	33.5315	31.9392	34.7657	37.955	36.4706	37.6255	31.78	34.6167	30.4298	32.2434	30.4962	30.335	28.389	24.6802	23.1141	19.7597	16.9738	17.3661	17.088	16.9918	19.298	19.0848	24.2278	26.6482	29.5764	24.5684	33.0356	34.8936	37.0111	38.0473
231	20.7675	23.3548	23.8717	20.6344	23.5521	26.0004	23.1816	23.3711	26.2127	27.4803	27.769	30.3262	27.7749	31.7163	30.6	34.0378	32.5082	36.5962	37.6792	38.7124	37.1705	40.1514	43.2171	41.6086	42.6034	36.7456	39.205	35.1491	36.2937	34.3805	33.6716	31.2953	27.4651	25.3893	21.8366	18.9585	19.0162	18.9509	19.1279	21.4305	22.4567	27.1986	29.9827	33.1689	28.5451	37.2175	39.3354	41.4792	42.8022
232	22.4688	24.6654	23.6851	20.3499	23.2362	24.9953	21.5986	22.2195	23.9508	24.8998	26.258	28.7357	25.7818	30.0995	28.8026	32.6099	30.9965	35.3937	36.4169	37.6066	35.7377	39.0846	42.065	40.1133	41.0193	35.021	37.3675	33.1028	34.1876	32.203	31.1535	28.9083	25.0032	23.1353	19.145	16.544	15.8409	15.6116	16.442	18.5941	20.1332	24.33	27.0743	30.3547	26.1747	34.7193	36.9003	39.2857	40.8456
233	24.4161	26.5986	24.628	22.1031	25.1195	25.9972	22.4899	24.5713	25.1795	25.4421	25.8617	27.4229	22.7654	27.6512	25.7337	29.2955	26.6546	31.2065	31.6939	32.4988	30.4943	33.4014	36.7231	34.7682	36.2619	30.2915	33.2656	28.7884	30.908	29.1683	28.8362	27.2379	23.517	22.5291	19.5199	17.8117	18.2329	16.2534	16.1373	18.0495	17.8737	22.5854	24.8091	27.7241	23.0084	31.2375	33.0213	35.3752	36.4773
234	25.4636	27.9849	28.3512	25.0126	27.8009	30.2702	27.7208	27.3603	30.4166	31.3315	32.0876	34.3319	30.9658	35.4712	33.9331	37.5238	35.3119	39.7112	40.3301	40.9911	39.143	41.5889	45.2173	43.4355	45.0242	39.0848	41.9735	37.5822	39.3209	37.454	36.7142	34.6206	30.7438	29.0447	25.3386	22.8548	22.4872	21.7887	22.3644	24.4696	25.6096	30.0244	32.6292	35.7987	31.3604	39.7868	41.729	44.0862	45.281
[truncated: 180 more columns]

## Sheet: ppluGFP2
	2	3	4	5	6	7	8	9	10	11	12	13	14	15	16	17	18	19	20	21	22	23	24	25	26	27	28	29	30	31	32	33	34	35	36	37	38	39	40	41	42	43	44	45	46	47	48	49	50
2	0	1.33555	3.62086	6.81491	10.1578	13.5058	16.9741	19.4887	23.2932	26.7554	29.8206	30.6712	34.6082	35.6785	32.2601	30.7706	25.6412	23.9744	20.2174	17.5982	13.7169	10.9458	6.85721	4.09728	3.38152	4.32003	5.9726	8.20329	7.34882	10.1708	7.04142	8.04574	7.73213	10.8677	13.0857	16.2607	19.3595	22.8751	23.4548	27.5579	28.2547	29.6596	25.7709	31.1011	27.2749	26.8913	23.1087	23.609	24.2747
3	1.33555	0	1.33117	3.76583	7.12448	10.2963	13.6291	16.0917	19.8688	23.3226	26.3889	27.4945	31.2222	32.2461	28.8407	27.366	22.2277	20.8633	16.9296	14.6504	10.7821	8.10111	4.33593	3.28426	2.77717	4.94314	3.73244	7.74458	9.66552	10.0584	7.32739	7.22585	6.92647	9.07255	10.9332	13.1521	16.6573	20.0767	20.6178	24.5949	25.4787	27.1366	23.0214	28.2731	24.336	24.4431	20.8071	21.4773	21.567
4	3.62086	1.33117	0	1.32957	4.20593	7.64305	10.9985	14.2908	17.4377	20.982	24.2528	26.1723	29.5634	30.1724	26.862	25.1877	20.4176	18.1952	14.5611	12.3277	8.27729	6.68031	3.53806	4.45204	5.0354	7.44066	8.39839	11.766	12.3318	13.1774	9.56746	8.82598	7.28101	8.73313	10.2141	11.5109	14.8712	18.194	18.0742	22.2996	23.6255	25.5207	21.6759	26.7452	23.0485	23.6207	20.1646	21.2363	20.9409
5	6.81491	3.76583	1.32957	0	1.32979	4.27613	7.49683	9.76133	13.4725	16.8913	19.9511	21.3462	24.8832	25.7981	22.4212	20.9932	15.827	14.6524	10.7785	8.35911	4.35474	3.01965	2.71435	3.56228	3.78041	6.45268	8.69162	11.4407	11.2169	9.75089	6.50047	4.13674	3.43468	4.61752	6.91889	7.26225	10.9343	14.2313	14.1896	18.3484	19.6811	21.4921	17.1895	22.3102	18.3194	18.9059	15.5402	16.5714	16.0918
6	10.1578	7.12448	4.20593	1.32979	0	1.33077	4.53293	7.92104	11.0443	14.6029	17.9605	20.4845	23.5227	23.8037	20.626	18.8402	14.4485	11.3818	8.31663	7.08525	3.60348	4.2211	4.86051	6.79631	8.30384	11.5066	12.9513	16.3059	16.5185	15.5926	12.2662	9.24191	7.46069	5.88697	7.66082	6.69094	10.4366	13.1647	11.8786	16.5077	18.2741	20.2721	16.5203	21.2823	17.5849	19.1594	16.2362	17.8039	16.6149
7	13.5058	10.2963	7.64305	4.27613	1.33077	0	1.33148	4.14114	7.73497	11.169	14.2062	16.1026	19.3056	20.0806	16.7802	14.9157	10.2369	8.02219	4.18349	3.3681	2.68	4.11945	5.95124	8.86326	10.8919	13.8833	15.7318	18.6358	18.3615	16.1591	13.5667	8.51594	7.61244	3.79128	6.21679	3.50499	7.07288	9.25322	8.27974	12.3257	14.1663	16.2538	12.6208	17.4078	13.2172	14.7566	12.0401	13.4471	12.0826
8	16.9741	13.6291	10.9985	7.49683	4.53293	1.33148	0	1.32912	3.97308	7.77816	11.2509	13.8594	17.0302	16.6032	13.9067	11.9047	8.0395	3.44245	3.34692	3.36933	5.01125	6.72222	9.13957	12.0831	13.9882	16.9483	18.4331	21.5585	21.5766	19.2546	16.7616	11.5867	10.8505	6.73874	8.15527	4.97331	7.87364	9.29719	5.73483	9.45948	12.7446	15.4835	11.373	15.7752	11.8851	14.7523	12.9169	14.8237	12.8104
9	19.4887	16.0917	14.2908	9.76133	7.92104	4.14114	1.32912	0	1.33101	4.45398	7.7397	9.76334	12.7314	13.195	10.0327	8.22255	3.85829	3.21544	2.83702	5.02191	6.47985	8.90773	11.3894	13.704	15.3625	17.7169	19.5418	21.997	21.0652	17.7141	16.1552	10.5634	11.0129	5.94101	8.66764	3.27606	7.09657	7.50955	6.70882	7.20977	10.5225	12.0518	8.04264	12.1257	7.57039	10.5537	8.37473	9.91581	8.13068
10	23.2932	19.8688	17.4377	13.4725	11.0443	7.73497	3.97308	1.33101	0	1.32709	4.80853	7.92223	11.0871	10.5976	8.10756	7.10776	3.67461	3.43469	5.06789	6.64963	9.68178	12.3407	15.1588	18.0216	19.8171	22.4304	23.6819	26.6589	26.4341	23.1768	21.5033	15.7842	15.9962	10.9803	12.5444	7.85982	9.32292	9.72212	6.87476	6.6956	12.0269	13.1792	9.43936	11.713	8.6975	13.0892	12.5946	14.3461	11.5093
11	26.7554	23.3226	20.982	16.8913	14.6029	11.169	7.77816	4.45398	1.32709	0	1.33232	4.45173	7.58565	6.52075	4.15331	3.43538	2.93513	5.05908	6.62147	9.87684	12.7334	15.5445	18.4702	21.3172	23.1258	25.6327	26.8728	29.7403	29.2247	25.7981	24.4018	18.6679	19.0804	13.989	15.3196	10.3594	11.0479	9.98767	8.9961	5.26415	11.2668	11.1181	8.65386	8.57702	7.16827	12.2842	13.0433	14.3697	10.4912
12	29.8206	26.3889	24.2528	19.9511	17.9605	14.2062	11.2509	7.7397	4.80853	1.33232	0	1.33087	4.06746	4.21206	3.36198	3.79536	3.64074	7.1984	9.07009	13.107	16.0897	18.7665	21.6012	24.2832	25.9619	28.2431	29.4191	32.1038	31.1528	27.63	26.6374	20.9463	21.7563	16.6625	18.059	12.9313	13.8013	11.7266	11.676	7.04818	12.7939	11.9295	9.62481	7.53615	6.19848	11.1452	12.8218	13.4021	8.11211
13	30.6712	27.4945	26.1723	21.3462	20.4845	16.1026	13.8594	9.76334	7.92223	4.45173	1.33087	0	1.33335	3.1159	2.82401	4.88332	3.97409	8.54246	9.77511	14.8688	17.9988	20.2282	22.6479	24.8018	26.3577	28.1918	29.7226	31.8059	29.5595	26.0521	25.6616	20.3679	21.4429	17.0913	18.2604	13.4572	14.8737	11.7062	13.2307	8.94614	11.9059	10.0508	7.57355	4.77201	3.38362	6.52326	8.98266	9.53081	3.66538
14	34.6082	31.2222	29.5634	24.8832	23.5227	19.3056	17.0302	12.7314	11.0871	7.58565	4.06746	1.33335	0	1.33231	3.26523	6.59958	7.01134	11.787	13.0224	18.1018	21.1921	23.6104	26.3181	28.742	30.3614	32.3387	33.7352	35.9485	34.0877	30.5373	30.08	24.5574	25.6871	20.9617	22.0325	17.1123	18.0338	14.6836	16.4077	11.8434	14.7588	12.7527	11.0017	7.22438	7.1619	10.8331	13.3573	14.4561	8.48358
15	35.6785	32.2461	30.1724	25.7981	23.8037	20.0806	16.6032	13.195	10.5976	6.52075	4.21206	3.1159	1.33231	0	1.33287	3.50009	6.82355	10.405	13.2425	17.4354	20.8591	23.8889	26.9754	29.7902	31.7318	33.9254	35.2349	37.6573	36.1093	32.5551	31.9047	26.3292	27.1888	22.2261	22.6699	18.0345	17.2997	13.6058	13.9333	8.25702	13.7363	12.0237	11.4286	7.57385	8.93096	13.2286	15.4388	16.8792	11.0862
16	32.2601	28.8407	26.862	22.4212	20.626	16.7802	13.9067	10.0327	8.10756	4.15331	3.36198	2.82401	3.26523	1.33287	0	1.32915	3.69384	7.16792	9.48412	14.0544	17.442	20.2862	23.3797	26.1968	28.2561	30.686	32.421	34.8573	33.407	29.9423	28.8225	23.3792	23.5514	18.697	18.8985	14.3741	13.7939	10.182	11.4239	6.55576	9.57786	7.34312	7.07082	3.65325	5.62945	10.8459	12.4644	14.2105	9.92639
17	30.7706	27.366	25.1877	20.9932	18.8402	14.9157	11.9047	8.22255	7.10776	3.43538	3.79536	4.88332	6.59958	3.50009	1.32915	0	1.33076	4.65192	7.9189	11.7316	15.2503	18.348	21.646	24.6819	26.9813	29.665	31.563	34.1271	32.9807	29.6086	28.0969	22.671	22.3748	17.527	17.1849	13.0676	11.2548	7.28938	8.25941	3.28966	7.63428	6.93906	6.57156	5.6191	6.4378	11.7136	12.4266	14.4714	11.6594
18	25.6412	22.2277	20.4176	15.827	14.4485	10.2369	8.0395	3.85829	3.67461	2.93513	3.64074	3.97409	7.01134	6.82355	3.69384	1.33076	0	1.33169	3.69651	8.24134	11.6945	14.235	17.0325	19.669	21.5687	23.9505	25.727	28.147	26.8755	23.4379	22.1734	16.67	17.0102	12.0313	12.962	7.96226	8.34631	6.05038	6.00576	3.66624	7.09653	7.06034	4.2027	5.99029	3.63283	8.59014	8.91758	10.4794	7.1942
19	23.9744	20.8633	18.1952	14.6524	11.3818	8.02219	3.44245	3.21544	3.43469	5.05908	7.1984	8.54246	11.787	10.405	7.16792	4.65192	1.33169	0	1.32911	4.16065	8.1957	11.4097	14.8514	18.0739	20.6576	23.6447	25.8618	28.5082	27.1967	24.6654	22.5226	17.3378	16.2139	11.64	10.6504	7.31565	4.29049	3.35203	2.88673	3.38208	6.14557	8.29914	5.47519	8.84349	7.29023	11.5701	11.0143	13.1653	12.1675
20	20.2174	16.9296	14.5611	10.7785	8.31663	4.18349	3.34692	2.83702	5.06789	6.62147	9.07009	9.77511	13.0224	13.2425	9.48412	7.9189	3.69651	1.32911	0	1.32967	4.57816	7.8076	11.2013	14.4445	16.9135	19.9705	22.0444	24.8511	23.7315	21.2142	19.1325	14.0607	12.8296	8.2614	7.48536	4.13458	3.17114	3.79587	4.42472	6.1176	7.27068	8.46744	4.28373	8.90521	6.04166	8.74983	6.99935	9.03793	9.35233
21	17.5982	14.6504	12.3277	8.35911	7.08525	3.3681	3.36933	5.02191	6.64963	9.87684	13.107	14.8688	18.1018	17.4354	14.0544	11.7316	8.24134	4.16065	1.32967	0	1.32617	4.68269	8.30028	11.7537	14.7238	18.065	20.4978	23.3348	21.64	20.5659	17.4922	13.2655	10.7739	6.39504	4.35101	3.14713	2.78285	5.06804	3.81271	7.99082	9.81322	11.9741	8.97696	13.7477	11.5723	13.9613	12.0482	14.1308	13.7575
22	13.7169	10.7821	8.27729	4.35474	3.60348	2.68	5.01125	6.47985	9.68178	12.7334	16.0897	17.9988	21.1921	20.8591	17.442	15.2503	11.6945	8.1957	4.57816	1.32617	0	1.3264	4.74619	8.25086	11.2244	14.6529	16.8439	19.8847	18.4299	17.8608	14.596	10.8118	7.82641	4.2184	3.28118	3.85524	4.87458	7.58154	7.27135	11.3001	12.9138	14.9462	12.0592	16.9009	14.3723	16.0497	13.4348	15.5728	15.2151
23	10.9458	8.10111	6.68031	3.01965	4.2211	4.11945	6.72222	8.90773	12.3407	15.5445	18.7665	20.2282	23.6104	23.8889	20.2862	18.348	14.235	11.4097	7.8076	4.68269	1.3264	0	1.32531	4.66549	7.88691	11.3358	14.1221	16.8253	14.7161	14.743	10.7767	8.18546	4.61477	3.26346	2.88036	4.2133	6.66273	10.0461	10.7271	14.5153	15.5426	17.4224	14.3472	19.2162	16.39	17.1851	13.9986	15.9017	15.8673
24	6.85721	4.33593	3.53806	2.71435	4.86051	5.95124	9.13957	11.3894	15.1588	18.4702	21.6012	22.6479	26.3181	26.9754	23.3797	21.646	17.0325	14.8514	11.2013	8.30028	4.74619	1.32531	0	1.32681	4.62477	8.16297	10.9819	13.7025	11.7321	12.4993	8.68206	6.79905	3.76036	4.29937	4.89639	6.96219	9.91197	13.3947	14.3461	18.0935	18.8588	20.5393	17.0662	22.1844	18.9967	19.2466	15.7286	17.3726	17.4058
25	4.09728	3.28426	4.45204	3.56228	6.79631	8.86326	12.0831	13.704	18.0216	21.3172	24.2832	24.8018	28.742	29.7902	26.1968	24.6819	19.669	18.0739	14.4445	11.7537	8.25086	4.66549	1.32681	0	1.32686	4.60184	7.76182	10.1807	8.30089	8.56445	4.74818	3.40804	2.67976	5.17538	6.82083	9.86371	13.009	16.4938	17.8205	21.4169	21.8597	23.3235	19.5093	24.789	21.2159	21.0195	17.2467	17.7631	18.432
26	3.38152	2.77717	5.0354	3.78041	8.30384	10.8919	13.9882	15.3625	19.8171	23.1258	25.9619	26.3577	30.3614	31.7318	28.2561	26.9813	21.5687	20.6576	16.9135	14.7238	11.2244	7.88691	4.62477	1.32686	0	1.32882	4.08655	6.65597	6.90457	7.15568	3.49607	3.83856	4.73446	7.28145	9.78758	12.5457	16.1822	19.571	20.8077	24.4193	24.8307	26.2524	21.8772	27.2278	23.1179	22.8679	19.1438	19.3261	19.7698
27	4.32003	4.94314	7.44066	6.45268	11.5066	13.8833	16.9483	17.7169	22.4304	25.6327	28.2431	28.1918	32.3387	33.9254	30.686	29.665	23.9505	23.6447	19.9705	18.065	14.6529	11.3358	8.16297	4.60184	1.32882	0	1.34588	3.1455	3.27172	3.24667	2.91367	4.87005	6.39643	9.73489	12.7125	15.5575	19.3591	22.6621	24.1359	27.5883	27.7609	28.9832	24.2719	29.6539	25.1811	24.6623	20.9507	20.7742	21.3315
28	5.9726	3.73244	8.39839	8.69162	12.9513	15.7318	18.4331	19.5418	23.6819	26.8728	29.4191	29.7226	33.7352	35.2349	32.421	31.563	25.727	25.8618	22.0444	20.4978	16.8439	14.1221	10.9819	7.76182	4.08655	1.34588	0	1.33369	3.33631	3.21826	4.95199	7.07915	9.3454	12.6596	15.6946	17.9859	22.1922	25.3965	26.4666	30.1214	30.4021	31.5457	26.5813	31.9181	27.1046	26.6594	23.0725	22.4665	22.7023
29	8.20329	7.74458	11.766	11.4407	16.3059	18.6358	21.5585	21.997	26.6589	29.7403	32.1038	31.8059	35.9485	37.6573	34.8573	34.1271	28.147	28.5082	24.8511	23.3348	19.8847	16.8253	13.7025	10.1807	6.65597	3.1455	1.33369	0	1.33281	3.4492	5.85778	8.69716	11.4289	14.9052	18.0593	20.5573	24.7039	27.8966	29.3426	32.7414	32.8319	33.8635	28.8199	34.1539	29.2492	28.597	25.0305	24.1617	24.6425
30	7.34882	9.66552	12.3318	11.2169	16.5185	18.3615	21.5766	21.0652	26.4341	29.2247	31.1528	29.5595	34.0877	36.1093	33.407	32.9807	26.8755	27.1967	23.7315	21.64	18.4299	14.7161	11.7321	8.30089	6.90457	3.27172	3.33631	1.33281	0	1.32764	3.2132	6.17827	8.27801	12.0337	14.9986	18.5238	22.0115	25.2643	27.6414	30.6186	30.1095	30.9267	26.511	31.7521	26.8739	25.545	22.0482	20.7592	21.9631
31	10.1708	10.0584	13.1774	9.75089	15.5926	16.1591	19.2546	17.7141	23.1768	25.7981	27.63	26.0521	30.5373	32.5551	29.9423	29.6086	23.4379	24.6654	21.2142	20.5659	17.8608	14.743	12.4993	8.56445	7.15568	3.24667	3.21826	3.4492	1.32764	0	1.32714	4.42905	8.0236	11.1346	14.4876	16.8813	21.0369	23.8122	26.2782	28.8341	28.1296	28.6414	23.3318	28.5385	23.495	22.3079	18.8709	17.506	18.4868
32	7.04142	7.32739	9.56746	6.50047	12.2662	13.5667	16.7616	16.1552	21.5033	24.4018	26.6374	25.6616	30.08	31.9047	28.8225	28.0969	22.1734	22.5226	19.1325	17.4922	14.596	10.7767	8.68206	4.74818	3.49607	2.91367	4.95199	5.85778	3.2132	1.32714	0	1.3278	3.58114	7.83863	9.84443	13.9383	17.4004	20.404	23.4596	25.9604	24.8755	25.3694	21.4948	26.6747	22.6464	21.4057	17.7215	16.014	18.4092
33	8.04574	7.22585	8.82598	4.13674	9.24191	8.51594	11.5867	10.5634	15.7842	18.6679	20.9463	20.3679	24.5574	26.3292	23.3792	22.671	16.67	17.3378	14.0607	13.2655	10.8118	8.18546	6.79905	3.40804	3.83856	4.87005	7.07915	8.69716	6.17827	4.42905	1.3278	0	1.32702	4.531	7.89956	9.49154	14.298	17.0538	18.8984	21.7409	21.6291	22.5359	17.3508	22.6459	17.7811	17.4761	13.9505	13.3684	13.3751
34	7.73213	6.92647	7.28101	3.43468	7.46069	7.61244	10.8505	11.0129	15.9962	19.0804	21.7563	21.4429	25.6871	27.1888	23.5514	22.3748	17.0102	16.2139	12.8296	10.7739	7.82641	4.61477	3.76036	2.67976	4.73446	6.39643	9.3454	11.4289	8.27801	8.0236	3.58114	1.32702	0	1.32507	4.50583	7.87312	11.3598	14.5558	16.7634	19.7702	19.528	20.6753	16.2958	21.6726	17.8025	17.2584	13.4706	14.3151	15.0114
35	10.8677	9.07255	8.73313	4.61752	5.88697	3.79128	6.73874	5.94101	10.9803	13.989	16.6625	17.0913	20.9617	22.2261	18.697	17.527	12.0313	11.64	8.2614	6.39504	4.2184	3.26346	4.29937	5.17538	7.28145	9.73489	12.6596	14.9052	12.0337	11.1346	7.83863	4.531	1.32507	0	1.32583	3.36457	7.49886	10.6059	12.2602	15.4056	15.6798	16.6523	12.4748	17.8069	13.7987	13.728	9.98172	11.4744	11.6859
36	13.0857	10.9332	10.2141	6.91889	7.66082	6.21679	8.15527	8.66764	12.5444	15.3196	18.059	18.2604	22.0325	22.6699	18.8985	17.1849	12.962	10.6504	7.48536	4.35101	3.28118	2.88036	4.89639	6.82083	9.78758	12.7125	15.6946	18.0593	14.9986	14.4876	9.84443	7.89956	4.50583	1.32583	0	1.33077	4.57006	7.92934	10.31	13.2462	13.1805	14.5958	11.5345	16.5536	14.096	14.1688	10.8403	12.5844	13.5001
37	16.2607	13.1521	11.5109	7.26225	6.69094	3.50499	4.97331	3.27606	7.85982	10.3594	12.9313	13.4572	17.1123	18.0345	14.3741	13.0676	7.96226	7.31565	4.13458	3.14713	3.85524	4.2133	6.96219	9.86371	12.5457	15.5575	17.9859	20.5573	18.5238	16.8813	13.9383	9.49154	7.87312	3.36457	1.33077	0	1.32957	4.23196	7.28429	9.69122	9.11803	10.4595	8.0068	12.68	9.79583	10.8255	8.04694	10.2839	9.40793
38	19.3595	16.6573	14.8712	10.9343	10.4366	7.07288	7.87364	7.09657	9.32292	11.0479	13.8013	14.8737	18.0338	17.2997	13.7939	11.2548	8.34631	4.29049	3.17114	2.78285	4.87458	6.66273	9.91197	13.009	16.1822	19.3591	22.1922	24.7039	22.0115	21.0369	17.4004	14.298	11.3598	7.49886	4.57006	1.32957	0	1.32921	3.6334	6.21287	6.83033	8.71567	7.16625	11.6721	10.9188	12.5362	9.96074	12.6086	13.5829
39	22.8751	20.0767	18.194	14.2313	13.1647	9.25322	9.29719	7.50955	9.72212	9.98767	11.7266	11.7062	14.6836	13.6058	10.182	7.28938	6.05038	3.35203	3.79587	5.06804	7.58154	10.0461	13.3947	16.4938	19.571	22.6621	25.3965	27.8966	25.2643	23.8122	20.404	17.0538	14.5558	10.6059	7.92934	4.23196	1.32921	0	1.32658	3.10888	2.623	4.87341	4.17977	7.71441	8.5578	10.7192	8.87168	11.6816	12.8649
40	23.4548	20.6178	18.0742	14.1896	11.8786	8.27974	5.73483	6.70882	6.87476	8.9961	11.676	13.2307	16.4077	13.9333	11.4239	8.25941	6.00576	2.88673	4.42472	3.81271	7.27135	10.7271	14.3461	17.8205	20.8077	24.1359	26.4666	29.3426	27.6414	26.2782	23.4596	18.8984	16.7634	12.2602	10.31	7.28429	3.6334	1.32658	0	1.33202	3.79087	7.23292	6.75469	10.6099	10.7006	13.5869	11.914	14.5333	15.0699
41	27.5579	24.5949	22.2996	18.3484	16.5077	12.3257	9.45948	7.20977	6.6956	5.26415	7.04818	8.94614	11.8434	8.25702	6.55576	3.28966	3.66624	3.38208	6.1176	7.99082	11.3001	14.5153	18.0935	21.4169	24.4193	27.5883	30.1214	32.7414	30.6186	28.8341	25.9604	21.7409	19.7702	15.4056	13.2462	9.69122	6.21287	3.10888	1.33202	0	1.33242	4.02217	5.6879	7.26737	9.31579	12.8161	12.4125	15.0039	14.6943
42	28.2547	25.4787	23.6255	19.6811	18.2741	14.1663	12.7446	10.5225	12.0269	11.2668	12.7939	11.9059	14.7588	13.7363	9.57786	7.63428	7.09653	6.14557	7.27068	9.81322	12.9138	15.5426	18.8588	21.8597	24.8307	27.7609	30.4021	32.8319	30.1095	28.1296	24.8755	21.6291	19.528	15.6798	13.1805	9.11803	6.83033	2.623	3.79087	1.33242	0	1.33213	3.53201	6.49853	8.68685	10.8097	9.5969	12.4651	13.5305
43	29.6596	27.1366	25.5207	21.4921	20.2721	16.2538	15.4835	12.0518	13.1792	11.1181	11.9295	10.0508	12.7527	12.0237	7.34312	6.93906	7.06034	8.29914	8.46744	11.9741	14.9462	17.4224	20.5393	23.3235	26.2524	28.9832	31.5457	33.8635	30.9267	28.6414	25.3694	22.5359	20.6753	16.6523	14.5958	10.4595	8.71567	4.87341	7.23292	4.02217	1.33213	0	1.33441	3.77439	6.19679	8.74159	8.33731	11.212	12.1806
44	25.7709	23.0214	21.6759	17.1895	16.5203	12.6208	11.373	8.04264	9.43936	8.65386	9.62481	7.57355	11.0017	11.4286	7.07082	6.57156	4.2027	5.47519	4.28373	8.97696	12.0592	14.3472	17.0662	19.5093	21.8772	24.2719	26.5813	28.8199	26.511	23.3318	21.4948	17.3508	16.2958	12.4748	11.5345	8.0068	7.16625	4.17977	6.75469	5.6879	3.53201	1.33441	0	1.32863	3.13682	4.89332	4.06633	6.39126	7.09837
45	31.1011	28.2731	26.7452	22.3102	21.2823	17.4078	15.7752	12.1257	11.713	8.57702	7.53615	4.77201	7.22438	7.57385	3.65325	5.6191	5.99029	8.84349	8.90521	13.7477	16.9009	19.2162	22.1844	24.789	27.2278	29.6539	31.9181	34.1539	31.7521	28.5385	26.6747	22.6459	21.6726	17.8069	16.5536	12.68	11.6721	7.71441	10.6099	7.26737	6.49853	3.77439	1.32863	0	1.32853	4.74648	7.15983	9.63105	8.12476
46	27.2749	24.336	23.0485	18.3194	17.5849	13.2172	11.8851	7.57039	8.6975	7.16827	6.19848	3.38362	7.1619	8.93096	5.62945	6.4378	3.63283	7.29023	6.04166	11.5723	14.3723	16.39	18.9967	21.2159	23.1179	25.1811	27.1046	29.2492	26.8739	23.495	22.6464	17.7811	17.8025	13.7987	14.096	9.79583	10.9188	8.5578	10.7006	9.31579	8.68685	6.19679	3.13682	1.32853	0	1.33122	3.25579	5.85674	3.87585
47	26.8913	24.4431	23.6207	18.9059	19.1594	14.7566	14.7523	10.5537	13.0892	12.2842	11.1452	6.52326	10.8331	13.2286	10.8459	11.7136	8.59014	11.5701	8.74983	13.9613	16.0497	17.1851	19.2466	21.0195	22.8679	24.6623	26.6594	28.597	25.545	22.3079	21.4057	17.4761	17.2584	13.728	14.1688	10.8255	12.5362	10.7192	13.5869	12.8161	10.8097	8.74159	4.89332	4.74648	1.33122	0	1.34294	3.07371	3.20306
48	23.1087	20.8071	20.1646	15.5402	16.2362	12.0401	12.9169	8.37473	12.5946	13.0433	12.8218	8.98266	13.3573	15.4388	12.4644	12.4266	8.91758	11.0143	6.99935	12.0482	13.4348	13.9986	15.7286	17.2467	19.1438	20.9507	23.0725	25.0305	22.0482	18.8709	17.7215	13.9505	13.4706	9.98172	10.8403	8.04694	9.96074	8.87168	11.914	12.4125	9.5969	8.33731	4.06633	7.15983	3.25579	1.34294	0	1.3326	3.15366
49	23.609	21.4773	21.2363	16.5714	17.8039	13.4471	14.8237	9.91581	14.3461	14.3697	13.4021	9.53081	14.4561	16.8792	14.2105	14.4714	10.4794	13.1653	9.03793	14.1308	15.5728	15.9017	17.3726	17.7631	19.3261	20.7742	22.4665	24.1617	20.7592	17.506	16.014	13.3684	14.3151	11.4744	12.5844	10.2839	12.6086	11.6816	14.5333	15.0039	12.4651	11.212	6.39126	9.63105	5.85674	3.07371	1.3326	0	1.32866
50	24.2747	21.567	20.9409	16.0918	16.6149	12.0826	12.8104	8.13068	11.5093	10.4912	8.11211	3.66538	8.48358	11.0862	9.92639	11.6594	7.1942	12.1675	9.35233	13.7575	15.2151	15.8673	17.4058	18.432	19.7698	21.3315	22.7023	24.6425	21.9631	18.4868	18.4092	13.3751	15.0114	11.6859	13.5001	9.40793	13.5829	12.8649	15.0699	14.6943	13.5305	12.1806	7.09837	8.12476	3.87585	3.20306	3.15366	1.32866	0
51	20.0152	17.2086	16.5033	11.6702	12.4728	8.05593	8.93249	4.69038	7.62921	7.82582	8.24247	6.81293	10.9527	12.7636	9.68728	9.39394	4.01651	7.13208	3.95435	8.85049	11.059	11.7097	13.0114	14.1673	15.661	17.426	19.1809	21.2748	19.0955	15.6586	14.8432	9.8891	10.8313	7.17596	9.78573	5.7534	8.81683	8.00786	9.78034	10.3646	9.68472	9.66363	4.15926	8.64306	3.95933	4.5653	3.15583	3.07933	1.3298
52	17.8752	15.4884	15.4025	10.793	12.6059	8.89476	11.6346	6.98553	12.1834	13.2256	13.506	10.8644	15.6358	17.8066	15.1397	15.3561	9.55182	12.6033	8.75102	12.5829	12.5187	11.5019	12.3535	12.0916	13.3349	14.8225	16.4159	18.3097	15.7758	12.3239	11.8701	7.12876	9.11149	6.89568	9.50775	7.51975	11.9975	12.5726	14.9035	16.3745	14.7284	14.3777	8.58798	13.273	7.95217	6.92049	4.04015	3.33675	3.51923
53	19.829	16.9447	16.5836	12.0687	13.0047	9.24162	11.0681	7.10103	12.0247	12.8982	11.867	9.3774	13.7982	16.1938	14.8683	15.9569	9.83967	14.3187	10.9606	13.9859	14.0968	13.6039	14.3892	14.2749	15.0102	16.3364	16.9701	19.0681	16.7954	13.247	13.4822	8.03958	11.3765	8.55752	11.5426	8.81173	13.8853	14.8311	17.0307	18.0788	17.3012	16.9273	11.2129	14.1882	8.80067	8.41944	6.79725	4.65969	2.74714
54	17.8822	14.6397	13.6322	8.92191	9.2154	5.32662	6.92846	3.53332	7.17142	8.73683	10.1868	9.27968	13.2173	15.1191	13.0547	13.0017	6.73271	10.1852	8.03394	10.5595	10.6923	10.5967	11.6183	12.644	13.5195	15.2869	16.5309	18.8626	17.9256	14.4346	13.5143	7.68027	9.98984	5.79289	10.1107	6.13187	11.9067	12.6528	13.7123	13.9549	15.2098	15.5797	9.96218	14.0586	8.24281	9.28077	7.7376	6.71557	4.29898
55	14.6229	11.4455	10.7937	6.04008	7.69276	4.72338	7.70468	3.79148	9.58107	11.6791	13.4336	12.3131	16.801	18.6003	15.1052	14.5658	9.10005	10.3237	5.96391	8.3653	8.37842	7.78993	8.34584	9.04503	10.2073	12.128	13.8958	16.274	15.3439	12.0571	10.4287	4.76584	6.2978	2.80691	5.68903	3.36443	7.50171	9.13927	11.8959	13.9006	12.4476	12.6934	7.33677	12.661	8.40102	7.80742	4.19337	6.23137	6.30065
58	14.9434	11.1815	10.8621	7.44154	7.98647	6.38116	8.91076	6.28313	11.7857	14.2947	16.2107	15.47	19.6648	21.4231	18.5498	18.142	11.9447	13.6541	10.5332	11.539	10.4777	9.66415	10.0952	9.47451	10.207	11.7222	12.4254	15.0102	13.6409	10.1844	9.44199	3.73274	7.29118	4.58811	8.41438	6.86302	12.1244	14.0647	16.179	18.1973	17.8991	18.4815	12.9604	18.0641	12.8784	12.8488	9.65463	9.0146	8.87539
59	11.4931	8.19832	6.75455	3.47004	3.73347	4.04986	6.33987	7.46089	11.4309	14.7083	17.4511	18.6614	22.1911	23.4466	20.2721	19.2484	13.5962	13.7469	10.0746	9.93888	7.21023	6.85998	7.35678	8.02045	7.56525	8.55819	8.25399	10.5814	10.6271	7.92142	7.62193	3.42862	6.31041	4.0167	8.3649	6.55401	12.1158	14.6325	15.1257	18.3914	19.2755	20.5771	15.7217	20.7419	16.1361	16.8844	13.7745	13.7558	12.6607
60	13.3078	8.08008	11.4955	8.47003	10.9745	10.6351	13.207	12.2033	15.9709	17.6725	18.2526	17.8318	21.2884	23.1546	21.9987	22.5483	16.2426	19.7583	16.577	16.9729	14.4831	13.4549	12.8822	10.9493	9.70002	9.08757	7.25249	9.63325	10.3754	8.08556	9.04882	5.27043	10.5916	10.1782	14.1592	13.076	18.7808	21.0793	21.9667	23.826	24.698	24.9926	19.236	23.3295	17.4492	17.6532	15.682	13.5878	11.9174
61	10.5046	4.64035	8.87175	7.45611	8.97862	10.3559	12.1057	13.2047	16.1784	19.1836	21.6562	23.363	26.4569	27.6287	25.2458	24.5375	18.9271	19.5498	16.1442	16.3814	13.3518	12.5568	11.6797	9.80861	7.56894	6.22662	3.75239	6.64529	8.61766	7.09663	7.6266	6.53876	10.5599	10.6179	14.3982	13.3843	18.9085	21.436	21.2898	24.0409	25.9058	27.1473	22.0443	26.8646	21.7977	22.445	19.4819	18.7678	17.7969
62	6.18738	3.3806	5.39325	3.75576	7.67254	9.49312	12.2027	13.3114	17.3804	20.6061	23.2623	24.0088	27.7953	29.1819	26.1843	25.2286	19.4883	19.5793	15.7901	14.8193	11.4201	9.56607	7.39325	5.34317	3.4673	3.74794	3.94679	6.2796	5.48435	3.17194	3.7744	4.20303	6.9057	8.50377	11.3315	11.9855	16.8583	19.8364	20.561	24.1215	24.7688	26.0605	21.1376	26.3378	21.554	21.575	18.1599	17.8035	17.5126
63	11.8635	8.07325	12.8746	9.70482	14.7059	15.3162	18.105	17.4197	22.0554	24.7983	26.7538	26.2588	30.2677	32.0541	29.7472	29.4208	23.2136	24.6414	21.2844	20.7757	17.8523	15.544	13.5886	10.3085	8.16496	6.06833	3.8491	5.9518	6.14943	4.24868	5.86251	6.87071	10.3356	13.0628	16.1458	17.09	22.1522	24.8795	26.3749	29.2768	29.3113	30.0417	24.5659	29.6806	24.2971	23.8477	20.628	19.2523	19.1904
64	12.8702	10.6401	15.5633	12.7296	18.0224	18.6685	21.5502	20.4924	25.3534	27.9732	29.7345	28.6777	32.8307	34.7669	32.6081	32.4336	26.1571	27.794	24.554	23.9379	21.0783	18.429	16.2262	12.584	10.1445	6.04275	3.5182	3.55139	3.66942	3.34662	5.87488	9.05051	12.448	15.4856	18.7438	20.186	25.023	27.7519	29.5876	32.4032	32.0764	32.6339	27.1033	32.1907	26.7632	25.9539	22.773	21.0463	21.3495
65	15.5451	11.84	17.6856	15.0703	19.2061	19.2895	21.7403	20.7513	24.5486	26.6951	27.7399	27.3744	30.8575	32.6692	31.4228	31.7084	25.5185	28.2485	25.2377	25.4002	22.6631	20.8793	19.1768	15.7578	12.8491	9.21883	5.76029	7.07173	8.05	7.12893	9.49455	11.5335	15.861	18.1176	21.3916	21.4426	26.9047	29.3116	30.6011	32.4319	33.3222	33.6999	27.94	32.4936	26.6478	26.4446	23.9689	21.7544	20.9481
66	18.9604	15.6016	21.4335	19.3144	24.214	24.587	27.3979	26.0378	30.4548	32.7435	33.7586	32.8178	36.6711	38.6652	37.2334	37.4673	31.1715	33.5803	30.5143	30.4175	27.5689	25.1487	22.871	19.3098	16.4218	12.6566	9.16177	9.61019	10.9635	10.3419	12.7491	15.8539	19.2902	22.314	25.5486	26.4341	31.6151	34.1057	35.7959	38.0036	38.0846	38.4028	32.6621	37.3938	31.6887	30.9036	28.1711	25.8146	25.8008
67	20.2274	17.1904	23.1653	22.0839	26.9573	28.057	30.7762	29.884	34.3841	36.863	38.1856	37.217	41.1603	43.1403	41.5137	41.5886	35.2906	37.3028	34.0448	33.5513	30.4935	27.9075	25.348	21.772	18.5689	14.6254	11.1097	10.5973	12.622	12.5849	15.1366	18.4816	21.9503	25.1669	28.4573	29.8471	34.7861	37.5064	39.1785	41.8519	41.7466	42.187	36.5424	41.4647	35.836	34.9423	32.0196	29.8197	30.0443
68	21.9153	17.8813	24.2507	23.3737	27.4852	28.7798	31.1925	30.8702	34.7029	37.1861	38.7059	38.3604	41.9076	43.6783	42.2666	42.3212	36.1587	38.1901	34.8209	34.6173	31.4022	29.347	26.8747	23.5942	20.2155	16.5402	12.9363	12.7983	14.7866	14.8938	17.4372	20.67	24.0193	27.1929	30.3723	31.0567	36.339	39.0122	40.0602	42.5908	43.3017	43.9	38.2374	43.0664	37.3339	36.9008	34.0956	31.9651	31.6547
69	18.3009	14.0705	20.4208	19.4358	23.5959	25.0064	27.4272	27.2404	31.1713	33.7761	35.3573	34.9577	38.4926	40.2984	38.9541	38.8646	32.7025	34.4926	31.0582	30.7382	27.4933	25.4082	22.9463	19.6988	16.3896	13.1858	9.60234	10.6607	12.221	12.0776	14.368	17.2551	20.3679	23.3979	26.4921	27.2479	32.4749	35.2041	36.2437	38.9593	39.5978	40.2887	34.6938	39.6186	33.9763	33.5938	30.6587	28.7458	28.3131
70	17.5387	12.0908	18.6482	17.5304	21.1382	22.3274	24.5747	24.6337	27.9939	30.4943	32.1805	32.4617	35.7579	37.3388	35.8714	35.8263	29.8138	31.7766	28.3397	28.2988	25.0927	23.4733	21.3161	18.3803	15.3402	12.7916	9.39907	11.0257	12.8945	12.1092	14.1162	15.4799	19.1729	21.5943	24.7481	24.8542	30.3013	32.9162	33.5877	36.0539	37.2593	38.0384	32.4789	37.2363	31.5414	31.5742	28.7876	27.0461	26.1916
71	13.6189	8.33096	14.0527	11.9002	16.0731	16.8153	19.3415	19.0564	22.8876	25.5263	27.4063	27.6828	31.2277	32.7881	30.9655	30.7548	24.6478	26.2731	22.8617	22.6811	19.6362	17.8284	15.917	13.0359	10.4607	8.49083	5.82735	8.03756	9.48609	7.55284	9.11067	9.44735	13.3841	15.6226	18.8125	19.0781	24.4423	27.0767	28.089	30.7633	31.455	32.2348	26.7145	31.6803	26.1545	26.0156	23.0042	21.518	20.9919
72	17.0782	10.647	16.0186	15.3127	17.2272	18.4113	20.0357	20.665	23.3858	25.9314	27.8314	28.8085	31.8615	33.2385	31.7099	31.5253	25.762	27.3035	24.1988	24.6657	21.6442	20.8089	19.3016	17.2061	14.824	12.9492	9.66353	12.0168	13.9568	12.2803	14.0424	13.464	18.0374	18.6209	22.4112	21.3658	27.0578	29.4172	29.4433	31.4929	33.6005	34.5109	29.0979	33.6866	28.1288	28.4957	25.9157	24.096	22.9901
73	14.1638	7.65026	12.3604	12.0883	13.7881	14.929	16.7901	16.9244	19.7186	22.0063	23.4941	24.0844	27.0297	28.5132	27.3318	27.4593	21.597	23.9718	20.7798	21.2755	18.221	17.4971	15.9803	14.3965	12.2908	11.5358	8.50081	11.6359	13.6547	11.45	12.7511	10.1551	14.991	15.0448	18.9596	17.7929	23.5223	25.841	26.124	27.831	29.866	30.5773	25.0756	29.358	23.6929	24.252	22.0358	20.2919	18.6388
74	10.083	4.08467	10.6558	10.9992	13.9127	16.2692	18.1975	19.0183	22.1275	24.9568	27.1277	28.2411	31.4605	32.8092	30.802	30.346	24.5371	25.6587	22.186	22.0657	18.3637	16.8177	14.0418	11.9019	8.69645	7.66181	4.09736	6.62593	9.34815	9.45567	10.3767	11.247	13.9245	16.1533	19.0383	19.0932	24.4959	27.1793	27.3345	30.0816	31.671	32.7417	27.4474	32.2799	26.9074	27.3509	24.4532	23.3924	22.2982
75	14.5286	8.19014	14.139	14.1663	16.62	18.5986	20.2864	21.4735	24.3528	27.212	29.4455	30.8572	33.9264	35.1795	33.2232	32.7065	27.0326	27.7979	24.4291	24.352	20.9268	19.9592	17.7313	15.7519	12.9465	11.8944	8.44057	11.2985	13.8579	13.155	14.2484	13.9605	17.3628	18.6564	21.9743	21.5323	26.9225	29.5795	29.4572	32.3309	34.1551	35.3236	30.1115	34.9181	29.5962	30.1271	27.2342	26.2149	25.0693
76	16.1459	9.71378	13.9044	14.6705	15.3225	17.5617	18.6204	20.1601	22.2195	24.8172	26.9151	29.1188	31.5906	32.5786	30.9984	30.5748	25.2938	25.6024	22.9362	23.2585	19.9746	19.6558	18.1895	17.2333	14.7659	14.2465	10.8072	13.9688	16.527	15.5897	16.3049	15.1837	18.6642	18.7269	22.4264	20.9648	26.3158	28.7269	27.7444	30.0776	33.1635	34.3668	29.2991	33.6355	28.4129	29.5034	27.0324	26.1206	24.3118
77	10.8192	4.8345	9.57099	10.4723	11.7343	13.9696	15.6052	17.767	20.2722	23.4006	26.0872	28.3721	31.2286	32.201	29.7844	28.8516	23.5967	23.1424	19.9615	19.7356	16.1931	15.6307	13.8325	13.0542	10.2814	10.8544	7.41186	11.1859	13.9303	13.942	13.2696	12.5509	14.6358	15.1896	18.4861	17.6201	22.7209	25.3926	24.661	27.9481	30.1435	31.6497	26.8842	31.6387	26.752	27.7401	24.8099	24.5488	23.2006
78	15.1881	9.17337	13.4056	14.9363	15.7732	18.0417	19.5201	21.889	23.8976	26.898	29.5239	32.2487	34.772	35.5835	33.4327	32.5194	27.5272	26.5832	23.9428	23.8394	20.2904	19.9247	17.9307	17.274	14.7725	15.2647	11.74	15.3328	18.1063	17.8455	17.5482	17.0549	19.1909	19.7669	23.0292	22.0197	27.0298	29.6321	28.4523	31.552	34.3213	35.8972	31.223	35.8174	30.8777	32.1012	29.2988	28.9465	27.4084
79	17.8944	11.8582	15.8123	17.2835	17.6044	19.839	20.6579	22.5614	23.6311	26.4718	28.6683	31.5589	33.6834	34.369	32.8855	32.3164	27.5416	27.2928	25.108	25.5453	22.2063	22.0529	20.3867	19.8263	17.4256	17.705	14.1168	17.1175	19.8526	19.5015	20.0059	19.0525	21.5185	21.6911	25.2025	23.7104	28.86	31.2223	29.7442	31.5173	35.3884	36.7659	32.0094	35.966	31.0079	32.5994	30.2648	29.6144	27.555
80	19.7796	13.7083	16.1282	17.0657	15.49	17.3944	17.2483	19.4997	19.688	22.7199	24.9904	28.0508	30.2838	30.751	29.2333	28.5628	24.1948	23.5469	21.7879	22.3962	20.1995	20.6813	20.4769	20.4474	18.9244	19.6309	16.3747	20.131	22.642	21.354	20.9816	18.3771	21.0517	19.7399	23.8478	21.055	26.2561	28.132	26.2921	27.5752	32.0625	33.5175	29.0555	32.5986	27.9154	30.0148	27.9108	27.6069	25.2457
81	18.144	12.0832	14.5972	15.198	14.4428	16.4112	16.6395	18.3601	19.5151	22.1497	24.2396	27.0675	29.1678	29.9107	28.4581	28.0032	23.1395	23.5465	21.1963	21.8504	19.208	19.3577	18.8315	18.4589	16.9939	17.5551	14.3987	18.1317	20.5458	19.0651	18.7556	16.0083	19.1049	18.1612	22.253	19.8693	25.2664	27.3295	25.9742	27.42	31.2977	32.5445	27.7297	31.5159	26.5688	28.2462	26.0729	25.4317	23.2
82	15.2177	9.52754	12.144	10.5802	11.3829	11.7089	13.0528	13.7638	15.8148	18.2427	20.2755	22.3522	25.0622	25.9716	24.4731	24.0869	18.9486	19.9802	17.422	18.1979	15.6096	15.0707	14.8569	13.4775	12.2243	12.736	10.677	13.83	15.0995	12.8343	12.7102	8.69751	13.2388	12.3179	16.599	14.7233	20.5339	22.684	22.7777	23.6861	26.7421	27.6854	22.3702	26.9389	21.5285	22.3235	19.7592	18.8131	17.1773
83	20.8858	15.0702	16.595	15.1734	13.7667	13.3205	12.0376	13.4057	13.0945	15.2964	16.8067	19.6155	21.5123	22.1228	21.1879	21.0602	16.5302	18.2235	16.7875	18.5068	17.8902	18.6001	19.2798	19.4081	18.5977	19.4007	16.9083	20.3297	21.5525	19.0985	19.2324	14.1336	18.3947	15.7805	20.541	16.5076	21.523	22.7143	21.6271	20.9821	25.8153	26.7275	22.113	24.6719	20.1751	22.545	21.1255	20.1582	17.4566
84	20.8948	15.6762	16.8697	14.2941	13.713	12.0975	11.2062	11.4347	11.4624	13.4267	14.6707	16.8137	18.6957	19.7099	18.8932	19.2218	13.9082	17.0232	15.6163	17.6197	17.383	17.6246	18.1502	17.4426	16.9602	17.8488	16.7165	19.1392	18.9473	15.7746	16.5082	10.8471	16.05	13.3932	18.0319	14.8297	20.0828	20.9806	20.6392	19.7574	23.7359	24.2816	19.3141	21.9196	17.1903	18.4657	16.8456	15.2119	12.8153
85	24.1322	18.9541	19.7619	17.0099	15.9961	14.1724	13.3911	13.0185	12.3931	13.9634	14.6625	16.1218	17.8236	19.0714	19.0307	19.5749	14.4957	18.3824	17.5628	19.676	19.523	19.9898	20.8808	21.0306	20.5933	21.6295	20.173	22.9844	23.2364	20.1915	20.6773	14.9229	19.4656	16.1654	20.9356	16.7762	21.9044	22.5267	22.1707	20.409	24.8693	25.1294	20.0812	21.958	17.4674	19.0343	18.4063	16.8546	13.7182
86	20.746	16.7697	17.3683	13.4835	14.0371	10.8587	11.7391	8.8388	11.6934	12.381	11.5365	12.5903	14.2597	15.6994	16.1898	17.4059	11.23	15.6665	13.3665	15.9676	16.3312	16.1454	16.7446	16.0862	16.1206	17.183	16.9181	19.1018	17.9166	14.3989	15.0805	9.21078	14.2461	11.164	15.2564	11.3944	17.1296	17.8878	19.2082	19.2511	20.1593	20.0462	14.349	18.0767	12.2517	12.7417	11.3118	9.44433	6.99373
87	28.5221	23.9679	24.4906	20.7472	20.2085	17.0407	16.2741	14.1021	13.8604	14.3399	12.6501	12.8552	13.9477	16.0967	17.3758	18.9098	13.8508	19.4024	18.2921	21.5004	22.525	23.048	24.0725	24.1498	24.173	25.2258	24.5161	26.6977	25.643	22.228	23.2403	17.3976	22.1065	18.4244	22.7458	17.9508	23.1417	23.1105	23.6626	21.2557	24.3074	23.5834	18.6525	19.416	15.2624	16.2321	16.6783	14.3885	10.8012
88	25.0014	21.4521	21.2932	16.9143	17.0449	13.2253	13.4202	10.4641	11.9668	12.4404	10.8327	9.26362	10.8448	13.9146	14.7134	16.2181	10.178	15.8106	13.745	17.4921	18.4089	18.7469	19.6987	19.7673	20.2394	21.4634	21.5438	23.6599	21.8301	18.2773	18.9788	13.2068	17.4308	13.7831	17.6649	13.198	18.7219	18.2438	19.7133	18.7227	19.5354	18.7623	13.4241	15.4251	10.315	10.759	10.8449	8.54335	5.5617
89	31.8892	28.0938	28.327	23.9668	23.9583	20.038	19.6308	16.1002	16.3816	16.1179	13.1698	11.7739	12.1847	15.8745	17.4581	19.5475	14.5512	20.4205	19.0507	23.3829	24.8491	25.5751	26.6391	26.5837	27.0157	28.0118	27.7199	29.7005	27.3823	23.9928	25.2944	19.858	24.1806	20.6588	24.2126	19.465	24.3002	23.3493	24.8326	22.5441	24.1392	22.7272	18.2306	17.5139	14.3323	14.5535	15.9965	13.0793	9.01455
90	27.6211	24.8464	24.3091	19.5182	19.8153	15.4584	15.5994	11.5042	13.0738	12.8828	10.4014	7.86406	9.96496	13.6074	14.0113	15.7415	10.0925	15.7001	13.585	18.0902	19.5862	20.2797	21.5567	21.9501	22.8867	24.2083	24.813	26.7798	24.1031	20.6116	21.2467	15.9507	19.0359	15.561	18.5069	13.9009	18.5819	17.6302	19.4585	18.6235	18.5672	17.4275	12.2936	13.3287	8.99231	8.92332	9.67211	7.20034	3.34562
91	35.1316	32.6049	32.4676	27.7434	28.1953	23.8608	23.8264	19.5368	20.339	19.2418	15.623	12.4745	12.5005	17.1886	18.754	20.9586	16.9114	22.5997	21.046	26.0324	27.7814	28.4927	29.6836	29.5544	30.3751	31.2919	31.3985	33.1113	29.2446	26.3396	27.6603	23.3167	26.7031	23.7692	26.2816	22.0431	25.9811	24.3673	26.5137	24.7975	24.4726	22.5558	18.5736	16.5747	14.234	13.209	16.031	13.4356	9.57702
92	36.1067	33.5162	32.9328	28.0784	28.1947	23.6588	23.1979	18.5261	19.0156	17.0983	13.3282	9.81056	8.75198	13.9373	14.6342	17.811	14.7589	20.3276	19.273	24.6127	26.8246	27.9904	29.6641	30.3275	31.4758	32.7707	33.4252	35.2595	31.9567	28.6463	29.5165	24.6387	27.1192	23.8006	25.6377	21.2665	23.9907	21.5288	24.0517	21.9091	21.0372	18.5982	15.6061	11.8492	10.5005	10.5232	13.6121	12.9274	8.72729
93	37.489	34.5135	33.65	28.94	28.469	24.1809	22.9565	18.6622	17.991	16.049	12.0521	10.5569	7.74245	12.3145	14.5301	17.2566	14.7786	20.6545	20.3645	25.5171	27.8457	29.2427	30.9899	31.8193	32.7408	34.0494	34.3604	36.3377	33.6064	30.1896	31.1015	25.7571	28.8207	24.9988	27.3963	22.5195	25.6995	23.2997	25.3238	21.6901	23.3452	21.211	18.3077	15.1354	13.3445	14.6788	17.1249	15.7185	10.6618
94	34.5098	31.3611	30.6876	25.9796	25.5854	21.2675	20.2475	15.935	15.6529	14.0972	10.2387	8.19998	6.65147	11.284	13.1728	15.6424	12.4915	18.4243	17.7946	22.85	25.0377	26.3932	28.1171	28.9055	29.7261	31.0033	31.2264	33.2264	30.6536	27.2078	28.1282	22.7018	26.0365	22.1148	24.7069	19.7234	23.2242	20.9416	22.9747	19.906	21.058	19.0462	15.9573	13.2186	11.1686	12.6184	14.9214	13.5778	8.30604
95	32.357	29.0298	27.9491	23.3895	22.5689	18.3998	16.8412	12.7542	11.8451	10.4451	6.77114	6.71749	6.65384	9.20349	11.0472	13.0218	9.42395	15.3103	15.1136	19.8932	22.1693	23.806	25.7418	26.9393	27.7591	29.2108	29.5918	31.74	29.7781	26.2223	26.7193	20.9496	24.1248	19.7951	22.5532	17.2617	20.5742	18.6964	20.1639	16.5817	19.3552	17.9386	14.4549	12.8994	10.7107	12.4905	14.4649	13.0931	7.8787
96	27.1746	24.0003	22.9828	18.1919	17.8655	13.4624	12.8832	8.60207	9.52253	9.02258	5.98248	4.30612	7.32274	9.70847	9.78286	11.8585	6.89806	12.6778	11.0509	15.6029	17.4158	18.5913	20.2886	21.506	22.5417	24.1115	24.9946	27.1147	25.051	21.4748	21.5667	15.9191	18.5226	14.2984	17.1436	12.0411	16.3446	15.3969	16.8536	14.9013	16.4053	15.2664	10.6143	10.8835	7.21898	8.52093	9.31678	8.14964	4.14241
97	27.934	24.1823	22.8349	18.7384	17.2582	13.6816	11.5917	8.8112	7.26367	7.48907	6.92799	8.77228	9.72817	11.2242	11.4536	12.4588	7.93902	12.9562	12.8057	16.2585	18.0758	19.71	21.5448	23.3079	23.9039	25.4397	25.4721	28.0204	27.1874	23.6203	23.6874	17.589	20.6538	15.9636	19.4728	14.0012	17.7826	17.2891	17.2417	14.4353	18.7748	18.4805	14.4001	14.7127	11.1005	13.7508	14.4707	13.6725	9.35799
98	23.4984	20.029	18.7149	14.4913	13.5387	9.86783	8.88507	6.61478	7.32263	8.70492	8.93418	9.45165	12.0534	13.5086	13.1271	13.9217	7.94602	12.3261	11.1517	13.8881	14.9958	16.0218	17.4387	18.775	19.3647	20.9682	21.3115	23.8511	23.0654	19.4994	19.2616	13.1726	16.2218	11.7654	15.8942	10.6599	15.6635	15.9639	16.4422	15.2757	18.0803	18.2417	13.1721	15.2753	10.5931	12.2812	12.0973	11.0388	7.48617
99	22.2695	18.4105	16.8173	13.4277	11.4761	9.06597	7.07873	7.47635	6.97651	9.00552	10.2284	12.5946	14.363	15.2838	14.4732	14.6971	9.84787	12.4498	11.3346	13.5076	14.2092	15.3072	16.7794	18.555	18.9441	20.6183	20.266	23.3867	23.6213	20.4304	19.8039	13.8682	16.3854	12.044	16.2353	11.5274	15.9004	16.7136	16.0093	15.0777	19.4951	20.2777	15.7419	17.724	13.3793	15.9892	15.4151	14.9924	11.5541
100	18.9042	15.0729	14.223	10.491	9.824	7.22901	7.61331	6.61033	9.24072	11.4487	12.8496	13.3071	16.4716	18.0175	16.3433	16.5916	10.4838	13.5203	11.4048	13.1643	12.754	13.0526	14.0503	14.8117	15.0458	16.5825	16.5495	19.3822	19.1228	15.6726	15.2481	9.14995	12.5773	8.71331	13.374	9.33803	15.0486	16.1729	16.8463	17.398	19.2108	19.7599	14.3862	18.2296	12.7759	13.9918	12.3671	11.4719	8.76999
101	17.4965	13.4569	11.6453	9.85029	7.23582	7.80699	6.94994	9.19396	9.2392	12.0496	14.2562	17.4445	19.8438	20.1334	18.5071	17.8721	13.5468	13.779	11.5776	12.6494	11.3847	12.4192	13.5439	15.0891	15.2041	17.0538	16.3403	20.0469	21.3711	18.938	17.2266	12.3958	14.0145	10.9017	14.7829	11.2397	16.1953	17.931	16.3991	17.1781	21.7539	23.144	18.657	21.9366	17.2807	19.7415	18.0534	18.1607	15.4253
102	14.6089	10.2819	9.44485	7.74476	6.6445	7.22774	8.51143	9.52173	12.1597	15.0029	17.1097	18.6842	21.6616	22.8933	20.799	20.4169	14.6803	15.7834	12.6543	13.4735	11.1978	11.3279	11.8594	12.3413	11.9951	13.4678	12.7535	16.2194	17.0482	14.2364	13.393	8.16956	11.2099	8.94132	13.4514	10.5825	16.2804	18.3151	17.9283	19.9913	22.4663	23.6039	18.4075	22.8325	17.5668	18.7047	16.3347	15.8205	13.8151
103	13.3861	9.20484	7.6742	8.46347	4.65648	8.77647	7.44293	11.5525	12.2238	15.9709	19.3715	22.6569	25.7097	24.6261	22.6758	20.2305	16.9538	12.1435	12.1961	10.6392	10.2891	11.8459	11.8423	13.1031	12.8715	14.7905	13.6786	17.7164	19.7691	18.498	16.0491	13.1812	13.6679	12.6544	14.9785	13.595	15.6531	17.6471	14.4734	18.2565	21.6672	24.3293	21.0193	25.4684	21.994	24.5258	22.1632	22.8054	20.7391
104	12.0675	6.71477	7.68968	9.00594	8.8032	11.0248	12.3262	14.938	16.9947	20.0518	22.6215	25.3237	27.844	28.6912	26.5049	25.643	20.6013	18.4632	16.6885	16.3627	13.2783	13.2548	12.2005	12.5582	11.5366	12.8699	10.6603	14.7323	16.9634	15.7104	14.0492	11.7504	13.4579	13.0798	16.6231	15.0241	20.0776	22.5739	20.5026	24.0329	27.229	28.8364	24.2931	28.887	23.9858	25.4473	22.7424	22.6546	20.823
105	10.6555	8.7827	7.68307	9.57009	7.62912	11.3238	13.3227	16.589	18.7719	22.2889	25.6564	28.6726	31.6589	31.4146	28.9391	27.0978	23.2005	18.6229	17.3652	15.9537	12.7803	13.3949	11.6892	12.9814	12.9713	15.1306	14.0001	17.9331	20.1438	19.9182	17.1412	15.6359	15.355	15.3354	17.1017	16.6674	19.8818	22.4825	20.0732	24.6787	27.2775	29.5981	26.196	30.8789	26.8605	28.7237	25.8562	26.8238	25.4277
106	8.69851	7.27471	7.38188	9.55541	10.5063	13.6789	16.0267	19.3802	21.8324	25.2496	28.6347	31.6068	34.5976	34.3924	31.8544	30.0812	26.0324	21.9713	20.1761	18.7853	14.849	14.4031	11.4193	11.9383	11.4522	13.6292	12.3764	15.8246	18.1276	18.6603	16.131	16.0144	15.5097	16.6995	18.2586	19.0181	21.9678	25.0592	23.2753	27.8819	30.3293	32.4391	28.8153	33.5295	29.5754	31.2121	28.0589	28.9672	27.9248
107	5.326	3.99711	3.68832	6.39027	8.38942	11.8754	15.0457	18.4419	21.3462	24.8847	28.1999	30.598	33.7535	34.1579	31.1493	29.4623	24.8003	21.8996	18.9211	16.8883	12.8094	11.6759	8.17156	8.52327	7.60467	9.81111	9.33138	12.8253	14.7921	15.2498	12.2691	12.2563	11.9284	13.7506	15.2451	16.4494	19.7162	22.978	22.2741	26.7334	28.3951	30.3846	26.572	31.5678	27.7126	28.4578	25.0415	25.8644	25.3836
108	7.45557	5.24881	3.36831	5.51888	5.91232	8.968	11.6702	15.035	17.7744	21.2606	24.5894	27.3543	30.307	30.5239	27.7011	26.0647	21.5047	18.5699	15.8485	14.4152	10.444	10.0761	7.80845	8.89373	8.82248	10.9087	10.4639	14.0734	16.1789	16.0899	12.945	11.8389	11.3352	11.9642	13.9634	13.9567	17.6066	20.6812	19.413	23.991	25.8978	27.8994	24.0087	28.7989	24.7495	26.015	22.8661	23.7451	22.769
109	8.41794	4.36176	2.96342	3.52646	2.79996	5.35597	8.02459	11.3411	14.2488	17.7888	21.0924	23.6832	26.6519	27.0619	24.0163	22.4186	17.7426	15.4462	12.1964	11.0797	7.29651	7.17504	6.98582	7.21414	6.73704	8.73155	8.30102	12.2948	14.0913	12.6198	9.84199	7.70164	8.08985	8.5713	10.9127	10.1968	14.3027	17.1539	16.249	20.5232	22.2686	24.1829	20.2086	24.9913	20.9364	22.2721	19.2032	19.9372	19.1046
110	11.8208	8.55495	5.59671	5.72846	3.36967	5.21897	6.14685	9.29567	11.6124	15.0349	18.2845	21.1409	24.0787	24.2706	21.5874	19.8367	15.6198	12.056	10.2497	9.60975	7.31856	8.52709	9.2519	10.5153	10.6104	12.9175	12.6838	16.5215	18.2747	16.6641	13.9597	10.8162	10.9023	9.14983	11.8736	9.87029	13.8252	16.0112	13.7593	17.7436	20.6824	22.827	19.0385	23.5606	19.2504	21.2441	18.6347	19.609	17.9073
111	14.0989	10.9353	7.84842	5.98399	2.80784	3.54771	2.92997	5.45171	7.78551	11.2786	14.6534	17.4879	20.5359	20.5573	17.772	16.2264	11.9197	9.97388	7.17781	7.79941	6.81943	8.21025	9.30226	11.1314	11.8159	14.2983	14.5917	18.1981	19.4384	17.1725	14.6872	10.2035	10.5437	7.888	10.4393	7.25001	11.5462	13.4439	11.8563	14.7942	17.7059	19.5119	15.4028	19.8483	15.6973	18.137	15.8675	17.2497	15.3325
112	17.5358	14.3284	11.356	8.85936	5.69161	5.68804	3.58142	5.73515	6.2512	9.14595	12.1071	15.1812	18.0213	18.228	15.8477	14.7886	10.5224	9.9041	8.10224	9.18478	9.06216	10.5023	12.0219	14.1462	14.9479	17.2861	17.4028	20.962	21.9378	19.3507	17.326	12.1597	12.9849	9.30092	12.5025	8.89895	12.8588	14.4668	12.6817	13.9726	18.1284	19.5658	15.2597	18.9322	14.5843	17.5439	15.9263	16.8781	14.2542
113	15.9882	12.7194	10.8225	7.05627	6.10708	3.54303	2.84525	3.41644	2.9391	5.39412	8.30925	11.3259	14.2462	14.5057	11.9881	11.1049	6.8623	7.77059	7.02427	9.28112	9.0436	9.3641	10.538	12.1145	12.5166	14.4122	14.8497	17.9427	18.2113	15.2488	13.8487	8.07969	9.83848	5.6878	10.4224	6.37648	11.5903	12.3105	11.1898	10.8169	15.1929	16.3423	12.0478	15.1564	11.0541	14.2018	12.0082	12.5687	10.3845
114	23.0807	19.7521	17.3308	13.6785	11.3643	8.5416	5.55421	5.46447	3.1942	5.2765	6.72142	9.53417	11.902	12.5314	10.981	11.0892	6.56305	8.65926	9.22081	11.4694	12.7573	14.5392	16.5115	18.751	19.6951	21.741	22.0289	25.1589	25.2082	21.935	20.8779	15.0624	16.5981	11.8284	15.1899	10.2784	13.7398	14.2353	12.7159	10.9483	16.5348	17.0572	12.8926	14.5037	10.5604	14.0498	13.8014	14.2442	10.7654
115	24.5074	21.1299	19.3734	14.8548	13.5286	9.38858	7.62101	3.66886	3.03931	2.9539	3.01534	5.63669	7.9882	8.50006	7.30758	7.88114	3.72095	8.58933	7.66832	11.2051	13.1378	14.897	17.0604	19.2477	20.4701	22.4292	23.4669	26.0189	25.0415	21.4961	20.7087	14.9008	16.4828	11.5179	14.3523	8.85068	12.6056	12.4903	12.8636	9.79606	14.2576	14.1688	9.87708	10.7823	6.63037	9.83918	10.2863	10.7245	6.91103
116	28.8148	25.4649	23.5163	19.2611	17.5879	13.816	11.3439	7.99732	5.84315	5.20523	3.52945	5.68423	6.28284	6.97043	8.11919	9.29869	5.98357	10.8411	11.2707	15.1163	17.3982	19.4323	21.6626	23.8475	24.8988	26.6898	27.2638	29.8951	28.9803	25.3963	24.9719	18.9942	21.1127	16.1854	18.965	13.475	16.3535	15.2621	15.3038	11.9331	16.6128	16.0873	12.5967	11.5756	9.21412	12.4944	13.7622	13.7952	8.58794
117	31.1768	27.8232	26.1022	21.5873	20.1975	16.1114	13.9253	9.86442	8.21294	6.25158	2.69245	3.47332	2.65006	4.45089	6.38927	8.6385	5.87991	11.4844	12.0035	16.6327	19.2219	21.3132	23.6578	25.8435	27.0187	28.7951	29.6741	32.0447	30.5941	26.9982	26.7238	20.8829	22.9217	18.0405	20.2801	14.9065	17.3377	15.3381	16.265	12.4178	16.1903	14.6565	11.8935	9.33288	8.16335	11.1425	13.2281	12.7643	6.99295
118	34.0983	30.789	29.2571	24.6537	23.4896	19.3034	17.3385	13.1269	11.6771	9.30532	5.32807	5.50482	3.42374	5.79971	8.35561	10.8199	8.68147	14.3706	14.8515	19.7879	22.4253	24.4229	26.6876	28.6494	29.7253	31.3966	32.214	34.4129	32.5851	29.0009	29.0567	23.2869	25.598	20.9352	23.0957	17.8348	20.2357	17.7556	19.1963	14.984	18.2068	16.5243	13.7597	11.1608	9.79474	12.6583	14.8074	14.3656	8.34892
119	37.3905	34.1052	32.7104	28.0126	26.9914	22.7112	20.8579	16.4914	15.1435	12.3315	8.35832	6.9394	3.05601	7.33126	9.65684	12.6296	11.5859	17.0857	17.6618	22.8324	25.5939	27.5985	29.8869	31.7397	32.878	34.5005	35.2948	37.4329	35.2026	31.7043	31.943	26.3176	28.5731	24.1125	25.9752	20.8943	22.9737	19.967	21.8614	17.4176	20.0004	17.8059	15.5642	12.1131	11.2047	13.1626	15.9852	15.7379	9.967
120	32.1994	29.2227	28.3007	23.4294	23.1256	18.6173	17.6183	12.9494	12.8886	10.8641	7.10863	4.24132	2.93477	8.3291	9.51126	12.0235	8.77759	14.5842	14.0425	19.326	21.7827	23.2606	25.1658	26.4184	27.6008	29.118	30.0083	32.0255	29.3985	25.9046	26.2576	20.9223	23.2058	19.2625	21.2918	16.4764	19.3704	16.9826	19.0009	16.2191	17.1822	15.11	12.0944	9.07474	7.52463	9.11352	11.3502	10.1769	4.66161
121	38.8606	36.1383	35.1582	30.2954	29.9751	25.3906	24.2353	19.4845	19.1845	16.2498	12.4614	8.25555	5.16521	11.0847	10.9458	15.0542	14.3736	19.047	18.9117	24.4385	27.2438	29.0061	31.2872	32.9685	34.4627	35.9219	36.8241	38.7283	35.5802	32.2187	32.7967	27.7979	29.392	25.7855	26.3945	22.2805	23.2954	19.9356	22.588	19.3232	19.0474	16.1204	13.4896	9.19925	9.35339	10.6097	13.9909	15.0145	10.3014
122	39.7625	37.2118	36.2248	31.431	31.1553	26.6338	25.4576	20.9006	20.7336	17.4896	14.0437	9.46514	5.83758	11.7245	10.7336	15.2923	15.5493	19.5721	19.4633	24.8889	27.7742	29.5804	31.9772	33.8757	35.6444	37.3036	38.9922	40.8027	37.3915	34.1551	33.8342	29.6894	30.1512	26.6068	26.6809	23.0716	23.1972	19.6088	22.4497	18.6342	18.291	15.1164	12.4162	8.32502	9.61864	10.4338	13.8877	15.3608	11.9287
123	39.377	37.1277	36.4162	31.589	31.7136	27.0701	26.3568	21.6625	22.1982	19.1681	15.8441	10.783	8.07154	13.982	12.8151	17.2487	16.9501	21.2853	20.6841	26.1518	28.7639	30.227	32.3075	33.5151	35.1315	36.5588	37.9298	39.6067	35.7568	32.6445	32.8289	28.9128	29.9183	26.6351	27.2634	23.6498	24.6061	21.5001	24.3239	20.7282	20.3762	17.2642	14.4093	10.3739	10.7519	10.9962	14.2358	14.6769	11.837
124	35.52	32.9809	32.2604	27.3937	27.4842	22.8482	22.2922	17.5178	18.2485	15.9018	12.4681	7.72246	6.7042	12.431	12.0343	15.6235	13.2452	18.2448	17.262	22.7332	25.1705	26.5265	28.4788	29.6432	31.1079	32.5804	33.7854	35.6027	32.2057	28.9117	29.3313	24.6645	26.1549	22.8652	23.851	19.8099	21.7339	18.9213	21.6858	18.8885	17.8602	15.0878	11.9106	8.21577	8.0142	7.99578	11.1618	11.5249	7.47449
125	33.5928	31.5308	31.0287	26.3197	26.8489	22.3454	22.2869	17.7487	19.2861	17.2929	14.5271	8.99126	9.70014	15.1439	13.8625	16.6356	14.1188	18.1369	16.3326	21.5819	23.7863	24.8245	26.6682	27.7592	29.5312	31.0056	32.746	34.2946	30.3389	27.2988	26.8542	23.7149	24.088	20.7026	21.5269	18.574	19.7756	17.4335	20.3367	18.164	16.5662	13.9653	10.8357	8.14465	6.97764	5.13469	8.46792	8.72659	7.89749
126	31.1188	28.6369	27.9761	23.1339	23.4471	18.8093	18.2239	13.4826	14.1689	11.8038	8.73558	3.6634	5.94621	9.689	9.34037	11.8414	8.98038	13.9113	12.8854	18.1735	20.6585	22.0779	24.1131	25.235	26.765	28.2796	29.6932	31.5016	28.1725	24.8642	25.0616	20.4868	21.7165	18.5498	18.9989	15.6412	16.4216	13.8244	16.6345	14.3945	12.9525	10.433	7.36707	4.68591	3.22898	2.63447	6.00543	7.11192	3.83682
127	34.0808	31.6925	30.7499	25.9731	25.3618	20.8986	19.4238	14.9252	14.8097	11.8838	8.9489	3.42284	3.49005	8.13576	6.56709	10.1754	9.39629	13.571	13.6158	19.0838	22.0676	24.0981	26.5142	28.2043	30.0264	31.6722	33.5016	35.2795	31.8184	28.6245	28.0186	24.2554	24.4632	20.9248	21.2584	17.5226	17.8226	14.2719	16.92	13.7099	13.29	10.3748	7.70055	3.43653	4.29984	4.88124	8.22609	9.55295	7.21329
128	34.4438	32.5331	31.8276	27.1793	27.3772	23.0327	22.5968	18.3162	19.5827	17.4141	15.0534	9.16906	10.864	15.2228	12.7591	15.4791	14.174	17.4693	16.0961	21.2946	23.7546	25.0794	27.2152	28.7209	30.756	32.3069	34.3879	35.9725	31.994	29.1241	27.2472	25.3322	24.9251	21.2418	21.7068	18.5177	19.1014	16.3485	19.3037	16.4396	15.0075	12.1793	8.96376	6.33043	6.16944	5.70467	8.33113	9.02024	9.58098
129	32.0447	30.5516	30.1286	25.702	26.3237	22.2603	22.4539	18.3439	20.3365	18.5991	16.6271	10.9406	13.4087	17.368	14.7895	16.603	15.1444	17.9427	15.3169	20.5095	22.5426	23.2924	25.2754	26.5037	28.5791	29.9803	32.1494	33.3576	29.116	26.6227	24.1295	22.9556	22.7774	19.1047	19.5811	16.6184	17.698	15.4367	18.6397	16.4401	14.2498	11.187	9.03823	7.84034	6.53164	5.11958	6.5644	6.48458	9.52884
130	31.916	30.6448	30.667	26.2869	27.5299	23.3867	23.899	19.5488	22.1325	20.6795	18.661	13.035	15.3592	19.6103	17.3695	19.0822	17.1993	20.0456	17.0984	22.4027	24.2508	24.294	26.1154	26.4031	28.2374	29.3826	31.2121	31.9971	27.7154	25.1877	23.667	22.4477	22.8667	19.6757	20.7762	18.5707	20.0295	17.997	21.1664	19.293	17.1543	14.5111	11.7752	10.5288	8.68069	5.93045	8.32076	6.87854	9.92192
131	27.7717	26.2382	26.295	21.8074	23.2772	19.0498	20.0387	15.3807	18.2355	17.2116	14.9409	10.1117	13.2933	17.0505	15.976	17.3492	13.7044	17.6139	14.6647	19.7165	20.9478	20.4437	22.0804	22.1056	23.7791	25.0034	26.7102	27.8962	23.8122	20.9579	20.384	18.2117	18.6597	15.7519	17.2115	15.5298	17.7955	16.7573	19.7695	18.9584	16.7093	14.7451	11.0582	10.527	7.59943	3.81636	6.83518	3.52739	5.4321
132	25.7669	25.0562	25.5723	21.1444	23.6773	20.1697	22.1021	17.447	22.3167	21.9628	20.3024	15.5649	18.8582	22.4941	20.702	21.3622	18.1575	20.5653	16.0743	20.24	20.9688	19.4169	20.8565	20.5428	22.3923	23.4213	25.457	26.0531	21.5898	19.4801	17.1084	16.4425	17.0055	14.6129	15.7724	15.8806	18.1236	18.3014	21.3713	21.4828	18.8447	16.9468	13.7105	14.3022	11.0557	6.36639	8.88087	3.41835	8.91657
133	24.9817	24.1763	24.7253	19.9687	22.7142	18.8416	20.8947	15.9986	20.9664	21.1968	19.6037	15.2302	19.3256	22.5741	20.9933	21.9316	17.3565	20.4768	16.0528	20.3841	20.9423	19.2962	20.5876	19.8381	21.3089	22.1717	23.5885	24.1265	19.6544	17.4908	16.4062	15.4462	16.4718	14.4155	16.1643	15.858	18.5278	18.8501	21.8023	22.2712	19.5129	17.9542	14.072	15.7782	12.2667	7.45089	8.85373	4.00267	7.87793
134	22.2925	20.8645	21.3207	16.4881	19.1613	15.3525	17.6716	12.7904	18.0619	18.7693	18.0323	14.4198	19.3084	21.8328	19.8186	20.4811	15.0874	18.2726	14.0089	17.9998	18.1791	16.6139	17.7439	16.7577	18.0639	19.0727	20.3636	21.18	16.882	14.3681	14.779	12.2517	13.6784	11.9157	14.0791	12.9504	16.6901	17.4039	20.1336	21.5309	19.1134	18.201	12.9304	16.298	12.1352	8.47362	7.56796	4.47579	6.63598
135	23.4141	22.3463	23.3057	18.2596	21.7803	18.4169	20.8911	16.3869	21.5415	22.1815	21.0064	17.1923	21.5839	24.5577	23.1404	24.1411	18.718	22.4221	18.2389	22.2095	21.8498	20.0061	20.5632	18.4526	19.0719	18.8754	19.2014	20.4064	16.3688	13.6469	15.0598	13.0256	15.9645	15.615	17.8131	17.0472	20.9161	21.6242	24.3431	25.5828	23.0633	21.8941	16.8263	19.3141	15.4646	11.4278	11.5884	8.01941	10.0262
136	22.9115	22.1685	23.6158	18.5724	22.8031	19.8674	22.6159	18.3563	23.5435	24.3553	23.2164	20.0201	23.9521	27.0705	25.9364	26.8697	21.0991	24.7245	20.6309	23.9419	23.1581	20.979	21.176	18.4723	18.7789	17.5734	17.4426	18.0753	14.1736	12.1455	13.9769	13.2259	16.1747	16.7625	18.9854	18.8336	22.9476	24.071	26.8122	28.3248	26.0356	25.0927	19.799	22.7094	18.5796	14.9882	14.4659	11.1271	13.0809
137	22.184	19.7348	21.8144	16.9158	20.3941	17.5953	19.963	16.3246	20.9651	21.766	20.7035	18.0042	21.9483	24.7933	23.9321	25.0663	18.915	23.3839	19.9959	22.8344	21.8389	20.228	20.3433	17.6724	17.5894	16.5139	15.6242	16.8427	13.7023	11.399	13.6367	11.1731	15.7198	15.8458	18.593	17.5863	22.6614	23.8354	26.0948	26.9446	25.793	24.9749	19.3354	22.1781	17.4304	15.5932	14.4181	10.8369	11.3159
138	24.3618	21.3468	24.6329	19.9244	23.6981	21.1292	23.4367	19.9652	24.3419	25.3798	24.5077	22.1616	25.8324	28.6906	27.9929	29.0949	22.8199	27.1471	23.8693	26.5056	25.3972	23.6567	23.5697	20.4995	20.0254	18.1027	16.7518	17.687	15.0689	13.3057	15.5258	14.1887	18.6705	19.3263	22.1026	21.2918	26.3584	27.666	29.9354	30.8721	29.9733	29.2873	23.5858	26.59	21.7296	19.9719	18.6434	15.173	15.5405
139	21.6553	16.8893	20.0226	16.2751	18.6836	16.8067	18.4621	16.5601	19.2223	20.6804	20.5699	20.0036	23.1982	25.1601	24.6856	25.6202	19.3158	23.6827	21.4694	23.1704	21.6805	20.759	20.5448	18.0306	17.1719	16.2779	14.9609	17.0615	15.7498	12.8732	14.5983	11.0552	16.9253	16.2915	20.1622	18.5284	24.1438	25.6571	27.2481	27.1857	28.4055	28.2441	22.4824	25.8899	20.2756	20.2673	18.6769	16.0088	14.4949
140	26.1679	21.3899	25.2874	21.3844	24.0076	22.0987	23.4095	21.3807	23.9214	25.2533	24.7242	23.7839	26.7538	29.0013	29.0444	30.2211	23.9647	28.6105	26.0625	28.2955	27.0047	25.8997	25.5723	22.735	21.8042	20.039	18.1793	20.1542	18.4438	16.1432	18.1492	15.9418	21.4552	21.3935	24.9664	23.3678	28.942	30.2408	31.9709	31.9237	32.6673	32.2188	26.4332	29.4018	24.154	23.5289	22.1502	18.9118	18.074
141	21.7216	16.3436	20.7495	17.6873	20.4293	19.2199	20.5698	19.4448	21.9846	23.709	24.0459	23.9265	26.9126	28.6989	28.2002	28.9505	22.7454	26.6187	24.3911	25.804	23.9249	22.8604	22.0621	19.3374	17.8977	16.0886	13.9255	16.0616	15.663	13.517	15.1005	13.0685	18.7004	18.9749	22.8144	21.5169	27.2681	28.8296	29.8949	30.1607	31.8225	31.8967	26.1482	29.8525	24.1317	24.2603	22.5176	19.9927	18.4726
142	27.1237	21.3691	25.8118	23.107	24.9121	23.8482	24.5978	23.9213	25.3001	26.8934	26.9457	27.2966	29.1004	31.1666	31.4284	32.4157	26.4849	30.6015	28.7641	30.374	28.7186	27.9917	27.5185	24.9774	23.526	21.673	19.2396	21.3432	21.138	19.105	20.7934	18.5574	24.3423	23.9269	28.0313	26.1682	31.9061	33.35	34.2057	33.596	36.1006	36.0199	30.2998	33.5139	27.9966	28.0857	26.6457	23.8575	22.3199
143	28.161	21.8694	26.6643	24.665	25.9444	25.3606	25.9872	25.8127	26.9469	28.6577	28.9782	29.5653	31.8233	33.2634	33.4411	34.2885	28.5005	32.3181	30.3265	31.8492	30.0946	29.5515	29.0742	26.7399	25.0497	23.2403	20.4774	22.4085	22.9784	21.0855	22.8789	20.6731	26.412	25.8241	30.0915	28.0038	33.8503	35.3414	35.7536	35.2662	38.214	38.308	32.6784	35.7307	30.3963	30.7964	29.347	26.7809	24.9851
144	30.0353	23.7343	27.9067	26.2467	26.7035	25.628	25.1217	25.2088	24.583	25.9324	25.8744	27.4119	28.4998	29.5529	30.5095	31.3254	26.4923	30.6092	29.5592	31.5245	30.7506	30.6458	30.62	28.6551	27.1025	25.8059	23.0126	25.2703	26.012	23.9175	25.508	22.5403	28.394	26.9805	31.4794	28.3912	33.9484	34.7	34.3804	32.6254	37.0243	37.0873	31.9677	33.5546	29.2347	30.4415	29.756	27.5648	24.8877
145	28.8925	22.4165	26.8795	25.9206	26.2607	26.2396	26.5106	26.9415	27.664	29.3331	29.7595	31.1172	32.6495	33.7832	34.2735	34.9522	29.7442	33.1725	31.0973	32.5533	30.7017	30.4726	30.1564	28.3546	26.4854	25.1214	22.0105	24.4285	25.8835	23.89	25.5158	22.9188	28.4626	27.3306	31.8025	29.2724	35.1536	36.6612	36.3992	35.8743	39.6886	40.098	34.7135	37.17	32.4031	33.3896	32.019	29.9206	27.6513
146	26.4648	19.9334	24.4288	23.9456	24.2558	24.8474	25.1748	26.0169	27.0347	29.1252	30.3563	32.0577	33.9225	34.93	34.6423	34.9304	29.6487	32.0528	29.8265	31.0518	28.8643	28.6677	28.0614	26.4686	24.523	23.2998	20.0275	22.6411	24.6737	22.7842	24.3141	21.8632	26.9383	26.0506	30.4429	28.057	33.9003	35.6249	35.0429	35.1484	39.0186	39.7043	34.4151	37.5956	32.5944	33.6667	31.912	30.1667	27.9795
147	25.712	19.2813	22.7066	22.0072	21.4565	21.6171	21.4798	22.3532	22.8149	24.8297	26.0118	28.0208	29.6449	30.5669	30.3419	30.6054	25.5548	28.1179	26.1895	27.6448	25.9756	26.0683	26.1796	24.9876	23.5382	22.945	20.054	22.8911	24.602	22.4378	23.6322	19.8955	24.8606	23.2282	27.84	24.8307	30.625	32.0462	31.3407	30.9143	35.1816	35.8392	30.6992	33.4921	28.721	30.1019	28.5867	27.0199	24.5171
148	26.6382	20.2953	24.1221	22.7663	22.7186	22.1949	21.934	22.1555	22.1389	23.7755	24.2637	25.7685	27.275	28.3797	28.7394	29.3949	24.2358	27.9385	26.4519	28.251	27.0687	26.9863	27.0759	25.3776	23.8601	22.9386	20.169	22.7028	23.76	21.5727	22.9585	19.5094	25.1021	23.5703	28.1344	25.0805	30.8404	31.8139	31.5721	30.3475	34.4523	34.7168	29.4926	31.7121	27.0681	28.2684	27.2081	25.2187	22.6184
149	22.2427	16.0386	20.6072	18.8515	20.3154	19.9004	20.1928	19.9606	20.7818	22.4647	22.8805	23.7769	25.8854	27.2819	27.2918	28.0994	22.3585	26.2275	24.4977	26.2138	24.4794	23.8501	23.2228	21.0637	19.3156	17.9522	15.1834	17.5397	18.526	16.4045	17.9357	15.4323	21.0014	20.5202	24.7522	22.5901	28.3961	29.6163	29.8713	29.0961	32.291	32.4719	27.017	29.7816	24.6957	25.5476	24.2671	22.0932	19.7796
150	26.8843	20.9043	24.5384	21.9206	22.8836	21.266	21.8895	20.903	22.1379	23.572	23.2186	23.558	25.3005	27.1332	27.8379	28.9439	22.9472	27.3907	25.8175	27.606	26.4757	26.0604	26.2027	24.176	23.0763	21.905	19.8953	21.9839	21.6153	19.2097	20.8142	17.3709	23.3981	21.7776	26.1318	23.4785	29.2598	30.3921	31.2372	30.3527	32.8143	32.6908	27.0987	29.8339	24.5832	24.9945	23.8629	21.2171	19.2237
151	26.1026	20.7635	23.8982	20.7022	21.9431	19.9813	20.8154	19.2667	20.4022	21.5062	20.678	20.4585	22.6315	24.7627	25.1941	26.5652	20.547	25.5406	23.7798	26.2259	25.2449	24.7355	24.8813	22.8283	21.9181	21.1037	19.4781	21.5735	20.7462	18.0142	19.6918	15.8302	21.8364	20.2373	24.4622	21.838	27.62	28.5122	29.5837	28.3631	30.4608	30.0617	24.5222	26.8908	21.7462	22.0206	21.2634	18.4114	16.3839
152	27.2466	22.2344	25.2069	21.613	23.1272	20.797	21.729	19.6176	21.5916	22.6517	21.5155	20.4646	22.9344	25.5136	25.8986	27.3506	21.1543	26.3156	23.9923	26.7232	26.1044	25.5153	25.665	23.3199	22.6808	21.5016	20.0134	22.1451	20.0425	17.4066	19.4176	16.2637	21.8651	20.7096	24.4599	21.9085	27.5589	28.4265	29.9297	29.4064	30.3146	29.6787	24.0301	26.3984	21.3664	20.9513	20.1046	16.8161	15.5311
153	23.7033	19.6778	21.4109	17.0895	18.6344	15.4233	16.7714	13.6112	16.7686	17.7758	17.0429	15.4923	19.1529	21.4866	20.8443	21.9662	15.6234	20.5126	17.8986	20.6963	20.6377	19.991	20.3294	18.8414	18.8391	18.8687	18.2865	20.2687	18.1234	14.8662	16.6481	11.7506	17.1207	14.9286	18.5606	15.7514	21.3275	22.1715	23.824	23.9577	24.2041	23.6934	17.9418	20.7824	15.5958	14.9247	13.8646	10.5788	9.53056
154	27.2125	24.5038	26.3207	21.4726	24.0465	20.7007	22.3436	18.5201	21.6028	22.0366	20.1428	17.4737	20.3052	23.7398	23.7418	25.3667	19.4043	24.7302	21.8956	25.3684	25.3433	24.1767	24.6533	22.4552	22.5446	21.9316	21.3452	23.0287	19.7574	16.9563	18.9448	15.8114	20.392	19.5048	22.2847	20.1884	25.2841	25.8514	27.8217	27.8767	27.1381	26.0053	20.5844	22.2748	17.9509	16.3693	16.1842	12.4397	12.0987
155	21.3084	19.6886	20.2272	15.2796	18.096	14.5005	16.7449	12.1043	16.7508	17.2622	16.259	13.0801	17.7454	20.2899	18.8314	19.8025	13.9346	18.1737	14.561	18.3605	18.0578	16.5646	17.3849	15.8972	16.7918	17.6065	18.4095	19.8819	16.1087	12.9105	13.8314	10.3744	13.2731	12.2429	14.3526	13.0298	17.5433	18.3778	20.6607	21.5901	19.9858	19.0998	13.5063	16.5444	11.7907	10.0159	8.58839	4.95992	5.91834
156	26.6491	25.3036	25.9006	20.9516	23.5672	19.6755	21.5843	16.8009	21.1058	21.2399	19.1745	15.1811	18.7411	22.2779	21.576	23.0571	17.7429	22.2199	18.3725	22.6616	23.1686	21.7675	22.7742	21.3485	22.2759	22.621	23.1279	24.3845	20.3278	17.5243	18.7064	16.0064	18.5308	17.1579	19.3114	17.5951	21.6205	21.8556	24.3762	25.1331	22.8509	21.4571	16.4396	17.839	14.248	10.6237	11.5407	7.88487	9.28077
157	25.7247	23.8087	23.8153	19.1966	20.5775	16.2766	17.4839	12.6614	16.1372	15.9748	14.0715	10.0584	14.14	17.3752	16.2309	17.5851	12.3773	16.9954	13.6576	18.256	19.3011	18.8768	20.2071	19.9959	21.3401	22.5398	23.7797	25.3683	21.5449	18.3828	18.9637	15.0597	16.7781	14.3798	16.1721	13.5456	17.3491	16.9508	19.4971	19.9067	17.8505	16.4779	11.3887	13.0554	8.91798	6.36475	6.74261	3.22935	3.98132
158	28.9441	27.8876	28.4705	23.6222	26.2231	22.1964	23.9837	19.0459	23.3295	22.9895	20.9421	16.198	19.1588	23.1812	21.9448	22.9821	19.2253	22.742	18.667	23.6456	24.6004	23.4156	24.6588	23.6261	24.9019	25.4804	26.3447	27.2608	22.967	20.4387	20.8924	19.2017	20.4493	18.5833	20.3046	19.3054	21.7417	21.0169	24.0416	23.7133	21.2212	19.282	15.6753	15.8551	12.7748	8.10277	10.9921	7.13874	9.86488
159	31.8063	30.8023	31.2825	26.5498	28.2539	23.8577	24.7815	20.0399	22.9788	21.8141	19.2323	14.361	16.0677	20.7637	19.7594	21.7353	18.3933	22.3338	19.2924	24.4686	25.9765	25.7168	27.1603	26.4625	27.9171	28.6801	29.6875	30.4911	26.1358	23.7104	23.5175	22.1464	23.1357	20.8827	22.4907	20.4653	22.8759	21.2829	24.2739	23.1055	21.0336	18.7378	15.585	13.8998	11.6482	7.89283	11.332	8.69868	10.0881
160	31.798	31.0896	31.0972	27.05	28.2036	24.546	25.3918	21.1477	24.6537	23.5956	22.1603	16.8442	19.763	23.4648	20.4234	21.5146	19.8513	21.501	18.0149	22.9559	24.4484	24.0891	26.0531	26.6518	28.7415	29.9036	32.123	32.7593	27.892	26.0543	22.9397	22.8619	23.0323	19.712	20.1931	18.393	19.9296	18.5963	21.8587	20.4276	17.8541	14.863	13.4131	13.6034	11.4267	8.44261	9.48017	7.16551	12.5235
161	35.8908	35.0865	35.509	30.9596	32.9829	28.9347	30.1098	25.3939	28.7838	27.4345	24.7497	19.5598	20.4675	25.7156	24.3999	26.654	24.0427	27.3375	23.7549	28.9508	30.2328	29.3561	30.9624	30.6334	32.3118	33.2144	34.485	35.0589	30.623	28.4149	27.063	26.3952	27.1537	24.5821	25.7907	24.6226	26.5164	25.1588	28.3602	26.9076	24.5911	21.8799	19.4482	18.0925	16.1748	12.4177	15.1912	12.1864	15.5988
162	35.1225	34.484	35.2829	30.399	33.2858	29.27	30.8794	25.9815	29.697	28.8657	26.2814	21.3827	22.7999	27.7769	26.4046	28.3646	25.3624	28.825	25.0838	30.1972	31.2434	30.0481	31.3305	30.0981	31.3098	31.3442	31.9698	32.4857	28.1655	26.1178	26.4696	25.5709	26.9213	25.1959	26.6111	25.9115	27.9798	26.8795	30.0336	28.9144	26.5553	24.1024	21.5295	20.06	17.9107	13.8352	16.84	13.4594	16.3887
163	33.5154	32.5486	33.1492	28.2929	30.7707	26.6389	28.1583	23.2546	26.845	26.1432	23.5294	18.8376	20.41	25.3403	24.7393	26.5569	22.6321	26.7472	23.178	28.1513	29.1921	28.0113	29.3078	28.2709	29.5096	29.8492	30.522	31.3528	27.0281	24.6782	25.2563	23.7668	25.0896	23.1698	25.0251	23.6621	26.5322	25.5902	28.5637	27.8973	25.6424	23.5087	19.9806	19.0068	16.5282	12.3034	15.4889	11.9364	13.7564
164	31.5775	30.8098	31.7004	26.7181	29.5454	25.4516	26.5995	21.8175	24.5426	23.6868	20.7282	16.2471	17.3518	22.3711	22.3233	24.6285	20.4558	25.094	22.261	27.1829	28.4815	27.3137	28.3374	26.6312	27.5165	27.1924	27.4724	28.1694	24.0281	21.8462	23.01	21.755	23.7497	22.5519	24.7042	22.7384	26.1269	24.7976	27.5929	26.7642	24.8382	22.6851	18.9194	17.4652	15.3056	11.714	14.8273	11.6217	11.8551
165	30.8113	29.103	29.2208	24.4273	25.072	20.5272	20.8416	16.2468	17.4634	15.8851	12.4529	8.33827	9.39354	13.8899	14.5197	16.9235	13.132	18.5032	16.6238	21.7089	23.5404	24.28	25.6944	25.3107	26.3231	26.9711	27.4089	28.8513	24.9081	21.983	23.1604	19.7415	22.423	20.0056	21.512	17.8032	21.0205	19.3157	21.8131	20.7402	19.3256	17.2984	13.3647	11.5171	9.23433	7.53961	10.405	8.31042	5.48998
166	32.0129	29.8594	30.0302	25.3483	26.423	22.2185	22.8917	18.6894	20.2259	19.5794	16.3093	12.7999	14.1507	18.522	19.3727	21.6182	16.8611	22.3269	20.2551	24.9757	26.2711	26.2683	27.282	26.5522	27.311	27.8739	27.9686	29.6257	25.8685	22.897	24.3033	20.3474	23.8479	21.5549	23.9551	20.4426	24.8752	23.5927	25.8642	24.9634	23.9546	22.1443	17.7359	16.7314	13.9611	11.7899	14.1046	11.1156	8.60868
167	26.2039	23.9035	23.885	19.2671	20.3257	16.2416	17.1505	13.0694	15.6352	15.8688	13.982	11.4108	13.7645	17.5419	17.5223	19.0979	13.1614	18.5153	15.7615	19.7269	20.6324	20.4499	21.3143	20.6932	21.4425	22.4431	22.7573	24.5336	21.331	17.982	19.1568	14.4072	18.0478	15.5462	18.329	14.8897	19.8152	19.6776	21.6755	21.6132	20.8722	19.764	14.345	15.9653	11.6531	10.408	10.3759	6.8927	5.86666
168	30.2091	26.3456	27.4246	23.2734	23.6812	19.967	20.0582	16.8839	17.6521	17.751	15.3042	13.8303	15.3579	18.603	19.5696	21.5813	15.9997	21.806	20.0035	23.9931	25.0806	25.3192	26.0659	25.1499	25.3175	25.6388	25.1259	27.1231	24.5852	21.3668	23.0803	18.1506	23.1029	20.2483	23.8467	19.6742	24.9896	24.4096	25.9367	24.2839	25.4596	24.3287	19.2935	19.7081	15.8784	15.4085	16.0327	12.6832	9.96449
169	26.2577	22.0223	23.1004	19.2026	19.5887	16.31	16.7168	14.2051	15.5726	16.388	15.0623	13.518	16.4292	19.0813	19.1399	20.7069	14.6317	20.1788	17.8991	21.3088	21.8539	21.6598	22.3171	21.5042	21.5045	22.1069	21.5521	23.5589	21.7713	18.4105	19.865	14.4347	19.6591	16.6869	20.563	16.8152	22.2921	22.4123	23.9014	23.0835	23.8315	23.0257	17.5548	19.5284	14.6005	14.4524	14.1724	11.1123	9.14384
170	28.1721	23.2058	24.6317	21.1869	20.9731	18.1422	17.8282	16.0792	16.1918	17.046	16.0285	16.3378	18.1179	20.0091	20.6723	22.0446	16.4586	21.6783	20.3497	23.2421	23.7799	23.8983	24.6768	24.121	23.8025	24.1148	23.0633	25.1357	24.0774	20.8889	22.4742	17.0941	22.4066	19.2311	23.6145	19.3928	24.9845	25.2088	25.8715	23.9939	26.8808	26.4766	21.2528	22.8268	18.1589	18.5767	18.4581	15.6566	13.1472
171	24.7213	19.8099	21.6296	18.3274	18.6441	16.1115	16.5911	14.9752	16.3577	17.6521	17.359	17.3235	20.0421	21.8495	21.6971	22.7841	16.6617	21.3502	19.6133	21.9264	21.6135	21.3899	21.8853	20.7597	20.3281	20.6329	19.647	21.7134	20.7481	17.5273	19.0394	13.6847	19.3235	16.7236	21.0862	17.6839	23.4799	24.3188	25.3468	24.3932	26.4771	26.286	20.7221	23.4925	18.1742	18.7142	17.7078	15.2713	12.9508
172	25.0147	19.3577	21.121	18.8469	18.0718	16.6766	16.1839	16.2634	16.2232	17.9233	18.4826	19.5191	21.3868	22.7665	23.0007	23.6107	18.3122	21.9581	20.5989	22.5321	21.8964	22.1831	22.85	22.4135	21.6346	22.2004	20.2152	22.843	23.2482	20.525	21.5673	16.1945	21.219	18.4241	23.1895	19.4453	24.989	25.8562	25.6528	24.4915	28.4642	28.724	23.4404	25.6	20.8378	21.957	21.125	19.0789	16.3465
173	21.5962	15.886	18.6122	16.5529	16.6592	15.6668	16.2533	16.118	17.7074	19.6727	20.6617	21.553	23.8897	25.1322	24.8069	25.2643	19.4294	22.7238	20.5483	22.0908	20.6183	20.4042	20.6512	19.0754	17.9401	17.6549	15.675	18.0844	18.3036	15.7401	16.9267	12.6277	18.4586	16.6729	21.2719	18.4532	24.316	25.7521	25.9873	25.9988	28.8194	29.2343	23.7639	27.1817	21.8634	22.6481	20.9868	18.927	16.8403
174	22.9996	16.9123	19.052	18.2552	17.0418	17.2831	16.795	18.0053	18.2932	20.2715	21.4437	23.4668	25.1421	26.0964	25.7485	26.0544	20.9363	23.3745	21.5629	23.0044	21.539	21.9243	22.4036	21.9282	20.844	21.1839	18.5146	21.7815	23.3213	20.9893	21.5636	16.9468	21.4826	19.3554	24.0204	20.6038	26.2048	27.5842	26.5825	26.355	30.6792	31.2793	26.1885	28.871	24.1306	25.6757	24.2922	22.8826	20.1916
175	19.7839	13.3071	17.5031	16.7739	17.4309	17.9392	18.8574	19.3827	20.6709	22.8112	24.1499	26.0949	28.1952	29.0306	28.5054	28.6045	23.4888	25.6972	23.2864	24.3769	21.9639	21.5865	20.93	19.3623	17.6492	16.8385	13.881	16.765	18.6397	16.489	17.6945	14.5498	19.6626	18.8099	23.1496	21.0275	26.8963	28.7944	28.6513	28.6733	32.4492	33.1848	27.7862	31.4565	26.1959	27.16	25.0818	23.5345	21.5278
176	20.8335	15.1745	16.1068	16.0883	14.0809	15.4234	14.5914	16.811	16.524	19.4467	21.5737	24.6458	26.8345	27.2515	25.8708	25.2432	21.0761	20.921	19.2801	20.1442	18.6658	19.4099	20.0267	20.2934	19.5868	20.5236	17.8691	21.685	23.8737	21.916	21.1498	17.321	20.1022	17.9959	22.2323	18.9092	23.9554	25.6356	23.8478	24.4562	29.2913	30.6374	26.224	29.3808	24.8422	27.191	25.3577	25.1121	22.4992
177	23.4447	17.2856	20.677	21.1941	20.4919	22.0597	21.9366	23.7023	24.1184	26.757	28.5193	31.3488	33.1701	33.7933	32.8899	32.5842	28.0319	28.6024	26.6212	27.5592	25.2499	25.4573	24.9209	24.2494	22.43	21.917	18.478	21.3571	23.8726	22.8068	23.8636	21.1768	24.9385	23.8872	28.1623	25.5234	31.0408	32.8651	31.4005	32.0648	36.5869	37.7587	32.9527	36.2544	31.4723	33.2319	31.2784	30.3567	27.981
178	23.0269	16.5865	21.3626	21.513	22.1795	23.6337	24.0994	25.5256	26.4102	28.8162	30.3882	32.9463	34.6903	35.4669	34.7474	34.6608	29.7796	30.9193	28.7801	29.6567	26.8769	26.574	25.3553	23.897	21.5353	20.5794	17.1355	19.8535	22.2315	21.0024	22.4282	20.6404	24.9932	24.7224	28.8067	26.9365	32.6313	34.7179	33.7303	34.3385	38.5798	39.6074	34.4619	37.9555	33.0442	34.139	32.0394	30.6283	28.5884
179	22.8863	16.3749	20.9679	20.2713	20.9796	21.5626	22.2982	22.9764	24.6691	26.8676	28.2182	29.6557	31.9306	33.103	32.3945	32.5922	27.0716	29.3689	26.8211	27.9177	25.5164	25.144	24.4192	22.6863	20.7491	19.5623	16.3051	18.7482	20.9061	19.0437	20.504	18.0702	23.1672	22.4953	26.79	24.7036	30.5603	32.444	32.1287	32.7999	36.0466	36.7681	31.3879	35.0513	29.7837	30.6868	28.6885	27.0078	25.0286
180	19.8733	14.0178	20.341	20.2638	22.4949	23.6739	24.9049	25.6478	27.9692	30.2393	31.8224	33.1292	35.694	36.9315	35.9158	35.9277	30.3608	32.1252	29.2519	29.9853	26.8784	25.9767	23.8311	21.509	18.3674	16.4543	12.8111	14.7504	17.0382	16.8175	18.6015	18.5754	22.7706	23.9635	27.5881	26.7582	32.437	34.7315	34.5104	35.9893	38.7226	39.5693	34.1479	38.3477	32.8516	33.5181	31.1829	29.5354	27.9337
181	23.6331	17.639	23.711	23.5825	25.6842	26.9593	28.3885	29.0341	31.5095	33.7931	35.3336	36.3782	39.0413	40.3544	39.3878	39.4426	33.7826	35.6348	32.6495	33.2131	30.1156	29.2705	27.328	25.0116	22.1037	20.0818	16.4989	18.4548	20.5415	19.7494	21.6756	21.7706	26.0441	27.1989	30.8837	29.9521	35.6575	37.9851	37.9125	39.5602	42.0494	42.8559	37.3605	41.6882	36.0727	36.5512	34.1519	32.3452	30.9445
182	23.6285	17.6435	23.5387	22.0695	24.6875	25.0485	26.6927	26.5634	29.3389	31.4343	32.4952	32.7716	35.6824	37.2668	36.5045	36.8734	30.8644	33.7685	30.7749	31.5496	28.8275	27.7898	26.254	23.604	20.9944	18.712	15.5417	17.178	18.6617	17.0978	19.1438	18.9527	23.8052	24.9315	28.6809	27.7427	33.52	35.66	36.2285	37.4993	39.3866	39.8538	34.1581	38.402	32.605	32.7535	30.5229	28.2907	27.0641
183	25.5976	19.4854	25.2484	23.9354	26.1535	26.4801	27.6315	27.8932	29.577	31.584	32.5354	33.3982	35.7049	37.0551	36.7797	37.2938	31.5411	34.6293	32.0563	33.0472	30.3994	29.5334	28.148	25.6028	23.0578	20.8799	17.6443	19.452	20.9035	19.3046	21.3271	20.8216	25.8199	26.5908	30.4876	29.2637	35.0947	37.125	37.4613	37.8436	40.7203	41.1594	35.4889	39.2176	33.7747	34.0504	31.9822	29.7068	28.2977
184	28.4175	22.4104	28.4001	27.2434	29.548	29.9796	31.3258	31.3836	33.2237	35.1321	35.7649	36.3397	38.7183	40.1906	40.1082	40.7814	34.8962	38.2766	35.5791	36.5312	33.8262	32.9339	31.3932	28.7515	26.0415	23.66	20.3637	21.9406	23.4621	22.0799	24.2126	24.1971	29.0522	30.0699	33.9045	32.772	38.596	40.6413	41.0229	41.5278	44.1365	44.4541	38.7519	42.3461	36.855	37.0582	35.15	32.67	31.2782
187	30.5084	25.0039	30.9867	29.0003	31.9356	31.7684	33.3392	32.6554	35.1828	36.9625	36.9084	36.6617	39.1287	41.194	41.3013	42.2852	36.1097	39.9194	37.3387	38.3437	35.8928	34.6988	33.2149	30.2465	27.7184	24.8396	21.476	22.8432	23.8479	22.5484	24.7918	25.1677	30.0976	31.4564	35.1236	34.2268	39.9687	41.8915	42.8519	43.4469	45.1829	45.1772	39.3775	42.7188	37.2239	36.9797	35.3329	32.377	31.3209
188	28.7287	23.2473	28.7596	26.2666	29.1365	28.5022	30.0607	29.0208	31.598	33.2799	33.3243	33.0225	35.7581	37.7275	37.6361	38.5487	32.3352	36.3042	33.9273	35.0847	32.9035	31.7627	30.5721	27.6102	25.5207	22.7989	19.7048	21.355	21.7299	20.1745	22.2841	21.9668	27.1867	28.1458	31.8763	30.8031	36.5062	38.2707	39.4441	39.8172	41.3478	41.3121	35.5057	38.9875	33.4274	33.1959	31.4736	28.5871	27.5212
189	27.0863	21.9935	27.2927	24.3486	27.5848	26.6816	28.4736	27.0195	29.8139	31.267	30.8486	30.105	32.7384	35.1073	35.1502	36.2698	29.9889	34.3978	32.0079	33.1565	31.0888	29.7546	28.619	25.5247	23.6678	20.8614	17.8994	19.2785	19.4394	17.9388	19.9933	19.7309	24.8987	26.0436	29.6078	28.7554	34.3412	36.1027	37.5911	37.8774	38.9505	38.6642	32.8603	35.9625	30.6195	30.1524	28.6556	25.5206	24.6057
190	22.1137	17.6697	23.3589	20.41	24.4835	23.4693	25.3671	23.5982	26.9216	28.5071	28.4337	27.5768	30.8252	32.9486	32.513	33.4051	27.0544	31.1025	28.5136	29.8597	27.9414	26.0772	24.4645	21.1116	18.8928	15.7072	12.6004	13.9652	14.226	12.8451	15.0649	16.2051	20.6786	22.7079	26.1236	25.3704	30.879	32.5836	34.258	34.8934	35.5678	35.4144	29.5707	33.1325	27.6168	27.0926	25.2765	22.3067	21.5453
191	21.7594	17.8826	22.7463	19.0132	23.3914	22.1544	24.5754	22.3515	26.6169	28.222	28.279	26.9512	30.7277	32.9027	32.0211	32.751	26.3604	29.9603	27.057	28.2222	26.2511	24.2931	23.0238	19.6028	18.0881	15.0679	12.6011	13.981	12.999	11.6288	13.554	14.1043	18.6924	20.622	23.7907	23.7086	28.9592	30.8434	32.9149	34.0214	34.0129	33.8659	28.0188	31.8969	26.4201	25.5237	23.3888	20.4533	20.2543
192	20.076	15.9655	20.0701	16.1307	20.0645	18.7058	21.1861	18.9814	23.4437	25.1307	25.0257	23.2921	27.3253	29.6082	28.5381	29.2845	22.9109	26.5703	23.4942	24.7838	22.8791	21.1731	20.2614	17.1056	15.9228	13.7873	11.973	14.059	12.1797	10.0864	12.0328	10.9322	16.0637	17.3645	20.6051	20.2808	25.4876	27.2098	29.411	30.6079	30.1737	29.9006	24.0757	27.8973	22.5326	21.4293	19.3011	16.29	16.3383
193	18.2337	16.1016	19.5567	14.9562	20.06	18.5262	21.6527	18.7044	23.962	25.7851	25.9076	23.8383	28.1935	30.5234	29.004	29.5282	23.2698	26.167	22.7414	23.7986	21.8777	19.5279	18.513	14.9874	14.1948	11.8591	10.8169	12.0743	9.14878	6.97159	9.19982	9.73958	13.5264	15.5315	18.4892	19.3599	24.0214	26.103	28.6087	30.5059	29.4652	29.2542	23.5274	27.7063	22.4606	20.6753	18.5154	15.7191	16.4235
194	17.906	14.2019	16.9938	12.6284	16.25	14.4753	17.1035	14.3339	19.3043	21.1249	21.4949	20.0529	24.1408	26.259	24.7642	25.1708	18.858	21.9058	18.811	20.183	18.6562	16.9998	16.6615	13.8179	13.2232	12.3208	11.8067	13.733	10.4042	7.67339	9.70215	7.03656	12.278	12.7854	15.9167	15.4807	20.6493	22.4792	24.6682	26.1195	25.74	25.7265	19.9066	24.3645	18.7354	17.4118	15.2713	12.4846	12.7916
195	16.3012	15.8175	17.3365	12.3644	17.5411	15.3616	18.6458	15.069	20.9215	22.8534	23.3273	20.5765	25.3686	27.7354	25.4784	25.7043	19.7102	21.8321	17.735	19.2296	17.6468	14.9222	14.7454	11.7832	12.268	11.95	12.9345	12.2498	7.96849	6.91083	7.68023	7.33999	9.4781	10.6124	13.2671	14.8534	18.7064	20.7572	23.663	25.6759	24.0766	23.8185	18.4278	22.9271	18.1511	15.7793	13.2119	10.9948	12.8953
196	17.2214	15.9634	16.8319	11.8255	15.8094	12.9082	16.1384	11.9275	17.7791	19.5279	20.1468	17.0214	21.9155	24.3015	21.8944	22.159	16.2545	18.5346	14.4146	16.578	15.5441	13.3482	13.7931	11.9018	12.9002	13.7551	15.0847	15.9937	11.7803	9.14103	9.22814	7.33545	9.24685	9.16426	11.3234	11.8111	15.9013	17.6215	20.463	22.3188	20.2474	19.7801	14.4824	18.7986	14.302	11.6165	9.16477	6.95136	9.27061
197	16.4307	15.8803	16.7645	12.3527	16.3146	13.9543	16.7727	13.2143	19.0536	20.913	22.1371	19.222	24.0668	26.2037	23.0116	22.6133	17.3483	18.2142	13.5292	15.0322	14.4041	11.5296	12.2534	11.2775	13.1588	14.1247	16.0353	16.433	11.3474	10.1301	7.50115	7.20943	7.80505	6.96686	8.58956	10.6819	13.8024	15.7465	19.0721	21.0236	19.0394	19.0315	14.4406	19.3466	15.5573	12.7557	9.89285	7.13244	11.4487
198	18.6014	18.1186	18.7735	14.4949	17.4047	14.079	16.6518	11.8418	17.1944	18.1229	17.7631	14.1668	19.1014	21.5125	19.0499	19.4291	14.207	16.812	12.1881	14.9915	15.1578	12.7932	13.9886	13.5143	15.3983	16.4263	18.7021	19.5832	15.0018	13.3159	10.1813	9.42731	10.0188	8.01597	9.05498	10.6908	13.148	14.4572	17.9036	19.5578	16.9717	16.4745	11.3861	15.2392	11.2235	7.90936	6.01663	3.4603	6.02358
199	16.5656	16.2926	16.9413	13.3537	16.2004	13.8781	15.6853	12.5077	17.2229	18.6991	20.184	17.4282	21.921	23.5166	19.7977	18.5695	14.9187	14.0797	9.67911	11.5219	12.1726	10.6111	11.6519	11.8325	14.072	15.5037	18.3417	19.688	14.6015	14.3238	8.49935	8.8597	7.85976	6.66318	5.62323	7.25268	9.33039	10.5358	14.0779	15.7513	13.3303	13.1355	10.4377	14.8986	11.7683	10.2866	7.02772	5.7319	10.4617
200	19.7385	18.0049	17.7828	13.5995	15.0374	11.6568	13.6309	9.38569	14.5857	15.8926	16.6589	13.2828	18.0215	20.1449	16.9452	16.244	12.0458	12.6846	7.93121	11.3752	12.1894	11.2547	13.0585	14.0236	16.1067	17.8765	20.3028	22.1751	18.7729	16.1047	13.6153	11.112	10.2107	6.66841	7.86204	7.12966	9.37178	10.1178	13.3936	14.515	11.4088	10.5218	7.69524	11.7657	8.27859	6.4059	3.58107	3.52999	5.86755
201	23.4561	21.9789	21.4032	17.6936	17.8718	14.7327	15.068	11.8618	14.9777	15.3769	15.8971	13.0634	17.1029	18.3452	14.5614	13.4782	11.1201	10.7269	7.13929	11.1803	12.9913	13.8268	16.0278	17.7278	20.3755	22.5969	25.4152	27.3427	23.1291	21.6831	17.0655	16.0229	14.4281	10.426	10.006	6.96407	7.63226	7.62174	10.708	11.3458	8.21408	7.16878	5.57852	8.97314	6.55397	6.49702	3.29819	6.45241	8.87491
202	26.3549	24.1322	22.8733	18.8517	18.1269	14.3861	14.188	11.4226	13.2483	12.7437	13.6264	10.2787	14.5079	15.2857	11.1573	9.92064	8.24762	8.02799	6.28778	10.55	13.0764	14.936	17.6913	20.142	22.9711	25.5195	28.2627	30.3082	26.5112	24.6464	20.5506	19.0729	17.1834	13.0729	11.5943	7.63373	7.27666	4.67017	7.8973	7.27174	4.18074	3.51881	2.80532	5.90169	3.51408	4.85965	3.29347	6.84817	8.75148
203	23.2247	20.8381	19.306	15.4344	14.8601	11.2446	11.9911	10.3297	12.5148	13.4403	15.263	13.5377	17.1645	17.3054	12.9109	11.3677	9.74399	6.83126	4.97046	7.23413	9.38118	11.1536	14.1436	16.927	20.0263	22.9607	25.8078	28.1737	24.951	23.6527	19.5522	17.4405	14.6145	10.7293	8.18169	4.1561	3.45588	2.7132	5.88783	6.3676	3.62257	3.47088	4.90052	8.21349	7.58768	8.65191	6.09911	9.37579	11.4733
204	20.9179	19.0341	18.0842	14.5093	14.667	11.7267	12.9229	10.6816	14.073	15.0869	16.6785	15.3109	18.8075	19.1671	15.3517	13.3654	11.2245	8.90953	6.09768	7.75046	9.55155	10.454	12.6798	14.8507	17.7789	20.4068	23.3123	25.4856	21.7496	20.5552	15.8928	14.4332	12.0079	7.9448	6.63118	3.59742	4.39693	4.88767	8.13557	9.38275	6.92548	7.18993	7.08225	10.5361	9.57082	9.57456	5.95547	8.63541	10.9467
205	17.2982	15.3562	14.5858	11.004	11.7603	9.50882	10.7643	6.88451	10.9367	11.8991	13.1487	10.9833	15.2636	16.8701	13.1446	12.1682	8.03892	8.31549	3.6978	7.07366	7.58773	7.06734	9.23731	11.2015	14.0266	16.6539	19.5537	21.7668	18.3005	17.1269	13.026	10.8745	8.24345	4.19692	3.26941	2.85845	5.00496	5.83169	8.87258	10.235	7.82004	8.04673	4.33421	9.19648	6.52697	6.07163	3.29593	5.24008	6.45431
206	16.1382	14.8003	14.6953	11.1144	12.8489	10.6168	12.7453	9.71894	14.677	16.4967	18.3003	16.3604	20.75	22.2658	18.4921	17.3241	13.071	12.3018	7.75066	9.23538	9.5591	7.62981	9.4727	10.6461	12.8318	14.7307	17.4683	19.3645	15.589	13.9035	10.0998	8.05461	6.89777	3.36665	4.1369	5.01363	7.45243	9.22326	12.663	14.6377	12.8827	13.2723	9.56386	14.6218	11.9458	10.5106	7.1881	7.26046	10.0401
207	12.5015	11.5417	12.2602	7.78891	11.0224	8.30784	11.4726	8.32943	14.2446	16.611	18.2374	15.8034	20.5263	22.5424	19.3216	18.9215	13.3308	14.5177	10.0799	10.8193	10.0699	7.28057	7.68914	7.05791	9.26224	10.836	13.6058	15.4429	11.7169	10.2147	6.85923	4.13598	3.436	2.84677	5.01795	6.49809	9.79636	12.129	15.3765	17.5346	16.1379	16.5271	11.3745	16.5627	12.2141	10.7552	6.99911	7.20734	8.6138
208	11.9051	12.3667	13.683	9.26789	14.0499	12.4078	15.3394	12.618	18.484	20.7462	22.5232	20.2445	24.975	26.9708	23.6339	23.0281	17.5375	17.9937	13.621	14.0572	12.718	9.51975	9.72284	7.71548	9.22014	9.38108	11.9877	12.5838	7.75677	7.47475	3.64145	3.42808	4.22469	5.40604	7.38184	9.85075	13.2961	15.7419	18.9527	21.1292	19.6857	20.0671	15.3857	20.57	16.5863	14.9223	11.195	10.2652	12.957
209	11.4798	11.2281	13.1502	8.44584	12.8889	10.4018	13.721	10.3009	15.9777	18.1359	19.4838	17.768	22.2586	24.3057	21.7886	21.6996	15.4565	17.558	14.0852	15.2215	13.747	10.6958	10.3457	7.38176	7.52965	7.4597	9.0721	10.084	6.5831	3.6588	3.28776	2.96511	5.09234	6.35487	9.31399	10.616	15.354	17.3925	19.8628	21.9419	21.0336	21.2775	15.6452	20.6798	15.3512	14.4622	11.2392	9.83581	10.2862
210	12.3711	13.4374	15.2852	10.4922	16.1202	14.9566	18.1886	15.5197	21.3147	23.6108	24.951	22.822	27.4819	29.651	27.0573	26.8951	20.7843	22.3621	18.4809	18.9818	16.8564	13.8799	13.0942	9.60842	9.73294	7.93235	9.02917	8.76607	4.29675	3.08224	3.11232	5.20455	7.63098	9.63653	12.719	14.9913	18.8259	21.2673	24.1275	26.3202	25.1429	25.3615	20.0286	25.111	20.149	18.6136	15.2522	13.7218	15.1471
211	12.8821	9.92861	12.4007	7.92838	12.8202	12.0381	15.1343	13.4914	18.53	21.1105	22.9337	22.0568	26.1119	28.0295	25.6887	25.435	19.1737	20.8579	17.7844	17.5417	15.1854	13.0501	11.9896	8.99299	8.15683	7.39342	6.02964	7.51132	5.27665	2.74963	4.96798	3.00664	8.10743	9.6585	12.9088	13.4447	18.5586	21.0524	22.9194	25.466	25.23	25.8126	20.2655	25.3555	19.9675	19.4612	16.2556	14.87	14.8963
212	14.5027	14.2253	17.7454	14.1447	19.6608	18.8544	22.0262	19.6858	24.9081	27.1238	28.036	26.3626	30.7008	32.8717	30.9836	31.1544	24.8287	27.1388	23.8261	24.1001	21.8057	19.0532	17.0874	13.1189	11.6338	7.91222	6.88525	6.46187	3.45533	4.37599	5.74964	8.7522	12.1934	15.0699	18.3621	19.8964	24.5945	26.9722	29.43	31.6399	30.7637	30.9149	25.2621	30.0715	24.62	23.3923	20.4706	18.2038	18.8466
213	18.0674	14.9367	19.9524	16.3213	21.5219	20.9375	23.9576	21.9166	26.7383	28.8779	29.6691	28.3815	32.4875	34.545	33.0188	33.2951	26.96	29.4868	26.421	26.5815	24.1804	21.7764	20.0641	16.4269	14.5858	11.2082	8.70943	9.89154	9.02065	7.74393	9.85216	11.9958	15.7281	18.3453	21.5004	22.3762	27.376	29.7315	31.8661	33.9183	33.5124	33.6796	27.9427	32.6054	27.0317	26.0108	23.2614	20.8427	21.1128
214	21.3702	17.8929	23.2654	19.7637	24.6413	23.9552	26.7377	24.3079	29.1999	30.6834	30.5207	28.5807	32.5389	35.0175	33.9951	34.7463	28.3954	31.8381	28.5654	29.8108	27.4897	25.2452	23.5932	19.9907	18.0335	14.551	11.7107	12.5202	12.2085	11.197	13.3701	15.3064	19.2869	21.7592	24.7341	25.3028	30.155	32.089	34.4925	35.9845	35.1881	34.8739	29.1162	32.8895	27.7318	26.1129	24.1031	21.0366	21.5468
215	24.4506	20.821	26.4963	23.2512	27.9793	27.351	29.9709	28.0352	32.4672	34.1914	34.3935	33.0906	36.8492	39.0313	38.1326	38.7821	32.4065	35.6699	32.7295	33.3221	30.9833	28.8041	27.0943	23.4923	21.3314	17.7121	14.6133	15.0629	15.318	14.5195	16.7694	18.867	22.8628	25.4315	28.5323	28.9941	34.1694	36.3216	38.3693	39.8705	39.7656	39.7017	33.8776	37.9021	32.4527	31.4228	29.1298	26.2439	26.292
216	25.9623	23.3703	28.5771	25.1872	30.3949	29.5746	32.2166	30.0268	34.4874	36.0949	36.0246	34.4777	38.0708	40.5322	39.7778	40.5575	34.1658	37.6463	34.4132	35.2312	33.0235	30.4765	28.6966	24.8833	22.9383	19.0318	16.232	15.7928	15.6419	15.5973	17.6972	20.5369	24.0182	26.6552	29.8248	30.876	35.6614	37.8092	40.2617	41.7964	41.1278	40.8864	35.1511	38.9684	33.8617	32.0543	30.1033	27.0957	27.6729
217	27.1158	24.891	29.7008	25.8954	31.2278	29.7848	32.643	29.6425	34.5787	35.9016	35.3738	33.0814	36.7211	39.6336	38.8351	39.7544	33.4464	37.0706	33.5675	35.1468	33.2462	30.7325	29.3063	25.4783	23.9244	20.1091	17.6527	17.1282	16.2989	16.4551	18.3432	20.959	24.3374	26.629	29.6458	30.5169	35.1673	37.0505	39.6045	41.1521	39.9408	39.415	33.7708	37.1299	32.3447	29.8893	28.5785	25.3345	26.1963
[truncated: 163 more columns]
