# Supplementary material for: Heterogeneity of the GFP fitness landscape and data-driven protein design
Source: eLife. 2022 May 5;11:e75842. doi: 10.7554/eLife.75842 (PMC9119679; doi:10.7554/eLife.75842)
Supplement: Source data 6. — Blank control values are already subtracted. Absorbance and fluorescence data are listed on separate tabs [file elife-75842-data6.xlsx]

## Sheet: absorbance
Wavelength	t	well	signal	signal_normalized	gene	treatment	peak
300	0	A2	0.06	0.163043	amac	urea	FALSE
305	0	A2	0.041	0.111413	amac	urea	FALSE
310	0	A2	0.035	0.0951087	amac	urea	FALSE
315	0	A2	0.033	0.0896739	amac	urea	FALSE
320	0	A2	0.033	0.0896739	amac	urea	FALSE
325	0	A2	0.033	0.0896739	amac	urea	FALSE
330	0	A2	0.036	0.0978261	amac	urea	FALSE
335	0	A2	0.037	0.100543	amac	urea	FALSE
340	0	A2	0.045	0.122283	amac	urea	FALSE
345	0	A2	0.055	0.149457	amac	urea	FALSE
350	0	A2	0.071	0.192935	amac	urea	FALSE
355	0	A2	0.088	0.23913	amac	urea	FALSE
360	0	A2	0.106	0.288043	amac	urea	FALSE
365	0	A2	0.128	0.347826	amac	urea	FALSE
370	0	A2	0.155	0.421196	amac	urea	FALSE
375	0	A2	0.181	0.491848	amac	urea	FALSE
380	0	A2	0.198	0.538043	amac	urea	FALSE
385	0	A2	0.215	0.584239	amac	urea	FALSE
390	0	A2	0.229	0.622283	amac	urea	FALSE
395	0	A2	0.236	0.641304	amac	urea	FALSE
400	0	A2	0.233	0.633152	amac	urea	FALSE
405	0	A2	0.222	0.603261	amac	urea	FALSE
410	0	A2	0.203	0.55163	amac	urea	FALSE
415	0	A2	0.179	0.486413	amac	urea	FALSE
420	0	A2	0.152	0.413043	amac	urea	FALSE
425	0	A2	0.127	0.345109	amac	urea	FALSE
430	0	A2	0.102	0.277174	amac	urea	FALSE
435	0	A2	0.082	0.222826	amac	urea	FALSE
440	0	A2	0.073	0.19837	amac	urea	FALSE
445	0	A2	0.078	0.211957	amac	urea	FALSE
450	0	A2	0.088	0.23913	amac	urea	FALSE
455	0	A2	0.11	0.298913	amac	urea	FALSE
460	0	A2	0.141	0.383152	amac	urea	FALSE
465	0	A2	0.175	0.475543	amac	urea	FALSE
470	0	A2	0.202	0.548913	amac	urea	FALSE
475	0	A2	0.216	0.586957	amac	urea	FALSE
480	0	A2	0.237	0.644022	amac	urea	FALSE
485	0	A2	0.27	0.733696	amac	urea	FALSE
490	0	A2	0.319	0.866848	amac	urea	FALSE
495	0	A2	0.364	0.98913	amac	urea	TRUE
500	0	A2	0.365	0.991848	amac	urea	FALSE
505	0	A2	0.293	0.796196	amac	urea	FALSE
510	0	A2	0.165	0.44837	amac	urea	FALSE
515	0	A2	0.065	0.17663	amac	urea	FALSE
520	0	A2	0.025	0.0679348	amac	urea	FALSE
525	0	A2	0.009	0.0244565	amac	urea	FALSE
530	0	A2	0.004	0.0108696	amac	urea	FALSE
535	0	A2	0.003	0.00815217	amac	urea	FALSE
540	0	A2	0.002	0.00543478	amac	urea	FALSE
545	0	A2	0.002	0.00543478	amac	urea	FALSE
550	0	A2	0.001	0.00271739	amac	urea	FALSE
555	0	A2	0.001	0.00271739	amac	urea	FALSE
560	0	A2	0.002	0.00543478	amac	urea	FALSE
565	0	A2	0.001	0.00271739	amac	urea	FALSE
570	0	A2	0.002	0.00543478	amac	urea	FALSE
575	0	A2	0.002	0.00543478	amac	urea	FALSE
580	0	A2	0.002	0.00543478	amac	urea	FALSE
585	0	A2	0.002	0.00543478	amac	urea	FALSE
590	0	A2	0.002	0.00543478	amac	urea	FALSE
595	0	A2	0.001	0.00271739	amac	urea	FALSE
600	0	A2	0.002	0.00543478	amac	urea	FALSE
605	0	A2	0.002	0.00543478	amac	urea	FALSE
610	0	A2	0.001	0.00271739	amac	urea	FALSE
615	0	A2	0.002	0.00543478	amac	urea	FALSE
620	0	A2	0.002	0.00543478	amac	urea	FALSE
625	0	A2	0.002	0.00543478	amac	urea	FALSE
630	0	A2	0.002	0.00543478	amac	urea	FALSE
635	0	A2	0.001	0.00271739	amac	urea	FALSE
640	0	A2	0.002	0.00543478	amac	urea	FALSE
645	0	A2	0.002	0.00543478	amac	urea	FALSE
650	0	A2	0.002	0.00543478	amac	urea	FALSE
655	0	A2	0.001	0.00271739	amac	urea	FALSE
660	0	A2	0.001	0.00271739	amac	urea	FALSE
665	0	A2	0.002	0.00543478	amac	urea	FALSE
670	0	A2	0.002	0.00543478	amac	urea	FALSE
675	0	A2	0.002	0.00543478	amac	urea	FALSE
680	0	A2	0.002	0.00543478	amac	urea	FALSE
685	0	A2	0.002	0.00543478	amac	urea	FALSE
690	0	A2	0.002	0.00543478	amac	urea	FALSE
695	0	A2	0.002	0.00543478	amac	urea	FALSE
700	0	A2	0.002	0.00543478	amac	urea	FALSE
300	1	A2	0.06	0.163043	amac	urea	FALSE
305	1	A2	0.045	0.122283	amac	urea	FALSE
310	1	A2	0.036	0.0978261	amac	urea	FALSE
315	1	A2	0.035	0.0951087	amac	urea	FALSE
320	1	A2	0.034	0.0923913	amac	urea	FALSE
325	1	A2	0.035	0.0951087	amac	urea	FALSE
330	1	A2	0.036	0.0978261	amac	urea	FALSE
335	1	A2	0.038	0.103261	amac	urea	FALSE
340	1	A2	0.043	0.116848	amac	urea	FALSE
345	1	A2	0.054	0.146739	amac	urea	FALSE
350	1	A2	0.067	0.182065	amac	urea	FALSE
355	1	A2	0.084	0.228261	amac	urea	FALSE
360	1	A2	0.1	0.271739	amac	urea	FALSE
365	1	A2	0.12	0.326087	amac	urea	FALSE
370	1	A2	0.147	0.399457	amac	urea	FALSE
375	1	A2	0.169	0.459239	amac	urea	FALSE
380	1	A2	0.186	0.505435	amac	urea	FALSE
385	1	A2	0.201	0.546196	amac	urea	FALSE
390	1	A2	0.214	0.581522	amac	urea	FALSE
395	1	A2	0.22	0.597826	amac	urea	FALSE
400	1	A2	0.217	0.589674	amac	urea	FALSE
405	1	A2	0.207	0.5625	amac	urea	FALSE
410	1	A2	0.191	0.519022	amac	urea	FALSE
415	1	A2	0.169	0.459239	amac	urea	FALSE
420	1	A2	0.145	0.394022	amac	urea	FALSE
425	1	A2	0.123	0.334239	amac	urea	FALSE
430	1	A2	0.102	0.277174	amac	urea	FALSE
435	1	A2	0.085	0.230978	amac	urea	FALSE
440	1	A2	0.079	0.214674	amac	urea	FALSE
445	1	A2	0.084	0.228261	amac	urea	FALSE
450	1	A2	0.097	0.263587	amac	urea	FALSE
455	1	A2	0.118	0.320652	amac	urea	FALSE
460	1	A2	0.15	0.407609	amac	urea	FALSE
465	1	A2	0.183	0.497283	amac	urea	FALSE
470	1	A2	0.21	0.570652	amac	urea	FALSE
475	1	A2	0.226	0.61413	amac	urea	FALSE
480	1	A2	0.249	0.67663	amac	urea	FALSE
485	1	A2	0.28	0.76087	amac	urea	FALSE
490	1	A2	0.329	0.894022	amac	urea	FALSE
495	1	A2	0.368	1	amac	urea	TRUE
500	1	A2	0.364	0.98913	amac	urea	FALSE
505	1	A2	0.293	0.796196	amac	urea	FALSE
510	1	A2	0.17	0.461957	amac	urea	FALSE
515	1	A2	0.071	0.192935	amac	urea	FALSE
520	1	A2	0.029	0.0788043	amac	urea	FALSE
525	1	A2	0.011	0.0298913	amac	urea	FALSE
530	1	A2	0.005	0.013587	amac	urea	FALSE
535	1	A2	0.003	0.00815217	amac	urea	FALSE
540	1	A2	0.002	0.00543478	amac	urea	FALSE
545	1	A2	0.002	0.00543478	amac	urea	FALSE
550	1	A2	0.002	0.00543478	amac	urea	FALSE
555	1	A2	0.001	0.00271739	amac	urea	FALSE
560	1	A2	0.002	0.00543478	amac	urea	FALSE
565	1	A2	0.002	0.00543478	amac	urea	FALSE
570	1	A2	0.002	0.00543478	amac	urea	FALSE
575	1	A2	0.001	0.00271739	amac	urea	FALSE
580	1	A2	0.002	0.00543478	amac	urea	FALSE
585	1	A2	0.002	0.00543478	amac	urea	FALSE
590	1	A2	0.001	0.00271739	amac	urea	FALSE
595	1	A2	0.002	0.00543478	amac	urea	FALSE
600	1	A2	0.002	0.00543478	amac	urea	FALSE
605	1	A2	0.002	0.00543478	amac	urea	FALSE
610	1	A2	0.002	0.00543478	amac	urea	FALSE
615	1	A2	0.002	0.00543478	amac	urea	FALSE
620	1	A2	0.002	0.00543478	amac	urea	FALSE
625	1	A2	0.002	0.00543478	amac	urea	FALSE
630	1	A2	0.002	0.00543478	amac	urea	FALSE
635	1	A2	0.002	0.00543478	amac	urea	FALSE
640	1	A2	0.002	0.00543478	amac	urea	FALSE
645	1	A2	0.002	0.00543478	amac	urea	FALSE
650	1	A2	0.001	0.00271739	amac	urea	FALSE
655	1	A2	0.001	0.00271739	amac	urea	FALSE
660	1	A2	0.002	0.00543478	amac	urea	FALSE
665	1	A2	0.002	0.00543478	amac	urea	FALSE
670	1	A2	0.002	0.00543478	amac	urea	FALSE
675	1	A2	0.002	0.00543478	amac	urea	FALSE
680	1	A2	0.002	0.00543478	amac	urea	FALSE
685	1	A2	0.002	0.00543478	amac	urea	FALSE
690	1	A2	0.002	0.00543478	amac	urea	FALSE
695	1	A2	0.001	0.00271739	amac	urea	FALSE
700	1	A2	0.001	0.00271739	amac	urea	FALSE
300	2	A2	0.06	0.163043	amac	urea	FALSE
305	2	A2	0.043	0.116848	amac	urea	FALSE
310	2	A2	0.036	0.0978261	amac	urea	FALSE
315	2	A2	0.035	0.0951087	amac	urea	FALSE
320	2	A2	0.035	0.0951087	amac	urea	FALSE
325	2	A2	0.034	0.0923913	amac	urea	FALSE
330	2	A2	0.036	0.0978261	amac	urea	FALSE
335	2	A2	0.038	0.103261	amac	urea	FALSE
340	2	A2	0.043	0.116848	amac	urea	FALSE
345	2	A2	0.054	0.146739	amac	urea	FALSE
350	2	A2	0.068	0.184783	amac	urea	FALSE
355	2	A2	0.084	0.228261	amac	urea	FALSE
360	2	A2	0.1	0.271739	amac	urea	FALSE
365	2	A2	0.121	0.328804	amac	urea	FALSE
370	2	A2	0.146	0.396739	amac	urea	FALSE
375	2	A2	0.168	0.456522	amac	urea	FALSE
380	2	A2	0.185	0.502717	amac	urea	FALSE
385	2	A2	0.2	0.543478	amac	urea	FALSE
390	2	A2	0.213	0.578804	amac	urea	FALSE
395	2	A2	0.218	0.592391	amac	urea	FALSE
400	2	A2	0.216	0.586957	amac	urea	FALSE
405	2	A2	0.206	0.559783	amac	urea	FALSE
410	2	A2	0.19	0.516304	amac	urea	FALSE
415	2	A2	0.168	0.456522	amac	urea	FALSE
420	2	A2	0.143	0.388587	amac	urea	FALSE
425	2	A2	0.122	0.331522	amac	urea	FALSE
430	2	A2	0.101	0.274457	amac	urea	FALSE
435	2	A2	0.085	0.230978	amac	urea	FALSE
440	2	A2	0.079	0.214674	amac	urea	FALSE
445	2	A2	0.084	0.228261	amac	urea	FALSE
450	2	A2	0.096	0.26087	amac	urea	FALSE
455	2	A2	0.119	0.32337	amac	urea	FALSE
460	2	A2	0.149	0.404891	amac	urea	FALSE
465	2	A2	0.182	0.494565	amac	urea	FALSE
470	2	A2	0.209	0.567935	amac	urea	FALSE
475	2	A2	0.224	0.608696	amac	urea	FALSE
480	2	A2	0.246	0.668478	amac	urea	FALSE
485	2	A2	0.277	0.752717	amac	urea	FALSE
490	2	A2	0.325	0.883152	amac	urea	FALSE
495	2	A2	0.362	0.983696	amac	urea	TRUE
500	2	A2	0.359	0.975543	amac	urea	FALSE
505	2	A2	0.289	0.785326	amac	urea	FALSE
510	2	A2	0.167	0.453804	amac	urea	FALSE
515	2	A2	0.071	0.192935	amac	urea	FALSE
520	2	A2	0.029	0.0788043	amac	urea	FALSE
525	2	A2	0.011	0.0298913	amac	urea	FALSE
530	2	A2	0.005	0.013587	amac	urea	FALSE
535	2	A2	0.003	0.00815217	amac	urea	FALSE
540	2	A2	0.001	0.00271739	amac	urea	FALSE
545	2	A2	0.002	0.00543478	amac	urea	FALSE
550	2	A2	0.002	0.00543478	amac	urea	FALSE
555	2	A2	0.001	0.00271739	amac	urea	FALSE
560	2	A2	0.002	0.00543478	amac	urea	FALSE
565	2	A2	0.002	0.00543478	amac	urea	FALSE
570	2	A2	0.002	0.00543478	amac	urea	FALSE
575	2	A2	0.002	0.00543478	amac	urea	FALSE
580	2	A2	0.001	0.00271739	amac	urea	FALSE
585	2	A2	0.002	0.00543478	amac	urea	FALSE
590	2	A2	0.001	0.00271739	amac	urea	FALSE
595	2	A2	0.001	0.00271739	amac	urea	FALSE
600	2	A2	0.002	0.00543478	amac	urea	FALSE
605	2	A2	0.002	0.00543478	amac	urea	FALSE
610	2	A2	0.002	0.00543478	amac	urea	FALSE
615	2	A2	0.002	0.00543478	amac	urea	FALSE
620	2	A2	0.001	0.00271739	amac	urea	FALSE
625	2	A2	0.001	0.00271739	amac	urea	FALSE
630	2	A2	0.002	0.00543478	amac	urea	FALSE
635	2	A2	0.002	0.00543478	amac	urea	FALSE
640	2	A2	0.002	0.00543478	amac	urea	FALSE
645	2	A2	0.001	0.00271739	amac	urea	FALSE
650	2	A2	0.001	0.00271739	amac	urea	FALSE
655	2	A2	0.001	0.00271739	amac	urea	FALSE
660	2	A2	0.002	0.00543478	amac	urea	FALSE
665	2	A2	0.002	0.00543478	amac	urea	FALSE
670	2	A2	0.002	0.00543478	amac	urea	FALSE
675	2	A2	0.002	0.00543478	amac	urea	FALSE
680	2	A2	0.001	0.00271739	amac	urea	FALSE
685	2	A2	0.002	0.00543478	amac	urea	FALSE
690	2	A2	0.001	0.00271739	amac	urea	FALSE
695	2	A2	0.002	0.00543478	amac	urea	FALSE
700	2	A2	0.002	0.00543478	amac	urea	FALSE
300	3	A2	0.06	0.163043	amac	urea	FALSE
305	3	A2	0.044	0.119565	amac	urea	FALSE
310	3	A2	0.038	0.103261	amac	urea	FALSE
315	3	A2	0.036	0.0978261	amac	urea	FALSE
320	3	A2	0.036	0.0978261	amac	urea	FALSE
325	3	A2	0.036	0.0978261	amac	urea	FALSE
330	3	A2	0.037	0.100543	amac	urea	FALSE
335	3	A2	0.039	0.105978	amac	urea	FALSE
340	3	A2	0.044	0.119565	amac	urea	FALSE
345	3	A2	0.055	0.149457	amac	urea	FALSE
350	3	A2	0.069	0.1875	amac	urea	FALSE
355	3	A2	0.083	0.225543	amac	urea	FALSE
360	3	A2	0.101	0.274457	amac	urea	FALSE
365	3	A2	0.121	0.328804	amac	urea	FALSE
370	3	A2	0.146	0.396739	amac	urea	FALSE
375	3	A2	0.169	0.459239	amac	urea	FALSE
380	3	A2	0.184	0.5	amac	urea	FALSE
385	3	A2	0.2	0.543478	amac	urea	FALSE
390	3	A2	0.214	0.581522	amac	urea	FALSE
395	3	A2	0.219	0.595109	amac	urea	FALSE
400	3	A2	0.215	0.584239	amac	urea	FALSE
405	3	A2	0.206	0.559783	amac	urea	FALSE
410	3	A2	0.19	0.516304	amac	urea	FALSE
415	3	A2	0.167	0.453804	amac	urea	FALSE
420	3	A2	0.143	0.388587	amac	urea	FALSE
425	3	A2	0.123	0.334239	amac	urea	FALSE
430	3	A2	0.101	0.274457	amac	urea	FALSE
435	3	A2	0.086	0.233696	amac	urea	FALSE
440	3	A2	0.08	0.217391	amac	urea	FALSE
445	3	A2	0.084	0.228261	amac	urea	FALSE
450	3	A2	0.098	0.266304	amac	urea	FALSE
455	3	A2	0.119	0.32337	amac	urea	FALSE
460	3	A2	0.147	0.399457	amac	urea	FALSE
465	3	A2	0.182	0.494565	amac	urea	FALSE
470	3	A2	0.207	0.5625	amac	urea	FALSE
475	3	A2	0.221	0.600543	amac	urea	FALSE
480	3	A2	0.244	0.663043	amac	urea	FALSE
485	3	A2	0.274	0.744565	amac	urea	FALSE
490	3	A2	0.321	0.872283	amac	urea	FALSE
495	3	A2	0.358	0.972826	amac	urea	TRUE
500	3	A2	0.353	0.959239	amac	urea	FALSE
505	3	A2	0.284	0.771739	amac	urea	FALSE
510	3	A2	0.164	0.445652	amac	urea	FALSE
515	3	A2	0.07	0.190217	amac	urea	FALSE
520	3	A2	0.029	0.0788043	amac	urea	FALSE
525	3	A2	0.01	0.0271739	amac	urea	FALSE
530	3	A2	0.006	0.0163043	amac	urea	FALSE
535	3	A2	0.004	0.0108696	amac	urea	FALSE
540	3	A2	0.002	0.00543478	amac	urea	FALSE
545	3	A2	0.002	0.00543478	amac	urea	FALSE
550	3	A2	0.002	0.00543478	amac	urea	FALSE
555	3	A2	0.003	0.00815217	amac	urea	FALSE
560	3	A2	0.002	0.00543478	amac	urea	FALSE
565	3	A2	0.003	0.00815217	amac	urea	FALSE
570	3	A2	0.002	0.00543478	amac	urea	FALSE
575	3	A2	0.002	0.00543478	amac	urea	FALSE
580	3	A2	0.002	0.00543478	amac	urea	FALSE
585	3	A2	0.002	0.00543478	amac	urea	FALSE
590	3	A2	0.003	0.00815217	amac	urea	FALSE
595	3	A2	0.002	0.00543478	amac	urea	FALSE
600	3	A2	0.003	0.00815217	amac	urea	FALSE
605	3	A2	0.003	0.00815217	amac	urea	FALSE
610	3	A2	0.002	0.00543478	amac	urea	FALSE
615	3	A2	0.003	0.00815217	amac	urea	FALSE
620	3	A2	0.002	0.00543478	amac	urea	FALSE
625	3	A2	0.003	0.00815217	amac	urea	FALSE
630	3	A2	0.003	0.00815217	amac	urea	FALSE
635	3	A2	0.003	0.00815217	amac	urea	FALSE
640	3	A2	0.003	0.00815217	amac	urea	FALSE
645	3	A2	0.002	0.00543478	amac	urea	FALSE
650	3	A2	0.002	0.00543478	amac	urea	FALSE
655	3	A2	0.002	0.00543478	amac	urea	FALSE
660	3	A2	0.003	0.00815217	amac	urea	FALSE
665	3	A2	0.003	0.00815217	amac	urea	FALSE
670	3	A2	0.003	0.00815217	amac	urea	FALSE
675	3	A2	0.002	0.00543478	amac	urea	FALSE
680	3	A2	0.002	0.00543478	amac	urea	FALSE
685	3	A2	0.002	0.00543478	amac	urea	FALSE
690	3	A2	0.002	0.00543478	amac	urea	FALSE
695	3	A2	0.002	0.00543478	amac	urea	FALSE
700	3	A2	0.002	0.00543478	amac	urea	FALSE
300	4	A2	0.061	0.165761	amac	urea	FALSE
305	4	A2	0.045	0.122283	amac	urea	FALSE
310	4	A2	0.039	0.105978	amac	urea	FALSE
315	4	A2	0.038	0.103261	amac	urea	FALSE
320	4	A2	0.038	0.103261	amac	urea	FALSE
325	4	A2	0.037	0.100543	amac	urea	FALSE
330	4	A2	0.037	0.100543	amac	urea	FALSE
335	4	A2	0.041	0.111413	amac	urea	FALSE
340	4	A2	0.046	0.125	amac	urea	FALSE
345	4	A2	0.056	0.152174	amac	urea	FALSE
350	4	A2	0.07	0.190217	amac	urea	FALSE
355	4	A2	0.085	0.230978	amac	urea	FALSE
360	4	A2	0.102	0.277174	amac	urea	FALSE
365	4	A2	0.123	0.334239	amac	urea	FALSE
370	4	A2	0.148	0.402174	amac	urea	FALSE
375	4	A2	0.17	0.461957	amac	urea	FALSE
380	4	A2	0.186	0.505435	amac	urea	FALSE
385	4	A2	0.202	0.548913	amac	urea	FALSE
390	4	A2	0.213	0.578804	amac	urea	FALSE
395	4	A2	0.219	0.595109	amac	urea	FALSE
400	4	A2	0.216	0.586957	amac	urea	FALSE
405	4	A2	0.206	0.559783	amac	urea	FALSE
410	4	A2	0.19	0.516304	amac	urea	FALSE
415	4	A2	0.168	0.456522	amac	urea	FALSE
420	4	A2	0.144	0.391304	amac	urea	FALSE
425	4	A2	0.123	0.334239	amac	urea	FALSE
430	4	A2	0.102	0.277174	amac	urea	FALSE
435	4	A2	0.087	0.236413	amac	urea	FALSE
440	4	A2	0.08	0.217391	amac	urea	FALSE
445	4	A2	0.085	0.230978	amac	urea	FALSE
450	4	A2	0.096	0.26087	amac	urea	FALSE
455	4	A2	0.119	0.32337	amac	urea	FALSE
460	4	A2	0.147	0.399457	amac	urea	FALSE
465	4	A2	0.18	0.48913	amac	urea	FALSE
470	4	A2	0.206	0.559783	amac	urea	FALSE
475	4	A2	0.22	0.597826	amac	urea	FALSE
480	4	A2	0.242	0.657609	amac	urea	FALSE
485	4	A2	0.271	0.736413	amac	urea	FALSE
490	4	A2	0.318	0.86413	amac	urea	FALSE
495	4	A2	0.353	0.959239	amac	urea	TRUE
500	4	A2	0.35	0.951087	amac	urea	FALSE
505	4	A2	0.281	0.763587	amac	urea	FALSE
510	4	A2	0.163	0.442935	amac	urea	FALSE
515	4	A2	0.07	0.190217	amac	urea	FALSE
520	4	A2	0.029	0.0788043	amac	urea	FALSE
525	4	A2	0.012	0.0326087	amac	urea	FALSE
530	4	A2	0.006	0.0163043	amac	urea	FALSE
535	4	A2	0.003	0.00815217	amac	urea	FALSE
540	4	A2	0.003	0.00815217	amac	urea	FALSE
545	4	A2	0.003	0.00815217	amac	urea	FALSE
550	4	A2	0.003	0.00815217	amac	urea	FALSE
555	4	A2	0.003	0.00815217	amac	urea	FALSE
560	4	A2	0.003	0.00815217	amac	urea	FALSE
565	4	A2	0.003	0.00815217	amac	urea	FALSE
570	4	A2	0.003	0.00815217	amac	urea	FALSE
575	4	A2	0.003	0.00815217	amac	urea	FALSE
580	4	A2	0.003	0.00815217	amac	urea	FALSE
585	4	A2	0.003	0.00815217	amac	urea	FALSE
590	4	A2	0.003	0.00815217	amac	urea	FALSE
595	4	A2	0.003	0.00815217	amac	urea	FALSE
600	4	A2	0.003	0.00815217	amac	urea	FALSE
605	4	A2	0.003	0.00815217	amac	urea	FALSE
610	4	A2	0.003	0.00815217	amac	urea	FALSE
615	4	A2	0.003	0.00815217	amac	urea	FALSE
620	4	A2	0.003	0.00815217	amac	urea	FALSE
625	4	A2	0.003	0.00815217	amac	urea	FALSE
630	4	A2	0.003	0.00815217	amac	urea	FALSE
635	4	A2	0.004	0.0108696	amac	urea	FALSE
640	4	A2	0.003	0.00815217	amac	urea	FALSE
645	4	A2	0.003	0.00815217	amac	urea	FALSE
650	4	A2	0.003	0.00815217	amac	urea	FALSE
655	4	A2	0.003	0.00815217	amac	urea	FALSE
660	4	A2	0.003	0.00815217	amac	urea	FALSE
665	4	A2	0.003	0.00815217	amac	urea	FALSE
670	4	A2	0.003	0.00815217	amac	urea	FALSE
675	4	A2	0.003	0.00815217	amac	urea	FALSE
680	4	A2	0.003	0.00815217	amac	urea	FALSE
685	4	A2	0.003	0.00815217	amac	urea	FALSE
690	4	A2	0.003	0.00815217	amac	urea	FALSE
695	4	A2	0.003	0.00815217	amac	urea	FALSE
700	4	A2	0.003	0.00815217	amac	urea	FALSE
300	5	A2	0.061	0.165761	amac	urea	FALSE
305	5	A2	0.047	0.127717	amac	urea	FALSE
310	5	A2	0.038	0.103261	amac	urea	FALSE
315	5	A2	0.037	0.100543	amac	urea	FALSE
320	5	A2	0.037	0.100543	amac	urea	FALSE
325	5	A2	0.037	0.100543	amac	urea	FALSE
330	5	A2	0.039	0.105978	amac	urea	FALSE
335	5	A2	0.04	0.108696	amac	urea	FALSE
340	5	A2	0.045	0.122283	amac	urea	FALSE
345	5	A2	0.056	0.152174	amac	urea	FALSE
350	5	A2	0.07	0.190217	amac	urea	FALSE
355	5	A2	0.085	0.230978	amac	urea	FALSE
360	5	A2	0.103	0.279891	amac	urea	FALSE
365	5	A2	0.123	0.334239	amac	urea	FALSE
370	5	A2	0.147	0.399457	amac	urea	FALSE
375	5	A2	0.17	0.461957	amac	urea	FALSE
380	5	A2	0.185	0.502717	amac	urea	FALSE
385	5	A2	0.201	0.546196	amac	urea	FALSE
390	5	A2	0.213	0.578804	amac	urea	FALSE
395	5	A2	0.218	0.592391	amac	urea	FALSE
400	5	A2	0.215	0.584239	amac	urea	FALSE
405	5	A2	0.206	0.559783	amac	urea	FALSE
410	5	A2	0.189	0.513587	amac	urea	FALSE
415	5	A2	0.168	0.456522	amac	urea	FALSE
420	5	A2	0.143	0.388587	amac	urea	FALSE
425	5	A2	0.122	0.331522	amac	urea	FALSE
430	5	A2	0.102	0.277174	amac	urea	FALSE
435	5	A2	0.086	0.233696	amac	urea	FALSE
440	5	A2	0.079	0.214674	amac	urea	FALSE
445	5	A2	0.085	0.230978	amac	urea	FALSE
450	5	A2	0.097	0.263587	amac	urea	FALSE
455	5	A2	0.118	0.320652	amac	urea	FALSE
460	5	A2	0.145	0.394022	amac	urea	FALSE
465	5	A2	0.178	0.483696	amac	urea	FALSE
470	5	A2	0.203	0.55163	amac	urea	FALSE
475	5	A2	0.217	0.589674	amac	urea	FALSE
480	5	A2	0.238	0.646739	amac	urea	FALSE
485	5	A2	0.267	0.725543	amac	urea	FALSE
490	5	A2	0.313	0.850543	amac	urea	FALSE
495	5	A2	0.348	0.945652	amac	urea	TRUE
500	5	A2	0.344	0.934783	amac	urea	FALSE
505	5	A2	0.275	0.747283	amac	urea	FALSE
510	5	A2	0.16	0.434783	amac	urea	FALSE
515	5	A2	0.068	0.184783	amac	urea	FALSE
520	5	A2	0.029	0.0788043	amac	urea	FALSE
525	5	A2	0.012	0.0326087	amac	urea	FALSE
530	5	A2	0.007	0.0190217	amac	urea	FALSE
535	5	A2	0.004	0.0108696	amac	urea	FALSE
540	5	A2	0.003	0.00815217	amac	urea	FALSE
545	5	A2	0.003	0.00815217	amac	urea	FALSE
550	5	A2	0.003	0.00815217	amac	urea	FALSE
555	5	A2	0.003	0.00815217	amac	urea	FALSE
560	5	A2	0.003	0.00815217	amac	urea	FALSE
565	5	A2	0.002	0.00543478	amac	urea	FALSE
570	5	A2	0.002	0.00543478	amac	urea	FALSE
575	5	A2	0.003	0.00815217	amac	urea	FALSE
580	5	A2	0.003	0.00815217	amac	urea	FALSE
585	5	A2	0.003	0.00815217	amac	urea	FALSE
590	5	A2	0.003	0.00815217	amac	urea	FALSE
595	5	A2	0.003	0.00815217	amac	urea	FALSE
600	5	A2	0.003	0.00815217	amac	urea	FALSE
605	5	A2	0.003	0.00815217	amac	urea	FALSE
610	5	A2	0.003	0.00815217	amac	urea	FALSE
615	5	A2	0.003	0.00815217	amac	urea	FALSE
620	5	A2	0.003	0.00815217	amac	urea	FALSE
625	5	A2	0.003	0.00815217	amac	urea	FALSE
630	5	A2	0.004	0.0108696	amac	urea	FALSE
635	5	A2	0.003	0.00815217	amac	urea	FALSE
640	5	A2	0.003	0.00815217	amac	urea	FALSE
645	5	A2	0.003	0.00815217	amac	urea	FALSE
650	5	A2	0.003	0.00815217	amac	urea	FALSE
655	5	A2	0.004	0.0108696	amac	urea	FALSE
660	5	A2	0.002	0.00543478	amac	urea	FALSE
665	5	A2	0.003	0.00815217	amac	urea	FALSE
670	5	A2	0.003	0.00815217	amac	urea	FALSE
675	5	A2	0.003	0.00815217	amac	urea	FALSE
680	5	A2	0.003	0.00815217	amac	urea	FALSE
685	5	A2	0.003	0.00815217	amac	urea	FALSE
690	5	A2	0.003	0.00815217	amac	urea	FALSE
695	5	A2	0.003	0.00815217	amac	urea	FALSE
700	5	A2	0.003	0.00815217	amac	urea	FALSE
300	6	A2	0.06	0.163043	amac	urea	FALSE
305	6	A2	0.046	0.125	amac	urea	FALSE
310	6	A2	0.038	0.103261	amac	urea	FALSE
315	6	A2	0.037	0.100543	amac	urea	FALSE
320	6	A2	0.036	0.0978261	amac	urea	FALSE
325	6	A2	0.037	0.100543	amac	urea	FALSE
330	6	A2	0.038	0.103261	amac	urea	FALSE
335	6	A2	0.039	0.105978	amac	urea	FALSE
340	6	A2	0.046	0.125	amac	urea	FALSE
345	6	A2	0.056	0.152174	amac	urea	FALSE
350	6	A2	0.07	0.190217	amac	urea	FALSE
355	6	A2	0.085	0.230978	amac	urea	FALSE
360	6	A2	0.103	0.279891	amac	urea	FALSE
365	6	A2	0.123	0.334239	amac	urea	FALSE
370	6	A2	0.147	0.399457	amac	urea	FALSE
375	6	A2	0.17	0.461957	amac	urea	FALSE
380	6	A2	0.185	0.502717	amac	urea	FALSE
385	6	A2	0.201	0.546196	amac	urea	FALSE
390	6	A2	0.212	0.576087	amac	urea	FALSE
395	6	A2	0.218	0.592391	amac	urea	FALSE
400	6	A2	0.214	0.581522	amac	urea	FALSE
405	6	A2	0.205	0.557065	amac	urea	FALSE
410	6	A2	0.188	0.51087	amac	urea	FALSE
415	6	A2	0.167	0.453804	amac	urea	FALSE
420	6	A2	0.142	0.38587	amac	urea	FALSE
425	6	A2	0.122	0.331522	amac	urea	FALSE
430	6	A2	0.102	0.277174	amac	urea	FALSE
435	6	A2	0.085	0.230978	amac	urea	FALSE
440	6	A2	0.078	0.211957	amac	urea	FALSE
445	6	A2	0.084	0.228261	amac	urea	FALSE
450	6	A2	0.095	0.258152	amac	urea	FALSE
455	6	A2	0.116	0.315217	amac	urea	FALSE
460	6	A2	0.144	0.391304	amac	urea	FALSE
465	6	A2	0.176	0.478261	amac	urea	FALSE
470	6	A2	0.2	0.543478	amac	urea	FALSE
475	6	A2	0.214	0.581522	amac	urea	FALSE
480	6	A2	0.235	0.638587	amac	urea	FALSE
485	6	A2	0.263	0.714674	amac	urea	FALSE
490	6	A2	0.308	0.836957	amac	urea	FALSE
495	6	A2	0.343	0.932065	amac	urea	TRUE
500	6	A2	0.338	0.918478	amac	urea	FALSE
505	6	A2	0.271	0.736413	amac	urea	FALSE
510	6	A2	0.157	0.42663	amac	urea	FALSE
515	6	A2	0.066	0.179348	amac	urea	FALSE
520	6	A2	0.027	0.0733696	amac	urea	FALSE
525	6	A2	0.011	0.0298913	amac	urea	FALSE
530	6	A2	0.005	0.013587	amac	urea	FALSE
535	6	A2	0.003	0.00815217	amac	urea	FALSE
540	6	A2	0.003	0.00815217	amac	urea	FALSE
545	6	A2	0.002	0.00543478	amac	urea	FALSE
550	6	A2	0.002	0.00543478	amac	urea	FALSE
555	6	A2	0.002	0.00543478	amac	urea	FALSE
560	6	A2	0.002	0.00543478	amac	urea	FALSE
565	6	A2	0.001	0.00271739	amac	urea	FALSE
570	6	A2	0.002	0.00543478	amac	urea	FALSE
575	6	A2	0.002	0.00543478	amac	urea	FALSE
580	6	A2	0.003	0.00815217	amac	urea	FALSE
585	6	A2	0.002	0.00543478	amac	urea	FALSE
590	6	A2	0.002	0.00543478	amac	urea	FALSE
595	6	A2	0.002	0.00543478	amac	urea	FALSE
600	6	A2	0.002	0.00543478	amac	urea	FALSE
605	6	A2	0.002	0.00543478	amac	urea	FALSE
610	6	A2	0.002	0.00543478	amac	urea	FALSE
615	6	A2	0.003	0.00815217	amac	urea	FALSE
620	6	A2	0.002	0.00543478	amac	urea	FALSE
625	6	A2	0.002	0.00543478	amac	urea	FALSE
630	6	A2	0.002	0.00543478	amac	urea	FALSE
635	6	A2	0.002	0.00543478	amac	urea	FALSE
640	6	A2	0.003	0.00815217	amac	urea	FALSE
645	6	A2	0.002	0.00543478	amac	urea	FALSE
650	6	A2	0.002	0.00543478	amac	urea	FALSE
655	6	A2	0.002	0.00543478	amac	urea	FALSE
660	6	A2	0.003	0.00815217	amac	urea	FALSE
665	6	A2	0.002	0.00543478	amac	urea	FALSE
670	6	A2	0.003	0.00815217	amac	urea	FALSE
675	6	A2	0.003	0.00815217	amac	urea	FALSE
680	6	A2	0.002	0.00543478	amac	urea	FALSE
685	6	A2	0.002	0.00543478	amac	urea	FALSE
690	6	A2	0.002	0.00543478	amac	urea	FALSE
695	6	A2	0.002	0.00543478	amac	urea	FALSE
700	6	A2	0.002	0.00543478	amac	urea	FALSE
300	7	A2	0.06	0.163043	amac	urea	FALSE
305	7	A2	0.046	0.125	amac	urea	FALSE
310	7	A2	0.039	0.105978	amac	urea	FALSE
315	7	A2	0.038	0.103261	amac	urea	FALSE
320	7	A2	0.038	0.103261	amac	urea	FALSE
325	7	A2	0.038	0.103261	amac	urea	FALSE
330	7	A2	0.038	0.103261	amac	urea	FALSE
335	7	A2	0.04	0.108696	amac	urea	FALSE
340	7	A2	0.046	0.125	amac	urea	FALSE
345	7	A2	0.057	0.154891	amac	urea	FALSE
350	7	A2	0.07	0.190217	amac	urea	FALSE
355	7	A2	0.085	0.230978	amac	urea	FALSE
360	7	A2	0.103	0.279891	amac	urea	FALSE
365	7	A2	0.123	0.334239	amac	urea	FALSE
370	7	A2	0.148	0.402174	amac	urea	FALSE
375	7	A2	0.17	0.461957	amac	urea	FALSE
380	7	A2	0.185	0.502717	amac	urea	FALSE
385	7	A2	0.2	0.543478	amac	urea	FALSE
390	7	A2	0.212	0.576087	amac	urea	FALSE
395	7	A2	0.218	0.592391	amac	urea	FALSE
400	7	A2	0.214	0.581522	amac	urea	FALSE
405	7	A2	0.204	0.554348	amac	urea	FALSE
410	7	A2	0.188	0.51087	amac	urea	FALSE
415	7	A2	0.166	0.451087	amac	urea	FALSE
420	7	A2	0.142	0.38587	amac	urea	FALSE
425	7	A2	0.122	0.331522	amac	urea	FALSE
430	7	A2	0.1	0.271739	amac	urea	FALSE
435	7	A2	0.084	0.228261	amac	urea	FALSE
440	7	A2	0.079	0.214674	amac	urea	FALSE
445	7	A2	0.083	0.225543	amac	urea	FALSE
450	7	A2	0.094	0.255435	amac	urea	FALSE
455	7	A2	0.115	0.3125	amac	urea	FALSE
460	7	A2	0.143	0.388587	amac	urea	FALSE
465	7	A2	0.173	0.470109	amac	urea	FALSE
470	7	A2	0.197	0.535326	amac	urea	FALSE
475	7	A2	0.211	0.57337	amac	urea	FALSE
480	7	A2	0.231	0.627717	amac	urea	FALSE
485	7	A2	0.26	0.706522	amac	urea	FALSE
490	7	A2	0.304	0.826087	amac	urea	FALSE
495	7	A2	0.338	0.918478	amac	urea	TRUE
500	7	A2	0.334	0.907609	amac	urea	FALSE
505	7	A2	0.268	0.728261	amac	urea	FALSE
510	7	A2	0.155	0.421196	amac	urea	FALSE
515	7	A2	0.066	0.179348	amac	urea	FALSE
520	7	A2	0.027	0.0733696	amac	urea	FALSE
525	7	A2	0.01	0.0271739	amac	urea	FALSE
530	7	A2	0.006	0.0163043	amac	urea	FALSE
535	7	A2	0.003	0.00815217	amac	urea	FALSE
540	7	A2	0.003	0.00815217	amac	urea	FALSE
545	7	A2	0.003	0.00815217	amac	urea	FALSE
550	7	A2	0.002	0.00543478	amac	urea	FALSE
555	7	A2	0.002	0.00543478	amac	urea	FALSE
560	7	A2	0.002	0.00543478	amac	urea	FALSE
565	7	A2	0.003	0.00815217	amac	urea	FALSE
570	7	A2	0.003	0.00815217	amac	urea	FALSE
575	7	A2	0.003	0.00815217	amac	urea	FALSE
580	7	A2	0.003	0.00815217	amac	urea	FALSE
585	7	A2	0.002	0.00543478	amac	urea	FALSE
590	7	A2	0.002	0.00543478	amac	urea	FALSE
595	7	A2	0.002	0.00543478	amac	urea	FALSE
600	7	A2	0.002	0.00543478	amac	urea	FALSE
605	7	A2	0.002	0.00543478	amac	urea	FALSE
610	7	A2	0.003	0.00815217	amac	urea	FALSE
615	7	A2	0.003	0.00815217	amac	urea	FALSE
620	7	A2	0.002	0.00543478	amac	urea	FALSE
625	7	A2	0.002	0.00543478	amac	urea	FALSE
630	7	A2	0.003	0.00815217	amac	urea	FALSE
635	7	A2	0.002	0.00543478	amac	urea	FALSE
640	7	A2	0.003	0.00815217	amac	urea	FALSE
645	7	A2	0.003	0.00815217	amac	urea	FALSE
650	7	A2	0.002	0.00543478	amac	urea	FALSE
655	7	A2	0.002	0.00543478	amac	urea	FALSE
660	7	A2	0.002	0.00543478	amac	urea	FALSE
665	7	A2	0.003	0.00815217	amac	urea	FALSE
670	7	A2	0.003	0.00815217	amac	urea	FALSE
675	7	A2	0.002	0.00543478	amac	urea	FALSE
680	7	A2	0.002	0.00543478	amac	urea	FALSE
685	7	A2	0.002	0.00543478	amac	urea	FALSE
690	7	A2	0.002	0.00543478	amac	urea	FALSE
695	7	A2	0.001	0.00271739	amac	urea	FALSE
700	7	A2	0.003	0.00815217	amac	urea	FALSE
300	8	A2	0.061	0.165761	amac	urea	FALSE
305	8	A2	0.044	0.119565	amac	urea	FALSE
310	8	A2	0.039	0.105978	amac	urea	FALSE
315	8	A2	0.038	0.103261	amac	urea	FALSE
320	8	A2	0.038	0.103261	amac	urea	FALSE
325	8	A2	0.038	0.103261	amac	urea	FALSE
330	8	A2	0.038	0.103261	amac	urea	FALSE
335	8	A2	0.041	0.111413	amac	urea	FALSE
340	8	A2	0.046	0.125	amac	urea	FALSE
345	8	A2	0.057	0.154891	amac	urea	FALSE
350	8	A2	0.071	0.192935	amac	urea	FALSE
355	8	A2	0.086	0.233696	amac	urea	FALSE
360	8	A2	0.103	0.279891	amac	urea	FALSE
365	8	A2	0.124	0.336957	amac	urea	FALSE
370	8	A2	0.148	0.402174	amac	urea	FALSE
375	8	A2	0.17	0.461957	amac	urea	FALSE
380	8	A2	0.186	0.505435	amac	urea	FALSE
385	8	A2	0.2	0.543478	amac	urea	FALSE
390	8	A2	0.213	0.578804	amac	urea	FALSE
395	8	A2	0.218	0.592391	amac	urea	FALSE
400	8	A2	0.214	0.581522	amac	urea	FALSE
405	8	A2	0.203	0.55163	amac	urea	FALSE
410	8	A2	0.188	0.51087	amac	urea	FALSE
415	8	A2	0.165	0.44837	amac	urea	FALSE
420	8	A2	0.142	0.38587	amac	urea	FALSE
425	8	A2	0.12	0.326087	amac	urea	FALSE
430	8	A2	0.1	0.271739	amac	urea	FALSE
435	8	A2	0.084	0.228261	amac	urea	FALSE
440	8	A2	0.078	0.211957	amac	urea	FALSE
445	8	A2	0.083	0.225543	amac	urea	FALSE
450	8	A2	0.093	0.252717	amac	urea	FALSE
455	8	A2	0.114	0.309783	amac	urea	FALSE
460	8	A2	0.141	0.383152	amac	urea	FALSE
465	8	A2	0.172	0.467391	amac	urea	FALSE
470	8	A2	0.196	0.532609	amac	urea	FALSE
475	8	A2	0.209	0.567935	amac	urea	FALSE
480	8	A2	0.229	0.622283	amac	urea	FALSE
485	8	A2	0.257	0.69837	amac	urea	FALSE
490	8	A2	0.3	0.815217	amac	urea	FALSE
495	8	A2	0.334	0.907609	amac	urea	TRUE
500	8	A2	0.329	0.894022	amac	urea	FALSE
505	8	A2	0.263	0.714674	amac	urea	FALSE
510	8	A2	0.152	0.413043	amac	urea	FALSE
515	8	A2	0.065	0.17663	amac	urea	FALSE
520	8	A2	0.027	0.0733696	amac	urea	FALSE
525	8	A2	0.009	0.0244565	amac	urea	FALSE
530	8	A2	0.005	0.013587	amac	urea	FALSE
535	8	A2	0.003	0.00815217	amac	urea	FALSE
540	8	A2	0.002	0.00543478	amac	urea	FALSE
545	8	A2	0.003	0.00815217	amac	urea	FALSE
550	8	A2	0.002	0.00543478	amac	urea	FALSE
555	8	A2	0.002	0.00543478	amac	urea	FALSE
560	8	A2	0.002	0.00543478	amac	urea	FALSE
565	8	A2	0.002	0.00543478	amac	urea	FALSE
570	8	A2	0.003	0.00815217	amac	urea	FALSE
575	8	A2	0.002	0.00543478	amac	urea	FALSE
580	8	A2	0.002	0.00543478	amac	urea	FALSE
585	8	A2	0.002	0.00543478	amac	urea	FALSE
590	8	A2	0.002	0.00543478	amac	urea	FALSE
595	8	A2	0.002	0.00543478	amac	urea	FALSE
600	8	A2	0.002	0.00543478	amac	urea	FALSE
605	8	A2	0.002	0.00543478	amac	urea	FALSE
610	8	A2	0.003	0.00815217	amac	urea	FALSE
615	8	A2	0.002	0.00543478	amac	urea	FALSE
620	8	A2	0.002	0.00543478	amac	urea	FALSE
625	8	A2	0.002	0.00543478	amac	urea	FALSE
630	8	A2	0.002	0.00543478	amac	urea	FALSE
635	8	A2	0.002	0.00543478	amac	urea	FALSE
640	8	A2	0.002	0.00543478	amac	urea	FALSE
645	8	A2	0.003	0.00815217	amac	urea	FALSE
650	8	A2	0.003	0.00815217	amac	urea	FALSE
655	8	A2	0.002	0.00543478	amac	urea	FALSE
660	8	A2	0.002	0.00543478	amac	urea	FALSE
665	8	A2	0.002	0.00543478	amac	urea	FALSE
670	8	A2	0.003	0.00815217	amac	urea	FALSE
675	8	A2	0.002	0.00543478	amac	urea	FALSE
680	8	A2	0.002	0.00543478	amac	urea	FALSE
685	8	A2	0.003	0.00815217	amac	urea	FALSE
690	8	A2	0.002	0.00543478	amac	urea	FALSE
695	8	A2	0.002	0.00543478	amac	urea	FALSE
700	8	A2	0.002	0.00543478	amac	urea	FALSE
300	9	A2	0.062	0.168478	amac	urea	FALSE
305	9	A2	0.045	0.122283	amac	urea	FALSE
310	9	A2	0.039	0.105978	amac	urea	FALSE
315	9	A2	0.038	0.103261	amac	urea	FALSE
320	9	A2	0.038	0.103261	amac	urea	FALSE
325	9	A2	0.038	0.103261	amac	urea	FALSE
330	9	A2	0.04	0.108696	amac	urea	FALSE
335	9	A2	0.041	0.111413	amac	urea	FALSE
340	9	A2	0.047	0.127717	amac	urea	FALSE
345	9	A2	0.057	0.154891	amac	urea	FALSE
350	9	A2	0.07	0.190217	amac	urea	FALSE
355	9	A2	0.086	0.233696	amac	urea	FALSE
360	9	A2	0.103	0.279891	amac	urea	FALSE
365	9	A2	0.124	0.336957	amac	urea	FALSE
370	9	A2	0.149	0.404891	amac	urea	FALSE
375	9	A2	0.17	0.461957	amac	urea	FALSE
380	9	A2	0.186	0.505435	amac	urea	FALSE
385	9	A2	0.201	0.546196	amac	urea	FALSE
390	9	A2	0.213	0.578804	amac	urea	FALSE
395	9	A2	0.218	0.592391	amac	urea	FALSE
400	9	A2	0.213	0.578804	amac	urea	FALSE
405	9	A2	0.204	0.554348	amac	urea	FALSE
410	9	A2	0.187	0.508152	amac	urea	FALSE
415	9	A2	0.165	0.44837	amac	urea	FALSE
420	9	A2	0.14	0.380435	amac	urea	FALSE
425	9	A2	0.12	0.326087	amac	urea	FALSE
430	9	A2	0.1	0.271739	amac	urea	FALSE
435	9	A2	0.084	0.228261	amac	urea	FALSE
440	9	A2	0.077	0.209239	amac	urea	FALSE
445	9	A2	0.082	0.222826	amac	urea	FALSE
450	9	A2	0.093	0.252717	amac	urea	FALSE
455	9	A2	0.112	0.304348	amac	urea	FALSE
460	9	A2	0.139	0.377717	amac	urea	FALSE
465	9	A2	0.169	0.459239	amac	urea	FALSE
470	9	A2	0.193	0.524457	amac	urea	FALSE
475	9	A2	0.207	0.5625	amac	urea	FALSE
480	9	A2	0.225	0.611413	amac	urea	FALSE
485	9	A2	0.253	0.6875	amac	urea	FALSE
490	9	A2	0.296	0.804348	amac	urea	FALSE
495	9	A2	0.329	0.894022	amac	urea	TRUE
500	9	A2	0.324	0.880435	amac	urea	FALSE
505	9	A2	0.259	0.703804	amac	urea	FALSE
510	9	A2	0.15	0.407609	amac	urea	FALSE
515	9	A2	0.065	0.17663	amac	urea	FALSE
520	9	A2	0.027	0.0733696	amac	urea	FALSE
525	9	A2	0.01	0.0271739	amac	urea	FALSE
530	9	A2	0.005	0.013587	amac	urea	FALSE
535	9	A2	0.003	0.00815217	amac	urea	FALSE
540	9	A2	0.003	0.00815217	amac	urea	FALSE
545	9	A2	0.002	0.00543478	amac	urea	FALSE
550	9	A2	0.002	0.00543478	amac	urea	FALSE
555	9	A2	0.002	0.00543478	amac	urea	FALSE
560	9	A2	0.002	0.00543478	amac	urea	FALSE
565	9	A2	0.002	0.00543478	amac	urea	FALSE
570	9	A2	0.003	0.00815217	amac	urea	FALSE
575	9	A2	0.002	0.00543478	amac	urea	FALSE
580	9	A2	0.002	0.00543478	amac	urea	FALSE
585	9	A2	0.002	0.00543478	amac	urea	FALSE
590	9	A2	0.002	0.00543478	amac	urea	FALSE
595	9	A2	0.002	0.00543478	amac	urea	FALSE
600	9	A2	0.002	0.00543478	amac	urea	FALSE
605	9	A2	0.002	0.00543478	amac	urea	FALSE
610	9	A2	0.003	0.00815217	amac	urea	FALSE
615	9	A2	0.003	0.00815217	amac	urea	FALSE
620	9	A2	0.002	0.00543478	amac	urea	FALSE
625	9	A2	0.002	0.00543478	amac	urea	FALSE
630	9	A2	0.003	0.00815217	amac	urea	FALSE
635	9	A2	0.003	0.00815217	amac	urea	FALSE
640	9	A2	0.003	0.00815217	amac	urea	FALSE
645	9	A2	0.003	0.00815217	amac	urea	FALSE
650	9	A2	0.002	0.00543478	amac	urea	FALSE
655	9	A2	0.002	0.00543478	amac	urea	FALSE
660	9	A2	0.002	0.00543478	amac	urea	FALSE
665	9	A2	0.002	0.00543478	amac	urea	FALSE
670	9	A2	0.002	0.00543478	amac	urea	FALSE
675	9	A2	0.003	0.00815217	amac	urea	FALSE
680	9	A2	0.002	0.00543478	amac	urea	FALSE
685	9	A2	0.003	0.00815217	amac	urea	FALSE
690	9	A2	0.003	0.00815217	amac	urea	FALSE
695	9	A2	0.003	0.00815217	amac	urea	FALSE
700	9	A2	0.002	0.00543478	amac	urea	FALSE
300	10	A2	0.064	0.173913	amac	urea	FALSE
305	10	A2	0.049	0.133152	amac	urea	FALSE
310	10	A2	0.04	0.108696	amac	urea	FALSE
315	10	A2	0.039	0.105978	amac	urea	FALSE
320	10	A2	0.038	0.103261	amac	urea	FALSE
325	10	A2	0.039	0.105978	amac	urea	FALSE
330	10	A2	0.039	0.105978	amac	urea	FALSE
335	10	A2	0.041	0.111413	amac	urea	FALSE
340	10	A2	0.047	0.127717	amac	urea	FALSE
345	10	A2	0.057	0.154891	amac	urea	FALSE
350	10	A2	0.072	0.195652	amac	urea	FALSE
355	10	A2	0.087	0.236413	amac	urea	FALSE
360	10	A2	0.104	0.282609	amac	urea	FALSE
365	10	A2	0.124	0.336957	amac	urea	FALSE
370	10	A2	0.149	0.404891	amac	urea	FALSE
375	10	A2	0.171	0.464674	amac	urea	FALSE
380	10	A2	0.186	0.505435	amac	urea	FALSE
385	10	A2	0.201	0.546196	amac	urea	FALSE
390	10	A2	0.213	0.578804	amac	urea	FALSE
395	10	A2	0.217	0.589674	amac	urea	FALSE
400	10	A2	0.213	0.578804	amac	urea	FALSE
405	10	A2	0.202	0.548913	amac	urea	FALSE
410	10	A2	0.186	0.505435	amac	urea	FALSE
415	10	A2	0.164	0.445652	amac	urea	FALSE
420	10	A2	0.14	0.380435	amac	urea	FALSE
425	10	A2	0.119	0.32337	amac	urea	FALSE
430	10	A2	0.1	0.271739	amac	urea	FALSE
435	10	A2	0.084	0.228261	amac	urea	FALSE
440	10	A2	0.078	0.211957	amac	urea	FALSE
445	10	A2	0.082	0.222826	amac	urea	FALSE
450	10	A2	0.092	0.25	amac	urea	FALSE
455	10	A2	0.112	0.304348	amac	urea	FALSE
460	10	A2	0.138	0.375	amac	urea	FALSE
465	10	A2	0.168	0.456522	amac	urea	FALSE
470	10	A2	0.19	0.516304	amac	urea	FALSE
475	10	A2	0.204	0.554348	amac	urea	FALSE
480	10	A2	0.223	0.605978	amac	urea	FALSE
485	10	A2	0.25	0.679348	amac	urea	FALSE
490	10	A2	0.293	0.796196	amac	urea	FALSE
495	10	A2	0.324	0.880435	amac	urea	TRUE
500	10	A2	0.319	0.866848	amac	urea	FALSE
505	10	A2	0.254	0.690217	amac	urea	FALSE
510	10	A2	0.148	0.402174	amac	urea	FALSE
515	10	A2	0.063	0.171196	amac	urea	FALSE
520	10	A2	0.026	0.0706522	amac	urea	FALSE
525	10	A2	0.011	0.0298913	amac	urea	FALSE
530	10	A2	0.005	0.013587	amac	urea	FALSE
535	10	A2	0.003	0.00815217	amac	urea	FALSE
540	10	A2	0.002	0.00543478	amac	urea	FALSE
545	10	A2	0.002	0.00543478	amac	urea	FALSE
550	10	A2	0.002	0.00543478	amac	urea	FALSE
555	10	A2	0.002	0.00543478	amac	urea	FALSE
560	10	A2	0.002	0.00543478	amac	urea	FALSE
565	10	A2	0.002	0.00543478	amac	urea	FALSE
570	10	A2	0.002	0.00543478	amac	urea	FALSE
575	10	A2	0.003	0.00815217	amac	urea	FALSE
580	10	A2	0.002	0.00543478	amac	urea	FALSE
585	10	A2	0.002	0.00543478	amac	urea	FALSE
590	10	A2	0.002	0.00543478	amac	urea	FALSE
595	10	A2	0.002	0.00543478	amac	urea	FALSE
600	10	A2	0.002	0.00543478	amac	urea	FALSE
605	10	A2	0.002	0.00543478	amac	urea	FALSE
610	10	A2	0.003	0.00815217	amac	urea	FALSE
615	10	A2	0.003	0.00815217	amac	urea	FALSE
620	10	A2	0.002	0.00543478	amac	urea	FALSE
625	10	A2	0.002	0.00543478	amac	urea	FALSE
630	10	A2	0.002	0.00543478	amac	urea	FALSE
635	10	A2	0.002	0.00543478	amac	urea	FALSE
640	10	A2	0.003	0.00815217	amac	urea	FALSE
645	10	A2	0.003	0.00815217	amac	urea	FALSE
650	10	A2	0.003	0.00815217	amac	urea	FALSE
655	10	A2	0.002	0.00543478	amac	urea	FALSE
660	10	A2	0.002	0.00543478	amac	urea	FALSE
665	10	A2	0.002	0.00543478	amac	urea	FALSE
670	10	A2	0.002	0.00543478	amac	urea	FALSE
675	10	A2	0.003	0.00815217	amac	urea	FALSE
680	10	A2	0.003	0.00815217	amac	urea	FALSE
685	10	A2	0.003	0.00815217	amac	urea	FALSE
690	10	A2	0.002	0.00543478	amac	urea	FALSE
695	10	A2	0.002	0.00543478	amac	urea	FALSE
700	10	A2	0.003	0.00815217	amac	urea	FALSE
300	11	A2	0.062	0.168478	amac	urea	FALSE
305	11	A2	0.046	0.125	amac	urea	FALSE
310	11	A2	0.041	0.111413	amac	urea	FALSE
315	11	A2	0.039	0.105978	amac	urea	FALSE
320	11	A2	0.04	0.108696	amac	urea	FALSE
325	11	A2	0.039	0.105978	amac	urea	FALSE
330	11	A2	0.04	0.108696	amac	urea	FALSE
335	11	A2	0.041	0.111413	amac	urea	FALSE
340	11	A2	0.047	0.127717	amac	urea	FALSE
345	11	A2	0.058	0.157609	amac	urea	FALSE
350	11	A2	0.072	0.195652	amac	urea	FALSE
355	11	A2	0.088	0.23913	amac	urea	FALSE
360	11	A2	0.104	0.282609	amac	urea	FALSE
365	11	A2	0.125	0.339674	amac	urea	FALSE
370	11	A2	0.15	0.407609	amac	urea	FALSE
375	11	A2	0.171	0.464674	amac	urea	FALSE
380	11	A2	0.187	0.508152	amac	urea	FALSE
385	11	A2	0.2	0.543478	amac	urea	FALSE
390	11	A2	0.212	0.576087	amac	urea	FALSE
395	11	A2	0.218	0.592391	amac	urea	FALSE
400	11	A2	0.213	0.578804	amac	urea	FALSE
405	11	A2	0.202	0.548913	amac	urea	FALSE
410	11	A2	0.185	0.502717	amac	urea	FALSE
415	11	A2	0.164	0.445652	amac	urea	FALSE
420	11	A2	0.139	0.377717	amac	urea	FALSE
425	11	A2	0.119	0.32337	amac	urea	FALSE
430	11	A2	0.099	0.269022	amac	urea	FALSE
435	11	A2	0.083	0.225543	amac	urea	FALSE
440	11	A2	0.077	0.209239	amac	urea	FALSE
445	11	A2	0.081	0.220109	amac	urea	FALSE
450	11	A2	0.091	0.247283	amac	urea	FALSE
455	11	A2	0.111	0.30163	amac	urea	FALSE
460	11	A2	0.137	0.372283	amac	urea	FALSE
465	11	A2	0.166	0.451087	amac	urea	FALSE
470	11	A2	0.189	0.513587	amac	urea	FALSE
475	11	A2	0.201	0.546196	amac	urea	FALSE
480	11	A2	0.22	0.597826	amac	urea	FALSE
485	11	A2	0.247	0.671196	amac	urea	FALSE
490	11	A2	0.286	0.777174	amac	urea	FALSE
495	11	A2	0.318	0.86413	amac	urea	TRUE
500	11	A2	0.314	0.853261	amac	urea	FALSE
505	11	A2	0.251	0.682065	amac	urea	FALSE
510	11	A2	0.144	0.391304	amac	urea	FALSE
515	11	A2	0.062	0.168478	amac	urea	FALSE
520	11	A2	0.026	0.0706522	amac	urea	FALSE
525	11	A2	0.009	0.0244565	amac	urea	FALSE
530	11	A2	0.004	0.0108696	amac	urea	FALSE
535	11	A2	0.003	0.00815217	amac	urea	FALSE
540	11	A2	0.002	0.00543478	amac	urea	FALSE
545	11	A2	0.002	0.00543478	amac	urea	FALSE
550	11	A2	0.002	0.00543478	amac	urea	FALSE
555	11	A2	0.002	0.00543478	amac	urea	FALSE
560	11	A2	0.002	0.00543478	amac	urea	FALSE
565	11	A2	0.002	0.00543478	amac	urea	FALSE
570	11	A2	0.003	0.00815217	amac	urea	FALSE
575	11	A2	0.002	0.00543478	amac	urea	FALSE
580	11	A2	0.003	0.00815217	amac	urea	FALSE
585	11	A2	0.002	0.00543478	amac	urea	FALSE
590	11	A2	0.002	0.00543478	amac	urea	FALSE
595	11	A2	0.002	0.00543478	amac	urea	FALSE
600	11	A2	0.002	0.00543478	amac	urea	FALSE
605	11	A2	0.002	0.00543478	amac	urea	FALSE
610	11	A2	0.003	0.00815217	amac	urea	FALSE
615	11	A2	0.003	0.00815217	amac	urea	FALSE
620	11	A2	0.003	0.00815217	amac	urea	FALSE
625	11	A2	0.002	0.00543478	amac	urea	FALSE
630	11	A2	0.002	0.00543478	amac	urea	FALSE
635	11	A2	0.002	0.00543478	amac	urea	FALSE
640	11	A2	0.003	0.00815217	amac	urea	FALSE
645	11	A2	0.003	0.00815217	amac	urea	FALSE
650	11	A2	0.003	0.00815217	amac	urea	FALSE
655	11	A2	0.002	0.00543478	amac	urea	FALSE
660	11	A2	0.002	0.00543478	amac	urea	FALSE
665	11	A2	0.003	0.00815217	amac	urea	FALSE
670	11	A2	0.003	0.00815217	amac	urea	FALSE
675	11	A2	0.002	0.00543478	amac	urea	FALSE
680	11	A2	0.002	0.00543478	amac	urea	FALSE
685	11	A2	0.003	0.00815217	amac	urea	FALSE
690	11	A2	0.002	0.00543478	amac	urea	FALSE
695	11	A2	0.001	0.00271739	amac	urea	FALSE
700	11	A2	0.002	0.00543478	amac	urea	FALSE
300	12	A2	0.061	0.165761	amac	urea	FALSE
305	12	A2	0.046	0.125	amac	urea	FALSE
310	12	A2	0.041	0.111413	amac	urea	FALSE
315	12	A2	0.04	0.108696	amac	urea	FALSE
320	12	A2	0.039	0.105978	amac	urea	FALSE
325	12	A2	0.04	0.108696	amac	urea	FALSE
330	12	A2	0.04	0.108696	amac	urea	FALSE
335	12	A2	0.042	0.11413	amac	urea	FALSE
340	12	A2	0.047	0.127717	amac	urea	FALSE
345	12	A2	0.058	0.157609	amac	urea	FALSE
350	12	A2	0.073	0.19837	amac	urea	FALSE
355	12	A2	0.088	0.23913	amac	urea	FALSE
360	12	A2	0.105	0.285326	amac	urea	FALSE
365	12	A2	0.126	0.342391	amac	urea	FALSE
370	12	A2	0.15	0.407609	amac	urea	FALSE
375	12	A2	0.171	0.464674	amac	urea	FALSE
380	12	A2	0.187	0.508152	amac	urea	FALSE
385	12	A2	0.201	0.546196	amac	urea	FALSE
390	12	A2	0.211	0.57337	amac	urea	FALSE
395	12	A2	0.217	0.589674	amac	urea	FALSE
400	12	A2	0.212	0.576087	amac	urea	FALSE
405	12	A2	0.201	0.546196	amac	urea	FALSE
410	12	A2	0.186	0.505435	amac	urea	FALSE
415	12	A2	0.163	0.442935	amac	urea	FALSE
420	12	A2	0.139	0.377717	amac	urea	FALSE
425	12	A2	0.118	0.320652	amac	urea	FALSE
430	12	A2	0.098	0.266304	amac	urea	FALSE
435	12	A2	0.083	0.225543	amac	urea	FALSE
440	12	A2	0.076	0.206522	amac	urea	FALSE
445	12	A2	0.081	0.220109	amac	urea	FALSE
450	12	A2	0.091	0.247283	amac	urea	FALSE
455	12	A2	0.109	0.296196	amac	urea	FALSE
460	12	A2	0.135	0.366848	amac	urea	FALSE
465	12	A2	0.163	0.442935	amac	urea	FALSE
470	12	A2	0.185	0.502717	amac	urea	FALSE
475	12	A2	0.199	0.540761	amac	urea	FALSE
480	12	A2	0.217	0.589674	amac	urea	FALSE
485	12	A2	0.243	0.660326	amac	urea	FALSE
490	12	A2	0.283	0.769022	amac	urea	FALSE
495	12	A2	0.314	0.853261	amac	urea	TRUE
500	12	A2	0.309	0.839674	amac	urea	FALSE
505	12	A2	0.248	0.673913	amac	urea	FALSE
510	12	A2	0.142	0.38587	amac	urea	FALSE
515	12	A2	0.061	0.165761	amac	urea	FALSE
520	12	A2	0.026	0.0706522	amac	urea	FALSE
525	12	A2	0.009	0.0244565	amac	urea	FALSE
530	12	A2	0.005	0.013587	amac	urea	FALSE
535	12	A2	0.003	0.00815217	amac	urea	FALSE
540	12	A2	0.003	0.00815217	amac	urea	FALSE
545	12	A2	0.002	0.00543478	amac	urea	FALSE
550	12	A2	0.002	0.00543478	amac	urea	FALSE
555	12	A2	0.002	0.00543478	amac	urea	FALSE
560	12	A2	0.002	0.00543478	amac	urea	FALSE
565	12	A2	0.003	0.00815217	amac	urea	FALSE
570	12	A2	0.002	0.00543478	amac	urea	FALSE
575	12	A2	0.002	0.00543478	amac	urea	FALSE
580	12	A2	0.003	0.00815217	amac	urea	FALSE
585	12	A2	0.002	0.00543478	amac	urea	FALSE
590	12	A2	0.002	0.00543478	amac	urea	FALSE
595	12	A2	0.002	0.00543478	amac	urea	FALSE
600	12	A2	0.002	0.00543478	amac	urea	FALSE
605	12	A2	0.002	0.00543478	amac	urea	FALSE
610	12	A2	0.003	0.00815217	amac	urea	FALSE
615	12	A2	0.003	0.00815217	amac	urea	FALSE
620	12	A2	0.002	0.00543478	amac	urea	FALSE
625	12	A2	0.002	0.00543478	amac	urea	FALSE
630	12	A2	0.002	0.00543478	amac	urea	FALSE
635	12	A2	0.003	0.00815217	amac	urea	FALSE
640	12	A2	0.003	0.00815217	amac	urea	FALSE
645	12	A2	0.003	0.00815217	amac	urea	FALSE
650	12	A2	0.003	0.00815217	amac	urea	FALSE
655	12	A2	0.003	0.00815217	amac	urea	FALSE
660	12	A2	0.002	0.00543478	amac	urea	FALSE
665	12	A2	0.002	0.00543478	amac	urea	FALSE
670	12	A2	0.003	0.00815217	amac	urea	FALSE
675	12	A2	0.002	0.00543478	amac	urea	FALSE
680	12	A2	0.002	0.00543478	amac	urea	FALSE
685	12	A2	0.002	0.00543478	amac	urea	FALSE
690	12	A2	0.002	0.00543478	amac	urea	FALSE
695	12	A2	0.002	0.00543478	amac	urea	FALSE
700	12	A2	0.002	0.00543478	amac	urea	FALSE
300	13	A2	0.06	0.163043	amac	urea	FALSE
305	13	A2	0.049	0.133152	amac	urea	FALSE
310	13	A2	0.042	0.11413	amac	urea	FALSE
315	13	A2	0.04	0.108696	amac	urea	FALSE
320	13	A2	0.04	0.108696	amac	urea	FALSE
325	13	A2	0.04	0.108696	amac	urea	FALSE
330	13	A2	0.04	0.108696	amac	urea	FALSE
335	13	A2	0.042	0.11413	amac	urea	FALSE
340	13	A2	0.047	0.127717	amac	urea	FALSE
345	13	A2	0.058	0.157609	amac	urea	FALSE
350	13	A2	0.072	0.195652	amac	urea	FALSE
355	13	A2	0.088	0.23913	amac	urea	FALSE
360	13	A2	0.105	0.285326	amac	urea	FALSE
365	13	A2	0.125	0.339674	amac	urea	FALSE
370	13	A2	0.15	0.407609	amac	urea	FALSE
375	13	A2	0.171	0.464674	amac	urea	FALSE
380	13	A2	0.187	0.508152	amac	urea	FALSE
385	13	A2	0.201	0.546196	amac	urea	FALSE
390	13	A2	0.211	0.57337	amac	urea	FALSE
395	13	A2	0.217	0.589674	amac	urea	FALSE
400	13	A2	0.212	0.576087	amac	urea	FALSE
405	13	A2	0.201	0.546196	amac	urea	FALSE
410	13	A2	0.185	0.502717	amac	urea	FALSE
415	13	A2	0.162	0.440217	amac	urea	FALSE
420	13	A2	0.138	0.375	amac	urea	FALSE
425	13	A2	0.118	0.320652	amac	urea	FALSE
430	13	A2	0.097	0.263587	amac	urea	FALSE
435	13	A2	0.082	0.222826	amac	urea	FALSE
440	13	A2	0.076	0.206522	amac	urea	FALSE
445	13	A2	0.08	0.217391	amac	urea	FALSE
450	13	A2	0.09	0.244565	amac	urea	FALSE
455	13	A2	0.108	0.293478	amac	urea	FALSE
460	13	A2	0.134	0.36413	amac	urea	FALSE
465	13	A2	0.161	0.4375	amac	urea	FALSE
470	13	A2	0.184	0.5	amac	urea	FALSE
475	13	A2	0.196	0.532609	amac	urea	FALSE
480	13	A2	0.213	0.578804	amac	urea	FALSE
485	13	A2	0.24	0.652174	amac	urea	FALSE
490	13	A2	0.278	0.755435	amac	urea	FALSE
495	13	A2	0.309	0.839674	amac	urea	TRUE
500	13	A2	0.304	0.826087	amac	urea	FALSE
505	13	A2	0.244	0.663043	amac	urea	FALSE
510	13	A2	0.142	0.38587	amac	urea	FALSE
515	13	A2	0.061	0.165761	amac	urea	FALSE
520	13	A2	0.026	0.0706522	amac	urea	FALSE
525	13	A2	0.009	0.0244565	amac	urea	FALSE
530	13	A2	0.005	0.013587	amac	urea	FALSE
535	13	A2	0.004	0.0108696	amac	urea	FALSE
540	13	A2	0.002	0.00543478	amac	urea	FALSE
545	13	A2	0.003	0.00815217	amac	urea	FALSE
550	13	A2	0.002	0.00543478	amac	urea	FALSE
555	13	A2	0.002	0.00543478	amac	urea	FALSE
560	13	A2	0.002	0.00543478	amac	urea	FALSE
565	13	A2	0.002	0.00543478	amac	urea	FALSE
570	13	A2	0.002	0.00543478	amac	urea	FALSE
575	13	A2	0.002	0.00543478	amac	urea	FALSE
580	13	A2	0.002	0.00543478	amac	urea	FALSE
585	13	A2	0.002	0.00543478	amac	urea	FALSE
590	13	A2	0.002	0.00543478	amac	urea	FALSE
595	13	A2	0.002	0.00543478	amac	urea	FALSE
600	13	A2	0.002	0.00543478	amac	urea	FALSE
605	13	A2	0.002	0.00543478	amac	urea	FALSE
610	13	A2	0.002	0.00543478	amac	urea	FALSE
615	13	A2	0.003	0.00815217	amac	urea	FALSE
620	13	A2	0.002	0.00543478	amac	urea	FALSE
625	13	A2	0.002	0.00543478	amac	urea	FALSE
630	13	A2	0.002	0.00543478	amac	urea	FALSE
635	13	A2	0.002	0.00543478	amac	urea	FALSE
640	13	A2	0.002	0.00543478	amac	urea	FALSE
645	13	A2	0.003	0.00815217	amac	urea	FALSE
650	13	A2	0.002	0.00543478	amac	urea	FALSE
655	13	A2	0.002	0.00543478	amac	urea	FALSE
660	13	A2	0.002	0.00543478	amac	urea	FALSE
665	13	A2	0.002	0.00543478	amac	urea	FALSE
670	13	A2	0.002	0.00543478	amac	urea	FALSE
675	13	A2	0.003	0.00815217	amac	urea	FALSE
680	13	A2	0.003	0.00815217	amac	urea	FALSE
685	13	A2	0.002	0.00543478	amac	urea	FALSE
690	13	A2	0.001	0.00271739	amac	urea	FALSE
695	13	A2	0.001	0.00271739	amac	urea	FALSE
700	13	A2	0.002	0.00543478	amac	urea	FALSE
300	14	A2	0.063	0.171196	amac	urea	FALSE
305	14	A2	0.049	0.133152	amac	urea	FALSE
310	14	A2	0.042	0.11413	amac	urea	FALSE
315	14	A2	0.041	0.111413	amac	urea	FALSE
320	14	A2	0.04	0.108696	amac	urea	FALSE
325	14	A2	0.041	0.111413	amac	urea	FALSE
330	14	A2	0.041	0.111413	amac	urea	FALSE
335	14	A2	0.043	0.116848	amac	urea	FALSE
340	14	A2	0.048	0.130435	amac	urea	FALSE
345	14	A2	0.059	0.160326	amac	urea	FALSE
350	14	A2	0.072	0.195652	amac	urea	FALSE
355	14	A2	0.089	0.241848	amac	urea	FALSE
360	14	A2	0.105	0.285326	amac	urea	FALSE
365	14	A2	0.126	0.342391	amac	urea	FALSE
370	14	A2	0.151	0.410326	amac	urea	FALSE
375	14	A2	0.172	0.467391	amac	urea	FALSE
380	14	A2	0.187	0.508152	amac	urea	FALSE
385	14	A2	0.201	0.546196	amac	urea	FALSE
390	14	A2	0.212	0.576087	amac	urea	FALSE
395	14	A2	0.216	0.586957	amac	urea	FALSE
400	14	A2	0.212	0.576087	amac	urea	FALSE
405	14	A2	0.2	0.543478	amac	urea	FALSE
410	14	A2	0.184	0.5	amac	urea	FALSE
415	14	A2	0.162	0.440217	amac	urea	FALSE
420	14	A2	0.137	0.372283	amac	urea	FALSE
425	14	A2	0.117	0.317935	amac	urea	FALSE
430	14	A2	0.097	0.263587	amac	urea	FALSE
435	14	A2	0.082	0.222826	amac	urea	FALSE
440	14	A2	0.075	0.203804	amac	urea	FALSE
445	14	A2	0.079	0.214674	amac	urea	FALSE
450	14	A2	0.089	0.241848	amac	urea	FALSE
455	14	A2	0.108	0.293478	amac	urea	FALSE
460	14	A2	0.132	0.358696	amac	urea	FALSE
465	14	A2	0.16	0.434783	amac	urea	FALSE
470	14	A2	0.18	0.48913	amac	urea	FALSE
475	14	A2	0.193	0.524457	amac	urea	FALSE
480	14	A2	0.211	0.57337	amac	urea	FALSE
485	14	A2	0.236	0.641304	amac	urea	FALSE
490	14	A2	0.274	0.744565	amac	urea	FALSE
495	14	A2	0.305	0.828804	amac	urea	TRUE
500	14	A2	0.3	0.815217	amac	urea	FALSE
505	14	A2	0.241	0.654891	amac	urea	FALSE
510	14	A2	0.139	0.377717	amac	urea	FALSE
515	14	A2	0.059	0.160326	amac	urea	FALSE
520	14	A2	0.025	0.0679348	amac	urea	FALSE
525	14	A2	0.01	0.0271739	amac	urea	FALSE
530	14	A2	0.006	0.0163043	amac	urea	FALSE
535	14	A2	0.003	0.00815217	amac	urea	FALSE
540	14	A2	0.003	0.00815217	amac	urea	FALSE
545	14	A2	0.003	0.00815217	amac	urea	FALSE
550	14	A2	0.002	0.00543478	amac	urea	FALSE
555	14	A2	0.002	0.00543478	amac	urea	FALSE
560	14	A2	0.003	0.00815217	amac	urea	FALSE
565	14	A2	0.002	0.00543478	amac	urea	FALSE
570	14	A2	0.003	0.00815217	amac	urea	FALSE
575	14	A2	0.002	0.00543478	amac	urea	FALSE
580	14	A2	0.002	0.00543478	amac	urea	FALSE
585	14	A2	0.002	0.00543478	amac	urea	FALSE
590	14	A2	0.002	0.00543478	amac	urea	FALSE
595	14	A2	0.002	0.00543478	amac	urea	FALSE
600	14	A2	0.002	0.00543478	amac	urea	FALSE
605	14	A2	0.002	0.00543478	amac	urea	FALSE
610	14	A2	0.003	0.00815217	amac	urea	FALSE
615	14	A2	0.003	0.00815217	amac	urea	FALSE
620	14	A2	0.002	0.00543478	amac	urea	FALSE
625	14	A2	0.003	0.00815217	amac	urea	FALSE
630	14	A2	0.002	0.00543478	amac	urea	FALSE
635	14	A2	0.002	0.00543478	amac	urea	FALSE
640	14	A2	0.003	0.00815217	amac	urea	FALSE
645	14	A2	0.003	0.00815217	amac	urea	FALSE
650	14	A2	0.003	0.00815217	amac	urea	FALSE
655	14	A2	0.002	0.00543478	amac	urea	FALSE
660	14	A2	0.003	0.00815217	amac	urea	FALSE
665	14	A2	0.002	0.00543478	amac	urea	FALSE
670	14	A2	0.002	0.00543478	amac	urea	FALSE
675	14	A2	0.002	0.00543478	amac	urea	FALSE
680	14	A2	0.002	0.00543478	amac	urea	FALSE
685	14	A2	0.003	0.00815217	amac	urea	FALSE
690	14	A2	0.002	0.00543478	amac	urea	FALSE
695	14	A2	0.002	0.00543478	amac	urea	FALSE
700	14	A2	0.002	0.00543478	amac	urea	FALSE
300	15	A2	0.062	0.168478	amac	urea	FALSE
305	15	A2	0.047	0.127717	amac	urea	FALSE
310	15	A2	0.042	0.11413	amac	urea	FALSE
315	15	A2	0.041	0.111413	amac	urea	FALSE
320	15	A2	0.041	0.111413	amac	urea	FALSE
325	15	A2	0.04	0.108696	amac	urea	FALSE
330	15	A2	0.041	0.111413	amac	urea	FALSE
335	15	A2	0.043	0.116848	amac	urea	FALSE
340	15	A2	0.048	0.130435	amac	urea	FALSE
345	15	A2	0.059	0.160326	amac	urea	FALSE
350	15	A2	0.073	0.19837	amac	urea	FALSE
355	15	A2	0.088	0.23913	amac	urea	FALSE
360	15	A2	0.106	0.288043	amac	urea	FALSE
365	15	A2	0.126	0.342391	amac	urea	FALSE
370	15	A2	0.15	0.407609	amac	urea	FALSE
375	15	A2	0.172	0.467391	amac	urea	FALSE
380	15	A2	0.187	0.508152	amac	urea	FALSE
385	15	A2	0.201	0.546196	amac	urea	FALSE
390	15	A2	0.212	0.576087	amac	urea	FALSE
395	15	A2	0.216	0.586957	amac	urea	FALSE
400	15	A2	0.211	0.57337	amac	urea	FALSE
405	15	A2	0.201	0.546196	amac	urea	FALSE
410	15	A2	0.184	0.5	amac	urea	FALSE
415	15	A2	0.161	0.4375	amac	urea	FALSE
420	15	A2	0.137	0.372283	amac	urea	FALSE
425	15	A2	0.117	0.317935	amac	urea	FALSE
430	15	A2	0.097	0.263587	amac	urea	FALSE
435	15	A2	0.081	0.220109	amac	urea	FALSE
440	15	A2	0.075	0.203804	amac	urea	FALSE
445	15	A2	0.078	0.211957	amac	urea	FALSE
450	15	A2	0.089	0.241848	amac	urea	FALSE
455	15	A2	0.107	0.290761	amac	urea	FALSE
460	15	A2	0.131	0.355978	amac	urea	FALSE
465	15	A2	0.158	0.429348	amac	urea	FALSE
470	15	A2	0.179	0.486413	amac	urea	FALSE
475	15	A2	0.191	0.519022	amac	urea	FALSE
480	15	A2	0.208	0.565217	amac	urea	FALSE
485	15	A2	0.233	0.633152	amac	urea	FALSE
490	15	A2	0.271	0.736413	amac	urea	FALSE
495	15	A2	0.3	0.815217	amac	urea	TRUE
500	15	A2	0.295	0.80163	amac	urea	FALSE
505	15	A2	0.236	0.641304	amac	urea	FALSE
510	15	A2	0.137	0.372283	amac	urea	FALSE
515	15	A2	0.059	0.160326	amac	urea	FALSE
520	15	A2	0.024	0.0652174	amac	urea	FALSE
525	15	A2	0.01	0.0271739	amac	urea	FALSE
530	15	A2	0.005	0.013587	amac	urea	FALSE
535	15	A2	0.004	0.0108696	amac	urea	FALSE
540	15	A2	0.002	0.00543478	amac	urea	FALSE
545	15	A2	0.003	0.00815217	amac	urea	FALSE
550	15	A2	0.002	0.00543478	amac	urea	FALSE
555	15	A2	0.002	0.00543478	amac	urea	FALSE
560	15	A2	0.002	0.00543478	amac	urea	FALSE
565	15	A2	0.002	0.00543478	amac	urea	FALSE
570	15	A2	0.003	0.00815217	amac	urea	FALSE
575	15	A2	0.003	0.00815217	amac	urea	FALSE
580	15	A2	0.003	0.00815217	amac	urea	FALSE
585	15	A2	0.003	0.00815217	amac	urea	FALSE
590	15	A2	0.003	0.00815217	amac	urea	FALSE
595	15	A2	0.002	0.00543478	amac	urea	FALSE
600	15	A2	0.003	0.00815217	amac	urea	FALSE
605	15	A2	0.003	0.00815217	amac	urea	FALSE
610	15	A2	0.003	0.00815217	amac	urea	FALSE
615	15	A2	0.003	0.00815217	amac	urea	FALSE
620	15	A2	0.003	0.00815217	amac	urea	FALSE
625	15	A2	0.003	0.00815217	amac	urea	FALSE
630	15	A2	0.003	0.00815217	amac	urea	FALSE
635	15	A2	0.003	0.00815217	amac	urea	FALSE
640	15	A2	0.002	0.00543478	amac	urea	FALSE
645	15	A2	0.003	0.00815217	amac	urea	FALSE
650	15	A2	0.003	0.00815217	amac	urea	FALSE
655	15	A2	0.003	0.00815217	amac	urea	FALSE
660	15	A2	0.003	0.00815217	amac	urea	FALSE
665	15	A2	0.002	0.00543478	amac	urea	FALSE
670	15	A2	0.002	0.00543478	amac	urea	FALSE
675	15	A2	0.003	0.00815217	amac	urea	FALSE
680	15	A2	0.002	0.00543478	amac	urea	FALSE
685	15	A2	0.003	0.00815217	amac	urea	FALSE
690	15	A2	0.003	0.00815217	amac	urea	FALSE
695	15	A2	0.003	0.00815217	amac	urea	FALSE
700	15	A2	0.002	0.00543478	amac	urea	FALSE
300	16	A2	0.061	0.165761	amac	urea	FALSE
305	16	A2	0.048	0.130435	amac	urea	FALSE
310	16	A2	0.042	0.11413	amac	urea	FALSE
315	16	A2	0.042	0.11413	amac	urea	FALSE
320	16	A2	0.041	0.111413	amac	urea	FALSE
325	16	A2	0.042	0.11413	amac	urea	FALSE
330	16	A2	0.042	0.11413	amac	urea	FALSE
335	16	A2	0.044	0.119565	amac	urea	FALSE
340	16	A2	0.049	0.133152	amac	urea	FALSE
345	16	A2	0.059	0.160326	amac	urea	FALSE
350	16	A2	0.073	0.19837	amac	urea	FALSE
355	16	A2	0.089	0.241848	amac	urea	FALSE
360	16	A2	0.106	0.288043	amac	urea	FALSE
365	16	A2	0.127	0.345109	amac	urea	FALSE
370	16	A2	0.15	0.407609	amac	urea	FALSE
375	16	A2	0.172	0.467391	amac	urea	FALSE
380	16	A2	0.187	0.508152	amac	urea	FALSE
385	16	A2	0.201	0.546196	amac	urea	FALSE
390	16	A2	0.212	0.576087	amac	urea	FALSE
395	16	A2	0.215	0.584239	amac	urea	FALSE
400	16	A2	0.211	0.57337	amac	urea	FALSE
405	16	A2	0.2	0.543478	amac	urea	FALSE
410	16	A2	0.183	0.497283	amac	urea	FALSE
415	16	A2	0.161	0.4375	amac	urea	FALSE
420	16	A2	0.136	0.369565	amac	urea	FALSE
425	16	A2	0.115	0.3125	amac	urea	FALSE
430	16	A2	0.096	0.26087	amac	urea	FALSE
435	16	A2	0.08	0.217391	amac	urea	FALSE
440	16	A2	0.074	0.201087	amac	urea	FALSE
445	16	A2	0.079	0.214674	amac	urea	FALSE
450	16	A2	0.088	0.23913	amac	urea	FALSE
455	16	A2	0.106	0.288043	amac	urea	FALSE
460	16	A2	0.129	0.350543	amac	urea	FALSE
465	16	A2	0.156	0.423913	amac	urea	FALSE
470	16	A2	0.177	0.480978	amac	urea	FALSE
475	16	A2	0.188	0.51087	amac	urea	FALSE
480	16	A2	0.204	0.554348	amac	urea	FALSE
485	16	A2	0.229	0.622283	amac	urea	FALSE
490	16	A2	0.266	0.722826	amac	urea	FALSE
495	16	A2	0.296	0.804348	amac	urea	TRUE
500	16	A2	0.29	0.788043	amac	urea	FALSE
505	16	A2	0.232	0.630435	amac	urea	FALSE
510	16	A2	0.135	0.366848	amac	urea	FALSE
515	16	A2	0.057	0.154891	amac	urea	FALSE
520	16	A2	0.024	0.0652174	amac	urea	FALSE
525	16	A2	0.009	0.0244565	amac	urea	FALSE
530	16	A2	0.005	0.013587	amac	urea	FALSE
535	16	A2	0.003	0.00815217	amac	urea	FALSE
540	16	A2	0.003	0.00815217	amac	urea	FALSE
545	16	A2	0.003	0.00815217	amac	urea	FALSE
550	16	A2	0.002	0.00543478	amac	urea	FALSE
555	16	A2	0.002	0.00543478	amac	urea	FALSE
560	16	A2	0.002	0.00543478	amac	urea	FALSE
565	16	A2	0.003	0.00815217	amac	urea	FALSE
570	16	A2	0.003	0.00815217	amac	urea	FALSE
575	16	A2	0.003	0.00815217	amac	urea	FALSE
580	16	A2	0.003	0.00815217	amac	urea	FALSE
585	16	A2	0.002	0.00543478	amac	urea	FALSE
590	16	A2	0.002	0.00543478	amac	urea	FALSE
595	16	A2	0.002	0.00543478	amac	urea	FALSE
600	16	A2	0.002	0.00543478	amac	urea	FALSE
605	16	A2	0.002	0.00543478	amac	urea	FALSE
610	16	A2	0.002	0.00543478	amac	urea	FALSE
615	16	A2	0.003	0.00815217	amac	urea	FALSE
620	16	A2	0.003	0.00815217	amac	urea	FALSE
625	16	A2	0.002	0.00543478	amac	urea	FALSE
630	16	A2	0.002	0.00543478	amac	urea	FALSE
635	16	A2	0.002	0.00543478	amac	urea	FALSE
640	16	A2	0.002	0.00543478	amac	urea	FALSE
645	16	A2	0.003	0.00815217	amac	urea	FALSE
650	16	A2	0.003	0.00815217	amac	urea	FALSE
655	16	A2	0.002	0.00543478	amac	urea	FALSE
660	16	A2	0.002	0.00543478	amac	urea	FALSE
665	16	A2	0.002	0.00543478	amac	urea	FALSE
670	16	A2	0.002	0.00543478	amac	urea	FALSE
675	16	A2	0.003	0.00815217	amac	urea	FALSE
680	16	A2	0.002	0.00543478	amac	urea	FALSE
685	16	A2	0.003	0.00815217	amac	urea	FALSE
690	16	A2	0.001	0.00271739	amac	urea	FALSE
695	16	A2	0.003	0.00815217	amac	urea	FALSE
700	16	A2	0.002	0.00543478	amac	urea	FALSE
300	17	A2	0.063	0.171196	amac	urea	FALSE
305	17	A2	0.048	0.130435	amac	urea	FALSE
310	17	A2	0.043	0.116848	amac	urea	FALSE
315	17	A2	0.042	0.11413	amac	urea	FALSE
320	17	A2	0.042	0.11413	amac	urea	FALSE
325	17	A2	0.041	0.111413	amac	urea	FALSE
330	17	A2	0.042	0.11413	amac	urea	FALSE
335	17	A2	0.044	0.119565	amac	urea	FALSE
340	17	A2	0.05	0.13587	amac	urea	FALSE
345	17	A2	0.06	0.163043	amac	urea	FALSE
350	17	A2	0.074	0.201087	amac	urea	FALSE
355	17	A2	0.09	0.244565	amac	urea	FALSE
360	17	A2	0.107	0.290761	amac	urea	FALSE
365	17	A2	0.127	0.345109	amac	urea	FALSE
370	17	A2	0.152	0.413043	amac	urea	FALSE
375	17	A2	0.173	0.470109	amac	urea	FALSE
380	17	A2	0.188	0.51087	amac	urea	FALSE
385	17	A2	0.201	0.546196	amac	urea	FALSE
390	17	A2	0.212	0.576087	amac	urea	FALSE
395	17	A2	0.214	0.581522	amac	urea	FALSE
400	17	A2	0.209	0.567935	amac	urea	FALSE
405	17	A2	0.198	0.538043	amac	urea	FALSE
410	17	A2	0.182	0.494565	amac	urea	FALSE
415	17	A2	0.159	0.432065	amac	urea	FALSE
420	17	A2	0.135	0.366848	amac	urea	FALSE
425	17	A2	0.115	0.3125	amac	urea	FALSE
430	17	A2	0.095	0.258152	amac	urea	FALSE
435	17	A2	0.08	0.217391	amac	urea	FALSE
440	17	A2	0.073	0.19837	amac	urea	FALSE
445	17	A2	0.078	0.211957	amac	urea	FALSE
450	17	A2	0.087	0.236413	amac	urea	FALSE
455	17	A2	0.105	0.285326	amac	urea	FALSE
460	17	A2	0.127	0.345109	amac	urea	FALSE
465	17	A2	0.154	0.418478	amac	urea	FALSE
470	17	A2	0.174	0.472826	amac	urea	FALSE
475	17	A2	0.186	0.505435	amac	urea	FALSE
480	17	A2	0.202	0.548913	amac	urea	FALSE
485	17	A2	0.226	0.61413	amac	urea	FALSE
490	17	A2	0.262	0.711957	amac	urea	FALSE
495	17	A2	0.291	0.790761	amac	urea	TRUE
500	17	A2	0.286	0.777174	amac	urea	FALSE
505	17	A2	0.227	0.616848	amac	urea	FALSE
510	17	A2	0.132	0.358696	amac	urea	FALSE
515	17	A2	0.056	0.152174	amac	urea	FALSE
520	17	A2	0.024	0.0652174	amac	urea	FALSE
525	17	A2	0.009	0.0244565	amac	urea	FALSE
530	17	A2	0.004	0.0108696	amac	urea	FALSE
535	17	A2	0.003	0.00815217	amac	urea	FALSE
540	17	A2	0.001	0.00271739	amac	urea	FALSE
545	17	A2	0.002	0.00543478	amac	urea	FALSE
550	17	A2	0.002	0.00543478	amac	urea	FALSE
555	17	A2	0.002	0.00543478	amac	urea	FALSE
560	17	A2	0.002	0.00543478	amac	urea	FALSE
565	17	A2	0.002	0.00543478	amac	urea	FALSE
570	17	A2	0.002	0.00543478	amac	urea	FALSE
575	17	A2	0.002	0.00543478	amac	urea	FALSE
580	17	A2	0.003	0.00815217	amac	urea	FALSE
585	17	A2	0.002	0.00543478	amac	urea	FALSE
590	17	A2	0.002	0.00543478	amac	urea	FALSE
595	17	A2	0.002	0.00543478	amac	urea	FALSE
600	17	A2	0.002	0.00543478	amac	urea	FALSE
605	17	A2	0.003	0.00815217	amac	urea	FALSE
610	17	A2	0.002	0.00543478	amac	urea	FALSE
615	17	A2	0.002	0.00543478	amac	urea	FALSE
620	17	A2	0.002	0.00543478	amac	urea	FALSE
625	17	A2	0.002	0.00543478	amac	urea	FALSE
630	17	A2	0.002	0.00543478	amac	urea	FALSE
635	17	A2	0.002	0.00543478	amac	urea	FALSE
640	17	A2	0.003	0.00815217	amac	urea	FALSE
645	17	A2	0.002	0.00543478	amac	urea	FALSE
650	17	A2	0.002	0.00543478	amac	urea	FALSE
655	17	A2	0.002	0.00543478	amac	urea	FALSE
660	17	A2	0.002	0.00543478	amac	urea	FALSE
665	17	A2	0.002	0.00543478	amac	urea	FALSE
670	17	A2	0.002	0.00543478	amac	urea	FALSE
675	17	A2	0.002	0.00543478	amac	urea	FALSE
680	17	A2	0.001	0.00271739	amac	urea	FALSE
685	17	A2	0.002	0.00543478	amac	urea	FALSE
690	17	A2	0.002	0.00543478	amac	urea	FALSE
695	17	A2	0.002	0.00543478	amac	urea	FALSE
700	17	A2	0.002	0.00543478	amac	urea	FALSE
300	18	A2	0.064	0.173913	amac	urea	FALSE
305	18	A2	0.049	0.133152	amac	urea	FALSE
310	18	A2	0.043	0.116848	amac	urea	FALSE
315	18	A2	0.043	0.116848	amac	urea	FALSE
320	18	A2	0.042	0.11413	amac	urea	FALSE
325	18	A2	0.043	0.116848	amac	urea	FALSE
330	18	A2	0.042	0.11413	amac	urea	FALSE
335	18	A2	0.045	0.122283	amac	urea	FALSE
340	18	A2	0.049	0.133152	amac	urea	FALSE
345	18	A2	0.06	0.163043	amac	urea	FALSE
350	18	A2	0.074	0.201087	amac	urea	FALSE
355	18	A2	0.089	0.241848	amac	urea	FALSE
360	18	A2	0.107	0.290761	amac	urea	FALSE
365	18	A2	0.127	0.345109	amac	urea	FALSE
370	18	A2	0.152	0.413043	amac	urea	FALSE
375	18	A2	0.173	0.470109	amac	urea	FALSE
380	18	A2	0.187	0.508152	amac	urea	FALSE
385	18	A2	0.2	0.543478	amac	urea	FALSE
390	18	A2	0.211	0.57337	amac	urea	FALSE
395	18	A2	0.214	0.581522	amac	urea	FALSE
400	18	A2	0.21	0.570652	amac	urea	FALSE
405	18	A2	0.199	0.540761	amac	urea	FALSE
410	18	A2	0.182	0.494565	amac	urea	FALSE
415	18	A2	0.159	0.432065	amac	urea	FALSE
420	18	A2	0.135	0.366848	amac	urea	FALSE
425	18	A2	0.114	0.309783	amac	urea	FALSE
430	18	A2	0.095	0.258152	amac	urea	FALSE
435	18	A2	0.079	0.214674	amac	urea	FALSE
440	18	A2	0.073	0.19837	amac	urea	FALSE
445	18	A2	0.076	0.206522	amac	urea	FALSE
450	18	A2	0.086	0.233696	amac	urea	FALSE
455	18	A2	0.104	0.282609	amac	urea	FALSE
460	18	A2	0.126	0.342391	amac	urea	FALSE
465	18	A2	0.152	0.413043	amac	urea	FALSE
470	18	A2	0.171	0.464674	amac	urea	FALSE
475	18	A2	0.183	0.497283	amac	urea	FALSE
480	18	A2	0.199	0.540761	amac	urea	FALSE
485	18	A2	0.223	0.605978	amac	urea	FALSE
490	18	A2	0.259	0.703804	amac	urea	FALSE
495	18	A2	0.286	0.777174	amac	urea	TRUE
500	18	A2	0.281	0.763587	amac	urea	FALSE
505	18	A2	0.224	0.608696	amac	urea	FALSE
510	18	A2	0.131	0.355978	amac	urea	FALSE
515	18	A2	0.056	0.152174	amac	urea	FALSE
520	18	A2	0.023	0.0625	amac	urea	FALSE
525	18	A2	0.009	0.0244565	amac	urea	FALSE
530	18	A2	0.005	0.013587	amac	urea	FALSE
535	18	A2	0.003	0.00815217	amac	urea	FALSE
540	18	A2	0.003	0.00815217	amac	urea	FALSE
545	18	A2	0.002	0.00543478	amac	urea	FALSE
550	18	A2	0.002	0.00543478	amac	urea	FALSE
555	18	A2	0.002	0.00543478	amac	urea	FALSE
560	18	A2	0.002	0.00543478	amac	urea	FALSE
565	18	A2	0.002	0.00543478	amac	urea	FALSE
570	18	A2	0.002	0.00543478	amac	urea	FALSE
575	18	A2	0.003	0.00815217	amac	urea	FALSE
580	18	A2	0.002	0.00543478	amac	urea	FALSE
585	18	A2	0.002	0.00543478	amac	urea	FALSE
590	18	A2	0.002	0.00543478	amac	urea	FALSE
595	18	A2	0.002	0.00543478	amac	urea	FALSE
600	18	A2	0.002	0.00543478	amac	urea	FALSE
605	18	A2	0.002	0.00543478	amac	urea	FALSE
610	18	A2	0.003	0.00815217	amac	urea	FALSE
615	18	A2	0.003	0.00815217	amac	urea	FALSE
620	18	A2	0.002	0.00543478	amac	urea	FALSE
625	18	A2	0.002	0.00543478	amac	urea	FALSE
630	18	A2	0.002	0.00543478	amac	urea	FALSE
635	18	A2	0.002	0.00543478	amac	urea	FALSE
640	18	A2	0.002	0.00543478	amac	urea	FALSE
645	18	A2	0.003	0.00815217	amac	urea	FALSE
650	18	A2	0.002	0.00543478	amac	urea	FALSE
655	18	A2	0.002	0.00543478	amac	urea	FALSE
660	18	A2	0.002	0.00543478	amac	urea	FALSE
665	18	A2	0.002	0.00543478	amac	urea	FALSE
670	18	A2	0.002	0.00543478	amac	urea	FALSE
675	18	A2	0.002	0.00543478	amac	urea	FALSE
680	18	A2	0.002	0.00543478	amac	urea	FALSE
685	18	A2	0.002	0.00543478	amac	urea	FALSE
690	18	A2	0.002	0.00543478	amac	urea	FALSE
695	18	A2	0.002	0.00543478	amac	urea	FALSE
700	18	A2	0.002	0.00543478	amac	urea	FALSE
300	19	A2	0.061	0.165761	amac	urea	FALSE
305	19	A2	0.049	0.133152	amac	urea	FALSE
310	19	A2	0.045	0.122283	amac	urea	FALSE
315	19	A2	0.043	0.116848	amac	urea	FALSE
320	19	A2	0.043	0.116848	amac	urea	FALSE
325	19	A2	0.043	0.116848	amac	urea	FALSE
330	19	A2	0.043	0.116848	amac	urea	FALSE
335	19	A2	0.045	0.122283	amac	urea	FALSE
340	19	A2	0.05	0.13587	amac	urea	FALSE
345	19	A2	0.061	0.165761	amac	urea	FALSE
350	19	A2	0.075	0.203804	amac	urea	FALSE
355	19	A2	0.09	0.244565	amac	urea	FALSE
360	19	A2	0.108	0.293478	amac	urea	FALSE
365	19	A2	0.128	0.347826	amac	urea	FALSE
370	19	A2	0.153	0.415761	amac	urea	FALSE
375	19	A2	0.174	0.472826	amac	urea	FALSE
380	19	A2	0.188	0.51087	amac	urea	FALSE
385	19	A2	0.201	0.546196	amac	urea	FALSE
390	19	A2	0.212	0.576087	amac	urea	FALSE
395	19	A2	0.214	0.581522	amac	urea	FALSE
400	19	A2	0.208	0.565217	amac	urea	FALSE
405	19	A2	0.198	0.538043	amac	urea	FALSE
410	19	A2	0.182	0.494565	amac	urea	FALSE
415	19	A2	0.159	0.432065	amac	urea	FALSE
420	19	A2	0.135	0.366848	amac	urea	FALSE
425	19	A2	0.114	0.309783	amac	urea	FALSE
430	19	A2	0.095	0.258152	amac	urea	FALSE
435	19	A2	0.079	0.214674	amac	urea	FALSE
440	19	A2	0.073	0.19837	amac	urea	FALSE
445	19	A2	0.076	0.206522	amac	urea	FALSE
450	19	A2	0.086	0.233696	amac	urea	FALSE
455	19	A2	0.103	0.279891	amac	urea	FALSE
460	19	A2	0.125	0.339674	amac	urea	FALSE
465	19	A2	0.15	0.407609	amac	urea	FALSE
470	19	A2	0.169	0.459239	amac	urea	FALSE
475	19	A2	0.181	0.491848	amac	urea	FALSE
480	19	A2	0.196	0.532609	amac	urea	FALSE
485	19	A2	0.219	0.595109	amac	urea	FALSE
490	19	A2	0.255	0.692935	amac	urea	FALSE
495	19	A2	0.281	0.763587	amac	urea	TRUE
500	19	A2	0.277	0.752717	amac	urea	FALSE
505	19	A2	0.221	0.600543	amac	urea	FALSE
510	19	A2	0.129	0.350543	amac	urea	FALSE
515	19	A2	0.055	0.149457	amac	urea	FALSE
520	19	A2	0.023	0.0625	amac	urea	FALSE
525	19	A2	0.009	0.0244565	amac	urea	FALSE
530	19	A2	0.005	0.013587	amac	urea	FALSE
535	19	A2	0.003	0.00815217	amac	urea	FALSE
540	19	A2	0.003	0.00815217	amac	urea	FALSE
545	19	A2	0.003	0.00815217	amac	urea	FALSE
550	19	A2	0.003	0.00815217	amac	urea	FALSE
555	19	A2	0.003	0.00815217	amac	urea	FALSE
560	19	A2	0.002	0.00543478	amac	urea	FALSE
565	19	A2	0.002	0.00543478	amac	urea	FALSE
570	19	A2	0.002	0.00543478	amac	urea	FALSE
575	19	A2	0.003	0.00815217	amac	urea	FALSE
580	19	A2	0.003	0.00815217	amac	urea	FALSE
585	19	A2	0.003	0.00815217	amac	urea	FALSE
590	19	A2	0.003	0.00815217	amac	urea	FALSE
595	19	A2	0.002	0.00543478	amac	urea	FALSE
600	19	A2	0.002	0.00543478	amac	urea	FALSE
605	19	A2	0.002	0.00543478	amac	urea	FALSE
610	19	A2	0.002	0.00543478	amac	urea	FALSE
615	19	A2	0.003	0.00815217	amac	urea	FALSE
620	19	A2	0.002	0.00543478	amac	urea	FALSE
625	19	A2	0.002	0.00543478	amac	urea	FALSE
630	19	A2	0.003	0.00815217	amac	urea	FALSE
635	19	A2	0.003	0.00815217	amac	urea	FALSE
640	19	A2	0.003	0.00815217	amac	urea	FALSE
645	19	A2	0.003	0.00815217	amac	urea	FALSE
650	19	A2	0.003	0.00815217	amac	urea	FALSE
655	19	A2	0.002	0.00543478	amac	urea	FALSE
660	19	A2	0.002	0.00543478	amac	urea	FALSE
665	19	A2	0.002	0.00543478	amac	urea	FALSE
670	19	A2	0.002	0.00543478	amac	urea	FALSE
675	19	A2	0.003	0.00815217	amac	urea	FALSE
680	19	A2	0.002	0.00543478	amac	urea	FALSE
685	19	A2	0.003	0.00815217	amac	urea	FALSE
690	19	A2	0.002	0.00543478	amac	urea	FALSE
695	19	A2	0.002	0.00543478	amac	urea	FALSE
700	19	A2	0.002	0.00543478	amac	urea	FALSE
300	20	A2	0.062	0.168478	amac	urea	FALSE
305	20	A2	0.05	0.13587	amac	urea	FALSE
310	20	A2	0.043	0.116848	amac	urea	FALSE
315	20	A2	0.044	0.119565	amac	urea	FALSE
320	20	A2	0.043	0.116848	amac	urea	FALSE
325	20	A2	0.043	0.116848	amac	urea	FALSE
330	20	A2	0.044	0.119565	amac	urea	FALSE
335	20	A2	0.046	0.125	amac	urea	FALSE
340	20	A2	0.051	0.138587	amac	urea	FALSE
345	20	A2	0.062	0.168478	amac	urea	FALSE
350	20	A2	0.075	0.203804	amac	urea	FALSE
355	20	A2	0.092	0.25	amac	urea	FALSE
360	20	A2	0.108	0.293478	amac	urea	FALSE
365	20	A2	0.128	0.347826	amac	urea	FALSE
370	20	A2	0.152	0.413043	amac	urea	FALSE
375	20	A2	0.174	0.472826	amac	urea	FALSE
380	20	A2	0.188	0.51087	amac	urea	FALSE
385	20	A2	0.201	0.546196	amac	urea	FALSE
390	20	A2	0.21	0.570652	amac	urea	FALSE
395	20	A2	0.214	0.581522	amac	urea	FALSE
400	20	A2	0.209	0.567935	amac	urea	FALSE
405	20	A2	0.197	0.535326	amac	urea	FALSE
410	20	A2	0.18	0.48913	amac	urea	FALSE
415	20	A2	0.158	0.429348	amac	urea	FALSE
420	20	A2	0.134	0.36413	amac	urea	FALSE
425	20	A2	0.114	0.309783	amac	urea	FALSE
430	20	A2	0.093	0.252717	amac	urea	FALSE
435	20	A2	0.08	0.217391	amac	urea	FALSE
440	20	A2	0.073	0.19837	amac	urea	FALSE
445	20	A2	0.076	0.206522	amac	urea	FALSE
450	20	A2	0.085	0.230978	amac	urea	FALSE
455	20	A2	0.101	0.274457	amac	urea	FALSE
460	20	A2	0.123	0.334239	amac	urea	FALSE
465	20	A2	0.148	0.402174	amac	urea	FALSE
470	20	A2	0.167	0.453804	amac	urea	FALSE
475	20	A2	0.179	0.486413	amac	urea	FALSE
480	20	A2	0.194	0.527174	amac	urea	FALSE
485	20	A2	0.216	0.586957	amac	urea	FALSE
490	20	A2	0.25	0.679348	amac	urea	FALSE
495	20	A2	0.277	0.752717	amac	urea	TRUE
500	20	A2	0.271	0.736413	amac	urea	FALSE
505	20	A2	0.216	0.586957	amac	urea	FALSE
510	20	A2	0.127	0.345109	amac	urea	FALSE
515	20	A2	0.055	0.149457	amac	urea	FALSE
520	20	A2	0.023	0.0625	amac	urea	FALSE
525	20	A2	0.009	0.0244565	amac	urea	FALSE
530	20	A2	0.006	0.0163043	amac	urea	FALSE
535	20	A2	0.004	0.0108696	amac	urea	FALSE
540	20	A2	0.003	0.00815217	amac	urea	FALSE
545	20	A2	0.003	0.00815217	amac	urea	FALSE
550	20	A2	0.003	0.00815217	amac	urea	FALSE
555	20	A2	0.003	0.00815217	amac	urea	FALSE
560	20	A2	0.003	0.00815217	amac	urea	FALSE
565	20	A2	0.003	0.00815217	amac	urea	FALSE
570	20	A2	0.002	0.00543478	amac	urea	FALSE
575	20	A2	0.003	0.00815217	amac	urea	FALSE
580	20	A2	0.003	0.00815217	amac	urea	FALSE
585	20	A2	0.003	0.00815217	amac	urea	FALSE
590	20	A2	0.003	0.00815217	amac	urea	FALSE
595	20	A2	0.003	0.00815217	amac	urea	FALSE
600	20	A2	0.003	0.00815217	amac	urea	FALSE
605	20	A2	0.003	0.00815217	amac	urea	FALSE
610	20	A2	0.003	0.00815217	amac	urea	FALSE
615	20	A2	0.003	0.00815217	amac	urea	FALSE
620	20	A2	0.003	0.00815217	amac	urea	FALSE
625	20	A2	0.003	0.00815217	amac	urea	FALSE
630	20	A2	0.003	0.00815217	amac	urea	FALSE
635	20	A2	0.003	0.00815217	amac	urea	FALSE
640	20	A2	0.002	0.00543478	amac	urea	FALSE
645	20	A2	0.002	0.00543478	amac	urea	FALSE
650	20	A2	0.003	0.00815217	amac	urea	FALSE
655	20	A2	0.003	0.00815217	amac	urea	FALSE
660	20	A2	0.003	0.00815217	amac	urea	FALSE
665	20	A2	0.003	0.00815217	amac	urea	FALSE
670	20	A2	0.003	0.00815217	amac	urea	FALSE
675	20	A2	0.002	0.00543478	amac	urea	FALSE
680	20	A2	0.003	0.00815217	amac	urea	FALSE
685	20	A2	0.002	0.00543478	amac	urea	FALSE
690	20	A2	0.002	0.00543478	amac	urea	FALSE
695	20	A2	0.002	0.00543478	amac	urea	FALSE
700	20	A2	0.002	0.00543478	amac	urea	FALSE
300	21	A2	0.065	0.17663	amac	urea	FALSE
305	21	A2	0.051	0.138587	amac	urea	FALSE
310	21	A2	0.046	0.125	amac	urea	FALSE
315	21	A2	0.045	0.122283	amac	urea	FALSE
320	21	A2	0.044	0.119565	amac	urea	FALSE
325	21	A2	0.043	0.116848	amac	urea	FALSE
330	21	A2	0.044	0.119565	amac	urea	FALSE
335	21	A2	0.045	0.122283	amac	urea	FALSE
340	21	A2	0.051	0.138587	amac	urea	FALSE
345	21	A2	0.062	0.168478	amac	urea	FALSE
350	21	A2	0.076	0.206522	amac	urea	FALSE
355	21	A2	0.091	0.247283	amac	urea	FALSE
360	21	A2	0.109	0.296196	amac	urea	FALSE
365	21	A2	0.129	0.350543	amac	urea	FALSE
370	21	A2	0.152	0.413043	amac	urea	FALSE
375	21	A2	0.173	0.470109	amac	urea	FALSE
380	21	A2	0.188	0.51087	amac	urea	FALSE
385	21	A2	0.201	0.546196	amac	urea	FALSE
390	21	A2	0.21	0.570652	amac	urea	FALSE
395	21	A2	0.214	0.581522	amac	urea	FALSE
400	21	A2	0.208	0.565217	amac	urea	FALSE
405	21	A2	0.197	0.535326	amac	urea	FALSE
410	21	A2	0.18	0.48913	amac	urea	FALSE
415	21	A2	0.158	0.429348	amac	urea	FALSE
420	21	A2	0.134	0.36413	amac	urea	FALSE
425	21	A2	0.113	0.307065	amac	urea	FALSE
430	21	A2	0.094	0.255435	amac	urea	FALSE
435	21	A2	0.079	0.214674	amac	urea	FALSE
440	21	A2	0.072	0.195652	amac	urea	FALSE
445	21	A2	0.076	0.206522	amac	urea	FALSE
450	21	A2	0.084	0.228261	amac	urea	FALSE
455	21	A2	0.1	0.271739	amac	urea	FALSE
460	21	A2	0.121	0.328804	amac	urea	FALSE
465	21	A2	0.147	0.399457	amac	urea	FALSE
470	21	A2	0.165	0.44837	amac	urea	FALSE
475	21	A2	0.176	0.478261	amac	urea	FALSE
480	21	A2	0.191	0.519022	amac	urea	FALSE
485	21	A2	0.213	0.578804	amac	urea	FALSE
490	21	A2	0.247	0.671196	amac	urea	FALSE
495	21	A2	0.273	0.741848	amac	urea	TRUE
500	21	A2	0.268	0.728261	amac	urea	FALSE
505	21	A2	0.214	0.581522	amac	urea	FALSE
510	21	A2	0.124	0.336957	amac	urea	FALSE
515	21	A2	0.053	0.144022	amac	urea	FALSE
520	21	A2	0.023	0.0625	amac	urea	FALSE
525	21	A2	0.009	0.0244565	amac	urea	FALSE
530	21	A2	0.005	0.013587	amac	urea	FALSE
535	21	A2	0.004	0.0108696	amac	urea	FALSE
540	21	A2	0.002	0.00543478	amac	urea	FALSE
545	21	A2	0.003	0.00815217	amac	urea	FALSE
550	21	A2	0.003	0.00815217	amac	urea	FALSE
555	21	A2	0.003	0.00815217	amac	urea	FALSE
560	21	A2	0.003	0.00815217	amac	urea	FALSE
565	21	A2	0.003	0.00815217	amac	urea	FALSE
570	21	A2	0.003	0.00815217	amac	urea	FALSE
575	21	A2	0.003	0.00815217	amac	urea	FALSE
580	21	A2	0.003	0.00815217	amac	urea	FALSE
585	21	A2	0.003	0.00815217	amac	urea	FALSE
590	21	A2	0.003	0.00815217	amac	urea	FALSE
595	21	A2	0.003	0.00815217	amac	urea	FALSE
600	21	A2	0.003	0.00815217	amac	urea	FALSE
605	21	A2	0.003	0.00815217	amac	urea	FALSE
610	21	A2	0.004	0.0108696	amac	urea	FALSE
615	21	A2	0.003	0.00815217	amac	urea	FALSE
620	21	A2	0.003	0.00815217	amac	urea	FALSE
625	21	A2	0.003	0.00815217	amac	urea	FALSE
630	21	A2	0.003	0.00815217	amac	urea	FALSE
635	21	A2	0.003	0.00815217	amac	urea	FALSE
640	21	A2	0.003	0.00815217	amac	urea	FALSE
645	21	A2	0.004	0.0108696	amac	urea	FALSE
650	21	A2	0.003	0.00815217	amac	urea	FALSE
655	21	A2	0.003	0.00815217	amac	urea	FALSE
660	21	A2	0.003	0.00815217	amac	urea	FALSE
665	21	A2	0.003	0.00815217	amac	urea	FALSE
670	21	A2	0.003	0.00815217	amac	urea	FALSE
675	21	A2	0.003	0.00815217	amac	urea	FALSE
680	21	A2	0.003	0.00815217	amac	urea	FALSE
685	21	A2	0.003	0.00815217	amac	urea	FALSE
690	21	A2	0.003	0.00815217	amac	urea	FALSE
695	21	A2	0.003	0.00815217	amac	urea	FALSE
700	21	A2	0.002	0.00543478	amac	urea	FALSE
300	22	A2	0.062	0.168478	amac	urea	FALSE
305	22	A2	0.049	0.133152	amac	urea	FALSE
310	22	A2	0.046	0.125	amac	urea	FALSE
315	22	A2	0.044	0.119565	amac	urea	FALSE
320	22	A2	0.043	0.116848	amac	urea	FALSE
325	22	A2	0.044	0.119565	amac	urea	FALSE
330	22	A2	0.045	0.122283	amac	urea	FALSE
335	22	A2	0.045	0.122283	amac	urea	FALSE
340	22	A2	0.051	0.138587	amac	urea	FALSE
345	22	A2	0.061	0.165761	amac	urea	FALSE
350	22	A2	0.076	0.206522	amac	urea	FALSE
355	22	A2	0.09	0.244565	amac	urea	FALSE
360	22	A2	0.107	0.290761	amac	urea	FALSE
365	22	A2	0.127	0.345109	amac	urea	FALSE
370	22	A2	0.151	0.410326	amac	urea	FALSE
375	22	A2	0.171	0.464674	amac	urea	FALSE
380	22	A2	0.185	0.502717	amac	urea	FALSE
385	22	A2	0.198	0.538043	amac	urea	FALSE
390	22	A2	0.207	0.5625	amac	urea	FALSE
395	22	A2	0.21	0.570652	amac	urea	FALSE
400	22	A2	0.204	0.554348	amac	urea	FALSE
405	22	A2	0.193	0.524457	amac	urea	FALSE
410	22	A2	0.176	0.478261	amac	urea	FALSE
415	22	A2	0.154	0.418478	amac	urea	FALSE
420	22	A2	0.131	0.355978	amac	urea	FALSE
425	22	A2	0.111	0.30163	amac	urea	FALSE
430	22	A2	0.091	0.247283	amac	urea	FALSE
435	22	A2	0.076	0.206522	amac	urea	FALSE
440	22	A2	0.071	0.192935	amac	urea	FALSE
445	22	A2	0.074	0.201087	amac	urea	FALSE
450	22	A2	0.083	0.225543	amac	urea	FALSE
455	22	A2	0.098	0.266304	amac	urea	FALSE
460	22	A2	0.119	0.32337	amac	urea	FALSE
465	22	A2	0.143	0.388587	amac	urea	FALSE
470	22	A2	0.16	0.434783	amac	urea	FALSE
475	22	A2	0.171	0.464674	amac	urea	FALSE
480	22	A2	0.185	0.502717	amac	urea	FALSE
485	22	A2	0.207	0.5625	amac	urea	FALSE
490	22	A2	0.239	0.649457	amac	urea	FALSE
495	22	A2	0.263	0.714674	amac	urea	TRUE
500	22	A2	0.259	0.703804	amac	urea	FALSE
505	22	A2	0.206	0.559783	amac	urea	FALSE
510	22	A2	0.12	0.326087	amac	urea	FALSE
515	22	A2	0.052	0.141304	amac	urea	FALSE
520	22	A2	0.023	0.0625	amac	urea	FALSE
525	22	A2	0.009	0.0244565	amac	urea	FALSE
530	22	A2	0.005	0.013587	amac	urea	FALSE
535	22	A2	0.004	0.0108696	amac	urea	FALSE
540	22	A2	0.003	0.00815217	amac	urea	FALSE
545	22	A2	0.003	0.00815217	amac	urea	FALSE
550	22	A2	0.002	0.00543478	amac	urea	FALSE
555	22	A2	0.003	0.00815217	amac	urea	FALSE
560	22	A2	0.003	0.00815217	amac	urea	FALSE
565	22	A2	0.003	0.00815217	amac	urea	FALSE
570	22	A2	0.003	0.00815217	amac	urea	FALSE
575	22	A2	0.002	0.00543478	amac	urea	FALSE
580	22	A2	0.003	0.00815217	amac	urea	FALSE
585	22	A2	0.003	0.00815217	amac	urea	FALSE
590	22	A2	0.003	0.00815217	amac	urea	FALSE
595	22	A2	0.003	0.00815217	amac	urea	FALSE
600	22	A2	0.003	0.00815217	amac	urea	FALSE
605	22	A2	0.004	0.0108696	amac	urea	FALSE
610	22	A2	0.003	0.00815217	amac	urea	FALSE
615	22	A2	0.003	0.00815217	amac	urea	FALSE
620	22	A2	0.004	0.0108696	amac	urea	FALSE
625	22	A2	0.003	0.00815217	amac	urea	FALSE
630	22	A2	0.003	0.00815217	amac	urea	FALSE
635	22	A2	0.003	0.00815217	amac	urea	FALSE
640	22	A2	0.003	0.00815217	amac	urea	FALSE
645	22	A2	0.004	0.0108696	amac	urea	FALSE
650	22	A2	0.003	0.00815217	amac	urea	FALSE
655	22	A2	0.003	0.00815217	amac	urea	FALSE
660	22	A2	0.003	0.00815217	amac	urea	FALSE
665	22	A2	0.003	0.00815217	amac	urea	FALSE
670	22	A2	0.003	0.00815217	amac	urea	FALSE
675	22	A2	0.003	0.00815217	amac	urea	FALSE
680	22	A2	0.003	0.00815217	amac	urea	FALSE
685	22	A2	0.002	0.00543478	amac	urea	FALSE
690	22	A2	0.003	0.00815217	amac	urea	FALSE
695	22	A2	0.003	0.00815217	amac	urea	FALSE
700	22	A2	0.003	0.00815217	amac	urea	FALSE
300	23	A2	0.063	0.171196	amac	urea	FALSE
305	23	A2	0.05	0.13587	amac	urea	FALSE
310	23	A2	0.046	0.125	amac	urea	FALSE
315	23	A2	0.044	0.119565	amac	urea	FALSE
320	23	A2	0.043	0.116848	amac	urea	FALSE
325	23	A2	0.044	0.119565	amac	urea	FALSE
330	23	A2	0.044	0.119565	amac	urea	FALSE
335	23	A2	0.046	0.125	amac	urea	FALSE
340	23	A2	0.052	0.141304	amac	urea	FALSE
345	23	A2	0.061	0.165761	amac	urea	FALSE
350	23	A2	0.075	0.203804	amac	urea	FALSE
355	23	A2	0.091	0.247283	amac	urea	FALSE
360	23	A2	0.107	0.290761	amac	urea	FALSE
365	23	A2	0.127	0.345109	amac	urea	FALSE
370	23	A2	0.151	0.410326	amac	urea	FALSE
375	23	A2	0.171	0.464674	amac	urea	FALSE
380	23	A2	0.185	0.502717	amac	urea	FALSE
385	23	A2	0.197	0.535326	amac	urea	FALSE
390	23	A2	0.207	0.5625	amac	urea	FALSE
395	23	A2	0.209	0.567935	amac	urea	FALSE
400	23	A2	0.203	0.55163	amac	urea	FALSE
405	23	A2	0.192	0.521739	amac	urea	FALSE
410	23	A2	0.176	0.478261	amac	urea	FALSE
415	23	A2	0.153	0.415761	amac	urea	FALSE
420	23	A2	0.129	0.350543	amac	urea	FALSE
425	23	A2	0.11	0.298913	amac	urea	FALSE
430	23	A2	0.091	0.247283	amac	urea	FALSE
435	23	A2	0.076	0.206522	amac	urea	FALSE
440	23	A2	0.069	0.1875	amac	urea	FALSE
445	23	A2	0.073	0.19837	amac	urea	FALSE
450	23	A2	0.081	0.220109	amac	urea	FALSE
455	23	A2	0.096	0.26087	amac	urea	FALSE
460	23	A2	0.117	0.317935	amac	urea	FALSE
465	23	A2	0.141	0.383152	amac	urea	FALSE
470	23	A2	0.158	0.429348	amac	urea	FALSE
475	23	A2	0.168	0.456522	amac	urea	FALSE
480	23	A2	0.182	0.494565	amac	urea	FALSE
485	23	A2	0.203	0.55163	amac	urea	FALSE
490	23	A2	0.235	0.638587	amac	urea	FALSE
495	23	A2	0.259	0.703804	amac	urea	TRUE
500	23	A2	0.254	0.690217	amac	urea	FALSE
505	23	A2	0.204	0.554348	amac	urea	FALSE
510	23	A2	0.118	0.320652	amac	urea	FALSE
515	23	A2	0.05	0.13587	amac	urea	FALSE
520	23	A2	0.021	0.0570652	amac	urea	FALSE
525	23	A2	0.009	0.0244565	amac	urea	FALSE
530	23	A2	0.005	0.013587	amac	urea	FALSE
535	23	A2	0.003	0.00815217	amac	urea	FALSE
540	23	A2	0.003	0.00815217	amac	urea	FALSE
545	23	A2	0.003	0.00815217	amac	urea	FALSE
550	23	A2	0.003	0.00815217	amac	urea	FALSE
555	23	A2	0.003	0.00815217	amac	urea	FALSE
560	23	A2	0.002	0.00543478	amac	urea	FALSE
565	23	A2	0.003	0.00815217	amac	urea	FALSE
570	23	A2	0.002	0.00543478	amac	urea	FALSE
575	23	A2	0.002	0.00543478	amac	urea	FALSE
580	23	A2	0.003	0.00815217	amac	urea	FALSE
585	23	A2	0.003	0.00815217	amac	urea	FALSE
590	23	A2	0.003	0.00815217	amac	urea	FALSE
595	23	A2	0.003	0.00815217	amac	urea	FALSE
600	23	A2	0.003	0.00815217	amac	urea	FALSE
605	23	A2	0.003	0.00815217	amac	urea	FALSE
610	23	A2	0.003	0.00815217	amac	urea	FALSE
615	23	A2	0.002	0.00543478	amac	urea	FALSE
620	23	A2	0.003	0.00815217	amac	urea	FALSE
625	23	A2	0.003	0.00815217	amac	urea	FALSE
630	23	A2	0.003	0.00815217	amac	urea	FALSE
635	23	A2	0.003	0.00815217	amac	urea	FALSE
640	23	A2	0.004	0.0108696	amac	urea	FALSE
645	23	A2	0.003	0.00815217	amac	urea	FALSE
650	23	A2	0.003	0.00815217	amac	urea	FALSE
655	23	A2	0.003	0.00815217	amac	urea	FALSE
660	23	A2	0.003	0.00815217	amac	urea	FALSE
665	23	A2	0.003	0.00815217	amac	urea	FALSE
670	23	A2	0.003	0.00815217	amac	urea	FALSE
675	23	A2	0.003	0.00815217	amac	urea	FALSE
680	23	A2	0.003	0.00815217	amac	urea	FALSE
685	23	A2	0.003	0.00815217	amac	urea	FALSE
690	23	A2	0.002	0.00543478	amac	urea	FALSE
695	23	A2	0.003	0.00815217	amac	urea	FALSE
700	23	A2	0.003	0.00815217	amac	urea	FALSE
300	24	A2	0.063	0.171196	amac	urea	FALSE
305	24	A2	0.049	0.133152	amac	urea	FALSE
310	24	A2	0.047	0.127717	amac	urea	FALSE
315	24	A2	0.045	0.122283	amac	urea	FALSE
320	24	A2	0.044	0.119565	amac	urea	FALSE
325	24	A2	0.044	0.119565	amac	urea	FALSE
330	24	A2	0.045	0.122283	amac	urea	FALSE
335	24	A2	0.047	0.127717	amac	urea	FALSE
340	24	A2	0.052	0.141304	amac	urea	FALSE
345	24	A2	0.062	0.168478	amac	urea	FALSE
350	24	A2	0.077	0.209239	amac	urea	FALSE
355	24	A2	0.091	0.247283	amac	urea	FALSE
360	24	A2	0.108	0.293478	amac	urea	FALSE
365	24	A2	0.129	0.350543	amac	urea	FALSE
370	24	A2	0.151	0.410326	amac	urea	FALSE
375	24	A2	0.171	0.464674	amac	urea	FALSE
380	24	A2	0.185	0.502717	amac	urea	FALSE
385	24	A2	0.198	0.538043	amac	urea	FALSE
390	24	A2	0.206	0.559783	amac	urea	FALSE
395	24	A2	0.209	0.567935	amac	urea	FALSE
400	24	A2	0.202	0.548913	amac	urea	FALSE
405	24	A2	0.191	0.519022	amac	urea	FALSE
410	24	A2	0.174	0.472826	amac	urea	FALSE
415	24	A2	0.152	0.413043	amac	urea	FALSE
420	24	A2	0.129	0.350543	amac	urea	FALSE
425	24	A2	0.11	0.298913	amac	urea	FALSE
430	24	A2	0.091	0.247283	amac	urea	FALSE
435	24	A2	0.077	0.209239	amac	urea	FALSE
440	24	A2	0.07	0.190217	amac	urea	FALSE
445	24	A2	0.073	0.19837	amac	urea	FALSE
450	24	A2	0.081	0.220109	amac	urea	FALSE
455	24	A2	0.096	0.26087	amac	urea	FALSE
460	24	A2	0.115	0.3125	amac	urea	FALSE
465	24	A2	0.138	0.375	amac	urea	FALSE
470	24	A2	0.155	0.421196	amac	urea	FALSE
475	24	A2	0.166	0.451087	amac	urea	FALSE
480	24	A2	0.179	0.486413	amac	urea	FALSE
485	24	A2	0.2	0.543478	amac	urea	FALSE
490	24	A2	0.231	0.627717	amac	urea	FALSE
495	24	A2	0.256	0.695652	amac	urea	TRUE
500	24	A2	0.25	0.679348	amac	urea	FALSE
505	24	A2	0.2	0.543478	amac	urea	FALSE
510	24	A2	0.116	0.315217	amac	urea	FALSE
515	24	A2	0.051	0.138587	amac	urea	FALSE
520	24	A2	0.021	0.0570652	amac	urea	FALSE
525	24	A2	0.009	0.0244565	amac	urea	FALSE
530	24	A2	0.005	0.013587	amac	urea	FALSE
535	24	A2	0.003	0.00815217	amac	urea	FALSE
540	24	A2	0.003	0.00815217	amac	urea	FALSE
545	24	A2	0.003	0.00815217	amac	urea	FALSE
550	24	A2	0.002	0.00543478	amac	urea	FALSE
555	24	A2	0.003	0.00815217	amac	urea	FALSE
560	24	A2	0.002	0.00543478	amac	urea	FALSE
565	24	A2	0.002	0.00543478	amac	urea	FALSE
570	24	A2	0.002	0.00543478	amac	urea	FALSE
[truncated: 678,401+ more rows]

## Sheet: fluorescence_ex420nm
Wavelength	t	well	signal	signal_normalized	gene	treatment	peak
450	0	A2	128	0.00495452	amac	urea	FALSE
455	0	A2	38	0.00147087	amac	urea	FALSE
460	0	A2	82	0.00317399	amac	urea	FALSE
465	0	A2	180	0.00696729	amac	urea	FALSE
470	0	A2	95	0.00367718	amac	urea	FALSE
475	0	A2	299	0.0115734	amac	urea	FALSE
480	0	A2	692	0.0267854	amac	urea	FALSE
485	0	A2	1918	0.0742404	amac	urea	FALSE
490	0	A2	4840	0.187343	amac	urea	FALSE
495	0	A2	9065	0.350881	amac	urea	FALSE
500	0	A2	16173	0.626011	amac	urea	FALSE
505	0	A2	23101	0.894175	amac	urea	FALSE
510	0	A2	25835	1	amac	urea	TRUE
515	0	A2	24858	0.962183	amac	urea	FALSE
520	0	A2	21334	0.825779	amac	urea	FALSE
525	0	A2	16971	0.6569	amac	urea	FALSE
530	0	A2	12948	0.501181	amac	urea	FALSE
535	0	A2	11131	0.43085	amac	urea	FALSE
540	0	A2	10078	0.390091	amac	urea	FALSE
545	0	A2	9168	0.354867	amac	urea	FALSE
550	0	A2	8110	0.313915	amac	urea	FALSE
555	0	A2	6608	0.255777	amac	urea	FALSE
560	0	A2	5182	0.200581	amac	urea	FALSE
565	0	A2	4130	0.159861	amac	urea	FALSE
570	0	A2	3257	0.126069	amac	urea	FALSE
575	0	A2	2613	0.101142	amac	urea	FALSE
580	0	A2	2085	0.0807045	amac	urea	FALSE
585	0	A2	1745	0.067544	amac	urea	FALSE
590	0	A2	1535	0.0594155	amac	urea	FALSE
595	0	A2	1280	0.0495452	amac	urea	FALSE
600	0	A2	1031	0.0399071	amac	urea	FALSE
605	0	A2	806	0.031198	amac	urea	FALSE
610	0	A2	680	0.0263209	amac	urea	FALSE
615	0	A2	453	0.0175344	amac	urea	FALSE
620	0	A2	467	0.0180763	amac	urea	FALSE
625	0	A2	350	0.0135475	amac	urea	FALSE
630	0	A2	283	0.0109541	amac	urea	FALSE
635	0	A2	235	0.00909619	amac	urea	FALSE
640	0	A2	273	0.0105671	amac	urea	FALSE
645	0	A2	204	0.00789626	amac	urea	FALSE
650	0	A2	195	0.0075479	amac	urea	FALSE
655	0	A2	148	0.00572866	amac	urea	FALSE
660	0	A2	102	0.00394813	amac	urea	FALSE
665	0	A2	266	0.0102961	amac	urea	FALSE
670	0	A2	-36	-0.00139346	amac	urea	FALSE
675	0	A2	-159	-0.00615444	amac	urea	FALSE
680	0	A2	206	0.00797368	amac	urea	FALSE
685	0	A2	133	0.00514806	amac	urea	FALSE
690	0	A2	-190	-0.00735436	amac	urea	FALSE
695	0	A2	147	0.00568996	amac	urea	FALSE
700	0	A2	269	0.0104122	amac	urea	FALSE
450	1	A2	0	0	amac	urea	FALSE
455	1	A2	124	0.00479969	amac	urea	FALSE
460	1	A2	75	0.00290304	amac	urea	FALSE
465	1	A2	25	0.00096768	amac	urea	FALSE
470	1	A2	122	0.00472228	amac	urea	FALSE
475	1	A2	256	0.00990904	amac	urea	FALSE
480	1	A2	566	0.0219083	amac	urea	FALSE
485	1	A2	1531	0.0592607	amac	urea	FALSE
490	1	A2	3723	0.144107	amac	urea	FALSE
495	1	A2	7249	0.280588	amac	urea	FALSE
500	1	A2	12381	0.479234	amac	urea	FALSE
505	1	A2	18038	0.6982	amac	urea	FALSE
510	1	A2	20723	0.802129	amac	urea	TRUE
515	1	A2	19877	0.769383	amac	urea	FALSE
520	1	A2	16976	0.657093	amac	urea	FALSE
525	1	A2	14397	0.557267	amac	urea	FALSE
530	1	A2	10892	0.421599	amac	urea	FALSE
535	1	A2	9195	0.355913	amac	urea	FALSE
540	1	A2	8080	0.312754	amac	urea	FALSE
545	1	A2	7510	0.290691	amac	urea	FALSE
550	1	A2	6582	0.254771	amac	urea	FALSE
555	1	A2	5438	0.21049	amac	urea	FALSE
560	1	A2	4196	0.162415	amac	urea	FALSE
565	1	A2	3392	0.131295	amac	urea	FALSE
570	1	A2	2758	0.106754	amac	urea	FALSE
575	1	A2	2167	0.0838785	amac	urea	FALSE
580	1	A2	1805	0.0698665	amac	urea	FALSE
585	1	A2	1462	0.0565899	amac	urea	FALSE
590	1	A2	1213	0.0469518	amac	urea	FALSE
595	1	A2	1128	0.0436617	amac	urea	FALSE
600	1	A2	816	0.0315851	amac	urea	FALSE
605	1	A2	643	0.0248887	amac	urea	FALSE
610	1	A2	532	0.0205922	amac	urea	FALSE
615	1	A2	513	0.0198568	amac	urea	FALSE
620	1	A2	417	0.0161409	amac	urea	FALSE
625	1	A2	326	0.0126185	amac	urea	FALSE
630	1	A2	245	0.00948326	amac	urea	FALSE
635	1	A2	210	0.00812851	amac	urea	FALSE
640	1	A2	265	0.0102574	amac	urea	FALSE
645	1	A2	223	0.0086317	amac	urea	FALSE
650	1	A2	167	0.0064641	amac	urea	FALSE
655	1	A2	-33	-0.00127734	amac	urea	FALSE
660	1	A2	205	0.00793497	amac	urea	FALSE
665	1	A2	383	0.0148249	amac	urea	FALSE
670	1	A2	-204	-0.00789626	amac	urea	FALSE
675	1	A2	324	0.0125411	amac	urea	FALSE
680	1	A2	-591	-0.0228759	amac	urea	FALSE
685	1	A2	-187	-0.00723824	amac	urea	FALSE
690	1	A2	71	0.00274821	amac	urea	FALSE
695	1	A2	-138	-0.00534159	amac	urea	FALSE
700	1	A2	0	0	amac	urea	FALSE
450	2	A2	-6	-0.000232243	amac	urea	FALSE
455	2	A2	62	0.00239984	amac	urea	FALSE
460	2	A2	29	0.00112251	amac	urea	FALSE
465	2	A2	-66	-0.00255467	amac	urea	FALSE
470	2	A2	67	0.00259338	amac	urea	FALSE
475	2	A2	250	0.0096768	amac	urea	FALSE
480	2	A2	458	0.0177279	amac	urea	FALSE
485	2	A2	1173	0.0454035	amac	urea	FALSE
490	2	A2	3080	0.119218	amac	urea	FALSE
495	2	A2	5745	0.222373	amac	urea	FALSE
500	2	A2	10148	0.3928	amac	urea	FALSE
505	2	A2	14818	0.573563	amac	urea	FALSE
510	2	A2	17404	0.67366	amac	urea	TRUE
515	2	A2	16598	0.642462	amac	urea	FALSE
520	2	A2	14434	0.558699	amac	urea	FALSE
525	2	A2	12090	0.46797	amac	urea	FALSE
530	2	A2	8977	0.347474	amac	urea	FALSE
535	2	A2	7645	0.295916	amac	urea	FALSE
540	2	A2	6900	0.26708	amac	urea	FALSE
545	2	A2	6225	0.240952	amac	urea	FALSE
550	2	A2	5435	0.210374	amac	urea	FALSE
555	2	A2	4440	0.17186	amac	urea	FALSE
560	2	A2	3609	0.139694	amac	urea	FALSE
565	2	A2	2935	0.113606	amac	urea	FALSE
570	2	A2	2299	0.0889878	amac	urea	FALSE
575	2	A2	1923	0.0744339	amac	urea	FALSE
580	2	A2	1441	0.055777	amac	urea	FALSE
585	2	A2	1161	0.044939	amac	urea	FALSE
590	2	A2	1063	0.0411457	amac	urea	FALSE
595	2	A2	952	0.0368492	amac	urea	FALSE
600	2	A2	716	0.0277143	amac	urea	FALSE
605	2	A2	608	0.023534	amac	urea	FALSE
610	2	A2	450	0.0174182	amac	urea	FALSE
615	2	A2	474	0.0183472	amac	urea	FALSE
620	2	A2	338	0.013083	amac	urea	FALSE
625	2	A2	293	0.0113412	amac	urea	FALSE
630	2	A2	160	0.00619315	amac	urea	FALSE
635	2	A2	257	0.00994774	amac	urea	FALSE
640	2	A2	132	0.00510935	amac	urea	FALSE
645	2	A2	52	0.00201277	amac	urea	FALSE
650	2	A2	33	0.00127734	amac	urea	FALSE
655	2	A2	63	0.00243855	amac	urea	FALSE
660	2	A2	93	0.00359977	amac	urea	FALSE
665	2	A2	-67	-0.00259338	amac	urea	FALSE
670	2	A2	238	0.00921231	amac	urea	FALSE
675	2	A2	162	0.00627056	amac	urea	FALSE
680	2	A2	118	0.00456745	amac	urea	FALSE
685	2	A2	-32	-0.00123863	amac	urea	FALSE
690	2	A2	0	0	amac	urea	FALSE
695	2	A2	0	0	amac	urea	FALSE
700	2	A2	0	0	amac	urea	FALSE
450	3	A2	59	0.00228372	amac	urea	FALSE
455	3	A2	93	0.00359977	amac	urea	FALSE
460	3	A2	19	0.000735436	amac	urea	FALSE
465	3	A2	34	0.00131604	amac	urea	FALSE
470	3	A2	170	0.00658022	amac	urea	FALSE
475	3	A2	221	0.00855429	amac	urea	FALSE
480	3	A2	438	0.0169537	amac	urea	FALSE
485	3	A2	1176	0.0455196	amac	urea	FALSE
490	3	A2	2905	0.112444	amac	urea	FALSE
495	3	A2	5249	0.203174	amac	urea	FALSE
500	3	A2	9269	0.358777	amac	urea	FALSE
505	3	A2	12859	0.497736	amac	urea	FALSE
510	3	A2	15301	0.592259	amac	urea	TRUE
515	3	A2	14940	0.578285	amac	urea	FALSE
520	3	A2	13138	0.508535	amac	urea	FALSE
525	3	A2	10573	0.409251	amac	urea	FALSE
530	3	A2	8172	0.316315	amac	urea	FALSE
535	3	A2	7056	0.273118	amac	urea	FALSE
540	3	A2	6159	0.238398	amac	urea	FALSE
545	3	A2	5612	0.217225	amac	urea	FALSE
550	3	A2	4938	0.191136	amac	urea	FALSE
555	3	A2	4085	0.158119	amac	urea	FALSE
560	3	A2	3272	0.12665	amac	urea	FALSE
565	3	A2	2704	0.104664	amac	urea	FALSE
570	3	A2	2165	0.083801	amac	urea	FALSE
575	3	A2	1706	0.0660344	amac	urea	FALSE
580	3	A2	1362	0.0527192	amac	urea	FALSE
585	3	A2	1148	0.0444358	amac	urea	FALSE
590	3	A2	983	0.0380492	amac	urea	FALSE
595	3	A2	755	0.0292239	amac	urea	FALSE
600	3	A2	733	0.0283724	amac	urea	FALSE
605	3	A2	575	0.0222566	amac	urea	FALSE
610	3	A2	480	0.0185794	amac	urea	FALSE
615	3	A2	342	0.0132379	amac	urea	FALSE
620	3	A2	311	0.0120379	amac	urea	FALSE
625	3	A2	237	0.0091736	amac	urea	FALSE
630	3	A2	165	0.00638668	amac	urea	FALSE
635	3	A2	44	0.00170312	amac	urea	FALSE
640	3	A2	119	0.00460615	amac	urea	FALSE
645	3	A2	165	0.00638668	amac	urea	FALSE
650	3	A2	74	0.00286433	amac	urea	FALSE
655	3	A2	-8	-0.000309657	amac	urea	FALSE
660	3	A2	44	0.00170312	amac	urea	FALSE
665	3	A2	250	0.0096768	amac	urea	FALSE
670	3	A2	202	0.00781885	amac	urea	FALSE
675	3	A2	168	0.00650281	amac	urea	FALSE
680	3	A2	-289	-0.0111864	amac	urea	FALSE
685	3	A2	-68	-0.00263209	amac	urea	FALSE
690	3	A2	-56	-0.0021676	amac	urea	FALSE
695	3	A2	513	0.0198568	amac	urea	FALSE
700	3	A2	129	0.00499323	amac	urea	FALSE
450	4	A2	89	0.00344494	amac	urea	FALSE
455	4	A2	53	0.00205148	amac	urea	FALSE
460	4	A2	66	0.00255467	amac	urea	FALSE
465	4	A2	8	0.000309657	amac	urea	FALSE
470	4	A2	179	0.00692859	amac	urea	FALSE
475	4	A2	187	0.00723824	amac	urea	FALSE
480	4	A2	445	0.0172247	amac	urea	FALSE
485	4	A2	1076	0.0416489	amac	urea	FALSE
490	4	A2	2562	0.0991678	amac	urea	FALSE
495	4	A2	4809	0.186143	amac	urea	FALSE
500	4	A2	8142	0.315154	amac	urea	FALSE
505	4	A2	11659	0.451287	amac	urea	FALSE
510	4	A2	13773	0.533114	amac	urea	TRUE
515	4	A2	13584	0.525798	amac	urea	FALSE
520	4	A2	11718	0.453571	amac	urea	FALSE
525	4	A2	9592	0.371279	amac	urea	FALSE
530	4	A2	7328	0.283646	amac	urea	FALSE
535	4	A2	6167	0.238707	amac	urea	FALSE
540	4	A2	5578	0.215909	amac	urea	FALSE
545	4	A2	5129	0.198529	amac	urea	FALSE
550	4	A2	4406	0.170544	amac	urea	FALSE
555	4	A2	3690	0.142829	amac	urea	FALSE
560	4	A2	2833	0.109657	amac	urea	FALSE
565	4	A2	2427	0.0939423	amac	urea	FALSE
570	4	A2	1898	0.0734662	amac	urea	FALSE
575	4	A2	1572	0.0608477	amac	urea	FALSE
580	4	A2	1220	0.0472228	amac	urea	FALSE
585	4	A2	1064	0.0411844	amac	urea	FALSE
590	4	A2	942	0.0364622	amac	urea	FALSE
595	4	A2	700	0.027095	amac	urea	FALSE
600	4	A2	586	0.0226824	amac	urea	FALSE
605	4	A2	414	0.0160248	amac	urea	FALSE
610	4	A2	400	0.0154829	amac	urea	FALSE
615	4	A2	423	0.0163731	amac	urea	FALSE
620	4	A2	301	0.0116509	amac	urea	FALSE
625	4	A2	216	0.00836075	amac	urea	FALSE
630	4	A2	156	0.00603832	amac	urea	FALSE
635	4	A2	163	0.00630927	amac	urea	FALSE
640	4	A2	127	0.00491581	amac	urea	FALSE
645	4	A2	132	0.00510935	amac	urea	FALSE
650	4	A2	177	0.00685117	amac	urea	FALSE
655	4	A2	-35	-0.00135475	amac	urea	FALSE
660	4	A2	135	0.00522547	amac	urea	FALSE
665	4	A2	-142	-0.00549642	amac	urea	FALSE
670	4	A2	-31	-0.00119992	amac	urea	FALSE
675	4	A2	225	0.00870912	amac	urea	FALSE
680	4	A2	28	0.0010838	amac	urea	FALSE
685	4	A2	-43	-0.00166441	amac	urea	FALSE
690	4	A2	46	0.00178053	amac	urea	FALSE
695	4	A2	0	0	amac	urea	FALSE
700	4	A2	1205	0.0466422	amac	urea	FALSE
450	5	A2	19	0.000735436	amac	urea	FALSE
455	5	A2	32	0.00123863	amac	urea	FALSE
460	5	A2	114	0.00441262	amac	urea	FALSE
465	5	A2	90	0.00348365	amac	urea	FALSE
470	5	A2	10	0.000387072	amac	urea	FALSE
475	5	A2	164	0.00634798	amac	urea	FALSE
480	5	A2	338	0.013083	amac	urea	FALSE
485	5	A2	974	0.0377008	amac	urea	FALSE
490	5	A2	2245	0.0868976	amac	urea	FALSE
495	5	A2	4299	0.166402	amac	urea	FALSE
500	5	A2	7413	0.286936	amac	urea	FALSE
505	5	A2	10947	0.423728	amac	urea	FALSE
510	5	A2	12569	0.486511	amac	urea	TRUE
515	5	A2	12380	0.479195	amac	urea	FALSE
520	5	A2	10690	0.41378	amac	urea	FALSE
525	5	A2	8713	0.337256	amac	urea	FALSE
530	5	A2	6714	0.25988	amac	urea	FALSE
535	5	A2	5717	0.221289	amac	urea	FALSE
540	5	A2	5005	0.193729	amac	urea	FALSE
545	5	A2	4510	0.174569	amac	urea	FALSE
550	5	A2	4064	0.157306	amac	urea	FALSE
555	5	A2	3227	0.124908	amac	urea	FALSE
560	5	A2	2769	0.10718	amac	urea	FALSE
565	5	A2	2237	0.086588	amac	urea	FALSE
570	5	A2	1711	0.066228	amac	urea	FALSE
575	5	A2	1379	0.0533772	amac	urea	FALSE
580	5	A2	1034	0.0400232	amac	urea	FALSE
585	5	A2	985	0.0381266	amac	urea	FALSE
590	5	A2	791	0.0306174	amac	urea	FALSE
595	5	A2	611	0.0236501	amac	urea	FALSE
600	5	A2	510	0.0197407	amac	urea	FALSE
605	5	A2	364	0.0140894	amac	urea	FALSE
610	5	A2	425	0.0164506	amac	urea	FALSE
615	5	A2	265	0.0102574	amac	urea	FALSE
620	5	A2	252	0.00975421	amac	urea	FALSE
625	5	A2	299	0.0115734	amac	urea	FALSE
630	5	A2	121	0.00468357	amac	urea	FALSE
635	5	A2	206	0.00797368	amac	urea	FALSE
640	5	A2	12	0.000464486	amac	urea	FALSE
645	5	A2	13	0.000503193	amac	urea	FALSE
650	5	A2	83	0.0032127	amac	urea	FALSE
655	5	A2	101	0.00390943	amac	urea	FALSE
660	5	A2	-76	-0.00294175	amac	urea	FALSE
665	5	A2	-39	-0.00150958	amac	urea	FALSE
670	5	A2	146	0.00565125	amac	urea	FALSE
675	5	A2	-116	-0.00449003	amac	urea	FALSE
680	5	A2	109	0.00421908	amac	urea	FALSE
685	5	A2	-112	-0.0043352	amac	urea	FALSE
690	5	A2	27	0.00104509	amac	urea	FALSE
695	5	A2	-82	-0.00317399	amac	urea	FALSE
700	5	A2	-257	-0.00994774	amac	urea	FALSE
450	6	A2	174	0.00673505	amac	urea	FALSE
455	6	A2	96	0.00371589	amac	urea	FALSE
460	6	A2	-10	-0.000387072	amac	urea	FALSE
465	6	A2	85	0.00329011	amac	urea	FALSE
470	6	A2	51	0.00197407	amac	urea	FALSE
475	6	A2	119	0.00460615	amac	urea	FALSE
480	6	A2	336	0.0130056	amac	urea	FALSE
485	6	A2	841	0.0325527	amac	urea	FALSE
490	6	A2	2031	0.0786143	amac	urea	FALSE
495	6	A2	3882	0.150261	amac	urea	FALSE
500	6	A2	6673	0.258293	amac	urea	FALSE
505	6	A2	9388	0.363383	amac	urea	FALSE
510	6	A2	11483	0.444475	amac	urea	TRUE
515	6	A2	10796	0.417883	amac	urea	FALSE
520	6	A2	9585	0.371008	amac	urea	FALSE
525	6	A2	7778	0.301064	amac	urea	FALSE
530	6	A2	5971	0.231121	amac	urea	FALSE
535	6	A2	5000	0.193536	amac	urea	FALSE
540	6	A2	4381	0.169576	amac	urea	FALSE
545	6	A2	4009	0.155177	amac	urea	FALSE
550	6	A2	3657	0.141552	amac	urea	FALSE
555	6	A2	2969	0.114922	amac	urea	FALSE
560	6	A2	2327	0.0900716	amac	urea	FALSE
565	6	A2	1916	0.074163	amac	urea	FALSE
570	6	A2	1691	0.0654538	amac	urea	FALSE
575	6	A2	1204	0.0466034	amac	urea	FALSE
580	6	A2	948	0.0366944	amac	urea	FALSE
585	6	A2	761	0.0294562	amac	urea	FALSE
590	6	A2	641	0.0248113	amac	urea	FALSE
595	6	A2	637	0.0246565	amac	urea	FALSE
600	6	A2	510	0.0197407	amac	urea	FALSE
605	6	A2	399	0.0154442	amac	urea	FALSE
610	6	A2	328	0.012696	amac	urea	FALSE
615	6	A2	282	0.0109154	amac	urea	FALSE
620	6	A2	174	0.00673505	amac	urea	FALSE
625	6	A2	173	0.00669634	amac	urea	FALSE
630	6	A2	98	0.0037933	amac	urea	FALSE
635	6	A2	153	0.0059222	amac	urea	FALSE
640	6	A2	92	0.00356106	amac	urea	FALSE
645	6	A2	238	0.00921231	amac	urea	FALSE
650	6	A2	69	0.0026708	amac	urea	FALSE
655	6	A2	78	0.00301916	amac	urea	FALSE
660	6	A2	123	0.00476098	amac	urea	FALSE
665	6	A2	39	0.00150958	amac	urea	FALSE
670	6	A2	61	0.00236114	amac	urea	FALSE
675	6	A2	0	0	amac	urea	FALSE
680	6	A2	-94	-0.00363847	amac	urea	FALSE
685	6	A2	316	0.0122315	amac	urea	FALSE
690	6	A2	-369	-0.0142829	amac	urea	FALSE
695	6	A2	121	0.00468357	amac	urea	FALSE
700	6	A2	290	0.0112251	amac	urea	FALSE
450	7	A2	69	0.0026708	amac	urea	FALSE
455	7	A2	38	0.00147087	amac	urea	FALSE
460	7	A2	39	0.00150958	amac	urea	FALSE
465	7	A2	68	0.00263209	amac	urea	FALSE
470	7	A2	-30	-0.00116121	amac	urea	FALSE
475	7	A2	121	0.00468357	amac	urea	FALSE
480	7	A2	239	0.00925102	amac	urea	FALSE
485	7	A2	714	0.0276369	amac	urea	FALSE
490	7	A2	1975	0.0764467	amac	urea	FALSE
495	7	A2	3574	0.138339	amac	urea	FALSE
500	7	A2	6054	0.234333	amac	urea	FALSE
505	7	A2	8824	0.341552	amac	urea	FALSE
510	7	A2	10291	0.398336	amac	urea	TRUE
515	7	A2	9999	0.387033	amac	urea	FALSE
520	7	A2	8707	0.337023	amac	urea	FALSE
525	7	A2	6943	0.268744	amac	urea	FALSE
530	7	A2	5465	0.211535	amac	urea	FALSE
535	7	A2	4570	0.176892	amac	urea	FALSE
540	7	A2	4039	0.156338	amac	urea	FALSE
545	7	A2	3694	0.142984	amac	urea	FALSE
550	7	A2	3413	0.132108	amac	urea	FALSE
555	7	A2	2675	0.103542	amac	urea	FALSE
560	7	A2	2087	0.0807819	amac	urea	FALSE
565	7	A2	1767	0.0683956	amac	urea	FALSE
570	7	A2	1447	0.0560093	amac	urea	FALSE
575	7	A2	1088	0.0421134	amac	urea	FALSE
580	7	A2	916	0.0354558	amac	urea	FALSE
585	7	A2	736	0.0284885	amac	urea	FALSE
590	7	A2	580	0.0224502	amac	urea	FALSE
595	7	A2	566	0.0219083	amac	urea	FALSE
600	7	A2	433	0.0167602	amac	urea	FALSE
605	7	A2	413	0.0159861	amac	urea	FALSE
610	7	A2	351	0.0135862	amac	urea	FALSE
615	7	A2	250	0.0096768	amac	urea	FALSE
620	7	A2	128	0.00495452	amac	urea	FALSE
625	7	A2	179	0.00692859	amac	urea	FALSE
630	7	A2	111	0.0042965	amac	urea	FALSE
635	7	A2	57	0.00220631	amac	urea	FALSE
640	7	A2	121	0.00468357	amac	urea	FALSE
645	7	A2	164	0.00634798	amac	urea	FALSE
650	7	A2	269	0.0104122	amac	urea	FALSE
655	7	A2	97	0.0037546	amac	urea	FALSE
660	7	A2	28	0.0010838	amac	urea	FALSE
665	7	A2	132	0.00510935	amac	urea	FALSE
670	7	A2	215	0.00832204	amac	urea	FALSE
675	7	A2	-136	-0.00526418	amac	urea	FALSE
680	7	A2	64	0.00247726	amac	urea	FALSE
685	7	A2	-300	-0.0116122	amac	urea	FALSE
690	7	A2	249	0.00963809	amac	urea	FALSE
695	7	A2	-429	-0.0166054	amac	urea	FALSE
700	7	A2	59	0.00228372	amac	urea	FALSE
450	8	A2	121	0.00468357	amac	urea	FALSE
455	8	A2	72	0.00278692	amac	urea	FALSE
460	8	A2	85	0.00329011	amac	urea	FALSE
465	8	A2	131	0.00507064	amac	urea	FALSE
470	8	A2	203	0.00785756	amac	urea	FALSE
475	8	A2	182	0.00704471	amac	urea	FALSE
480	8	A2	356	0.0137798	amac	urea	FALSE
485	8	A2	716	0.0277143	amac	urea	FALSE
490	8	A2	1811	0.0700987	amac	urea	FALSE
495	8	A2	3344	0.129437	amac	urea	FALSE
500	8	A2	5568	0.215522	amac	urea	FALSE
505	8	A2	8038	0.311128	amac	urea	FALSE
510	8	A2	9587	0.371086	amac	urea	TRUE
515	8	A2	9277	0.359087	amac	urea	FALSE
520	8	A2	8039	0.311167	amac	urea	FALSE
525	8	A2	6599	0.255429	amac	urea	FALSE
530	8	A2	5145	0.199148	amac	urea	FALSE
535	8	A2	4246	0.164351	amac	urea	FALSE
540	8	A2	3862	0.149487	amac	urea	FALSE
545	8	A2	3422	0.132456	amac	urea	FALSE
550	8	A2	3105	0.120186	amac	urea	FALSE
555	8	A2	2525	0.0977356	amac	urea	FALSE
560	8	A2	2066	0.079969	amac	urea	FALSE
565	8	A2	1632	0.0631701	amac	urea	FALSE
570	8	A2	1335	0.0516741	amac	urea	FALSE
575	8	A2	1044	0.0404103	amac	urea	FALSE
580	8	A2	879	0.0340236	amac	urea	FALSE
585	8	A2	680	0.0263209	amac	urea	FALSE
590	8	A2	545	0.0210954	amac	urea	FALSE
595	8	A2	476	0.0184246	amac	urea	FALSE
600	8	A2	319	0.0123476	amac	urea	FALSE
605	8	A2	343	0.0132766	amac	urea	FALSE
610	8	A2	276	0.0106832	amac	urea	FALSE
615	8	A2	195	0.0075479	amac	urea	FALSE
620	8	A2	211	0.00816722	amac	urea	FALSE
625	8	A2	223	0.0086317	amac	urea	FALSE
630	8	A2	93	0.00359977	amac	urea	FALSE
635	8	A2	60	0.00232243	amac	urea	FALSE
640	8	A2	167	0.0064641	amac	urea	FALSE
645	8	A2	-2	-7.74e-05	amac	urea	FALSE
650	8	A2	9	0.000348365	amac	urea	FALSE
655	8	A2	-102	-0.00394813	amac	urea	FALSE
660	8	A2	5	0.000193536	amac	urea	FALSE
665	8	A2	-118	-0.00456745	amac	urea	FALSE
670	8	A2	-160	-0.00619315	amac	urea	FALSE
675	8	A2	339	0.0131217	amac	urea	FALSE
680	8	A2	241	0.00932843	amac	urea	FALSE
685	8	A2	111	0.0042965	amac	urea	FALSE
690	8	A2	410	0.0158699	amac	urea	FALSE
695	8	A2	68	0.00263209	amac	urea	FALSE
700	8	A2	364	0.0140894	amac	urea	FALSE
450	9	A2	65	0.00251597	amac	urea	FALSE
455	9	A2	104	0.00402555	amac	urea	FALSE
460	9	A2	40	0.00154829	amac	urea	FALSE
465	9	A2	49	0.00189665	amac	urea	FALSE
470	9	A2	71	0.00274821	amac	urea	FALSE
475	9	A2	153	0.0059222	amac	urea	FALSE
480	9	A2	256	0.00990904	amac	urea	FALSE
485	9	A2	740	0.0286433	amac	urea	FALSE
490	9	A2	1613	0.0624347	amac	urea	FALSE
495	9	A2	3036	0.117515	amac	urea	FALSE
500	9	A2	5076	0.196478	amac	urea	FALSE
505	9	A2	7509	0.290652	amac	urea	FALSE
510	9	A2	8810	0.34101	amac	urea	TRUE
515	9	A2	8337	0.322702	amac	urea	FALSE
520	9	A2	7240	0.28024	amac	urea	FALSE
525	9	A2	6218	0.240681	amac	urea	FALSE
530	9	A2	4651	0.180027	amac	urea	FALSE
535	9	A2	3870	0.149797	amac	urea	FALSE
540	9	A2	3495	0.135282	amac	urea	FALSE
545	9	A2	3049	0.118018	amac	urea	FALSE
550	9	A2	2760	0.106832	amac	urea	FALSE
555	9	A2	2244	0.0868589	amac	urea	FALSE
560	9	A2	1842	0.0712986	amac	urea	FALSE
565	9	A2	1468	0.0568221	amac	urea	FALSE
570	9	A2	1100	0.0425779	amac	urea	FALSE
575	9	A2	971	0.0375847	amac	urea	FALSE
580	9	A2	822	0.0318173	amac	urea	FALSE
585	9	A2	612	0.0236888	amac	urea	FALSE
590	9	A2	504	0.0195084	amac	urea	FALSE
595	9	A2	508	0.0196632	amac	urea	FALSE
600	9	A2	346	0.0133927	amac	urea	FALSE
605	9	A2	284	0.0109928	amac	urea	FALSE
610	9	A2	284	0.0109928	amac	urea	FALSE
615	9	A2	217	0.00839946	amac	urea	FALSE
620	9	A2	164	0.00634798	amac	urea	FALSE
625	9	A2	136	0.00526418	amac	urea	FALSE
630	9	A2	20	0.000774144	amac	urea	FALSE
635	9	A2	99	0.00383201	amac	urea	FALSE
640	9	A2	127	0.00491581	amac	urea	FALSE
645	9	A2	118	0.00456745	amac	urea	FALSE
650	9	A2	72	0.00278692	amac	urea	FALSE
655	9	A2	217	0.00839946	amac	urea	FALSE
660	9	A2	-66	-0.00255467	amac	urea	FALSE
665	9	A2	228	0.00882524	amac	urea	FALSE
670	9	A2	-142	-0.00549642	amac	urea	FALSE
675	9	A2	-130	-0.00503193	amac	urea	FALSE
680	9	A2	5	0.000193536	amac	urea	FALSE
685	9	A2	67	0.00259338	amac	urea	FALSE
690	9	A2	-501	-0.0193923	amac	urea	FALSE
695	9	A2	498	0.0192762	amac	urea	FALSE
700	9	A2	560	0.021676	amac	urea	FALSE
450	10	A2	-2	-7.74e-05	amac	urea	FALSE
455	10	A2	60	0.00232243	amac	urea	FALSE
460	10	A2	15	0.000580608	amac	urea	FALSE
465	10	A2	10	0.000387072	amac	urea	FALSE
470	10	A2	78	0.00301916	amac	urea	FALSE
475	10	A2	115	0.00445133	amac	urea	FALSE
480	10	A2	262	0.0101413	amac	urea	FALSE
485	10	A2	563	0.0217921	amac	urea	FALSE
490	10	A2	1462	0.0565899	amac	urea	FALSE
495	10	A2	2836	0.109774	amac	urea	FALSE
500	10	A2	4836	0.187188	amac	urea	FALSE
505	10	A2	6738	0.260809	amac	urea	FALSE
510	10	A2	7950	0.307722	amac	urea	TRUE
515	10	A2	7768	0.300677	amac	urea	FALSE
520	10	A2	6810	0.263596	amac	urea	FALSE
525	10	A2	5753	0.222682	amac	urea	FALSE
530	10	A2	4402	0.170389	amac	urea	FALSE
535	10	A2	3730	0.144378	amac	urea	FALSE
540	10	A2	3215	0.124444	amac	urea	FALSE
545	10	A2	2927	0.113296	amac	urea	FALSE
550	10	A2	2630	0.1018	amac	urea	FALSE
555	10	A2	2128	0.0823689	amac	urea	FALSE
560	10	A2	1734	0.0671183	amac	urea	FALSE
565	10	A2	1472	0.056977	amac	urea	FALSE
570	10	A2	1147	0.0443971	amac	urea	FALSE
575	10	A2	842	0.0325914	amac	urea	FALSE
580	10	A2	638	0.0246952	amac	urea	FALSE
585	10	A2	576	0.0222953	amac	urea	FALSE
590	10	A2	512	0.0198181	amac	urea	FALSE
595	10	A2	474	0.0183472	amac	urea	FALSE
600	10	A2	352	0.0136249	amac	urea	FALSE
605	10	A2	255	0.00987033	amac	urea	FALSE
610	10	A2	176	0.00681246	amac	urea	FALSE
615	10	A2	157	0.00607703	amac	urea	FALSE
620	10	A2	192	0.00743178	amac	urea	FALSE
625	10	A2	191	0.00739307	amac	urea	FALSE
630	10	A2	113	0.00437391	amac	urea	FALSE
635	10	A2	199	0.00770273	amac	urea	FALSE
640	10	A2	125	0.0048384	amac	urea	FALSE
645	10	A2	205	0.00793497	amac	urea	FALSE
650	10	A2	56	0.0021676	amac	urea	FALSE
655	10	A2	38	0.00147087	amac	urea	FALSE
660	10	A2	-29	-0.00112251	amac	urea	FALSE
665	10	A2	-59	-0.00228372	amac	urea	FALSE
670	10	A2	197	0.00762531	amac	urea	FALSE
675	10	A2	198	0.00766402	amac	urea	FALSE
680	10	A2	-410	-0.0158699	amac	urea	FALSE
685	10	A2	-150	-0.00580608	amac	urea	FALSE
690	10	A2	-503	-0.0194697	amac	urea	FALSE
695	10	A2	-403	-0.015599	amac	urea	FALSE
700	10	A2	-6	-0.000232243	amac	urea	FALSE
450	11	A2	42	0.0016257	amac	urea	FALSE
455	11	A2	80	0.00309657	amac	urea	FALSE
460	11	A2	1	3.87e-05	amac	urea	FALSE
465	11	A2	72	0.00278692	amac	urea	FALSE
470	11	A2	102	0.00394813	amac	urea	FALSE
475	11	A2	146	0.00565125	amac	urea	FALSE
480	11	A2	213	0.00824463	amac	urea	FALSE
485	11	A2	593	0.0229534	amac	urea	FALSE
490	11	A2	1312	0.0507838	amac	urea	FALSE
495	11	A2	2596	0.100484	amac	urea	FALSE
500	11	A2	4308	0.166751	amac	urea	FALSE
505	11	A2	6326	0.244862	amac	urea	FALSE
510	11	A2	7381	0.285698	amac	urea	TRUE
515	11	A2	7243	0.280356	amac	urea	FALSE
520	11	A2	6244	0.241688	amac	urea	FALSE
525	11	A2	5196	0.201123	amac	urea	FALSE
530	11	A2	3944	0.152661	amac	urea	FALSE
535	11	A2	3467	0.134198	amac	urea	FALSE
540	11	A2	3012	0.116586	amac	urea	FALSE
545	11	A2	2663	0.103077	amac	urea	FALSE
550	11	A2	2303	0.0891426	amac	urea	FALSE
555	11	A2	1994	0.0771821	amac	urea	FALSE
560	11	A2	1581	0.0611961	amac	urea	FALSE
565	11	A2	1211	0.0468744	amac	urea	FALSE
570	11	A2	1054	0.0407974	amac	urea	FALSE
575	11	A2	788	0.0305013	amac	urea	FALSE
580	11	A2	654	0.0253145	amac	urea	FALSE
585	11	A2	523	0.0202439	amac	urea	FALSE
590	11	A2	405	0.0156764	amac	urea	FALSE
595	11	A2	390	0.0150958	amac	urea	FALSE
600	11	A2	292	0.0113025	amac	urea	FALSE
605	11	A2	327	0.0126572	amac	urea	FALSE
610	11	A2	152	0.00588349	amac	urea	FALSE
615	11	A2	65	0.00251597	amac	urea	FALSE
620	11	A2	182	0.00704471	amac	urea	FALSE
625	11	A2	90	0.00348365	amac	urea	FALSE
630	11	A2	16	0.000619315	amac	urea	FALSE
635	11	A2	212	0.00820592	amac	urea	FALSE
640	11	A2	52	0.00201277	amac	urea	FALSE
645	11	A2	47	0.00181924	amac	urea	FALSE
650	11	A2	32	0.00123863	amac	urea	FALSE
655	11	A2	157	0.00607703	amac	urea	FALSE
660	11	A2	206	0.00797368	amac	urea	FALSE
665	11	A2	-41	-0.00158699	amac	urea	FALSE
670	11	A2	136	0.00526418	amac	urea	FALSE
675	11	A2	-374	-0.0144765	amac	urea	FALSE
680	11	A2	-477	-0.0184633	amac	urea	FALSE
685	11	A2	126	0.0048771	amac	urea	FALSE
690	11	A2	-845	-0.0327076	amac	urea	FALSE
695	11	A2	-195	-0.0075479	amac	urea	FALSE
700	11	A2	-204	-0.00789626	amac	urea	FALSE
450	12	A2	66	0.00255467	amac	urea	FALSE
455	12	A2	65	0.00251597	amac	urea	FALSE
460	12	A2	119	0.00460615	amac	urea	FALSE
465	12	A2	88	0.00340623	amac	urea	FALSE
470	12	A2	62	0.00239984	amac	urea	FALSE
475	12	A2	148	0.00572866	amac	urea	FALSE
480	12	A2	253	0.00979292	amac	urea	FALSE
485	12	A2	518	0.0200503	amac	urea	FALSE
490	12	A2	1373	0.053145	amac	urea	FALSE
495	12	A2	2551	0.098742	amac	urea	FALSE
500	12	A2	4173	0.161525	amac	urea	FALSE
505	12	A2	6093	0.235843	amac	urea	FALSE
510	12	A2	6941	0.268667	amac	urea	TRUE
515	12	A2	6952	0.269092	amac	urea	FALSE
520	12	A2	5873	0.227327	amac	urea	FALSE
525	12	A2	4925	0.190633	amac	urea	FALSE
530	12	A2	3864	0.149565	amac	urea	FALSE
535	12	A2	3205	0.124057	amac	urea	FALSE
540	12	A2	2829	0.109503	amac	urea	FALSE
545	12	A2	2550	0.0987033	amac	urea	FALSE
550	12	A2	2225	0.0861235	amac	urea	FALSE
555	12	A2	1785	0.0690923	amac	urea	FALSE
560	12	A2	1521	0.0588736	amac	urea	FALSE
565	12	A2	1251	0.0484227	amac	urea	FALSE
570	12	A2	960	0.0371589	amac	urea	FALSE
575	12	A2	805	0.0311593	amac	urea	FALSE
580	12	A2	632	0.0244629	amac	urea	FALSE
585	12	A2	498	0.0192762	amac	urea	FALSE
590	12	A2	470	0.0181924	amac	urea	FALSE
595	12	A2	398	0.0154055	amac	urea	FALSE
600	12	A2	305	0.0118057	amac	urea	FALSE
605	12	A2	280	0.010838	amac	urea	FALSE
610	12	A2	191	0.00739307	amac	urea	FALSE
615	12	A2	158	0.00611573	amac	urea	FALSE
620	12	A2	126	0.0048771	amac	urea	FALSE
625	12	A2	118	0.00456745	amac	urea	FALSE
630	12	A2	40	0.00154829	amac	urea	FALSE
635	12	A2	24	0.000928972	amac	urea	FALSE
640	12	A2	95	0.00367718	amac	urea	FALSE
645	12	A2	-62	-0.00239984	amac	urea	FALSE
650	12	A2	88	0.00340623	amac	urea	FALSE
655	12	A2	-8	-0.000309657	amac	urea	FALSE
660	12	A2	-133	-0.00514806	amac	urea	FALSE
665	12	A2	-94	-0.00363847	amac	urea	FALSE
670	12	A2	77	0.00298045	amac	urea	FALSE
675	12	A2	-2	-7.74e-05	amac	urea	FALSE
680	12	A2	62	0.00239984	amac	urea	FALSE
685	12	A2	-381	-0.0147474	amac	urea	FALSE
690	12	A2	3	0.000116122	amac	urea	FALSE
695	12	A2	-547	-0.0211728	amac	urea	FALSE
700	12	A2	-14	-0.000541901	amac	urea	FALSE
450	13	A2	16	0.000619315	amac	urea	FALSE
455	13	A2	-13	-0.000503193	amac	urea	FALSE
460	13	A2	-23	-0.000890265	amac	urea	FALSE
465	13	A2	28	0.0010838	amac	urea	FALSE
470	13	A2	-51	-0.00197407	amac	urea	FALSE
475	13	A2	51	0.00197407	amac	urea	FALSE
480	13	A2	163	0.00630927	amac	urea	FALSE
485	13	A2	425	0.0164506	amac	urea	FALSE
490	13	A2	1159	0.0448616	amac	urea	FALSE
495	13	A2	2212	0.0856203	amac	urea	FALSE
500	13	A2	3757	0.145423	amac	urea	FALSE
505	13	A2	5561	0.215251	amac	urea	FALSE
510	13	A2	6411	0.248152	amac	urea	TRUE
515	13	A2	6248	0.241842	amac	urea	FALSE
520	13	A2	5461	0.21138	amac	urea	FALSE
525	13	A2	4500	0.174182	amac	urea	FALSE
530	13	A2	3524	0.136404	amac	urea	FALSE
535	13	A2	2966	0.114805	amac	urea	FALSE
540	13	A2	2484	0.0961486	amac	urea	FALSE
545	13	A2	2269	0.0878266	amac	urea	FALSE
550	13	A2	1957	0.07575	amac	urea	FALSE
555	13	A2	1677	0.0649119	amac	urea	FALSE
560	13	A2	1305	0.0505129	amac	urea	FALSE
565	13	A2	1087	0.0420747	amac	urea	FALSE
570	13	A2	921	0.0356493	amac	urea	FALSE
575	13	A2	681	0.0263596	amac	urea	FALSE
580	13	A2	599	0.0231856	amac	urea	FALSE
585	13	A2	523	0.0202439	amac	urea	FALSE
590	13	A2	469	0.0181537	amac	urea	FALSE
595	13	A2	341	0.0131991	amac	urea	FALSE
600	13	A2	322	0.0124637	amac	urea	FALSE
605	13	A2	183	0.00708341	amac	urea	FALSE
610	13	A2	170	0.00658022	amac	urea	FALSE
615	13	A2	111	0.0042965	amac	urea	FALSE
620	13	A2	72	0.00278692	amac	urea	FALSE
625	13	A2	119	0.00460615	amac	urea	FALSE
630	13	A2	128	0.00495452	amac	urea	FALSE
635	13	A2	-2	-7.74e-05	amac	urea	FALSE
640	13	A2	-5	-0.000193536	amac	urea	FALSE
645	13	A2	155	0.00599961	amac	urea	FALSE
650	13	A2	-40	-0.00154829	amac	urea	FALSE
655	13	A2	126	0.0048771	amac	urea	FALSE
660	13	A2	-22	-0.000851558	amac	urea	FALSE
665	13	A2	101	0.00390943	amac	urea	FALSE
670	13	A2	0	0	amac	urea	FALSE
675	13	A2	-93	-0.00359977	amac	urea	FALSE
680	13	A2	-52	-0.00201277	amac	urea	FALSE
685	13	A2	554	0.0214438	amac	urea	FALSE
690	13	A2	898	0.034759	amac	urea	FALSE
695	13	A2	-32	-0.00123863	amac	urea	FALSE
700	13	A2	-300	-0.0116122	amac	urea	FALSE
450	14	A2	64	0.00247726	amac	urea	FALSE
455	14	A2	-1	-3.87e-05	amac	urea	FALSE
460	14	A2	53	0.00205148	amac	urea	FALSE
465	14	A2	88	0.00340623	amac	urea	FALSE
470	14	A2	24	0.000928972	amac	urea	FALSE
475	14	A2	113	0.00437391	amac	urea	FALSE
480	14	A2	244	0.00944455	amac	urea	FALSE
485	14	A2	520	0.0201277	amac	urea	FALSE
490	14	A2	1105	0.0427714	amac	urea	FALSE
495	14	A2	2062	0.0798142	amac	urea	FALSE
500	14	A2	3532	0.136714	amac	urea	FALSE
505	14	A2	5064	0.196013	amac	urea	FALSE
510	14	A2	5920	0.229147	amac	urea	TRUE
515	14	A2	5747	0.22245	amac	urea	FALSE
520	14	A2	5137	0.198839	amac	urea	FALSE
525	14	A2	4125	0.159667	amac	urea	FALSE
530	14	A2	3202	0.12394	amac	urea	FALSE
535	14	A2	2683	0.103851	amac	urea	FALSE
540	14	A2	2333	0.0903039	amac	urea	FALSE
545	14	A2	2180	0.0843817	amac	urea	FALSE
550	14	A2	1894	0.0733114	amac	urea	FALSE
555	14	A2	1636	0.0633249	amac	urea	FALSE
560	14	A2	1210	0.0468357	amac	urea	FALSE
565	14	A2	1051	0.0406812	amac	urea	FALSE
570	14	A2	850	0.0329011	amac	urea	FALSE
575	14	A2	686	0.0265531	amac	urea	FALSE
580	14	A2	463	0.0179214	amac	urea	FALSE
585	14	A2	379	0.01467	amac	urea	FALSE
590	14	A2	393	0.0152119	amac	urea	FALSE
595	14	A2	324	0.0125411	amac	urea	FALSE
600	14	A2	297	0.011496	amac	urea	FALSE
605	14	A2	219	0.00847687	amac	urea	FALSE
610	14	A2	60	0.00232243	amac	urea	FALSE
615	14	A2	200	0.00774144	amac	urea	FALSE
620	14	A2	170	0.00658022	amac	urea	FALSE
625	14	A2	75	0.00290304	amac	urea	FALSE
630	14	A2	51	0.00197407	amac	urea	FALSE
635	14	A2	118	0.00456745	amac	urea	FALSE
640	14	A2	26	0.00100639	amac	urea	FALSE
645	14	A2	69	0.0026708	amac	urea	FALSE
650	14	A2	-41	-0.00158699	amac	urea	FALSE
655	14	A2	190	0.00735436	amac	urea	FALSE
660	14	A2	-149	-0.00576737	amac	urea	FALSE
665	14	A2	49	0.00189665	amac	urea	FALSE
670	14	A2	-105	-0.00406425	amac	urea	FALSE
675	14	A2	183	0.00708341	amac	urea	FALSE
680	14	A2	-309	-0.0119605	amac	urea	FALSE
685	14	A2	265	0.0102574	amac	urea	FALSE
690	14	A2	242	0.00936714	amac	urea	FALSE
695	14	A2	559	0.0216373	amac	urea	FALSE
700	14	A2	69	0.0026708	amac	urea	FALSE
450	15	A2	55	0.0021289	amac	urea	FALSE
455	15	A2	40	0.00154829	amac	urea	FALSE
460	15	A2	44	0.00170312	amac	urea	FALSE
465	15	A2	73	0.00282562	amac	urea	FALSE
470	15	A2	79	0.00305787	amac	urea	FALSE
475	15	A2	88	0.00340623	amac	urea	FALSE
480	15	A2	158	0.00611573	amac	urea	FALSE
485	15	A2	457	0.0176892	amac	urea	FALSE
490	15	A2	1139	0.0440875	amac	urea	FALSE
495	15	A2	1986	0.0768725	amac	urea	FALSE
500	15	A2	3331	0.128934	amac	urea	FALSE
505	15	A2	4888	0.189201	amac	urea	FALSE
510	15	A2	5700	0.220631	amac	urea	TRUE
515	15	A2	5501	0.212928	amac	urea	FALSE
520	15	A2	4781	0.185059	amac	urea	FALSE
525	15	A2	3942	0.152584	amac	urea	FALSE
530	15	A2	3030	0.117283	amac	urea	FALSE
535	15	A2	2583	0.0999806	amac	urea	FALSE
540	15	A2	2219	0.0858912	amac	urea	FALSE
545	15	A2	2120	0.0820592	amac	urea	FALSE
550	15	A2	1839	0.0711825	amac	urea	FALSE
555	15	A2	1457	0.0563964	amac	urea	FALSE
560	15	A2	1150	0.0445133	amac	urea	FALSE
565	15	A2	996	0.0385524	amac	urea	FALSE
570	15	A2	871	0.033714	amac	urea	FALSE
575	15	A2	599	0.0231856	amac	urea	FALSE
580	15	A2	503	0.0194697	amac	urea	FALSE
585	15	A2	389	0.0150571	amac	urea	FALSE
590	15	A2	342	0.0132379	amac	urea	FALSE
595	15	A2	324	0.0125411	amac	urea	FALSE
600	15	A2	232	0.00898007	amac	urea	FALSE
605	15	A2	220	0.00851558	amac	urea	FALSE
610	15	A2	149	0.00576737	amac	urea	FALSE
615	15	A2	28	0.0010838	amac	urea	FALSE
620	15	A2	162	0.00627056	amac	urea	FALSE
625	15	A2	79	0.00305787	amac	urea	FALSE
630	15	A2	142	0.00549642	amac	urea	FALSE
635	15	A2	103	0.00398684	amac	urea	FALSE
640	15	A2	159	0.00615444	amac	urea	FALSE
645	15	A2	-64	-0.00247726	amac	urea	FALSE
650	15	A2	-34	-0.00131604	amac	urea	FALSE
655	15	A2	-170	-0.00658022	amac	urea	FALSE
660	15	A2	81	0.00313528	amac	urea	FALSE
665	15	A2	83	0.0032127	amac	urea	FALSE
670	15	A2	143	0.00553513	amac	urea	FALSE
675	15	A2	24	0.000928972	amac	urea	FALSE
680	15	A2	202	0.00781885	amac	urea	FALSE
685	15	A2	157	0.00607703	amac	urea	FALSE
690	15	A2	782	0.030269	amac	urea	FALSE
695	15	A2	0	0	amac	urea	FALSE
700	15	A2	527	0.0203987	amac	urea	FALSE
450	16	A2	-12	-0.000464486	amac	urea	FALSE
455	16	A2	56	0.0021676	amac	urea	FALSE
460	16	A2	59	0.00228372	amac	urea	FALSE
465	16	A2	36	0.00139346	amac	urea	FALSE
470	16	A2	86	0.00332882	amac	urea	FALSE
475	16	A2	64	0.00247726	amac	urea	FALSE
480	16	A2	130	0.00503193	amac	urea	FALSE
485	16	A2	414	0.0160248	amac	urea	FALSE
490	16	A2	923	0.0357267	amac	urea	FALSE
495	16	A2	1845	0.0714147	amac	urea	FALSE
500	16	A2	3150	0.121928	amac	urea	FALSE
505	16	A2	4564	0.17666	amac	urea	FALSE
510	16	A2	5250	0.203213	amac	urea	TRUE
515	16	A2	5086	0.196865	amac	urea	FALSE
520	16	A2	4446	0.172092	amac	urea	FALSE
525	16	A2	3735	0.144571	amac	urea	FALSE
530	16	A2	2816	0.108999	amac	urea	FALSE
535	16	A2	2392	0.0925876	amac	urea	FALSE
540	16	A2	2164	0.0837623	amac	urea	FALSE
545	16	A2	1985	0.0768338	amac	urea	FALSE
550	16	A2	1659	0.0642152	amac	urea	FALSE
555	16	A2	1409	0.0545384	amac	urea	FALSE
560	16	A2	1182	0.0457519	amac	urea	FALSE
565	16	A2	941	0.0364235	amac	urea	FALSE
570	16	A2	755	0.0292239	amac	urea	FALSE
575	16	A2	560	0.021676	amac	urea	FALSE
580	16	A2	475	0.0183859	amac	urea	FALSE
585	16	A2	406	0.0157151	amac	urea	FALSE
590	16	A2	322	0.0124637	amac	urea	FALSE
595	16	A2	207	0.00801239	amac	urea	FALSE
600	16	A2	178	0.00688988	amac	urea	FALSE
605	16	A2	172	0.00665764	amac	urea	FALSE
610	16	A2	169	0.00654151	amac	urea	FALSE
615	16	A2	131	0.00507064	amac	urea	FALSE
620	16	A2	201	0.00778014	amac	urea	FALSE
625	16	A2	145	0.00561254	amac	urea	FALSE
630	16	A2	-1	-3.87e-05	amac	urea	FALSE
635	16	A2	69	0.0026708	amac	urea	FALSE
640	16	A2	115	0.00445133	amac	urea	FALSE
645	16	A2	-79	-0.00305787	amac	urea	FALSE
650	16	A2	-141	-0.00545771	amac	urea	FALSE
655	16	A2	-111	-0.0042965	amac	urea	FALSE
660	16	A2	8	0.000309657	amac	urea	FALSE
665	16	A2	246	0.00952197	amac	urea	FALSE
670	16	A2	271	0.0104896	amac	urea	FALSE
675	16	A2	-300	-0.0116122	amac	urea	FALSE
680	16	A2	-109	-0.00421908	amac	urea	FALSE
685	16	A2	20	0.000774144	amac	urea	FALSE
690	16	A2	56	0.0021676	amac	urea	FALSE
695	16	A2	176	0.00681246	amac	urea	FALSE
700	16	A2	129	0.00499323	amac	urea	FALSE
450	17	A2	72	0.00278692	amac	urea	FALSE
455	17	A2	52	0.00201277	amac	urea	FALSE
460	17	A2	9	0.000348365	amac	urea	FALSE
465	17	A2	11	0.000425779	amac	urea	FALSE
470	17	A2	12	0.000464486	amac	urea	FALSE
475	17	A2	120	0.00464486	amac	urea	FALSE
480	17	A2	126	0.0048771	amac	urea	FALSE
485	17	A2	369	0.0142829	amac	urea	FALSE
490	17	A2	862	0.0333656	amac	urea	FALSE
495	17	A2	1705	0.0659957	amac	urea	FALSE
500	17	A2	2883	0.111593	amac	urea	FALSE
505	17	A2	4213	0.163073	amac	urea	FALSE
510	17	A2	4860	0.188117	amac	urea	TRUE
515	17	A2	4811	0.18622	amac	urea	FALSE
520	17	A2	4338	0.167912	amac	urea	FALSE
525	17	A2	3419	0.13234	amac	urea	FALSE
530	17	A2	2662	0.103039	amac	urea	FALSE
535	17	A2	2184	0.0845365	amac	urea	FALSE
540	17	A2	1949	0.0754403	amac	urea	FALSE
545	17	A2	1808	0.0699826	amac	urea	FALSE
550	17	A2	1596	0.0617767	amac	urea	FALSE
555	17	A2	1292	0.0500097	amac	urea	FALSE
560	17	A2	1008	0.0390168	amac	urea	FALSE
565	17	A2	839	0.0324753	amac	urea	FALSE
570	17	A2	615	0.0238049	amac	urea	FALSE
575	17	A2	593	0.0229534	amac	urea	FALSE
580	17	A2	515	0.0199342	amac	urea	FALSE
585	17	A2	384	0.0148636	amac	urea	FALSE
590	17	A2	199	0.00770273	amac	urea	FALSE
595	17	A2	262	0.0101413	amac	urea	FALSE
600	17	A2	209	0.0080898	amac	urea	FALSE
605	17	A2	149	0.00576737	amac	urea	FALSE
610	17	A2	141	0.00545771	amac	urea	FALSE
615	17	A2	131	0.00507064	amac	urea	FALSE
620	17	A2	194	0.00750919	amac	urea	FALSE
625	17	A2	46	0.00178053	amac	urea	FALSE
630	17	A2	150	0.00580608	amac	urea	FALSE
635	17	A2	19	0.000735436	amac	urea	FALSE
640	17	A2	-12	-0.000464486	amac	urea	FALSE
645	17	A2	-76	-0.00294175	amac	urea	FALSE
650	17	A2	15	0.000580608	amac	urea	FALSE
655	17	A2	175	0.00677376	amac	urea	FALSE
660	17	A2	-21	-0.000812851	amac	urea	FALSE
665	17	A2	-190	-0.00735436	amac	urea	FALSE
670	17	A2	-41	-0.00158699	amac	urea	FALSE
675	17	A2	277	0.0107219	amac	urea	FALSE
680	17	A2	0	0	amac	urea	FALSE
685	17	A2	482	0.0186569	amac	urea	FALSE
690	17	A2	-94	-0.00363847	amac	urea	FALSE
695	17	A2	290	0.0112251	amac	urea	FALSE
700	17	A2	-17	-0.000658022	amac	urea	FALSE
450	18	A2	85	0.00329011	amac	urea	FALSE
455	18	A2	3	0.000116122	amac	urea	FALSE
460	18	A2	76	0.00294175	amac	urea	FALSE
465	18	A2	96	0.00371589	amac	urea	FALSE
470	18	A2	96	0.00371589	amac	urea	FALSE
475	18	A2	167	0.0064641	amac	urea	FALSE
480	18	A2	144	0.00557383	amac	urea	FALSE
485	18	A2	441	0.0170699	amac	urea	FALSE
490	18	A2	909	0.0351848	amac	urea	FALSE
495	18	A2	1732	0.0670408	amac	urea	FALSE
500	18	A2	2830	0.109541	amac	urea	FALSE
505	18	A2	4025	0.155796	amac	urea	FALSE
510	18	A2	4667	0.180646	amac	urea	TRUE
515	18	A2	4673	0.180879	amac	urea	FALSE
520	18	A2	3931	0.152158	amac	urea	FALSE
525	18	A2	3387	0.131101	amac	urea	FALSE
530	18	A2	2503	0.0968841	amac	urea	FALSE
535	18	A2	2245	0.0868976	amac	urea	FALSE
540	18	A2	1953	0.0755951	amac	urea	FALSE
545	18	A2	1703	0.0659183	amac	urea	FALSE
550	18	A2	1536	0.0594542	amac	urea	FALSE
555	18	A2	1256	0.0486162	amac	urea	FALSE
560	18	A2	998	0.0386298	amac	urea	FALSE
565	18	A2	815	0.0315464	amac	urea	FALSE
570	18	A2	696	0.0269402	amac	urea	FALSE
575	18	A2	491	0.0190052	amac	urea	FALSE
580	18	A2	450	0.0174182	amac	urea	FALSE
585	18	A2	373	0.0144378	amac	urea	FALSE
590	18	A2	407	0.0157538	amac	urea	FALSE
595	18	A2	232	0.00898007	amac	urea	FALSE
600	18	A2	206	0.00797368	amac	urea	FALSE
605	18	A2	218	0.00843816	amac	urea	FALSE
610	18	A2	197	0.00762531	amac	urea	FALSE
615	18	A2	111	0.0042965	amac	urea	FALSE
620	18	A2	91	0.00352235	amac	urea	FALSE
625	18	A2	-66	-0.00255467	amac	urea	FALSE
630	18	A2	46	0.00178053	amac	urea	FALSE
635	18	A2	95	0.00367718	amac	urea	FALSE
640	18	A2	-15	-0.000580608	amac	urea	FALSE
645	18	A2	-26	-0.00100639	amac	urea	FALSE
650	18	A2	5	0.000193536	amac	urea	FALSE
655	18	A2	49	0.00189665	amac	urea	FALSE
660	18	A2	136	0.00526418	amac	urea	FALSE
665	18	A2	227	0.00878653	amac	urea	FALSE
670	18	A2	-126	-0.0048771	amac	urea	FALSE
675	18	A2	359	0.0138959	amac	urea	FALSE
680	18	A2	36	0.00139346	amac	urea	FALSE
685	18	A2	220	0.00851558	amac	urea	FALSE
690	18	A2	70	0.0027095	amac	urea	FALSE
695	18	A2	-940	-0.0363847	amac	urea	FALSE
700	18	A2	186	0.00719954	amac	urea	FALSE
450	19	A2	51	0.00197407	amac	urea	FALSE
455	19	A2	-3	-0.000116122	amac	urea	FALSE
460	19	A2	29	0.00112251	amac	urea	FALSE
465	19	A2	-5	-0.000193536	amac	urea	FALSE
470	19	A2	31	0.00119992	amac	urea	FALSE
475	19	A2	47	0.00181924	amac	urea	FALSE
480	19	A2	57	0.00220631	amac	urea	FALSE
485	19	A2	307	0.0118831	amac	urea	FALSE
490	19	A2	758	0.02934	amac	urea	FALSE
495	19	A2	1501	0.0580995	amac	urea	FALSE
500	19	A2	2602	0.100716	amac	urea	FALSE
505	19	A2	3602	0.139423	amac	urea	FALSE
510	19	A2	4314	0.166983	amac	urea	TRUE
515	19	A2	4084	0.15808	amac	urea	FALSE
520	19	A2	3497	0.135359	amac	urea	FALSE
525	19	A2	2966	0.114805	amac	urea	FALSE
530	19	A2	2336	0.09042	amac	urea	FALSE
535	19	A2	1934	0.0748597	amac	urea	FALSE
540	19	A2	1634	0.0632475	amac	urea	FALSE
545	19	A2	1595	0.061738	amac	urea	FALSE
550	19	A2	1410	0.0545771	amac	urea	FALSE
555	19	A2	1130	0.0437391	amac	urea	FALSE
560	19	A2	882	0.0341397	amac	urea	FALSE
565	19	A2	702	0.0271724	amac	urea	FALSE
570	19	A2	620	0.0239985	amac	urea	FALSE
575	19	A2	558	0.0215986	amac	urea	FALSE
580	19	A2	369	0.0142829	amac	urea	FALSE
585	19	A2	458	0.0177279	amac	urea	FALSE
590	19	A2	333	0.0128895	amac	urea	FALSE
595	19	A2	239	0.00925102	amac	urea	FALSE
600	19	A2	153	0.0059222	amac	urea	FALSE
605	19	A2	156	0.00603832	amac	urea	FALSE
610	19	A2	76	0.00294175	amac	urea	FALSE
615	19	A2	57	0.00220631	amac	urea	FALSE
620	19	A2	109	0.00421908	amac	urea	FALSE
625	19	A2	22	0.000851558	amac	urea	FALSE
630	19	A2	26	0.00100639	amac	urea	FALSE
635	19	A2	-2	-7.74e-05	amac	urea	FALSE
640	19	A2	29	0.00112251	amac	urea	FALSE
645	19	A2	-86	-0.00332882	amac	urea	FALSE
650	19	A2	40	0.00154829	amac	urea	FALSE
655	19	A2	46	0.00178053	amac	urea	FALSE
660	19	A2	187	0.00723824	amac	urea	FALSE
665	19	A2	282	0.0109154	amac	urea	FALSE
670	19	A2	-35	-0.00135475	amac	urea	FALSE
675	19	A2	-126	-0.0048771	amac	urea	FALSE
680	19	A2	-124	-0.00479969	amac	urea	FALSE
685	19	A2	0	0	amac	urea	FALSE
690	19	A2	417	0.0161409	amac	urea	FALSE
695	19	A2	-532	-0.0205922	amac	urea	FALSE
700	19	A2	-502	-0.019431	amac	urea	FALSE
450	20	A2	70	0.0027095	amac	urea	FALSE
455	20	A2	42	0.0016257	amac	urea	FALSE
460	20	A2	73	0.00282562	amac	urea	FALSE
465	20	A2	29	0.00112251	amac	urea	FALSE
470	20	A2	87	0.00336753	amac	urea	FALSE
475	20	A2	140	0.00541901	amac	urea	FALSE
480	20	A2	147	0.00568996	amac	urea	FALSE
485	20	A2	375	0.0145152	amac	urea	FALSE
490	20	A2	848	0.0328237	amac	urea	FALSE
495	20	A2	1511	0.0584865	amac	urea	FALSE
500	20	A2	2488	0.0963035	amac	urea	FALSE
505	20	A2	3547	0.137294	amac	urea	FALSE
510	20	A2	4248	0.164428	amac	urea	TRUE
515	20	A2	3922	0.15181	amac	urea	FALSE
520	20	A2	3526	0.136482	amac	urea	FALSE
525	20	A2	2885	0.11167	amac	urea	FALSE
530	20	A2	2228	0.0862396	amac	urea	FALSE
535	20	A2	1876	0.0726147	amac	urea	FALSE
540	20	A2	1669	0.0646023	amac	urea	FALSE
545	20	A2	1506	0.058293	amac	urea	FALSE
550	20	A2	1351	0.0522934	amac	urea	FALSE
555	20	A2	1167	0.0451713	amac	urea	FALSE
560	20	A2	889	0.0344107	amac	urea	FALSE
565	20	A2	720	0.0278692	amac	urea	FALSE
570	20	A2	554	0.0214438	amac	urea	FALSE
575	20	A2	458	0.0177279	amac	urea	FALSE
580	20	A2	425	0.0164506	amac	urea	FALSE
585	20	A2	292	0.0113025	amac	urea	FALSE
590	20	A2	277	0.0107219	amac	urea	FALSE
595	20	A2	207	0.00801239	amac	urea	FALSE
600	20	A2	234	0.00905748	amac	urea	FALSE
605	20	A2	193	0.00747049	amac	urea	FALSE
610	20	A2	110	0.00425779	amac	urea	FALSE
615	20	A2	81	0.00313528	amac	urea	FALSE
620	20	A2	56	0.0021676	amac	urea	FALSE
625	20	A2	175	0.00677376	amac	urea	FALSE
630	20	A2	27	0.00104509	amac	urea	FALSE
635	20	A2	35	0.00135475	amac	urea	FALSE
640	20	A2	-67	-0.00259338	amac	urea	FALSE
645	20	A2	116	0.00449003	amac	urea	FALSE
650	20	A2	271	0.0104896	amac	urea	FALSE
655	20	A2	-112	-0.0043352	amac	urea	FALSE
660	20	A2	-178	-0.00688988	amac	urea	FALSE
665	20	A2	-101	-0.00390943	amac	urea	FALSE
670	20	A2	-67	-0.00259338	amac	urea	FALSE
675	20	A2	174	0.00673505	amac	urea	FALSE
680	20	A2	434	0.0167989	amac	urea	FALSE
685	20	A2	93	0.00359977	amac	urea	FALSE
690	20	A2	488	0.0188891	amac	urea	FALSE
695	20	A2	22	0.000851558	amac	urea	FALSE
700	20	A2	-490	-0.0189665	amac	urea	FALSE
450	21	A2	-20	-0.000774144	amac	urea	FALSE
455	21	A2	-7	-0.00027095	amac	urea	FALSE
460	21	A2	-13	-0.000503193	amac	urea	FALSE
465	21	A2	59	0.00228372	amac	urea	FALSE
470	21	A2	78	0.00301916	amac	urea	FALSE
475	21	A2	31	0.00119992	amac	urea	FALSE
480	21	A2	143	0.00553513	amac	urea	FALSE
485	21	A2	286	0.0110703	amac	urea	FALSE
490	21	A2	770	0.0298045	amac	urea	FALSE
495	21	A2	1392	0.0538804	amac	urea	FALSE
500	21	A2	2362	0.0914264	amac	urea	FALSE
505	21	A2	3213	0.124366	amac	urea	FALSE
510	21	A2	3969	0.153629	amac	urea	TRUE
515	21	A2	3751	0.145191	amac	urea	FALSE
520	21	A2	3156	0.12216	amac	urea	FALSE
525	21	A2	2751	0.106483	amac	urea	FALSE
530	21	A2	2055	0.0795433	amac	urea	FALSE
535	21	A2	1756	0.0679698	amac	urea	FALSE
540	21	A2	1571	0.060809	amac	urea	FALSE
545	21	A2	1340	0.0518676	amac	urea	FALSE
550	21	A2	1239	0.0479582	amac	urea	FALSE
555	21	A2	964	0.0373137	amac	urea	FALSE
560	21	A2	767	0.0296884	amac	urea	FALSE
565	21	A2	710	0.0274821	amac	urea	FALSE
570	21	A2	575	0.0222566	amac	urea	FALSE
575	21	A2	375	0.0145152	amac	urea	FALSE
580	21	A2	293	0.0113412	amac	urea	FALSE
585	21	A2	268	0.0103735	amac	urea	FALSE
590	21	A2	150	0.00580608	amac	urea	FALSE
595	21	A2	248	0.00959938	amac	urea	FALSE
600	21	A2	192	0.00743178	amac	urea	FALSE
605	21	A2	158	0.00611573	amac	urea	FALSE
610	21	A2	178	0.00688988	amac	urea	FALSE
615	21	A2	152	0.00588349	amac	urea	FALSE
620	21	A2	48	0.00185794	amac	urea	FALSE
625	21	A2	104	0.00402555	amac	urea	FALSE
630	21	A2	-8	-0.000309657	amac	urea	FALSE
635	21	A2	36	0.00139346	amac	urea	FALSE
640	21	A2	-30	-0.00116121	amac	urea	FALSE
645	21	A2	77	0.00298045	amac	urea	FALSE
650	21	A2	65	0.00251597	amac	urea	FALSE
655	21	A2	73	0.00282562	amac	urea	FALSE
660	21	A2	65	0.00251597	amac	urea	FALSE
665	21	A2	-83	-0.0032127	amac	urea	FALSE
670	21	A2	-56	-0.0021676	amac	urea	FALSE
675	21	A2	374	0.0144765	amac	urea	FALSE
680	21	A2	-179	-0.00692859	amac	urea	FALSE
685	21	A2	-142	-0.00549642	amac	urea	FALSE
690	21	A2	-192	-0.00743178	amac	urea	FALSE
695	21	A2	0	0	amac	urea	FALSE
700	21	A2	265	0.0102574	amac	urea	FALSE
450	22	A2	59	0.00228372	amac	urea	FALSE
455	22	A2	70	0.0027095	amac	urea	FALSE
460	22	A2	95	0.00367718	amac	urea	FALSE
465	22	A2	68	0.00263209	amac	urea	FALSE
470	22	A2	81	0.00313528	amac	urea	FALSE
475	22	A2	53	0.00205148	amac	urea	FALSE
480	22	A2	145	0.00561254	amac	urea	FALSE
485	22	A2	329	0.0127347	amac	urea	FALSE
490	22	A2	789	0.03054	amac	urea	FALSE
495	22	A2	1337	0.0517515	amac	urea	FALSE
500	22	A2	2266	0.0877105	amac	urea	FALSE
505	22	A2	3209	0.124211	amac	urea	FALSE
510	22	A2	3833	0.148365	amac	urea	TRUE
515	22	A2	3681	0.142481	amac	urea	FALSE
520	22	A2	3153	0.122044	amac	urea	FALSE
525	22	A2	2617	0.101297	amac	urea	FALSE
530	22	A2	2071	0.0801626	amac	urea	FALSE
535	22	A2	1712	0.0662667	amac	urea	FALSE
540	22	A2	1508	0.0583704	amac	urea	FALSE
545	22	A2	1356	0.0524869	amac	urea	FALSE
550	22	A2	1213	0.0469518	amac	urea	FALSE
555	22	A2	1009	0.0390555	amac	urea	FALSE
560	22	A2	803	0.0310819	amac	urea	FALSE
565	22	A2	643	0.0248887	amac	urea	FALSE
570	22	A2	528	0.0204374	amac	urea	FALSE
575	22	A2	387	0.0149797	amac	urea	FALSE
580	22	A2	284	0.0109928	amac	urea	FALSE
585	22	A2	251	0.0097155	amac	urea	FALSE
590	22	A2	216	0.00836075	amac	urea	FALSE
595	22	A2	217	0.00839946	amac	urea	FALSE
600	22	A2	175	0.00677376	amac	urea	FALSE
605	22	A2	56	0.0021676	amac	urea	FALSE
610	22	A2	31	0.00119992	amac	urea	FALSE
615	22	A2	122	0.00472228	amac	urea	FALSE
620	22	A2	60	0.00232243	amac	urea	FALSE
625	22	A2	96	0.00371589	amac	urea	FALSE
630	22	A2	58	0.00224502	amac	urea	FALSE
635	22	A2	146	0.00565125	amac	urea	FALSE
640	22	A2	-77	-0.00298045	amac	urea	FALSE
645	22	A2	-57	-0.00220631	amac	urea	FALSE
650	22	A2	45	0.00174182	amac	urea	FALSE
655	22	A2	183	0.00708341	amac	urea	FALSE
660	22	A2	292	0.0113025	amac	urea	FALSE
665	22	A2	114	0.00441262	amac	urea	FALSE
670	22	A2	327	0.0126572	amac	urea	FALSE
675	22	A2	174	0.00673505	amac	urea	FALSE
680	22	A2	29	0.00112251	amac	urea	FALSE
685	22	A2	177	0.00685117	amac	urea	FALSE
690	22	A2	0	0	amac	urea	FALSE
695	22	A2	-1	-3.87e-05	amac	urea	FALSE
700	22	A2	481	0.0186182	amac	urea	FALSE
450	23	A2	76	0.00294175	amac	urea	FALSE
455	23	A2	9	0.000348365	amac	urea	FALSE
460	23	A2	-13	-0.000503193	amac	urea	FALSE
465	23	A2	40	0.00154829	amac	urea	FALSE
470	23	A2	95	0.00367718	amac	urea	FALSE
475	23	A2	-8	-0.000309657	amac	urea	FALSE
480	23	A2	25	0.00096768	amac	urea	FALSE
485	23	A2	212	0.00820592	amac	urea	FALSE
490	23	A2	617	0.0238823	amac	urea	FALSE
495	23	A2	1250	0.048384	amac	urea	FALSE
500	23	A2	2068	0.0800464	amac	urea	FALSE
505	23	A2	3002	0.116199	amac	urea	FALSE
510	23	A2	3553	0.137527	amac	urea	TRUE
515	23	A2	3377	0.130714	amac	urea	FALSE
520	23	A2	2962	0.114651	amac	urea	FALSE
525	23	A2	2439	0.0944068	amac	urea	FALSE
530	23	A2	1856	0.0718405	amac	urea	FALSE
535	23	A2	1531	0.0592607	amac	urea	FALSE
540	23	A2	1418	0.0548868	amac	urea	FALSE
545	23	A2	1264	0.0489259	amac	urea	FALSE
550	23	A2	1072	0.0414941	amac	urea	FALSE
555	23	A2	894	0.0346042	amac	urea	FALSE
560	23	A2	693	0.0268241	amac	urea	FALSE
565	23	A2	568	0.0219857	amac	urea	FALSE
570	23	A2	441	0.0170699	amac	urea	FALSE
575	23	A2	353	0.0136636	amac	urea	FALSE
580	23	A2	268	0.0103735	amac	urea	FALSE
585	23	A2	226	0.00874782	amac	urea	FALSE
590	23	A2	267	0.0103348	amac	urea	FALSE
595	23	A2	188	0.00727695	amac	urea	FALSE
600	23	A2	77	0.00298045	amac	urea	FALSE
605	23	A2	141	0.00545771	amac	urea	FALSE
610	23	A2	71	0.00274821	amac	urea	FALSE
615	23	A2	86	0.00332882	amac	urea	FALSE
620	23	A2	109	0.00421908	amac	urea	FALSE
625	23	A2	-41	-0.00158699	amac	urea	FALSE
630	23	A2	135	0.00522547	amac	urea	FALSE
635	23	A2	-72	-0.00278692	amac	urea	FALSE
640	23	A2	-22	-0.000851558	amac	urea	FALSE
645	23	A2	42	0.0016257	amac	urea	FALSE
650	23	A2	0	0	amac	urea	FALSE
655	23	A2	-24	-0.000928972	amac	urea	FALSE
660	23	A2	-207	-0.00801239	amac	urea	FALSE
665	23	A2	-285	-0.0110315	amac	urea	FALSE
670	23	A2	-299	-0.0115734	amac	urea	FALSE
675	23	A2	397	0.0153668	amac	urea	FALSE
680	23	A2	61	0.00236114	amac	urea	FALSE
685	23	A2	-224	-0.00867041	amac	urea	FALSE
690	23	A2	-521	-0.0201664	amac	urea	FALSE
695	23	A2	806	0.031198	amac	urea	FALSE
700	23	A2	540	0.0209019	amac	urea	FALSE
450	24	A2	-49	-0.00189665	amac	urea	FALSE
455	24	A2	49	0.00189665	amac	urea	FALSE
460	24	A2	16	0.000619315	amac	urea	FALSE
465	24	A2	106	0.00410296	amac	urea	FALSE
470	24	A2	46	0.00178053	amac	urea	FALSE
475	24	A2	88	0.00340623	amac	urea	FALSE
480	24	A2	111	0.0042965	amac	urea	FALSE
485	24	A2	227	0.00878653	amac	urea	FALSE
490	24	A2	657	0.0254306	amac	urea	FALSE
495	24	A2	1245	0.0481904	amac	urea	FALSE
500	24	A2	1980	0.0766402	amac	urea	FALSE
505	24	A2	2968	0.114883	amac	urea	FALSE
510	24	A2	3336	0.129127	amac	urea	TRUE
515	24	A2	3287	0.127231	amac	urea	FALSE
520	24	A2	2729	0.105632	amac	urea	FALSE
525	24	A2	2267	0.0877492	amac	urea	FALSE
530	24	A2	1915	0.0741243	amac	urea	FALSE
535	24	A2	1567	0.0606542	amac	urea	FALSE
540	24	A2	1436	0.0555835	amac	urea	FALSE
545	24	A2	1188	0.0459841	amac	urea	FALSE
550	24	A2	1098	0.0425005	amac	urea	FALSE
555	24	A2	873	0.0337914	amac	urea	FALSE
560	24	A2	761	0.0294562	amac	urea	FALSE
565	24	A2	619	0.0239597	amac	urea	FALSE
570	24	A2	529	0.0204761	amac	urea	FALSE
575	24	A2	422	0.0163344	amac	urea	FALSE
580	24	A2	319	0.0123476	amac	urea	FALSE
585	24	A2	251	0.0097155	amac	urea	FALSE
590	24	A2	204	0.00789626	amac	urea	FALSE
595	24	A2	210	0.00812851	amac	urea	FALSE
600	24	A2	121	0.00468357	amac	urea	FALSE
605	24	A2	37	0.00143217	amac	urea	FALSE
610	24	A2	95	0.00367718	amac	urea	FALSE
615	24	A2	39	0.00150958	amac	urea	FALSE
620	24	A2	126	0.0048771	amac	urea	FALSE
625	24	A2	105	0.00406425	amac	urea	FALSE
630	24	A2	71	0.00274821	amac	urea	FALSE
635	24	A2	89	0.00344494	amac	urea	FALSE
640	24	A2	40	0.00154829	amac	urea	FALSE
645	24	A2	-9	-0.000348365	amac	urea	FALSE
650	24	A2	-38	-0.00147087	amac	urea	FALSE
655	24	A2	-41	-0.00158699	amac	urea	FALSE
660	24	A2	-37	-0.00143217	amac	urea	FALSE
665	24	A2	260	0.0100639	amac	urea	FALSE
670	24	A2	-42	-0.0016257	amac	urea	FALSE
675	24	A2	33	0.00127734	amac	urea	FALSE
680	24	A2	144	0.00557383	amac	urea	FALSE
685	24	A2	-532	-0.0205922	amac	urea	FALSE
690	24	A2	-121	-0.00468357	amac	urea	FALSE
695	24	A2	0	0	amac	urea	FALSE
700	24	A2	1328	0.0514031	amac	urea	FALSE
450	25	A2	12	0.000464486	amac	urea	FALSE
455	25	A2	15	0.000580608	amac	urea	FALSE
460	25	A2	-20	-0.000774144	amac	urea	FALSE
465	25	A2	43	0.00166441	amac	urea	FALSE
470	25	A2	-11	-0.000425779	amac	urea	FALSE
475	25	A2	93	0.00359977	amac	urea	FALSE
480	25	A2	125	0.0048384	amac	urea	FALSE
485	25	A2	281	0.0108767	amac	urea	FALSE
490	25	A2	643	0.0248887	amac	urea	FALSE
495	25	A2	1145	0.0443197	amac	urea	FALSE
500	25	A2	2004	0.0775692	amac	urea	FALSE
505	25	A2	2847	0.110199	amac	urea	FALSE
510	25	A2	3282	0.127037	amac	urea	TRUE
515	25	A2	3216	0.124482	amac	urea	FALSE
520	25	A2	2641	0.102226	amac	urea	FALSE
525	25	A2	2199	0.0851171	amac	urea	FALSE
530	25	A2	1787	0.0691697	amac	urea	FALSE
535	25	A2	1348	0.0521773	amac	urea	FALSE
540	25	A2	1339	0.0518289	amac	urea	FALSE
545	25	A2	1205	0.0466422	amac	urea	FALSE
550	25	A2	1014	0.0392491	amac	urea	FALSE
555	25	A2	876	0.0339075	amac	urea	FALSE
560	25	A2	712	0.0275595	amac	urea	FALSE
565	25	A2	594	0.0229921	amac	urea	FALSE
570	25	A2	456	0.0176505	amac	urea	FALSE
575	25	A2	375	0.0145152	amac	urea	FALSE
580	25	A2	266	0.0102961	amac	urea	FALSE
585	25	A2	181	0.007006	amac	urea	FALSE
590	25	A2	252	0.00975421	amac	urea	FALSE
595	25	A2	185	0.00716083	amac	urea	FALSE
600	25	A2	136	0.00526418	amac	urea	FALSE
605	25	A2	186	0.00719954	amac	urea	FALSE
610	25	A2	131	0.00507064	amac	urea	FALSE
615	25	A2	116	0.00449003	amac	urea	FALSE
620	25	A2	104	0.00402555	amac	urea	FALSE
625	25	A2	15	0.000580608	amac	urea	FALSE
630	25	A2	132	0.00510935	amac	urea	FALSE
635	25	A2	-19	-0.000735436	amac	urea	FALSE
640	25	A2	-66	-0.00255467	amac	urea	FALSE
645	25	A2	-18	-0.000696729	amac	urea	FALSE
650	25	A2	108	0.00418038	amac	urea	FALSE
655	25	A2	81	0.00313528	amac	urea	FALSE
660	25	A2	-67	-0.00259338	amac	urea	FALSE
665	25	A2	-41	-0.00158699	amac	urea	FALSE
670	25	A2	-247	-0.00956067	amac	urea	FALSE
675	25	A2	29	0.00112251	amac	urea	FALSE
680	25	A2	0	0	amac	urea	FALSE
685	25	A2	373	0.0144378	amac	urea	FALSE
690	25	A2	680	0.0263209	amac	urea	FALSE
695	25	A2	723	0.0279853	amac	urea	FALSE
700	25	A2	477	0.0184633	amac	urea	FALSE
450	26	A2	18	0.000696729	amac	urea	FALSE
455	26	A2	1	3.87e-05	amac	urea	FALSE
460	26	A2	21	0.000812851	amac	urea	FALSE
465	26	A2	1	3.87e-05	amac	urea	FALSE
470	26	A2	-7	-0.00027095	amac	urea	FALSE
475	26	A2	-11	-0.000425779	amac	urea	FALSE
480	26	A2	80	0.00309657	amac	urea	FALSE
485	26	A2	255	0.00987033	amac	urea	FALSE
490	26	A2	584	0.022605	amac	urea	FALSE
495	26	A2	1029	0.0398297	amac	urea	FALSE
500	26	A2	1863	0.0721115	amac	urea	FALSE
505	26	A2	2470	0.0956067	amac	urea	FALSE
510	26	A2	2970	0.11496	amac	urea	TRUE
515	26	A2	2963	0.114689	amac	urea	FALSE
520	26	A2	2584	0.100019	amac	urea	FALSE
525	26	A2	2070	0.0801239	amac	urea	FALSE
530	26	A2	1683	0.0651442	amac	urea	FALSE
535	26	A2	1396	0.0540352	amac	urea	FALSE
540	26	A2	1237	0.0478808	amac	urea	FALSE
545	26	A2	1094	0.0423457	amac	urea	FALSE
550	26	A2	928	0.0359203	amac	urea	FALSE
555	26	A2	795	0.0307722	amac	urea	FALSE
560	26	A2	690	0.026708	amac	urea	FALSE
565	26	A2	481	0.0186182	amac	urea	FALSE
570	26	A2	395	0.0152893	amac	urea	FALSE
575	26	A2	309	0.0119605	amac	urea	FALSE
580	26	A2	227	0.00878653	amac	urea	FALSE
585	26	A2	215	0.00832204	amac	urea	FALSE
590	26	A2	238	0.00921231	amac	urea	FALSE
595	26	A2	224	0.00867041	amac	urea	FALSE
600	26	A2	90	0.00348365	amac	urea	FALSE
605	26	A2	186	0.00719954	amac	urea	FALSE
610	26	A2	30	0.00116121	amac	urea	FALSE
615	26	A2	118	0.00456745	amac	urea	FALSE
620	26	A2	-28	-0.0010838	amac	urea	FALSE
625	26	A2	-35	-0.00135475	amac	urea	FALSE
630	26	A2	51	0.00197407	amac	urea	FALSE
635	26	A2	-32	-0.00123863	amac	urea	FALSE
640	26	A2	-125	-0.0048384	amac	urea	FALSE
645	26	A2	-22	-0.000851558	amac	urea	FALSE
650	26	A2	-186	-0.00719954	amac	urea	FALSE
655	26	A2	-7	-0.00027095	amac	urea	FALSE
660	26	A2	180	0.00696729	amac	urea	FALSE
665	26	A2	-44	-0.00170312	amac	urea	FALSE
670	26	A2	27	0.00104509	amac	urea	FALSE
675	26	A2	264	0.0102187	amac	urea	FALSE
680	26	A2	-9	-0.000348365	amac	urea	FALSE
685	26	A2	-321	-0.012425	amac	urea	FALSE
690	26	A2	0	0	amac	urea	FALSE
695	26	A2	810	0.0313528	amac	urea	FALSE
700	26	A2	-12	-0.000464486	amac	urea	FALSE
450	27	A2	2	7.74e-05	amac	urea	FALSE
455	27	A2	-24	-0.000928972	amac	urea	FALSE
460	27	A2	-36	-0.00139346	amac	urea	FALSE
465	27	A2	-18	-0.000696729	amac	urea	FALSE
470	27	A2	-29	-0.00112251	amac	urea	FALSE
475	27	A2	-10	-0.000387072	amac	urea	FALSE
480	27	A2	23	0.000890265	amac	urea	FALSE
485	27	A2	188	0.00727695	amac	urea	FALSE
490	27	A2	523	0.0202439	amac	urea	FALSE
495	27	A2	976	0.0377782	amac	urea	FALSE
500	27	A2	1749	0.0676989	amac	urea	FALSE
505	27	A2	2437	0.0943294	amac	urea	FALSE
510	27	A2	2898	0.112173	amac	urea	TRUE
515	27	A2	2781	0.107645	amac	urea	FALSE
520	27	A2	2516	0.0973873	amac	urea	FALSE
525	27	A2	2071	0.0801626	amac	urea	FALSE
530	27	A2	1602	0.0620089	amac	urea	FALSE
535	27	A2	1291	0.049971	amac	urea	FALSE
540	27	A2	1148	0.0444358	amac	urea	FALSE
545	27	A2	1066	0.0412619	amac	urea	FALSE
550	27	A2	908	0.0351461	amac	urea	FALSE
555	27	A2	671	0.0259725	amac	urea	FALSE
560	27	A2	655	0.0253532	amac	urea	FALSE
565	27	A2	502	0.019431	amac	urea	FALSE
570	27	A2	323	0.0125024	amac	urea	FALSE
575	27	A2	325	0.0125798	amac	urea	FALSE
580	27	A2	253	0.00979292	amac	urea	FALSE
585	27	A2	169	0.00654151	amac	urea	FALSE
590	27	A2	121	0.00468357	amac	urea	FALSE
595	27	A2	54	0.00209019	amac	urea	FALSE
600	27	A2	134	0.00518676	amac	urea	FALSE
605	27	A2	110	0.00425779	amac	urea	FALSE
610	27	A2	107	0.00414167	amac	urea	FALSE
615	27	A2	104	0.00402555	amac	urea	FALSE
620	27	A2	-30	-0.00116121	amac	urea	FALSE
625	27	A2	138	0.00534159	amac	urea	FALSE
630	27	A2	49	0.00189665	amac	urea	FALSE
635	27	A2	81	0.00313528	amac	urea	FALSE
640	27	A2	11	0.000425779	amac	urea	FALSE
645	27	A2	-43	-0.00166441	amac	urea	FALSE
650	27	A2	-147	-0.00568996	amac	urea	FALSE
655	27	A2	-166	-0.00642539	amac	urea	FALSE
660	27	A2	-68	-0.00263209	amac	urea	FALSE
665	27	A2	0	0	amac	urea	FALSE
670	27	A2	-140	-0.00541901	amac	urea	FALSE
675	27	A2	0	0	amac	urea	FALSE
680	27	A2	-142	-0.00549642	amac	urea	FALSE
685	27	A2	-219	-0.00847687	amac	urea	FALSE
690	27	A2	352	0.0136249	amac	urea	FALSE
695	27	A2	0	0	amac	urea	FALSE
700	27	A2	-609	-0.0235727	amac	urea	FALSE
450	28	A2	16	0.000619315	amac	urea	FALSE
455	28	A2	-60	-0.00232243	amac	urea	FALSE
460	28	A2	58	0.00224502	amac	urea	FALSE
465	28	A2	-13	-0.000503193	amac	urea	FALSE
470	28	A2	47	0.00181924	amac	urea	FALSE
475	28	A2	56	0.0021676	amac	urea	FALSE
480	28	A2	3	0.000116122	amac	urea	FALSE
485	28	A2	215	0.00832204	amac	urea	FALSE
490	28	A2	447	0.0173021	amac	urea	FALSE
495	28	A2	896	0.0346816	amac	urea	FALSE
500	28	A2	1593	0.0616605	amac	urea	FALSE
505	28	A2	2386	0.0923553	amac	urea	FALSE
510	28	A2	2858	0.110625	amac	urea	TRUE
515	28	A2	2761	0.106871	amac	urea	FALSE
520	28	A2	2323	0.0899168	amac	urea	FALSE
525	28	A2	2022	0.0782659	amac	urea	FALSE
530	28	A2	1470	0.0568996	amac	urea	FALSE
535	28	A2	1303	0.0504355	amac	urea	FALSE
540	28	A2	1116	0.0431972	amac	urea	FALSE
545	28	A2	1010	0.0390943	amac	urea	FALSE
550	28	A2	871	0.033714	amac	urea	FALSE
555	28	A2	655	0.0253532	amac	urea	FALSE
560	28	A2	648	0.0250823	amac	urea	FALSE
565	28	A2	489	0.0189278	amac	urea	FALSE
570	28	A2	359	0.0138959	amac	urea	FALSE
575	28	A2	303	0.0117283	amac	urea	FALSE
580	28	A2	219	0.00847687	amac	urea	FALSE
585	28	A2	222	0.00859299	amac	urea	FALSE
590	28	A2	213	0.00824463	amac	urea	FALSE
595	28	A2	137	0.00530288	amac	urea	FALSE
600	28	A2	104	0.00402555	amac	urea	FALSE
605	28	A2	128	0.00495452	amac	urea	FALSE
610	28	A2	163	0.00630927	amac	urea	FALSE
615	28	A2	106	0.00410296	amac	urea	FALSE
620	28	A2	77	0.00298045	amac	urea	FALSE
625	28	A2	91	0.00352235	amac	urea	FALSE
630	28	A2	36	0.00139346	amac	urea	FALSE
635	28	A2	44	0.00170312	amac	urea	FALSE
640	28	A2	17	0.000658022	amac	urea	FALSE
645	28	A2	-30	-0.00116121	amac	urea	FALSE
650	28	A2	23	0.000890265	amac	urea	FALSE
655	28	A2	32	0.00123863	amac	urea	FALSE
660	28	A2	-180	-0.00696729	amac	urea	FALSE
665	28	A2	0	0	amac	urea	FALSE
670	28	A2	-327	-0.0126572	amac	urea	FALSE
675	28	A2	139	0.0053803	amac	urea	FALSE
680	28	A2	-88	-0.00340623	amac	urea	FALSE
685	28	A2	541	0.0209406	amac	urea	FALSE
690	28	A2	150	0.00580608	amac	urea	FALSE
695	28	A2	0	0	amac	urea	FALSE
700	28	A2	188	0.00727695	amac	urea	FALSE
450	29	A2	-22	-0.000851558	amac	urea	FALSE
455	29	A2	30	0.00116121	amac	urea	FALSE
460	29	A2	-58	-0.00224502	amac	urea	FALSE
465	29	A2	7	0.00027095	amac	urea	FALSE
470	29	A2	-8	-0.000309657	amac	urea	FALSE
475	29	A2	35	0.00135475	amac	urea	FALSE
480	29	A2	18	0.000696729	amac	urea	FALSE
485	29	A2	217	0.00839946	amac	urea	FALSE
490	29	A2	489	0.0189278	amac	urea	FALSE
495	29	A2	920	0.0356106	amac	urea	FALSE
500	29	A2	1599	0.0618928	amac	urea	FALSE
505	29	A2	2321	0.0898394	amac	urea	FALSE
510	29	A2	2690	0.104122	amac	urea	TRUE
515	29	A2	2610	0.101026	amac	urea	FALSE
520	29	A2	2299	0.0889878	amac	urea	FALSE
525	29	A2	1795	0.0694794	amac	urea	FALSE
530	29	A2	1410	0.0545771	amac	urea	FALSE
535	29	A2	1214	0.0469905	amac	urea	FALSE
540	29	A2	1064	0.0411844	amac	urea	FALSE
545	29	A2	969	0.0375073	amac	urea	FALSE
550	29	A2	852	0.0329785	amac	urea	FALSE
555	29	A2	670	0.0259338	amac	urea	FALSE
560	29	A2	566	0.0219083	amac	urea	FALSE
565	29	A2	450	0.0174182	amac	urea	FALSE
570	29	A2	329	0.0127347	amac	urea	FALSE
575	29	A2	356	0.0137798	amac	urea	FALSE
580	29	A2	219	0.00847687	amac	urea	FALSE
585	29	A2	169	0.00654151	amac	urea	FALSE
590	29	A2	116	0.00449003	amac	urea	FALSE
595	29	A2	150	0.00580608	amac	urea	FALSE
600	29	A2	126	0.0048771	amac	urea	FALSE
605	29	A2	82	0.00317399	amac	urea	FALSE
610	29	A2	106	0.00410296	amac	urea	FALSE
615	29	A2	75	0.00290304	amac	urea	FALSE
620	29	A2	3	0.000116122	amac	urea	FALSE
625	29	A2	65	0.00251597	amac	urea	FALSE
630	29	A2	-30	-0.00116121	amac	urea	FALSE
635	29	A2	15	0.000580608	amac	urea	FALSE
640	29	A2	-63	-0.00243855	amac	urea	FALSE
645	29	A2	-69	-0.0026708	amac	urea	FALSE
650	29	A2	-123	-0.00476098	amac	urea	FALSE
655	29	A2	3	0.000116122	amac	urea	FALSE
660	29	A2	-83	-0.0032127	amac	urea	FALSE
665	29	A2	-5	-0.000193536	amac	urea	FALSE
670	29	A2	-70	-0.0027095	amac	urea	FALSE
675	29	A2	-128	-0.00495452	amac	urea	FALSE
680	29	A2	-197	-0.00762531	amac	urea	FALSE
685	29	A2	77	0.00298045	amac	urea	FALSE
690	29	A2	-285	-0.0110315	amac	urea	FALSE
695	29	A2	111	0.0042965	amac	urea	FALSE
700	29	A2	346	0.0133927	amac	urea	FALSE
450	30	A2	41	0.00158699	amac	urea	FALSE
455	30	A2	-13	-0.000503193	amac	urea	FALSE
460	30	A2	-55	-0.0021289	amac	urea	FALSE
465	30	A2	-6	-0.000232243	amac	urea	FALSE
470	30	A2	103	0.00398684	amac	urea	FALSE
475	30	A2	38	0.00147087	amac	urea	FALSE
480	30	A2	98	0.0037933	amac	urea	FALSE
485	30	A2	189	0.00731566	amac	urea	FALSE
490	30	A2	436	0.0168763	amac	urea	FALSE
495	30	A2	905	0.03503	amac	urea	FALSE
500	30	A2	1494	0.0578285	amac	urea	FALSE
505	30	A2	2259	0.0874395	amac	urea	FALSE
510	30	A2	2542	0.0983937	amac	urea	TRUE
515	30	A2	2450	0.0948326	amac	urea	FALSE
520	30	A2	2259	0.0874395	amac	urea	FALSE
525	30	A2	1765	0.0683182	amac	urea	FALSE
530	30	A2	1388	0.0537256	amac	urea	FALSE
535	30	A2	1137	0.0440101	amac	urea	FALSE
540	30	A2	1035	0.0400619	amac	urea	FALSE
545	30	A2	1009	0.0390555	amac	urea	FALSE
550	30	A2	787	0.0304626	amac	urea	FALSE
555	30	A2	666	0.025779	amac	urea	FALSE
560	30	A2	528	0.0204374	amac	urea	FALSE
565	30	A2	435	0.0168376	amac	urea	FALSE
570	30	A2	336	0.0130056	amac	urea	FALSE
575	30	A2	286	0.0110703	amac	urea	FALSE
580	30	A2	168	0.00650281	amac	urea	FALSE
585	30	A2	195	0.0075479	amac	urea	FALSE
590	30	A2	148	0.00572866	amac	urea	FALSE
595	30	A2	139	0.0053803	amac	urea	FALSE
600	30	A2	92	0.00356106	amac	urea	FALSE
605	30	A2	139	0.0053803	amac	urea	FALSE
610	30	A2	59	0.00228372	amac	urea	FALSE
615	30	A2	61	0.00236114	amac	urea	FALSE
620	30	A2	-49	-0.00189665	amac	urea	FALSE
625	30	A2	114	0.00441262	amac	urea	FALSE
630	30	A2	5	0.000193536	amac	urea	FALSE
635	30	A2	-101	-0.00390943	amac	urea	FALSE
640	30	A2	-144	-0.00557383	amac	urea	FALSE
645	30	A2	4	0.000154829	amac	urea	FALSE
650	30	A2	225	0.00870912	amac	urea	FALSE
655	30	A2	80	0.00309657	amac	urea	FALSE
660	30	A2	-207	-0.00801239	amac	urea	FALSE
665	30	A2	100	0.00387072	amac	urea	FALSE
670	30	A2	36	0.00139346	amac	urea	FALSE
675	30	A2	-356	-0.0137798	amac	urea	FALSE
680	30	A2	164	0.00634798	amac	urea	FALSE
685	30	A2	-201	-0.00778014	amac	urea	FALSE
690	30	A2	0	0	amac	urea	FALSE
695	30	A2	0	0	amac	urea	FALSE
700	30	A2	-1300	-0.0503193	amac	urea	FALSE
450	31	A2	48	0.00185794	amac	urea	FALSE
455	31	A2	26	0.00100639	amac	urea	FALSE
460	31	A2	-9	-0.000348365	amac	urea	FALSE
465	31	A2	7	0.00027095	amac	urea	FALSE
470	31	A2	1	3.87e-05	amac	urea	FALSE
475	31	A2	-6	-0.000232243	amac	urea	FALSE
480	31	A2	91	0.00352235	amac	urea	FALSE
485	31	A2	247	0.00956067	amac	urea	FALSE
490	31	A2	409	0.0158312	amac	urea	FALSE
495	31	A2	847	0.032785	amac	urea	FALSE
500	31	A2	1442	0.0558158	amac	urea	FALSE
505	31	A2	2057	0.0796207	amac	urea	FALSE
510	31	A2	2417	0.0935553	amac	urea	TRUE
515	31	A2	2346	0.090807	amac	urea	FALSE
520	31	A2	2035	0.0787691	amac	urea	FALSE
525	31	A2	1701	0.0658409	amac	urea	FALSE
530	31	A2	1251	0.0484227	amac	urea	FALSE
535	31	A2	1072	0.0414941	amac	urea	FALSE
540	31	A2	993	0.0384362	amac	urea	FALSE
545	31	A2	899	0.0347978	amac	urea	FALSE
550	31	A2	843	0.0326302	amac	urea	FALSE
555	31	A2	612	0.0236888	amac	urea	FALSE
560	31	A2	497	0.0192375	amac	urea	FALSE
565	31	A2	454	0.0175731	amac	urea	FALSE
570	31	A2	357	0.0138185	amac	urea	FALSE
575	31	A2	268	0.0103735	amac	urea	FALSE
580	31	A2	255	0.00987033	amac	urea	FALSE
585	31	A2	157	0.00607703	amac	urea	FALSE
590	31	A2	215	0.00832204	amac	urea	FALSE
595	31	A2	220	0.00851558	amac	urea	FALSE
600	31	A2	158	0.00611573	amac	urea	FALSE
605	31	A2	20	0.000774144	amac	urea	FALSE
610	31	A2	17	0.000658022	amac	urea	FALSE
615	31	A2	74	0.00286433	amac	urea	FALSE
620	31	A2	95	0.00367718	amac	urea	FALSE
625	31	A2	100	0.00387072	amac	urea	FALSE
630	31	A2	125	0.0048384	amac	urea	FALSE
635	31	A2	53	0.00205148	amac	urea	FALSE
640	31	A2	111	0.0042965	amac	urea	FALSE
645	31	A2	-55	-0.0021289	amac	urea	FALSE
650	31	A2	144	0.00557383	amac	urea	FALSE
655	31	A2	85	0.00329011	amac	urea	FALSE
660	31	A2	-100	-0.00387072	amac	urea	FALSE
665	31	A2	132	0.00510935	amac	urea	FALSE
670	31	A2	-198	-0.00766402	amac	urea	FALSE
675	31	A2	100	0.00387072	amac	urea	FALSE
680	31	A2	306	0.0118444	amac	urea	FALSE
685	31	A2	-667	-0.0258177	amac	urea	FALSE
690	31	A2	208	0.00805109	amac	urea	FALSE
695	31	A2	0	0	amac	urea	FALSE
700	31	A2	-895	-0.0346429	amac	urea	FALSE
450	32	A2	37	0.00143217	amac	urea	FALSE
455	32	A2	47	0.00181924	amac	urea	FALSE
460	32	A2	60	0.00232243	amac	urea	FALSE
465	32	A2	76	0.00294175	amac	urea	FALSE
470	32	A2	21	0.000812851	amac	urea	FALSE
475	32	A2	136	0.00526418	amac	urea	FALSE
480	32	A2	189	0.00731566	amac	urea	FALSE
485	32	A2	299	0.0115734	amac	urea	FALSE
490	32	A2	540	0.0209019	amac	urea	FALSE
495	32	A2	837	0.0323979	amac	urea	FALSE
500	32	A2	1403	0.0543062	amac	urea	FALSE
505	32	A2	2041	0.0790014	amac	urea	FALSE
510	32	A2	2425	0.0938649	amac	urea	TRUE
515	32	A2	2412	0.0933617	amac	urea	FALSE
520	32	A2	2030	0.0785756	amac	urea	FALSE
525	32	A2	1726	0.0668086	amac	urea	FALSE
530	32	A2	1336	0.0517128	amac	urea	FALSE
535	32	A2	1025	0.0396749	amac	urea	FALSE
540	32	A2	955	0.0369654	amac	urea	FALSE
545	32	A2	850	0.0329011	amac	urea	FALSE
550	32	A2	827	0.0320108	amac	urea	FALSE
555	32	A2	689	0.0266692	amac	urea	FALSE
560	32	A2	553	0.0214051	amac	urea	FALSE
565	32	A2	451	0.0174569	amac	urea	FALSE
570	32	A2	335	0.0129669	amac	urea	FALSE
575	32	A2	246	0.00952197	amac	urea	FALSE
580	32	A2	175	0.00677376	amac	urea	FALSE
585	32	A2	239	0.00925102	amac	urea	FALSE
590	32	A2	162	0.00627056	amac	urea	FALSE
595	32	A2	161	0.00623186	amac	urea	FALSE
600	32	A2	78	0.00301916	amac	urea	FALSE
605	32	A2	117	0.00452874	amac	urea	FALSE
610	32	A2	71	0.00274821	amac	urea	FALSE
615	32	A2	56	0.0021676	amac	urea	FALSE
620	32	A2	45	0.00174182	amac	urea	FALSE
625	32	A2	13	0.000503193	amac	urea	FALSE
630	32	A2	-62	-0.00239984	amac	urea	FALSE
635	32	A2	94	0.00363847	amac	urea	FALSE
640	32	A2	53	0.00205148	amac	urea	FALSE
645	32	A2	26	0.00100639	amac	urea	FALSE
650	32	A2	-182	-0.00704471	amac	urea	FALSE
655	32	A2	-57	-0.00220631	amac	urea	FALSE
660	32	A2	-81	-0.00313528	amac	urea	FALSE
665	32	A2	175	0.00677376	amac	urea	FALSE
670	32	A2	272	0.0105284	amac	urea	FALSE
675	32	A2	-134	-0.00518676	amac	urea	FALSE
680	32	A2	-75	-0.00290304	amac	urea	FALSE
685	32	A2	187	0.00723824	amac	urea	FALSE
690	32	A2	278	0.0107606	amac	urea	FALSE
695	32	A2	427	0.016528	amac	urea	FALSE
700	32	A2	-419	-0.0162183	amac	urea	FALSE
450	33	A2	32	0.00123863	amac	urea	FALSE
455	33	A2	-6	-0.000232243	amac	urea	FALSE
460	33	A2	-39	-0.00150958	amac	urea	FALSE
465	33	A2	-37	-0.00143217	amac	urea	FALSE
470	33	A2	-30	-0.00116121	amac	urea	FALSE
475	33	A2	28	0.0010838	amac	urea	FALSE
480	33	A2	145	0.00561254	amac	urea	FALSE
485	33	A2	177	0.00685117	amac	urea	FALSE
490	33	A2	414	0.0160248	amac	urea	FALSE
495	33	A2	830	0.032127	amac	urea	FALSE
500	33	A2	1330	0.0514805	amac	urea	FALSE
505	33	A2	1895	0.0733501	amac	urea	FALSE
510	33	A2	2260	0.0874782	amac	urea	TRUE
515	33	A2	2141	0.0828721	amac	urea	FALSE
520	33	A2	1842	0.0712986	amac	urea	FALSE
525	33	A2	1535	0.0594155	amac	urea	FALSE
530	33	A2	1126	0.0435843	amac	urea	FALSE
535	33	A2	1024	0.0396362	amac	urea	FALSE
540	33	A2	866	0.0335204	amac	urea	FALSE
545	33	A2	779	0.0301529	amac	urea	FALSE
550	33	A2	683	0.026437	amac	urea	FALSE
555	33	A2	589	0.0227985	amac	urea	FALSE
560	33	A2	468	0.018115	amac	urea	FALSE
565	33	A2	381	0.0147474	amac	urea	FALSE
570	33	A2	350	0.0135475	amac	urea	FALSE
575	33	A2	260	0.0100639	amac	urea	FALSE
580	33	A2	252	0.00975421	amac	urea	FALSE
585	33	A2	191	0.00739307	amac	urea	FALSE
590	33	A2	138	0.00534159	amac	urea	FALSE
595	33	A2	60	0.00232243	amac	urea	FALSE
600	33	A2	85	0.00329011	amac	urea	FALSE
605	33	A2	83	0.0032127	amac	urea	FALSE
610	33	A2	-23	-0.000890265	amac	urea	FALSE
615	33	A2	113	0.00437391	amac	urea	FALSE
620	33	A2	39	0.00150958	amac	urea	FALSE
625	33	A2	77	0.00298045	amac	urea	FALSE
630	33	A2	84	0.0032514	amac	urea	FALSE
635	33	A2	71	0.00274821	amac	urea	FALSE
640	33	A2	-10	-0.000387072	amac	urea	FALSE
645	33	A2	107	0.00414167	amac	urea	FALSE
650	33	A2	21	0.000812851	amac	urea	FALSE
655	33	A2	241	0.00932843	amac	urea	FALSE
660	33	A2	-217	-0.00839946	amac	urea	FALSE
665	33	A2	-276	-0.0106832	amac	urea	FALSE
670	33	A2	83	0.0032127	amac	urea	FALSE
675	33	A2	-249	-0.00963809	amac	urea	FALSE
680	33	A2	-559	-0.0216373	amac	urea	FALSE
685	33	A2	-167	-0.0064641	amac	urea	FALSE
690	33	A2	0	0	amac	urea	FALSE
695	33	A2	0	0	amac	urea	FALSE
700	33	A2	-59	-0.00228372	amac	urea	FALSE
450	34	A2	66	0.00255467	amac	urea	FALSE
455	34	A2	44	0.00170312	amac	urea	FALSE
460	34	A2	17	0.000658022	amac	urea	FALSE
465	34	A2	119	0.00460615	amac	urea	FALSE
470	34	A2	20	0.000774144	amac	urea	FALSE
475	34	A2	18	0.000696729	amac	urea	FALSE
480	34	A2	115	0.00445133	amac	urea	FALSE
485	34	A2	233	0.00901877	amac	urea	FALSE
490	34	A2	311	0.0120379	amac	urea	FALSE
495	34	A2	720	0.0278692	amac	urea	FALSE
500	34	A2	1257	0.0486549	amac	urea	FALSE
505	34	A2	1842	0.0712986	amac	urea	FALSE
510	34	A2	2213	0.085659	amac	urea	TRUE
515	34	A2	2036	0.0788078	amac	urea	FALSE
520	34	A2	1782	0.0689762	amac	urea	FALSE
525	34	A2	1501	0.0580995	amac	urea	FALSE
530	34	A2	1095	0.0423844	amac	urea	FALSE
535	34	A2	970	0.037546	amac	urea	FALSE
540	34	A2	882	0.0341397	amac	urea	FALSE
545	34	A2	850	0.0329011	amac	urea	FALSE
550	34	A2	753	0.0291465	amac	urea	FALSE
555	34	A2	587	0.0227211	amac	urea	FALSE
560	34	A2	480	0.0185794	amac	urea	FALSE
565	34	A2	346	0.0133927	amac	urea	FALSE
570	34	A2	285	0.0110315	amac	urea	FALSE
575	34	A2	211	0.00816722	amac	urea	FALSE
580	34	A2	139	0.0053803	amac	urea	FALSE
585	34	A2	190	0.00735436	amac	urea	FALSE
590	34	A2	149	0.00576737	amac	urea	FALSE
595	34	A2	92	0.00356106	amac	urea	FALSE
600	34	A2	98	0.0037933	amac	urea	FALSE
605	34	A2	-41	-0.00158699	amac	urea	FALSE
610	34	A2	136	0.00526418	amac	urea	FALSE
615	34	A2	120	0.00464486	amac	urea	FALSE
620	34	A2	48	0.00185794	amac	urea	FALSE
625	34	A2	-29	-0.00112251	amac	urea	FALSE
630	34	A2	26	0.00100639	amac	urea	FALSE
635	34	A2	20	0.000774144	amac	urea	FALSE
640	34	A2	69	0.0026708	amac	urea	FALSE
645	34	A2	-18	-0.000696729	amac	urea	FALSE
650	34	A2	-45	-0.00174182	amac	urea	FALSE
655	34	A2	-50	-0.00193536	amac	urea	FALSE
660	34	A2	57	0.00220631	amac	urea	FALSE
665	34	A2	97	0.0037546	amac	urea	FALSE
670	34	A2	93	0.00359977	amac	urea	FALSE
675	34	A2	346	0.0133927	amac	urea	FALSE
680	34	A2	-106	-0.00410296	amac	urea	FALSE
685	34	A2	124	0.00479969	amac	urea	FALSE
690	34	A2	442	0.0171086	amac	urea	FALSE
695	34	A2	-79	-0.00305787	amac	urea	FALSE
700	34	A2	474	0.0183472	amac	urea	FALSE
450	35	A2	28	0.0010838	amac	urea	FALSE
455	35	A2	47	0.00181924	amac	urea	FALSE
460	35	A2	54	0.00209019	amac	urea	FALSE
465	35	A2	86	0.00332882	amac	urea	FALSE
470	35	A2	11	0.000425779	amac	urea	FALSE
475	35	A2	-24	-0.000928972	amac	urea	FALSE
480	35	A2	69	0.0026708	amac	urea	FALSE
485	35	A2	236	0.0091349	amac	urea	FALSE
490	35	A2	357	0.0138185	amac	urea	FALSE
495	35	A2	717	0.027753	amac	urea	FALSE
500	35	A2	1256	0.0486162	amac	urea	FALSE
505	35	A2	1705	0.0659957	amac	urea	FALSE
510	35	A2	2124	0.0822141	amac	urea	TRUE
515	35	A2	2005	0.0776079	amac	urea	FALSE
520	35	A2	1731	0.0670021	amac	urea	FALSE
525	35	A2	1452	0.0562028	amac	urea	FALSE
530	35	A2	1086	0.042036	amac	urea	FALSE
535	35	A2	876	0.0339075	amac	urea	FALSE
540	35	A2	902	0.0349139	amac	urea	FALSE
545	35	A2	799	0.030927	amac	urea	FALSE
550	35	A2	647	0.0250435	amac	urea	FALSE
555	35	A2	548	0.0212115	amac	urea	FALSE
560	35	A2	446	0.0172634	amac	urea	FALSE
565	35	A2	365	0.0141281	amac	urea	FALSE
570	35	A2	280	0.010838	amac	urea	FALSE
575	35	A2	216	0.00836075	amac	urea	FALSE
580	35	A2	225	0.00870912	amac	urea	FALSE
585	35	A2	146	0.00565125	amac	urea	FALSE
590	35	A2	89	0.00344494	amac	urea	FALSE
595	35	A2	177	0.00685117	amac	urea	FALSE
600	35	A2	17	0.000658022	amac	urea	FALSE
605	35	A2	80	0.00309657	amac	urea	FALSE
610	35	A2	95	0.00367718	amac	urea	FALSE
615	35	A2	71	0.00274821	amac	urea	FALSE
620	35	A2	79	0.00305787	amac	urea	FALSE
625	35	A2	47	0.00181924	amac	urea	FALSE
630	35	A2	64	0.00247726	amac	urea	FALSE
635	35	A2	119	0.00460615	amac	urea	FALSE
640	35	A2	-178	-0.00688988	amac	urea	FALSE
645	35	A2	-19	-0.000735436	amac	urea	FALSE
650	35	A2	-19	-0.000735436	amac	urea	FALSE
655	35	A2	-225	-0.00870912	amac	urea	FALSE
660	35	A2	167	0.0064641	amac	urea	FALSE
665	35	A2	-38	-0.00147087	amac	urea	FALSE
670	35	A2	164	0.00634798	amac	urea	FALSE
675	35	A2	90	0.00348365	amac	urea	FALSE
680	35	A2	28	0.0010838	amac	urea	FALSE
685	35	A2	-206	-0.00797368	amac	urea	FALSE
690	35	A2	290	0.0112251	amac	urea	FALSE
695	35	A2	183	0.00708341	amac	urea	FALSE
700	35	A2	8	0.000309657	amac	urea	FALSE
450	36	A2	19	0.000735436	amac	urea	FALSE
455	36	A2	52	0.00201277	amac	urea	FALSE
460	36	A2	-56	-0.0021676	amac	urea	FALSE
465	36	A2	-68	-0.00263209	amac	urea	FALSE
470	36	A2	55	0.0021289	amac	urea	FALSE
475	36	A2	9	0.000348365	amac	urea	FALSE
480	36	A2	119	0.00460615	amac	urea	FALSE
485	36	A2	153	0.0059222	amac	urea	FALSE
490	36	A2	407	0.0157538	amac	urea	FALSE
495	36	A2	700	0.027095	amac	urea	FALSE
500	36	A2	1196	0.0462938	amac	urea	FALSE
505	36	A2	1731	0.0670021	amac	urea	FALSE
510	36	A2	1933	0.074821	amac	urea	TRUE
515	36	A2	1867	0.0722663	amac	urea	FALSE
520	36	A2	1685	0.0652216	amac	urea	FALSE
525	36	A2	1416	0.0548094	amac	urea	FALSE
530	36	A2	1068	0.0413393	amac	urea	FALSE
535	36	A2	873	0.0337914	amac	urea	FALSE
540	36	A2	726	0.0281014	amac	urea	FALSE
545	36	A2	760	0.0294175	amac	urea	FALSE
550	36	A2	624	0.0241533	amac	urea	FALSE
555	36	A2	497	0.0192375	amac	urea	FALSE
560	36	A2	471	0.0182311	amac	urea	FALSE
565	36	A2	342	0.0132379	amac	urea	FALSE
570	36	A2	307	0.0118831	amac	urea	FALSE
575	36	A2	248	0.00959938	amac	urea	FALSE
580	36	A2	127	0.00491581	amac	urea	FALSE
585	36	A2	119	0.00460615	amac	urea	FALSE
590	36	A2	114	0.00441262	amac	urea	FALSE
595	36	A2	79	0.00305787	amac	urea	FALSE
600	36	A2	98	0.0037933	amac	urea	FALSE
605	36	A2	65	0.00251597	amac	urea	FALSE
610	36	A2	38	0.00147087	amac	urea	FALSE
615	36	A2	159	0.00615444	amac	urea	FALSE
620	36	A2	55	0.0021289	amac	urea	FALSE
625	36	A2	-37	-0.00143217	amac	urea	FALSE
630	36	A2	6	0.000232243	amac	urea	FALSE
635	36	A2	41	0.00158699	amac	urea	FALSE
640	36	A2	179	0.00692859	amac	urea	FALSE
645	36	A2	-54	-0.00209019	amac	urea	FALSE
650	36	A2	173	0.00669634	amac	urea	FALSE
655	36	A2	153	0.0059222	amac	urea	FALSE
660	36	A2	29	0.00112251	amac	urea	FALSE
665	36	A2	-183	-0.00708341	amac	urea	FALSE
670	36	A2	297	0.011496	amac	urea	FALSE
675	36	A2	17	0.000658022	amac	urea	FALSE
680	36	A2	237	0.0091736	amac	urea	FALSE
685	36	A2	456	0.0176505	amac	urea	FALSE
690	36	A2	-268	-0.0103735	amac	urea	FALSE
695	36	A2	-947	-0.0366557	amac	urea	FALSE
700	36	A2	0	0	amac	urea	FALSE
450	37	A2	53	0.00205148	amac	urea	FALSE
455	37	A2	44	0.00170312	amac	urea	FALSE
460	37	A2	-1	-3.87e-05	amac	urea	FALSE
465	37	A2	-4	-0.000154829	amac	urea	FALSE
470	37	A2	38	0.00147087	amac	urea	FALSE
475	37	A2	116	0.00449003	amac	urea	FALSE
480	37	A2	189	0.00731566	amac	urea	FALSE
485	37	A2	112	0.0043352	amac	urea	FALSE
490	37	A2	401	0.0155216	amac	urea	FALSE
495	37	A2	702	0.0271724	amac	urea	FALSE
500	37	A2	1100	0.0425779	amac	urea	FALSE
505	37	A2	1642	0.0635572	amac	urea	FALSE
510	37	A2	1875	0.072576	amac	urea	TRUE
515	37	A2	1894	0.0733114	amac	urea	FALSE
520	37	A2	1704	0.065957	amac	urea	FALSE
525	37	A2	1297	0.0502032	amac	urea	FALSE
530	37	A2	1088	0.0421134	amac	urea	FALSE
535	37	A2	849	0.0328624	amac	urea	FALSE
540	37	A2	779	0.0301529	amac	urea	FALSE
545	37	A2	774	0.0299594	amac	urea	FALSE
550	37	A2	646	0.0250048	amac	urea	FALSE
555	37	A2	575	0.0222566	amac	urea	FALSE
560	37	A2	396	0.015328	amac	urea	FALSE
565	37	A2	305	0.0118057	amac	urea	FALSE
570	37	A2	207	0.00801239	amac	urea	FALSE
575	37	A2	251	0.0097155	amac	urea	FALSE
580	37	A2	165	0.00638668	amac	urea	FALSE
585	37	A2	150	0.00580608	amac	urea	FALSE
590	37	A2	125	0.0048384	amac	urea	FALSE
595	37	A2	87	0.00336753	amac	urea	FALSE
600	37	A2	59	0.00228372	amac	urea	FALSE
605	37	A2	65	0.00251597	amac	urea	FALSE
610	37	A2	62	0.00239984	amac	urea	FALSE
615	37	A2	-45	-0.00174182	amac	urea	FALSE
620	37	A2	57	0.00220631	amac	urea	FALSE
625	37	A2	112	0.0043352	amac	urea	FALSE
630	37	A2	-13	-0.000503193	amac	urea	FALSE
635	37	A2	0	0	amac	urea	FALSE
640	37	A2	155	0.00599961	amac	urea	FALSE
645	37	A2	13	0.000503193	amac	urea	FALSE
650	37	A2	56	0.0021676	amac	urea	FALSE
655	37	A2	233	0.00901877	amac	urea	FALSE
660	37	A2	-269	-0.0104122	amac	urea	FALSE
665	37	A2	49	0.00189665	amac	urea	FALSE
670	37	A2	-126	-0.0048771	amac	urea	FALSE
675	37	A2	145	0.00561254	amac	urea	FALSE
680	37	A2	97	0.0037546	amac	urea	FALSE
685	37	A2	391	0.0151345	amac	urea	FALSE
690	37	A2	-42	-0.0016257	amac	urea	FALSE
695	37	A2	0	0	amac	urea	FALSE
700	37	A2	733	0.0283724	amac	urea	FALSE
450	38	A2	27	0.00104509	amac	urea	FALSE
455	38	A2	-5	-0.000193536	amac	urea	FALSE
460	38	A2	-10	-0.000387072	amac	urea	FALSE
465	38	A2	16	0.000619315	amac	urea	FALSE
470	38	A2	-6	-0.000232243	amac	urea	FALSE
475	38	A2	-22	-0.000851558	amac	urea	FALSE
480	38	A2	20	0.000774144	amac	urea	FALSE
485	38	A2	134	0.00518676	amac	urea	FALSE
490	38	A2	301	0.0116509	amac	urea	FALSE
495	38	A2	736	0.0284885	amac	urea	FALSE
500	38	A2	1118	0.0432746	amac	urea	FALSE
505	38	A2	1584	0.0613122	amac	urea	FALSE
510	38	A2	1842	0.0712986	amac	urea	TRUE
515	38	A2	1781	0.0689375	amac	urea	FALSE
520	38	A2	1593	0.0616605	amac	urea	FALSE
525	38	A2	1263	0.0488872	amac	urea	FALSE
530	38	A2	979	0.0378943	amac	urea	FALSE
535	38	A2	817	0.0316238	amac	urea	FALSE
540	38	A2	791	0.0306174	amac	urea	FALSE
545	38	A2	619	0.0239597	amac	urea	FALSE
550	38	A2	627	0.0242694	amac	urea	FALSE
555	38	A2	468	0.018115	amac	urea	FALSE
560	38	A2	384	0.0148636	amac	urea	FALSE
565	38	A2	323	0.0125024	amac	urea	FALSE
570	38	A2	249	0.00963809	amac	urea	FALSE
575	38	A2	170	0.00658022	amac	urea	FALSE
580	38	A2	134	0.00518676	amac	urea	FALSE
585	38	A2	166	0.00642539	amac	urea	FALSE
590	38	A2	145	0.00561254	amac	urea	FALSE
595	38	A2	106	0.00410296	amac	urea	FALSE
600	38	A2	55	0.0021289	amac	urea	FALSE
605	38	A2	50	0.00193536	amac	urea	FALSE
610	38	A2	29	0.00112251	amac	urea	FALSE
615	38	A2	46	0.00178053	amac	urea	FALSE
620	38	A2	-8	-0.000309657	amac	urea	FALSE
625	38	A2	17	0.000658022	amac	urea	FALSE
630	38	A2	-40	-0.00154829	amac	urea	FALSE
635	38	A2	70	0.0027095	amac	urea	FALSE
640	38	A2	100	0.00387072	amac	urea	FALSE
645	38	A2	-115	-0.00445133	amac	urea	FALSE
650	38	A2	-45	-0.00174182	amac	urea	FALSE
655	38	A2	45	0.00174182	amac	urea	FALSE
660	38	A2	140	0.00541901	amac	urea	FALSE
665	38	A2	158	0.00611573	amac	urea	FALSE
670	38	A2	246	0.00952197	amac	urea	FALSE
675	38	A2	-265	-0.0102574	amac	urea	FALSE
680	38	A2	391	0.0151345	amac	urea	FALSE
685	38	A2	-34	-0.00131604	amac	urea	FALSE
690	38	A2	10	0.000387072	amac	urea	FALSE
695	38	A2	-24	-0.000928972	amac	urea	FALSE
700	38	A2	0	0	amac	urea	FALSE
450	39	A2	33	0.00127734	amac	urea	FALSE
455	39	A2	4	0.000154829	amac	urea	FALSE
460	39	A2	13	0.000503193	amac	urea	FALSE
465	39	A2	72	0.00278692	amac	urea	FALSE
470	39	A2	141	0.00545771	amac	urea	FALSE
475	39	A2	43	0.00166441	amac	urea	FALSE
480	39	A2	137	0.00530288	amac	urea	FALSE
485	39	A2	214	0.00828334	amac	urea	FALSE
490	39	A2	448	0.0173408	amac	urea	FALSE
495	39	A2	729	0.0282175	amac	urea	FALSE
[truncated: 561,041+ more rows]
