# Supplementary material for: Heterogeneity of the GFP fitness landscape and data-driven protein design
Source: eLife. 2022 May 5;11:e75842. doi: 10.7554/eLife.75842 (PMC9119679; doi:10.7554/eLife.75842)
Supplement: Source data 7. [file elife-75842-data7.xlsx]

## Sheet: cd_spectra
	nm	value_normed	abs	gene	temp
122	260	0.216415	290.965	cgre	30
123	259	0.176304	291.709	cgre	30
124	258	0.155133	292.45	cgre	30
125	257	0.07324	293.159	cgre	30
126	256	0.087129	293.88	cgre	30
127	255	0.089836	294.592	cgre	30
128	254	0.101246	295.287	cgre	30
129	253	0.090462	295.965	cgre	30
130	252	0.054419	296.645	cgre	30
131	251	0.053127	297.352	cgre	30
132	250	0.080215	298.038	cgre	30
133	249	0.049504	298.713	cgre	30
134	248	0.08753	299.442	cgre	30
135	247	0.082865	300.212	cgre	30
136	246	0.068668	301.042	cgre	30
137	245	0.059698	301.898	cgre	30
138	244	0.092	302.803	cgre	30
139	243	0.077049	303.806	cgre	30
140	242	0.129573	304.943	cgre	30
141	241	0.095045	306.209	cgre	30
142	240	0.179251	307.653	cgre	30
143	239	0.269433	309.267	cgre	30
144	238	0.333738	311.037	cgre	30
145	237	0.305046	312.956	cgre	30
146	236	0.158048	315.014	cgre	30
147	235	0.017625	317.234	cgre	30
148	234	-0.208827	319.6	cgre	30
149	233	-0.457034	322.119	cgre	30
150	232	-0.982485	324.684	cgre	30
151	231	-1.51665	327.415	cgre	30
152	230	-2.10276	330.456	cgre	30
153	229	-2.57582	333.897	cgre	30
154	228	-3.04451	337.901	cgre	30
155	227	-3.48851	342.47	cgre	30
156	226	-3.98976	347.759	cgre	30
157	225	-4.43775	353.856	cgre	30
158	224	-4.86581	360.743	cgre	30
159	223	-5.2385	368.453	cgre	30
160	222	-5.59019	376.986	cgre	30
161	221	-5.94312	386.391	cgre	30
162	220	-6.01398	396.704	cgre	30
163	219	-6.13997	407.819	cgre	30
164	218	-6.13835	419.554	cgre	30
165	217	-6.35922	431.708	cgre	30
166	216	-6.27822	444.262	cgre	30
167	215	-6.24653	457.135	cgre	30
168	214	-5.9654	470.413	cgre	30
169	213	-5.48676	484.029	cgre	30
170	212	-5.60797	497.828	cgre	30
171	211	-5.19376	511.838	cgre	30
172	210	-5.02545	525.911	cgre	30
173	209	-4.16666	540.406	cgre	30
174	208	-2.92156	555.424	cgre	30
175	207	-1.68684	571.416	cgre	30
176	206	-0.92397	588.767	cgre	30
177	205	-0.587017	608.124	cgre	30
178	204	-0.254519	630.847	cgre	30
179	203	0.746019	658.893	cgre	30
180	202	1.85662	695.277	cgre	30
181	201	2.83023	743.498	cgre	30
182	200	2.81064	808.058	cgre	30
183	260	0.0033	301.022	cgre	98
184	259	0.0379914	301.903	cgre	98
185	258	0.0485922	302.768	cgre	98
186	257	0.0105176	303.602	cgre	98
187	256	-0.0574049	304.423	cgre	98
188	255	-0.0784833	305.234	cgre	98
189	254	-0.0630059	306.014	cgre	98
190	253	-0.0385363	306.783	cgre	98
191	252	-0.0961398	307.528	cgre	98
192	251	-0.143229	308.289	cgre	98
193	250	-0.148557	309.027	cgre	98
194	249	-0.16872	309.752	cgre	98
195	248	-0.254535	310.503	cgre	98
196	247	-0.215778	311.288	cgre	98
197	246	-0.163445	312.122	cgre	98
198	245	-0.135828	312.97	cgre	98
199	244	-0.164765	313.863	cgre	98
200	243	-0.316696	314.83	cgre	98
201	242	-0.293654	315.913	cgre	98
202	241	-0.231932	317.107	cgre	98
203	240	-0.261906	318.407	cgre	98
204	239	-0.382772	319.816	cgre	98
205	238	-0.400666	321.376	cgre	98
206	237	-0.450153	323.057	cgre	98
207	236	-0.502564	324.874	cgre	98
208	235	-0.491529	326.831	cgre	98
209	234	-0.506192	328.934	cgre	98
210	233	-0.412145	331.237	cgre	98
211	232	-0.499964	333.71	cgre	98
212	231	-0.579815	336.511	cgre	98
213	230	-0.725414	339.77	cgre	98
214	229	-0.716989	343.591	cgre	98
215	228	-0.640436	348.091	cgre	98
216	227	-0.516455	353.2	cgre	98
217	226	-0.41049	359.062	cgre	98
218	225	-0.47152	365.709	cgre	98
219	224	-0.542307	373.191	cgre	98
220	223	-0.609954	381.505	cgre	98
221	222	-0.581805	390.694	cgre	98
222	221	-0.272974	400.831	cgre	98
223	220	-0.337865	411.814	cgre	98
224	219	-0.520593	423.591	cgre	98
225	218	-0.786098	436.078	cgre	98
226	217	-0.746079	449.228	cgre	98
227	216	-0.691928	462.976	cgre	98
228	215	-0.54215	477.458	cgre	98
229	214	-0.318057	492.9	cgre	98
230	213	-0.519187	509.621	cgre	98
231	212	-0.689588	527.963	cgre	98
232	211	-1.24521	548.483	cgre	98
233	210	-0.882072	572.366	cgre	98
234	209	-0.839365	601.103	cgre	98
235	208	-1.21478	636.918	cgre	98
236	207	-0.8235	683.577	cgre	98
237	206	-0.262934	745.469	cgre	98
238	205	0.7615	827.431	cgre	98
239	204	-0.0327746	904.244	cgre	98
240	203	-1.08542	958.083	cgre	98
241	202	-1.38227	981.237	cgre	98
242	201	-0.221484	981.907	cgre	98
243	200	-1.51467	981.844	cgre	98
244	260	0.074261	291.865	pplu	30
245	259	0.104248	292.655	pplu	30
246	258	0.128423	293.439	pplu	30
247	257	0.065941	294.192	pplu	30
248	256	0.053864	294.946	pplu	30
249	255	0.002961	295.681	pplu	30
250	254	0.031362	296.415	pplu	30
251	253	0.063082	297.138	pplu	30
252	252	0.109393	297.864	pplu	30
253	251	0.068621	298.593	pplu	30
254	250	0.077959	299.314	pplu	30
255	249	-0.025957	300.013	pplu	30
256	248	-0.061999	300.768	pplu	30
257	247	-0.067589	301.569	pplu	30
258	246	-0.043403	302.43	pplu	30
259	245	0.013323	303.309	pplu	30
260	244	0.016161	304.214	pplu	30
261	243	0.01769	305.211	pplu	30
262	242	0.021793	306.307	pplu	30
263	241	-0.051308	307.513	pplu	30
264	240	-0.127252	308.837	pplu	30
265	239	-0.205926	310.273	pplu	30
266	238	-0.237639	311.82	pplu	30
267	237	-0.333266	313.439	pplu	30
268	236	-0.498385	315.128	pplu	30
269	235	-0.612562	316.901	pplu	30
270	234	-0.657679	318.766	pplu	30
271	233	-0.672487	320.73	pplu	30
272	232	-0.812837	322.738	pplu	30
273	231	-0.942353	324.922	pplu	30
274	230	-1.14159	327.403	pplu	30
275	229	-1.22856	330.245	pplu	30
276	228	-1.33912	333.543	pplu	30
277	227	-1.42348	337.272	pplu	30
278	226	-1.52834	341.523	pplu	30
279	225	-1.69832	346.354	pplu	30
280	224	-1.82557	351.752	pplu	30
281	223	-2.04337	357.722	pplu	30
282	222	-2.13723	364.3	pplu	30
283	221	-2.11005	371.512	pplu	30
284	220	-2.06248	379.307	pplu	30
285	219	-2.06155	387.652	pplu	30
286	218	-1.96244	396.41	pplu	30
287	217	-1.89134	405.485	pplu	30
288	216	-1.60441	414.812	pplu	30
289	215	-1.43613	424.344	pplu	30
290	214	-1.04794	434.151	pplu	30
291	213	-0.751779	444.168	pplu	30
292	212	-0.747789	454.412	pplu	30
293	211	-0.303656	464.854	pplu	30
294	210	0.19329	475.451	pplu	30
295	209	1.3832	486.377	pplu	30
296	208	2.83232	497.694	pplu	30
297	207	4.2383	509.76	pplu	30
298	206	5.00521	522.875	pplu	30
299	205	5.75368	537.793	pplu	30
300	204	6.06987	555.541	pplu	30
301	203	6.6718	577.931	pplu	30
302	202	6.46549	607.564	pplu	30
303	201	6.31298	648.332	pplu	30
304	200	5.94009	706.207	pplu	30
305	260	0.063726	298.998	pplu	98
306	259	0.0524804	299.866	pplu	98
307	258	0.0581102	300.743	pplu	98
308	257	0.0236236	301.596	pplu	98
309	256	-0.0415649	302.442	pplu	98
310	255	-0.0572613	303.269	pplu	98
311	254	-0.0703929	304.065	pplu	98
312	253	-0.0005813	304.879	pplu	98
313	252	0.0020292	305.687	pplu	98
314	251	-0.00907	306.506	pplu	98
315	250	-0.0684204	307.29	pplu	98
316	249	-0.0806757	308.068	pplu	98
317	248	-0.106813	308.891	pplu	98
318	247	-0.0375344	309.758	pplu	98
319	246	-0.0451824	310.668	pplu	98
320	245	-0.0660586	311.585	pplu	98
321	244	-0.160219	312.537	pplu	98
322	243	-0.24364	313.557	pplu	98
323	242	-0.201172	314.681	pplu	98
324	241	-0.132193	315.917	pplu	98
325	240	-0.145039	317.262	pplu	98
326	239	-0.176195	318.719	pplu	98
327	238	-0.165308	320.279	pplu	98
328	237	-0.139771	321.93	pplu	98
329	236	-0.211473	323.661	pplu	98
330	235	-0.22765	325.502	pplu	98
331	234	-0.15045	327.487	pplu	98
332	233	-0.0125519	329.611	pplu	98
333	232	0.0182651	331.867	pplu	98
334	231	-0.0308629	334.344	pplu	98
335	230	-0.0175201	337.216	pplu	98
336	229	0.10089	340.514	pplu	98
337	228	0.142232	344.31	pplu	98
338	227	0.257364	348.542	pplu	98
339	226	0.226133	353.29	pplu	98
340	225	0.205618	358.646	pplu	98
341	224	0.15604	364.609	pplu	98
342	223	0.150728	371.169	pplu	98
343	222	0.247269	378.361	pplu	98
344	221	0.425079	386.212	pplu	98
345	220	0.297664	394.683	pplu	98
346	219	0.228609	403.774	pplu	98
347	218	0.144653	413.404	pplu	98
348	217	0.400905	423.558	pplu	98
349	216	0.389018	434.147	pplu	98
350	215	0.469646	445.379	pplu	98
351	214	0.571941	457.442	pplu	98
352	213	0.47625	470.729	pplu	98
353	212	0.736976	485.642	pplu	98
354	211	0.783372	502.727	pplu	98
355	210	1.07267	522.921	pplu	98
356	209	0.907953	547.66	pplu	98
357	208	0.578695	579.08	pplu	98
358	207	0.721191	620.488	pplu	98
359	206	1.49186	676.493	pplu	98
360	205	1.73597	753.892	pplu	98
361	204	1.32943	848.702	pplu	98
362	203	0.507659	925.051	pplu	98
363	202	0.11798	972.198	pplu	98
364	201	0.0566778	981.922	pplu	98
365	200	-0.155818	982.179	pplu	98
366	260	0.181687	292.365	amac	30
367	259	0.175037	293.138	amac	30
368	258	0.134694	293.886	amac	30
369	257	0.083177	294.622	amac	30
370	256	0.103089	295.36	amac	30
371	255	0.045502	296.076	amac	30
372	254	0.041654	296.778	amac	30
373	253	0.036095	297.467	amac	30
374	252	0.073176	298.162	amac	30
375	251	0.090257	298.869	amac	30
376	250	0.145944	299.557	amac	30
377	249	0.110138	300.234	amac	30
378	248	0.082733	300.957	amac	30
379	247	0.050013	301.717	amac	30
380	246	0.014221	302.527	amac	30
381	245	0.001121	303.354	amac	30
382	244	0.03569	304.231	amac	30
383	243	0.034966	305.211	amac	30
384	242	-0.018793	306.279	amac	30
385	241	-0.111882	307.474	amac	30
386	240	-0.204456	308.8	amac	30
387	239	-0.272192	310.276	amac	30
388	238	-0.397132	311.881	amac	30
389	237	-0.503387	313.634	amac	30
390	236	-0.601675	315.536	amac	30
391	235	-0.609867	317.592	amac	30
392	234	-0.70788	319.763	amac	30
393	233	-0.856044	322.061	amac	30
394	232	-1.11067	324.451	amac	30
395	231	-1.32085	327.05	amac	30
396	230	-1.61643	329.985	amac	30
397	229	-1.85104	333.341	amac	30
398	228	-2.09405	337.263	amac	30
399	227	-2.40467	341.715	amac	30
400	226	-2.69208	346.863	amac	30
401	225	-2.98431	352.752	amac	30
402	224	-3.23726	359.368	amac	30
403	223	-3.41598	366.729	amac	30
404	222	-3.65026	374.82	amac	30
405	221	-3.75462	383.738	amac	30
406	220	-3.84292	393.423	amac	30
407	219	-4.00375	403.815	amac	30
408	218	-4.18837	414.716	amac	30
409	217	-4.07096	426.148	amac	30
410	216	-3.94924	437.904	amac	30
411	215	-3.63604	450.055	amac	30
412	214	-3.31563	462.525	amac	30
413	213	-3.13153	475.272	amac	30
414	212	-3.23156	488.306	amac	30
415	211	-2.81912	501.62	amac	30
416	210	-2.40486	515.118	amac	30
417	209	-1.60276	528.963	amac	30
418	208	-0.642006	543.273	amac	30
419	207	0.248598	558.484	amac	30
420	206	1.45212	575.242	amac	30
421	205	2.2019	594.042	amac	30
422	204	3.08693	616.342	amac	30
423	203	4.28783	643.994	amac	30
424	202	4.97141	680.001	amac	30
425	201	5.10645	728.156	amac	30
426	200	4.68389	794.031	amac	30
427	260	0.093927	299.495	amac	98
428	259	0.119421	300.345	amac	98
429	258	0.0832872	301.174	amac	98
430	257	0.0261566	301.989	amac	98
431	256	-0.0354019	302.798	amac	98
432	255	-0.0407133	303.594	amac	98
433	254	-0.0347129	304.364	amac	98
434	253	-0.0311353	305.128	amac	98
435	252	0.0254152	305.913	amac	98
436	251	0.031306	306.696	amac	98
437	250	0.0336326	307.449	amac	98
438	249	-0.0197707	308.169	amac	98
439	248	-0.13233	308.927	amac	98
440	247	-0.141182	309.728	amac	98
441	246	-0.114307	310.6	amac	98
442	245	-0.0980406	311.478	amac	98
443	244	-0.190684	312.387	amac	98
444	243	-0.277093	313.376	amac	98
445	242	-0.282324	314.461	amac	98
446	241	-0.319899	315.664	amac	98
447	240	-0.357717	317.003	amac	98
448	239	-0.431024	318.464	amac	98
449	238	-0.444677	320.056	amac	98
450	237	-0.476535	321.756	amac	98
451	236	-0.589857	323.567	amac	98
452	235	-0.577765	325.529	amac	98
453	234	-0.571175	327.644	amac	98
454	233	-0.475705	329.947	amac	98
455	232	-0.531082	332.412	amac	98
456	231	-0.604066	335.169	amac	98
457	230	-0.655664	338.383	amac	98
458	229	-0.660134	342.089	amac	98
459	228	-0.672412	346.421	amac	98
460	227	-0.680876	351.296	amac	98
461	226	-0.666291	356.876	amac	98
462	225	-0.726435	363.201	amac	98
463	224	-0.846383	370.266	amac	98
464	223	-0.839326	378.126	amac	98
465	222	-0.865466	386.768	amac	98
466	221	-0.59136	396.293	amac	98
467	220	-0.651378	406.598	amac	98
468	219	-0.590104	417.685	amac	98
469	218	-0.537298	429.427	amac	98
470	217	-0.505265	441.734	amac	98
471	216	-0.498892	454.616	amac	98
472	215	-0.463021	468.206	amac	98
473	214	-0.210473	482.793	amac	98
474	213	-0.523267	498.616	amac	98
475	212	-0.484774	516.187	amac	98
476	211	-0.978777	535.944	amac	98
477	210	-0.379296	559.173	amac	98
478	209	-0.357148	587.24	amac	98
479	208	-0.686082	622.442	amac	98
480	207	-0.371281	668.416	amac	98
481	206	0.78038	729.88	amac	98
482	205	1.39313	812.37	amac	98
483	204	0.897387	894.001	amac	98
484	203	-0.178764	952.765	amac	98
485	202	-0.620665	980.666	amac	98
486	201	0.775426	982.153	amac	98
487	200	-0.31208	982.103	amac	98
488	260	0.220829	292.53	amacV14L	30
489	259	0.277512	293.321	amacV14L	30
490	258	0.273456	294.083	amacV14L	30
491	257	0.200787	294.814	amacV14L	30
492	256	0.131194	295.527	amacV14L	30
493	255	0.09534	296.24	amacV14L	30
494	254	0.085761	296.933	amacV14L	30
495	253	0.155422	297.635	amacV14L	30
496	252	0.167104	298.319	amacV14L	30
497	251	0.123852	299.017	amacV14L	30
498	250	0.104354	299.696	amacV14L	30
499	249	0.09473	300.386	amacV14L	30
500	248	0.093526	301.12	amacV14L	30
501	247	0.092039	301.886	amacV14L	30
502	246	0.060678	302.699	amacV14L	30
503	245	0.046484	303.531	amacV14L	30
504	244	0.094564	304.415	amacV14L	30
505	243	0.034971	305.375	amacV14L	30
506	242	0.006807	306.445	amacV14L	30
507	241	-0.084798	307.638	amacV14L	30
508	240	-0.109211	308.981	amacV14L	30
509	239	-0.189889	310.449	amacV14L	30
510	238	-0.276661	312.053	amacV14L	30
511	237	-0.367362	313.792	amacV14L	30
512	236	-0.467783	315.665	amacV14L	30
513	235	-0.540687	317.669	amacV14L	30
514	234	-0.655166	319.777	amacV14L	30
515	233	-0.831845	321.979	amacV14L	30
516	232	-1.09527	324.22	amacV14L	30
517	231	-1.38867	326.563	amacV14L	30
518	230	-1.66399	329.144	amacV14L	30
519	229	-1.89942	331.951	amacV14L	30
520	228	-2.14703	335.071	amacV14L	30
521	227	-2.39748	338.417	amacV14L	30
522	226	-2.70175	342.043	amacV14L	30
523	225	-2.98516	346.007	amacV14L	30
524	224	-3.24549	350.275	amacV14L	30
525	223	-3.47151	354.901	amacV14L	30
526	222	-3.51228	359.909	amacV14L	30
527	221	-3.52167	365.301	amacV14L	30
528	220	-3.47772	371.039	amacV14L	30
529	219	-3.7679	377.064	amacV14L	30
530	218	-3.76699	383.429	amacV14L	30
531	217	-3.7525	390.108	amacV14L	30
532	216	-3.49965	397.083	amacV14L	30
533	215	-3.26896	404.372	amacV14L	30
534	214	-3.05583	412.005	amacV14L	30
535	213	-2.77644	420.07	amacV14L	30
536	212	-2.80144	428.652	amacV14L	30
537	211	-2.82307	437.685	amacV14L	30
538	210	-2.4978	447.408	amacV14L	30
539	209	-1.70843	457.959	amacV14L	30
540	208	-0.428437	469.557	amacV14L	30
541	207	0.61169	482.495	amacV14L	30
542	206	1.54916	497.254	amacV14L	30
543	205	2.22496	514.327	amacV14L	30
544	204	2.88205	534.908	amacV14L	30
545	203	4.04749	560.623	amacV14L	30
546	202	4.71432	594.182	amacV14L	30
547	201	5.42893	639.327	amacV14L	30
548	200	5.48901	702.032	amacV14L	30
549	260	0.02513	300.987	amacV14L	98
550	259	0.0135394	301.845	amacV14L	98
551	258	-0.0240708	302.699	amacV14L	98
552	257	-0.0509364	303.538	amacV14L	98
553	256	-0.0492469	304.384	amacV14L	98
554	255	0.0144817	305.218	amacV14L	98
555	254	0.0577361	306.012	amacV14L	98
556	253	0.104039	306.802	amacV14L	98
557	252	0.0552632	307.579	amacV14L	98
558	251	0.077221	308.387	amacV14L	98
559	250	0.0461356	309.155	amacV14L	98
560	249	0.0290433	309.899	amacV14L	98
561	248	-0.0729081	310.667	amacV14L	98
562	247	-0.0971424	311.463	amacV14L	98
563	246	-0.0775054	312.329	amacV14L	98
564	245	-0.110744	313.204	amacV14L	98
565	244	-0.21261	314.117	amacV14L	98
566	243	-0.323292	315.115	amacV14L	98
567	242	-0.296237	316.224	amacV14L	98
568	241	-0.289894	317.434	amacV14L	98
569	240	-0.335823	318.762	amacV14L	98
570	239	-0.43106	320.195	amacV14L	98
571	238	-0.508791	321.739	amacV14L	98
572	237	-0.495228	323.394	amacV14L	98
573	236	-0.582435	325.131	amacV14L	98
574	235	-0.601584	326.965	amacV14L	98
575	234	-0.679976	328.877	amacV14L	98
576	233	-0.637309	330.915	amacV14L	98
577	232	-0.551563	333.057	amacV14L	98
578	231	-0.579625	335.339	amacV14L	98
579	230	-0.570755	337.905	amacV14L	98
580	229	-0.598212	340.708	amacV14L	98
581	228	-0.612947	343.847	amacV14L	98
582	227	-0.523216	347.213	amacV14L	98
583	226	-0.497216	350.877	amacV14L	98
584	225	-0.631719	354.878	amacV14L	98
585	224	-0.756167	359.244	amacV14L	98
586	223	-0.698673	364.021	amacV14L	98
587	222	-0.599847	369.173	amacV14L	98
588	221	-0.349638	374.758	amacV14L	98
589	220	-0.432713	380.735	amacV14L	98
590	219	-0.52399	387.138	amacV14L	98
591	218	-0.671917	393.953	amacV14L	98
592	217	-0.6546	401.182	amacV14L	98
593	216	-0.594359	408.917	amacV14L	98
594	215	-0.566998	417.281	amacV14L	98
595	214	-0.40776	426.584	amacV14L	98
596	213	-0.573728	437.153	amacV14L	98
597	212	-0.610582	449.414	amacV14L	98
598	211	-0.52251	464.052	amacV14L	98
599	210	0.0374664	482.013	amacV14L	98
600	209	0.358713	504.743	amacV14L	98
601	208	0.225978	534.185	amacV14L	98
602	207	-0.0436598	573.379	amacV14L	98
603	206	0.448503	627.015	amacV14L	98
604	205	0.98375	702.039	amacV14L	98
605	204	1.48226	804.119	amacV14L	98
606	203	2.26359	896.304	amacV14L	98
607	202	2.25454	959.758	amacV14L	98
608	201	1.65179	982.428	amacV14L	98
609	200	-0.21906	982.161	amacV14L	98
610	260	0.135922	292.851	av	30
611	259	0.122032	293.647	av	30
612	258	0.123584	294.434	av	30
613	257	0.126971	295.205	av	30
614	256	0.142471	295.959	av	30
615	255	0.15233	296.697	av	30
616	254	0.159618	297.411	av	30
617	253	0.141493	298.102	av	30
618	252	0.134918	298.796	av	30
619	251	0.09691	299.505	av	30
620	250	0.124106	300.201	av	30
621	249	0.113503	300.896	av	30
622	248	0.086058	301.629	av	30
623	247	0.035803	302.397	av	30
624	246	-0.031191	303.22	av	30
625	245	-0.068328	304.069	av	30
626	244	-0.068393	304.971	av	30
627	243	-0.118048	305.972	av	30
628	242	-0.158841	307.082	av	30
629	241	-0.242881	308.334	av	30
630	240	-0.372538	309.724	av	30
631	239	-0.503795	311.282	av	30
632	238	-0.668761	313.001	av	30
633	237	-0.810888	314.903	av	30
634	236	-0.925386	316.992	av	30
635	235	-1.03139	319.236	av	30
636	234	-1.14909	321.621	av	30
637	233	-1.36263	324.129	av	30
638	232	-1.61727	326.736	av	30
639	231	-1.98322	329.501	av	30
640	230	-2.34146	332.597	av	30
641	229	-2.54259	336.096	av	30
642	228	-2.75493	340.095	av	30
643	227	-2.96548	344.573	av	30
644	226	-3.29173	349.628	av	30
645	225	-3.61625	355.345	av	30
646	224	-3.82732	361.722	av	30
647	223	-4.0305	368.748	av	30
648	222	-4.30094	376.424	av	30
649	221	-4.49707	384.834	av	30
650	220	-4.68035	393.927	av	30
651	219	-4.94248	403.67	av	30
652	218	-5.0246	413.945	av	30
653	217	-5.14554	424.671	av	30
654	216	-5.24786	435.763	av	30
655	215	-5.17122	447.307	av	30
656	214	-4.93832	459.288	av	30
657	213	-4.33534	471.819	av	30
658	212	-4.50043	484.695	av	30
659	211	-4.28791	498.062	av	30
660	210	-4.17148	511.911	av	30
661	209	-3.13002	526.616	av	30
662	208	-1.75626	542.26	av	30
663	207	-0.282846	559.319	av	30
664	206	1.02896	578.291	av	30
665	205	1.93658	599.775	av	30
666	204	2.65988	625.195	av	30
667	203	3.93599	656.419	av	30
668	202	4.94177	696.469	av	30
669	201	5.96688	749.05	av	30
670	200	5.37746	818.457	av	30
671	260	-0.020968	295.917	av	98
672	259	-0.0278626	296.752	av	98
673	258	-0.0253108	297.574	av	98
674	257	-0.0611494	298.381	av	98
675	256	-0.12011	299.179	av	98
676	255	-0.108782	299.974	av	98
677	254	-0.116803	300.74	av	98
678	253	-0.0621903	301.518	av	98
679	252	-0.179472	302.263	av	98
680	251	-0.284302	303.016	av	98
681	250	-0.322713	303.762	av	98
682	249	-0.345039	304.507	av	98
683	248	-0.437984	305.298	av	98
684	247	-0.525641	306.116	av	98
685	246	-0.596082	307.014	av	98
686	245	-0.702959	307.943	av	98
687	244	-0.883432	308.935	av	98
688	243	-1.08696	310.026	av	98
689	242	-1.15437	311.241	av	98
690	241	-1.31456	312.572	av	98
691	240	-1.45724	314.084	av	98
692	239	-1.79447	315.738	av	98
693	238	-1.97716	317.603	av	98
694	237	-2.23173	319.616	av	98
695	236	-2.43382	321.829	av	98
696	235	-2.62342	324.22	av	98
697	234	-2.83121	326.813	av	98
698	233	-3.01906	329.62	av	98
699	232	-3.2165	332.662	av	98
700	231	-3.3777	336.035	av	98
701	230	-3.50901	339.863	av	98
702	229	-3.6003	344.186	av	98
703	228	-3.81346	349.071	av	98
704	227	-3.89526	354.503	av	98
705	226	-4.04859	360.569	av	98
706	225	-4.12638	367.377	av	98
707	224	-4.25568	374.919	av	98
708	223	-4.35483	383.225	av	98
709	222	-4.36649	392.348	av	98
710	221	-4.49039	402.259	av	98
711	220	-4.65264	413.043	av	98
712	219	-4.80252	424.616	av	98
713	218	-4.82631	436.966	av	98
714	217	-4.72629	450.029	av	98
715	216	-4.9275	463.77	av	98
716	215	-4.96726	478.493	av	98
717	214	-4.78843	494.513	av	98
718	213	-5.159	512.142	av	98
719	212	-5.00844	532.038	av	98
720	211	-5.31487	554.72	av	98
721	210	-5.0049	581.549	av	98
722	209	-4.66629	614.374	av	98
723	208	-4.96156	655.494	av	98
724	207	-4.68013	708.896	av	98
725	206	-3.78383	779.094	av	98
726	205	-2.68373	862.874	av	98
727	204	-1.98722	930.315	av	98
728	203	-1.75222	971.84	av	98
729	202	-0.932869	981.701	av	98
730	201	-0.120556	981.845	av	98
731	200	-0.133785	982.115	av	98

## Sheet: cd_melting_curves
	temperature	value	abs	gene	nm
0	29.99	-5.50492	419.152	cgre	218
1	30.16	-6.10476	418.971	cgre	218
2	30.45	-5.50369	419.124	cgre	218
3	30.65	-5.94254	419.012	cgre	218
4	30.79	-6.03868	419.015	cgre	218
5	31.02	-5.3366	419.238	cgre	218
6	31.22	-5.55106	419.204	cgre	218
7	31.37	-5.55783	419.235	cgre	218
8	31.49	-5.9981	419.145	cgre	218
9	31.68	-5.66006	419.229	cgre	218
10	31.88	-5.97105	419.196	cgre	218
11	32.06	-5.64164	419.325	cgre	218
12	32.18	-6.07393	419.232	cgre	218
13	32.36	-5.81859	419.346	cgre	218
14	32.6	-6.11953	419.273	cgre	218
15	32.78	-5.79177	419.406	cgre	218
16	32.89	-5.85953	419.422	cgre	218
17	33.07	-5.66649	419.49	cgre	218
18	33.3	-5.79963	419.483	cgre	218
19	33.48	-6.089	419.471	cgre	218
20	33.59	-5.8955	419.55	cgre	218
21	33.82	-5.8816	419.625	cgre	218
22	33.98	-6.07967	419.541	cgre	218
23	34.15	-5.68513	419.723	cgre	218
24	34.3	-5.8282	419.714	cgre	218
25	34.51	-5.56945	419.803	cgre	218
26	34.71	-5.78977	419.791	cgre	218
27	34.81	-5.57062	419.86	cgre	218
28	34.96	-5.6055	419.894	cgre	218
29	35.19	-5.57325	419.946	cgre	218
30	35.43	-5.82526	419.914	cgre	218
31	35.55	-5.994	419.925	cgre	218
32	35.69	-5.85372	419.961	cgre	218
33	35.9	-5.80187	420.034	cgre	218
34	36.13	-5.9423	420.027	cgre	218
35	36.33	-5.57844	420.152	cgre	218
36	36.41	-5.45947	420.212	cgre	218
37	36.54	-5.79458	420.173	cgre	218
38	36.78	-5.88408	420.134	cgre	218
39	36.98	-5.76008	420.209	cgre	218
40	37.09	-5.64976	420.272	cgre	218
41	37.29	-5.60515	420.325	cgre	218
42	37.5	-5.41563	420.402	cgre	218
43	37.73	-5.68915	420.353	cgre	218
44	37.85	-5.20197	420.522	cgre	218
45	37.97	-6.041	420.306	cgre	218
46	38.19	-6.03495	420.35	cgre	218
47	38.33	-6.01599	420.384	cgre	218
48	38.48	-5.80174	420.468	cgre	218
49	38.71	-5.5847	420.549	cgre	218
50	38.92	-5.91959	420.509	cgre	218
51	39.12	-5.67339	420.612	cgre	218
52	39.2	-5.91358	420.565	cgre	218
53	39.4	-5.83953	420.579	cgre	218
54	39.61	-5.40604	420.745	cgre	218
55	39.79	-5.94073	420.603	cgre	218
56	39.91	-5.79637	420.618	cgre	218
57	40.09	-5.83139	420.613	cgre	218
58	40.31	-5.75226	420.647	cgre	218
59	40.49	-5.70751	420.65	cgre	218
60	40.61	-5.49086	420.775	cgre	218
61	40.8	-5.20971	420.874	cgre	218
62	41.01	-5.78701	420.746	cgre	218
63	41.22	-5.65297	420.808	cgre	218
64	41.36	-5.54266	420.853	cgre	218
65	41.6	-5.64833	420.858	cgre	218
66	41.82	-5.83921	420.858	cgre	218
67	41.99	-5.3511	420.99	cgre	218
68	42.07	-5.3991	420.995	cgre	218
69	42.28	-6.08065	420.854	cgre	218
70	42.49	-5.41113	421.039	cgre	218
71	42.57	-5.51802	421.009	cgre	218
72	42.79	-5.18555	421.123	cgre	218
73	43.05	-5.61343	421.054	cgre	218
74	43.24	-5.33142	421.151	cgre	218
75	43.37	-5.52246	421.123	cgre	218
76	43.49	-5.6784	421.074	cgre	218
77	43.72	-5.32676	421.224	cgre	218
78	43.88	-5.75599	421.125	cgre	218
79	44.04	-5.52978	421.222	cgre	218
80	44.18	-5.6241	421.235	cgre	218
81	44.42	-5.69493	421.245	cgre	218
82	44.51	-5.29513	421.397	cgre	218
83	44.94	-5.47513	421.353	cgre	218
84	45.19	-6.05887	421.246	cgre	218
85	45.23	-5.34427	421.456	cgre	218
86	45.41	-5.15021	421.545	cgre	218
87	45.61	-5.71453	421.407	cgre	218
88	45.82	-5.93208	421.376	cgre	218
89	45.92	-5.85634	421.432	cgre	218
90	46.09	-5.97325	421.44	cgre	218
91	46.33	-5.68223	421.54	cgre	218
92	46.52	-5.37009	421.651	cgre	218
93	46.67	-5.23029	421.694	cgre	218
94	46.74	-5.17299	421.743	cgre	218
95	46.98	-5.76735	421.645	cgre	218
96	47.24	-5.46807	421.772	cgre	218
97	47.4	-5.53237	421.747	cgre	218
98	47.52	-5.76791	421.747	cgre	218
99	47.66	-4.99241	421.953	cgre	218
100	47.85	-5.63202	421.816	cgre	218
101	48.03	-5.41122	421.918	cgre	218
102	48.19	-5.26054	421.999	cgre	218
103	48.44	-5.6905	421.898	cgre	218
104	48.61	-5.61846	421.931	cgre	218
105	48.71	-5.12975	422.1	cgre	218
106	48.9	-4.94178	422.137	cgre	218
107	49.12	-5.95391	421.944	cgre	218
108	49.3	-5.41755	422.123	cgre	218
109	49.46	-5.57993	422.081	cgre	218
110	49.61	-5.61485	422.114	cgre	218
111	49.8	-5.82345	422.079	cgre	218
112	49.98	-5.63138	422.181	cgre	218
113	50.22	-5.42615	422.283	cgre	218
114	50.32	-5.05941	422.399	cgre	218
115	50.45	-4.87673	422.444	cgre	218
116	50.71	-5.35898	422.396	cgre	218
117	50.95	-5.41599	422.417	cgre	218
118	51.01	-5.5545	422.404	cgre	218
119	51.15	-5.8072	422.323	cgre	218
120	51.4	-5.10582	422.579	cgre	218
121	51.65	-5.33546	422.52	cgre	218
122	51.73	-5.574	422.517	cgre	218
123	51.88	-5.221	422.646	cgre	218
124	52.08	-5.34724	422.62	cgre	218
125	52.31	-5.08243	422.741	cgre	218
126	52.42	-5.55124	422.649	cgre	218
127	52.59	-5.61668	422.666	cgre	218
128	52.82	-5.87574	422.644	cgre	218
129	52.98	-5.73753	422.732	cgre	218
130	53.1	-5.48158	422.822	cgre	218
131	53.27	-5.64861	422.83	cgre	218
132	53.51	-4.7045	423.088	cgre	218
133	53.72	-5.804	422.856	cgre	218
134	53.83	-5.4977	422.955	cgre	218
135	53.98	-5.63255	422.958	cgre	218
136	54.17	-5.80954	422.926	cgre	218
137	54.35	-5.39997	423.059	cgre	218
138	54.54	-4.79429	423.228	cgre	218
139	54.7	-5.46437	423.103	cgre	218
140	54.91	-5.68947	423.073	cgre	218
141	55.14	-5.97272	423.036	cgre	218
142	55.21	-5.85674	423.068	cgre	218
143	55.33	-5.91835	423.101	cgre	218
144	55.62	-5.08458	423.338	cgre	218
145	55.85	-5.34001	423.278	cgre	218
146	55.91	-5.68091	423.232	cgre	218
147	56.09	-5.27423	423.35	cgre	218
148	56.27	-5.44069	423.323	cgre	218
149	56.5	-5.60745	423.317	cgre	218
150	56.63	-5.61327	423.307	cgre	218
151	56.74	-5.28607	423.409	cgre	218
152	57.03	-5.55084	423.387	cgre	218
153	57.23	-5.66881	423.371	cgre	218
154	57.32	-5.39654	423.466	cgre	218
155	57.52	-5.37146	423.491	cgre	218
156	57.72	-4.99719	423.57	cgre	218
157	57.9	-5.30325	423.58	cgre	218
158	57.99	-5.55044	423.542	cgre	218
159	58.2	-5.42118	423.595	cgre	218
160	58.41	-5.41387	423.575	cgre	218
161	58.58	-5.26153	423.664	cgre	218
162	58.64	-5.01833	423.779	cgre	218
163	58.89	-4.83687	423.335	cgre	218
164	59.13	-5.42529	423.201	cgre	218
165	59.26	-5.89323	423.124	cgre	218
166	59.42	-5.39731	423.271	cgre	218
167	59.73	-5.7124	423.168	cgre	218
168	60	-5.56988	423.262	cgre	218
169	60.44	-5.50013	423.364	cgre	218
170	60.54	-5.10224	423.463	cgre	218
171	60.6	-5.63674	423.311	cgre	218
172	60.81	-5.68229	423.344	cgre	218
173	60.98	-5.4205	423.451	cgre	218
174	61.13	-5.50421	423.409	cgre	218
175	61.25	-5.25426	423.51	cgre	218
176	61.52	-5.46178	423.47	cgre	218
177	61.71	-5.69064	423.411	cgre	218
178	61.94	-5.31587	423.55	cgre	218
179	62.02	-5.39803	423.547	cgre	218
180	62.19	-5.34202	423.613	cgre	218
181	62.41	-5.40727	423.616	cgre	218
182	62.61	-5.53955	423.605	cgre	218
183	62.72	-5.3593	423.646	cgre	218
184	62.86	-5.58831	423.619	cgre	218
185	63.1	-5.40066	423.691	cgre	218
186	63.35	-5.15956	423.799	cgre	218
187	63.41	-5.41923	423.747	cgre	218
188	63.58	-5.60437	423.724	cgre	218
189	63.83	-5.44744	423.817	cgre	218
190	64.04	-5.41459	423.843	cgre	218
191	64.14	-5.08573	423.924	cgre	218
192	64.29	-4.94885	423.986	cgre	218
193	64.51	-4.42921	424.148	cgre	218
194	64.65	-5.54346	423.869	cgre	218
195	64.78	-5.06651	424.014	cgre	218
196	65.01	-5.23785	424.04	cgre	218
197	65.22	-4.928	424.145	cgre	218
198	65.44	-5.14255	424.093	cgre	218
199	65.56	-5.56421	423.985	cgre	218
200	65.64	-5.33367	424.115	cgre	218
201	65.88	-5.59555	424.054	cgre	218
202	66.13	-5.43292	424.14	cgre	218
203	66.31	-5.61748	424.085	cgre	218
204	66.45	-5.27906	424.214	cgre	218
205	66.73	-5.51256	424.182	cgre	218
206	66.95	-5.62096	424.2	cgre	218
207	67.03	-5.29405	424.324	cgre	218
208	67.21	-4.71348	424.543	cgre	218
209	67.4	-5.29307	424.425	cgre	218
210	67.56	-5.17652	424.56	cgre	218
211	67.69	-5.21	424.676	cgre	218
212	67.89	-5.75972	424.656	cgre	218
213	68.13	-4.98891	424.993	cgre	218
214	68.31	-5.57489	425.099	cgre	218
215	68.42	-4.87801	425.508	cgre	218
216	68.58	-5.5572	425.675	cgre	218
217	68.8	-4.6744	426.212	cgre	218
218	68.96	-5.27167	426.421	cgre	218
219	69.06	-5.10504	426.877	cgre	218
220	69.29	-5.08955	427.347	cgre	218
221	69.56	-5.07786	427.845	cgre	218
222	69.7	-4.21785	428.606	cgre	218
223	69.8	-4.80209	429.05	cgre	218
224	70	-3.97919	429.818	cgre	218
225	70.22	-4.24971	430.37	cgre	218
226	70.44	-3.80731	431.092	cgre	218
227	70.5	-4.36884	431.594	cgre	218
228	70.68	-3.67332	432.378	cgre	218
229	70.87	-3.12997	433.105	cgre	218
230	71.13	-3.2315	433.707	cgre	218
231	71.23	-3.1152	434.336	cgre	218
232	71.36	-2.5802	434.976	cgre	218
233	71.63	-2.5929	435.452	cgre	218
234	71.76	-1.7989	435.971	cgre	218
235	71.91	-2.19738	436.247	cgre	218
236	72.13	-1.22757	436.79	cgre	218
237	72.28	-0.981873	437.026	cgre	218
238	72.49	-1.53681	436.98	cgre	218
239	72.58	-0.85006	437.159	cgre	218
240	72.72	-0.476082	437.182	cgre	218
241	73.03	0.32813	437.263	cgre	218
242	73.3	0.0849079	436.972	cgre	218
243	73.34	-0.123468	436.62	cgre	218
244	73.63	0.343144	436.472	cgre	218
245	73.81	0.156274	436.201	cgre	218
246	73.94	0.822324	436.144	cgre	218
247	74.1	0.219972	435.781	cgre	218
248	74.31	0.848255	435.728	cgre	218
249	74.55	0.87987	435.584	cgre	218
250	74.65	0.416167	435.219	cgre	218
251	75.07	-0.106328	434.852	cgre	218
252	75.31	0.617829	434.776	cgre	218
253	75.71	0.215005	434.559	cgre	218
254	75.85	0.381025	434.519	cgre	218
255	75.95	-0.233507	434.245	cgre	218
256	76.1	0.371042	434.306	cgre	218
257	76.27	0.778513	434.34	cgre	218
258	76.51	0.201489	434.112	cgre	218
259	76.67	0.516858	434.104	cgre	218
260	76.75	0.563385	433.99	cgre	218
261	77	0.305158	433.913	cgre	218
262	77.23	0.283739	433.829	cgre	218
263	77.35	0.240981	433.762	cgre	218
264	77.46	0.0127276	433.704	cgre	218
265	77.74	0.342121	433.705	cgre	218
266	77.92	0.00185036	433.576	cgre	218
267	78.05	-0.0517598	433.487	cgre	218
268	78.34	0.5202	433.569	cgre	218
269	78.52	0.158253	433.47	cgre	218
270	78.73	0.12193	433.412	cgre	218
271	78.82	0.239364	433.38	cgre	218
272	78.95	0.616995	433.458	cgre	218
273	79.2	0.144043	433.315	cgre	218
274	79.39	0.152762	433.261	cgre	218
275	79.46	0.203462	433.246	cgre	218
276	79.7	0.481025	433.29	cgre	218
277	79.89	0.282632	433.267	cgre	218
278	80.17	0.566291	433.301	cgre	218
279	80.21	-0.0621293	433.092	cgre	218
280	80.35	-0.0180893	433.091	cgre	218
281	80.61	0.347116	433.156	cgre	218
282	80.7	-0.262189	432.959	cgre	218
283	80.88	-0.0034058	433.041	cgre	218
284	81.16	-0.166638	433.002	cgre	218
285	81.36	0.169914	433.063	cgre	218
286	81.5	-0.254673	432.913	cgre	218
287	81.57	0.406188	433.049	cgre	218
288	81.79	-0.33712	432.893	cgre	218
289	82.01	0.434187	433.064	cgre	218
290	82.23	0.466443	433.029	cgre	218
291	82.35	-0.216249	432.865	cgre	218
292	82.46	0.287321	432.969	cgre	218
293	82.69	0.345818	433.012	cgre	218
294	82.93	0.114169	432.922	cgre	218
295	83.01	0.357557	432.931	cgre	218
296	83.16	0.00342255	432.849	cgre	218
297	83.38	-0.0314172	432.846	cgre	218
298	83.64	-0.0681338	432.858	cgre	218
299	83.78	0.492474	432.958	cgre	218
300	84.04	-0.422435	432.741	cgre	218
301	84.18	0.254515	432.933	cgre	218
302	84.35	-0.151139	432.784	cgre	218
303	84.52	0.227772	432.89	cgre	218
304	84.79	0.903058	433.068	cgre	218
305	84.91	0.101993	432.844	cgre	218
306	85	0.0443998	432.821	cgre	218
307	85.18	0.276416	432.893	cgre	218
308	85.42	0.371608	432.935	cgre	218
309	85.62	0.169846	432.872	cgre	218
310	85.75	0.380651	432.827	cgre	218
311	85.82	-0.173094	432.737	cgre	218
312	86.14	0.109498	432.825	cgre	218
313	86.31	-0.234688	432.733	cgre	218
314	86.51	-0.12963	432.766	cgre	218
315	86.65	-0.0294106	432.702	cgre	218
316	86.87	-0.36369	432.664	cgre	218
317	87.13	0.199147	432.787	cgre	218
318	87.29	0.536804	432.891	cgre	218
319	87.39	0.309304	432.828	cgre	218
320	87.63	-0.259236	432.704	cgre	218
321	87.8	0.157867	432.805	cgre	218
322	87.87	-0.414632	432.675	cgre	218
323	88.11	-0.474012	432.678	cgre	218
324	88.28	0.283011	432.837	cgre	218
325	88.49	0.323695	432.814	cgre	218
326	88.6	-0.193965	432.661	cgre	218
327	88.74	0.0344958	432.719	cgre	218
328	89.01	-0.345906	432.65	cgre	218
329	89.31	0.453249	432.805	cgre	218
330	89.45	-0.0573289	432.701	cgre	218
331	89.68	-0.304424	432.675	cgre	218
332	89.93	-0.0241623	432.736	cgre	218
333	90.03	0.0734826	432.703	cgre	218
334	90.35	0.376629	432.81	cgre	218
335	90.58	-0.00156128	432.702	cgre	218
336	90.67	-0.716062	432.503	cgre	218
337	90.77	0.0542836	432.758	cgre	218
338	91.02	-0.476878	432.64	cgre	218
339	91.21	0.268878	432.811	cgre	218
340	91.36	-0.233289	432.645	cgre	218
341	91.63	-0.272596	432.675	cgre	218
342	91.83	0.9219	432.985	cgre	218
343	92	-0.271696	432.681	cgre	218
344	92.08	0.0263758	432.749	cgre	218
345	92.26	-0.200721	432.712	cgre	218
346	92.53	0.252251	432.849	cgre	218
347	92.73	-0.147521	432.763	cgre	218
348	92.85	-0.101461	432.731	cgre	218
349	93.17	-0.160377	432.796	cgre	218
350	93.63	-0.371213	432.667	cgre	218
351	93.83	-0.690736	432.638	cgre	218
352	93.97	-0.371748	432.723	cgre	218
353	94.03	-0.0299772	432.799	cgre	218
354	94.33	0.457349	432.952	cgre	218
355	94.61	-0.0626038	432.861	cgre	218
356	94.71	-0.519354	432.74	cgre	218
357	94.81	0.177142	432.911	cgre	218
358	95	-0.604396	432.733	cgre	218
359	95.22	-0.087049	432.815	cgre	218
360	95.32	-0.402719	432.745	cgre	218
361	95.45	0.320892	432.926	cgre	218
362	95.7	-0.123431	432.892	cgre	218
363	95.95	-0.673063	432.733	cgre	218
364	96.08	-0.372783	432.798	cgre	218
365	96.22	-0.0532806	432.885	cgre	218
366	96.42	-0.150971	432.886	cgre	218
367	96.63	-0.168941	432.914	cgre	218
368	96.77	-0.679713	432.768	cgre	218
369	96.96	-0.438174	432.913	cgre	218
370	97.08	-0.179179	433.019	cgre	218
371	97.18	0.343837	433.159	cgre	218
372	97.58	-0.239449	433.015	cgre	218
373	97.64	-0.662093	432.977	cgre	218
374	97.89	0.0363957	433.198	cgre	218
375	98.23	-0.404985	433.111	cgre	218
376	30	-1.50427	395.956	pplu	218
377	30.13	-1.75044	395.891	pplu	218
378	30.46	-1.44842	395.984	pplu	218
379	30.63	-1.60616	395.962	pplu	218
380	30.81	-1.23343	396.05	pplu	218
381	31.01	-1.30702	396.029	pplu	218
382	31.2	-1.4258	396.006	pplu	218
383	31.3	-1.40908	396.027	pplu	218
384	31.47	-1.00592	396.124	pplu	218
385	31.72	-1.65115	395.971	pplu	218
386	31.92	-1.55807	396.032	pplu	218
387	32	-1.55025	396.043	pplu	218
388	32.16	-1.59676	396.028	pplu	218
389	32.38	-1.55834	395.981	pplu	218
390	32.6	-1.56563	395.987	pplu	218
391	32.73	-1.13577	396.11	pplu	218
392	32.85	-1.28442	396.105	pplu	218
393	33.1	-1.69197	396.04	pplu	218
394	33.32	-0.956569	396.208	pplu	218
395	33.4	-1.5868	396.094	pplu	218
396	33.59	-1.09789	396.201	pplu	218
397	33.8	-1.79313	396.05	pplu	218
398	34.02	-1.24205	396.176	pplu	218
399	34.11	-2.01324	395.991	pplu	218
400	34.26	-1.60856	396.08	pplu	218
401	34.48	-1.44048	396.144	pplu	218
402	34.71	-1.7569	396.101	pplu	218
403	34.82	-1.611	396.14	pplu	218
404	34.97	-1.29464	396.266	pplu	218
405	35.21	-1.47995	396.178	pplu	218
406	35.43	-1.28476	396.23	pplu	218
407	35.51	-1.55374	396.147	pplu	218
408	35.68	-1.31878	396.256	pplu	218
409	35.9	-1.68628	396.189	pplu	218
410	36.07	-1.4145	396.257	pplu	218
411	36.18	-1.70315	396.185	pplu	218
412	36.39	-1.15339	396.339	pplu	218
413	36.59	-1.36166	396.314	pplu	218
414	36.84	-1.25417	396.371	pplu	218
415	36.95	-1.85898	396.253	pplu	218
416	37.07	-1.59643	396.341	pplu	218
417	37.3	-1.54621	396.396	pplu	218
418	37.5	-1.45617	396.454	pplu	218
419	37.62	-1.45077	396.467	pplu	218
420	37.79	-1.38984	396.506	pplu	218
421	38	-1.40869	396.546	pplu	218
422	38.2	-1.29918	396.574	pplu	218
423	38.3	-1.41492	396.587	pplu	218
424	38.52	-1.31977	396.641	pplu	218
425	38.71	-1.8711	396.51	pplu	218
426	38.89	-1.56171	396.606	pplu	218
427	38.98	-1.42023	396.668	pplu	218
428	39.19	-1.66449	396.659	pplu	218
429	39.41	-1.61531	396.68	pplu	218
430	39.62	-1.78141	396.686	pplu	218
431	39.72	-1.87782	396.716	pplu	218
432	39.85	-1.39206	396.839	pplu	218
433	40.09	-1.82021	396.757	pplu	218
434	40.3	-1.48535	396.858	pplu	218
435	40.41	-1.49941	396.872	pplu	218
436	40.59	-1.82703	396.822	pplu	218
437	40.82	-1.64499	396.909	pplu	218
438	41	-1.33525	397.019	pplu	218
439	41.1	-1.73992	396.943	pplu	218
440	41.28	-1.69482	397.009	pplu	218
441	41.49	-1.781	397.005	pplu	218
442	41.73	-1.69061	397.04	pplu	218
443	41.82	-1.58644	397.074	pplu	218
444	42.18	-1.57213	397.157	pplu	218
445	42.55	-1.74726	397.138	pplu	218
446	42.67	-1.54324	397.224	pplu	218
447	42.83	-1.68977	397.199	pplu	218
448	43.02	-1.17017	397.369	pplu	218
449	43.1	-1.55881	397.269	pplu	218
450	43.26	-0.992291	397.452	pplu	218
451	43.49	-1.37309	397.373	pplu	218
452	43.73	-1.54779	397.38	pplu	218
453	43.83	-1.66395	397.366	pplu	218
454	43.93	-1.67496	397.38	pplu	218
455	44.17	-1.17029	397.537	pplu	218
456	44.43	-1.4038	397.507	pplu	218
457	44.54	-1.72529	397.462	pplu	218
458	44.66	-1.88759	397.46	pplu	218
459	44.92	-1.41088	397.577	pplu	218
460	45.11	-1.93746	397.476	pplu	218
461	45.23	-1.72745	397.583	pplu	218
462	45.42	-1.63592	397.604	pplu	218
463	45.63	-1.46916	397.67	pplu	218
464	45.81	-1.80192	397.609	pplu	218
465	45.97	-1.44783	397.714	pplu	218
466	46.17	-1.61618	397.709	pplu	218
467	46.39	-1.55176	397.71	pplu	218
468	46.57	-1.7345	397.681	pplu	218
469	46.7	-1.34261	397.804	pplu	218
470	46.88	-1.72375	397.718	pplu	218
471	47.12	-1.74982	397.753	pplu	218
472	47.26	-1.47646	397.844	pplu	218
473	47.38	-1.76417	397.783	pplu	218
474	47.57	-1.33042	397.891	pplu	218
475	47.75	-1.44897	397.844	pplu	218
476	48	-1.27662	397.871	pplu	218
477	48.12	-1.45877	397.809	pplu	218
478	48.32	-1.45944	397.867	pplu	218
479	48.5	-1.17155	397.95	pplu	218
480	48.66	-1.58207	397.884	pplu	218
481	48.79	-1.41801	397.937	pplu	218
482	48.99	-1.65264	397.914	pplu	218
483	49.21	-1.96989	397.858	pplu	218
484	49.3	-1.63529	397.913	pplu	218
485	49.47	-1.44127	397.978	pplu	218
486	49.76	-1.6255	397.957	pplu	218
487	49.93	-1.73625	397.939	pplu	218
488	50.07	-1.50403	397.999	pplu	218
489	50.16	-1.09258	398.111	pplu	218
490	50.38	-1.20495	398.103	pplu	218
491	50.64	-1.3866	398.082	pplu	218
492	50.7	-1.40535	398.094	pplu	218
493	50.91	-1.43133	398.118	pplu	218
494	51.11	-1.8045	397.991	pplu	218
495	51.31	-1.54432	398.053	pplu	218
496	51.47	-1.48442	398.088	pplu	218
497	51.58	-1.37231	398.15	pplu	218
498	51.78	-1.16461	398.22	pplu	218
499	52	-1.83256	398.042	pplu	218
500	52.17	-1.48137	398.132	pplu	218
501	52.26	-1.57163	398.132	pplu	218
502	52.52	-1.67412	398.147	pplu	218
503	52.76	-1.57947	398.18	pplu	218
504	52.86	-1.6167	398.173	pplu	218
505	52.99	-1.86874	398.12	pplu	218
506	53.15	-1.0122	398.325	pplu	218
507	53.42	-1.72563	398.191	pplu	218
508	53.58	-1.33053	398.296	pplu	218
509	53.65	-1.53214	398.245	pplu	218
510	53.85	-1.22505	398.311	pplu	218
511	54.14	-1.6432	398.219	pplu	218
512	54.34	-1.18777	398.337	pplu	218
513	54.67	-1.52318	398.283	pplu	218
514	54.73	-1.25196	398.329	pplu	218
515	55.14	-1.83856	398.226	pplu	218
516	55.39	-1.67541	398.287	pplu	218
517	55.54	-1.075	398.448	pplu	218
518	55.61	-1.32519	398.381	pplu	218
519	55.79	-1.61291	398.34	pplu	218
520	55.98	-1.5046	398.343	pplu	218
521	56.16	-1.82862	398.28	pplu	218
522	56.32	-1.42668	398.377	pplu	218
523	56.5	-1.42278	398.393	pplu	218
524	56.77	-1.37427	398.446	pplu	218
525	56.91	-1.34848	398.422	pplu	218
526	57.03	-1.38988	398.45	pplu	218
527	57.26	-1.39993	398.446	pplu	218
528	57.49	-1.41571	398.475	pplu	218
529	57.7	-1.20327	398.486	pplu	218
530	57.81	-1.35109	398.493	pplu	218
531	58.03	-1.32791	398.5	pplu	218
532	58.19	-2.06005	398.338	pplu	218
533	58.34	-1.15867	398.541	pplu	218
534	58.42	-1.73919	398.39	pplu	218
535	58.74	-1.03714	398.614	pplu	218
536	58.97	-1.54193	398.493	pplu	218
537	59.07	-1.60796	398.492	pplu	218
538	59.15	-1.53523	398.511	pplu	218
539	59.39	-1.492	398.536	pplu	218
540	59.6	-1.43128	398.552	pplu	218
541	59.76	-1.50858	398.562	pplu	218
542	59.9	-1.54515	398.572	pplu	218
543	60.1	-1.43928	398.598	pplu	218
544	60.31	-1.5716	398.575	pplu	218
545	60.44	-1.10506	398.703	pplu	218
546	60.56	-1.64583	398.571	pplu	218
547	60.84	-1.50854	398.613	pplu	218
548	60.98	-1.37007	398.68	pplu	218
549	61.16	-1.36985	398.706	pplu	218
550	61.31	-1.04556	398.789	pplu	218
551	61.49	-1.33136	398.714	pplu	218
552	61.72	-1.56699	398.697	pplu	218
553	61.89	-1.38647	398.753	pplu	218
554	61.99	-1.39356	398.731	pplu	218
555	62.18	-1.63671	398.698	pplu	218
556	62.44	-1.49805	398.749	pplu	218
557	62.6	-1.28577	398.812	pplu	218
558	62.64	-1.36002	398.799	pplu	218
559	62.91	-1.48996	398.771	pplu	218
560	63.09	-1.6165	398.742	pplu	218
561	63.28	-1.59996	398.766	pplu	218
562	63.44	-1.3044	398.845	pplu	218
563	63.6	-1.45909	398.825	pplu	218
564	63.82	-1.56499	398.823	pplu	218
565	63.95	-1.32712	398.893	pplu	218
566	64.06	-1.58043	398.847	pplu	218
567	64.24	-1.20067	398.942	pplu	218
568	64.54	-1.50124	398.91	pplu	218
569	64.73	-1.26734	398.949	pplu	218
570	64.85	-1.37311	398.925	pplu	218
571	65.09	-1.15944	399.034	pplu	218
572	65.33	-1.59322	398.93	pplu	218
573	65.42	-1.42356	398.991	pplu	218
574	65.58	-0.983685	399.089	pplu	218
575	65.78	-1.1783	399.047	pplu	218
576	66.03	-1.03818	399.105	pplu	218
577	66.11	-1.41747	399.005	pplu	218
578	66.32	-1.3904	399.056	pplu	218
579	66.54	-1.38168	399.054	pplu	218
580	66.66	-1.17249	399.158	pplu	218
581	66.75	-1.46208	399.083	pplu	218
582	66.98	-1.46104	399.098	pplu	218
583	67.23	-1.27999	399.161	pplu	218
584	67.42	-0.997965	399.235	pplu	218
585	67.51	-1.44872	399.159	pplu	218
586	67.63	-1.20336	399.226	pplu	218
587	67.93	-1.14248	399.251	pplu	218
588	68.12	-1.42495	399.222	pplu	218
589	68.23	-1.35301	399.246	pplu	218
590	68.41	-1.6659	399.149	pplu	218
591	68.64	-1.47676	399.203	pplu	218
592	68.86	-1.47741	399.233	pplu	218
593	68.91	-1.11181	399.315	pplu	218
594	69.1	-1.47745	399.249	pplu	218
595	69.28	-1.25322	399.314	pplu	218
596	69.46	-1.77583	399.231	pplu	218
597	69.69	-1.47692	399.301	pplu	218
598	69.82	-1.10206	399.417	pplu	218
599	69.99	-1.39106	399.531	pplu	218
600	70.2	-1.19859	400.038	pplu	218
601	70.36	-1.28115	399.83	pplu	218
602	70.49	-1.62297	399.703	pplu	218
603	70.71	-1.35591	399.737	pplu	218
604	70.93	-1.61218	399.664	pplu	218
605	71.08	-1.76509	399.609	pplu	218
606	71.13	-1.40468	399.684	pplu	218
607	71.41	-1.41347	399.721	pplu	218
608	71.68	-1.62699	399.678	pplu	218
609	71.76	-1.34061	399.776	pplu	218
610	71.84	-1.12029	399.831	pplu	218
611	72.11	-1.08328	399.842	pplu	218
612	72.35	-1.12054	399.864	pplu	218
613	72.43	-1.43892	399.811	pplu	218
614	72.82	-1.33552	399.905	pplu	218
615	73.16	-1.18962	399.969	pplu	218
616	73.22	-1.80565	399.832	pplu	218
617	73.45	-1.28706	399.995	pplu	218
618	73.59	-1.33465	400.037	pplu	218
619	73.68	-1.21584	400.055	pplu	218
620	73.85	-1.42175	400.046	pplu	218
621	74.08	-2.04792	399.932	pplu	218
622	74.34	-1.39686	400.134	pplu	218
623	74.41	-1.39156	400.159	pplu	218
624	74.61	-0.862138	400.35	pplu	218
625	74.87	-1.25796	400.281	pplu	218
626	75	-1.59655	400.198	pplu	218
627	75.07	-1.72105	400.213	pplu	218
628	75.28	-1.10436	400.432	pplu	218
629	75.57	-1.40129	400.387	pplu	218
630	75.69	-1.25074	400.486	pplu	218
631	75.8	-1.3919	400.477	pplu	218
632	76.02	-1.49703	400.485	pplu	218
633	76.2	-1.49156	400.58	pplu	218
634	76.44	-1.38518	400.636	pplu	218
635	76.56	-1.37158	400.663	pplu	218
636	76.82	-1.60011	400.634	pplu	218
637	76.98	-1.66364	400.736	pplu	218
638	77.09	-1.60956	401.151	pplu	218
639	77.27	-1.58294	401.533	pplu	218
640	77.48	-1.04911	401.678	pplu	218
641	77.79	-1.24358	401.574	pplu	218
642	77.85	-1.38425	401.521	pplu	218
643	78	-1.0994	401.65	pplu	218
644	78.22	-1.75367	401.529	pplu	218
645	78.38	-1.17492	401.739	pplu	218
646	78.55	-1.28301	401.74	pplu	218
647	78.72	-1.50125	401.722	pplu	218
648	78.94	-1.59227	401.756	pplu	218
649	79.1	-1.45631	401.834	pplu	218
650	79.18	-1.48828	401.899	pplu	218
651	79.41	-1.64408	401.928	pplu	218
652	79.63	-1.10653	402.147	pplu	218
653	79.86	-1.22064	402.189	pplu	218
654	79.98	-1.49042	402.19	pplu	218
655	80.08	-1.2294	402.368	pplu	218
656	80.3	-1.38575	402.382	pplu	218
657	80.53	-1.02324	402.613	pplu	218
658	80.68	-1.62206	402.546	pplu	218
659	80.7	-2.07131	402.554	pplu	218
660	80.92	-0.996503	403.053	pplu	218
661	81.28	-1.11429	403.342	pplu	218
662	81.38	-1.22934	403.549	pplu	218
663	81.48	-1.55174	403.632	pplu	218
664	81.71	-1.46842	403.709	pplu	218
665	81.93	-0.712822	404.03	pplu	218
666	82.09	-0.731578	404.131	pplu	218
667	82.18	-1.51389	404.067	pplu	218
668	82.38	-1.48005	404.213	pplu	218
669	82.63	-1.38637	404.415	pplu	218
670	82.78	-1.11192	404.605	pplu	218
671	82.95	-0.822625	404.869	pplu	218
672	83.06	-0.748734	405.035	pplu	218
673	83.31	-1.18914	405.094	pplu	218
674	83.5	-1.26297	405.374	pplu	218
675	83.64	-1.31483	405.733	pplu	218
676	83.87	-1.35072	406.015	pplu	218
677	83.98	-1.23902	406.243	pplu	218
678	84.2	-0.981443	406.478	pplu	218
679	84.31	-0.897355	406.682	pplu	218
680	84.45	-0.780719	406.863	pplu	218
681	84.78	-1.1693	406.928	pplu	218
682	84.97	-1.0694	407.19	pplu	218
683	85.02	-0.882573	407.563	pplu	218
684	85.32	-0.618558	407.821	pplu	218
685	85.57	-0.688444	408.008	pplu	218
686	85.61	-0.509516	408.321	pplu	218
687	85.86	-1.17901	408.852	pplu	218
688	86.22	-0.734939	409.374	pplu	218
689	86.37	-0.194994	409.633	pplu	218
690	86.42	-0.554537	409.714	pplu	218
691	86.54	-0.639771	409.901	pplu	218
692	86.8	-0.384299	410.178	pplu	218
693	87.04	-0.52171	410.323	pplu	218
694	87.14	0.197663	410.656	pplu	218
695	87.26	-0.442176	410.69	pplu	218
696	87.54	-0.365968	410.874	pplu	218
697	87.75	-0.194083	411.254	pplu	218
698	88.11	-0.673646	411.392	pplu	218
699	88.53	0.479359	411.734	pplu	218
700	88.63	0.0856165	411.81	pplu	218
701	88.92	0.282406	411.893	pplu	218
702	89.08	0.00128838	411.881	pplu	218
703	89.18	0.365362	411.975	pplu	218
704	89.4	0.871885	412.09	pplu	218
705	89.67	0.359206	411.968	pplu	218
706	89.71	0.193359	411.893	pplu	218
707	89.87	0.282089	411.885	pplu	218
708	90.07	0.904936	411.995	pplu	218
709	90.28	0.136664	411.72	pplu	218
710	90.36	0.764924	411.823	pplu	218
711	90.67	0.78712	412.885	pplu	218
712	90.87	0.643369	412.16	pplu	218
713	91.02	0.569271	411.895	pplu	218
714	91.1	0.221663	411.704	pplu	218
715	91.3	0.987012	411.759	pplu	218
716	91.53	0.466723	411.549	pplu	218
717	91.62	0.557882	411.472	pplu	218
718	91.86	0.610896	411.414	pplu	218
719	92.02	0.0341639	411.192	pplu	218
720	92.17	0.388825	411.241	pplu	218
721	92.53	0.440589	411.178	pplu	218
722	92.71	0.329434	411.159	pplu	218
723	93.09	0.652429	412.134	pplu	218
724	93.21	0.225966	411.66	pplu	218
725	93.61	0.796144	411.77	pplu	218
726	93.71	0.105471	411.536	pplu	218
727	93.81	0.00185745	411.475	pplu	218
728	94.04	0.952252	411.639	pplu	218
729	94.24	0.440495	411.629	pplu	218
730	94.38	0.0710643	411.923	pplu	218
731	94.65	0.269313	412.016	pplu	218
732	94.7	0.817484	412.073	pplu	218
733	94.83	0.314838	411.867	pplu	218
734	95.13	0.595902	411.859	pplu	218
735	95.38	0.707454	411.841	pplu	218
736	95.42	0.663874	411.805	pplu	218
737	95.54	0.0702527	411.63	pplu	218
738	95.82	0.435537	411.721	pplu	218
739	95.99	0.571394	411.713	pplu	218
740	96.1	0.755803	411.811	pplu	218
741	96.34	0.305717	411.685	pplu	218
742	96.5	0.679953	411.765	pplu	218
743	96.69	0.513098	411.745	pplu	218
744	96.84	0.233039	411.683	pplu	218
745	96.92	0.272919	411.64	pplu	218
746	97.2	0.228684	411.602	pplu	218
747	97.44	0.224928	411.545	pplu	218
748	97.54	0.386165	411.538	pplu	218
749	97.89	0.743329	411.594	pplu	218
750	98.11	0.290458	411.472	pplu	218
751	29.99	-3.37297	414.396	amac	218
752	30.19	-3.43126	414.28	amac	218
753	30.46	-3.53775	414.287	amac	218
754	30.61	-3.37837	414.335	amac	218
755	30.78	-2.97832	414.449	amac	218
756	31.02	-3.93506	414.278	amac	218
757	31.24	-3.60942	414.359	amac	218
758	31.42	-4.12068	414.25	amac	218
759	31.5	-3.76762	414.371	amac	218
760	31.64	-3.41823	414.499	amac	218
761	31.89	-4.00969	414.336	amac	218
762	32.08	-3.52815	414.428	amac	218
763	32.2	-3.95723	414.409	amac	218
764	32.39	-3.22981	414.6	amac	218
765	32.59	-3.29777	414.639	amac	218
766	32.74	-3.48111	414.624	amac	218
767	32.89	-3.34727	414.701	amac	218
768	33.09	-3.76138	414.623	amac	218
769	33.32	-3.61833	414.71	amac	218
770	33.48	-3.84299	414.721	amac	218
771	33.61	-3.41987	414.836	amac	218
772	33.77	-3.59914	414.84	amac	218
773	34	-3.5503	414.889	amac	218
774	34.17	-3.39439	414.944	amac	218
775	34.25	-3.89587	414.815	amac	218
776	34.47	-3.47244	414.999	amac	218
777	34.71	-3.51637	414.984	amac	218
778	34.88	-3.19187	415.095	amac	218
779	34.99	-3.07433	415.136	amac	218
780	35.18	-3.29306	415.11	amac	218
781	35.39	-3.52962	415.097	amac	218
782	35.57	-2.84654	415.289	amac	218
783	35.71	-3.55307	415.161	amac	218
784	35.91	-3.55619	415.225	amac	218
785	36.11	-3.59571	415.229	amac	218
786	36.24	-3.62627	415.244	amac	218
787	36.39	-3.36083	415.339	amac	218
788	36.61	-3.92822	415.225	amac	218
789	36.81	-3.43514	415.427	amac	218
790	36.94	-3.97295	415.318	amac	218
791	37.06	-3.51024	415.474	amac	218
792	37.3	-3.62148	415.49	amac	218
793	37.52	-3.08225	415.665	amac	218
794	37.66	-3.01955	415.706	amac	218
795	37.78	-3.18635	415.767	amac	218
796	37.98	-3.42478	415.713	amac	218
797	38.19	-3.72211	415.66	amac	218
798	38.4	-3.3461	415.813	amac	218
799	38.46	-3.20927	415.836	amac	218
800	38.66	-3.0926	415.929	amac	218
801	38.91	-3.55318	415.856	amac	218
802	39.11	-3.46619	415.883	amac	218
803	39.21	-3.05005	416.074	amac	218
804	39.41	-3.37263	416.036	amac	218
805	39.6	-3.12543	416.143	amac	218
806	39.74	-3.75997	416.001	amac	218
807	39.91	-3.49422	416.067	amac	218
808	40.11	-3.5434	416.086	amac	218
809	40.33	-3.26383	416.208	amac	218
810	40.51	-3.54186	416.106	amac	218
811	40.6	-3.20429	416.25	amac	218
812	40.79	-3.53107	416.177	amac	218
813	41.01	-2.76454	416.46	amac	218
814	41.15	-3.7442	416.176	amac	218
815	41.31	-3.19648	416.359	amac	218
816	41.47	-2.96761	416.454	amac	218
817	41.7	-3.50311	416.316	amac	218
818	41.87	-3.67506	416.301	amac	218
819	41.97	-3.51275	416.356	amac	218
820	42.13	-3.45966	416.372	amac	218
821	42.41	-3.64201	416.395	amac	218
822	42.59	-3.59923	416.443	amac	218
823	42.71	-3.32358	416.506	amac	218
824	42.92	-3.28788	416.579	amac	218
825	43.1	-4.14134	416.375	amac	218
826	43.25	-3.7308	416.477	amac	218
827	43.36	-3.47375	416.491	amac	218
828	43.58	-3.10928	416.494	amac	218
829	43.83	-3.12709	416.544	amac	218
830	43.98	-3.26387	416.537	amac	218
831	44.11	-3.21928	416.553	amac	218
832	44.3	-3.43987	416.569	amac	218
833	44.52	-3.40675	416.498	amac	218
834	44.66	-3.42396	416.461	amac	218
835	44.76	-2.74221	416.636	amac	218
836	44.99	-3.60301	416.463	amac	218
837	45.23	-3.66573	416.464	amac	218
838	45.38	-3.12087	416.681	amac	218
839	45.47	-3.45955	416.57	amac	218
840	45.69	-2.98972	416.71	amac	218
841	45.9	-3.06967	416.741	amac	218
842	46.07	-3.02377	416.76	amac	218
843	46.19	-3.24533	416.715	amac	218
844	46.39	-3.19269	416.787	amac	218
845	46.61	-3.18711	416.826	amac	218
846	46.79	-3.58507	416.77	amac	218
847	46.88	-3.50751	416.775	amac	218
848	47.11	-3.56526	416.754	amac	218
849	47.29	-3.79388	416.674	amac	218
850	47.48	-3.76513	416.742	amac	218
851	47.54	-3.23491	416.723	amac	218
852	47.8	-3.16373	416.726	amac	218
853	48.04	-3.99273	416.519	amac	218
854	48.21	-3.4616	416.643	amac	218
855	48.35	-3.18016	416.78	amac	218
856	48.49	-3.52724	416.707	amac	218
857	48.68	-3.65613	416.708	amac	218
858	48.92	-3.55777	416.712	amac	218
859	49.03	-3.13428	416.823	amac	218
860	49.19	-3.28298	416.816	amac	218
861	49.4	-2.87969	416.953	amac	218
862	49.61	-3.09674	416.922	amac	218
863	49.78	-3.12184	416.928	amac	218
864	50	-3.04525	416.964	amac	218
865	50.23	-3.11138	416.984	amac	218
866	50.36	-3.35054	416.93	amac	218
867	50.45	-3.26633	416.948	amac	218
868	50.72	-3.72732	416.827	amac	218
869	50.94	-3.52119	416.904	amac	218
870	51.07	-3.58622	416.936	amac	218
871	51.18	-3.77513	416.86	amac	218
872	51.38	-3.24151	417.011	amac	218
873	51.56	-3.63865	416.878	amac	218
874	51.76	-3.49456	416.992	amac	218
875	51.91	-2.9964	417.17	amac	218
876	52.13	-3.4246	417.092	amac	218
877	52.29	-2.97985	417.159	amac	218
878	52.47	-2.95572	417.16	amac	218
879	52.58	-3.24202	417.127	amac	218
880	52.8	-2.93112	417.245	amac	218
881	53.05	-3.48143	417.103	amac	218
882	53.15	-3.11427	417.234	amac	218
883	53.24	-3.49665	417.129	amac	218
884	53.43	-3.40526	417.165	amac	218
885	53.79	-3.44199	417.233	amac	218
886	53.96	-3.59352	417.228	amac	218
887	54.03	-3.67847	417.109	amac	218
888	54.19	-3.19746	417.239	amac	218
889	54.42	-3.16011	417.287	amac	218
890	54.56	-3.39711	417.243	amac	218
891	54.71	-3.19198	417.279	amac	218
892	54.88	-3.31709	417.283	amac	218
893	55.1	-3.33766	417.276	amac	218
894	55.28	-3.34876	417.269	amac	218
895	55.39	-3.1787	417.329	amac	218
896	55.58	-3.24968	417.332	amac	218
897	55.8	-3.49285	417.263	amac	218
898	55.97	-2.77709	417.472	amac	218
899	56.09	-3.88206	417.213	amac	218
900	56.35	-3.46992	417.303	amac	218
901	56.51	-3.28813	417.353	amac	218
902	56.65	-3.45564	417.281	amac	218
903	56.77	-3.76301	417.187	amac	218
904	56.96	-3.25671	417.329	amac	218
905	57.22	-3.2582	417.404	amac	218
906	57.38	-2.96841	417.464	amac	218
907	57.45	-3.19021	417.41	amac	218
908	57.72	-3.30766	417.397	amac	218
909	57.93	-2.71685	417.581	amac	218
910	58.07	-3.12729	417.477	amac	218
911	58.2	-3.17997	417.447	amac	218
912	58.39	-3.40048	417.443	amac	218
913	58.6	-3.7765	417.359	amac	218
914	58.73	-2.97659	417.611	amac	218
915	58.81	-2.98374	417.602	amac	218
916	59.1	-3.50792	417.512	amac	218
917	59.35	-3.67124	417.505	amac	218
918	59.49	-2.94031	417.688	amac	218
919	59.58	-3.11582	417.656	amac	218
920	59.74	-4.09136	417.405	amac	218
921	59.98	-3.27715	417.634	amac	218
922	60.25	-3.03479	417.696	amac	218
923	60.32	-3.19586	417.645	amac	218
924	60.5	-3.29881	417.645	amac	218
925	60.7	-3.10282	417.713	amac	218
926	60.85	-2.91486	417.752	amac	218
927	60.96	-3.51605	417.595	amac	218
928	61.19	-2.95395	417.769	amac	218
929	61.43	-3.10356	417.753	amac	218
930	61.59	-3.5402	417.671	amac	218
931	61.67	-3.15642	417.781	amac	218
932	61.91	-3.40414	417.718	amac	218
933	62.16	-3.75251	417.645	amac	218
934	62.3	-3.43755	417.767	amac	218
935	62.35	-3.45325	417.738	amac	218
936	62.58	-3.11924	417.851	amac	218
937	62.81	-3.54972	417.785	amac	218
938	63.03	-2.79465	418.002	amac	218
939	63.15	-3.40951	417.852	amac	218
940	63.35	-2.63095	418.045	amac	218
941	63.65	-2.87226	417.995	amac	218
942	63.77	-3.70637	417.796	amac	218
943	63.91	-2.90719	418.008	amac	218
944	64.14	-3.36476	417.939	amac	218
945	64.33	-2.87124	418.086	amac	218
946	64.42	-3.15623	418.05	amac	218
947	64.65	-3.63922	417.929	amac	218
948	65.01	-3.46518	418.033	amac	218
949	65.1	-3.01134	418.19	amac	218
950	65.27	-3.13975	418.182	amac	218
951	65.46	-3.53906	418.095	amac	218
952	65.76	-2.81582	418.27	amac	218
953	65.8	-2.86108	418.335	amac	218
954	65.96	-3.18656	418.281	amac	218
955	66.21	-3.04528	418.51	amac	218
956	66.42	-3.69827	418.62	amac	218
957	66.5	-3.14111	418.953	amac	218
958	66.7	-3.41348	418.916	amac	218
959	66.91	-3.45948	418.781	amac	218
960	67.09	-2.79566	418.862	amac	218
961	67.22	-3.67751	418.651	amac	218
962	67.43	-3.34419	418.714	amac	218
963	67.61	-3.54611	418.669	amac	218
964	67.81	-3.30636	418.728	amac	218
965	67.95	-3.53789	418.711	amac	218
966	68.11	-2.71523	418.978	amac	218
967	68.28	-3.73137	418.727	amac	218
968	68.53	-3.07768	418.932	amac	218
969	68.65	-3.1098	418.955	amac	218
970	68.79	-2.52359	419.151	amac	218
971	69.01	-3.21139	418.97	amac	218
972	69.21	-3.26014	418.994	amac	218
973	69.35	-2.91745	419.154	amac	218
974	69.49	-3.1992	419.102	amac	218
975	69.67	-3.36216	419.141	amac	218
976	69.94	-2.87584	419.32	amac	218
977	70.07	-3.47309	419.207	amac	218
978	70.11	-3.42221	419.244	amac	218
979	70.36	-3.54438	419.256	amac	218
980	70.68	-3.72906	419.278	amac	218
981	70.82	-3.33699	419.416	amac	218
982	70.92	-3.40826	419.446	amac	218
983	71.03	-3.48734	419.464	amac	218
984	71.29	-3.12852	419.59	amac	218
985	71.54	-3.51516	419.521	amac	218
986	71.65	-3.40011	419.581	amac	218
987	71.96	-2.77424	419.777	amac	218
988	72.14	-2.93194	419.765	amac	218
989	72.37	-3.35281	419.744	amac	218
990	72.63	-3.27447	419.782	amac	218
991	72.78	-2.9332	419.908	amac	218
992	72.97	-3.47951	419.807	amac	218
993	73.1	-3.50255	419.847	amac	218
994	73.35	-3.65493	419.851	amac	218
995	73.48	-2.82765	420.105	amac	218
996	73.62	-3.59872	419.936	amac	218
997	73.77	-3.28779	420.08	amac	218
998	73.99	-3.55238	420.034	amac	218
999	74.27	-2.70467	420.234	amac	218
1000	74.3	-3.33532	420.136	amac	218
1001	74.49	-3.03306	420.248	amac	218
1002	74.7	-3.38298	420.172	amac	218
1003	74.88	-2.88275	420.359	amac	218
1004	74.98	-3.05764	420.349	amac	218
1005	75.25	-3.87805	420.19	amac	218
1006	75.44	-3.04568	420.457	amac	218
1007	75.62	-3.2633	420.45	amac	218
1008	75.78	-2.70711	420.635	amac	218
1009	76.03	-3.33958	420.484	amac	218
1010	76.19	-3.54191	420.535	amac	218
1011	76.38	-3.44161	420.584	amac	218
1012	76.53	-3.34236	420.645	amac	218
1013	76.72	-2.78163	420.822	amac	218
1014	76.95	-3.2692	420.731	amac	218
1015	77.06	-3.4168	420.71	amac	218
1016	77.15	-3.41174	420.749	amac	218
1017	77.38	-2.85164	420.953	amac	218
1018	77.66	-3.1258	420.943	amac	218
1019	77.77	-3.33107	420.961	amac	218
1020	77.86	-3.05907	421.079	amac	218
1021	78.09	-3.19408	421.092	amac	218
1022	78.32	-2.72484	421.287	amac	218
1023	78.47	-2.62878	421.395	amac	218
1024	78.57	-3.1881	421.272	amac	218
1025	78.8	-3.4597	421.285	amac	218
1026	79.03	-3.19726	421.441	amac	218
1027	79.15	-3.41918	421.454	amac	218
1028	79.26	-3.21146	421.621	amac	218
1029	79.53	-3.18842	421.745	amac	218
1030	79.74	-3.20087	421.869	amac	218
1031	79.89	-3.31207	421.969	amac	218
1032	79.94	-2.72381	422.268	amac	218
1033	80.23	-2.70109	422.446	amac	218
1034	80.44	-2.31976	422.72	amac	218
1035	80.52	-2.9828	422.777	amac	218
1036	80.64	-2.64311	423.066	amac	218
1037	80.85	-2.84767	423.237	amac	218
1038	81.2	-2.78432	423.509	amac	218
1039	81.29	-2.65262	423.758	amac	218
1040	81.3	-2.4216	424.004	amac	218
1041	81.65	-2.42661	424.177	amac	218
1042	81.85	-2.93278	424.233	amac	218
1043	81.93	-2.589	424.453	amac	218
1044	82.05	-2.48649	424.579	amac	218
1045	82.36	-2.04041	424.781	amac	218
1046	82.53	-2.13725	424.806	amac	218
1047	82.63	-1.75131	424.928	amac	218
1048	82.78	-2.21725	424.832	amac	218
1049	83.01	-2.38126	424.763	amac	218
1050	83.24	-1.83176	424.901	amac	218
1051	83.36	-1.49018	424.953	amac	218
1052	83.47	-1.98579	424.786	amac	218
1053	83.75	-1.41767	424.87	amac	218
1054	83.93	-0.991141	424.915	amac	218
1055	84.07	-0.752476	424.923	amac	218
1056	84.19	-1.59956	424.57	amac	218
1057	84.37	-0.906067	424.655	amac	218
1058	84.65	-1.44498	424.429	amac	218
1059	84.75	-1.20233	424.428	amac	218
1060	84.88	-1.01878	424.345	amac	218
1061	85.1	-1.27678	424.235	amac	218
1062	85.25	-0.784353	424.272	amac	218
1063	85.54	-1.53211	424.012	amac	218
1064	85.73	-0.520329	424.183	amac	218
1065	86.16	-0.70588	424.085	amac	218
1066	86.24	-0.654762	424.063	amac	218
1067	86.46	-1.05057	423.895	amac	218
1068	86.71	-0.846561	423.931	amac	218
1069	86.89	-0.506131	423.964	amac	218
1070	86.92	-0.9017	423.845	amac	218
1071	87.2	-1.43209	423.692	amac	218
1072	87.48	-0.744168	423.855	amac	218
1073	87.67	-1.03666	423.767	amac	218
1074	87.72	-1.17932	423.659	amac	218
1075	87.87	-0.955804	423.727	amac	218
1076	88.3	-0.541276	423.823	amac	218
1077	88.4	-0.681257	423.742	amac	218
1078	88.55	-0.102439	423.873	amac	218
1079	88.77	-1.13076	423.605	amac	218
1080	88.92	-0.934528	423.593	amac	218
1081	89.06	-1.0366	423.532	amac	218
1082	89.32	-0.482146	423.656	amac	218
1083	89.48	-1.17598	423.466	amac	218
1084	89.72	-0.74724	423.575	amac	218
1085	89.81	0.0365202	423.747	amac	218
1086	90.09	-1.05139	423.576	amac	218
1087	90.27	-0.458117	423.834	amac	218
1088	90.46	-0.915478	423.799	amac	218
1089	90.67	-0.599271	423.838	amac	218
1090	90.8	-0.996804	423.601	amac	218
1091	91.03	-0.305746	423.663	amac	218
1092	91.18	-0.185099	423.575	amac	218
1093	91.25	-0.674339	423.436	amac	218
1094	91.45	-0.291555	423.468	amac	218
1095	91.74	-0.683199	423.381	amac	218
1096	91.94	-0.63747	423.408	amac	218
1097	92.05	-0.615056	423.507	amac	218
1098	92.39	-0.500447	423.582	amac	218
1099	92.48	-0.449155	423.645	amac	218
1100	92.51	-0.95166	423.557	amac	218
1101	92.84	-0.645024	423.681	amac	218
1102	93.07	-0.404559	424.102	amac	218
1103	93.15	-0.69612	424.125	amac	218
1104	93.38	-0.878955	424.157	amac	218
1105	93.49	-1.17451	424.162	amac	218
1106	93.62	-0.790786	424.289	amac	218
1107	93.98	-0.747529	424.39	amac	218
1108	94.02	-0.734046	424.535	amac	218
1109	94.13	-0.499255	424.706	amac	218
1110	94.45	-1.5341	424.534	amac	218
1111	94.63	-0.936202	424.663	amac	218
1112	94.71	-0.942	424.582	amac	218
1113	94.85	-0.515543	424.658	amac	218
1114	95.04	-1.05491	424.501	amac	218
1115	95.37	-0.426788	424.675	amac	218
1116	95.41	-0.901741	424.824	amac	218
1117	95.7	-0.24277	425.352	amac	218
1118	96.01	-0.850226	425.543	amac	218
1119	96.16	-0.654461	425.862	amac	218
1120	96.43	-0.552041	426.048	amac	218
1121	96.64	-0.963984	426.003	amac	218
1122	96.79	-0.613525	426.13	amac	218
1123	96.86	-1.49898	425.948	amac	218
1124	97.07	-0.827844	426.042	amac	218
1125	97.37	-0.671296	426.048	amac	218
1126	97.47	-1.03693	426.038	amac	218
1127	97.51	-0.609136	426.271	amac	218
1128	97.86	-0.970726	426.194	amac	218
1129	98.04	-0.452921	426.335	amac	218
1130	29.99	-3.07553	383.701	amacV14L	218
1131	30.16	-3.00383	383.739	amacV14L	218
1132	30.46	-2.6436	383.846	amacV14L	218
1133	30.62	-3.17073	383.705	amacV14L	218
1134	30.8	-3.21047	383.728	amacV14L	218
1135	30.99	-3.10481	383.759	amacV14L	218
1136	31.19	-2.90442	383.805	amacV14L	218
1137	31.34	-2.99209	383.792	amacV14L	218
1138	31.48	-3.31846	383.753	amacV14L	218
1139	31.66	-3.3242	383.773	amacV14L	218
1140	31.92	-2.72358	383.907	amacV14L	218
1141	32.04	-3.14199	383.83	amacV14L	218
1142	32.2	-3.47958	383.752	amacV14L	218
1143	32.39	-3.1419	383.864	amacV14L	218
1144	32.61	-3.13216	383.9	amacV14L	218
1145	32.73	-3.26627	383.888	amacV14L	218
1146	32.87	-3.56006	383.837	amacV14L	218
1147	33.09	-2.93381	384.029	amacV14L	218
1148	33.31	-3.16476	383.992	amacV14L	218
1149	33.41	-3.46953	383.977	amacV14L	218
1150	33.56	-3.34234	384.04	amacV14L	218
1151	33.8	-3.24619	384.114	amacV14L	218
1152	34	-3.46047	384.122	amacV14L	218
1153	34.12	-3.57179	384.13	amacV14L	218
1154	34.27	-3.15114	384.25	amacV14L	218
1155	34.52	-3.18877	384.256	amacV14L	218
1156	34.74	-3.26995	384.312	amacV14L	218
1157	34.81	-3.43575	384.281	amacV14L	218
1158	34.95	-2.99414	384.451	amacV14L	218
1159	35.17	-3.1199	384.463	amacV14L	218
1160	35.4	-3.37735	384.473	amacV14L	218
1161	35.55	-3.22532	384.574	amacV14L	218
1162	35.69	-3.09401	384.645	amacV14L	218
1163	35.89	-3.15827	384.731	amacV14L	218
1164	36.1	-2.86789	384.842	amacV14L	218
1165	36.21	-3.41528	384.742	amacV14L	218
1166	36.38	-3.7525	384.677	amacV14L	218
1167	36.59	-3.22759	384.865	amacV14L	218
1168	36.81	-2.9959	385.008	amacV14L	218
1169	36.95	-3.48926	384.889	amacV14L	218
1170	37.08	-3.33325	384.971	amacV14L	218
1171	37.3	-3.29387	385.042	amacV14L	218
1172	37.53	-3.12362	385.126	amacV14L	218
1173	37.63	-3.14369	385.183	amacV14L	218
1174	37.76	-3.41822	385.153	amacV14L	218
1175	38	-2.94593	385.315	amacV14L	218
1176	38.18	-3.19329	385.3	amacV14L	218
1177	38.29	-3.5386	385.255	amacV14L	218
1178	38.5	-3.40751	385.339	amacV14L	218
1179	38.73	-2.80977	385.517	amacV14L	218
1180	38.93	-3.38205	385.384	amacV14L	218
1181	39.08	-3.27949	385.511	amacV14L	218
1182	39.27	-3.21705	385.572	amacV14L	218
1183	39.48	-3.28845	385.603	amacV14L	218
1184	39.69	-2.90101	385.703	amacV14L	218
1185	39.82	-3.24887	385.652	amacV14L	218
1186	39.99	-3.49977	385.589	amacV14L	218
1187	40.18	-3.53287	385.63	amacV14L	218
1188	40.41	-3.42726	385.669	amacV14L	218
1189	40.5	-3.65618	385.671	amacV14L	218
1190	40.67	-3.20649	385.82	amacV14L	218
1191	40.92	-3.5548	385.705	amacV14L	218
1192	41.05	-3.46656	385.787	amacV14L	218
1193	41.21	-3.29133	385.898	amacV14L	218
1194	41.44	-2.59315	386.111	amacV14L	218
1195	41.63	-3.44659	385.928	amacV14L	218
1196	41.74	-3.14448	386.044	amacV14L	218
1197	41.89	-3.31215	386.059	amacV14L	218
1198	42.11	-3.35909	386.073	amacV14L	218
1199	42.31	-3.04584	386.177	amacV14L	218
1200	42.51	-2.7641	386.273	amacV14L	218
1201	42.62	-3.15289	386.169	amacV14L	218
1202	42.79	-3.00918	386.286	amacV14L	218
1203	42.97	-3.31432	386.206	amacV14L	218
1204	43.14	-3.26634	386.275	amacV14L	218
1205	43.26	-3.35974	386.29	amacV14L	218
1206	43.5	-3.39807	386.31	amacV14L	218
1207	43.76	-3.30331	386.35	amacV14L	218
1208	43.88	-3.12143	386.367	amacV14L	218
1209	43.95	-3.23367	386.369	amacV14L	218
1210	44.14	-3.37105	386.376	amacV14L	218
1211	44.46	-2.95967	386.508	amacV14L	218
1212	44.61	-3.42628	386.401	amacV14L	218
1213	44.8	-3.41533	386.436	amacV14L	218
1214	45.02	-3.13832	386.586	amacV14L	218
1215	45.22	-3.01241	386.637	amacV14L	218
1216	45.3	-2.85385	386.732	amacV14L	218
1217	45.5	-3.30941	386.674	amacV14L	218
1218	45.71	-2.95911	386.783	amacV14L	218
1219	45.95	-3.28088	386.743	amacV14L	218
1220	46.08	-2.76858	386.905	amacV14L	218
1221	46.16	-3.1469	386.845	amacV14L	218
1222	46.36	-3.04844	386.873	amacV14L	218
1223	46.6	-3.29615	386.874	amacV14L	218
1224	46.73	-2.53359	387.114	amacV14L	218
1225	46.87	-2.99393	387.012	amacV14L	218
1226	47.09	-3.5805	386.932	amacV14L	218
1227	47.29	-3.36481	387.013	amacV14L	218
1228	47.44	-3.1593	387.079	amacV14L	218
1229	47.57	-3.52523	387.032	amacV14L	218
1230	47.84	-2.88501	387.245	amacV14L	218
1231	48.01	-3.35071	387.153	amacV14L	218
1232	48.14	-3.11778	387.213	amacV14L	218
1233	48.27	-3.25325	387.179	amacV14L	218
1234	48.47	-3.30353	387.212	amacV14L	218
1235	48.73	-2.83397	387.353	amacV14L	218
1236	48.91	-2.85207	387.426	amacV14L	218
1237	49	-3.64536	387.28	amacV14L	218
1238	49.21	-3.47103	387.368	amacV14L	218
1239	49.41	-3.20752	387.495	amacV14L	218
1240	49.54	-2.65584	387.663	amacV14L	218
1241	49.68	-2.90935	387.546	amacV14L	218
1242	49.85	-3.73121	387.336	amacV14L	218
1243	50.11	-2.99878	387.583	amacV14L	218
1244	50.33	-3.57341	387.466	amacV14L	218
1245	50.41	-3.38257	387.554	amacV14L	218
1246	50.63	-3.32209	387.556	amacV14L	218
1247	50.81	-3.12029	387.647	amacV14L	218
1248	50.94	-3.49985	387.594	amacV14L	218
1249	51.07	-3.0479	387.725	amacV14L	218
1250	51.3	-3.32774	387.665	amacV14L	218
1251	51.49	-3.46515	387.639	amacV14L	218
1252	51.66	-3.31491	387.726	amacV14L	218
1253	51.74	-2.75757	387.841	amacV14L	218
1254	52	-3.49385	387.683	amacV14L	218
1255	52.29	-3.57402	387.697	amacV14L	218
1256	52.39	-3.27198	387.821	amacV14L	218
1257	52.49	-3.09134	387.681	amacV14L	218
1258	52.69	-2.99166	387.739	amacV14L	218
1259	52.89	-3.45653	387.69	amacV14L	218
1260	53.1	-3.07377	387.808	amacV14L	218
1261	53.18	-3.17007	387.817	amacV14L	218
1262	53.41	-3.18642	387.839	amacV14L	218
1263	53.63	-3.23598	387.866	amacV14L	218
1264	53.8	-3.40612	387.879	amacV14L	218
1265	53.89	-3.45886	387.775	amacV14L	218
1266	54.07	-3.24282	387.872	amacV14L	218
1267	54.33	-3.18326	387.782	amacV14L	218
1268	54.46	-2.7947	387.836	amacV14L	218
1269	54.59	-2.91234	387.801	amacV14L	218
1270	54.79	-3.06622	387.79	amacV14L	218
1271	55.03	-3.26124	387.773	amacV14L	218
1272	55.17	-3.28325	387.745	amacV14L	218
1273	55.26	-3.19886	387.711	amacV14L	218
1274	55.45	-3.00913	387.8	amacV14L	218
1275	55.76	-3.07622	387.482	amacV14L	218
1276	55.83	-3.61572	387.207	amacV14L	218
1277	56.02	-3.04107	387.252	amacV14L	218
1278	56.22	-3.32959	387.194	amacV14L	218
1279	56.38	-3.08598	387.158	amacV14L	218
1280	56.53	-3.61689	387.096	amacV14L	218
1281	56.67	-2.78596	387.274	amacV14L	218
1282	56.94	-2.81459	387.159	amacV14L	218
1283	57.17	-3.33579	387.072	amacV14L	218
1284	57.29	-3.11161	387.043	amacV14L	218
1285	57.36	-3.43124	387.007	amacV14L	218
1286	57.54	-3.43069	387.023	amacV14L	218
1287	57.77	-3.03318	387.104	amacV14L	218
1288	57.97	-2.89014	387.04	amacV14L	218
1289	58.13	-2.7462	386.964	amacV14L	218
1290	58.34	-2.96646	386.849	amacV14L	218
1291	58.5	-3.31082	386.685	amacV14L	218
1292	58.67	-3.25765	386.627	amacV14L	218
1293	58.79	-2.84866	386.775	amacV14L	218
1294	59.01	-3.46194	386.671	amacV14L	218
1295	59.21	-3.47954	386.473	amacV14L	218
1296	59.39	-3.19339	386.395	amacV14L	218
1297	59.5	-2.91792	386.484	amacV14L	218
1298	59.71	-3.03567	386.241	amacV14L	218
1299	59.89	-3.07577	386.227	amacV14L	218
1300	60.07	-3.04685	386.262	amacV14L	218
1301	60.17	-2.92697	386.322	amacV14L	218
1302	60.4	-3.19742	386.295	amacV14L	218
1303	60.66	-3.34289	386.272	amacV14L	218
1304	60.8	-3.09268	386.354	amacV14L	218
1305	60.88	-2.90919	386.081	amacV14L	218
1306	61.08	-3.05404	386.03	amacV14L	218
1307	61.3	-3.06189	386.04	amacV14L	218
1308	61.49	-3.62546	385.949	amacV14L	218
1309	61.59	-3.15992	386.094	amacV14L	218
1310	61.81	-3.19483	386.004	amacV14L	218
1311	62.05	-2.62969	386.174	amacV14L	218
1312	62.18	-2.97304	386.095	amacV14L	218
1313	62.26	-2.99618	386.119	amacV14L	218
1314	62.46	-3.15331	386.116	amacV14L	218
1315	62.76	-3.45892	385.765	amacV14L	218
1316	62.93	-3.41981	385.777	amacV14L	218
1317	63.01	-3.08001	385.898	amacV14L	218
1318	63.38	-3.22176	385.856	amacV14L	218
1319	63.54	-3.25148	385.728	amacV14L	218
1320	63.62	-2.66022	385.913	amacV14L	218
1321	63.82	-3.03792	385.801	amacV14L	218
1322	64.02	-3.43225	385.738	amacV14L	218
1323	64.24	-2.71001	385.957	amacV14L	218
1324	64.3	-2.92157	385.905	amacV14L	218
1325	64.49	-2.91189	385.934	amacV14L	218
1326	64.7	-3.42451	385.786	amacV14L	218
1327	64.91	-3.03322	385.908	amacV14L	218
1328	65.1	-3.17825	385.89	amacV14L	218
1329	65.19	-2.84894	385.996	amacV14L	218
1330	65.34	-2.88856	386.003	amacV14L	218
1331	65.62	-2.85832	386.045	amacV14L	218
1332	65.74	-3.26584	385.919	amacV14L	218
1333	65.86	-3.52209	385.896	amacV14L	218
1334	66.11	-3.06646	386.038	amacV14L	218
1335	66.35	-2.89203	386.099	amacV14L	218
1336	66.4	-3.25087	386.025	amacV14L	218
1337	66.54	-3.27463	386.083	amacV14L	218
1338	66.76	-3.13649	386.095	amacV14L	218
1339	67.03	-3.05953	386.144	amacV14L	218
1340	67.27	-3.0468	386.156	amacV14L	218
1341	67.36	-2.86627	386.117	amacV14L	218
1342	67.58	-3.36521	386.02	amacV14L	218
1343	67.86	-2.83658	386.16	amacV14L	218
1344	67.91	-2.87645	386.186	amacV14L	218
1345	68.04	-2.90476	386.201	amacV14L	218
1346	68.33	-3.11735	386.145	amacV14L	218
1347	68.52	-3.18916	386.159	amacV14L	218
1348	68.64	-3.31211	386.172	amacV14L	218
1349	68.9	-3.39203	386.183	amacV14L	218
1350	69.13	-3.16604	386.257	amacV14L	218
1351	69.29	-3.28387	386.227	amacV14L	218
1352	69.34	-2.9406	386.383	amacV14L	218
1353	69.56	-3.02713	386.383	amacV14L	218
1354	69.91	-2.88323	386.448	amacV14L	218
1355	70.01	-2.89159	386.453	amacV14L	218
1356	70.18	-2.75394	386.518	amacV14L	218
1357	70.38	-3.41903	386.353	amacV14L	218
1358	70.55	-3.59452	386.34	amacV14L	218
1359	70.78	-2.97906	386.512	amacV14L	218
1360	70.82	-3.04933	386.531	amacV14L	218
1361	71.13	-3.53315	386.423	amacV14L	218
1362	71.39	-3.44292	386.481	amacV14L	218
1363	71.54	-3.13223	386.609	amacV14L	218
1364	71.87	-3.48975	386.548	amacV14L	218
1365	72.08	-3.38375	386.595	amacV14L	218
1366	72.12	-3.17176	386.666	amacV14L	218
1367	72.29	-2.87786	386.771	amacV14L	218
1368	72.49	-2.91314	386.803	amacV14L	218
1369	72.69	-3.27857	386.769	amacV14L	218
1370	72.87	-2.72664	386.905	amacV14L	218
1371	72.98	-3.23832	386.819	amacV14L	218
1372	73.18	-3.0741	386.892	amacV14L	218
1373	73.44	-3.15714	386.91	amacV14L	218
1374	73.53	-3.58836	386.838	amacV14L	218
1375	73.64	-3.21101	386.942	amacV14L	218
1376	73.85	-2.57858	387.152	amacV14L	218
1377	74.13	-3.14484	387.053	amacV14L	218
1378	74.23	-3.15656	387.094	amacV14L	218
1379	74.33	-3.18169	387.12	amacV14L	218
1380	74.68	-2.85704	387.255	amacV14L	218
1381	74.86	-3.80877	387.048	amacV14L	218
1382	74.94	-3.01941	387.286	amacV14L	218
1383	75.08	-3.11659	387.444	amacV14L	218
1384	75.23	-3.17292	387.425	amacV14L	218
1385	75.52	-2.8358	387.533	amacV14L	218
1386	75.67	-3.27901	387.443	amacV14L	218
1387	75.77	-3.2488	387.517	amacV14L	218
1388	75.92	-2.92722	387.654	amacV14L	218
1389	76.22	-3.12321	387.689	amacV14L	218
1390	76.44	-3.21708	387.787	amacV14L	218
1391	76.55	-2.97926	388.061	amacV14L	218
1392	76.77	-3.12797	388.169	amacV14L	218
1393	76.96	-2.97992	388.391	amacV14L	218
1394	77.05	-3.14024	388.526	amacV14L	218
1395	77.34	-3.22352	388.747	amacV14L	218
1396	77.56	-2.61562	389.1	amacV14L	218
1397	77.65	-3.28817	389.184	amacV14L	218
1398	77.72	-2.87063	389.597	amacV14L	218
1399	77.98	-2.68118	389.956	amacV14L	218
1400	78.29	-2.93167	390.256	amacV14L	218
1401	78.38	-2.82198	390.688	amacV14L	218
1402	78.46	-2.52276	391.195	amacV14L	218
1403	78.63	-2.97268	391.453	amacV14L	218
1404	78.91	-2.57384	391.979	amacV14L	218
1405	79.14	-2.38111	392.409	amacV14L	218
1406	79.28	-2.7276	392.872	amacV14L	218
1407	79.49	-1.95589	393.4	amacV14L	218
1408	79.7	-2.23434	393.637	amacV14L	218
1409	79.84	-1.76076	394.039	amacV14L	218
1410	79.99	-2.42322	394.139	amacV14L	218
1411	80.09	-1.80695	394.51	amacV14L	218
1412	80.45	-1.33996	394.811	amacV14L	218
1413	80.65	-1.65949	394.881	amacV14L	218
1414	80.73	-1.7514	394.945	amacV14L	218
1415	80.86	-2.07185	394.932	amacV14L	218
1416	81.1	-1.52055	395.062	amacV14L	218
1417	81.23	-1.64465	395.081	amacV14L	218
1418	81.31	-1.15612	395.232	amacV14L	218
1419	81.57	-1.14774	395.147	amacV14L	218
1420	81.89	-1.00337	395.173	amacV14L	218
1421	82.06	-0.981525	395.094	amacV14L	218
1422	82.16	-1.20035	394.882	amacV14L	218
1423	82.37	-0.98626	394.824	amacV14L	218
1424	82.59	-0.888061	394.713	amacV14L	218
1425	82.64	-1.01958	394.586	amacV14L	218
1426	82.9	-0.723704	394.541	amacV14L	218
1427	83.22	-0.47008	394.453	amacV14L	218
1428	83.36	-0.102731	394.381	amacV14L	218
1429	83.6	-0.658652	394.157	amacV14L	218
1430	83.79	-0.518917	394.088	amacV14L	218
1431	83.97	-0.623114	393.992	amacV14L	218
1432	84.19	-0.352004	393.999	amacV14L	218
1433	84.3	-0.0511707	394.017	amacV14L	218
1434	84.49	-0.479537	393.856	amacV14L	218
1435	84.68	-0.750747	393.744	amacV14L	218
1436	84.81	-1.13063	393.617	amacV14L	218
1437	84.98	-0.676771	393.674	amacV14L	218
1438	85.15	-0.32372	393.719	amacV14L	218
1439	85.4	-0.642633	393.637	amacV14L	218
1440	85.54	-0.335027	393.641	amacV14L	218
1441	85.72	-0.773455	393.535	amacV14L	218
1442	85.93	-0.255007	393.635	amacV14L	218
1443	86.03	-0.832499	393.45	amacV14L	218
1444	86.21	-0.597172	393.456	amacV14L	218
1445	86.39	-0.432271	393.485	amacV14L	218
1446	86.73	-0.869544	393.349	amacV14L	218
1447	86.84	-0.527364	393.394	amacV14L	218
1448	87.13	-0.225214	393.382	amacV14L	218
1449	87.31	-0.231629	393.365	amacV14L	218
1450	87.42	-0.704123	393.195	amacV14L	218
1451	87.61	-0.279076	393.286	amacV14L	218
1452	87.81	-0.491404	393.204	amacV14L	218
1453	88.08	-0.17205	393.295	amacV14L	218
1454	88.27	-0.0399055	393.282	amacV14L	218
1455	88.3	-0.502512	393.081	amacV14L	218
1456	88.66	-0.763639	393.016	amacV14L	218
1457	88.83	-0.265576	393.149	amacV14L	218
1458	88.94	-0.233379	393.045	amacV14L	218
1459	89.07	-0.571081	392.986	amacV14L	218
1460	89.35	-0.295594	393.044	amacV14L	218
1461	89.54	-0.682506	392.928	amacV14L	218
1462	89.77	-0.510902	392.939	amacV14L	218
1463	89.86	-0.447253	392.742	amacV14L	218
1464	90.01	-0.358044	392.344	amacV14L	218
1465	90.27	-0.965048	392.546	amacV14L	218
1466	90.5	-0.413212	392.783	amacV14L	218
1467	90.55	-0.77705	392.559	amacV14L	218
1468	90.81	-0.776014	392.578	amacV14L	218
1469	91.06	-0.364	392.792	amacV14L	218
1470	91.12	-0.591283	392.795	amacV14L	218
1471	91.43	-0.694687	392.673	amacV14L	218
1472	91.69	-0.568992	392.716	amacV14L	218
1473	91.81	-0.253693	392.649	amacV14L	218
1474	91.92	-0.748474	392.385	amacV14L	218
1475	92.19	-0.815945	392.328	amacV14L	218
1476	92.45	-0.573907	392.491	amacV14L	218
1477	92.55	-0.33335	392.662	amacV14L	218
1478	92.68	-0.169545	392.791	amacV14L	218
1479	92.94	-0.586534	392.684	amacV14L	218
1480	93.19	-0.342957	392.672	amacV14L	218
1481	93.25	-0.700656	392.463	amacV14L	218
1482	93.52	-0.330616	392.497	amacV14L	218
1483	93.69	-0.685233	392.433	amacV14L	218
1484	93.92	-0.671295	392.538	amacV14L	218
1485	94.03	-0.341098	392.665	amacV14L	218
1486	94.28	-0.39008	392.711	amacV14L	218
1487	94.54	-0.474394	392.72	amacV14L	218
1488	94.66	-0.810665	392.681	amacV14L	218
1489	94.99	-0.254396	392.811	amacV14L	218
1490	95.12	-0.354712	392.768	amacV14L	218
1491	95.26	-0.178973	392.775	amacV14L	218
1492	95.36	-0.849937	392.612	amacV14L	218
1493	95.57	-0.429518	392.739	amacV14L	218
1494	95.84	-0.77501	392.67	amacV14L	218
1495	96.01	-0.330762	392.741	amacV14L	218
1496	96.11	-0.0487667	392.783	amacV14L	218
1497	96.24	-0.806701	392.777	amacV14L	218
1498	96.54	-0.39282	392.638	amacV14L	218
1499	96.66	-0.817711	392.443	amacV14L	218
1500	96.73	-1.10588	392.321	amacV14L	218
1501	97.05	-0.334667	392.562	amacV14L	218
1502	97.29	-0.0192891	392.878	amacV14L	218
1503	97.34	-0.47716	392.955	amacV14L	218
1504	97.56	-0.406228	393.061	amacV14L	218
1505	97.92	-0.388441	393.071	amacV14L	218
1506	98.08	-0.195461	393.098	amacV14L	218
1507	30	-3.63285	404.875	av	218
1508	30.15	-3.54032	404.752	av	218
1509	30.45	-4.16861	404.587	av	218
1510	30.67	-3.77593	404.687	av	218
1511	30.76	-4.09658	404.62	av	218
1512	30.99	-4.07085	404.622	av	218
1513	31.22	-4.54964	404.502	av	218
1514	31.34	-4.03963	404.655	av	218
1515	31.47	-3.80314	404.74	av	218
1516	31.7	-4.02701	404.664	av	218
1517	31.92	-3.73943	404.781	av	218
1518	32.06	-3.93857	404.728	av	218
1519	32.2	-3.80348	404.806	av	218
1520	32.4	-3.85058	404.805	av	218
1521	32.6	-3.62659	404.891	av	218
1522	32.76	-4.07108	404.803	av	218
1523	32.84	-3.49915	404.962	av	218
1524	33.08	-3.71605	404.945	av	218
1525	33.32	-3.50164	404.996	av	218
1526	33.45	-4.00496	404.839	av	218
1527	33.57	-3.46149	405.023	av	218
1528	33.79	-3.99615	404.896	av	218
1529	34	-4.15073	404.871	av	218
1530	34.15	-4.41875	404.87	av	218
1531	34.3	-3.92727	405.026	av	218
1532	34.49	-4.5887	404.867	av	218
1533	34.7	-4.20354	404.981	av	218
1534	34.81	-4.03658	405.068	av	218
1535	34.98	-3.77633	405.128	av	218
1536	35.2	-4.194	405.031	av	218
1537	35.4	-4.30348	404.995	av	218
1538	35.57	-4.06906	405.118	av	218
1539	35.72	-4.21768	405.086	av	218
1540	35.9	-4.16296	405.051	av	218
1541	36.12	-3.94892	405.072	av	218
1542	36.25	-3.72507	405.179	av	218
1543	36.37	-3.49072	405.264	av	218
1544	36.58	-3.57399	405.273	av	218
1545	36.79	-4.01775	405.185	av	218
1546	36.93	-3.74553	405.3	av	218
1547	37.09	-3.87868	405.301	av	218
1548	37.31	-3.72438	405.377	av	218
1549	37.52	-3.96109	405.365	av	218
1550	37.66	-4.00376	405.403	av	218
1551	37.78	-3.94898	405.412	av	218
1552	37.96	-3.67126	405.518	av	218
1553	38.17	-4.183	405.437	av	218
1554	38.33	-3.6627	405.586	av	218
1555	38.49	-3.84592	405.562	av	218
1556	38.71	-3.7646	405.601	av	218
1557	38.93	-3.98947	405.587	av	218
1558	39.01	-3.74293	405.66	av	218
1559	39.2	-3.71498	405.684	av	218
1560	39.41	-4.02453	405.669	av	218
1561	39.61	-4.16866	405.668	av	218
1562	39.81	-3.94588	405.75	av	218
1563	39.92	-4.37169	405.683	av	218
1564	40.08	-3.986	405.799	av	218
1565	40.3	-3.77288	405.757	av	218
1566	40.4	-3.84064	405.707	av	218
1567	40.55	-3.71994	405.786	av	218
1568	40.82	-4.05938	405.742	av	218
1569	41.04	-3.78447	405.799	av	218
1570	41.18	-4.0027	405.781	av	218
1571	41.31	-3.54942	405.913	av	218
1572	41.5	-3.69948	405.895	av	218
1573	41.73	-4.41674	405.777	av	218
1574	41.86	-3.85998	405.891	av	218
1575	41.99	-3.47819	406.031	av	218
1576	42.18	-3.45692	406.018	av	218
1577	42.39	-4.41015	405.785	av	218
1578	42.51	-4.4841	405.763	av	218
1579	42.69	-4.08934	405.839	av	218
1580	42.92	-4.3785	405.766	av	218
1581	43.12	-4.02579	405.895	av	218
1582	43.28	-3.54827	406.008	av	218
1583	43.39	-3.99857	405.947	av	218
1584	43.6	-3.98123	405.972	av	218
1585	43.81	-3.61182	406.106	av	218
1586	44.01	-4.16138	406.003	av	218
1587	44.13	-3.91591	406.031	av	218
1588	44.26	-3.83487	406.098	av	218
1589	44.52	-4.0593	406.016	av	218
1590	44.69	-4.1585	406.018	av	218
1591	44.77	-3.94762	406.105	av	218
1592	44.97	-3.82648	406.167	av	218
1593	45.23	-3.78753	406.214	av	218
1594	45.43	-3.7449	406.265	av	218
1595	45.51	-3.9899	406.232	av	218
1596	45.68	-4.13575	406.199	av	218
1597	45.92	-4.26563	406.172	av	218
1598	46.06	-4.04794	406.254	av	218
1599	46.17	-3.77964	406.342	av	218
1600	46.39	-3.99462	406.309	av	218
1601	46.62	-3.87619	406.38	av	218
1602	46.78	-3.64107	406.447	av	218
1603	46.9	-4.019	406.3	av	218
1604	47.07	-3.76055	406.407	av	218
1605	47.29	-3.92004	406.375	av	218
1606	47.53	-4.2413	406.331	av	218
1607	47.62	-4.2114	406.391	av	218
1608	47.76	-3.84053	406.495	av	218
1609	48	-4.06778	406.406	av	218
1610	48.16	-4.2619	406.356	av	218
1611	48.27	-3.87216	406.454	av	218
1612	48.49	-4.20133	406.38	av	218
1613	48.76	-4.22548	406.408	av	218
1614	48.91	-3.78936	406.537	av	218
1615	49.03	-4.05186	406.493	av	218
1616	49.18	-3.75003	406.619	av	218
1617	49.42	-4.20193	406.402	av	218
1618	49.59	-3.83971	406.479	av	218
1619	49.68	-3.94127	406.48	av	218
1620	49.9	-3.91562	406.475	av	218
1621	50.12	-3.98447	406.494	av	218
1622	50.23	-3.83598	406.587	av	218
1623	50.39	-3.90507	406.621	av	218
1624	50.6	-3.58893	406.655	av	218
1625	50.82	-3.84024	406.613	av	218
1626	51.05	-4.05362	406.511	av	218
1627	51.15	-3.58251	406.627	av	218
1628	51.39	-3.83259	406.611	av	218
1629	51.66	-3.89824	406.547	av	218
1630	51.72	-4.0559	406.479	av	218
1631	51.85	-3.87435	406.538	av	218
1632	52.07	-3.69471	406.621	av	218
1633	52.29	-3.76643	406.631	av	218
1634	52.41	-3.85851	406.633	av	218
1635	52.59	-3.72336	406.687	av	218
1636	52.83	-3.79731	406.677	av	218
1637	53.03	-3.65916	406.745	av	218
1638	53.16	-4.11546	406.618	av	218
1639	53.27	-4.18208	406.625	av	218
1640	53.52	-3.74423	406.76	av	218
1641	53.68	-3.71868	406.775	av	218
1642	53.77	-4.03432	406.742	av	218
1643	53.99	-3.86987	406.786	av	218
1644	54.22	-4.16307	406.757	av	218
1645	54.43	-4.19147	406.696	av	218
1646	54.6	-3.82449	406.852	av	218
1647	54.67	-3.59183	406.91	av	218
1648	54.87	-3.969	406.817	av	218
1649	55.1	-4.01598	406.828	av	218
1650	55.29	-3.46134	406.937	av	218
1651	55.4	-3.74341	406.897	av	218
1652	55.59	-3.84495	406.83	av	218
1653	55.85	-3.84004	406.838	av	218
1654	55.91	-3.7409	406.925	av	218
1655	56.06	-3.74567	406.904	av	218
1656	56.32	-4.11504	406.809	av	218
1657	56.55	-3.91946	406.868	av	218
1658	56.64	-4.38226	406.753	av	218
1659	56.8	-3.74813	406.943	av	218
1660	56.92	-4.21044	406.85	av	218
1661	57.2	-3.2614	407.113	av	218
1662	57.38	-3.93928	406.957	av	218
1663	57.53	-3.48742	407.09	av	218
1664	57.73	-3.85166	406.995	av	218
1665	57.93	-3.80318	407.05	av	218
1666	58.09	-3.695	407.059	av	218
1667	58.18	-3.97096	407.006	av	218
1668	58.36	-3.55656	407.146	av	218
1669	58.62	-3.94607	407.057	av	218
1670	58.81	-4.1099	407.035	av	218
1671	58.95	-3.71371	407.136	av	218
1672	59.24	-3.86951	407.148	av	218
1673	59.37	-3.86635	407.159	av	218
1674	59.49	-3.83061	407.164	av	218
1675	59.7	-3.8577	407.19	av	218
1676	59.91	-4.12888	407.123	av	218
1677	60.12	-3.75923	407.238	av	218
1678	60.29	-3.74729	407.24	av	218
1679	60.48	-4.28463	407.106	av	218
1680	60.69	-3.88945	407.248	av	218
1681	60.86	-3.49645	407.364	av	218
1682	61.03	-4.15066	407.268	av	218
1683	61.2	-3.94392	407.269	av	218
1684	61.4	-3.79956	407.328	av	218
1685	61.48	-4.06157	407.259	av	218
1686	61.67	-3.9863	407.333	av	218
1687	61.95	-4.08462	407.343	av	218
1688	62.12	-4.32604	407.294	av	218
1689	62.34	-3.96249	407.424	av	218
1690	62.4	-4.27888	407.228	av	218
1691	62.57	-3.71449	407.473	av	218
1692	62.83	-4.02197	407.434	av	218
1693	62.91	-3.87225	407.501	av	218
1694	63.06	-3.81016	407.524	av	218
1695	63.4	-3.97735	407.512	av	218
1696	63.54	-4.03503	407.532	av	218
1697	63.66	-4.01756	407.518	av	218
1698	63.76	-3.7997	407.599	av	218
1699	64	-3.65496	407.646	av	218
1700	64.21	-4.04323	407.601	av	218
1701	64.42	-3.81045	407.694	av	218
1702	64.51	-4.08868	407.63	av	218
1703	64.63	-3.93757	407.674	av	218
1704	64.86	-4.04975	407.693	av	218
1705	65.08	-4.24753	407.66	av	218
1706	65.16	-3.67649	407.805	av	218
1707	65.39	-3.56083	407.878	av	218
1708	65.67	-4.10654	407.768	av	218
1709	65.82	-3.72636	407.857	av	218
1710	65.9	-4.3224	407.754	av	218
1711	66.11	-3.6802	407.929	av	218
1712	66.34	-3.82976	407.922	av	218
1713	66.49	-3.76182	407.983	av	218
1714	66.61	-3.74349	407.954	av	218
1715	66.75	-3.77567	407.971	av	218
1716	67.01	-4.29717	407.868	av	218
1717	67.23	-4.25199	407.886	av	218
1718	67.35	-3.82219	407.998	av	218
1719	67.63	-3.90625	408.043	av	218
1720	67.81	-3.85796	407.997	av	218
1721	67.91	-4.03967	408.024	av	218
1722	68.08	-3.92308	408.073	av	218
1723	68.31	-3.52763	408.199	av	218
1724	68.56	-4.31456	408.024	av	218
1725	68.61	-3.92744	408.172	av	218
1726	68.8	-3.97374	408.142	av	218
1727	69.03	-3.43734	408.308	av	218
1728	69.23	-3.75092	408.273	av	218
1729	69.3	-3.93098	408.25	av	218
1730	69.47	-4.07718	408.219	av	218
1731	69.67	-4.06251	408.202	av	218
1732	69.94	-4.11049	408.227	av	218
1733	70.09	-3.7794	408.316	av	218
1734	70.2	-3.68294	408.381	av	218
1735	70.36	-3.50803	408.493	av	218
1736	70.62	-3.88077	408.404	av	218
1737	70.71	-3.76692	408.479	av	218
1738	70.86	-3.76183	408.465	av	218
1739	71.14	-4.29251	408.392	av	218
1740	71.32	-3.72347	408.542	av	218
1741	71.46	-3.69664	408.581	av	218
1742	71.57	-3.82154	408.558	av	218
1743	71.82	-3.71251	408.602	av	218
1744	72.05	-3.46909	408.693	av	218
1745	72.18	-4.19136	408.529	av	218
1746	72.25	-3.81344	408.665	av	218
1747	72.49	-3.95043	408.676	av	218
1748	72.74	-3.85005	408.691	av	218
1749	72.8	-3.36082	408.839	av	218
1750	72.98	-4.31775	408.632	av	218
1751	73.2	-3.5947	408.814	av	218
1752	73.47	-3.77483	408.806	av	218
1753	73.53	-3.92908	408.801	av	218
1754	73.6	-3.88372	408.828	av	218
1755	73.9	-4.25821	408.754	av	218
1756	74.16	-3.58676	408.938	av	218
1757	74.22	-3.86919	408.919	av	218
1758	74.34	-3.69265	408.993	av	218
1759	74.6	-3.67882	409.015	av	218
1760	74.83	-3.63078	409.034	av	218
1761	74.95	-3.80472	409.058	av	218
1762	75.26	-3.62049	409.158	av	218
1763	75.43	-3.40327	409.248	av	218
1764	75.62	-3.62043	409.238	av	218
1765	75.74	-3.98425	409.143	av	218
1766	75.83	-3.93653	409.217	av	218
1767	76.1	-4.32697	409.494	av	218
1768	76.31	-3.67316	409.497	av	218
1769	76.47	-3.88792	409.455	av	218
1770	76.72	-3.47886	409.541	av	218
1771	76.93	-3.69756	409.504	av	218
1772	77.08	-4.10117	409.445	av	218
1773	77.11	-3.91887	409.529	av	218
1774	77.32	-3.47519	409.681	av	218
1775	77.67	-3.83435	409.646	av	218
1776	77.88	-3.57878	409.777	av	218
1777	77.91	-3.71798	409.786	av	218
1778	78.07	-3.28425	409.94	av	218
1779	78.34	-3.36343	409.972	av	218
1780	78.4	-4.14307	409.813	av	218
1781	78.56	-3.7842	409.965	av	218
1782	78.78	-4.24662	409.896	av	218
1783	79.02	-3.4311	410.16	av	218
1784	79.23	-3.83295	410.097	av	218
1785	79.3	-4.06339	410.068	av	218
1786	79.46	-4.10874	410.162	av	218
1787	79.65	-4.02389	410.214	av	218
1788	79.82	-3.7783	410.294	av	218
1789	80.05	-4.15786	410.22	av	218
1790	80.25	-4.0941	410.289	av	218
1791	80.42	-3.89567	410.387	av	218
1792	80.62	-3.64151	410.487	av	218
1793	80.71	-3.51763	410.56	av	218
1794	80.99	-4.08279	410.438	av	218
1795	81.29	-3.46516	410.684	av	218
1796	81.37	-3.98944	410.568	av	218
1797	81.43	-3.89982	410.643	av	218
1798	81.73	-3.82552	410.718	av	218
1799	81.87	-3.9806	410.711	av	218
1800	81.93	-4.11774	410.74	av	218
1801	82.22	-3.45397	410.942	av	218
1802	82.39	-3.63698	410.959	av	218
1803	82.59	-4.19367	410.823	av	218
1804	82.75	-3.69523	411.017	av	218
1805	82.94	-3.77279	411.023	av	218
1806	83.15	-3.94892	410.988	av	218
1807	83.35	-4.3525	410.928	av	218
1808	83.41	-3.55859	411.141	av	218
1809	83.61	-3.78086	411.133	av	218
1810	83.79	-4.1634	411.06	av	218
1811	84.01	-4.09421	411.1	av	218
1812	84.13	-3.71037	411.236	av	218
1813	84.23	-3.63239	411.25	av	218
1814	84.5	-3.82281	411.24	av	218
1815	84.79	-3.74548	411.3	av	218
1816	84.85	-4.08164	411.206	av	218
1817	84.97	-3.90655	411.295	av	218
1818	85.17	-4.23597	411.224	av	218
1819	85.42	-3.81166	411.341	av	218
1820	85.59	-3.50889	411.496	av	218
1821	85.64	-3.86789	411.479	av	218
1822	85.88	-4.15507	411.437	av	218
1823	86.14	-3.79532	411.58	av	218
1824	86.23	-4.31695	411.553	av	218
1825	86.55	-4.10165	411.667	av	218
1826	86.81	-4.62057	411.621	av	218
1827	86.93	-3.88035	411.937	av	218
1828	87.12	-3.91856	412.025	av	218
1829	87.27	-4.44126	411.989	av	218
1830	87.53	-4.48175	412.106	av	218
1831	87.62	-4.05627	412.355	av	218
1832	87.75	-4.02923	412.458	av	218
1833	88.01	-4.10466	412.569	av	218
1834	88.25	-4.16571	412.649	av	218
1835	88.37	-4.43826	412.677	av	218
1836	88.49	-4.06941	412.898	av	218
1837	88.67	-4.10611	413.073	av	218
1838	88.92	-4.73893	413.014	av	218
1839	89.07	-3.91127	413.36	av	218
1840	89.12	-3.98497	413.412	av	218
1841	89.41	-3.83852	413.582	av	218
1842	89.67	-4.04227	413.625	av	218
1843	89.7	-4.05118	413.714	av	218
1844	89.88	-3.74569	413.901	av	218
1845	90.07	-3.66193	414	av	218
1846	90.26	-4.21671	413.902	av	218
1847	90.53	-3.8032	414.097	av	218
1848	90.64	-4.28227	414.027	av	218
1849	90.77	-3.40587	414.325	av	218
1850	91.04	-3.57062	414.308	av	218
1851	91.14	-3.53587	414.371	av	218
1852	91.3	-3.31013	414.463	av	218
1853	91.42	-3.64089	414.435	av	218
1854	91.74	-4.06191	414.375	av	218
1855	91.87	-3.53065	414.559	av	218
1856	91.97	-4.32368	414.352	av	218
1857	92.4	-4.04376	414.442	av	218
1858	92.53	-3.61714	414.61	av	218
1859	92.71	-3.72393	414.646	av	218
1860	92.97	-3.40564	414.738	av	218
1861	93.12	-3.56448	414.715	av	218
1862	93.22	-3.74319	414.736	av	218
1863	93.52	-3.97161	414.643	av	218
1864	93.77	-4.25548	414.606	av	218
1865	93.93	-3.58619	414.77	av	218
1866	94.02	-4.28568	414.618	av	218
1867	94.32	-3.96377	414.724	av	218
1868	94.6	-3.63689	414.808	av	218
1869	94.69	-4.1497	414.716	av	218
1870	94.71	-4.00757	414.796	av	218
1871	94.96	-3.5992	414.909	av	218
1872	95.27	-3.82562	414.894	av	218
1873	95.36	-3.99918	414.906	av	218
1874	95.67	-4.0993	414.894	av	218
1875	95.74	-4.02707	414.934	av	218
1876	95.93	-3.69663	415.045	av	218
1877	96.21	-3.79117	415.013	av	218
1878	96.37	-4.27299	414.933	av	218
1879	96.48	-3.451	415.113	av	218
1880	96.62	-3.49138	415.129	av	218
1881	96.84	-3.95834	415.064	av	218
1882	97.02	-4.0604	415.772	av	218
1883	97.17	-3.81525	415.999	av	218
1884	97.34	-3.96249	416.194	av	218
1885	97.56	-3.92637	416.784	av	218
1886	97.64	-3.46232	417.119	av	218
1887	97.91	-4.07628	417.198	av	218
1888	98.08	-3.867	417.491	av	218
1889	30.07	-1.39718	554.71	av	208
1890	30.2	-2.28793	554.625	av	208
1891	30.43	-2.86103	554.514	av	208
1892	30.69	-1.58724	554.912	av	208
1893	30.92	-1.06088	555.109	av	208
1894	31.03	-1.28763	555.139	av	208
1895	31.16	-1.16217	555.226	av	208
1896	31.4	-1.58475	555.21	av	208
1897	31.56	-1.64177	555.219	av	208
1898	31.69	-1.24958	555.376	av	208
1899	31.87	-1.7823	555.348	av	208
1900	32.1	-1.48734	555.49	av	208
1901	32.32	-0.566144	555.723	av	208
1902	32.41	-2.35157	555.403	av	208
1903	32.58	-0.749966	555.887	av	208
1904	32.78	-2.48926	555.507	av	208
1905	32.96	-2.34885	555.617	av	208
1906	33.07	-1.94299	555.837	av	208
1907	33.29	-2.2598	555.81	av	208
1908	33.51	-2.64954	555.793	av	208
1909	33.71	-2.79026	555.839	av	208
1910	33.82	-3.3521	555.824	av	208
1911	33.95	-1.09175	556.465	av	208
1912	34.2	-1.11124	556.563	av	208
1913	34.41	-1.9647	556.373	av	208
1914	34.53	-2.50493	556.314	av	208
1915	34.66	-2.37316	556.429	av	208
1916	34.88	-2.39213	556.481	av	208
1917	35.06	-1.5492	556.785	av	208
1918	35.16	-1.46308	556.916	av	208
1919	35.39	-3.04112	556.584	av	208
1920	35.63	-1.6857	557.093	av	208
1921	35.79	-1.49743	557.175	av	208
1922	35.94	-3.09608	556.862	av	208
1923	36.08	-1.16277	557.442	av	208
1924	36.32	-1.54189	557.457	av	208
1925	36.53	-1.78779	557.485	av	208
1926	36.65	-1.82405	557.613	av	208
1927	36.81	-0.538547	557.978	av	208
1928	36.98	-2.12407	557.661	av	208
1929	37.15	-2.46433	557.678	av	208
1930	37.33	-2.54113	557.734	av	208
1931	37.47	-1.64894	558.043	av	208
1932	37.7	-1.38878	558.166	av	208
1933	37.91	-0.797152	558.497	av	208
1934	38.08	-0.31829	558.668	av	208
1935	38.17	-1.50851	558.529	av	208
1936	38.38	-1.24389	558.644	av	208
1937	38.53	-1.76977	558.568	av	208
1938	38.7	-2.54947	558.505	av	208
1939	38.93	-1.36658	558.962	av	208
1940	39.16	-1.87012	558.96	av	208
1941	39.32	-0.937208	559.285	av	208
1942	39.46	-2.43025	559.087	av	208
1943	39.64	-0.889897	559.624	av	208
1944	39.91	-2.15416	559.411	av	208
1945	40.16	-1.57647	559.599	av	208
1946	40.25	-0.553791	559.974	av	208
1947	40.36	-1.75299	559.759	av	208
1948	40.59	-1.71537	559.948	av	208
1949	40.72	-1.7231	560.012	av	208
1950	40.89	-1.51375	560.19	av	208
1951	41.07	-2.64845	559.943	av	208
1952	41.34	-1.55807	560.299	av	208
1953	41.56	-0.896306	560.607	av	208
1954	41.6	-1.64985	560.526	av	208
1955	41.72	-2.21452	560.532	av	208
1956	42.01	-2.11265	560.552	av	208
1957	42.17	-1.82976	560.723	av	208
1958	42.3	-3.01844	560.544	av	208
1959	42.51	-1.5834	561.038	av	208
1960	42.72	-2.79114	560.792	av	208
1961	42.87	-2.93302	560.847	av	208
1962	43.02	-1.30882	561.365	av	208
1963	43.17	-1.57299	561.388	av	208
1964	43.4	0.270301	561.992	av	208
1965	43.61	-1.11739	561.746	av	208
1966	43.7	-2.16317	561.539	av	208
1967	43.89	-2.30369	561.619	av	208
1968	44.12	-1.72844	561.817	av	208
1969	44.28	-1.68056	561.943	av	208
1970	44.39	-3.36992	561.645	av	208
1971	44.61	-2.1402	562.089	av	208
1972	44.84	-2.15456	562.174	av	208
1973	44.95	-2.08135	562.284	av	208
1974	45.07	-1.1962	562.581	av	208
1975	45.29	-1.15614	562.553	av	208
1976	45.51	-1.18154	562.644	av	208
1977	45.72	-2.92842	562.348	av	208
1978	45.8	-2.37743	562.554	av	208
1979	45.99	-1.11377	563.029	av	208
1980	46.21	-1.59565	562.957	av	208
1981	46.37	1.65076	563.84	av	208
1982	46.49	-1.77161	563.148	av	208
1983	46.69	-1.82503	563.323	av	208
1984	46.9	-2.22084	563.247	av	208
1985	47.1	-1.93321	563.471	av	208
1986	47.22	-1.13051	563.764	av	208
1987	47.4	-0.964728	563.872	av	208
1988	47.6	-0.463612	564.122	av	208
1989	47.81	-1.19874	563.986	av	208
1990	47.91	-1.86644	563.899	av	208
1991	48.1	-2.71115	563.828	av	208
1992	48.32	-1.90787	564.164	av	208
1993	48.47	-1.32868	564.439	av	208
1994	48.55	-1.83615	564.384	av	208
1995	48.77	-2.4188	564.298	av	208
1996	48.99	-2.15822	564.542	av	208
1997	49.22	-2.51389	564.525	av	208
1998	49.3	-1.36195	564.943	av	208
[truncated: 269 more rows]

## Sheet: DSF
	temperature	gene	gfp_conc_mgml	unfolding_ratio	unfolding_ratio_deriv	unfolding_scatter	unfolding_scatter_deriv	refolding_ratio	refolding_ratio_deriv	refolding_scatter	refolding_scatter_deriv
0	20	pplu	1	0.635	-0.000245	88.897	-0.071716	0.588	0.000636	147.448	-0.085216
1	20.054	pplu	1	0.629	-0.000245	87.788	-0.071383	0.589	0.000636	146.977	-0.084996
2	20.108	pplu	1	0.63	-0.000245	87.784	-0.071033	0.587	0.000636	146.678	-0.084775
3	20.162	pplu	1	0.631	-0.000245	87.647	-0.070664	0.588	0.000636	146.599	-0.084552
4	20.216	pplu	1	0.633	-0.000245	87.926	-0.070277	0.587	0.000636	146.709	-0.084327
5	20.27	pplu	1	0.634	-0.000245	87.415	-0.069871	0.587	0.000637	146.945	-0.084101
6	20.324	pplu	1	0.631	-0.000245	87.684	-0.069446	0.591	0.000637	146.713	-0.083873
7	20.377	pplu	1	0.629	-0.000245	87.482	-0.069	0.59	0.000637	146.806	-0.083643
8	20.431	pplu	1	0.633	-0.000245	87.736	-0.068533	0.59	0.000637	146.97	-0.083411
9	20.485	pplu	1	0.627	-0.000245	88.139	-0.068045	0.59	0.000637	147.034	-0.083178
10	20.539	pplu	1	0.63	-0.000245	87.659	-0.067534	0.591	0.000637	146.934	-0.082943
11	20.593	pplu	1	0.631	-0.000245	87.556	-0.067001	0.589	0.000637	146.954	-0.082706
12	20.647	pplu	1	0.631	-0.000245	87.819	-0.066444	0.59	0.000637	147.229	-0.082467
13	20.701	pplu	1	0.629	-0.000245	87.905	-0.065864	0.59	0.000637	146.828	-0.082226
14	20.755	pplu	1	0.633	-0.000245	87.748	-0.065262	0.589	0.000638	146.999	-0.081984
15	20.809	pplu	1	0.63	-0.000245	87.981	-0.064637	0.59	0.000638	146.981	-0.08174
16	20.863	pplu	1	0.629	-0.000245	87.978	-0.063992	0.589	0.000638	146.949	-0.081494
17	20.917	pplu	1	0.632	-0.000245	87.516	-0.063327	0.587	0.000638	147.187	-0.081246
18	20.971	pplu	1	0.632	-0.000245	87.998	-0.062645	0.588	0.000638	146.957	-0.080996
19	21.025	pplu	1	0.631	-0.000245	88.202	-0.061949	0.589	0.000638	147.018	-0.080745
20	21.078	pplu	1	0.63	-0.000245	87.896	-0.061239	0.59	0.000638	147.194	-0.080492
21	21.132	pplu	1	0.631	-0.000245	87.752	-0.060519	0.59	0.000638	147.009	-0.080238
22	21.186	pplu	1	0.632	-0.000245	87.648	-0.059792	0.59	0.000638	147.065	-0.079982
23	21.24	pplu	1	0.632	-0.000245	87.806	-0.059059	0.59	0.000639	147.099	-0.079724
24	21.294	pplu	1	0.631	-0.000245	87.983	-0.058324	0.59	0.000639	146.975	-0.079465
25	21.348	pplu	1	0.633	-0.000245	87.626	-0.057589	0.589	0.000639	147.004	-0.079204
26	21.402	pplu	1	0.632	-0.000245	87.571	-0.056857	0.589	0.000639	146.909	-0.078941
27	21.456	pplu	1	0.631	-0.000245	88.059	-0.05613	0.589	0.000639	146.778	-0.078677
28	21.51	pplu	1	0.632	-0.000245	87.76	-0.055412	0.589	0.000639	146.836	-0.078412
29	21.564	pplu	1	0.629	-0.000245	87.713	-0.054705	0.59	0.000639	146.729	-0.078145
30	21.618	pplu	1	0.628	-0.000245	87.8	-0.05401	0.59	0.000639	146.728	-0.077877
31	21.672	pplu	1	0.632	-0.000245	87.57	-0.053332	0.588	0.00064	146.888	-0.077608
32	21.726	pplu	1	0.632	-0.000245	87.383	-0.052671	0.589	0.00064	146.931	-0.077337
33	21.78	pplu	1	0.632	-0.000245	87.854	-0.052032	0.593	0.00064	146.883	-0.077066
34	21.833	pplu	1	0.628	-0.000245	87.805	-0.051416	0.591	0.00064	147.075	-0.076793
35	21.887	pplu	1	0.628	-0.000245	87.752	-0.050827	0.59	0.00064	147.053	-0.076519
36	21.941	pplu	1	0.629	-0.000245	87.591	-0.05027	0.59	0.00064	146.764	-0.076244
37	21.995	pplu	1	0.632	-0.000245	87.732	-0.049746	0.589	0.00064	146.935	-0.075968
38	22.049	pplu	1	0.63	-0.000245	87.809	-0.04926	0.59	0.00064	146.773	-0.075691
39	22.103	pplu	1	0.632	-0.000245	88.053	-0.048816	0.59	0.000641	147.002	-0.075413
40	22.157	pplu	1	0.633	-0.000245	87.754	-0.048418	0.593	0.000641	147.354	-0.075135
41	22.211	pplu	1	0.633	-0.000245	87.697	-0.048068	0.589	0.000641	146.902	-0.074856
42	22.265	pplu	1	0.633	-0.000245	87.567	-0.047771	0.591	0.000641	146.766	-0.074576
43	22.319	pplu	1	0.633	-0.000245	87.352	-0.047531	0.589	0.000641	146.991	-0.074296
44	22.373	pplu	1	0.631	-0.000245	87.434	-0.04735	0.59	0.000641	146.745	-0.074016
45	22.427	pplu	1	0.632	-0.000245	87.519	-0.047234	0.589	0.000641	147.355	-0.073735
46	22.481	pplu	1	0.631	-0.000245	87.468	-0.047183	0.591	0.000641	147.328	-0.073453
47	22.534	pplu	1	0.632	-0.000245	87.639	-0.047203	0.591	0.000641	147.085	-0.073172
48	22.588	pplu	1	0.631	-0.000245	87.641	-0.047294	0.591	0.000642	147.1	-0.07289
49	22.642	pplu	1	0.63	-0.000245	87.546	-0.047457	0.59	0.000642	146.885	-0.072608
50	22.696	pplu	1	0.632	-0.000245	87.794	-0.04769	0.591	0.000642	146.884	-0.072325
51	22.75	pplu	1	0.633	-0.000245	87.683	-0.047992	0.59	0.000642	147.143	-0.072042
52	22.804	pplu	1	0.631	-0.000245	87.447	-0.048353	0.593	0.000642	146.891	-0.071758
53	22.858	pplu	1	0.629	-0.000245	87.461	-0.048763	0.591	0.000642	146.818	-0.071472
54	22.912	pplu	1	0.629	-0.000245	87.192	-0.049201	0.589	0.000642	146.782	-0.071183
55	22.966	pplu	1	0.631	-0.000245	87.304	-0.049637	0.589	0.000642	146.152	-0.07089
56	23.02	pplu	1	0.63	-0.000245	87.573	-0.050027	0.588	0.000642	146.718	-0.07059
57	23.074	pplu	1	0.632	-0.000245	87.513	-0.050307	0.59	0.000643	146.772	-0.070281
58	23.128	pplu	1	0.63	-0.000245	87.334	-0.050868	0.592	0.000642	146.771	-0.069935
59	23.182	pplu	1	0.631	-0.000245	87.318	-0.051338	0.59	0.000642	147.013	-0.069574
60	23.235	pplu	1	0.631	-0.000245	87.391	-0.051684	0.592	0.000642	146.831	-0.06922
61	23.289	pplu	1	0.629	-0.000245	87.51	-0.051878	0.591	0.000642	146.822	-0.068874
62	23.343	pplu	1	0.63	-0.000245	87.808	-0.051896	0.591	0.000642	146.525	-0.068538
63	23.397	pplu	1	0.629	-0.000245	87.77	-0.051713	0.592	0.000641	146.724	-0.068213
64	23.451	pplu	1	0.628	-0.000245	87.466	-0.051312	0.59	0.000641	146.584	-0.067901
65	23.505	pplu	1	0.63	-0.000245	87.402	-0.050679	0.593	0.000641	146.65	-0.067602
66	23.559	pplu	1	0.632	-0.000245	87.659	-0.04981	0.592	0.00064	146.643	-0.067318
67	23.613	pplu	1	0.631	-0.000245	87.957	-0.048703	0.59	0.00064	146.548	-0.06705
68	23.667	pplu	1	0.63	-0.000245	87.905	-0.04737	0.592	0.000639	146.795	-0.066797
69	23.721	pplu	1	0.631	-0.000245	87.638	-0.045824	0.592	0.000639	146.811	-0.066562
70	23.775	pplu	1	0.632	-0.000245	87.649	-0.044087	0.591	0.000638	146.93	-0.066344
71	23.829	pplu	1	0.632	-0.000245	87.856	-0.042182	0.591	0.000637	146.823	-0.066144
72	23.883	pplu	1	0.632	-0.000245	87.767	-0.040133	0.591	0.000637	146.675	-0.065963
73	23.936	pplu	1	0.63	-0.000245	87.891	-0.037969	0.59	0.000636	146.643	-0.065802
74	23.99	pplu	1	0.631	-0.000245	87.864	-0.035717	0.591	0.000635	146.536	-0.06566
75	24.044	pplu	1	0.631	-0.000245	87.576	-0.033408	0.592	0.000635	146.534	-0.065539
76	24.098	pplu	1	0.632	-0.000245	87.614	-0.03107	0.591	0.000634	146.779	-0.065438
77	24.152	pplu	1	0.631	-0.000245	87.911	-0.028732	0.59	0.000633	146.93	-0.06536
78	24.206	pplu	1	0.632	-0.000245	87.768	-0.026426	0.591	0.000633	146.587	-0.065303
79	24.26	pplu	1	0.631	-0.000245	87.919	-0.024181	0.591	0.000632	146.379	-0.065268
80	24.314	pplu	1	0.63	-0.000245	87.855	-0.022029	0.591	0.000631	146.429	-0.065256
81	24.368	pplu	1	0.63	-0.000245	87.586	-0.020001	0.591	0.000631	146.537	-0.065268
82	24.422	pplu	1	0.63	-0.000245	87.551	-0.018128	0.592	0.00063	146.779	-0.065302
83	24.476	pplu	1	0.631	-0.000245	87.33	-0.01644	0.592	0.000629	146.665	-0.065361
84	24.53	pplu	1	0.632	-0.000245	87.595	-0.014971	0.592	0.000629	146.666	-0.065443
85	24.584	pplu	1	0.63	-0.000245	87.814	-0.013748	0.594	0.000628	146.798	-0.065549
86	24.638	pplu	1	0.63	-0.000245	87.387	-0.0128	0.592	0.000628	146.496	-0.06568
87	24.691	pplu	1	0.628	-0.000245	87.541	-0.012151	0.589	0.000627	146.624	-0.065833
88	24.745	pplu	1	0.631	-0.000245	87.385	-0.01182	0.593	0.000627	146.657	-0.06601
89	24.799	pplu	1	0.632	-0.000245	87.174	-0.011821	0.592	0.000626	146.66	-0.066209
90	24.853	pplu	1	0.628	-0.000245	87.736	-0.012158	0.591	0.000626	146.66	-0.06643
91	24.907	pplu	1	0.633	-0.000245	87.619	-0.012829	0.593	0.000625	146.808	-0.066671
92	24.961	pplu	1	0.63	-0.000245	87.295	-0.013824	0.593	0.000625	146.729	-0.066931
93	25.015	pplu	1	0.629	-0.000245	87.31	-0.015123	0.592	0.000624	146.664	-0.067209
94	25.069	pplu	1	0.633	-0.000245	87.864	-0.016699	0.594	0.000624	146.732	-0.067502
95	25.123	pplu	1	0.633	-0.000245	87.813	-0.018519	0.592	0.000624	146.827	-0.067809
96	25.177	pplu	1	0.632	-0.000245	87.644	-0.020544	0.595	0.000623	146.878	-0.068128
97	25.231	pplu	1	0.63	-0.000245	88.034	-0.022731	0.594	0.000623	146.994	-0.068456
98	25.285	pplu	1	0.631	-0.000245	87.464	-0.025035	0.592	0.000622	146.551	-0.068791
99	25.339	pplu	1	0.631	-0.000245	87.46	-0.027412	0.592	0.000622	146.461	-0.069131
100	25.392	pplu	1	0.628	-0.000245	87.461	-0.029816	0.592	0.000622	146.875	-0.069474
101	25.446	pplu	1	0.633	-0.000245	87.552	-0.032201	0.591	0.000622	146.904	-0.069816
102	25.5	pplu	1	0.629	-0.000245	87.678	-0.034525	0.595	0.000621	146.73	-0.070156
103	25.554	pplu	1	0.629	-0.000245	87.738	-0.036747	0.592	0.000621	147.08	-0.07049
104	25.608	pplu	1	0.632	-0.000245	87.522	-0.038828	0.593	0.000621	146.693	-0.070816
105	25.662	pplu	1	0.628	-0.000245	87.14	-0.040731	0.595	0.00062	147.004	-0.071133
106	25.716	pplu	1	0.63	-0.000245	87.144	-0.042424	0.593	0.00062	146.8	-0.071438
107	25.77	pplu	1	0.63	-0.000245	87.517	-0.043881	0.591	0.00062	146.862	-0.07173
108	25.824	pplu	1	0.629	-0.000245	87.412	-0.04508	0.593	0.00062	147.012	-0.072006
109	25.878	pplu	1	0.63	-0.000246	87.564	-0.046008	0.593	0.000619	146.791	-0.072264
110	25.932	pplu	1	0.629	-0.000246	87.578	-0.046652	0.592	0.000619	146.396	-0.072503
111	25.986	pplu	1	0.629	-0.000246	87.238	-0.047009	0.592	0.000619	146.414	-0.072722
112	26.04	pplu	1	0.633	-0.000246	87.406	-0.04708	0.591	0.000619	146.579	-0.072918
113	26.093	pplu	1	0.631	-0.000246	87.674	-0.046873	0.593	0.000618	146.556	-0.073091
114	26.147	pplu	1	0.63	-0.000246	87.534	-0.046401	0.592	0.000618	146.778	-0.073241
115	26.201	pplu	1	0.631	-0.000246	87.642	-0.045682	0.591	0.000618	146.646	-0.073366
116	26.255	pplu	1	0.629	-0.000246	87.311	-0.044737	0.593	0.000617	146.396	-0.073466
117	26.309	pplu	1	0.627	-0.000246	87.246	-0.043594	0.593	0.000617	146.62	-0.07354
118	26.363	pplu	1	0.629	-0.000247	87.357	-0.042286	0.594	0.000617	146.623	-0.073589
119	26.417	pplu	1	0.63	-0.000247	87.624	-0.04085	0.594	0.000617	146.396	-0.073613
120	26.471	pplu	1	0.631	-0.000247	87.646	-0.039321	0.594	0.000616	146.447	-0.073611
121	26.525	pplu	1	0.631	-0.000247	87.693	-0.037737	0.594	0.000616	146.673	-0.073583
122	26.579	pplu	1	0.63	-0.000247	87.773	-0.036131	0.593	0.000616	146.743	-0.073529
123	26.633	pplu	1	0.628	-0.000247	87.66	-0.034539	0.593	0.000616	146.828	-0.07345
124	26.687	pplu	1	0.627	-0.000248	87.494	-0.032996	0.595	0.000615	146.996	-0.073345
125	26.741	pplu	1	0.628	-0.000248	87.556	-0.031534	0.593	0.000615	146.814	-0.073216
126	26.794	pplu	1	0.631	-0.000248	87.844	-0.030186	0.592	0.000615	146.584	-0.073062
127	26.848	pplu	1	0.63	-0.000248	87.728	-0.02898	0.591	0.000615	146.741	-0.072884
128	26.902	pplu	1	0.628	-0.000248	87.417	-0.027941	0.593	0.000615	146.816	-0.072683
129	26.956	pplu	1	0.63	-0.000249	87.48	-0.027093	0.593	0.000615	146.788	-0.072459
130	27.01	pplu	1	0.629	-0.000249	87.678	-0.026455	0.593	0.000615	146.458	-0.072213
131	27.064	pplu	1	0.63	-0.000249	87.549	-0.026041	0.593	0.000615	146.141	-0.071945
132	27.118	pplu	1	0.629	-0.000249	87.503	-0.025862	0.594	0.000615	146.164	-0.071657
133	27.172	pplu	1	0.628	-0.000249	87.606	-0.025921	0.593	0.000615	146.472	-0.071349
134	27.226	pplu	1	0.628	-0.00025	87.741	-0.026217	0.594	0.000616	146.837	-0.071022
135	27.28	pplu	1	0.627	-0.00025	87.783	-0.026745	0.592	0.000616	146.844	-0.070677
136	27.334	pplu	1	0.628	-0.00025	87.533	-0.027496	0.591	0.000616	146.864	-0.070314
137	27.388	pplu	1	0.629	-0.00025	87.333	-0.028458	0.594	0.000617	146.777	-0.069936
138	27.442	pplu	1	0.63	-0.00025	87.507	-0.029611	0.595	0.000617	146.437	-0.069542
139	27.496	pplu	1	0.63	-0.00025	87.674	-0.030931	0.596	0.000618	146.473	-0.069134
140	27.549	pplu	1	0.63	-0.000251	87.506	-0.032388	0.594	0.000618	146.198	-0.068714
141	27.603	pplu	1	0.631	-0.000251	87.302	-0.033953	0.592	0.000619	146.032	-0.068281
142	27.657	pplu	1	0.629	-0.000251	87.225	-0.035595	0.593	0.00062	146.379	-0.067838
143	27.711	pplu	1	0.628	-0.000251	87.225	-0.037287	0.594	0.00062	146.617	-0.067386
144	27.765	pplu	1	0.63	-0.000251	87.177	-0.038998	0.593	0.000621	146.494	-0.066926
145	27.819	pplu	1	0.63	-0.000252	87.099	-0.040704	0.595	0.000622	146.543	-0.06646
146	27.873	pplu	1	0.63	-0.000252	87.238	-0.042382	0.593	0.000623	146.331	-0.06599
147	27.927	pplu	1	0.631	-0.000252	87.289	-0.044013	0.594	0.000624	145.926	-0.065516
148	27.981	pplu	1	0.63	-0.000252	87.548	-0.045576	0.596	0.000625	145.977	-0.065043
149	28.035	pplu	1	0.631	-0.000252	87.485	-0.047054	0.594	0.000626	146.174	-0.06457
150	28.089	pplu	1	0.631	-0.000253	87.457	-0.048427	0.594	0.000627	146.1	-0.064101
151	28.143	pplu	1	0.629	-0.000253	87.478	-0.04968	0.595	0.000628	146.183	-0.063638
152	28.197	pplu	1	0.628	-0.000253	87.526	-0.0508	0.594	0.000629	146.266	-0.063182
153	28.25	pplu	1	0.628	-0.000253	87.67	-0.051777	0.595	0.00063	146.298	-0.062736
154	28.304	pplu	1	0.628	-0.000253	87.688	-0.052605	0.594	0.000631	146.365	-0.062302
155	28.358	pplu	1	0.629	-0.000254	87.321	-0.05328	0.591	0.000632	146.152	-0.061881
156	28.412	pplu	1	0.628	-0.000254	87.411	-0.053797	0.593	0.000633	146.237	-0.061475
157	28.466	pplu	1	0.628	-0.000254	87.467	-0.054151	0.594	0.000634	146.46	-0.061086
158	28.52	pplu	1	0.631	-0.000254	87.552	-0.05434	0.594	0.000635	146.57	-0.060716
159	28.574	pplu	1	0.631	-0.000255	87.672	-0.054366	0.595	0.000637	146.412	-0.060367
160	28.628	pplu	1	0.631	-0.000255	87.527	-0.054231	0.593	0.000638	146.707	-0.060039
161	28.682	pplu	1	0.629	-0.000255	87.755	-0.053944	0.593	0.000639	146.322	-0.059735
162	28.736	pplu	1	0.628	-0.000256	87.619	-0.053517	0.594	0.00064	146.373	-0.059455
163	28.79	pplu	1	0.629	-0.000256	87.607	-0.052964	0.592	0.000642	146.554	-0.059201
164	28.844	pplu	1	0.626	-0.000256	87.567	-0.052309	0.592	0.000643	146.386	-0.058973
165	28.898	pplu	1	0.63	-0.000256	87.487	-0.051575	0.592	0.000644	146.604	-0.058772
166	28.951	pplu	1	0.633	-0.000257	87.201	-0.050791	0.591	0.000646	146.514	-0.058599
167	29.005	pplu	1	0.627	-0.000257	87.63	-0.049984	0.595	0.000647	146.356	-0.058456
168	29.059	pplu	1	0.629	-0.000257	87.644	-0.04918	0.596	0.000648	146.397	-0.058342
169	29.113	pplu	1	0.63	-0.000258	87.145	-0.04841	0.595	0.00065	146.439	-0.058259
170	29.167	pplu	1	0.629	-0.000258	87.275	-0.047702	0.595	0.000651	146.377	-0.058208
171	29.221	pplu	1	0.63	-0.000258	87.598	-0.047087	0.592	0.000653	146.241	-0.05819
172	29.275	pplu	1	0.629	-0.000259	87.36	-0.046594	0.594	0.000655	146.382	-0.058204
173	29.329	pplu	1	0.63	-0.000259	87.262	-0.046248	0.594	0.000656	146.352	-0.058252
174	29.383	pplu	1	0.627	-0.000259	87.406	-0.046066	0.596	0.000658	146.429	-0.058336
175	29.437	pplu	1	0.631	-0.000259	87.476	-0.046063	0.593	0.00066	146.308	-0.058454
176	29.491	pplu	1	0.629	-0.00026	87.19	-0.046243	0.593	0.000662	146.232	-0.058609
177	29.545	pplu	1	0.628	-0.00026	87.422	-0.046608	0.593	0.000664	146.362	-0.058801
178	29.599	pplu	1	0.629	-0.00026	87.584	-0.047153	0.593	0.000666	146.406	-0.059032
179	29.652	pplu	1	0.627	-0.00026	87.432	-0.047867	0.595	0.000668	146.401	-0.0593
180	29.706	pplu	1	0.627	-0.000261	87.393	-0.048734	0.596	0.000671	146.332	-0.059608
181	29.76	pplu	1	0.628	-0.000261	87.307	-0.049733	0.594	0.000673	146.18	-0.059954
182	29.814	pplu	1	0.627	-0.000261	87.119	-0.050843	0.596	0.000675	146.458	-0.060338
183	29.868	pplu	1	0.631	-0.000261	87.535	-0.052038	0.595	0.000678	146.476	-0.060761
184	29.922	pplu	1	0.627	-0.000261	87.666	-0.053293	0.596	0.00068	146.355	-0.061219
185	29.976	pplu	1	0.627	-0.000262	87.452	-0.05458	0.595	0.000683	146.32	-0.061713
186	30.03	pplu	1	0.628	-0.000262	87.197	-0.05587	0.595	0.000686	146.406	-0.06224
187	30.084	pplu	1	0.625	-0.000262	86.902	-0.057133	0.598	0.000689	146.478	-0.062798
188	30.138	pplu	1	0.627	-0.000262	87.171	-0.058343	0.599	0.000691	146.553	-0.063385
189	30.192	pplu	1	0.629	-0.000262	87.319	-0.059474	0.597	0.000694	146.57	-0.063999
190	30.246	pplu	1	0.63	-0.000263	87.355	-0.0605	0.595	0.000697	146.507	-0.064636
191	30.3	pplu	1	0.628	-0.000263	87.199	-0.0614	0.595	0.0007	146.495	-0.065293
192	30.354	pplu	1	0.629	-0.000263	87.476	-0.062149	0.595	0.000703	146.614	-0.065969
193	30.407	pplu	1	0.628	-0.000263	87.294	-0.062726	0.596	0.000707	146.743	-0.066659
194	30.461	pplu	1	0.632	-0.000263	87.257	-0.063107	0.597	0.00071	146.591	-0.06736
195	30.515	pplu	1	0.628	-0.000263	87.264	-0.063275	0.597	0.000713	146.579	-0.06807
196	30.569	pplu	1	0.63	-0.000263	87.007	-0.063212	0.596	0.000716	146.621	-0.068785
197	30.623	pplu	1	0.63	-0.000263	87.183	-0.062907	0.597	0.000719	146.37	-0.069503
198	30.677	pplu	1	0.628	-0.000264	87.355	-0.062354	0.596	0.000722	146.412	-0.070219
199	30.731	pplu	1	0.629	-0.000264	87.183	-0.061557	0.596	0.000726	146.489	-0.070933
200	30.785	pplu	1	0.629	-0.000264	87.373	-0.060528	0.597	0.000729	146.386	-0.07164
201	30.839	pplu	1	0.629	-0.000264	87.461	-0.059284	0.596	0.000732	146.301	-0.072338
202	30.893	pplu	1	0.627	-0.000264	87.266	-0.057854	0.595	0.000735	146.706	-0.073024
203	30.947	pplu	1	0.629	-0.000265	87.423	-0.056268	0.596	0.000738	146.586	-0.073697
204	31.001	pplu	1	0.629	-0.000265	87.473	-0.054565	0.596	0.000741	146.16	-0.074354
205	31.055	pplu	1	0.626	-0.000265	87.317	-0.052785	0.596	0.000744	146.305	-0.074993
206	31.108	pplu	1	0.628	-0.000265	87.391	-0.050969	0.596	0.000746	146.377	-0.07561
207	31.162	pplu	1	0.628	-0.000265	87.477	-0.04916	0.596	0.000749	146.277	-0.076206
208	31.216	pplu	1	0.628	-0.000266	87.309	-0.0474	0.596	0.000752	146.53	-0.076777
209	31.27	pplu	1	0.629	-0.000266	87.525	-0.045729	0.594	0.000754	146.303	-0.077324
210	31.324	pplu	1	0.63	-0.000266	87.608	-0.044185	0.595	0.000757	146.572	-0.077843
211	31.378	pplu	1	0.628	-0.000267	87.565	-0.042801	0.596	0.00076	146.515	-0.078334
212	31.432	pplu	1	0.629	-0.000267	87.528	-0.041601	0.596	0.000762	146.231	-0.078797
213	31.486	pplu	1	0.627	-0.000267	87.426	-0.040603	0.599	0.000764	146.072	-0.079231
214	31.54	pplu	1	0.63	-0.000267	87.346	-0.039816	0.597	0.000767	145.91	-0.079634
215	31.594	pplu	1	0.63	-0.000268	87.256	-0.039243	0.596	0.000769	146.15	-0.080008
216	31.648	pplu	1	0.628	-0.000268	87.124	-0.038878	0.598	0.000771	146.223	-0.080352
217	31.702	pplu	1	0.63	-0.000269	87.365	-0.038711	0.597	0.000773	146.467	-0.080666
218	31.756	pplu	1	0.63	-0.000269	87.259	-0.038727	0.597	0.000775	146.387	-0.08095
219	31.809	pplu	1	0.629	-0.000269	87.161	-0.038908	0.596	0.000778	146.121	-0.081205
220	31.863	pplu	1	0.63	-0.00027	87.461	-0.03923	0.596	0.00078	145.976	-0.08143
221	31.917	pplu	1	0.63	-0.00027	87.371	-0.039671	0.595	0.000782	146.056	-0.081626
222	31.971	pplu	1	0.629	-0.000271	87.125	-0.040204	0.595	0.000784	146.177	-0.081794
223	32.025	pplu	1	0.629	-0.000271	87.177	-0.040807	0.597	0.000786	146.115	-0.081933
224	32.079	pplu	1	0.627	-0.000271	87.124	-0.041454	0.597	0.000788	146.162	-0.082046
225	32.133	pplu	1	0.625	-0.000272	87.082	-0.042123	0.595	0.000789	146.186	-0.082133
226	32.187	pplu	1	0.627	-0.000272	87.242	-0.042792	0.597	0.000791	145.803	-0.082194
227	32.241	pplu	1	0.629	-0.000273	87.144	-0.043445	0.594	0.000793	145.945	-0.08223
228	32.295	pplu	1	0.629	-0.000273	86.922	-0.044068	0.596	0.000795	146.063	-0.082243
229	32.349	pplu	1	0.628	-0.000274	86.864	-0.044654	0.597	0.000797	146.168	-0.082234
230	32.403	pplu	1	0.626	-0.000274	87.029	-0.045195	0.596	0.000799	146.084	-0.082203
231	32.457	pplu	1	0.628	-0.000274	87.105	-0.045687	0.597	0.000801	145.873	-0.082152
232	32.51	pplu	1	0.631	-0.000275	86.98	-0.046128	0.595	0.000802	145.599	-0.082082
233	32.564	pplu	1	0.631	-0.000275	86.896	-0.046512	0.597	0.000804	145.811	-0.081995
234	32.618	pplu	1	0.63	-0.000276	87.272	-0.046836	0.597	0.000806	146.045	-0.081892
235	32.672	pplu	1	0.629	-0.000276	87.448	-0.047095	0.596	0.000808	146.039	-0.081774
236	32.726	pplu	1	0.628	-0.000277	87.222	-0.04728	0.596	0.000809	146.021	-0.081642
237	32.78	pplu	1	0.627	-0.000277	87.179	-0.047382	0.595	0.000811	146.062	-0.081498
238	32.834	pplu	1	0.629	-0.000278	87.319	-0.04739	0.597	0.000813	146.102	-0.081344
239	32.888	pplu	1	0.629	-0.000278	87.398	-0.047292	0.597	0.000814	146.095	-0.081179
240	32.942	pplu	1	0.628	-0.000279	87.429	-0.047078	0.597	0.000816	146.152	-0.081006
241	32.996	pplu	1	0.628	-0.000279	87.33	-0.046741	0.597	0.000818	146.125	-0.080824
242	33.05	pplu	1	0.63	-0.000279	87.434	-0.046276	0.597	0.000819	145.957	-0.080637
243	33.104	pplu	1	0.627	-0.00028	87.335	-0.045686	0.598	0.00082	146.074	-0.080444
244	33.158	pplu	1	0.629	-0.00028	87.232	-0.044975	0.597	0.000822	146.164	-0.080246
245	33.212	pplu	1	0.629	-0.000281	87.302	-0.044153	0.597	0.000823	146.052	-0.080045
246	33.265	pplu	1	0.629	-0.000281	87.269	-0.04323	0.597	0.000824	146.223	-0.079842
247	33.319	pplu	1	0.628	-0.000282	87.266	-0.04222	0.598	0.000825	146.183	-0.079636
248	33.373	pplu	1	0.628	-0.000282	87.396	-0.041142	0.598	0.000826	146.108	-0.079428
249	33.427	pplu	1	0.628	-0.000283	87.599	-0.040017	0.598	0.000827	146.242	-0.07922
250	33.481	pplu	1	0.627	-0.000283	87.332	-0.038869	0.6	0.000828	146.32	-0.07901
251	33.535	pplu	1	0.627	-0.000284	87.06	-0.037722	0.598	0.000829	146.249	-0.0788
252	33.589	pplu	1	0.628	-0.000285	87.459	-0.036606	0.599	0.000829	146.386	-0.07859
253	33.643	pplu	1	0.63	-0.000285	87.06	-0.035547	0.598	0.00083	146.235	-0.078381
254	33.697	pplu	1	0.627	-0.000286	87.351	-0.034572	0.596	0.00083	146.122	-0.078172
255	33.751	pplu	1	0.627	-0.000286	87.323	-0.033705	0.596	0.00083	146.275	-0.077963
256	33.805	pplu	1	0.627	-0.000287	87.093	-0.032964	0.596	0.000831	145.996	-0.077755
257	33.859	pplu	1	0.629	-0.000287	87.074	-0.032365	0.6	0.000831	145.802	-0.077548
258	33.913	pplu	1	0.628	-0.000288	87.318	-0.031921	0.6	0.00083	145.925	-0.077342
259	33.966	pplu	1	0.626	-0.000289	87.189	-0.031644	0.599	0.00083	145.894	-0.077136
260	34.02	pplu	1	0.63	-0.000289	87.013	-0.031544	0.597	0.00083	145.907	-0.076933
261	34.074	pplu	1	0.629	-0.00029	87.07	-0.031629	0.599	0.00083	146.168	-0.076731
262	34.128	pplu	1	0.627	-0.00029	87.157	-0.031903	0.599	0.000829	145.889	-0.076532
263	34.182	pplu	1	0.626	-0.000291	86.682	-0.032364	0.598	0.000828	145.998	-0.076335
264	34.236	pplu	1	0.63	-0.000292	86.959	-0.033005	0.597	0.000828	145.692	-0.076143
265	34.29	pplu	1	0.63	-0.000292	87.252	-0.033811	0.597	0.000827	145.985	-0.075955
266	34.344	pplu	1	0.626	-0.000293	87.202	-0.034763	0.595	0.000826	146.264	-0.075772
267	34.398	pplu	1	0.627	-0.000294	86.954	-0.035836	0.6	0.000825	146.043	-0.075594
268	34.452	pplu	1	0.629	-0.000294	86.916	-0.037004	0.599	0.000824	146.193	-0.075424
269	34.506	pplu	1	0.629	-0.000295	87.156	-0.038241	0.601	0.000823	146.179	-0.075259
270	34.56	pplu	1	0.629	-0.000296	87.352	-0.03952	0.6	0.000822	145.986	-0.075103
271	34.614	pplu	1	0.63	-0.000296	86.936	-0.040812	0.598	0.000821	146.111	-0.074953
272	34.667	pplu	1	0.626	-0.000297	87.163	-0.042091	0.599	0.000819	146.154	-0.074812
273	34.721	pplu	1	0.629	-0.000298	86.938	-0.04333	0.601	0.000818	146.175	-0.074679
274	34.775	pplu	1	0.629	-0.000299	87.037	-0.0445	0.599	0.000817	145.927	-0.074553
275	34.829	pplu	1	0.627	-0.000299	87.251	-0.045578	0.598	0.000815	146.045	-0.074435
276	34.883	pplu	1	0.625	-0.0003	87.378	-0.046539	0.6	0.000814	146.138	-0.074324
277	34.937	pplu	1	0.628	-0.000301	87.087	-0.047363	0.601	0.000813	146.074	-0.074219
278	34.991	pplu	1	0.628	-0.000302	87.242	-0.048031	0.6	0.000811	146.29	-0.07412
279	35.045	pplu	1	0.626	-0.000303	87.307	-0.048529	0.6	0.00081	146.09	-0.074026
280	35.099	pplu	1	0.628	-0.000303	87.285	-0.048845	0.599	0.000808	146.002	-0.073936
281	35.153	pplu	1	0.629	-0.000304	87.219	-0.048972	0.598	0.000807	146.391	-0.07385
282	35.207	pplu	1	0.625	-0.000305	87.442	-0.048909	0.599	0.000805	146.65	-0.073765
283	35.261	pplu	1	0.626	-0.000306	87.156	-0.04866	0.598	0.000804	146.29	-0.073682
284	35.315	pplu	1	0.625	-0.000307	87.017	-0.048233	0.599	0.000802	146.064	-0.0736
285	35.368	pplu	1	0.629	-0.000308	87.288	-0.047643	0.602	0.0008	145.889	-0.073517
286	35.422	pplu	1	0.63	-0.000309	87.052	-0.046912	0.602	0.000799	145.844	-0.073432
287	35.476	pplu	1	0.627	-0.00031	87.011	-0.046066	0.6	0.000797	146.351	-0.073345
288	35.53	pplu	1	0.628	-0.000311	87.134	-0.045137	0.6	0.000795	146.223	-0.073254
289	35.584	pplu	1	0.629	-0.000312	87.089	-0.044161	0.6	0.000793	145.595	-0.07316
290	35.638	pplu	1	0.625	-0.000313	87.099	-0.043173	0.601	0.000791	145.543	-0.07306
291	35.692	pplu	1	0.628	-0.000314	87.093	-0.042209	0.601	0.000789	145.707	-0.072955
292	35.746	pplu	1	0.627	-0.000315	87.209	-0.041304	0.601	0.000787	145.725	-0.072844
293	35.8	pplu	1	0.627	-0.000317	87.292	-0.04049	0.602	0.000785	145.866	-0.072727
294	35.854	pplu	1	0.63	-0.000318	87.154	-0.039794	0.6	0.000783	145.889	-0.072604
295	35.908	pplu	1	0.628	-0.000319	87.082	-0.039235	0.6	0.000781	145.584	-0.072475
296	35.962	pplu	1	0.625	-0.00032	87.28	-0.038827	0.601	0.000779	145.606	-0.07234
297	36.016	pplu	1	0.625	-0.000321	87.447	-0.038575	0.601	0.000776	145.752	-0.0722
298	36.07	pplu	1	0.626	-0.000323	87.199	-0.038475	0.6	0.000774	145.707	-0.072055
299	36.123	pplu	1	0.627	-0.000324	87.099	-0.038521	0.6	0.000771	145.725	-0.071904
300	36.177	pplu	1	0.629	-0.000325	87.217	-0.038698	0.602	0.000768	145.715	-0.071749
301	36.231	pplu	1	0.628	-0.000326	87.007	-0.038987	0.603	0.000766	145.698	-0.071588
302	36.285	pplu	1	0.629	-0.000327	87.033	-0.039369	0.602	0.000763	145.756	-0.071424
303	36.339	pplu	1	0.627	-0.000329	87.254	-0.03982	0.6	0.00076	146.004	-0.071254
304	36.393	pplu	1	0.627	-0.00033	86.98	-0.040321	0.6	0.000757	145.915	-0.071081
305	36.447	pplu	1	0.629	-0.000331	86.811	-0.04085	0.6	0.000754	146.022	-0.070904
306	36.501	pplu	1	0.629	-0.000333	86.892	-0.04139	0.6	0.000751	145.857	-0.070724
307	36.555	pplu	1	0.628	-0.000334	86.889	-0.041922	0.601	0.000748	145.529	-0.07054
308	36.609	pplu	1	0.628	-0.000335	86.966	-0.042432	0.599	0.000745	145.759	-0.070353
309	36.663	pplu	1	0.626	-0.000336	87.053	-0.042904	0.601	0.000742	145.876	-0.070164
310	36.717	pplu	1	0.625	-0.000338	87.1	-0.043325	0.599	0.000739	145.728	-0.069973
311	36.771	pplu	1	0.629	-0.000339	87.019	-0.043682	0.599	0.000736	145.945	-0.069781
312	36.824	pplu	1	0.63	-0.00034	86.835	-0.043962	0.598	0.000733	145.896	-0.069588
313	36.878	pplu	1	0.629	-0.000341	86.915	-0.044155	0.598	0.00073	145.555	-0.069395
314	36.932	pplu	1	0.629	-0.000342	87.055	-0.044248	0.602	0.000727	145.639	-0.069204
315	36.986	pplu	1	0.629	-0.000344	86.834	-0.044236	0.597	0.000724	145.618	-0.069016
316	37.04	pplu	1	0.628	-0.000345	86.872	-0.04411	0.598	0.000721	145.744	-0.068831
317	37.094	pplu	1	0.627	-0.000346	87.209	-0.043868	0.603	0.000719	145.619	-0.068652
318	37.148	pplu	1	0.627	-0.000347	87.249	-0.043508	0.601	0.000716	145.656	-0.068478
319	37.202	pplu	1	0.626	-0.000348	86.943	-0.043031	0.599	0.000713	145.774	-0.068313
320	37.256	pplu	1	0.627	-0.00035	87.176	-0.042441	0.601	0.000711	145.911	-0.068156
321	37.31	pplu	1	0.623	-0.000351	87.065	-0.041744	0.602	0.000708	145.868	-0.068008
322	37.364	pplu	1	0.622	-0.000352	86.784	-0.040949	0.602	0.000706	145.696	-0.067871
323	37.418	pplu	1	0.624	-0.000353	86.993	-0.040065	0.599	0.000704	145.682	-0.067745
324	37.472	pplu	1	0.624	-0.000354	87.27	-0.039101	0.603	0.000702	145.631	-0.067631
325	37.525	pplu	1	0.627	-0.000355	87.258	-0.038072	0.601	0.0007	145.651	-0.06753
326	37.579	pplu	1	0.627	-0.000357	87.097	-0.036992	0.601	0.000698	145.896	-0.067442
327	37.633	pplu	1	0.627	-0.000358	87.119	-0.035878	0.6	0.000696	146.118	-0.067367
328	37.687	pplu	1	0.629	-0.000359	87.313	-0.034749	0.603	0.000695	145.961	-0.067306
329	37.741	pplu	1	0.627	-0.00036	87.143	-0.033621	0.603	0.000693	146.042	-0.067259
330	37.795	pplu	1	0.626	-0.000361	86.855	-0.032512	0.601	0.000692	145.956	-0.067226
331	37.849	pplu	1	0.627	-0.000362	87.245	-0.031437	0.602	0.000691	145.756	-0.067206
332	37.903	pplu	1	0.624	-0.000363	87.027	-0.030407	0.603	0.00069	145.802	-0.0672
333	37.957	pplu	1	0.626	-0.000364	87.054	-0.029431	0.601	0.000689	145.875	-0.067206
334	38.011	pplu	1	0.627	-0.000365	87.07	-0.028512	0.602	0.000688	145.805	-0.067226
335	38.065	pplu	1	0.626	-0.000366	87.15	-0.027653	0.603	0.000687	145.856	-0.067257
336	38.119	pplu	1	0.624	-0.000367	86.916	-0.02685	0.602	0.000687	145.935	-0.067299
337	38.173	pplu	1	0.625	-0.000368	87.103	-0.0261	0.601	0.000686	145.596	-0.067352
338	38.226	pplu	1	0.625	-0.000368	86.807	-0.0254	0.6	0.000686	145.682	-0.067416
339	38.28	pplu	1	0.627	-0.000369	86.892	-0.024746	0.6	0.000685	145.787	-0.067488
340	38.334	pplu	1	0.629	-0.00037	87.342	-0.024131	0.6	0.000685	145.879	-0.067569
341	38.388	pplu	1	0.628	-0.000371	87.155	-0.023552	0.602	0.000685	146.055	-0.067657
342	38.442	pplu	1	0.627	-0.000372	86.999	-0.023005	0.603	0.000685	145.859	-0.067752
343	38.496	pplu	1	0.627	-0.000372	86.945	-0.02249	0.604	0.000685	145.63	-0.067853
344	38.55	pplu	1	0.627	-0.000373	86.671	-0.02201	0.604	0.000685	145.524	-0.067959
345	38.604	pplu	1	0.628	-0.000374	86.642	-0.021572	0.602	0.000685	145.616	-0.068068
346	38.658	pplu	1	0.627	-0.000374	86.855	-0.021185	0.601	0.000685	145.806	-0.068178
347	38.712	pplu	1	0.628	-0.000375	86.67	-0.020863	0.602	0.000685	145.909	-0.06829
348	38.766	pplu	1	0.629	-0.000375	86.897	-0.020621	0.6	0.000685	145.885	-0.0684
349	38.82	pplu	1	0.626	-0.000376	86.873	-0.020472	0.601	0.000686	145.715	-0.068508
350	38.874	pplu	1	0.625	-0.000376	86.58	-0.020429	0.603	0.000686	145.747	-0.068612
351	38.928	pplu	1	0.627	-0.000377	86.862	-0.020499	0.601	0.000686	145.831	-0.06871
352	38.981	pplu	1	0.624	-0.000377	86.881	-0.020686	0.601	0.000687	145.858	-0.0688
353	39.035	pplu	1	0.624	-0.000377	86.974	-0.020988	0.603	0.000687	145.915	-0.068881
354	39.089	pplu	1	0.625	-0.000378	87.276	-0.021398	0.602	0.000688	145.843	-0.068951
355	39.143	pplu	1	0.628	-0.000378	87.024	-0.021903	0.604	0.000688	145.657	-0.06901
356	39.197	pplu	1	0.626	-0.000378	86.971	-0.022487	0.602	0.000689	145.837	-0.069057
357	39.251	pplu	1	0.628	-0.000378	87.209	-0.023129	0.599	0.000689	146.045	-0.069089
358	39.305	pplu	1	0.626	-0.000378	87.096	-0.023808	0.599	0.00069	145.643	-0.069107
359	39.359	pplu	1	0.625	-0.000379	87.008	-0.024504	0.604	0.000691	145.685	-0.069111
360	39.413	pplu	1	0.624	-0.000379	87.166	-0.025195	0.604	0.000691	145.403	-0.069099
361	39.467	pplu	1	0.623	-0.000379	87.167	-0.025863	0.6	0.000692	145.357	-0.069071
362	39.521	pplu	1	0.626	-0.000379	87.132	-0.026493	0.601	0.000693	146.042	-0.069028
363	39.575	pplu	1	0.627	-0.000379	87.331	-0.027069	0.601	0.000694	145.663	-0.068969
364	39.629	pplu	1	0.63	-0.000379	87.238	-0.02758	0.603	0.000695	145.886	-0.068894
365	39.682	pplu	1	0.628	-0.000379	86.822	-0.02802	0.604	0.000696	145.975	-0.068804
366	39.736	pplu	1	0.625	-0.000379	86.917	-0.028384	0.602	0.000697	145.901	-0.068698
367	39.79	pplu	1	0.625	-0.000379	87.025	-0.028672	0.6	0.000699	145.662	-0.068577
368	39.844	pplu	1	0.625	-0.000379	87.036	-0.028889	0.602	0.0007	145.565	-0.068441
369	39.898	pplu	1	0.625	-0.000379	87.185	-0.02904	0.604	0.000701	145.55	-0.068291
370	39.952	pplu	1	0.624	-0.000379	87.007	-0.029132	0.603	0.000703	145.557	-0.068127
371	40.006	pplu	1	0.624	-0.000378	86.874	-0.029173	0.602	0.000704	145.699	-0.067951
372	40.06	pplu	1	0.625	-0.000378	86.991	-0.029173	0.603	0.000705	145.623	-0.067765
373	40.114	pplu	1	0.625	-0.000378	87.016	-0.029138	0.603	0.000707	145.313	-0.067569
374	40.168	pplu	1	0.624	-0.000378	87.005	-0.029077	0.602	0.000709	145.309	-0.067364
375	40.222	pplu	1	0.624	-0.000378	86.95	-0.028999	0.605	0.00071	145.496	-0.067154
376	40.276	pplu	1	0.625	-0.000378	86.802	-0.028917	0.605	0.000712	145.385	-0.066939
377	40.33	pplu	1	0.626	-0.000378	86.881	-0.028841	0.604	0.000713	145.343	-0.066722
378	40.383	pplu	1	0.626	-0.000377	87.099	-0.028784	0.604	0.000715	145.41	-0.066505
379	40.437	pplu	1	0.627	-0.000377	87.048	-0.028757	0.603	0.000717	145.118	-0.066291
380	40.491	pplu	1	0.626	-0.000377	86.852	-0.02877	0.602	0.000718	145.344	-0.066082
381	40.545	pplu	1	0.625	-0.000377	86.802	-0.02883	0.604	0.00072	145.516	-0.065879
382	40.599	pplu	1	0.624	-0.000377	86.789	-0.02894	0.604	0.000722	145.344	-0.065685
383	40.653	pplu	1	0.625	-0.000376	86.778	-0.029103	0.606	0.000723	145.18	-0.065503
384	40.707	pplu	1	0.625	-0.000376	86.937	-0.029319	0.602	0.000725	145.476	-0.065332
385	40.761	pplu	1	0.625	-0.000376	87.128	-0.029585	0.602	0.000726	145.431	-0.065176
386	40.815	pplu	1	0.625	-0.000376	87.14	-0.029901	0.602	0.000728	145.569	-0.065034
387	40.869	pplu	1	0.623	-0.000376	87.023	-0.030262	0.602	0.000729	145.638	-0.064909
388	40.923	pplu	1	0.625	-0.000376	86.795	-0.030665	0.603	0.000731	145.543	-0.0648
389	40.977	pplu	1	0.626	-0.000375	86.755	-0.031104	0.602	0.000732	145.598	-0.064709
390	41.031	pplu	1	0.626	-0.000375	86.975	-0.031573	0.604	0.000733	145.774	-0.064636
391	41.084	pplu	1	0.627	-0.000375	87.005	-0.032061	0.603	0.000734	145.71	-0.064582
392	41.138	pplu	1	0.627	-0.000375	86.869	-0.032562	0.602	0.000735	145.569	-0.064547
393	41.192	pplu	1	0.626	-0.000375	86.882	-0.033064	0.604	0.000736	145.52	-0.064529
394	41.246	pplu	1	0.623	-0.000374	87.195	-0.03356	0.604	0.000737	145.444	-0.06453
395	41.3	pplu	1	0.625	-0.000374	87.109	-0.034037	0.603	0.000738	145.426	-0.064549
396	41.354	pplu	1	0.627	-0.000374	86.923	-0.034486	0.602	0.000739	145.712	-0.064585
397	41.408	pplu	1	0.625	-0.000374	87.093	-0.034895	0.601	0.000739	145.711	-0.064637
398	41.462	pplu	1	0.626	-0.000373	87.266	-0.035255	0.603	0.00074	145.632	-0.064705
399	41.516	pplu	1	0.625	-0.000373	87.111	-0.035554	0.604	0.00074	145.802	-0.064789
400	41.57	pplu	1	0.624	-0.000373	86.878	-0.035786	0.604	0.000741	145.727	-0.064888
401	41.624	pplu	1	0.625	-0.000372	86.745	-0.035941	0.604	0.000741	145.62	-0.065001
402	41.678	pplu	1	0.625	-0.000372	87.177	-0.036015	0.604	0.000741	145.557	-0.065129
403	41.732	pplu	1	0.627	-0.000372	86.843	-0.03601	0.604	0.000742	145.384	-0.06527
404	41.786	pplu	1	0.625	-0.000371	86.737	-0.035934	0.603	0.000742	145.294	-0.065425
405	41.839	pplu	1	0.627	-0.000371	86.784	-0.035801	0.603	0.000742	145.26	-0.065592
406	41.893	pplu	1	0.625	-0.000371	86.914	-0.035629	0.607	0.000742	145.263	-0.065772
407	41.947	pplu	1	0.628	-0.00037	86.706	-0.035441	0.606	0.000742	145.469	-0.065963
408	42.001	pplu	1	0.628	-0.00037	86.819	-0.035263	0.602	0.000742	145.679	-0.066166
409	42.055	pplu	1	0.628	-0.000369	86.837	-0.035123	0.602	0.000742	145.686	-0.06638
410	42.109	pplu	1	0.625	-0.000369	86.874	-0.035048	0.604	0.000742	145.463	-0.066606
411	42.163	pplu	1	0.625	-0.000368	86.778	-0.035065	0.605	0.000742	145.493	-0.066842
412	42.217	pplu	1	0.622	-0.000368	86.886	-0.035197	0.605	0.000742	145.368	-0.067089
413	42.271	pplu	1	0.622	-0.000367	87.059	-0.03546	0.604	0.000742	145.25	-0.067346
414	42.325	pplu	1	0.624	-0.000367	86.919	-0.035867	0.605	0.000742	145.425	-0.067613
415	42.379	pplu	1	0.626	-0.000366	87.078	-0.036421	0.606	0.000742	145.463	-0.067888
416	42.433	pplu	1	0.624	-0.000366	86.697	-0.037117	0.605	0.000742	145.403	-0.068172
417	42.487	pplu	1	0.625	-0.000365	86.773	-0.037943	0.606	0.000742	145.851	-0.068464
418	42.54	pplu	1	0.626	-0.000364	86.841	-0.038878	0.605	0.000742	145.674	-0.068762
419	42.594	pplu	1	0.626	-0.000364	86.955	-0.039893	0.604	0.000742	145.621	-0.069065
420	42.648	pplu	1	0.627	-0.000363	87.012	-0.040954	0.605	0.000742	145.534	-0.069372
421	42.702	pplu	1	0.625	-0.000362	86.56	-0.042025	0.605	0.000742	145.462	-0.069682
422	42.756	pplu	1	0.628	-0.000361	86.658	-0.043068	0.604	0.000742	145.448	-0.069993
423	42.81	pplu	1	0.625	-0.000361	87.088	-0.044046	0.604	0.000742	145.533	-0.070303
424	42.864	pplu	1	0.625	-0.00036	86.776	-0.044927	0.603	0.000742	145.328	-0.070611
425	42.918	pplu	1	0.624	-0.000359	86.779	-0.04568	0.606	0.000742	145.325	-0.070914
426	42.972	pplu	1	0.625	-0.000358	86.962	-0.046282	0.609	0.000742	145.399	-0.071211
427	43.026	pplu	1	0.626	-0.000357	86.893	-0.046712	0.608	0.000742	145.66	-0.071498
428	43.08	pplu	1	0.625	-0.000357	86.854	-0.046957	0.605	0.000741	145.534	-0.071775
429	43.134	pplu	1	0.625	-0.000356	86.8	-0.047011	0.605	0.000741	145.499	-0.07204
430	43.188	pplu	1	0.622	-0.000355	86.861	-0.046874	0.605	0.000741	145.49	-0.072289
431	43.241	pplu	1	0.624	-0.000354	86.987	-0.046551	0.605	0.00074	145.401	-0.072522
432	43.295	pplu	1	0.623	-0.000352	86.765	-0.046053	0.604	0.00074	145.588	-0.072737
433	43.349	pplu	1	0.624	-0.000351	86.744	-0.045395	0.605	0.000739	145.589	-0.072932
434	43.403	pplu	1	0.627	-0.00035	86.886	-0.044595	0.605	0.000739	145.416	-0.073106
435	43.457	pplu	1	0.623	-0.000349	87.004	-0.043673	0.606	0.000738	145.35	-0.073257
436	43.511	pplu	1	0.623	-0.000348	87.006	-0.04265	0.603	0.000738	145.296	-0.073383
437	43.565	pplu	1	0.626	-0.000346	86.98	-0.041549	0.605	0.000737	145.358	-0.073484
438	43.619	pplu	1	0.625	-0.000345	86.629	-0.040392	0.606	0.000736	145.417	-0.073557
439	43.673	pplu	1	0.627	-0.000344	86.87	-0.039199	0.604	0.000735	145.374	-0.073602
440	43.727	pplu	1	0.624	-0.000342	86.987	-0.037987	0.605	0.000734	145.544	-0.073616
441	43.781	pplu	1	0.622	-0.000341	86.889	-0.036774	0.605	0.000733	145.603	-0.073598
442	43.835	pplu	1	0.624	-0.000339	86.901	-0.035577	0.606	0.000732	145.321	-0.073547
443	43.889	pplu	1	0.622	-0.000337	86.891	-0.034416	0.607	0.000731	145.285	-0.07346
444	43.942	pplu	1	0.623	-0.000336	87.046	-0.033309	0.607	0.00073	145.444	-0.073337
445	43.996	pplu	1	0.624	-0.000334	87.044	-0.032275	0.608	0.000729	145.541	-0.073176
446	44.05	pplu	1	0.625	-0.000332	86.867	-0.031334	0.607	0.000727	145.584	-0.072975
447	44.104	pplu	1	0.626	-0.00033	86.819	-0.030504	0.605	0.000726	145.632	-0.072733
448	44.158	pplu	1	0.626	-0.000328	86.856	-0.029803	0.604	0.000725	145.525	-0.072449
449	44.212	pplu	1	0.624	-0.000326	86.804	-0.02925	0.604	0.000724	145.475	-0.072122
450	44.266	pplu	1	0.62	-0.000324	86.921	-0.028861	0.606	0.000722	145.081	-0.071751
451	44.32	pplu	1	0.622	-0.000322	86.887	-0.028651	0.607	0.000721	145.136	-0.071334
452	44.374	pplu	1	0.624	-0.00032	86.755	-0.028627	0.605	0.00072	145.266	-0.070873
453	44.428	pplu	1	0.626	-0.000318	86.889	-0.028796	0.605	0.000719	145.332	-0.070366
454	44.482	pplu	1	0.625	-0.000316	86.86	-0.02916	0.607	0.000717	145.6	-0.069813
455	44.536	pplu	1	0.622	-0.000313	86.86	-0.029718	0.606	0.000716	145.537	-0.069215
456	44.59	pplu	1	0.621	-0.000311	86.853	-0.030464	0.603	0.000715	145.201	-0.068573
457	44.643	pplu	1	0.622	-0.000309	86.783	-0.031388	0.606	0.000714	144.989	-0.067888
458	44.697	pplu	1	0.623	-0.000306	86.687	-0.032478	0.604	0.000713	145.289	-0.067161
459	44.751	pplu	1	0.621	-0.000304	86.745	-0.033716	0.608	0.000712	145.364	-0.066394
460	44.805	pplu	1	0.62	-0.000301	86.646	-0.035086	0.608	0.000711	145.258	-0.065588
461	44.859	pplu	1	0.622	-0.000299	86.765	-0.036569	0.609	0.000711	144.921	-0.064746
462	44.913	pplu	1	0.624	-0.000296	86.929	-0.038147	0.607	0.00071	145.104	-0.06387
463	44.967	pplu	1	0.623	-0.000294	86.786	-0.039798	0.604	0.000709	145.054	-0.062961
464	45.021	pplu	1	0.62	-0.000291	86.652	-0.0415	0.604	0.000709	145.114	-0.062024
465	45.075	pplu	1	0.622	-0.000289	86.771	-0.043224	0.606	0.000708	145.461	-0.06106
466	45.129	pplu	1	0.626	-0.000286	86.653	-0.044945	0.607	0.000708	145.277	-0.060074
467	45.183	pplu	1	0.627	-0.000283	86.365	-0.046633	0.608	0.000708	145.212	-0.059067
468	45.237	pplu	1	0.624	-0.000281	86.308	-0.048258	0.609	0.000708	145.269	-0.058044
469	45.291	pplu	1	0.623	-0.000278	86.567	-0.049786	0.605	0.000708	145.008	-0.057007
470	45.345	pplu	1	0.621	-0.000275	86.599	-0.051184	0.607	0.000708	144.92	-0.05596
471	45.398	pplu	1	0.622	-0.000273	86.797	-0.052416	0.609	0.000708	144.83	-0.054907
472	45.452	pplu	1	0.623	-0.00027	86.886	-0.053449	0.607	0.000708	144.882	-0.053852
473	45.506	pplu	1	0.623	-0.000267	86.676	-0.054251	0.606	0.000708	145.002	-0.052797
474	45.56	pplu	1	0.623	-0.000265	86.69	-0.054795	0.605	0.000708	145.084	-0.051746
475	45.614	pplu	1	0.625	-0.000262	86.799	-0.055059	0.606	0.000709	145.201	-0.050704
476	45.668	pplu	1	0.627	-0.000259	86.921	-0.05503	0.607	0.000709	145.231	-0.049673
477	45.722	pplu	1	0.623	-0.000256	86.908	-0.054699	0.608	0.000709	145.23	-0.048656
478	45.776	pplu	1	0.626	-0.000254	86.764	-0.054069	0.608	0.00071	145.092	-0.047657
479	45.83	pplu	1	0.627	-0.000251	86.827	-0.053149	0.608	0.00071	145.022	-0.046677
480	45.884	pplu	1	0.628	-0.000248	87.061	-0.051958	0.608	0.000711	145.139	-0.045719
481	45.938	pplu	1	0.625	-0.000245	86.861	-0.050523	0.606	0.000712	145.252	-0.044785
482	45.992	pplu	1	0.624	-0.000243	86.932	-0.048877	0.606	0.000712	145.273	-0.043876
483	46.046	pplu	1	0.625	-0.00024	86.943	-0.047058	0.607	0.000713	145.178	-0.042994
484	46.099	pplu	1	0.621	-0.000237	86.919	-0.045106	0.609	0.000713	145.279	-0.042139
485	46.153	pplu	1	0.622	-0.000234	86.918	-0.043066	0.609	0.000714	145.394	-0.041313
486	46.207	pplu	1	0.622	-0.000232	86.95	-0.040983	0.608	0.000715	145.329	-0.040516
487	46.261	pplu	1	0.625	-0.000229	86.902	-0.038904	0.608	0.000715	145.394	-0.039749
488	46.315	pplu	1	0.621	-0.000226	86.566	-0.036873	0.608	0.000716	145.533	-0.039011
489	46.369	pplu	1	0.624	-0.000223	86.738	-0.034936	0.606	0.000716	145.267	-0.038305
490	46.423	pplu	1	0.623	-0.000221	86.514	-0.033131	0.605	0.000717	145.13	-0.03763
491	46.477	pplu	1	0.623	-0.000218	86.896	-0.031498	0.605	0.000718	145.06	-0.036986
492	46.531	pplu	1	0.623	-0.000215	86.668	-0.030069	0.607	0.000719	144.884	-0.036376
493	46.585	pplu	1	0.627	-0.000212	86.583	-0.028872	0.604	0.000719	145.109	-0.035799
494	46.639	pplu	1	0.625	-0.000209	86.696	-0.027926	0.608	0.00072	145.184	-0.035257
495	46.693	pplu	1	0.624	-0.000207	86.781	-0.027244	0.607	0.000721	145.319	-0.03475
496	46.747	pplu	1	0.625	-0.000204	86.358	-0.026834	0.609	0.000722	145.002	-0.03428
497	46.8	pplu	1	0.622	-0.000201	86.713	-0.026691	0.607	0.000723	144.889	-0.033849
498	46.854	pplu	1	0.624	-0.000198	86.924	-0.026805	0.607	0.000723	145.152	-0.033456
499	46.908	pplu	1	0.626	-0.000196	86.895	-0.027156	0.606	0.000724	144.948	-0.033104
500	46.962	pplu	1	0.621	-0.000193	86.761	-0.027719	0.608	0.000725	144.919	-0.032794
501	47.016	pplu	1	0.623	-0.00019	86.673	-0.028463	0.609	0.000726	145.213	-0.032526
502	47.07	pplu	1	0.622	-0.000187	86.672	-0.029352	0.607	0.000728	145.232	-0.032301
503	47.124	pplu	1	0.624	-0.000184	87.047	-0.030346	0.608	0.000729	145.162	-0.03212
504	47.178	pplu	1	0.623	-0.000181	86.639	-0.031408	0.605	0.00073	145.277	-0.031983
505	47.232	pplu	1	0.623	-0.000179	86.326	-0.0325	0.609	0.000731	145.22	-0.03189
506	47.286	pplu	1	0.623	-0.000176	86.577	-0.033587	0.61	0.000733	145.103	-0.031841
507	47.34	pplu	1	0.622	-0.000173	86.555	-0.034636	0.608	0.000734	145.4	-0.031836
508	47.394	pplu	1	0.624	-0.00017	86.691	-0.035615	0.608	0.000735	145.353	-0.031873
509	47.448	pplu	1	0.623	-0.000167	87.057	-0.036499	0.607	0.000737	145.313	-0.031953
510	47.501	pplu	1	0.622	-0.000164	86.67	-0.037263	0.606	0.000739	145.299	-0.032074
511	47.555	pplu	1	0.625	-0.000162	86.458	-0.03789	0.608	0.00074	145.224	-0.032234
512	47.609	pplu	1	0.627	-0.000159	86.49	-0.038364	0.61	0.000742	145.256	-0.032431
513	47.663	pplu	1	0.624	-0.000156	86.396	-0.038673	0.609	0.000744	145.275	-0.032665
514	47.717	pplu	1	0.624	-0.000153	86.701	-0.03881	0.609	0.000745	145.267	-0.032932
515	47.771	pplu	1	0.623	-0.00015	86.829	-0.038766	0.609	0.000747	145.32	-0.033231
516	47.825	pplu	1	0.624	-0.000147	86.669	-0.038534	0.608	0.000749	145.425	-0.033558
517	47.879	pplu	1	0.622	-0.000145	86.697	-0.038108	0.608	0.000751	145.474	-0.033913
518	47.933	pplu	1	0.622	-0.000142	86.33	-0.037479	0.608	0.000752	145.347	-0.034292
519	47.987	pplu	1	0.624	-0.000139	86.373	-0.036641	0.609	0.000754	145.097	-0.034693
520	48.041	pplu	1	0.625	-0.000136	86.55	-0.03559	0.61	0.000756	145.133	-0.035113
521	48.095	pplu	1	0.62	-0.000133	86.474	-0.034324	0.608	0.000758	145.398	-0.03555
522	48.149	pplu	1	0.62	-0.00013	86.671	-0.032852	0.61	0.000759	145.4	-0.036002
523	48.203	pplu	1	0.624	-0.000128	86.72	-0.031184	0.609	0.000761	145.6	-0.036468
524	48.256	pplu	1	0.623	-0.000125	86.514	-0.029338	0.609	0.000763	145.399	-0.036944
525	48.31	pplu	1	0.622	-0.000122	86.604	-0.027339	0.609	0.000764	145.376	-0.037429
526	48.364	pplu	1	0.625	-0.000119	86.786	-0.025214	0.609	0.000766	145.418	-0.037923
527	48.418	pplu	1	0.625	-0.000116	86.914	-0.022998	0.608	0.000767	145.105	-0.038422
528	48.472	pplu	1	0.624	-0.000113	86.969	-0.020727	0.607	0.000768	144.936	-0.038926
529	48.526	pplu	1	0.624	-0.00011	86.789	-0.018443	0.609	0.00077	145.333	-0.039433
530	48.58	pplu	1	0.623	-0.000107	86.788	-0.01619	0.609	0.000771	144.965	-0.039943
531	48.634	pplu	1	0.622	-0.000105	86.944	-0.014013	0.611	0.000772	145.107	-0.040453
532	48.688	pplu	1	0.623	-0.000102	86.873	-0.011957	0.61	0.000773	145.151	-0.040962
533	48.742	pplu	1	0.622	-9.9e-05	86.878	-0.010066	0.611	0.000774	145.034	-0.04147
534	48.796	pplu	1	0.62	-9.6e-05	86.895	-0.00838	0.607	0.000775	145.114	-0.041975
535	48.85	pplu	1	0.62	-9.3e-05	86.655	-0.006932	0.611	0.000776	144.902	-0.042475
536	48.904	pplu	1	0.619	-9e-05	86.615	-0.005747	0.609	0.000777	145.198	-0.04297
537	48.957	pplu	1	0.621	-8.7e-05	86.756	-0.004842	0.61	0.000777	145.195	-0.043459
538	49.011	pplu	1	0.622	-8.4e-05	86.849	-0.004223	0.607	0.000778	145.221	-0.04394
539	49.065	pplu	1	0.622	-8e-05	86.723	-0.003887	0.609	0.000778	144.862	-0.044413
540	49.119	pplu	1	0.622	-7.7e-05	86.682	-0.003825	0.608	0.000779	145.032	-0.044876
541	49.173	pplu	1	0.623	-7.4e-05	86.483	-0.00402	0.608	0.000779	144.966	-0.045328
542	49.227	pplu	1	0.623	-7.1e-05	86.591	-0.004451	0.607	0.000779	145.006	-0.045769
543	49.281	pplu	1	0.623	-6.8e-05	86.614	-0.005091	0.611	0.000779	145.097	-0.046197
544	49.335	pplu	1	0.623	-6.5e-05	86.573	-0.005911	0.609	0.00078	145.32	-0.046612
545	49.389	pplu	1	0.621	-6.1e-05	86.322	-0.006882	0.609	0.00078	145.236	-0.047013
546	49.443	pplu	1	0.624	-5.8e-05	86.564	-0.007971	0.609	0.00078	145.034	-0.047399
547	49.497	pplu	1	0.621	-5.5e-05	86.63	-0.009148	0.607	0.00078	144.979	-0.04777
548	49.551	pplu	1	0.625	-5.2e-05	86.436	-0.010384	0.608	0.00078	144.829	-0.048127
549	49.605	pplu	1	0.625	-4.8e-05	86.431	-0.011654	0.611	0.000779	144.943	-0.048469
550	49.658	pplu	1	0.622	-4.5e-05	86.341	-0.012935	0.611	0.000779	144.966	-0.048796
551	49.712	pplu	1	0.62	-4.2e-05	86.153	-0.014211	0.609	0.000779	145.068	-0.049109
552	49.766	pplu	1	0.623	-3.8e-05	86.49	-0.015465	0.611	0.000779	145.056	-0.049409
553	49.82	pplu	1	0.625	-3.5e-05	86.36	-0.016685	0.612	0.000779	144.78	-0.049697
554	49.874	pplu	1	0.622	-3.2e-05	86.48	-0.017863	0.611	0.000779	144.699	-0.049973
555	49.928	pplu	1	0.618	-2.9e-05	86.51	-0.01899	0.611	0.000778	144.859	-0.050238
556	49.982	pplu	1	0.624	-2.5e-05	86.508	-0.02006	0.613	0.000778	145.054	-0.050494
557	50.036	pplu	1	0.619	-2.2e-05	86.975	-0.021064	0.613	0.000778	145.086	-0.050742
558	50.09	pplu	1	0.624	-1.9e-05	86.686	-0.021995	0.61	0.000778	144.934	-0.050984
559	50.144	pplu	1	0.622	-1.5e-05	86.65	-0.022846	0.61	0.000777	144.917	-0.05122
560	50.198	pplu	1	0.623	-1.2e-05	87	-0.023613	0.609	0.000777	145.016	-0.051451
561	50.252	pplu	1	0.623	-9e-06	86.838	-0.02429	0.61	0.000777	144.972	-0.05168
562	50.306	pplu	1	0.625	-5e-06	86.833	-0.024873	0.611	0.000777	145.055	-0.051906
563	50.359	pplu	1	0.622	-2e-06	86.759	-0.025357	0.61	0.000777	145.049	-0.052131
564	50.413	pplu	1	0.621	1e-06	87.03	-0.025735	0.611	0.000776	145.091	-0.052356
565	50.467	pplu	1	0.624	5e-06	86.806	-0.026006	0.611	0.000776	145.204	-0.052582
566	50.521	pplu	1	0.621	8e-06	86.576	-0.026166	0.609	0.000776	144.95	-0.052809
567	50.575	pplu	1	0.623	1.1e-05	86.693	-0.026217	0.61	0.000776	144.987	-0.053037
568	50.629	pplu	1	0.623	1.4e-05	86.789	-0.026165	0.612	0.000776	145.201	-0.053268
569	50.683	pplu	1	0.623	1.8e-05	86.676	-0.026013	0.613	0.000776	145.197	-0.0535
570	50.737	pplu	1	0.621	2.1e-05	86.771	-0.025772	0.611	0.000775	145.149	-0.053733
571	50.791	pplu	1	0.623	2.4e-05	86.758	-0.025453	0.61	0.000775	145.21	-0.053968
572	50.845	pplu	1	0.623	2.7e-05	86.672	-0.025072	0.611	0.000775	144.977	-0.054203
573	50.899	pplu	1	0.623	3.1e-05	86.708	-0.024648	0.613	0.000775	144.938	-0.054437
574	50.953	pplu	1	0.624	3.4e-05	86.935	-0.024203	0.613	0.000775	144.988	-0.054671
575	51.007	pplu	1	0.62	3.7e-05	86.728	-0.023758	0.614	0.000774	145.065	-0.054903
576	51.061	pplu	1	0.624	4e-05	86.578	-0.023341	0.612	0.000774	145.386	-0.055132
577	51.114	pplu	1	0.622	4.4e-05	86.649	-0.02298	0.61	0.000774	145.451	-0.055357
578	51.168	pplu	1	0.624	4.7e-05	86.636	-0.022711	0.609	0.000774	145.064	-0.055577
579	51.222	pplu	1	0.621	5e-05	86.612	-0.022566	0.612	0.000773	145.084	-0.055791
580	51.276	pplu	1	0.621	5.3e-05	86.658	-0.022579	0.613	0.000773	145.169	-0.055997
581	51.33	pplu	1	0.624	5.7e-05	86.446	-0.022778	0.611	0.000773	145.002	-0.056195
582	51.384	pplu	1	0.622	6e-05	86.663	-0.023189	0.609	0.000772	144.928	-0.056383
583	51.438	pplu	1	0.619	6.3e-05	86.846	-0.023831	0.611	0.000772	145.001	-0.05656
584	51.492	pplu	1	0.621	6.6e-05	86.574	-0.024715	0.613	0.000772	144.727	-0.056727
585	51.546	pplu	1	0.622	6.9e-05	86.488	-0.025846	0.61	0.000771	145.131	-0.056883
586	51.6	pplu	1	0.624	7.3e-05	86.507	-0.027217	0.611	0.000771	145.06	-0.057028
587	51.654	pplu	1	0.621	7.6e-05	86.493	-0.028813	0.611	0.000771	144.989	-0.05716
588	51.708	pplu	1	0.622	7.9e-05	86.525	-0.030612	0.614	0.000771	144.893	-0.057282
589	51.762	pplu	1	0.623	8.2e-05	86.582	-0.032584	0.614	0.00077	144.836	-0.057393
590	51.815	pplu	1	0.624	8.5e-05	86.516	-0.034694	0.609	0.00077	144.747	-0.057494
591	51.869	pplu	1	0.626	8.8e-05	86.418	-0.036902	0.61	0.00077	144.79	-0.057585
592	51.923	pplu	1	0.625	9.2e-05	86.589	-0.03916	0.609	0.00077	144.968	-0.057667
593	51.977	pplu	1	0.624	9.5e-05	86.478	-0.04142	0.611	0.000769	145.06	-0.057741
594	52.031	pplu	1	0.623	9.8e-05	86.433	-0.04363	0.613	0.000769	144.964	-0.057808
595	52.085	pplu	1	0.622	0.000101	86.606	-0.045743	0.611	0.000769	145.07	-0.057867
596	52.139	pplu	1	0.622	0.000104	86.506	-0.047713	0.61	0.000769	145.165	-0.057921
597	52.193	pplu	1	0.622	0.000107	86.454	-0.049498	0.612	0.000769	144.978	-0.057969
598	52.247	pplu	1	0.622	0.00011	86.581	-0.051062	0.611	0.000769	145.306	-0.058011
599	52.301	pplu	1	0.623	0.000113	86.643	-0.052372	0.611	0.000769	145.343	-0.058047
600	52.355	pplu	1	0.622	0.000116	86.628	-0.053404	0.612	0.000769	144.997	-0.058077
601	52.409	pplu	1	0.622	0.000119	86.631	-0.054137	0.613	0.00077	145.002	-0.0581
602	52.463	pplu	1	0.623	0.000122	86.692	-0.054557	0.613	0.00077	145.138	-0.058116
603	52.516	pplu	1	0.623	0.000125	86.696	-0.054654	0.613	0.00077	145.005	-0.058124
604	52.57	pplu	1	0.622	0.000128	86.582	-0.054423	0.613	0.000771	145.206	-0.058122
605	52.624	pplu	1	0.622	0.000131	86.445	-0.05387	0.613	0.000771	145.315	-0.058111
606	52.678	pplu	1	0.624	0.000134	86.626	-0.053007	0.609	0.000772	145.223	-0.05809
607	52.732	pplu	1	0.626	0.000137	86.675	-0.051855	0.61	0.000772	145.182	-0.058057
608	52.786	pplu	1	0.625	0.00014	86.466	-0.050441	0.612	0.000773	144.952	-0.058013
609	52.84	pplu	1	0.625	0.000143	86.546	-0.048797	0.611	0.000774	144.725	-0.057957
610	52.894	pplu	1	0.624	0.000146	86.612	-0.046959	0.613	0.000775	144.582	-0.05789
611	52.948	pplu	1	0.625	0.000149	86.668	-0.044965	0.614	0.000776	144.657	-0.05781
612	53.002	pplu	1	0.623	0.000152	86.648	-0.04286	0.613	0.000777	145.106	-0.05772
613	53.056	pplu	1	0.624	0.000155	86.356	-0.040685	0.613	0.000778	145.188	-0.057618
614	53.11	pplu	1	0.627	0.000158	86.545	-0.038487	0.614	0.000779	144.824	-0.057507
615	53.164	pplu	1	0.626	0.000161	86.793	-0.036308	0.614	0.00078	144.608	-0.057387
616	53.217	pplu	1	0.626	0.000164	86.624	-0.03419	0.612	0.000782	144.696	-0.05726
617	53.271	pplu	1	0.623	0.000167	86.53	-0.032174	0.614	0.000783	144.841	-0.057126
618	53.325	pplu	1	0.624	0.00017	86.395	-0.030294	0.614	0.000784	144.768	-0.056988
619	53.379	pplu	1	0.625	0.000173	86.565	-0.028583	0.612	0.000786	144.697	-0.056847
620	53.433	pplu	1	0.624	0.000176	86.512	-0.027066	0.612	0.000787	144.636	-0.056703
621	53.487	pplu	1	0.623	0.000179	86.792	-0.025763	0.611	0.000789	144.42	-0.05656
622	53.541	pplu	1	0.625	0.000181	86.624	-0.02469	0.611	0.000791	144.354	-0.056417
623	53.595	pplu	1	0.625	0.000184	86.476	-0.023861	0.611	0.000792	144.612	-0.056277
624	53.649	pplu	1	0.628	0.000187	86.516	-0.023287	0.613	0.000794	144.807	-0.05614
625	53.703	pplu	1	0.623	0.00019	86.54	-0.022978	0.613	0.000796	144.806	-0.056008
626	53.757	pplu	1	0.624	0.000193	86.288	-0.02294	0.614	0.000798	144.899	-0.055881
627	53.811	pplu	1	0.622	0.000196	86.712	-0.023174	0.614	0.000799	144.856	-0.055761
628	53.865	pplu	1	0.624	0.000199	86.675	-0.023679	0.613	0.000801	144.692	-0.055647
629	53.919	pplu	1	0.623	0.000202	86.505	-0.024446	0.613	0.000803	144.702	-0.055541
630	53.972	pplu	1	0.623	0.000205	86.144	-0.025465	0.612	0.000805	144.656	-0.055442
631	54.026	pplu	1	0.625	0.000207	86.324	-0.026718	0.612	0.000807	144.813	-0.055349
632	54.08	pplu	1	0.623	0.00021	86.514	-0.028183	0.615	0.000809	144.886	-0.055264
633	54.134	pplu	1	0.622	0.000213	86.359	-0.029835	0.615	0.000811	144.985	-0.055186
634	54.188	pplu	1	0.623	0.000216	86.021	-0.031642	0.613	0.000813	145.031	-0.055113
635	54.242	pplu	1	0.62	0.000219	86.312	-0.033567	0.614	0.000814	144.97	-0.055046
636	54.296	pplu	1	0.623	0.000222	86.542	-0.035569	0.613	0.000816	144.873	-0.054983
637	54.35	pplu	1	0.624	0.000224	86.435	-0.037602	0.614	0.000818	145.117	-0.054925
638	54.404	pplu	1	0.624	0.000227	86.535	-0.039619	0.615	0.00082	145.16	-0.05487
639	54.458	pplu	1	0.625	0.00023	86.48	-0.041571	0.612	0.000822	144.761	-0.054818
640	54.512	pplu	1	0.624	0.000233	85.923	-0.043413	0.609	0.000824	144.842	-0.054768
641	54.566	pplu	1	0.622	0.000235	86.371	-0.0451	0.614	0.000826	144.63	-0.054721
642	54.62	pplu	1	0.621	0.000238	86.582	-0.046593	0.612	0.000828	144.748	-0.054675
643	54.673	pplu	1	0.624	0.000241	86.423	-0.047858	0.612	0.00083	144.855	-0.05463
644	54.727	pplu	1	0.626	0.000243	86.54	-0.048865	0.612	0.000832	144.848	-0.054588
645	54.781	pplu	1	0.624	0.000246	86.333	-0.049591	0.614	0.000834	144.86	-0.054547
646	54.835	pplu	1	0.622	0.000249	86.423	-0.050018	0.615	0.000836	145.016	-0.054508
647	54.889	pplu	1	0.621	0.000251	86.983	-0.050134	0.614	0.000838	144.688	-0.054471
648	54.943	pplu	1	0.622	0.000254	86.815	-0.049935	0.613	0.00084	144.461	-0.054438
649	54.997	pplu	1	0.625	0.000256	86.658	-0.049425	0.614	0.000842	144.847	-0.054408
650	55.051	pplu	1	0.626	0.000259	86.494	-0.048611	0.614	0.000844	144.76	-0.054383
651	55.105	pplu	1	0.621	0.000261	86.541	-0.047512	0.613	0.000846	144.684	-0.054364
652	55.159	pplu	1	0.622	0.000264	86.63	-0.04615	0.614	0.000848	144.822	-0.054351
653	55.213	pplu	1	0.623	0.000266	86.728	-0.044554	0.61	0.00085	144.943	-0.054346
654	55.267	pplu	1	0.622	0.000268	86.506	-0.042755	0.613	0.000851	144.774	-0.054347
655	55.321	pplu	1	0.622	0.000271	86.636	-0.040788	0.616	0.000853	144.679	-0.054358
656	55.374	pplu	1	0.622	0.000273	86.559	-0.038692	0.615	0.000855	144.799	-0.054376
657	55.428	pplu	1	0.623	0.000275	86.389	-0.036506	0.613	0.000857	144.627	-0.054403
658	55.482	pplu	1	0.625	0.000277	86.534	-0.034275	0.612	0.000859	144.654	-0.054439
659	55.536	pplu	1	0.626	0.00028	86.75	-0.032045	0.615	0.00086	144.932	-0.054483
660	55.59	pplu	1	0.626	0.000282	86.465	-0.029861	0.616	0.000862	144.937	-0.054536
661	55.644	pplu	1	0.624	0.000284	86.471	-0.02777	0.615	0.000864	144.673	-0.054597
662	55.698	pplu	1	0.622	0.000286	86.428	-0.025817	0.613	0.000865	144.8	-0.054665
663	55.752	pplu	1	0.621	0.000288	86.434	-0.024044	0.613	0.000867	144.858	-0.05474
664	55.806	pplu	1	0.622	0.00029	86.536	-0.022491	0.613	0.000868	144.539	-0.05482
665	55.86	pplu	1	0.622	0.000292	86.483	-0.021192	0.616	0.00087	144.798	-0.054905
666	55.914	pplu	1	0.623	0.000294	86.494	-0.020176	0.618	0.000871	144.755	-0.054993
667	55.968	pplu	1	0.623	0.000296	86.523	-0.019469	0.616	0.000873	144.765	-0.055084
668	56.022	pplu	1	0.626	0.000298	86.338	-0.019089	0.616	0.000874	144.976	-0.055178
669	56.075	pplu	1	0.625	0.0003	86.286	-0.01905	0.615	0.000875	145.018	-0.055272
670	56.129	pplu	1	0.622	0.000302	86.335	-0.019356	0.616	0.000876	144.856	-0.055365
671	56.183	pplu	1	0.622	0.000304	86.53	-0.02001	0.614	0.000877	145.051	-0.055458
672	56.237	pplu	1	0.623	0.000306	86.739	-0.021008	0.614	0.000878	145.023	-0.055548
673	56.291	pplu	1	0.623	0.000308	86.552	-0.02234	0.614	0.000878	144.689	-0.055635
674	56.345	pplu	1	0.624	0.00031	86.432	-0.023988	0.616	0.000879	144.612	-0.055718
675	56.399	pplu	1	0.623	0.000312	86.458	-0.02593	0.617	0.00088	144.749	-0.055795
676	56.453	pplu	1	0.624	0.000314	86.236	-0.028137	0.617	0.00088	144.712	-0.055867
677	56.507	pplu	1	0.625	0.000316	86.256	-0.030575	0.616	0.00088	144.914	-0.055933
678	56.561	pplu	1	0.622	0.000317	86.442	-0.033206	0.615	0.000881	145.114	-0.055991
679	56.615	pplu	1	0.624	0.000319	86.366	-0.035987	0.616	0.000881	144.85	-0.056041
680	56.669	pplu	1	0.622	0.000321	86.286	-0.038871	0.617	0.000881	144.668	-0.056083
681	56.723	pplu	1	0.62	0.000323	86.175	-0.041807	0.617	0.000881	144.681	-0.056117
682	56.777	pplu	1	0.625	0.000325	86.161	-0.044742	0.616	0.00088	144.603	-0.056141
683	56.83	pplu	1	0.625	0.000326	86.462	-0.047621	0.616	0.00088	144.718	-0.056158
684	56.884	pplu	1	0.624	0.000328	86.451	-0.050394	0.616	0.000879	144.819	-0.056166
685	56.938	pplu	1	0.625	0.00033	86.239	-0.05301	0.614	0.000879	144.622	-0.056166
686	56.992	pplu	1	0.626	0.000331	86.301	-0.055423	0.615	0.000878	144.724	-0.056159
687	57.046	pplu	1	0.63	0.000333	86.14	-0.057591	0.615	0.000877	144.672	-0.056145
688	57.1	pplu	1	0.627	0.000335	86.133	-0.059479	0.616	0.000877	144.477	-0.056125
689	57.154	pplu	1	0.625	0.000336	86.222	-0.061057	0.615	0.000876	144.405	-0.0561
690	57.208	pplu	1	0.623	0.000338	86.146	-0.062302	0.616	0.000874	144.635	-0.05607
691	57.262	pplu	1	0.623	0.00034	86.398	-0.063199	0.619	0.000873	144.989	-0.056035
692	57.316	pplu	1	0.622	0.000341	86.339	-0.063739	0.618	0.000872	144.783	-0.055997
693	57.37	pplu	1	0.621	0.000343	86.082	-0.06392	0.618	0.000871	144.764	-0.055955
694	57.424	pplu	1	0.622	0.000345	86.554	-0.063748	0.616	0.000869	144.613	-0.05591
695	57.478	pplu	1	0.625	0.000346	86.642	-0.063236	0.616	0.000868	144.34	-0.055861
696	57.531	pplu	1	0.624	0.000348	86.288	-0.062407	0.617	0.000866	144.462	-0.05581
697	57.585	pplu	1	0.623	0.000349	86.51	-0.061285	0.616	0.000864	144.787	-0.055756
698	57.639	pplu	1	0.625	0.000351	86.578	-0.059901	0.615	0.000863	144.776	-0.055699
699	57.693	pplu	1	0.622	0.000353	86.402	-0.058286	0.613	0.000861	144.877	-0.05564
700	57.747	pplu	1	0.627	0.000354	86.738	-0.056469	0.617	0.000859	144.692	-0.055579
701	57.801	pplu	1	0.623	0.000356	86.52	-0.054483	0.615	0.000857	144.507	-0.055516
702	57.855	pplu	1	0.627	0.000357	86.297	-0.052356	0.617	0.000855	144.543	-0.055452
703	57.909	pplu	1	0.625	0.000359	86.306	-0.050121	0.621	0.000853	144.459	-0.055387
704	57.963	pplu	1	0.626	0.00036	86.382	-0.047811	0.617	0.000851	144.184	-0.055322
705	58.017	pplu	1	0.626	0.000362	86.439	-0.045457	0.619	0.000849	144.34	-0.055259
706	58.071	pplu	1	0.624	0.000364	86.702	-0.043094	0.616	0.000847	144.46	-0.055198
707	58.125	pplu	1	0.625	0.000365	86.496	-0.040751	0.619	0.000845	144.521	-0.055142
708	58.179	pplu	1	0.627	0.000367	86.633	-0.038458	0.616	0.000842	144.565	-0.055091
709	58.232	pplu	1	0.626	0.000369	86.507	-0.036245	0.614	0.00084	144.494	-0.055047
710	58.286	pplu	1	0.624	0.00037	86.61	-0.034137	0.617	0.000838	144.238	-0.055012
711	58.34	pplu	1	0.622	0.000372	86.562	-0.032162	0.616	0.000836	144.281	-0.054987
712	58.394	pplu	1	0.625	0.000374	86.388	-0.030345	0.617	0.000833	144.497	-0.054975
713	58.448	pplu	1	0.624	0.000375	86.443	-0.028712	0.617	0.000831	144.408	-0.054975
714	58.502	pplu	1	0.626	0.000377	86.581	-0.027286	0.616	0.000829	144.423	-0.05499
715	58.556	pplu	1	0.625	0.000379	86.356	-0.02609	0.616	0.000827	144.768	-0.055021
716	58.61	pplu	1	0.626	0.000381	86.236	-0.025147	0.619	0.000824	144.562	-0.055069
717	58.664	pplu	1	0.627	0.000383	86.24	-0.024478	0.615	0.000822	144.782	-0.055133
718	58.718	pplu	1	0.623	0.000384	86.244	-0.024101	0.615	0.00082	144.841	-0.055214
719	58.772	pplu	1	0.624	0.000386	86.136	-0.024028	0.617	0.000817	144.627	-0.055312
720	58.826	pplu	1	0.625	0.000388	86.29	-0.024264	0.619	0.000815	144.521	-0.055427
721	58.88	pplu	1	0.626	0.00039	86.167	-0.024813	0.617	0.000813	144.674	-0.055559
722	58.933	pplu	1	0.625	0.000392	86.08	-0.025675	0.614	0.00081	144.58	-0.055705
723	58.987	pplu	1	0.627	0.000394	86.221	-0.026845	0.616	0.000808	144.39	-0.055865
724	59.041	pplu	1	0.624	0.000396	86.172	-0.028313	0.62	0.000806	144.877	-0.056038
725	59.095	pplu	1	0.623	0.000398	86.121	-0.030061	0.619	0.000803	144.63	-0.056222
726	59.149	pplu	1	0.624	0.000399	86.004	-0.032066	0.62	0.000801	144.668	-0.056415
727	59.203	pplu	1	0.624	0.000401	86.123	-0.0343	0.621	0.000799	144.893	-0.056615
728	59.257	pplu	1	0.624	0.000403	86.325	-0.036732	0.619	0.000796	144.693	-0.05682
729	59.311	pplu	1	0.625	0.000405	86.098	-0.039326	0.617	0.000794	144.699	-0.057028
730	59.365	pplu	1	0.626	0.000407	86.021	-0.042042	0.618	0.000792	144.611	-0.057238
731	59.419	pplu	1	0.625	0.000409	86.363	-0.044834	0.617	0.000789	144.56	-0.057448
732	59.473	pplu	1	0.624	0.000411	86.462	-0.047656	0.616	0.000787	144.586	-0.057656
733	59.527	pplu	1	0.622	0.000413	86.119	-0.050458	0.618	0.000785	144.656	-0.057862
734	59.581	pplu	1	0.624	0.000414	85.936	-0.05319	0.621	0.000783	144.416	-0.058064
735	59.635	pplu	1	0.626	0.000416	86.362	-0.055806	0.621	0.00078	144.487	-0.05826
736	59.688	pplu	1	0.625	0.000418	86.457	-0.058255	0.619	0.000778	144.568	-0.058452
737	59.742	pplu	1	0.623	0.00042	86.217	-0.060492	0.616	0.000776	144.378	-0.058637
738	59.796	pplu	1	0.626	0.000422	86.181	-0.06247	0.617	0.000774	144.393	-0.058815
739	59.85	pplu	1	0.628	0.000424	86.378	-0.064147	0.617	0.000772	144.605	-0.058988
740	59.904	pplu	1	0.624	0.000425	86.349	-0.065488	0.618	0.00077	144.533	-0.059154
741	59.958	pplu	1	0.627	0.000427	86.26	-0.066463	0.617	0.000768	144.421	-0.059314
742	60.012	pplu	1	0.625	0.000429	86.398	-0.067052	0.618	0.000766	144.509	-0.059468
743	60.066	pplu	1	0.625	0.00043	86.606	-0.067242	0.618	0.000764	144.506	-0.059617
744	60.12	pplu	1	0.626	0.000432	86.47	-0.067029	0.617	0.000762	144.501	-0.059761
745	60.174	pplu	1	0.627	0.000434	86.243	-0.066418	0.619	0.000761	144.588	-0.0599
746	60.228	pplu	1	0.625	0.000436	86.128	-0.065425	0.618	0.000759	144.513	-0.060033
747	60.282	pplu	1	0.626	0.000437	86.265	-0.064074	0.618	0.000757	144.498	-0.06016
748	60.336	pplu	1	0.627	0.000439	86.268	-0.062394	0.619	0.000755	144.56	-0.060279
749	60.389	pplu	1	0.627	0.00044	86.019	-0.060424	0.62	0.000754	144.531	-0.060391
750	60.443	pplu	1	0.625	0.000442	86.38	-0.058205	0.62	0.000752	144.563	-0.060494
751	60.497	pplu	1	0.625	0.000444	86.413	-0.055781	0.621	0.000751	144.732	-0.060585
752	60.551	pplu	1	0.622	0.000445	86.231	-0.053198	0.619	0.000749	144.784	-0.060664
753	60.605	pplu	1	0.624	0.000447	86.182	-0.050505	0.618	0.000748	144.537	-0.060727
754	60.659	pplu	1	0.624	0.000448	86.083	-0.047747	0.615	0.000747	144.457	-0.060773
755	60.713	pplu	1	0.626	0.00045	86.409	-0.044966	0.619	0.000746	144.834	-0.0608
756	60.767	pplu	1	0.626	0.000451	86.486	-0.042205	0.62	0.000744	144.84	-0.060804
757	60.821	pplu	1	0.63	0.000453	86.322	-0.0395	0.62	0.000743	144.759	-0.060784
758	60.875	pplu	1	0.63	0.000454	86.154	-0.036886	0.619	0.000742	144.755	-0.060736
759	60.929	pplu	1	0.629	0.000455	86.19	-0.034394	0.619	0.000741	144.563	-0.060658
760	60.983	pplu	1	0.629	0.000457	86.365	-0.032053	0.617	0.00074	144.437	-0.060548
761	61.037	pplu	1	0.626	0.000458	86.463	-0.029885	0.618	0.00074	144.816	-0.060403
762	61.09	pplu	1	0.622	0.00046	86.286	-0.027911	0.62	0.000739	144.672	-0.060222
763	61.144	pplu	1	0.626	0.000461	86.546	-0.026148	0.62	0.000738	144.623	-0.060003
764	61.198	pplu	1	0.625	0.000462	86.406	-0.024612	0.618	0.000738	144.467	-0.059744
765	61.252	pplu	1	0.624	0.000464	86.277	-0.023315	0.619	0.000737	144.066	-0.059445
766	61.306	pplu	1	0.627	0.000465	86.195	-0.022264	0.62	0.000737	144.164	-0.059105
767	61.36	pplu	1	0.626	0.000466	86.158	-0.021467	0.619	0.000736	144.319	-0.058724
768	61.414	pplu	1	0.629	0.000467	86.027	-0.020922	0.619	0.000736	144.438	-0.058301
769	61.468	pplu	1	0.623	0.000469	86.414	-0.020628	0.617	0.000736	144.293	-0.057838
770	61.522	pplu	1	0.622	0.00047	86.197	-0.020575	0.62	0.000735	144.331	-0.057336
771	61.576	pplu	1	0.623	0.000471	86.242	-0.020751	0.621	0.000735	144.437	-0.056797
772	61.63	pplu	1	0.623	0.000472	86.225	-0.021142	0.619	0.000735	144.232	-0.056221
773	61.684	pplu	1	0.623	0.000473	86.015	-0.02173	0.619	0.000735	144.183	-0.055612
774	61.738	pplu	1	0.628	0.000475	85.944	-0.022494	0.621	0.000735	144.237	-0.054971
775	61.791	pplu	1	0.627	0.000476	85.98	-0.023412	0.621	0.000735	144.159	-0.054301
776	61.845	pplu	1	0.626	0.000477	86.136	-0.024462	0.62	0.000735	144.263	-0.053605
777	61.899	pplu	1	0.626	0.000478	86.256	-0.025619	0.618	0.000735	144.504	-0.052886
778	61.953	pplu	1	0.626	0.000479	86.051	-0.026863	0.621	0.000735	144.154	-0.052147
779	62.007	pplu	1	0.629	0.00048	85.885	-0.028172	0.62	0.000735	144.497	-0.051391
780	62.061	pplu	1	0.627	0.000481	85.807	-0.029527	0.62	0.000735	144.388	-0.050621
781	62.115	pplu	1	0.625	0.000482	86.025	-0.030909	0.622	0.000735	144.447	-0.04984
782	62.169	pplu	1	0.626	0.000483	86.123	-0.0323	0.619	0.000735	144.413	-0.049053
783	62.223	pplu	1	0.627	0.000484	86.165	-0.033687	0.619	0.000735	144.237	-0.048261
784	62.277	pplu	1	0.626	0.000485	86.064	-0.035057	0.618	0.000735	143.89	-0.047468
785	62.331	pplu	1	0.628	0.000485	85.977	-0.036396	0.618	0.000736	144.129	-0.046677
786	62.385	pplu	1	0.629	0.000486	86.201	-0.037696	0.618	0.000736	144.312	-0.045892
787	62.439	pplu	1	0.627	0.000487	86.171	-0.038948	0.619	0.000736	144.082	-0.045116
788	62.493	pplu	1	0.629	0.000488	86.033	-0.040146	0.621	0.000736	144.261	-0.044351
789	62.546	pplu	1	0.627	0.000489	86.151	-0.041285	0.622	0.000736	144.505	-0.0436
790	62.6	pplu	1	0.624	0.000489	86.006	-0.042361	0.621	0.000737	144.468	-0.042866
791	62.654	pplu	1	0.625	0.00049	85.89	-0.04337	0.62	0.000737	144.405	-0.042151
792	62.708	pplu	1	0.626	0.000491	86.164	-0.044308	0.62	0.000737	144.237	-0.041457
793	62.762	pplu	1	0.627	0.000492	86.3	-0.045169	0.619	0.000737	144.167	-0.040788
794	62.816	pplu	1	0.626	0.000492	86.222	-0.045943	0.622	0.000738	144.056	-0.040143
795	62.87	pplu	1	0.625	0.000493	86.271	-0.046623	0.622	0.000738	144.362	-0.039526
796	62.924	pplu	1	0.624	0.000493	86.172	-0.047198	0.619	0.000738	144.381	-0.038938
797	62.978	pplu	1	0.623	0.000494	86.147	-0.047655	0.62	0.000739	144.128	-0.038379
798	63.032	pplu	1	0.626	0.000495	86.314	-0.047982	0.622	0.000739	144.149	-0.037851
799	63.086	pplu	1	0.628	0.000495	86.339	-0.048166	0.62	0.000739	144.345	-0.037355
800	63.14	pplu	1	0.628	0.000496	86.304	-0.048194	0.618	0.00074	144.352	-0.036892
801	63.194	pplu	1	0.629	0.000497	86.29	-0.048054	0.621	0.00074	144.383	-0.036462
802	63.247	pplu	1	0.627	0.000497	86.285	-0.047739	0.621	0.00074	144.398	-0.036066
803	63.301	pplu	1	0.626	0.000498	86.323	-0.047241	0.618	0.000741	144.306	-0.035706
804	63.355	pplu	1	0.628	0.000498	86.205	-0.046558	0.621	0.000741	144.294	-0.035381
805	63.409	pplu	1	0.628	0.000499	86.112	-0.045692	0.622	0.000741	144.211	-0.035092
806	63.463	pplu	1	0.626	0.0005	86.064	-0.044654	0.624	0.000742	144.225	-0.03484
807	63.517	pplu	1	0.626	0.0005	86.115	-0.043457	0.623	0.000742	144.418	-0.034625
808	63.571	pplu	1	0.627	0.000501	86.286	-0.04212	0.618	0.000742	144.183	-0.034446
809	63.625	pplu	1	0.628	0.000502	86.125	-0.040666	0.62	0.000743	144.311	-0.034305
810	63.679	pplu	1	0.627	0.000502	85.95	-0.039122	0.624	0.000743	144.562	-0.034199
811	63.733	pplu	1	0.626	0.000503	86.12	-0.037519	0.621	0.000743	144.362	-0.03413
812	63.787	pplu	1	0.626	0.000504	86.256	-0.035891	0.619	0.000744	144.412	-0.034095
813	63.841	pplu	1	0.627	0.000505	86.084	-0.034273	0.618	0.000744	144.574	-0.034095
814	63.895	pplu	1	0.63	0.000505	86.244	-0.0327	0.623	0.000744	144.425	-0.034128
815	63.948	pplu	1	0.627	0.000506	86.301	-0.031204	0.622	0.000745	144.259	-0.034192
816	64.002	pplu	1	0.627	0.000507	86.086	-0.029812	0.622	0.000745	144.461	-0.034286
817	64.056	pplu	1	0.628	0.000508	86.203	-0.02855	0.62	0.000745	144.388	-0.034409
818	64.11	pplu	1	0.625	0.000509	86.194	-0.02744	0.62	0.000746	144.436	-0.034557
819	64.164	pplu	1	0.628	0.000509	86.26	-0.0265	0.623	0.000746	144.412	-0.034729
820	64.218	pplu	1	0.627	0.00051	86.361	-0.025743	0.621	0.000746	144.424	-0.034922
821	64.272	pplu	1	0.628	0.000511	86.029	-0.02518	0.623	0.000747	144.417	-0.035134
822	64.326	pplu	1	0.627	0.000512	86.273	-0.024814	0.618	0.000747	144.528	-0.035362
823	64.38	pplu	1	0.63	0.000513	86.388	-0.024643	0.623	0.000747	144.748	-0.035603
824	64.434	pplu	1	0.627	0.000514	86.114	-0.024662	0.623	0.000747	144.44	-0.035856
825	64.488	pplu	1	0.63	0.000515	86.067	-0.024859	0.621	0.000748	144.375	-0.036118
826	64.542	pplu	1	0.623	0.000516	86.199	-0.025223	0.622	0.000748	144.399	-0.036387
827	64.596	pplu	1	0.622	0.000517	85.948	-0.025737	0.625	0.000748	144.165	-0.036661
828	64.649	pplu	1	0.631	0.000518	86.193	-0.026386	0.623	0.000749	144.459	-0.036938
829	64.703	pplu	1	0.63	0.000519	85.993	-0.027151	0.624	0.000749	144.327	-0.037217
830	64.757	pplu	1	0.63	0.00052	86.016	-0.028013	0.62	0.000749	143.971	-0.037497
831	64.811	pplu	1	0.629	0.000521	86.077	-0.028953	0.619	0.00075	144.183	-0.037778
832	64.865	pplu	1	0.629	0.000522	86.034	-0.029953	0.623	0.00075	144.352	-0.038057
833	64.919	pplu	1	0.629	0.000523	86.257	-0.030998	0.621	0.000751	144.488	-0.038336
834	64.973	pplu	1	0.629	0.000524	85.904	-0.032072	0.621	0.000751	144.36	-0.038615
835	65.027	pplu	1	0.629	0.000525	85.692	-0.033164	0.621	0.000752	144.183	-0.038894
836	65.081	pplu	1	0.629	0.000526	85.918	-0.034264	0.622	0.000753	144.024	-0.039173
837	65.135	pplu	1	0.629	0.000527	85.944	-0.035363	0.621	0.000753	144.135	-0.039452
838	65.189	pplu	1	0.631	0.000528	86.215	-0.036455	0.62	0.000754	144.044	-0.039733
839	65.243	pplu	1	0.631	0.000529	86.178	-0.037534	0.622	0.000755	144.201	-0.040016
840	65.297	pplu	1	0.624	0.00053	85.931	-0.038595	0.621	0.000755	144.205	-0.0403
841	65.351	pplu	1	0.627	0.000532	85.547	-0.039629	0.622	0.000756	144.458	-0.040585
842	65.404	pplu	1	0.626	0.000533	85.87	-0.040628	0.624	0.000757	144.539	-0.04087
843	65.458	pplu	1	0.627	0.000534	86.127	-0.041581	0.624	0.000758	144.258	-0.041156
844	65.512	pplu	1	0.63	0.000535	86.073	-0.042479	0.624	0.000758	144.444	-0.041441
845	65.566	pplu	1	0.63	0.000536	85.975	-0.043312	0.624	0.000759	144.559	-0.041723
846	65.62	pplu	1	0.63	0.000537	86.035	-0.044072	0.623	0.00076	144.543	-0.042002
847	65.674	pplu	1	0.629	0.000539	85.729	-0.044753	0.625	0.000761	144.534	-0.042275
848	65.728	pplu	1	0.628	0.00054	86.034	-0.045344	0.622	0.000762	144.436	-0.04254
849	65.782	pplu	1	0.628	0.000541	85.776	-0.045838	0.621	0.000763	144.342	-0.042796
850	65.836	pplu	1	0.628	0.000542	85.981	-0.046226	0.621	0.000764	144.301	-0.043039
851	65.89	pplu	1	0.627	0.000543	85.801	-0.046505	0.622	0.000765	144.441	-0.043269
852	65.944	pplu	1	0.627	0.000545	85.759	-0.046674	0.624	0.000766	144.315	-0.043481
853	65.998	pplu	1	0.627	0.000546	86.211	-0.046737	0.622	0.000767	144.23	-0.043674
854	66.052	pplu	1	0.629	0.000547	86.375	-0.046698	0.622	0.000768	144.253	-0.043845
855	66.105	pplu	1	0.63	0.000549	86.172	-0.046564	0.623	0.000769	144.242	-0.043991
856	66.159	pplu	1	0.627	0.00055	86.065	-0.046342	0.623	0.00077	144.27	-0.044112
857	66.213	pplu	1	0.63	0.000551	86.046	-0.046038	0.621	0.000771	144.105	-0.044204
858	66.267	pplu	1	0.631	0.000553	86.031	-0.045659	0.62	0.000772	144.402	-0.044266
859	66.321	pplu	1	0.631	0.000554	86.164	-0.045213	0.621	0.000774	144.557	-0.044297
860	66.375	pplu	1	0.629	0.000555	86.287	-0.044702	0.623	0.000775	144.324	-0.044295
861	66.429	pplu	1	0.628	0.000557	86.108	-0.044132	0.625	0.000776	144.155	-0.044261
862	66.483	pplu	1	0.63	0.000558	86.048	-0.043505	0.622	0.000777	143.879	-0.044193
863	66.537	pplu	1	0.627	0.00056	86.14	-0.042827	0.625	0.000779	143.888	-0.044092
864	66.591	pplu	1	0.628	0.000561	86.088	-0.042101	0.626	0.00078	144.059	-0.043958
865	66.645	pplu	1	0.632	0.000562	86.053	-0.041333	0.623	0.000781	144.394	-0.043794
866	66.699	pplu	1	0.63	0.000564	86.145	-0.040525	0.624	0.000783	144.051	-0.043599
867	66.753	pplu	1	0.629	0.000565	86.114	-0.03968	0.623	0.000784	143.855	-0.043377
868	66.806	pplu	1	0.629	0.000567	85.953	-0.038802	0.623	0.000785	143.739	-0.043128
869	66.86	pplu	1	0.63	0.000568	86.054	-0.037894	0.623	0.000787	143.944	-0.042857
870	66.914	pplu	1	0.63	0.000569	86.193	-0.036967	0.622	0.000788	143.887	-0.042564
871	66.968	pplu	1	0.628	0.000571	85.975	-0.036029	0.622	0.00079	144.002	-0.042254
872	67.022	pplu	1	0.629	0.000572	85.993	-0.035094	0.623	0.000791	143.773	-0.041928
873	67.076	pplu	1	0.629	0.000574	86.037	-0.034174	0.625	0.000792	144.051	-0.041591
874	67.13	pplu	1	0.631	0.000575	86.005	-0.033281	0.624	0.000794	143.86	-0.041244
875	67.184	pplu	1	0.626	0.000576	86.1	-0.032426	0.624	0.000796	144.024	-0.040891
876	67.238	pplu	1	0.625	0.000578	85.995	-0.031618	0.622	0.000797	144.216	-0.040535
877	67.292	pplu	1	0.629	0.000579	86.329	-0.030864	0.622	0.000799	144.034	-0.040178
878	67.346	pplu	1	0.627	0.00058	86.011	-0.030169	0.621	0.0008	144.151	-0.039824
879	67.4	pplu	1	0.627	0.000582	85.925	-0.029535	0.624	0.000802	144.151	-0.039475
880	67.454	pplu	1	0.63	0.000583	86.071	-0.028965	0.623	0.000804	144.046	-0.039134
881	67.507	pplu	1	0.629	0.000584	85.956	-0.028457	0.624	0.000805	144.234	-0.038804
882	67.561	pplu	1	0.628	0.000586	85.869	-0.028011	0.628	0.000807	144.357	-0.038486
883	67.615	pplu	1	0.627	0.000587	86.181	-0.027624	0.623	0.000809	144.024	-0.038183
884	67.669	pplu	1	0.63	0.000588	85.948	-0.027288	0.623	0.00081	144.115	-0.037896
885	67.723	pplu	1	0.629	0.000589	86.141	-0.026996	0.626	0.000812	144.084	-0.037628
886	67.777	pplu	1	0.632	0.00059	86.026	-0.026738	0.624	0.000814	144.097	-0.037378
887	67.831	pplu	1	0.632	0.000592	86.068	-0.026506	0.623	0.000816	144.085	-0.03715
888	67.885	pplu	1	0.626	0.000593	85.885	-0.026297	0.624	0.000817	144.335	-0.036943
889	67.939	pplu	1	0.632	0.000594	85.813	-0.026107	0.624	0.000819	144.163	-0.036758
890	67.993	pplu	1	0.632	0.000595	85.97	-0.025937	0.624	0.000821	144.126	-0.036596
891	68.047	pplu	1	0.63	0.000596	86.005	-0.025785	0.627	0.000822	144.491	-0.036458
892	68.101	pplu	1	0.631	0.000597	85.878	-0.025651	0.626	0.000824	144.517	-0.036342
893	68.155	pplu	1	0.633	0.000598	85.964	-0.025536	0.624	0.000826	144.358	-0.036248
894	68.209	pplu	1	0.631	0.000599	85.924	-0.025439	0.624	0.000827	144.135	-0.036177
895	68.262	pplu	1	0.63	0.0006	85.885	-0.025362	0.622	0.000829	144.079	-0.036127
896	68.316	pplu	1	0.629	0.000601	85.779	-0.025303	0.621	0.00083	144.03	-0.036098
897	68.37	pplu	1	0.63	0.000602	85.782	-0.025259	0.622	0.000832	144.242	-0.036088
898	68.424	pplu	1	0.629	0.000603	85.778	-0.025225	0.624	0.000833	144.379	-0.036098
899	68.478	pplu	1	0.629	0.000603	85.84	-0.025193	0.626	0.000835	144.118	-0.036126
900	68.532	pplu	1	0.628	0.000604	85.729	-0.025154	0.624	0.000836	144.126	-0.036172
901	68.586	pplu	1	0.63	0.000605	85.958	-0.025098	0.625	0.000838	144.279	-0.036234
902	68.64	pplu	1	0.626	0.000606	85.95	-0.025015	0.628	0.000839	144.279	-0.036311
903	68.694	pplu	1	0.628	0.000607	85.791	-0.024898	0.626	0.00084	144.099	-0.036402
904	68.748	pplu	1	0.627	0.000607	85.973	-0.02474	0.625	0.000841	143.939	-0.036506
905	68.802	pplu	1	0.627	0.000608	86.131	-0.02454	0.626	0.000843	143.97	-0.036623
906	68.856	pplu	1	0.63	0.000609	86.047	-0.024302	0.626	0.000844	144.02	-0.03675
907	68.91	pplu	1	0.628	0.000609	86.118	-0.02403	0.624	0.000845	144.107	-0.036886
908	68.963	pplu	1	0.628	0.00061	85.786	-0.02373	0.623	0.000846	144.203	-0.03703
909	69.017	pplu	1	0.63	0.000611	85.699	-0.023408	0.623	0.000846	144.242	-0.037181
910	69.071	pplu	1	0.63	0.000611	85.849	-0.023069	0.627	0.000847	144.17	-0.037335
911	69.125	pplu	1	0.632	0.000612	85.893	-0.02272	0.626	0.000848	144.195	-0.037493
912	69.179	pplu	1	0.631	0.000612	86.064	-0.022368	0.625	0.000848	144.186	-0.037651
913	69.233	pplu	1	0.628	0.000613	86.25	-0.022025	0.625	0.000849	143.955	-0.037807
914	69.287	pplu	1	0.63	0.000613	85.654	-0.021698	0.624	0.000849	144.233	-0.037959
915	69.341	pplu	1	0.631	0.000614	85.605	-0.021398	0.624	0.000849	144.33	-0.038105
916	69.395	pplu	1	0.632	0.000614	85.594	-0.021129	0.624	0.00085	144.101	-0.038241
917	69.449	pplu	1	0.629	0.000615	85.777	-0.020894	0.628	0.00085	144.143	-0.038364
918	69.503	pplu	1	0.63	0.000615	86.049	-0.020695	0.626	0.00085	144.439	-0.038472
919	69.557	pplu	1	0.629	0.000615	86.045	-0.02053	0.621	0.00085	144.284	-0.038562
920	69.611	pplu	1	0.628	0.000616	85.809	-0.020396	0.626	0.000849	144.531	-0.03863
921	69.664	pplu	1	0.631	0.000616	85.812	-0.020294	0.626	0.000849	144.552	-0.038675
922	69.718	pplu	1	0.634	0.000616	85.895	-0.020223	0.625	0.000848	144.25	-0.038692
923	69.772	pplu	1	0.631	0.000617	85.938	-0.020184	0.624	0.000848	144.249	-0.038681
924	69.826	pplu	1	0.629	0.000617	85.937	-0.020181	0.623	0.000847	144.42	-0.038638
925	69.88	pplu	1	0.631	0.000617	85.856	-0.020213	0.624	0.000847	144.36	-0.038562
926	69.934	pplu	1	0.631	0.000617	85.827	-0.02028	0.625	0.000846	144.303	-0.03845
927	69.988	pplu	1	0.63	0.000617	85.961	-0.020381	0.627	0.000845	144.016	-0.038303
928	70.042	pplu	1	0.629	0.000618	86.204	-0.020511	0.626	0.000844	144.285	-0.038118
929	70.096	pplu	1	0.63	0.000618	86.26	-0.020667	0.628	0.000843	144.016	-0.037895
930	70.15	pplu	1	0.629	0.000618	86.058	-0.020841	0.627	0.000841	143.483	-0.037634
931	70.204	pplu	1	0.627	0.000618	85.87	-0.021024	0.628	0.00084	143.859	-0.037335
932	70.258	pplu	1	0.629	0.000618	85.876	-0.021206	0.626	0.000839	144.133	-0.036999
933	70.312	pplu	1	0.631	0.000618	86.038	-0.021374	0.625	0.000837	144.203	-0.036628
934	70.365	pplu	1	0.632	0.000618	86.01	-0.021516	0.627	0.000836	144	-0.036224
935	70.419	pplu	1	0.63	0.000618	85.923	-0.021619	0.627	0.000834	143.968	-0.035787
936	70.473	pplu	1	0.63	0.000618	85.996	-0.021674	0.625	0.000832	143.756	-0.035322
937	70.527	pplu	1	0.633	0.000618	85.977	-0.021672	0.626	0.00083	143.762	-0.034828
938	70.581	pplu	1	0.632	0.000618	85.962	-0.021608	0.628	0.000828	143.886	-0.03431
939	70.635	pplu	1	0.633	0.000618	86.089	-0.021479	0.626	0.000826	143.976	-0.03377
940	70.689	pplu	1	0.632	0.000618	86.148	-0.021284	0.631	0.000824	143.987	-0.033211
941	70.743	pplu	1	0.633	0.000618	86.006	-0.021023	0.625	0.000822	143.949	-0.032634
942	70.797	pplu	1	0.632	0.000618	86.061	-0.0207	0.628	0.00082	144.067	-0.032043
943	70.851	pplu	1	0.631	0.000618	86.04	-0.020323	0.628	0.000818	143.981	-0.03144
944	70.905	pplu	1	0.629	0.000618	86.024	-0.019901	0.627	0.000815	143.794	-0.030827
945	70.959	pplu	1	0.628	0.000618	86.067	-0.019444	0.626	0.000813	144.103	-0.030206
946	71.013	pplu	1	0.634	0.000618	86.057	-0.018965	0.628	0.00081	143.904	-0.029578
947	71.067	pplu	1	0.63	0.000619	85.921	-0.018475	0.628	0.000807	143.716	-0.028946
948	71.12	pplu	1	0.635	0.000619	86.046	-0.017988	0.629	0.000804	143.761	-0.028311
949	71.174	pplu	1	0.633	0.000619	85.954	-0.017514	0.626	0.000802	144.037	-0.027675
950	71.228	pplu	1	0.63	0.000619	85.691	-0.017062	0.625	0.000799	143.934	-0.027039
951	71.282	pplu	1	0.632	0.000619	85.636	-0.016641	0.627	0.000796	143.877	-0.026404
952	71.336	pplu	1	0.631	0.000619	85.946	-0.016261	0.628	0.000792	144.191	-0.025771
953	71.39	pplu	1	0.631	0.000619	85.676	-0.01593	0.629	0.000789	144.043	-0.025142
954	71.444	pplu	1	0.629	0.000619	86.006	-0.015658	0.626	0.000786	143.872	-0.024517
955	71.498	pplu	1	0.63	0.000619	86.02	-0.015453	0.629	0.000783	143.821	-0.023897
956	71.552	pplu	1	0.632	0.000619	85.837	-0.015322	0.628	0.000779	143.935	-0.023283
957	71.606	pplu	1	0.631	0.000619	85.696	-0.01527	0.627	0.000776	144.027	-0.022675
958	71.66	pplu	1	0.63	0.000619	85.847	-0.015296	0.628	0.000772	144.232	-0.022073
959	71.714	pplu	1	0.631	0.000619	85.775	-0.015399	0.628	0.000769	144.284	-0.021478
960	71.768	pplu	1	0.635	0.000619	85.984	-0.01557	0.625	0.000765	144.03	-0.02089
961	71.821	pplu	1	0.633	0.000619	86.042	-0.015798	0.626	0.000761	144.037	-0.020309
962	71.875	pplu	1	0.631	0.00062	85.792	-0.016068	0.629	0.000758	144.118	-0.019734
963	71.929	pplu	1	0.631	0.00062	85.896	-0.016364	0.629	0.000754	144.106	-0.019166
964	71.983	pplu	1	0.63	0.00062	86.116	-0.016665	0.628	0.00075	143.872	-0.018604
965	72.037	pplu	1	0.631	0.00062	85.715	-0.01695	0.627	0.000747	143.839	-0.018049
966	72.091	pplu	1	0.629	0.00062	85.701	-0.017195	0.628	0.000743	143.97	-0.017501
967	72.145	pplu	1	0.63	0.00062	85.69	-0.017374	0.627	0.000739	143.921	-0.016961
968	72.199	pplu	1	0.634	0.000621	85.628	-0.017465	0.629	0.000736	144.011	-0.016428
969	72.253	pplu	1	0.634	0.000621	85.799	-0.017447	0.629	0.000732	143.98	-0.015903
970	72.307	pplu	1	0.635	0.000621	86.181	-0.017304	0.627	0.000728	143.979	-0.015388
971	72.361	pplu	1	0.634	0.000621	85.903	-0.017024	0.628	0.000725	144.071	-0.014883
972	72.415	pplu	1	0.633	0.000621	85.998	-0.0166	0.629	0.000721	144.016	-0.014389
973	72.469	pplu	1	0.635	0.000622	85.916	-0.01603	0.629	0.000718	144.008	-0.013908
974	72.522	pplu	1	0.632	0.000622	85.715	-0.015316	0.629	0.000714	143.989	-0.013441
975	72.576	pplu	1	0.632	0.000622	85.597	-0.014469	0.627	0.000711	143.93	-0.012988
976	72.63	pplu	1	0.632	0.000622	85.725	-0.013503	0.629	0.000708	143.804	-0.012552
977	72.684	pplu	1	0.631	0.000623	85.529	-0.012435	0.628	0.000705	143.902	-0.012134
978	72.738	pplu	1	0.631	0.000623	85.936	-0.011286	0.628	0.000701	143.977	-0.011735
979	72.792	pplu	1	0.633	0.000623	85.769	-0.010076	0.628	0.000698	143.952	-0.011355
980	72.846	pplu	1	0.634	0.000623	85.912	-0.008828	0.627	0.000695	143.971	-0.010996
981	72.9	pplu	1	0.633	0.000624	85.653	-0.007563	0.627	0.000692	143.99	-0.01066
982	72.954	pplu	1	0.635	0.000624	85.573	-0.006305	0.629	0.000689	144.074	-0.010346
983	73.008	pplu	1	0.634	0.000624	85.716	-0.005075	0.63	0.000687	144.179	-0.010056
984	73.062	pplu	1	0.634	0.000624	85.771	-0.003894	0.631	0.000684	144.089	-0.009791
985	73.116	pplu	1	0.633	0.000625	85.802	-0.002782	0.63	0.000681	143.981	-0.00955
986	73.17	pplu	1	0.632	0.000625	85.784	-0.001755	0.629	0.000679	144.067	-0.009335
987	73.223	pplu	1	0.633	0.000625	85.858	-0.000823	0.628	0.000676	143.895	-0.009146
988	73.277	pplu	1	0.633	0.000625	85.941	5e-06	0.626	0.000674	143.804	-0.008982
989	73.331	pplu	1	0.632	0.000625	85.88	0.000724	0.627	0.000671	144.135	-0.008843
990	73.385	pplu	1	0.631	0.000625	85.857	0.001333	0.629	0.000669	144.207	-0.00873
991	73.439	pplu	1	0.634	0.000625	85.909	0.001831	0.629	0.000667	144.11	-0.008642
992	73.493	pplu	1	0.635	0.000625	85.915	0.002219	0.629	0.000665	144.205	-0.008578
993	73.547	pplu	1	0.633	0.000625	85.999	0.002497	0.629	0.000663	144.329	-0.008539
994	73.601	pplu	1	0.634	0.000625	86.102	0.002669	0.63	0.000661	144.185	-0.008522
995	73.655	pplu	1	0.632	0.000625	86.099	0.002741	0.629	0.00066	143.938	-0.008528
996	73.709	pplu	1	0.631	0.000625	86.205	0.002715	0.629	0.000658	143.75	-0.008556
997	73.763	pplu	1	0.633	0.000625	86.142	0.002595	0.629	0.000657	143.812	-0.008606
998	73.817	pplu	1	0.633	0.000625	85.844	0.002385	0.628	0.000655	143.994	-0.008675
999	73.871	pplu	1	0.635	0.000625	85.8	0.00209	0.627	0.000654	144.324	-0.008763
1000	73.925	pplu	1	0.634	0.000624	85.844	0.001718	0.626	0.000652	144.372	-0.008869
1001	73.978	pplu	1	0.634	0.000624	85.825	0.001277	0.63	0.000651	143.984	-0.008992
1002	74.032	pplu	1	0.634	0.000624	85.977	0.000778	0.631	0.00065	144.051	-0.00913
1003	74.086	pplu	1	0.634	0.000623	86.005	0.000232	0.63	0.000649	144.072	-0.009282
1004	74.14	pplu	1	0.633	0.000623	85.798	-0.00035	0.63	0.000648	144.031	-0.009447
1005	74.194	pplu	1	0.632	0.000623	85.956	-0.000953	0.628	0.000647	144.038	-0.009624
1006	74.248	pplu	1	0.633	0.000622	85.903	-0.001562	0.628	0.000647	144.041	-0.00981
1007	74.302	pplu	1	0.634	0.000621	85.844	-0.00216	0.631	0.000646	144.258	-0.010005
1008	74.356	pplu	1	0.636	0.000621	85.899	-0.002732	0.633	0.000645	144.17	-0.010206
1009	74.41	pplu	1	0.635	0.00062	85.842	-0.003263	0.631	0.000645	144.039	-0.010412
1010	74.464	pplu	1	0.635	0.000619	85.814	-0.003741	0.629	0.000644	144.101	-0.01062
1011	74.518	pplu	1	0.634	0.000619	85.915	-0.004155	0.63	0.000644	144.029	-0.010829
1012	74.572	pplu	1	0.633	0.000618	85.845	-0.004493	0.628	0.000643	143.984	-0.011036
1013	74.626	pplu	1	0.632	0.000617	85.845	-0.004741	0.629	0.000643	144.212	-0.011241
1014	74.679	pplu	1	0.633	0.000616	85.899	-0.004889	0.627	0.000643	144.096	-0.01144
1015	74.733	pplu	1	0.634	0.000615	85.631	-0.004926	0.631	0.000642	144.074	-0.011632
1016	74.787	pplu	1	0.633	0.000614	85.653	-0.004846	0.633	0.000642	144.012	-0.011815
1017	74.841	pplu	1	0.633	0.000613	86.004	-0.004641	0.627	0.000642	143.709	-0.011989
1018	74.895	pplu	1	0.633	0.000612	86.093	-0.004307	0.629	0.000642	144.114	-0.012151
1019	74.949	pplu	1	0.633	0.000611	86.068	-0.003837	0.632	0.000642	144.232	-0.0123
1020	75.003	pplu	1	0.635	0.00061	85.996	-0.003227	0.631	0.000642	143.939	-0.012435
1021	75.057	pplu	1	0.636	0.000609	85.899	-0.002473	0.63	0.000642	144.101	-0.012555
1022	75.111	pplu	1	0.638	0.000607	85.971	-0.001575	0.626	0.000642	143.954	-0.01266
1023	75.165	pplu	1	0.636	0.000606	86.172	-0.000529	0.631	0.000643	143.741	-0.012748
1024	75.219	pplu	1	0.635	0.000605	86.155	0.000664	0.629	0.000643	143.965	-0.012819
1025	75.273	pplu	1	0.634	0.000604	86.071	0.002008	0.63	0.000643	144.283	-0.012873
1026	75.327	pplu	1	0.634	0.000602	85.889	0.003505	0.632	0.000643	144.031	-0.01291
1027	75.38	pplu	1	0.634	0.000601	85.729	0.005157	0.628	0.000644	144.128	-0.012931
1028	75.434	pplu	1	0.636	0.000599	85.9	0.006966	0.629	0.000644	144.033	-0.012936
1029	75.488	pplu	1	0.637	0.000598	85.832	0.00893	0.628	0.000645	144.002	-0.012928
1030	75.542	pplu	1	0.636	0.000596	85.808	0.01105	0.628	0.000645	143.917	-0.012907
1031	75.596	pplu	1	0.634	0.000595	86.159	0.013322	0.628	0.000646	143.816	-0.012875
1032	75.65	pplu	1	0.634	0.000593	85.959	0.015743	0.629	0.000646	143.726	-0.012834
1033	75.704	pplu	1	0.635	0.000592	85.865	0.018308	0.63	0.000647	143.526	-0.012786
1034	75.758	pplu	1	0.634	0.00059	86.004	0.021012	0.63	0.000648	143.724	-0.012733
1035	75.812	pplu	1	0.635	0.000589	85.743	0.023847	0.629	0.000648	143.895	-0.012677
1036	75.866	pplu	1	0.637	0.000587	85.728	0.026805	0.63	0.000649	143.825	-0.012621
1037	75.92	pplu	1	0.635	0.000585	85.912	0.029873	0.632	0.00065	143.672	-0.012566
1038	75.974	pplu	1	0.633	0.000583	85.668	0.033038	0.63	0.000651	143.705	-0.012516
1039	76.028	pplu	1	0.637	0.000582	85.563	0.036279	0.629	0.000652	143.775	-0.012471
1040	76.081	pplu	1	0.633	0.00058	85.647	0.039576	0.628	0.000653	143.821	-0.012435
1041	76.135	pplu	1	0.636	0.000578	85.787	0.042906	0.631	0.000654	143.904	-0.012409
1042	76.189	pplu	1	0.635	0.000576	85.745	0.046249	0.632	0.000655	143.828	-0.012396
1043	76.243	pplu	1	0.636	0.000574	85.95	0.049584	0.63	0.000656	143.831	-0.012398
1044	76.297	pplu	1	0.635	0.000572	85.84	0.052896	0.631	0.000657	143.928	-0.012416
1045	76.351	pplu	1	0.634	0.00057	85.604	0.05617	0.632	0.000658	143.891	-0.012453
1046	76.405	pplu	1	0.635	0.000568	85.302	0.059398	0.63	0.000659	143.986	-0.012508
1047	76.459	pplu	1	0.637	0.000566	85.592	0.062572	0.629	0.00066	144.069	-0.012584
1048	76.513	pplu	1	0.633	0.000563	85.661	0.065692	0.63	0.000661	144.007	-0.012682
1049	76.567	pplu	1	0.638	0.000561	86.109	0.068759	0.63	0.000663	144.031	-0.012801
1050	76.621	pplu	1	0.633	0.000559	85.966	0.071778	0.631	0.000664	143.838	-0.012944
1051	76.675	pplu	1	0.636	0.000556	86.065	0.074758	0.63	0.000665	143.832	-0.013109
1052	76.729	pplu	1	0.636	0.000554	86.002	0.077709	0.63	0.000666	144.033	-0.013297
1053	76.783	pplu	1	0.635	0.000552	85.713	0.080644	0.629	0.000667	143.93	-0.013507
1054	76.836	pplu	1	0.634	0.000549	85.587	0.083577	0.631	0.000668	143.991	-0.013739
1055	76.89	pplu	1	0.635	0.000546	85.669	0.086526	0.631	0.000668	144.235	-0.013992
1056	76.944	pplu	1	0.634	0.000544	85.84	0.089509	0.631	0.000669	144.156	-0.014264
1057	76.998	pplu	1	0.636	0.000541	86.078	0.092542	0.63	0.00067	144.003	-0.014553
1058	77.052	pplu	1	0.635	0.000538	85.952	0.095642	0.63	0.000671	144.119	-0.014859
1059	77.106	pplu	1	0.634	0.000535	85.885	0.098824	0.633	0.000672	143.946	-0.015179
1060	77.16	pplu	1	0.635	0.000533	85.569	0.1021	0.631	0.000673	144.099	-0.015511
1061	77.214	pplu	1	0.635	0.00053	85.467	0.105482	0.629	0.000674	144.128	-0.015853
1062	77.268	pplu	1	0.634	0.000527	85.811	0.108977	0.632	0.000675	144.369	-0.016203
1063	77.322	pplu	1	0.634	0.000523	85.967	0.112595	0.63	0.000675	144.346	-0.016559
1064	77.376	pplu	1	0.635	0.00052	86.072	0.116339	0.632	0.000676	144.195	-0.016919
1065	77.43	pplu	1	0.636	0.000517	86.109	0.120214	0.63	0.000677	144.011	-0.017281
1066	77.484	pplu	1	0.637	0.000514	85.933	0.124226	0.629	0.000677	143.96	-0.017643
1067	77.537	pplu	1	0.635	0.000511	85.813	0.128377	0.629	0.000678	143.787	-0.018002
1068	77.591	pplu	1	0.635	0.000507	85.916	0.132663	0.633	0.000679	143.565	-0.018356
1069	77.645	pplu	1	0.635	0.000504	86.081	0.137077	0.632	0.000679	143.921	-0.018705
1070	77.699	pplu	1	0.634	0.0005	86.031	0.141606	0.633	0.00068	144.133	-0.019045
1071	77.753	pplu	1	0.634	0.000497	85.909	0.146234	0.633	0.00068	144.272	-0.019375
1072	77.807	pplu	1	0.633	0.000493	85.919	0.150942	0.629	0.000681	143.693	-0.019693
1073	77.861	pplu	1	0.635	0.000489	85.987	0.155714	0.633	0.000681	143.811	-0.019997
1074	77.915	pplu	1	0.635	0.000485	86.221	0.160529	0.631	0.000682	144.019	-0.020284
1075	77.969	pplu	1	0.637	0.000481	86.318	0.165368	0.631	0.000682	143.999	-0.020554
1076	78.023	pplu	1	0.638	0.000477	86.217	0.170215	0.63	0.000682	143.913	-0.020805
1077	78.077	pplu	1	0.636	0.000473	86.153	0.175052	0.633	0.000683	143.931	-0.021035
1078	78.131	pplu	1	0.634	0.000469	86.108	0.179864	0.633	0.000683	143.979	-0.021242
1079	78.185	pplu	1	0.635	0.000465	86.116	0.184638	0.633	0.000683	144.133	-0.021426
1080	78.238	pplu	1	0.636	0.000461	86.129	0.189363	0.632	0.000683	143.862	-0.021583
1081	78.292	pplu	1	0.635	0.000456	86.132	0.194034	0.633	0.000683	143.899	-0.021714
1082	78.346	pplu	1	0.634	0.000452	86.199	0.198648	0.633	0.000683	144.212	-0.021816
1083	78.4	pplu	1	0.636	0.000447	86.289	0.203211	0.632	0.000683	144.085	-0.021889
1084	78.454	pplu	1	0.636	0.000443	86.252	0.207733	0.633	0.000683	144.171	-0.021931
1085	78.508	pplu	1	0.636	0.000438	86.289	0.21223	0.633	0.000683	144.245	-0.02194
1086	78.562	pplu	1	0.638	0.000433	86.341	0.21672	0.632	0.000683	144.078	-0.021917
1087	78.616	pplu	1	0.638	0.000428	86.138	0.221222	0.632	0.000683	143.889	-0.02186
1088	78.67	pplu	1	0.638	0.000423	86.266	0.225757	0.632	0.000683	144.022	-0.021768
1089	78.724	pplu	1	0.638	0.000418	86.302	0.23035	0.632	0.000682	144.035	-0.021642
1090	78.778	pplu	1	0.636	0.000412	86.226	0.235026	0.631	0.000682	144.078	-0.02148
1091	78.832	pplu	1	0.636	0.000407	86.338	0.23981	0.631	0.000681	144.202	-0.021284
1092	78.886	pplu	1	0.634	0.000402	86.369	0.244729	0.632	0.000681	143.947	-0.021052
1093	78.939	pplu	1	0.635	0.000396	86.108	0.249807	0.633	0.00068	143.747	-0.020785
1094	78.993	pplu	1	0.636	0.00039	86.103	0.255067	0.635	0.00068	143.739	-0.020484
1095	79.047	pplu	1	0.638	0.000384	86.235	0.260532	0.634	0.000679	143.877	-0.020148
1096	79.101	pplu	1	0.635	0.000378	86.069	0.266222	0.632	0.000679	144.122	-0.01978
1097	79.155	pplu	1	0.635	0.000372	86.163	0.272155	0.632	0.000678	144.019	-0.019379
1098	79.209	pplu	1	0.638	0.000366	86.35	0.278345	0.631	0.000677	144.046	-0.018948
1099	79.263	pplu	1	0.633	0.000359	86.26	0.284802	0.632	0.000676	144.133	-0.018487
1100	79.317	pplu	1	0.637	0.000353	86.304	0.29153	0.632	0.000675	143.964	-0.017998
1101	79.371	pplu	1	0.636	0.000346	86.381	0.298528	0.633	0.000674	143.841	-0.017483
1102	79.425	pplu	1	0.637	0.000339	86.238	0.305795	0.633	0.000673	143.47	-0.016942
1103	79.479	pplu	1	0.637	0.000332	86.021	0.313326	0.635	0.000672	143.501	-0.016377
1104	79.533	pplu	1	0.635	0.000325	86.309	0.321116	0.634	0.000671	143.9	-0.015791
1105	79.587	pplu	1	0.637	0.000318	86.378	0.329162	0.632	0.00067	144.063	-0.015183
1106	79.641	pplu	1	0.636	0.00031	86.481	0.337464	0.633	0.000669	143.976	-0.014556
1107	79.694	pplu	1	0.637	0.000302	86.447	0.346021	0.634	0.000668	143.739	-0.013911
1108	79.748	pplu	1	0.637	0.000295	86.596	0.354838	0.633	0.000667	143.875	-0.013249
1109	79.802	pplu	1	0.635	0.000287	86.658	0.363919	0.634	0.000665	143.829	-0.012572
1110	79.856	pplu	1	0.639	0.000279	86.572	0.373274	0.634	0.000664	143.752	-0.011881
1111	79.91	pplu	1	0.638	0.00027	86.438	0.382915	0.634	0.000663	143.659	-0.011178
1112	79.964	pplu	1	0.64	0.000262	86.381	0.392853	0.631	0.000661	143.684	-0.010465
1113	80.018	pplu	1	0.64	0.000254	86.367	0.403098	0.633	0.00066	143.741	-0.009742
1114	80.072	pplu	1	0.64	0.000245	86.222	0.413661	0.633	0.000658	143.852	-0.009013
1115	80.126	pplu	1	0.635	0.000236	86.405	0.424549	0.629	0.000657	143.594	-0.008278
1116	80.18	pplu	1	0.638	0.000227	86.734	0.435771	0.63	0.000656	143.635	-0.007539
1117	80.234	pplu	1	0.638	0.000218	86.724	0.44733	0.634	0.000654	143.78	-0.006798
1118	80.288	pplu	1	0.637	0.000209	86.515	0.45923	0.634	0.000653	143.744	-0.006056
1119	80.342	pplu	1	0.637	0.000199	86.571	0.471467	0.632	0.000651	143.676	-0.005314
1120	80.395	pplu	1	0.633	0.00019	86.455	0.484036	0.631	0.00065	143.867	-0.004574
1121	80.449	pplu	1	0.637	0.00018	86.513	0.496927	0.631	0.000649	143.939	-0.003837
1122	80.503	pplu	1	0.634	0.00017	86.746	0.510131	0.632	0.000647	143.78	-0.003104
1123	80.557	pplu	1	0.641	0.00016	86.547	0.523635	0.634	0.000646	143.978	-0.002377
1124	80.611	pplu	1	0.635	0.00015	86.572	0.537425	0.636	0.000645	143.909	-0.001656
1125	80.665	pplu	1	0.635	0.000139	86.598	0.551487	0.632	0.000644	143.832	-0.000943
1126	80.719	pplu	1	0.64	0.000129	86.836	0.565803	0.634	0.000643	144.084	-0.000238
1127	80.773	pplu	1	0.638	0.000118	86.808	0.58036	0.634	0.000642	143.843	0.000458
1128	80.827	pplu	1	0.639	0.000107	86.786	0.595147	0.633	0.000641	143.759	0.001145
1129	80.881	pplu	1	0.639	9.6e-05	86.943	0.610159	0.629	0.00064	143.833	0.001821
1130	80.935	pplu	1	0.636	8.5e-05	86.896	0.625391	0.632	0.000639	144.155	0.002487
1131	80.989	pplu	1	0.635	7.4e-05	86.704	0.640842	0.633	0.000638	143.89	0.00314
1132	81.043	pplu	1	0.636	6.2e-05	86.735	0.656508	0.633	0.000638	143.891	0.003781
1133	81.096	pplu	1	0.636	5e-05	86.679	0.672387	0.634	0.000637	144.249	0.004409
1134	81.15	pplu	1	0.638	3.9e-05	86.866	0.688478	0.633	0.000637	144.221	0.005023
1135	81.204	pplu	1	0.638	2.7e-05	87.227	0.704783	0.633	0.000636	143.915	0.005621
1136	81.258	pplu	1	0.637	1.5e-05	87.22	0.721307	0.634	0.000636	143.925	0.006203
1137	81.312	pplu	1	0.637	2e-06	87.076	0.738059	0.633	0.000636	144.037	0.006767
1138	81.366	pplu	1	0.637	-1e-05	87.14	0.755054	0.633	0.000636	143.9	0.007311
1139	81.42	pplu	1	0.638	-2.3e-05	87.076	0.772305	0.634	0.000636	143.675	0.007834
1140	81.474	pplu	1	0.637	-3.5e-05	87.126	0.789831	0.634	0.000636	143.77	0.008336
1141	81.528	pplu	1	0.636	-4.8e-05	87.11	0.80765	0.635	0.000636	143.858	0.008814
1142	81.582	pplu	1	0.639	-6.1e-05	87.14	0.825779	0.636	0.000636	143.79	0.009267
1143	81.636	pplu	1	0.641	-7.4e-05	87.444	0.844237	0.634	0.000637	143.777	0.009694
1144	81.69	pplu	1	0.641	-8.7e-05	87.575	0.863042	0.637	0.000637	143.782	0.010094
1145	81.744	pplu	1	0.639	-0.000101	87.627	0.882212	0.635	0.000638	143.968	0.010464
1146	81.797	pplu	1	0.639	-0.000114	87.782	0.90177	0.636	0.000638	144.058	0.010806
1147	81.851	pplu	1	0.638	-0.000128	87.601	0.921737	0.638	0.000639	143.832	0.011116
1148	81.905	pplu	1	0.637	-0.000142	87.42	0.942137	0.636	0.000639	143.672	0.011395
1149	81.959	pplu	1	0.636	-0.000156	87.572	0.962992	0.635	0.00064	143.732	0.011642
1150	82.013	pplu	1	0.635	-0.00017	87.828	0.984326	0.635	0.000641	143.801	0.011857
1151	82.067	pplu	1	0.638	-0.000184	87.978	1.00615	0.633	0.000641	143.837	0.01204
1152	82.121	pplu	1	0.639	-0.000198	87.904	1.0285	0.634	0.000642	143.803	0.01219
1153	82.175	pplu	1	0.638	-0.000212	87.955	1.05136	0.634	0.000643	143.847	0.01231
1154	82.229	pplu	1	0.64	-0.000227	87.894	1.07476	0.634	0.000644	144.032	0.012398
1155	82.283	pplu	1	0.638	-0.000241	87.92	1.09871	0.633	0.000644	144.019	0.012458
1156	82.337	pplu	1	0.636	-0.000256	88.243	1.12322	0.632	0.000645	144.008	0.012489
1157	82.391	pplu	1	0.636	-0.000271	88.165	1.14828	0.634	0.000646	144.068	0.012493
1158	82.445	pplu	1	0.635	-0.000286	88.016	1.17389	0.635	0.000647	143.877	0.012473
1159	82.499	pplu	1	0.637	-0.000301	88.251	1.20005	0.634	0.000648	143.824	0.01243
1160	82.552	pplu	1	0.639	-0.000316	88.282	1.22675	0.633	0.000649	144.039	0.012366
1161	82.606	pplu	1	0.641	-0.000331	88.216	1.25398	0.636	0.00065	144.139	0.012282
1162	82.66	pplu	1	0.638	-0.000346	88.506	1.28174	0.636	0.000651	144.046	0.012183
1163	82.714	pplu	1	0.637	-0.000361	88.449	1.31001	0.633	0.000652	143.995	0.012069
1164	82.768	pplu	1	0.633	-0.000377	88.373	1.33881	0.633	0.000653	144.092	0.011943
1165	82.822	pplu	1	0.637	-0.000392	88.623	1.36814	0.635	0.000654	144.128	0.011809
1166	82.876	pplu	1	0.64	-0.000408	88.6	1.39801	0.638	0.000655	144.131	0.011668
1167	82.93	pplu	1	0.639	-0.000423	88.896	1.42845	0.639	0.000655	144.092	0.011524
1168	82.984	pplu	1	0.638	-0.000439	88.9	1.45947	0.638	0.000656	144.379	0.011378
1169	83.038	pplu	1	0.637	-0.000455	88.909	1.4911	0.635	0.000657	144.419	0.011235
1170	83.092	pplu	1	0.638	-0.000471	89.095	1.52339	0.636	0.000658	144.037	0.011095
1171	83.146	pplu	1	0.635	-0.000487	89.094	1.55636	0.635	0.000659	144.127	0.010963
1172	83.2	pplu	1	0.636	-0.000502	89.071	1.59005	0.635	0.00066	144.289	0.010839
1173	83.253	pplu	1	0.635	-0.000518	89.406	1.62452	0.635	0.000661	144.319	0.010727
1174	83.307	pplu	1	0.637	-0.000534	89.272	1.65981	0.634	0.000662	143.989	0.010629
1175	83.361	pplu	1	0.637	-0.00055	89.133	1.69596	0.637	0.000663	143.955	0.010547
1176	83.415	pplu	1	0.636	-0.000567	89.429	1.73302	0.636	0.000664	144.323	0.010484
1177	83.469	pplu	1	0.637	-0.000583	89.306	1.77102	0.637	0.000665	143.908	0.01044
1178	83.523	pplu	1	0.637	-0.000599	89.279	1.80999	0.635	0.000666	143.59	0.010416
1179	83.577	pplu	1	0.64	-0.000615	89.833	1.84996	0.635	0.000666	143.689	0.010415
1180	83.631	pplu	1	0.638	-0.000631	89.749	1.89095	0.636	0.000667	143.841	0.010436
1181	83.685	pplu	1	0.636	-0.000647	89.839	1.93299	0.633	0.000668	144.039	0.010481
1182	83.739	pplu	1	0.636	-0.000664	89.963	1.9761	0.634	0.000668	144.066	0.010548
1183	83.793	pplu	1	0.643	-0.00068	89.804	2.02029	0.634	0.000669	143.848	0.010639
1184	83.847	pplu	1	0.64	-0.000696	90.051	2.06558	0.634	0.00067	143.757	0.010752
1185	83.901	pplu	1	0.64	-0.000712	90.129	2.11197	0.634	0.00067	143.758	0.010887
1186	83.954	pplu	1	0.637	-0.000729	90.029	2.15947	0.636	0.00067	143.529	0.011043
1187	84.008	pplu	1	0.634	-0.000745	90.4	2.20807	0.633	0.000671	143.788	0.01122
1188	84.062	pplu	1	0.635	-0.000761	90.545	2.25778	0.631	0.000671	144.067	0.011414
1189	84.116	pplu	1	0.637	-0.000778	90.497	2.3086	0.634	0.000671	143.949	0.011626
1190	84.17	pplu	1	0.638	-0.000794	90.585	2.36052	0.634	0.000671	143.554	0.011854
1191	84.224	pplu	1	0.64	-0.00081	90.838	2.41355	0.638	0.000671	143.695	0.012095
1192	84.278	pplu	1	0.639	-0.000826	90.904	2.46769	0.637	0.000671	143.772	0.012349
1193	84.332	pplu	1	0.643	-0.000842	91.027	2.52295	0.634	0.000671	143.669	0.012613
1194	84.386	pplu	1	0.641	-0.000859	91.195	2.57933	0.638	0.000671	143.746	0.012884
1195	84.44	pplu	1	0.639	-0.000875	91.203	2.63684	0.638	0.00067	143.967	0.013163
1196	84.494	pplu	1	0.636	-0.000891	91.295	2.69548	0.636	0.00067	143.873	0.013445
1197	84.548	pplu	1	0.639	-0.000907	91.525	2.75528	0.632	0.000669	143.626	0.013731
1198	84.602	pplu	1	0.64	-0.000923	91.748	2.81624	0.636	0.000668	143.867	0.014017
1199	84.655	pplu	1	0.641	-0.000939	91.836	2.8784	0.636	0.000668	143.922	0.014303
1200	84.709	pplu	1	0.642	-0.000955	92.049	2.94177	0.638	0.000667	143.798	0.014586
1201	84.763	pplu	1	0.638	-0.000971	92.165	3.00637	0.636	0.000666	143.829	0.014866
1202	84.817	pplu	1	0.637	-0.000987	92.245	3.07225	0.635	0.000665	143.971	0.015141
1203	84.871	pplu	1	0.639	-0.001003	92.548	3.1394	0.635	0.000664	144.112	0.015411
1204	84.925	pplu	1	0.639	-0.001019	92.625	3.20787	0.634	0.000662	143.99	0.015674
1205	84.979	pplu	1	0.636	-0.001035	92.39	3.27766	0.634	0.000661	143.795	0.01593
1206	85.033	pplu	1	0.638	-0.001051	92.635	3.3488	0.635	0.00066	143.979	0.016177
1207	85.087	pplu	1	0.64	-0.001067	93.1	3.42132	0.637	0.000658	144.171	0.016417
1208	85.141	pplu	1	0.638	-0.001082	93.308	3.49522	0.636	0.000656	143.898	0.016647
1209	85.195	pplu	1	0.64	-0.001098	93.488	3.57053	0.633	0.000655	144.145	0.016868
1210	85.249	pplu	1	0.642	-0.001114	93.702	3.64726	0.638	0.000653	144.125	0.01708
1211	85.303	pplu	1	0.638	-0.001129	93.833	3.72544	0.636	0.000651	143.968	0.017283
1212	85.357	pplu	1	0.636	-0.001145	94.101	3.80507	0.635	0.000649	144.029	0.017477
1213	85.41	pplu	1	0.636	-0.001161	94.243	3.88616	0.636	0.000647	143.848	0.017662
1214	85.464	pplu	1	0.636	-0.001176	94.163	3.96872	0.64	0.000645	143.715	0.017839
1215	85.518	pplu	1	0.638	-0.001192	94.337	4.05275	0.637	0.000643	143.828	0.018007
1216	85.572	pplu	1	0.637	-0.001207	94.671	4.13826	0.634	0.000641	144.019	0.018167
1217	85.626	pplu	1	0.637	-0.001222	95.063	4.22524	0.635	0.000639	143.969	0.018319
1218	85.68	pplu	1	0.638	-0.001238	95.312	4.3137	0.636	0.000637	143.951	0.018464
1219	85.734	pplu	1	0.639	-0.001253	95.403	4.40364	0.637	0.000635	143.974	0.018603
1220	85.788	pplu	1	0.638	-0.001268	95.3	4.49505	0.636	0.000632	143.963	0.018736
1221	85.842	pplu	1	0.637	-0.001284	95.324	4.58793	0.637	0.00063	144.09	0.018863
1222	85.896	pplu	1	0.635	-0.001299	95.83	4.6823	0.637	0.000628	144.026	0.018986
1223	85.95	pplu	1	0.637	-0.001314	96.195	4.77814	0.636	0.000626	143.89	0.019105
1224	86.004	pplu	1	0.636	-0.001329	96.655	4.87546	0.638	0.000623	143.903	0.019221
1225	86.058	pplu	1	0.635	-0.001345	96.816	4.97428	0.635	0.000621	143.837	0.019334
1226	86.111	pplu	1	0.636	-0.00136	96.994	5.07459	0.637	0.000619	143.991	0.019447
1227	86.165	pplu	1	0.635	-0.001375	97.294	5.17642	0.636	0.000617	143.894	0.01956
1228	86.219	pplu	1	0.637	-0.00139	97.762	5.27978	0.639	0.000615	143.719	0.019674
1229	86.273	pplu	1	0.635	-0.001405	98.238	5.38469	0.638	0.000612	143.99	0.01979
1230	86.327	pplu	1	0.632	-0.00142	98.318	5.49116	0.637	0.00061	143.855	0.019908
1231	86.381	pplu	1	0.638	-0.001435	98.547	5.59922	0.641	0.000608	144.062	0.020029
1232	86.435	pplu	1	0.637	-0.00145	98.605	5.70887	0.641	0.000606	144.229	0.020155
1233	86.489	pplu	1	0.636	-0.001465	99.058	5.82014	0.642	0.000604	143.989	0.020284
1234	86.543	pplu	1	0.636	-0.00148	99.57	5.93303	0.642	0.000602	144.084	0.020418
1235	86.597	pplu	1	0.637	-0.001495	99.449	6.04756	0.636	0.000599	144.069	0.020556
1236	86.651	pplu	1	0.636	-0.00151	100.225	6.16374	0.637	0.000597	144.061	0.020699
1237	86.705	pplu	1	0.636	-0.001525	100.4	6.28156	0.64	0.000595	143.994	0.020846
1238	86.759	pplu	1	0.637	-0.00154	100.595	6.40102	0.637	0.000593	143.634	0.020998
1239	86.812	pplu	1	0.636	-0.001555	101.138	6.52212	0.634	0.000591	143.996	0.021154
1240	86.866	pplu	1	0.636	-0.00157	101.171	6.64484	0.636	0.000589	144.161	0.021315
1241	86.92	pplu	1	0.633	-0.001584	101.519	6.76919	0.643	0.000586	144.081	0.021479
1242	86.974	pplu	1	0.637	-0.001599	102	6.89513	0.638	0.000584	144.242	0.021648
1243	87.028	pplu	1	0.635	-0.001614	102.338	7.02267	0.636	0.000582	143.95	0.02182
1244	87.082	pplu	1	0.632	-0.001629	102.636	7.15178	0.641	0.00058	144.236	0.021996
1245	87.136	pplu	1	0.634	-0.001643	102.864	7.28243	0.637	0.000578	144.136	0.022177
1246	87.19	pplu	1	0.634	-0.001658	103.141	7.4146	0.638	0.000575	144.024	0.022361
1247	87.244	pplu	1	0.63	-0.001672	103.49	7.54824	0.636	0.000573	144.321	0.02255
1248	87.298	pplu	1	0.636	-0.001687	103.713	7.68332	0.639	0.000571	144.359	0.022744
1249	87.352	pplu	1	0.637	-0.001702	104.363	7.81978	0.638	0.000568	144.245	0.022945
1250	87.406	pplu	1	0.636	-0.001716	105.003	7.95755	0.637	0.000566	144.194	0.023153
1251	87.46	pplu	1	0.632	-0.00173	105.174	8.09657	0.637	0.000564	144.272	0.023369
1252	87.513	pplu	1	0.633	-0.001745	105.764	8.23673	0.636	0.000561	144.205	0.023595
1253	87.567	pplu	1	0.633	-0.001759	106.065	8.37795	0.635	0.000559	144.09	0.023831
1254	87.621	pplu	1	0.633	-0.001774	106.458	8.52011	0.636	0.000557	143.977	0.024079
1255	87.675	pplu	1	0.632	-0.001788	106.996	8.66309	0.636	0.000554	144.178	0.024339
1256	87.729	pplu	1	0.637	-0.001802	107.511	8.80674	0.639	0.000552	144.293	0.024612
1257	87.783	pplu	1	0.635	-0.001816	107.835	8.95093	0.642	0.00055	144.144	0.0249
1258	87.837	pplu	1	0.635	-0.00183	108.626	9.09548	0.64	0.000547	143.897	0.025203
1259	87.891	pplu	1	0.633	-0.001844	109.139	9.24023	0.639	0.000545	143.632	0.025521
1260	87.945	pplu	1	0.63	-0.001858	109.354	9.385	0.638	0.000542	143.781	0.025856
1261	87.999	pplu	1	0.63	-0.001872	109.998	9.52961	0.639	0.00054	143.822	0.026208
1262	88.053	pplu	1	0.63	-0.001886	110.427	9.67388	0.64	0.000538	143.877	0.026577
1263	88.107	pplu	1	0.631	-0.0019	110.863	9.81764	0.639	0.000535	143.895	0.026963
1264	88.161	pplu	1	0.633	-0.001914	111.351	9.96068	0.636	0.000533	143.915	0.027367
1265	88.214	pplu	1	0.63	-0.001928	111.966	10.1028	0.635	0.000531	143.981	0.02779
1266	88.268	pplu	1	0.63	-0.001941	112.235	10.244	0.638	0.000529	143.99	0.02823
1267	88.322	pplu	1	0.632	-0.001955	112.981	10.3838	0.639	0.000527	143.855	0.028689
1268	88.376	pplu	1	0.634	-0.001969	113.879	10.5223	0.636	0.000525	143.772	0.029165
1269	88.43	pplu	1	0.633	-0.001982	114.375	10.6593	0.637	0.000523	143.88	0.02966
1270	88.484	pplu	1	0.631	-0.001995	114.721	10.7945	0.638	0.000521	143.957	0.030172
1271	88.538	pplu	1	0.631	-0.002009	115.212	10.9279	0.638	0.000519	144.066	0.030701
1272	88.592	pplu	1	0.633	-0.002022	115.908	11.0593	0.638	0.000518	144.12	0.031246
1273	88.646	pplu	1	0.63	-0.002035	116.386	11.1886	0.637	0.000516	144.139	0.031806
1274	88.7	pplu	1	0.63	-0.002048	117.142	11.3157	0.638	0.000515	143.821	0.032381
1275	88.754	pplu	1	0.631	-0.002061	117.744	11.4404	0.64	0.000513	143.689	0.03297
1276	88.808	pplu	1	0.63	-0.002074	118.221	11.5626	0.639	0.000512	143.957	0.03357
1277	88.862	pplu	1	0.629	-0.002087	118.822	11.6821	0.639	0.00051	143.92	0.034181
1278	88.916	pplu	1	0.63	-0.002099	119.61	11.799	0.639	0.000509	143.742	0.034802
1279	88.969	pplu	1	0.631	-0.002111	120.386	11.9131	0.638	0.000508	143.781	0.035429
1280	89.023	pplu	1	0.63	-0.002124	120.96	12.0242	0.64	0.000507	143.974	0.036063
1281	89.077	pplu	1	0.629	-0.002136	121.57	12.1322	0.638	0.000506	144.054	0.036701
1282	89.131	pplu	1	0.63	-0.002148	122.365	12.237	0.639	0.000505	144.095	0.037341
1283	89.185	pplu	1	0.63	-0.00216	123.151	12.3386	0.637	0.000504	143.839	0.037981
1284	89.239	pplu	1	0.629	-0.002172	123.96	12.4368	0.638	0.000504	144.06	0.038621
1285	89.293	pplu	1	0.627	-0.002183	124.749	12.5315	0.636	0.000503	144.193	0.039258
1286	89.347	pplu	1	0.625	-0.002194	125.401	12.6227	0.639	0.000502	143.951	0.039891
1287	89.401	pplu	1	0.625	-0.002206	126.07	12.7102	0.633	0.000502	144.038	0.040518
1288	89.455	pplu	1	0.626	-0.002216	126.721	12.7939	0.639	0.000501	144.244	0.041139
1289	89.509	pplu	1	0.625	-0.002227	127.43	12.8738	0.638	0.000501	143.894	0.04175
1290	89.563	pplu	1	0.626	-0.002238	128.382	12.9497	0.639	0.0005	143.928	0.042353
1291	89.617	pplu	1	0.627	-0.002248	129.466	13.0217	0.638	0.0005	144.036	0.042944
1292	89.67	pplu	1	0.627	-0.002258	130.252	13.0895	0.639	0.0005	144.07	0.043524
1293	89.724	pplu	1	0.627	-0.002268	130.921	13.1532	0.642	0.0005	144.001	0.044092
1294	89.778	pplu	1	0.626	-0.002278	131.576	13.2126	0.639	0.0005	143.985	0.044645
1295	89.832	pplu	1	0.629	-0.002287	132.328	13.2676	0.639	0.0005	143.906	0.045185
1296	89.886	pplu	1	0.626	-0.002297	133.166	13.318	0.639	0.0005	144.124	0.045709
1297	89.94	pplu	1	0.626	-0.002306	134.379	13.3639	0.64	0.0005	144.281	0.046218
1298	89.994	pplu	1	0.626	-0.002314	135.181	13.4049	0.635	0.0005	143.948	0.046711
1299	90.048	pplu	1	0.625	-0.002323	135.756	13.441	0.641	0.000501	143.971	0.047188
1300	90.102	pplu	1	0.627	-0.002331	136.465	13.4719	0.64	0.000501	144.001	0.047649
1301	90.156	pplu	1	0.624	-0.002339	137.551	13.4975	0.638	0.000502	143.83	0.048095
1302	90.21	pplu	1	0.622	-0.002346	138.428	13.5175	0.638	0.000502	144.007	0.048525
1303	90.264	pplu	1	0.62	-0.002354	139.489	13.5316	0.636	0.000503	144.091	0.04894
1304	90.318	pplu	1	0.624	-0.002361	140.515	13.5396	0.639	0.000504	144.223	0.04934
1305	90.371	pplu	1	0.623	-0.002367	141.392	13.5411	0.643	0.000504	144.158	0.049727
1306	90.425	pplu	1	0.621	-0.002374	142.236	13.5359	0.638	0.000505	144.15	0.050102
1307	90.479	pplu	1	0.621	-0.00238	142.757	13.5237	0.637	0.000506	144.11	0.050465
1308	90.533	pplu	1	0.623	-0.002386	143.575	13.5041	0.638	0.000507	144.226	0.050817
1309	90.587	pplu	1	0.622	-0.002391	144.41	13.4768	0.641	0.000508	144.041	0.051161
1310	90.641	pplu	1	0.624	-0.002397	145.089	13.4415	0.639	0.000509	144.203	0.051497
1311	90.695	pplu	1	0.623	-0.002401	146.164	13.3979	0.637	0.000511	144.245	0.051827
1312	90.749	pplu	1	0.62	-0.002406	146.859	13.3458	0.642	0.000512	144.319	0.052151
1313	90.803	pplu	1	0.621	-0.00241	147.963	13.2848	0.641	0.000513	144.389	0.052473
1314	90.857	pplu	1	0.621	-0.002414	148.65	13.2149	0.64	0.000515	144.297	0.052794
1315	90.911	pplu	1	0.625	-0.002418	149.037	13.1358	0.641	0.000516	144.11	0.053114
1316	90.965	pplu	1	0.623	-0.002421	149.687	13.0474	0.642	0.000518	144.041	0.053437
1317	91.019	pplu	1	0.623	-0.002424	150.645	12.9496	0.637	0.000519	144.194	0.053763
1318	91.072	pplu	1	0.623	-0.002427	151.359	12.8424	0.636	0.000521	144.123	0.054094
1319	91.126	pplu	1	0.624	-0.002429	152.159	12.7258	0.637	0.000522	144.443	0.054431
1320	91.18	pplu	1	0.623	-0.002431	152.989	12.5998	0.639	0.000524	144.243	0.054776
1321	91.234	pplu	1	0.624	-0.002432	153.783	12.4646	0.641	0.000525	144.325	0.05513
1322	91.288	pplu	1	0.626	-0.002434	154.255	12.3202	0.642	0.000527	144.46	0.055495
1323	91.342	pplu	1	0.621	-0.002435	155.393	12.1669	0.64	0.000529	144.475	0.055871
1324	91.396	pplu	1	0.621	-0.002435	155.759	12.0049	0.639	0.00053	144.304	0.05626
1325	91.45	pplu	1	0.624	-0.002435	156.482	11.8344	0.641	0.000532	144.113	0.056663
1326	91.504	pplu	1	0.624	-0.002435	157.17	11.6557	0.64	0.000533	144.622	0.05708
1327	91.558	pplu	1	0.621	-0.002435	158.201	11.4693	0.639	0.000534	144.533	0.057512
1328	91.612	pplu	1	0.621	-0.002434	158.706	11.2753	0.64	0.000536	144.191	0.05796
1329	91.666	pplu	1	0.624	-0.002433	159.796	11.0742	0.64	0.000537	144.133	0.058425
1330	91.72	pplu	1	0.624	-0.002431	160.091	10.8663	0.64	0.000538	144.144	0.058907
1331	91.774	pplu	1	0.623	-0.002429	160.69	10.6521	0.642	0.00054	144.191	0.059406
1332	91.827	pplu	1	0.624	-0.002427	161.445	10.4321	0.644	0.000541	144.293	0.059922
1333	91.881	pplu	1	0.626	-0.002424	162.05	10.2065	0.642	0.000542	144.29	0.060455
1334	91.935	pplu	1	0.624	-0.002421	162.801	9.97592	0.64	0.000542	144.261	0.061005
1335	91.989	pplu	1	0.621	-0.002418	163.453	9.7407	0.64	0.000543	144.187	0.061571
1336	92.043	pplu	1	0.62	-0.002414	164.008	9.50127	0.639	0.000544	143.954	0.062153
1337	92.097	pplu	1	0.622	-0.00241	165.056	9.25808	0.638	0.000544	143.853	0.062749
1338	92.151	pplu	1	0.619	-0.002406	165.622	9.01155	0.64	0.000545	143.981	0.063359
1339	92.205	pplu	1	0.623	-0.002401	166.383	8.76207	0.64	0.000545	144.038	0.063982
1340	92.259	pplu	1	0.622	-0.002396	166.868	8.51004	0.64	0.000545	144.248	0.064616
1341	92.313	pplu	1	0.617	-0.00239	167.185	8.25585	0.642	0.000545	144.253	0.065261
1342	92.367	pplu	1	0.618	-0.002384	167.96	7.99986	0.644	0.000545	144.039	0.065915
1343	92.421	pplu	1	0.618	-0.002378	168.54	7.74243	0.639	0.000545	144.072	0.066577
1344	92.475	pplu	1	0.619	-0.002371	169.303	7.48389	0.638	0.000545	144.126	0.067246
1345	92.528	pplu	1	0.621	-0.002364	169.922	7.22456	0.641	0.000545	143.976	0.067922
1346	92.582	pplu	1	0.624	-0.002357	170.545	6.96475	0.639	0.000544	143.999	0.068603
1347	92.636	pplu	1	0.624	-0.002349	170.938	6.70474	0.641	0.000544	144.183	0.069288
1348	92.69	pplu	1	0.621	-0.002341	171.397	6.44479	0.643	0.000543	144.238	0.069978
1349	92.744	pplu	1	0.621	-0.002332	171.876	6.18514	0.641	0.000542	144.217	0.070671
1350	92.798	pplu	1	0.62	-0.002323	172.202	5.92601	0.641	0.000541	144.308	0.071367
1351	92.852	pplu	1	0.619	-0.002314	172.812	5.66761	0.639	0.00054	144.149	0.072066
1352	92.906	pplu	1	0.62	-0.002304	173.477	5.41009	0.64	0.000539	144.238	0.072766
1353	92.96	pplu	1	0.621	-0.002294	173.795	5.15361	0.636	0.000538	144.02	0.073469
1354	93.014	pplu	1	0.619	-0.002284	174.117	4.89832	0.642	0.000537	143.986	0.074173
1355	93.068	pplu	1	0.618	-0.002273	174.544	4.64431	0.643	0.000536	144.113	0.074877
1356	93.122	pplu	1	0.619	-0.002262	174.538	4.3917	0.642	0.000535	144.248	0.075582
1357	93.176	pplu	1	0.62	-0.00225	174.572	4.14058	0.641	0.000534	144.245	0.076288
1358	93.229	pplu	1	0.621	-0.002238	174.764	3.89105	0.639	0.000533	144.512	0.076993
1359	93.283	pplu	1	0.621	-0.002226	174.566	3.6432	0.642	0.000531	144.271	0.077697
1360	93.337	pplu	1	0.618	-0.002214	174.579	3.39711	0.637	0.00053	143.946	0.078401
1361	93.391	pplu	1	0.617	-0.002201	174.444	3.15288	0.642	0.000529	144.372	0.079102
1362	93.445	pplu	1	0.618	-0.002188	174.558	2.91062	0.643	0.000527	144.342	0.079802
1363	93.499	pplu	1	0.616	-0.002174	174.636	2.67044	0.641	0.000526	144.272	0.080499
1364	93.553	pplu	1	0.618	-0.002161	174.504	2.43247	0.639	0.000525	144.252	0.081193
1365	93.607	pplu	1	0.617	-0.002146	174.291	2.19686	0.641	0.000523	144.558	0.081883
1366	93.661	pplu	1	0.62	-0.002132	174.078	1.96377	0.64	0.000522	144.3	0.08257
1367	93.715	pplu	1	0.621	-0.002117	173.916	1.73337	0.643	0.00052	144.083	0.083252
1368	93.769	pplu	1	0.618	-0.002102	173.444	1.50586	0.643	0.000519	144.147	0.083929
1369	93.823	pplu	1	0.621	-0.002087	173.611	1.28148	0.64	0.000517	144.171	0.084601
1370	93.877	pplu	1	0.617	-0.002071	173.333	1.06043	0.637	0.000516	144.512	0.085267
1371	93.93	pplu	1	0.619	-0.002055	172.947	0.842953	0.641	0.000514	144.073	0.085927
1372	93.984	pplu	1	0.614	-0.002039	172.901	0.629311	0.64	0.000512	144.237	0.086581
1373	94.038	pplu	1	0.617	-0.002022	172.852	0.419756	0.638	0.000511	144.234	0.087227
1374	94.092	pplu	1	0.618	-0.002005	172.536	0.214552	0.642	0.000509	144.259	0.087865
1375	94.146	pplu	1	0.618	-0.001988	172.354	0.013962	0.645	0.000507	144.39	0.088495
1376	94.2	pplu	1	0.614	-0.001971	172.406	-0.181745	0.641	0.000505	144.485	0.089116
1377	94.254	pplu	1	0.615	-0.001953	172.065	-0.372301	0.643	0.000504	144.224	0.089728
1378	94.308	pplu	1	0.615	-0.001935	171.913	-0.557446	0.639	0.000502	144.194	0.090329
1379	94.362	pplu	1	0.617	-0.001916	171.792	-0.736927	0.645	0.0005	144.498	0.090921
1380	94.416	pplu	1	0.615	-0.001898	171.505	-0.910469	0.639	0.000498	144.369	0.091503
1381	94.47	pplu	1	0.614	-0.001879	171.249	-1.07786	0.64	0.000496	144.358	0.092075
1382	94.524	pplu	1	0.612	-0.00186	171.414	-1.23886	0.641	0.000494	144.468	0.092638
1383	94.578	pplu	1	0.618	-0.001841	171.07	-1.39326	0.644	0.000492	144.4	0.093193
1384	94.632	pplu	1	0.616	-0.001821	170.635	-1.54087	0.643	0.00049	144.537	0.093739
1385	94.685	pplu	1	0.616	-0.001801	170.701	-1.6815	0.642	0.000487	144.384	0.094278
1386	94.739	pplu	1	0.615	-0.001781	170.795	-1.81501	0.643	0.000485	144.5	0.09481
1387	94.793	pplu	1	0.616	-0.00176	170.49	-1.94126	0.642	0.000483	144.372	0.095336
1388	94.847	pplu	1	0.614	-0.00174	170.229	-2.06014	0.642	0.000481	144.56	0.095857
1389	94.901	pplu	1	0.612	-0.001719	169.786	-2.17157	0.643	0.000479	144.495	0.096373
1390	94.955	pplu	1	0.611	-0.001698	169.857	-2.27551	0.641	0.000476	144.465	0.096885
1391	95.009	pplu	1	0.614	-0.001676	169.764	-2.37191	0.64	0.000474	144.316	0.097393
1392	95.063	pplu	1	0.615	-0.001655	169.61	-2.46081	0.644	0.000472	144.25	0.097899
1393	95.117	pplu	1	0.615	-0.001633	169.251	-2.54224	0.641	0.00047	144.542	0.098402
1394	95.171	pplu	1	0.613	-0.001611	168.97	-2.6163	0.639	0.000467	144.642	0.098902
1395	95.225	pplu	1	0.612	-0.001589	168.692	-2.68311	0.641	0.000465	144.649	0.099401
1396	95.279	pplu	1	0.609	-0.001566	168.495	-2.74282	0.643	0.000463	144.667	0.099899
1397	95.333	pplu	1	0.612	-0.001544	168.474	-2.79564	0.642	0.000461	144.565	0.100397
1398	95.386	pplu	1	0.611	-0.001521	168.494	-2.8418	0.64	0.000458	144.616	0.100896
1399	95.44	pplu	1	0.61	-0.001498	168.436	-2.88157	0.641	0.000456	144.572	0.101395
1400	95.494	pplu	1	0.61	-0.001475	167.991	-2.91522	0.641	0.000454	144.545	0.101897
1401	95.548	pplu	1	0.612	-0.001451	167.647	-2.94308	0.64	0.000452	144.647	0.102403
1402	95.602	pplu	1	0.613	-0.001428	167.439	-2.96548	0.64	0.00045	144.686	0.102912
1403	95.656	pplu	1	0.612	-0.001404	167.211	-2.98278	0.641	0.000448	144.686	0.103427
1404	95.71	pplu	1	0.611	-0.00138	167.093	-2.99536	0.644	0.000446	144.699	0.10395
1405	95.764	pplu	1	0.611	-0.001356	167.094	-3.00358	0.646	0.000444	144.543	0.10448
1406	95.818	pplu	1	0.609	-0.001331	167.035	-3.00783	0.647	0.000442	144.371	0.10502
1407	95.872	pplu	1	0.609	-0.001307	166.695	-3.00849	0.645	0.00044	144.569	0.105571
1408	95.926	pplu	1	0.61	-0.001282	166.366	-3.00592	0.642	0.000438	144.824	0.106135
1409	95.98	pplu	1	0.609	-0.001258	166.291	-3.00047	0.641	0.000436	144.708	0.106712
1410	96.034	pplu	1	0.608	-0.001233	166.07	-2.99247	0.641	0.000434	144.778	0.107304
1411	96.087	pplu	1	0.609	-0.001208	165.816	-2.98221	0.642	0.000432	144.733	0.107913
1412	96.141	pplu	1	0.608	-0.001183	165.644	-2.97	0.641	0.00043	144.555	0.108538
1413	96.195	pplu	1	0.609	-0.001157	165.42	-2.95608	0.642	0.000428	144.575	0.109181
1414	96.249	pplu	1	0.61	-0.001132	165.309	-2.94069	0.644	0.000426	144.588	0.109843
1415	96.303	pplu	1	0.609	-0.001106	165.129	-2.92402	0.642	0.000424	144.508	0.110524
1416	96.357	pplu	1	0.606	-0.001081	164.781	-2.90625	0.642	0.000422	144.546	0.111223
1417	96.411	pplu	1	0.607	-0.001055	164.631	-2.88753	0.644	0.00042	144.426	0.111943
1418	96.465	pplu	1	0.61	-0.001029	164.498	-2.86797	0.642	0.000418	144.373	0.112682
1419	96.519	pplu	1	0.609	-0.001003	164.422	-2.84765	0.644	0.000416	144.402	0.113442
1420	96.573	pplu	1	0.609	-0.000977	164.293	-2.82664	0.642	0.000414	144.248	0.114223
1421	96.627	pplu	1	0.608	-0.000951	164.024	-2.80499	0.645	0.000412	144.354	0.115024
1422	96.681	pplu	1	0.607	-0.000924	163.96	-2.78273	0.643	0.00041	144.424	0.115846
1423	96.735	pplu	1	0.608	-0.000898	163.817	-2.75987	0.643	0.000408	144.539	0.11669
1424	96.788	pplu	1	0.606	-0.000871	163.668	-2.73644	0.642	0.000406	144.653	0.117555
1425	96.842	pplu	1	0.606	-0.000844	163.553	-2.71243	0.642	0.000404	144.738	0.118441
1426	96.896	pplu	1	0.606	-0.000817	163.236	-2.68783	0.645	0.000401	144.842	0.119349
1427	96.95	pplu	1	0.61	-0.00079	162.914	-2.66263	0.645	0.000399	144.428	0.120278
1428	97.004	pplu	1	0.612	-0.000763	162.992	-2.63684	0.643	0.000396	144.353	0.121228
1429	97.058	pplu	1	0.606	-0.000736	162.99	-2.61043	0.643	0.000394	144.675	0.122199
1430	97.112	pplu	1	0.607	-0.000709	162.591	-2.5834	0.64	0.000391	144.547	0.12319
1431	97.166	pplu	1	0.607	-0.000682	162.656	-2.55577	0.64	0.000389	144.325	0.124201
1432	97.22	pplu	1	0.606	-0.000654	162.581	-2.52752	0.642	0.000386	144.733	0.125231
1433	97.274	pplu	1	0.607	-0.000626	162.551	-2.49867	0.639	0.000383	144.641	0.126279
1434	97.328	pplu	1	0.607	-0.000599	162.348	-2.46925	0.643	0.00038	144.472	0.127346
1435	97.382	pplu	1	0.604	-0.000571	162.316	-2.43928	0.642	0.000377	144.462	0.128428
1436	97.436	pplu	1	0.607	-0.000543	162.018	-2.40881	0.641	0.000374	144.484	0.129527
1437	97.49	pplu	1	0.606	-0.000515	161.757	-2.37786	0.643	0.000371	144.61	0.130639
1438	97.543	pplu	1	0.607	-0.000487	161.724	-2.3465	0.645	0.000368	144.749	0.131766
1439	97.597	pplu	1	0.604	-0.000459	161.558	-2.31478	0.641	0.000365	144.483	0.132904
1440	97.651	pplu	1	0.605	-0.000431	161.583	-2.28277	0.641	0.000362	144.611	0.134052
1441	97.705	pplu	1	0.608	-0.000402	161.381	-2.25054	0.641	0.000359	144.79	0.135211
1442	97.759	pplu	1	0.609	-0.000374	161.124	-2.21816	0.64	0.000355	144.485	0.136377
1443	97.813	pplu	1	0.604	-0.000345	161.483	-2.18569	0.643	0.000352	144.667	0.13755
1444	97.867	pplu	1	0.603	-0.000316	161.489	-2.15321	0.643	0.000349	144.972	0.138729
1445	97.921	pplu	1	0.604	-0.000288	160.932	-2.12078	0.642	0.000345	144.74	0.139913
1446	97.975	pplu	1	0.604	-0.000259	160.647	-2.08849	0.643	0.000342	144.587	0.141102
1447	98.029	pplu	1	0.61	-0.00023	160.85	-2.05638	0.642	0.000339	144.65	0.142294
1448	98.083	pplu	1	0.608	-0.000201	160.819	-2.02452	0.644	0.000335	144.838	0.143488
1449	98.137	pplu	1	0.609	-0.000172	160.773	-1.99298	0.642	0.000332	144.946	0.144684
1450	98.191	pplu	1	0.609	-0.000143	160.772	-1.96181	0.643	0.000328	145.036	0.145881
1451	98.244	pplu	1	0.606	-0.000113	160.717	-1.93106	0.645	0.000324	144.926	0.147078
1452	98.298	pplu	1	0.605	-8.4e-05	160.419	-1.90078	0.643	0.000321	144.696	0.148275
1453	98.352	pplu	1	0.605	-5.5e-05	160.339	-1.87101	0.645	0.000317	144.683	0.149471
1454	98.406	pplu	1	0.606	-2.5e-05	160.198	-1.84177	0.643	0.000314	144.768	0.150665
1455	98.46	pplu	1	0.605	5e-06	159.767	-1.81308	0.644	0.00031	144.896	0.151857
1456	98.514	pplu	1	0.605	3.4e-05	159.845	-1.78497	0.645	0.000307	144.846	0.153047
1457	98.568	pplu	1	0.609	6.4e-05	159.67	-1.75747	0.642	0.000303	144.854	0.154234
1458	98.622	pplu	1	0.611	9.4e-05	159.526	-1.73059	0.643	0.000299	144.828	0.155418
1459	98.676	pplu	1	0.609	0.000124	159.509	-1.70434	0.645	0.000296	144.802	0.156599
1460	98.73	pplu	1	0.607	0.000153	159.532	-1.67874	0.644	0.000292	144.828	0.157777
1461	98.784	pplu	1	0.605	0.000183	159.222	-1.65379	0.645	0.000288	144.948	0.158952
1462	98.838	pplu	1	0.607	0.000214	159.49	-1.6295	0.647	0.000284	144.95	0.160124
1463	98.892	pplu	1	0.605	0.000244	159.343	-1.60586	0.646	0.000281	144.98	0.161293
1464	98.945	pplu	1	0.609	0.000274	159.24	-1.58286	0.644	0.000277	145.024	0.16246
1465	98.999	pplu	1	0.605	0.000304	159.015	-1.56049	0.644	0.000273	144.904	0.163623
1466	99.053	pplu	1	0.607	0.000334	158.898	-1.53874	0.642	0.000269	144.967	0.164783
1467	99.107	pplu	1	0.609	0.000365	158.688	-1.5176	0.642	0.000265	145.011	0.16594
1468	99.161	pplu	1	0.608	0.000395	158.539	-1.49704	0.643	0.000261	144.993	0.167094
1469	99.215	pplu	1	0.61	0.000425	158.915	-1.47706	0.643	0.000257	144.942	0.168245
1470	99.269	pplu	1	0.607	0.000456	158.718	-1.45763	0.644	0.000253	144.914	0.169393
1471	99.323	pplu	1	0.607	0.000486	158.747	-1.43874	0.645	0.000249	145.032	0.170537
1472	99.377	pplu	1	0.605	0.000517	158.655	-1.42036	0.645	0.000245	145.089	0.171678
1473	99.431	pplu	1	0.607	0.000547	158.29	-1.40246	0.645	0.000241	145.014	0.172816
1474	99.485	pplu	1	0.609	0.000578	157.906	-1.38502	0.645	0.000237	144.927	0.173951
1475	99.539	pplu	1	0.606	0.000609	158.336	-1.36803	0.643	0.000233	145.048	0.175084
1476	99.593	pplu	1	0.607	0.000639	158.347	-1.35147	0.641	0.000229	145.184	0.176216
1477	99.646	pplu	1	0.606	0.00067	158.359	-1.33531	0.642	0.000224	145.276	0.177347
1478	99.7	pplu	1	0.608	0.0007	158.383	-1.31955	0.643	0.00022	145.471	0.178478
1479	99.754	pplu	1	0.608	0.000731	157.983	-1.30416	0.643	0.000216	145.174	0.179611
1480	99.808	pplu	1	0.607	0.000761	157.955	-1.28914	0.643	0.000212	145.149	0.180746
1481	99.862	pplu	1	0.608	0.000792	157.954	-1.27448	0.644	0.000208	145.535	0.181885
1482	99.916	pplu	1	0.607	0.000822	157.849	-1.26015	0.644	0.000204	145.48	0.183028
1483	99.97	pplu	1	0.607	0.000853	157.816	-1.24617	0.643	0.0002	145.1	0.184177
1484	100.024	pplu	1	0.609	0.000883	158.115	-1.23253	0.643	0.000195	145.111	0.185332
1485	100.078	pplu	1	0.609	0.000914	158.009	-1.21922	0.641	0.000191	145.28	0.186494
1486	100.132	pplu	1	0.608	0.000944	157.999	-1.20624	0.642	0.000187	145.043	0.187662
1487	100.186	pplu	1	0.608	0.000974	157.816	-1.1936	0.644	0.000184	145.133	0.188838
1488	100.24	pplu	1	0.608	0.001004	157.669	-1.18128	0.646	0.00018	145.152	0.190021
1489	100.294	pplu	1	0.608	0.001034	157.744	-1.16929	0.645	0.000176	145.233	0.191211
1490	100.348	pplu	1	0.609	0.001064	157.635	-1.15762	0.642	0.000172	145.017	0.192408
1491	100.401	pplu	1	0.608	0.001094	157.745	-1.14625	0.644	0.000169	144.797	0.193611
1492	100.455	pplu	1	0.608	0.001123	157.77	-1.13519	0.644	0.000165	144.919	0.194819
1493	100.509	pplu	1	0.61	0.001153	157.477	-1.12444	0.647	0.000161	144.986	0.196032
1494	100.563	pplu	1	0.611	0.001182	157.441	-1.11397	0.645	0.000158	145.1	0.197249
1495	100.617	pplu	1	0.61	0.001211	157.368	-1.10381	0.64	0.000155	145.194	0.198469
1496	100.671	pplu	1	0.608	0.00124	157.17	-1.09394	0.641	0.000151	145.362	0.199689
1497	100.725	pplu	1	0.61	0.001268	157.218	-1.08437	0.644	0.000148	145.465	0.20091
1498	100.779	pplu	1	0.611	0.001297	157.371	-1.07509	0.644	0.000145	145.186	0.20213
1499	100.833	pplu	1	0.609	0.001325	157.226	-1.06611	0.643	0.000142	144.899	0.203347
1500	100.887	pplu	1	0.608	0.001352	156.925	-1.05742	0.645	0.000139	145.089	0.20456
1501	100.941	pplu	1	0.607	0.00138	156.785	-1.04903	0.645	0.000136	145.321	0.205769
1502	100.995	pplu	1	0.606	0.001407	156.718	-1.04095	0.647	0.000133	144.909	0.206972
1503	101.049	pplu	1	0.607	0.001434	156.692	-1.03318	0.642	0.00013	145.182	0.208167
1504	101.102	pplu	1	0.61	0.00146	156.557	-1.02575	0.644	0.000128	145.224	0.209354
1505	101.156	pplu	1	0.611	0.001487	156.689	-1.01865	0.646	0.000125	145.117	0.210531
1506	101.21	pplu	1	0.609	0.001512	156.836	-1.01189	0.646	0.000122	145.016	0.211699
1507	101.264	pplu	1	0.609	0.001538	156.837	-1.00546	0.642	0.00012	145.068	0.212854
1508	101.318	pplu	1	0.609	0.001563	156.608	-0.999349	0.643	0.000117	145.262	0.213997
1509	101.372	pplu	1	0.61	0.001587	156.551	-0.993547	0.646	0.000115	145.339	0.215126
1510	101.426	pplu	1	0.612	0.001612	156.409	-0.988031	0.645	0.000113	145.028	0.216241
1511	101.48	pplu	1	0.614	0.001635	156.298	-0.982781	0.647	0.00011	145.135	0.217339
1512	101.534	pplu	1	0.616	0.001659	156.224	-0.977777	0.642	0.000108	145.279	0.218421
1513	101.588	pplu	1	0.614	0.001682	156.33	-0.972997	0.643	0.000106	145.229	0.219485
1514	101.642	pplu	1	0.609	0.001704	156.355	-0.968419	0.645	0.000104	145.397	0.22053
1515	101.696	pplu	1	0.608	0.001726	156.538	-0.964019	0.647	0.000102	145.312	0.221556
1516	101.75	pplu	1	0.612	0.001748	156.34	-0.959769	0.641	0.0001	145.525	0.222563
1517	101.803	pplu	1	0.609	0.001769	156.129	-0.955639	0.642	9.8e-05	145.482	0.22355
1518	101.857	pplu	1	0.613	0.001789	156.118	-0.951597	0.643	9.6e-05	145.468	0.224516
1519	101.911	pplu	1	0.615	0.00181	156.021	-0.947618	0.638	9.4e-05	145.551	0.225463
1520	101.965	pplu	1	0.613	0.001829	155.888	-0.943675	0.641	9.2e-05	145.641	0.22639
1521	102.019	pplu	1	0.611	0.001849	155.79	-0.939747	0.644	9.1e-05	145.578	0.227297
1522	102.073	pplu	1	0.614	0.001867	155.803	-0.935813	0.646	8.9e-05	145.569	0.228185
1523	102.127	pplu	1	0.613	0.001886	155.844	-0.931852	0.647	8.7e-05	145.674	0.229055
1524	102.181	pplu	1	0.613	0.001904	155.756	-0.927842	0.647	8.5e-05	145.77	0.229907
1525	102.235	pplu	1	0.614	0.001921	155.849	-0.923758	0.642	8.3e-05	145.623	0.230743
1526	102.289	pplu	1	0.613	0.001938	155.74	-0.919579	0.641	8.2e-05	145.568	0.231563
1527	102.343	pplu	1	0.616	0.001954	155.668	-0.915286	0.643	8e-05	145.925	0.232368
1528	102.397	pplu	1	0.613	0.00197	155.351	-0.910862	0.645	7.8e-05	145.75	0.23316
1529	102.451	pplu	1	0.613	0.001986	155.456	-0.906297	0.646	7.7e-05	145.33	0.233939
1530	102.504	pplu	1	0.614	0.002001	155.445	-0.901584	0.648	7.5e-05	145.5	0.234707
1531	102.558	pplu	1	0.616	0.002016	155.332	-0.896722	0.642	7.4e-05	145.919	0.235465
1532	102.612	pplu	1	0.614	0.00203	155.4	-0.891715	0.644	7.2e-05	145.652	0.236214
1533	102.666	pplu	1	0.612	0.002043	155.348	-0.886576	0.644	7.1e-05	145.619	0.236954
1534	102.72	pplu	1	0.619	0.002057	155.105	-0.88132	0.64	6.9e-05	145.652	0.237686
1535	102.774	pplu	1	0.615	0.00207	155.049	-0.875968	0.641	6.8e-05	145.812	0.238413
1536	102.828	pplu	1	0.616	0.002082	155.206	-0.870545	0.644	6.6e-05	146.006	0.239133
1537	102.882	pplu	1	0.617	0.002094	155.096	-0.865083	0.646	6.5e-05	145.811	0.239849
1538	102.936	pplu	1	0.613	0.002105	154.906	-0.859616	0.645	6.4e-05	145.717	0.24056
1539	102.99	pplu	1	0.613	0.002116	154.797	-0.85418	0.642	6.2e-05	145.878	0.241268
1540	103.044	pplu	1	0.615	0.002127	154.923	-0.848816	0.642	6.1e-05	145.774	0.241974
1541	103.098	pplu	1	0.616	0.002137	154.786	-0.84356	0.642	6e-05	145.742	0.242679
1542	103.152	pplu	1	0.618	0.002147	154.623	-0.838451	0.644	5.8e-05	145.781	0.243384
1543	103.206	pplu	1	0.616	0.002156	154.758	-0.833522	0.644	5.7e-05	145.71	0.244089
1544	103.259	pplu	1	0.617	0.002165	154.72	-0.828804	0.645	5.6e-05	145.909	0.244797
1545	103.313	pplu	1	0.619	0.002174	154.722	-0.824322	0.646	5.4e-05	145.931	0.24551
1546	103.367	pplu	1	0.62	0.002182	154.526	-0.820099	0.645	5.3e-05	145.842	0.246228
1547	103.421	pplu	1	0.618	0.00219	154.418	-0.816151	0.646	5.1e-05	145.88	0.246953
1548	103.475	pplu	1	0.619	0.002197	154.408	-0.812491	0.641	5e-05	145.78	0.247687
1549	103.529	pplu	1	0.618	0.002204	154.541	-0.809127	0.641	4.9e-05	145.902	0.248433
1550	103.583	pplu	1	0.619	0.00221	154.563	-0.806064	0.645	4.7e-05	145.941	0.249191
1551	103.637	pplu	1	0.618	0.002217	154.548	-0.803299	0.643	4.6e-05	145.748	0.249964
1552	103.691	pplu	1	0.615	0.002223	154.622	-0.800823	0.645	4.4e-05	145.818	0.250754
1553	103.745	pplu	1	0.618	0.002228	154.612	-0.798626	0.643	4.3e-05	146.153	0.251562
1554	103.799	pplu	1	0.621	0.002233	154.519	-0.796692	0.642	4.1e-05	146.073	0.252392
1555	103.853	pplu	1	0.62	0.002238	154.295	-0.795004	0.645	3.9e-05	146.39	0.253243
1556	103.907	pplu	1	0.62	0.002243	154.134	-0.793545	0.641	3.8e-05	146.037	0.25412
1557	103.96	pplu	1	0.617	0.002247	154.105	-0.792299	0.642	3.6e-05	145.991	0.255022
1558	104.014	pplu	1	0.617	0.002251	154.045	-0.791248	0.644	3.4e-05	146.273	0.255953
1559	104.068	pplu	1	0.617	0.002254	154.228	-0.79038	0.641	3.3e-05	146.391	0.256914
1560	104.122	pplu	1	0.616	0.002258	154.133	-0.789681	0.643	3.1e-05	146.142	0.257905
1561	104.176	pplu	1	0.617	0.002261	154.193	-0.789138	0.642	2.9e-05	146.089	0.25893
1562	104.23	pplu	1	0.617	0.002263	154.519	-0.788736	0.645	2.7e-05	146.06	0.259989
1563	104.284	pplu	1	0.621	0.002266	154.107	-0.788461	0.646	2.5e-05	146.197	0.261083
1564	104.338	pplu	1	0.619	0.002268	153.823	-0.788303	0.642	2.3e-05	146.291	0.262213
1565	104.392	pplu	1	0.619	0.00227	153.693	-0.788248	0.644	2.1e-05	146.188	0.263381
1566	104.446	pplu	1	0.621	0.002272	153.609	-0.788294	0.647	1.9e-05	146.114	0.264586
1567	104.5	pplu	1	0.619	0.002274	153.74	-0.788439	0.647	1.7e-05	146.004	0.265829
1568	104.554	pplu	1	0.624	0.002275	153.692	-0.788686	0.64	1.5e-05	146.017	0.267111
1569	104.608	pplu	1	0.621	0.002276	153.878	-0.789036	0.642	1.3e-05	146.109	0.268432
1570	104.661	pplu	1	0.62	0.002277	154.202	-0.789487	0.643	1e-05	145.786	0.269792
1571	104.715	pplu	1	0.622	0.002278	153.501	-0.790036	0.645	8e-06	145.907	0.271191
1572	104.769	pplu	1	0.622	0.002279	153.699	-0.79068	0.645	6e-06	146.232	0.272628
1573	104.823	pplu	1	0.623	0.00228	153.622	-0.791417	0.643	3e-06	146.315	0.274104
1574	104.877	pplu	1	0.625	0.00228	153.534	-0.792246	0.642	1e-06	146.117	0.275616
1575	104.931	pplu	1	0.623	0.002281	153.657	-0.79317	0.643	-1e-06	146.108	0.277166
1576	104.985	pplu	1	0.622	0.002281	153.546	-0.794192	0.644	-4e-06	146.101	0.278752
1577	105.039	pplu	1	0.623	0.002282	153.475	-0.795314	0.644	-6e-06	146.138	0.280374
1578	105.093	pplu	1	0.624	0.002282	153.286	-0.796539	0.646	-8e-06	146.356	0.282029
1579	105.147	pplu	1	0.623	0.002282	153.672	-0.797863	0.645	-1.1e-05	146.29	0.283719
1580	105.201	pplu	1	0.622	0.002282	153.621	-0.799281	0.644	-1.3e-05	146.312	0.28544
1581	105.255	pplu	1	0.619	0.002282	153.159	-0.800787	0.644	-1.5e-05	146.316	0.287194
1582	105.309	pplu	1	0.62	0.002282	153.099	-0.802372	0.643	-1.8e-05	146.145	0.288977
1583	105.362	pplu	1	0.628	0.002282	153.43	-0.804031	0.643	-2e-05	146.015	0.290789
1584	105.416	pplu	1	0.626	0.002282	153.399	-0.805756	0.644	-2.2e-05	145.935	0.292628
1585	105.47	pplu	1	0.622	0.002282	153.308	-0.807544	0.645	-2.5e-05	146.303	0.294493
1586	105.524	pplu	1	0.622	0.002282	153.369	-0.809386	0.645	-2.7e-05	146.273	0.296382
1587	105.578	pplu	1	0.624	0.002282	153.165	-0.811275	0.645	-2.9e-05	146.274	0.298293
1588	105.632	pplu	1	0.622	0.002282	153.182	-0.813197	0.647	-3.1e-05	146.242	0.300223
1589	105.686	pplu	1	0.625	0.002282	153.09	-0.815138	0.641	-3.4e-05	146.425	0.302171
1590	105.74	pplu	1	0.627	0.002282	153.01	-0.817078	0.643	-3.6e-05	146.568	0.304133
1591	105.794	pplu	1	0.625	0.002282	153.107	-0.818999	0.647	-3.8e-05	146.258	0.306109
1592	105.848	pplu	1	0.625	0.002282	152.957	-0.820883	0.645	-4e-05	146.25	0.308094
1593	105.902	pplu	1	0.623	0.002282	152.815	-0.822709	0.643	-4.2e-05	146.567	0.310086
1594	105.956	pplu	1	0.624	0.002282	152.795	-0.82446	0.642	-4.4e-05	146.518	0.312084
1595	106.01	pplu	1	0.627	0.002282	152.667	-0.826115	0.645	-4.6e-05	146.388	0.314084
1596	106.064	pplu	1	0.627	0.002282	152.548	-0.827654	0.643	-4.8e-05	146.398	0.316084
1597	106.117	pplu	1	0.625	0.002282	152.641	-0.829057	0.645	-5e-05	146.454	0.318083
1598	106.171	pplu	1	0.626	0.002282	152.611	-0.830307	0.646	-5.2e-05	146.503	0.320077
1599	106.225	pplu	1	0.627	0.002282	152.616	-0.831387	0.649	-5.4e-05	146.751	0.322066
1600	106.279	pplu	1	0.627	0.002282	152.522	-0.832289	0.645	-5.5e-05	146.408	0.324046
1601	106.333	pplu	1	0.628	0.002282	152.351	-0.833012	0.645	-5.7e-05	146.824	0.326017
1602	106.387	pplu	1	0.629	0.002282	152.345	-0.833563	0.642	-5.9e-05	146.948	0.327976
1603	106.441	pplu	1	0.63	0.002282	152.208	-0.833956	0.641	-6e-05	146.932	0.32992
1604	106.495	pplu	1	0.628	0.002282	152.046	-0.834211	0.643	-6.2e-05	146.77	0.331849
1605	106.549	pplu	1	0.626	0.002282	152.151	-0.834349	0.641	-6.4e-05	146.859	0.33376
1606	106.603	pplu	1	0.627	0.002282	152.133	-0.834399	0.643	-6.5e-05	146.909	0.335651
1607	106.657	pplu	1	0.627	0.002282	151.98	-0.834387	0.646	-6.7e-05	146.714	0.33752
1608	106.711	pplu	1	0.627	0.002282	152.041	-0.834336	0.643	-6.8e-05	146.66	0.339366
1609	106.765	pplu	1	0.627	0.002282	152.102	-0.834273	0.644	-6.9e-05	146.806	0.341186
1610	106.818	pplu	1	0.631	0.002282	151.869	-0.834222	0.643	-7.1e-05	146.749	0.342979
1611	106.872	pplu	1	0.632	0.002282	151.658	-0.834206	0.645	-7.2e-05	146.557	0.344744
1612	106.926	pplu	1	0.629	0.002282	151.53	-0.834122	0.646	-7.3e-05	146.795	0.3464
1613	106.98	pplu	1	0.629	0.002282	151.625	-0.832524	0.645	-7.3e-05	146.811	0.347651
1614	107.034	pplu	1	0.63	0.002282	151.904	-0.831553	0.643	-7.4e-05	147.017	0.348861
1615	107.088	pplu	1	0.63	0.002282	151.842	-0.831141	0.644	-7.4e-05	146.741	0.350041
1616	107.142	pplu	1	0.626	0.002282	151.598	-0.831198	0.646	-7.5e-05	146.707	0.3512
1617	107.196	pplu	1	0.631	0.002282	151.488	-0.831629	0.643	-7.5e-05	147.033	0.352347
1618	107.25	pplu	1	0.63	0.002282	151.513	-0.832354	0.644	-7.6e-05	147.102	0.353485
1619	107.304	pplu	1	0.633	0.002282	151.592	-0.833303	0.647	-7.6e-05	147.068	0.354618
1620	107.358	pplu	1	0.631	0.002282	151.413	-0.834422	0.646	-7.7e-05	146.926	0.355747
1621	107.412	pplu	1	0.633	0.002282	151.478	-0.835669	0.643	-7.7e-05	146.934	0.356874
1622	107.466	pplu	1	0.632	0.002282	151.173	-0.837009	0.643	-7.7e-05	146.989	0.357998
1623	107.519	pplu	1	0.632	0.002282	151.235	-0.838418	0.643	-7.8e-05	146.968	0.35912
1624	107.573	pplu	1	0.629	0.002282	151.38	-0.839874	0.644	-7.8e-05	147.032	0.360239
1625	107.627	pplu	1	0.628	0.002282	151.606	-0.841362	0.643	-7.9e-05	147.075	0.361355
1626	107.681	pplu	1	0.633	0.002282	151.237	-0.842869	0.642	-7.9e-05	147.072	0.362467
1627	107.735	pplu	1	0.631	0.002282	151.124	-0.844385	0.646	-8e-05	147.163	0.363575
1628	107.789	pplu	1	0.633	0.002282	151.241	-0.8459	0.645	-8e-05	147.212	0.364679
1629	107.843	pplu	1	0.629	0.002282	151.012	-0.847409	0.643	-8e-05	147.124	0.365777
1630	107.897	pplu	1	0.634	0.002282	150.627	-0.848905	0.644	-8.1e-05	147.129	0.36687
1631	107.951	pplu	1	0.632	0.002282	150.867	-0.850385	0.643	-8.1e-05	147.204	0.367958
1632	108.005	pplu	1	0.636	0.002282	150.872	-0.851844	0.644	-8.1e-05	147.297	0.369039
1633	108.059	pplu	1	0.631	0.002282	151.042	-0.85328	0.643	-8.2e-05	147.425	0.370114
1634	108.113	pplu	1	0.634	0.002282	151.104	-0.85469	0.645	-8.2e-05	147.338	0.371182
1635	108.167	pplu	1	0.633	0.002282	150.819	-0.856073	0.644	-8.2e-05	147.435	0.372244
1636	108.22	pplu	1	0.634	0.002282	150.441	-0.857427	0.643	-8.3e-05	147.317	0.373299
1637	108.274	pplu	1	0.634	0.002282	150.447	-0.858751	0.643	-8.3e-05	147.309	0.374346
1638	108.328	pplu	1	0.629	0.002282	150.753	-0.860046	0.643	-8.3e-05	147.409	0.375386
1639	108.382	pplu	1	0.631	0.002282	150.678	-0.861311	0.644	-8.4e-05	147.33	0.376418
1640	108.436	pplu	1	0.632	0.002282	150.655	-0.862547	0.643	-8.4e-05	147.673	0.377442
1641	108.49	pplu	1	0.634	0.002282	150.738	-0.863755	0.641	-8.4e-05	147.811	0.378459
1642	108.544	pplu	1	0.632	0.002282	150.565	-0.864936	0.642	-8.4e-05	147.586	0.379467
1643	108.598	pplu	1	0.635	0.002282	150.479	-0.866091	0.644	-8.5e-05	147.556	0.380468
1644	108.652	pplu	1	0.635	0.002282	150.388	-0.867223	0.644	-8.5e-05	147.742	0.38146
1645	108.706	pplu	1	0.633	0.002282	150.371	-0.868333	0.643	-8.5e-05	147.402	0.382443
1646	108.76	pplu	1	0.635	0.002282	150.214	-0.869424	0.646	-8.5e-05	148.079	0.383419
1647	108.814	pplu	1	0.635	0.002282	150.099	-0.870497	0.642	-8.6e-05	148.013	0.384385
1648	108.868	pplu	1	0.634	0.002282	150.304	-0.871557	0.64	-8.6e-05	147.695	0.385344
1649	108.922	pplu	1	0.634	0.002282	150.529	-0.872605	0.644	-8.6e-05	147.73	0.386293
1650	108.975	pplu	1	0.631	0.002282	150.318	-0.873646	0.644	-8.6e-05	147.668	0.387234
1651	109.029	pplu	1	0.632	0.002282	150.271	-0.874683	0.645	-8.7e-05	147.521	0.388166
1652	109.083	pplu	1	0.633	0.002282	150.202	-0.87572	0.643	-8.7e-05	147.59	0.38909
1653	109.137	pplu	1	0.634	0.002282	150.293	-0.876761	0.646	-8.7e-05	147.597	0.390004
1654	109.191	pplu	1	0.634	0.002282	150.153	-0.877811	0.64	-8.7e-05	147.929	0.39091
1655	109.245	pplu	1	0.631	0.002282	149.901	-0.878874	0.643	-8.8e-05	147.725	0.391807
1656	109.299	pplu	1	0.636	0.002282	150.258	-0.879955	0.645	-8.8e-05	147.363	0.392695
1657	109.353	pplu	1	0.636	0.002282	150.313	-0.881059	0.642	-8.8e-05	147.56	0.393575
1658	109.407	pplu	1	0.637	0.002282	150.101	-0.882192	0.64	-8.8e-05	147.669	0.394446
1659	109.461	pplu	1	0.636	0.002282	149.997	-0.883359	0.642	-8.8e-05	147.715	0.395309
1660	109.515	pplu	1	0.637	0.002282	149.865	-0.884563	0.64	-8.8e-05	147.672	0.396163
1661	109.569	pplu	1	0.641	0.002282	149.952	-0.88581	0.641	-8.9e-05	147.981	0.397008
1662	109.623	pplu	1	0.636	0.002282	149.797	-0.887102	0.642	-8.9e-05	147.802	0.397845
1663	109.676	pplu	1	0.635	0.002282	149.655	-0.888444	0.644	-8.9e-05	147.54	0.398674
1664	109.73	pplu	1	0.635	0.002282	149.529	-0.889837	0.643	-8.9e-05	147.707	0.399495
1665	109.784	pplu	1	0.638	0.002282	149.319	-0.891284	0.645	-8.9e-05	147.858	0.400307
1666	109.838	pplu	1	0.641	0.002282	149.546	-0.892787	0.641	-8.9e-05	148.234	0.401112
1667	109.892	pplu	1	0.638	0.002282	149.228	-0.894346	0.643	-9e-05	147.906	0.401909
1668	109.946	pplu	1	0.64	0.002282	149.28	-0.895963	0.643	-9e-05	148.149	0.402699
1669	110	pplu	1	0.644	0.002282	149.084	-0.897633	0.643	-9e-05	148.259	0.403481
0	20	pplu	1	0.636	-0.000243	86.405	-0.193923	0.592	0.000526	143.793	-0.048282
1	20.054	pplu	1	0.629	-0.000243	86.555	-0.19053	0.591	0.000526	143.74	-0.048259
2	20.108	pplu	1	0.63	-0.000243	86.654	-0.187179	0.592	0.000527	143.909	-0.048239
3	20.162	pplu	1	0.628	-0.000243	86.311	-0.183869	0.593	0.000527	143.954	-0.04822
4	20.216	pplu	1	0.63	-0.000243	86.824	-0.180602	0.592	0.000527	143.931	-0.048204
5	20.27	pplu	1	0.628	-0.000243	86.402	-0.177376	0.594	0.000528	143.88	-0.04819
6	20.324	pplu	1	0.627	-0.000243	86.298	-0.17419	0.592	0.000528	143.849	-0.048179
7	20.377	pplu	1	0.631	-0.000243	86.426	-0.171045	0.594	0.000528	143.778	-0.04817
8	20.431	pplu	1	0.626	-0.000243	86.285	-0.167939	0.593	0.000529	143.9	-0.048163
9	20.485	pplu	1	0.631	-0.000243	85.876	-0.164871	0.592	0.000529	144.009	-0.04816
10	20.539	pplu	1	0.628	-0.000243	86.455	-0.161839	0.591	0.000529	143.906	-0.048159
11	20.593	pplu	1	0.628	-0.000243	86.424	-0.158841	0.592	0.00053	143.956	-0.048161
12	20.647	pplu	1	0.627	-0.000243	86.405	-0.155875	0.594	0.00053	143.676	-0.048166
13	20.701	pplu	1	0.628	-0.000243	86.066	-0.152938	0.592	0.000531	143.734	-0.048174
14	20.755	pplu	1	0.627	-0.000243	86.23	-0.150028	0.592	0.000531	143.699	-0.048185
15	20.809	pplu	1	0.625	-0.000243	86.319	-0.147142	0.592	0.000531	143.91	-0.048199
16	20.863	pplu	1	0.628	-0.000243	86.018	-0.144276	0.595	0.000532	143.933	-0.048217
17	20.917	pplu	1	0.628	-0.000243	86.338	-0.141429	0.594	0.000532	143.678	-0.048238
18	20.971	pplu	1	0.627	-0.000243	86.389	-0.138595	0.594	0.000533	144.001	-0.048263
19	21.025	pplu	1	0.627	-0.000243	86.258	-0.135774	0.594	0.000533	143.985	-0.048292
20	21.078	pplu	1	0.629	-0.000243	86.177	-0.132961	0.593	0.000533	143.827	-0.048324
21	21.132	pplu	1	0.628	-0.000243	86.046	-0.130154	0.593	0.000534	143.693	-0.04836
22	21.186	pplu	1	0.629	-0.000243	86.401	-0.127349	0.593	0.000534	143.485	-0.0484
23	21.24	pplu	1	0.625	-0.000243	86.403	-0.124543	0.593	0.000535	143.667	-0.048444
24	21.294	pplu	1	0.625	-0.000243	85.943	-0.121734	0.592	0.000535	144.105	-0.048493
25	21.348	pplu	1	0.628	-0.000243	86.305	-0.118919	0.592	0.000536	143.944	-0.048545
26	21.402	pplu	1	0.626	-0.000243	86.47	-0.116095	0.593	0.000536	143.536	-0.048602
27	21.456	pplu	1	0.63	-0.000243	86.204	-0.113259	0.593	0.000537	143.428	-0.048664
28	21.51	pplu	1	0.625	-0.000243	86.205	-0.110409	0.593	0.000537	143.349	-0.04873
29	21.564	pplu	1	0.631	-0.000243	86.376	-0.107543	0.592	0.000538	143.401	-0.0488
30	21.618	pplu	1	0.629	-0.000243	86.1	-0.104659	0.592	0.000538	143.858	-0.048876
31	21.672	pplu	1	0.628	-0.000243	86.333	-0.101754	0.594	0.000539	143.757	-0.048956
32	21.726	pplu	1	0.629	-0.000243	86.467	-0.098828	0.593	0.000539	143.846	-0.049041
33	21.78	pplu	1	0.628	-0.000243	86.142	-0.095879	0.592	0.00054	143.838	-0.049131
34	21.833	pplu	1	0.631	-0.000243	86.406	-0.092906	0.593	0.00054	143.536	-0.049225
35	21.887	pplu	1	0.624	-0.000243	86.632	-0.089908	0.592	0.000541	143.693	-0.049325
36	21.941	pplu	1	0.626	-0.000243	86.268	-0.086884	0.592	0.000541	143.714	-0.04943
37	21.995	pplu	1	0.629	-0.000243	86.197	-0.083835	0.594	0.000542	143.48	-0.04954
38	22.049	pplu	1	0.629	-0.000243	86.332	-0.08076	0.592	0.000542	143.733	-0.049655
39	22.103	pplu	1	0.625	-0.000243	86.122	-0.07766	0.592	0.000543	143.687	-0.049776
40	22.157	pplu	1	0.626	-0.000243	86.186	-0.074535	0.593	0.000544	143.631	-0.049901
41	22.211	pplu	1	0.626	-0.000243	86.56	-0.071386	0.59	0.000544	143.606	-0.050031
42	22.265	pplu	1	0.629	-0.000243	86.163	-0.068215	0.593	0.000545	143.39	-0.050167
43	22.319	pplu	1	0.627	-0.000243	86.176	-0.065025	0.593	0.000545	143.118	-0.050307
44	22.373	pplu	1	0.629	-0.000243	86.264	-0.061818	0.592	0.000546	143.347	-0.050451
45	22.427	pplu	1	0.628	-0.000243	86.289	-0.058599	0.593	0.000547	143.123	-0.0506
46	22.481	pplu	1	0.627	-0.000243	86.471	-0.055375	0.592	0.000547	143.415	-0.050754
47	22.534	pplu	1	0.627	-0.000243	86.317	-0.052153	0.595	0.000548	143.517	-0.050911
48	22.588	pplu	1	0.628	-0.000243	86.294	-0.048945	0.596	0.000548	143.348	-0.051071
49	22.642	pplu	1	0.628	-0.000243	86.45	-0.045766	0.593	0.000549	143.456	-0.051235
50	22.696	pplu	1	0.628	-0.000243	86.36	-0.042635	0.593	0.00055	143.401	-0.051401
51	22.75	pplu	1	0.626	-0.000243	86.314	-0.039581	0.592	0.00055	143.24	-0.05157
52	22.804	pplu	1	0.627	-0.000243	86.317	-0.036639	0.592	0.000551	143.719	-0.05174
53	22.858	pplu	1	0.626	-0.000243	86.355	-0.033857	0.592	0.000552	143.462	-0.051914
54	22.912	pplu	1	0.627	-0.000243	86.418	-0.031295	0.593	0.000552	143.678	-0.05209
55	22.966	pplu	1	0.628	-0.000243	86.356	-0.029027	0.593	0.000553	143.743	-0.052271
56	23.02	pplu	1	0.626	-0.000243	86.381	-0.027135	0.593	0.000554	143.75	-0.052458
57	23.074	pplu	1	0.628	-0.000243	86.385	-0.025696	0.592	0.000555	143.603	-0.052656
58	23.128	pplu	1	0.628	-0.000243	86.374	-0.024564	0.594	0.000556	143.811	-0.053091
59	23.182	pplu	1	0.627	-0.000243	86.246	-0.023707	0.594	0.000557	143.765	-0.053672
60	23.235	pplu	1	0.628	-0.000243	86.244	-0.023141	0.593	0.000559	143.603	-0.054273
61	23.289	pplu	1	0.627	-0.000243	86.281	-0.022878	0.592	0.00056	143.621	-0.054894
62	23.343	pplu	1	0.627	-0.000243	86.027	-0.022929	0.592	0.000562	143.441	-0.055532
63	23.397	pplu	1	0.628	-0.000243	86.162	-0.023299	0.596	0.000563	143.784	-0.056185
64	23.451	pplu	1	0.628	-0.000243	86.4	-0.023986	0.596	0.000565	143.906	-0.056852
65	23.505	pplu	1	0.628	-0.000243	86.276	-0.024988	0.594	0.000567	143.704	-0.05753
66	23.559	pplu	1	0.629	-0.000243	86.131	-0.026289	0.596	0.000569	143.812	-0.058219
67	23.613	pplu	1	0.627	-0.000243	86.021	-0.027872	0.596	0.000571	143.78	-0.058916
68	23.667	pplu	1	0.626	-0.000243	85.804	-0.029707	0.594	0.000572	143.616	-0.05962
69	23.721	pplu	1	0.626	-0.000243	85.827	-0.03176	0.595	0.000574	143.784	-0.06033
70	23.775	pplu	1	0.627	-0.000243	86.197	-0.033993	0.594	0.000576	143.671	-0.061044
71	23.829	pplu	1	0.627	-0.000243	86.083	-0.036358	0.594	0.000578	143.664	-0.061761
72	23.883	pplu	1	0.628	-0.000243	85.991	-0.038806	0.595	0.00058	143.788	-0.062481
73	23.936	pplu	1	0.63	-0.000243	86.235	-0.041282	0.594	0.000582	143.497	-0.063201
74	23.99	pplu	1	0.628	-0.000243	86.002	-0.043733	0.594	0.000584	143.477	-0.063922
75	24.044	pplu	1	0.626	-0.000243	85.79	-0.046101	0.596	0.000586	143.459	-0.064641
76	24.098	pplu	1	0.626	-0.000243	86.065	-0.048333	0.597	0.000588	143.498	-0.065358
77	24.152	pplu	1	0.625	-0.000243	86.246	-0.050377	0.595	0.00059	143.648	-0.066073
78	24.206	pplu	1	0.627	-0.000243	86.465	-0.052187	0.593	0.000592	143.41	-0.066784
79	24.26	pplu	1	0.627	-0.000243	86.503	-0.053721	0.593	0.000594	143.356	-0.06749
80	24.314	pplu	1	0.628	-0.000243	86.066	-0.054947	0.594	0.000596	143.634	-0.06819
81	24.368	pplu	1	0.627	-0.000243	85.985	-0.055841	0.595	0.000598	143.611	-0.068884
82	24.422	pplu	1	0.625	-0.000243	86.098	-0.056387	0.593	0.0006	143.567	-0.069571
83	24.476	pplu	1	0.624	-0.000243	86.145	-0.056579	0.594	0.000602	143.835	-0.07025
84	24.53	pplu	1	0.628	-0.000243	86.252	-0.05642	0.595	0.000604	143.726	-0.070921
85	24.584	pplu	1	0.628	-0.000243	85.958	-0.05592	0.593	0.000606	143.597	-0.071582
86	24.638	pplu	1	0.626	-0.000243	86.233	-0.055098	0.593	0.000608	143.534	-0.072232
87	24.691	pplu	1	0.625	-0.000243	86.21	-0.05398	0.596	0.00061	143.486	-0.072872
88	24.745	pplu	1	0.624	-0.000243	86.186	-0.052593	0.596	0.000612	143.498	-0.0735
89	24.799	pplu	1	0.626	-0.000243	86.511	-0.050968	0.594	0.000614	143.602	-0.074115
90	24.853	pplu	1	0.626	-0.000243	86.175	-0.049138	0.59	0.000616	143.517	-0.074716
91	24.907	pplu	1	0.626	-0.000243	86.124	-0.047138	0.593	0.000618	143.638	-0.075302
92	24.961	pplu	1	0.628	-0.000243	86.359	-0.045005	0.595	0.00062	143.687	-0.075872
93	25.015	pplu	1	0.628	-0.000243	86.318	-0.042777	0.593	0.000622	143.746	-0.076426
94	25.069	pplu	1	0.626	-0.000243	86.162	-0.040493	0.595	0.000624	143.705	-0.076961
95	25.123	pplu	1	0.628	-0.000243	86.058	-0.038189	0.594	0.000626	143.562	-0.077478
96	25.177	pplu	1	0.626	-0.000243	86.183	-0.035902	0.594	0.000628	143.815	-0.077974
97	25.231	pplu	1	0.623	-0.000243	85.996	-0.033667	0.597	0.000629	143.754	-0.07845
98	25.285	pplu	1	0.625	-0.000243	86.422	-0.031518	0.593	0.000631	143.661	-0.078904
99	25.339	pplu	1	0.624	-0.000243	86.162	-0.029484	0.596	0.000633	143.596	-0.079335
100	25.392	pplu	1	0.63	-0.000243	86.218	-0.027595	0.597	0.000635	143.277	-0.079743
101	25.446	pplu	1	0.631	-0.000243	86.366	-0.025877	0.596	0.000637	143.605	-0.080126
102	25.5	pplu	1	0.626	-0.000243	86.131	-0.024355	0.596	0.000639	143.475	-0.080483
103	25.554	pplu	1	0.626	-0.000243	86.18	-0.023054	0.594	0.000641	143.304	-0.080814
104	25.608	pplu	1	0.628	-0.000243	86.302	-0.021994	0.594	0.000644	143.798	-0.081118
105	25.662	pplu	1	0.628	-0.000243	86.278	-0.021192	0.597	0.000646	143.531	-0.081395
106	25.716	pplu	1	0.625	-0.000243	86.225	-0.020659	0.596	0.000648	143.347	-0.081645
107	25.77	pplu	1	0.628	-0.000243	86.162	-0.020401	0.596	0.00065	143.418	-0.081866
108	25.824	pplu	1	0.628	-0.000243	86.527	-0.020418	0.597	0.000652	143.401	-0.082061
109	25.878	pplu	1	0.627	-0.000243	86.143	-0.020706	0.597	0.000654	143.299	-0.082228
110	25.932	pplu	1	0.628	-0.000243	86.134	-0.021256	0.596	0.000657	143.173	-0.082369
111	25.986	pplu	1	0.627	-0.000243	86.23	-0.022054	0.596	0.000659	143.073	-0.082483
112	26.04	pplu	1	0.627	-0.000243	86.31	-0.023078	0.594	0.000661	143.126	-0.082573
113	26.093	pplu	1	0.627	-0.000243	86.266	-0.024306	0.594	0.000663	143.32	-0.082638
114	26.147	pplu	1	0.628	-0.000243	86.132	-0.025709	0.594	0.000665	143.125	-0.08268
115	26.201	pplu	1	0.627	-0.000243	85.871	-0.027258	0.594	0.000668	143.271	-0.082699
116	26.255	pplu	1	0.625	-0.000243	85.893	-0.028917	0.595	0.00067	143.279	-0.082698
117	26.309	pplu	1	0.625	-0.000243	86.23	-0.030649	0.595	0.000672	143.213	-0.082677
118	26.363	pplu	1	0.627	-0.000243	86.002	-0.032415	0.597	0.000674	143.306	-0.082638
119	26.417	pplu	1	0.628	-0.000243	85.98	-0.034173	0.597	0.000676	143.355	-0.082583
120	26.471	pplu	1	0.626	-0.000243	85.644	-0.035886	0.595	0.000678	143.164	-0.082513
121	26.525	pplu	1	0.627	-0.000243	85.644	-0.03752	0.595	0.00068	143.006	-0.08243
122	26.579	pplu	1	0.626	-0.000243	86.045	-0.039043	0.596	0.000682	143.049	-0.082336
123	26.633	pplu	1	0.625	-0.000243	85.812	-0.040428	0.596	0.000684	143.208	-0.082232
124	26.687	pplu	1	0.625	-0.000243	85.751	-0.041652	0.596	0.000685	143.361	-0.082121
125	26.741	pplu	1	0.626	-0.000243	86.003	-0.042695	0.597	0.000687	143.368	-0.082003
126	26.794	pplu	1	0.625	-0.000243	86.053	-0.043544	0.596	0.000689	143.273	-0.081882
127	26.848	pplu	1	0.626	-0.000243	85.732	-0.04419	0.595	0.00069	143.121	-0.081759
128	26.902	pplu	1	0.625	-0.000243	85.766	-0.044629	0.593	0.000692	142.989	-0.081635
129	26.956	pplu	1	0.625	-0.000243	86.192	-0.044864	0.594	0.000693	143.014	-0.081513
130	27.01	pplu	1	0.627	-0.000243	86.228	-0.044897	0.597	0.000695	143.223	-0.081393
131	27.064	pplu	1	0.626	-0.000243	86.092	-0.044735	0.595	0.000696	143.423	-0.081278
132	27.118	pplu	1	0.627	-0.000243	86.13	-0.044384	0.595	0.000697	143.353	-0.081169
133	27.172	pplu	1	0.627	-0.000243	86.267	-0.043854	0.596	0.000699	143.264	-0.081069
134	27.226	pplu	1	0.626	-0.000243	86.312	-0.043156	0.597	0.0007	143.367	-0.080977
135	27.28	pplu	1	0.627	-0.000243	86.276	-0.042304	0.598	0.000701	143.047	-0.080896
136	27.334	pplu	1	0.625	-0.000243	86.427	-0.041311	0.596	0.000702	143.129	-0.080826
137	27.388	pplu	1	0.625	-0.000243	86.469	-0.040192	0.596	0.000703	143.355	-0.080768
138	27.442	pplu	1	0.625	-0.000243	86.169	-0.038967	0.596	0.000704	143.236	-0.080724
139	27.496	pplu	1	0.626	-0.000243	86.071	-0.037655	0.595	0.000706	143.043	-0.080693
140	27.549	pplu	1	0.627	-0.000243	86.344	-0.036281	0.594	0.000707	143.171	-0.080677
141	27.603	pplu	1	0.626	-0.000243	86.359	-0.03487	0.596	0.000708	143.353	-0.080676
142	27.657	pplu	1	0.626	-0.000243	86.125	-0.033445	0.597	0.000709	143.31	-0.08069
143	27.711	pplu	1	0.628	-0.000243	86.06	-0.032031	0.598	0.00071	143.408	-0.08072
144	27.765	pplu	1	0.628	-0.000244	86.024	-0.030649	0.598	0.000711	143.393	-0.080765
145	27.819	pplu	1	0.627	-0.000244	86.113	-0.029321	0.597	0.000712	143.429	-0.080824
146	27.873	pplu	1	0.628	-0.000244	86.15	-0.02807	0.597	0.000713	143.192	-0.080899
147	27.927	pplu	1	0.626	-0.000244	86.126	-0.026916	0.597	0.000714	143.285	-0.080988
148	27.981	pplu	1	0.623	-0.000244	86.101	-0.025882	0.598	0.000715	143.18	-0.081091
149	28.035	pplu	1	0.625	-0.000244	85.874	-0.024983	0.596	0.000717	143.303	-0.081206
150	28.089	pplu	1	0.627	-0.000244	85.891	-0.024235	0.595	0.000718	143.629	-0.081333
151	28.143	pplu	1	0.625	-0.000244	86.253	-0.023649	0.597	0.000719	143.311	-0.08147
152	28.197	pplu	1	0.625	-0.000244	86.279	-0.023233	0.597	0.00072	143.339	-0.081615
153	28.25	pplu	1	0.627	-0.000244	85.798	-0.022992	0.596	0.000721	143.467	-0.081768
154	28.304	pplu	1	0.627	-0.000244	85.652	-0.022925	0.599	0.000723	143.361	-0.081926
155	28.358	pplu	1	0.628	-0.000245	85.874	-0.023028	0.597	0.000724	143.405	-0.082086
156	28.412	pplu	1	0.627	-0.000245	85.889	-0.023299	0.599	0.000725	143.53	-0.082249
157	28.466	pplu	1	0.628	-0.000245	86.006	-0.023731	0.597	0.000727	143.104	-0.08241
158	28.52	pplu	1	0.628	-0.000245	86.02	-0.024315	0.597	0.000728	143.235	-0.082569
159	28.574	pplu	1	0.625	-0.000245	85.818	-0.02504	0.596	0.000729	143.497	-0.082724
160	28.628	pplu	1	0.625	-0.000245	85.869	-0.025892	0.598	0.000731	143.133	-0.082873
161	28.682	pplu	1	0.626	-0.000245	86.18	-0.026853	0.601	0.000732	143.373	-0.083013
162	28.736	pplu	1	0.626	-0.000245	86.25	-0.027903	0.597	0.000733	143.068	-0.083145
163	28.79	pplu	1	0.624	-0.000246	85.946	-0.029016	0.594	0.000735	142.925	-0.083265
164	28.844	pplu	1	0.623	-0.000246	85.719	-0.030165	0.596	0.000736	143.222	-0.083373
165	28.898	pplu	1	0.627	-0.000246	85.86	-0.031321	0.598	0.000737	142.979	-0.083468
166	28.951	pplu	1	0.628	-0.000246	86.1	-0.032454	0.598	0.000739	143.199	-0.083549
167	29.005	pplu	1	0.626	-0.000246	86.142	-0.033534	0.598	0.00074	143.277	-0.083613
168	29.059	pplu	1	0.627	-0.000246	85.969	-0.034533	0.598	0.000741	142.952	-0.083661
169	29.113	pplu	1	0.627	-0.000246	86.012	-0.035425	0.6	0.000742	143.073	-0.08369
170	29.167	pplu	1	0.625	-0.000247	86.294	-0.036186	0.595	0.000743	143.247	-0.0837
171	29.221	pplu	1	0.625	-0.000247	86.015	-0.036791	0.596	0.000744	143.244	-0.083689
172	29.275	pplu	1	0.624	-0.000247	86.026	-0.037222	0.597	0.000745	143.496	-0.083657
173	29.329	pplu	1	0.626	-0.000247	86.261	-0.037464	0.6	0.000746	143.476	-0.083603
174	29.383	pplu	1	0.626	-0.000247	86.095	-0.037509	0.599	0.000747	143.316	-0.083526
175	29.437	pplu	1	0.626	-0.000248	85.959	-0.037357	0.599	0.000748	143.268	-0.083425
176	29.491	pplu	1	0.628	-0.000248	86.26	-0.037015	0.599	0.000749	143.058	-0.083301
177	29.545	pplu	1	0.625	-0.000248	86.203	-0.036496	0.597	0.00075	143.207	-0.083152
178	29.599	pplu	1	0.625	-0.000248	85.988	-0.035822	0.595	0.000751	143.351	-0.082977
179	29.652	pplu	1	0.626	-0.000249	86.113	-0.03502	0.599	0.000751	143.35	-0.082778
180	29.706	pplu	1	0.624	-0.000249	85.885	-0.034125	0.6	0.000752	143.074	-0.082553
181	29.76	pplu	1	0.622	-0.000249	86.065	-0.033177	0.598	0.000752	142.785	-0.082302
182	29.814	pplu	1	0.623	-0.000249	86.09	-0.032222	0.597	0.000753	142.942	-0.082026
183	29.868	pplu	1	0.625	-0.00025	85.762	-0.031306	0.598	0.000753	143.361	-0.081724
184	29.922	pplu	1	0.624	-0.00025	85.803	-0.030475	0.598	0.000754	143.282	-0.081397
185	29.976	pplu	1	0.625	-0.00025	86.158	-0.029774	0.598	0.000754	143.071	-0.081045
186	30.03	pplu	1	0.626	-0.000251	85.898	-0.029244	0.598	0.000754	143.005	-0.080669
187	30.084	pplu	1	0.624	-0.000251	85.934	-0.028922	0.599	0.000754	143.126	-0.08027
188	30.138	pplu	1	0.626	-0.000251	86.242	-0.028834	0.599	0.000754	143.068	-0.079849
189	30.192	pplu	1	0.622	-0.000252	86.012	-0.029	0.598	0.000754	142.862	-0.079407
190	30.246	pplu	1	0.622	-0.000252	85.847	-0.029426	0.599	0.000754	142.833	-0.078945
191	30.3	pplu	1	0.624	-0.000252	85.942	-0.030112	0.598	0.000754	142.911	-0.078466
192	30.354	pplu	1	0.625	-0.000253	86.055	-0.031048	0.596	0.000754	143.115	-0.077969
193	30.407	pplu	1	0.623	-0.000253	86.396	-0.032212	0.597	0.000754	143.085	-0.077458
194	30.461	pplu	1	0.626	-0.000254	85.968	-0.033579	0.599	0.000754	142.839	-0.076934
195	30.515	pplu	1	0.627	-0.000254	86.025	-0.035112	0.599	0.000754	142.785	-0.076398
196	30.569	pplu	1	0.625	-0.000255	85.991	-0.03677	0.599	0.000754	142.588	-0.075853
197	30.623	pplu	1	0.625	-0.000255	85.922	-0.038508	0.601	0.000754	142.663	-0.0753
198	30.677	pplu	1	0.627	-0.000255	85.793	-0.040278	0.599	0.000754	142.81	-0.074742
199	30.731	pplu	1	0.627	-0.000256	86.048	-0.042036	0.596	0.000753	142.791	-0.074181
200	30.785	pplu	1	0.625	-0.000256	86.006	-0.043739	0.597	0.000753	142.966	-0.073619
201	30.839	pplu	1	0.625	-0.000257	85.736	-0.045348	0.598	0.000753	142.967	-0.073057
202	30.893	pplu	1	0.626	-0.000257	85.823	-0.04683	0.598	0.000753	142.749	-0.072499
203	30.947	pplu	1	0.626	-0.000258	85.889	-0.048158	0.597	0.000753	142.897	-0.071946
204	31.001	pplu	1	0.626	-0.000259	85.901	-0.049307	0.6	0.000753	142.844	-0.0714
205	31.055	pplu	1	0.626	-0.000259	85.919	-0.050261	0.599	0.000753	142.745	-0.070864
206	31.108	pplu	1	0.628	-0.00026	85.909	-0.051006	0.597	0.000752	142.828	-0.070339
207	31.162	pplu	1	0.627	-0.00026	85.896	-0.051538	0.597	0.000752	142.685	-0.069828
208	31.216	pplu	1	0.627	-0.000261	85.994	-0.051858	0.597	0.000752	142.757	-0.069332
209	31.27	pplu	1	0.626	-0.000261	85.837	-0.051972	0.599	0.000752	143.252	-0.068853
210	31.324	pplu	1	0.626	-0.000262	85.754	-0.051892	0.599	0.000752	142.73	-0.068393
211	31.378	pplu	1	0.626	-0.000263	85.865	-0.051634	0.603	0.000752	142.734	-0.067954
212	31.432	pplu	1	0.625	-0.000263	85.828	-0.051217	0.6	0.000752	143.124	-0.067537
213	31.486	pplu	1	0.624	-0.000264	85.913	-0.050663	0.601	0.000752	143.21	-0.067144
214	31.54	pplu	1	0.625	-0.000264	85.857	-0.049996	0.602	0.000752	143.141	-0.066776
215	31.594	pplu	1	0.627	-0.000265	85.896	-0.049234	0.599	0.000752	142.947	-0.066436
216	31.648	pplu	1	0.626	-0.000266	86.099	-0.048397	0.605	0.000752	142.845	-0.066124
217	31.702	pplu	1	0.626	-0.000266	86.234	-0.047505	0.604	0.000751	142.971	-0.065841
218	31.756	pplu	1	0.624	-0.000267	86.14	-0.046577	0.602	0.000751	142.919	-0.065589
219	31.809	pplu	1	0.623	-0.000267	85.894	-0.045633	0.601	0.000751	142.809	-0.065369
220	31.863	pplu	1	0.622	-0.000268	85.899	-0.044695	0.601	0.000751	142.677	-0.06518
221	31.917	pplu	1	0.622	-0.000269	86.225	-0.043783	0.6	0.000751	143.027	-0.065024
222	31.971	pplu	1	0.624	-0.000269	86.259	-0.042917	0.599	0.00075	142.837	-0.064902
223	32.025	pplu	1	0.625	-0.00027	86.012	-0.04211	0.6	0.00075	142.883	-0.064814
224	32.079	pplu	1	0.627	-0.000271	86.001	-0.041376	0.599	0.00075	142.967	-0.06476
225	32.133	pplu	1	0.626	-0.000271	86.186	-0.040729	0.597	0.00075	142.942	-0.06474
226	32.187	pplu	1	0.624	-0.000272	86.135	-0.04018	0.599	0.000749	143.024	-0.064756
227	32.241	pplu	1	0.628	-0.000273	86.006	-0.039739	0.599	0.000749	142.912	-0.064806
228	32.295	pplu	1	0.627	-0.000273	86.038	-0.039411	0.6	0.000749	142.837	-0.064891
229	32.349	pplu	1	0.625	-0.000274	85.913	-0.039202	0.598	0.000749	142.991	-0.065011
230	32.403	pplu	1	0.624	-0.000275	85.904	-0.03911	0.602	0.000748	142.932	-0.065163
231	32.457	pplu	1	0.624	-0.000276	85.904	-0.039135	0.6	0.000748	142.914	-0.065347
232	32.51	pplu	1	0.628	-0.000276	85.902	-0.03927	0.597	0.000748	142.856	-0.065563
233	32.564	pplu	1	0.627	-0.000277	86.056	-0.039504	0.597	0.000747	143.062	-0.065808
234	32.618	pplu	1	0.624	-0.000278	85.832	-0.039824	0.601	0.000747	142.93	-0.066082
235	32.672	pplu	1	0.624	-0.000278	85.579	-0.040213	0.598	0.000747	143.001	-0.066381
236	32.726	pplu	1	0.625	-0.000279	85.796	-0.040652	0.601	0.000747	142.986	-0.066706
237	32.78	pplu	1	0.627	-0.00028	85.792	-0.041125	0.6	0.000746	142.897	-0.067053
238	32.834	pplu	1	0.626	-0.000281	85.606	-0.041614	0.601	0.000746	142.918	-0.067421
239	32.888	pplu	1	0.624	-0.000282	85.597	-0.042104	0.601	0.000746	143.065	-0.067809
240	32.942	pplu	1	0.624	-0.000282	85.555	-0.04258	0.601	0.000746	143.096	-0.068214
241	32.996	pplu	1	0.625	-0.000283	85.645	-0.043029	0.6	0.000746	143.112	-0.068636
242	33.05	pplu	1	0.624	-0.000284	85.666	-0.043441	0.599	0.000746	143.147	-0.069074
243	33.104	pplu	1	0.624	-0.000285	85.551	-0.043807	0.601	0.000746	142.995	-0.069524
244	33.158	pplu	1	0.626	-0.000286	85.476	-0.044122	0.603	0.000746	142.964	-0.069988
245	33.212	pplu	1	0.626	-0.000287	85.586	-0.044381	0.601	0.000747	142.971	-0.070463
246	33.265	pplu	1	0.627	-0.000287	85.751	-0.044583	0.599	0.000747	142.724	-0.070947
247	33.319	pplu	1	0.627	-0.000288	85.906	-0.044725	0.599	0.000747	142.75	-0.071442
248	33.373	pplu	1	0.623	-0.000289	85.9	-0.044802	0.601	0.000748	142.956	-0.071944
249	33.427	pplu	1	0.623	-0.00029	85.686	-0.044809	0.603	0.000748	142.746	-0.072454
250	33.481	pplu	1	0.623	-0.000291	85.95	-0.044741	0.604	0.000749	143.038	-0.07297
251	33.535	pplu	1	0.623	-0.000292	86.009	-0.044591	0.602	0.00075	142.792	-0.073492
252	33.589	pplu	1	0.626	-0.000293	85.909	-0.044355	0.601	0.00075	142.592	-0.074017
253	33.643	pplu	1	0.623	-0.000294	85.943	-0.044026	0.6	0.000751	142.88	-0.074547
254	33.697	pplu	1	0.626	-0.000294	85.994	-0.043602	0.6	0.000752	142.755	-0.075078
255	33.751	pplu	1	0.626	-0.000295	86.014	-0.043082	0.601	0.000753	142.931	-0.07561
256	33.805	pplu	1	0.625	-0.000296	86.039	-0.042464	0.599	0.000754	143.229	-0.076142
257	33.859	pplu	1	0.624	-0.000297	85.996	-0.041754	0.601	0.000755	143.07	-0.076671
258	33.913	pplu	1	0.626	-0.000298	85.905	-0.040956	0.602	0.000756	142.909	-0.077197
259	33.966	pplu	1	0.625	-0.000299	86.133	-0.040076	0.603	0.000757	142.927	-0.077718
260	34.02	pplu	1	0.623	-0.0003	86.287	-0.039125	0.601	0.000758	142.71	-0.078232
261	34.074	pplu	1	0.623	-0.000301	85.916	-0.038111	0.601	0.000759	143.157	-0.078736
262	34.128	pplu	1	0.626	-0.000302	85.792	-0.037048	0.601	0.00076	143	-0.079228
263	34.182	pplu	1	0.627	-0.000302	85.968	-0.035947	0.6	0.000761	142.983	-0.079706
264	34.236	pplu	1	0.626	-0.000303	85.637	-0.034823	0.604	0.000763	142.907	-0.080167
265	34.29	pplu	1	0.626	-0.000304	85.758	-0.033691	0.604	0.000764	142.384	-0.080609
266	34.344	pplu	1	0.624	-0.000305	85.982	-0.032566	0.604	0.000765	142.658	-0.081029
267	34.398	pplu	1	0.627	-0.000306	85.834	-0.031466	0.601	0.000766	142.879	-0.081424
268	34.452	pplu	1	0.625	-0.000307	85.731	-0.030408	0.601	0.000768	142.96	-0.081793
269	34.506	pplu	1	0.623	-0.000307	85.75	-0.02941	0.601	0.000769	143.035	-0.082132
270	34.56	pplu	1	0.621	-0.000308	85.666	-0.028487	0.601	0.00077	142.868	-0.08244
271	34.614	pplu	1	0.625	-0.000309	85.493	-0.027653	0.603	0.000772	142.905	-0.082714
272	34.667	pplu	1	0.626	-0.00031	85.793	-0.026922	0.603	0.000773	142.53	-0.082954
273	34.721	pplu	1	0.625	-0.000311	85.773	-0.026305	0.603	0.000775	142.542	-0.083157
274	34.775	pplu	1	0.625	-0.000311	85.744	-0.025815	0.6	0.000776	142.553	-0.083322
275	34.829	pplu	1	0.626	-0.000312	85.673	-0.02546	0.603	0.000777	142.238	-0.083449
276	34.883	pplu	1	0.621	-0.000313	85.613	-0.025246	0.602	0.000779	142.569	-0.083537
277	34.937	pplu	1	0.624	-0.000314	85.568	-0.025177	0.6	0.00078	142.748	-0.083585
278	34.991	pplu	1	0.624	-0.000314	86.028	-0.025253	0.6	0.000781	142.674	-0.083594
279	35.045	pplu	1	0.624	-0.000315	85.997	-0.025466	0.604	0.000783	142.539	-0.083565
280	35.099	pplu	1	0.624	-0.000316	85.802	-0.025808	0.603	0.000784	142.494	-0.083497
281	35.153	pplu	1	0.624	-0.000317	85.757	-0.026263	0.602	0.000785	142.184	-0.083392
282	35.207	pplu	1	0.626	-0.000317	85.605	-0.026814	0.601	0.000787	142.377	-0.083251
283	35.261	pplu	1	0.626	-0.000318	85.567	-0.02744	0.603	0.000788	142.589	-0.083077
284	35.315	pplu	1	0.626	-0.000319	85.871	-0.028117	0.603	0.00079	142.409	-0.082869
285	35.368	pplu	1	0.623	-0.00032	85.759	-0.028824	0.601	0.000791	142.504	-0.082631
286	35.422	pplu	1	0.624	-0.00032	86.041	-0.029535	0.601	0.000792	142.589	-0.082364
287	35.476	pplu	1	0.626	-0.000321	85.701	-0.030225	0.602	0.000793	142.415	-0.08207
288	35.53	pplu	1	0.623	-0.000322	85.498	-0.030871	0.602	0.000795	142.475	-0.081752
289	35.584	pplu	1	0.625	-0.000323	85.799	-0.031449	0.603	0.000796	142.637	-0.081411
290	35.638	pplu	1	0.624	-0.000323	85.907	-0.031936	0.605	0.000797	142.619	-0.08105
291	35.692	pplu	1	0.623	-0.000324	85.876	-0.032314	0.603	0.000798	142.617	-0.080672
292	35.746	pplu	1	0.623	-0.000325	85.847	-0.032571	0.601	0.000799	142.698	-0.080279
293	35.8	pplu	1	0.625	-0.000326	85.781	-0.032697	0.6	0.000801	142.501	-0.079873
294	35.854	pplu	1	0.624	-0.000326	86.011	-0.03269	0.601	0.000802	142.415	-0.079458
295	35.908	pplu	1	0.625	-0.000327	85.921	-0.032552	0.602	0.000803	142.578	-0.079035
296	35.962	pplu	1	0.625	-0.000328	85.621	-0.032294	0.603	0.000804	142.582	-0.078606
297	36.016	pplu	1	0.623	-0.000329	85.574	-0.031931	0.603	0.000805	142.543	-0.078174
298	36.07	pplu	1	0.624	-0.00033	85.866	-0.031484	0.602	0.000806	142.76	-0.077739
299	36.123	pplu	1	0.623	-0.000331	85.883	-0.030979	0.604	0.000807	142.914	-0.077305
300	36.177	pplu	1	0.623	-0.000331	85.848	-0.030446	0.606	0.000808	142.763	-0.076872
301	36.231	pplu	1	0.625	-0.000332	85.908	-0.029917	0.604	0.000809	142.799	-0.076442
302	36.285	pplu	1	0.625	-0.000333	85.715	-0.029429	0.603	0.000809	142.758	-0.076018
303	36.339	pplu	1	0.622	-0.000334	85.608	-0.029017	0.602	0.00081	142.744	-0.0756
304	36.393	pplu	1	0.621	-0.000335	85.784	-0.028712	0.603	0.000811	142.835	-0.07519
305	36.447	pplu	1	0.621	-0.000336	85.877	-0.028539	0.604	0.000812	142.639	-0.074789
306	36.501	pplu	1	0.624	-0.000336	85.8	-0.02852	0.6	0.000812	142.454	-0.074399
307	36.555	pplu	1	0.625	-0.000337	85.833	-0.028668	0.604	0.000813	142.514	-0.074019
308	36.609	pplu	1	0.622	-0.000338	85.805	-0.028992	0.603	0.000814	142.277	-0.073652
309	36.663	pplu	1	0.622	-0.000339	85.661	-0.029491	0.603	0.000814	142.384	-0.073297
310	36.717	pplu	1	0.623	-0.00034	85.804	-0.030159	0.602	0.000815	142.572	-0.072956
311	36.771	pplu	1	0.624	-0.00034	85.72	-0.030982	0.602	0.000815	142.439	-0.072629
312	36.824	pplu	1	0.625	-0.000341	85.629	-0.03194	0.604	0.000816	142.558	-0.072315
313	36.878	pplu	1	0.623	-0.000342	85.971	-0.033006	0.602	0.000816	142.411	-0.072014
314	36.932	pplu	1	0.623	-0.000343	85.767	-0.03415	0.603	0.000816	142.467	-0.071727
315	36.986	pplu	1	0.626	-0.000343	85.597	-0.035339	0.603	0.000817	142.879	-0.071453
316	37.04	pplu	1	0.625	-0.000344	85.654	-0.036537	0.601	0.000817	142.628	-0.071192
317	37.094	pplu	1	0.624	-0.000345	85.63	-0.037712	0.602	0.000817	142.782	-0.070943
318	37.148	pplu	1	0.624	-0.000345	85.498	-0.038827	0.605	0.000817	142.691	-0.070705
319	37.202	pplu	1	0.622	-0.000346	85.724	-0.039853	0.606	0.000817	142.561	-0.070478
320	37.256	pplu	1	0.623	-0.000347	85.757	-0.040763	0.605	0.000817	142.397	-0.070259
321	37.31	pplu	1	0.625	-0.000347	85.574	-0.041531	0.604	0.000817	142.607	-0.070049
322	37.364	pplu	1	0.623	-0.000348	85.573	-0.042139	0.605	0.000817	142.522	-0.069847
323	37.418	pplu	1	0.623	-0.000348	85.505	-0.042571	0.605	0.000817	142.634	-0.06965
324	37.472	pplu	1	0.622	-0.000349	85.743	-0.042818	0.605	0.000817	142.611	-0.069457
325	37.525	pplu	1	0.623	-0.00035	85.84	-0.042876	0.606	0.000817	142.807	-0.069268
326	37.579	pplu	1	0.623	-0.00035	85.698	-0.042744	0.605	0.000816	142.775	-0.069081
327	37.633	pplu	1	0.622	-0.000351	85.653	-0.042429	0.604	0.000816	142.697	-0.068893
328	37.687	pplu	1	0.625	-0.000351	85.764	-0.041943	0.604	0.000816	142.81	-0.068705
[truncated: 29,675 more rows]

## Sheet: DSC
	gene	temperature	Cp_kJ/mol/K	replicate
0	pplu	69.4214	0	0
1	pplu	69.4548	0.034169	0
2	pplu	69.4879	0.044218	0
3	pplu	69.5212	-0.116274	0
4	pplu	69.5545	-0.225815	0
5	pplu	69.5879	-0.392292	0
6	pplu	69.6213	-0.511883	0
7	pplu	69.6548	-0.605082	0
8	pplu	69.6885	-0.623489	0
9	pplu	69.7219	-0.494295	0
10	pplu	69.7555	-0.345837	0
11	pplu	69.7893	-0.167034	0
12	pplu	69.8227	-0.120743	0
13	pplu	69.8558	-0.125511	0
14	pplu	69.8888	-0.103179	0
15	pplu	69.9221	-0.177687	0
16	pplu	69.955	-0.275994	0
17	pplu	69.988	-0.256864	0
18	pplu	70.0213	-0.135429	0
19	pplu	70.0548	-0.199179	0
20	pplu	70.0884	-0.284721	0
21	pplu	70.1219	-0.271369	0
22	pplu	70.1556	-0.282522	0
23	pplu	70.1891	-0.395438	0
24	pplu	70.2227	-0.472712	0
25	pplu	70.2565	-0.475881	0
26	pplu	70.2902	-0.541629	0
27	pplu	70.3239	-0.594945	0
28	pplu	70.3575	-0.569795	0
29	pplu	70.3913	-0.434233	0
30	pplu	70.4251	-0.494247	0
31	pplu	70.4587	-0.573932	0
32	pplu	70.4924	-0.504057	0
33	pplu	70.5258	-0.486231	0
34	pplu	70.5594	-0.435843	0
35	pplu	70.5927	-0.495331	0
36	pplu	70.6261	-0.451209	0
37	pplu	70.6593	-0.461213	0
38	pplu	70.6926	-0.4855	0
39	pplu	70.7262	-0.522968	0
40	pplu	70.7596	-0.598731	0
41	pplu	70.7933	-0.679141	0
42	pplu	70.8269	-0.784269	0
43	pplu	70.8605	-0.674192	0
44	pplu	70.894	-0.709947	0
45	pplu	70.9276	-0.729529	0
46	pplu	70.9611	-0.769604	0
47	pplu	70.9945	-0.858637	0
48	pplu	71.0279	-0.84568	0
49	pplu	71.0613	-0.924372	0
50	pplu	71.0948	-0.914371	0
51	pplu	71.1284	-0.918186	0
52	pplu	71.1622	-0.938892	0
53	pplu	71.1958	-0.86102	0
54	pplu	71.2295	-0.917091	0
55	pplu	71.2631	-0.880465	0
56	pplu	71.2967	-0.831607	0
57	pplu	71.3302	-0.923349	0
58	pplu	71.3636	-0.912936	0
59	pplu	71.3971	-0.992233	0
60	pplu	71.4305	-0.928216	0
61	pplu	71.4641	-0.891961	0
62	pplu	71.4972	-0.926	0
63	pplu	71.5301	-0.836168	0
64	pplu	71.5632	-0.820365	0
65	pplu	71.5963	-0.81663	0
66	pplu	71.6293	-0.890359	0
67	pplu	71.6624	-1.02087	0
68	pplu	71.6958	-1.18118	0
69	pplu	71.7292	-1.33609	0
70	pplu	71.7627	-1.44289	0
71	pplu	71.796	-1.36341	0
72	pplu	71.8294	-1.34643	0
73	pplu	71.8628	-1.39279	0
74	pplu	71.8963	-1.26286	0
75	pplu	71.9299	-1.11018	0
76	pplu	71.9634	-1.07381	0
77	pplu	71.9969	-1.1679	0
78	pplu	72.0305	-1.18583	0
79	pplu	72.0641	-1.15872	0
80	pplu	72.0977	-1.20961	0
81	pplu	72.1311	-1.33227	0
82	pplu	72.1647	-1.47158	0
83	pplu	72.1981	-1.56647	0
84	pplu	72.2316	-1.63042	0
85	pplu	72.265	-1.63922	0
86	pplu	72.2985	-1.70521	0
87	pplu	72.3319	-1.70402	0
88	pplu	72.3655	-1.56556	0
89	pplu	72.399	-1.55912	0
90	pplu	72.4324	-1.66979	0
91	pplu	72.4659	-1.73253	0
92	pplu	72.4994	-1.72855	0
93	pplu	72.5329	-1.66025	0
94	pplu	72.566	-1.72608	0
95	pplu	72.5993	-1.69344	0
96	pplu	72.6327	-1.46548	0
97	pplu	72.6658	-1.40257	0
98	pplu	72.6991	-1.35533	0
99	pplu	72.7325	-1.39192	0
100	pplu	72.7661	-1.24655	0
101	pplu	72.7998	-1.18298	0
102	pplu	72.8334	-1.24708	0
103	pplu	72.8669	-1.17605	0
104	pplu	72.9006	-1.11512	0
105	pplu	72.9342	-1.11475	0
106	pplu	72.9676	-1.27156	0
107	pplu	73.0008	-1.27468	0
108	pplu	73.034	-1.27198	0
109	pplu	73.0676	-1.33409	0
110	pplu	73.1006	-1.31008	0
111	pplu	73.134	-1.34517	0
112	pplu	73.1673	-1.28263	0
113	pplu	73.2008	-1.23052	0
114	pplu	73.2343	-1.10298	0
115	pplu	73.2675	-1.04856	0
116	pplu	73.301	-1.09838	0
117	pplu	73.3345	-0.9959	0
118	pplu	73.3682	-1.02452	0
119	pplu	73.4018	-1.10607	0
120	pplu	73.4353	-1.20049	0
121	pplu	73.4689	-1.14443	0
122	pplu	73.5027	-1.14019	0
123	pplu	73.5361	-1.17565	0
124	pplu	73.5697	-1.06559	0
125	pplu	73.603	-1.09641	0
126	pplu	73.6362	-1.24179	0
127	pplu	73.6699	-1.40003	0
128	pplu	73.7032	-1.42837	0
129	pplu	73.7366	-1.44784	0
130	pplu	73.7697	-1.56924	0
131	pplu	73.803	-1.60959	0
132	pplu	73.8364	-1.5242	0
133	pplu	73.8697	-1.51205	0
134	pplu	73.9033	-1.48895	0
135	pplu	73.9368	-1.43569	0
136	pplu	73.9703	-1.4706	0
137	pplu	74.0039	-1.42182	0
138	pplu	74.0375	-1.43314	0
139	pplu	74.0709	-1.35776	0
140	pplu	74.1044	-1.44183	0
141	pplu	74.1381	-1.54646	0
142	pplu	74.1718	-1.57561	0
143	pplu	74.2054	-1.53703	0
144	pplu	74.2389	-1.55803	0
145	pplu	74.2723	-1.65708	0
146	pplu	74.3057	-1.62227	0
147	pplu	74.3389	-1.60079	0
148	pplu	74.3722	-1.60868	0
149	pplu	74.4057	-1.71693	0
150	pplu	74.4392	-1.73039	0
151	pplu	74.473	-1.63547	0
152	pplu	74.5066	-1.67282	0
153	pplu	74.5403	-1.63482	0
154	pplu	74.5739	-1.50814	0
155	pplu	74.6073	-1.33201	0
156	pplu	74.6408	-1.32361	0
157	pplu	74.6742	-1.32445	0
158	pplu	74.7076	-1.26988	0
159	pplu	74.741	-1.2888	0
160	pplu	74.7743	-1.23244	0
161	pplu	74.8076	-1.23003	0
162	pplu	74.8406	-1.1335	0
163	pplu	74.8735	-1.19073	0
164	pplu	74.9063	-1.18077	0
165	pplu	74.9395	-1.12322	0
166	pplu	74.9727	-1.16753	0
167	pplu	75.0061	-1.26747	0
168	pplu	75.0397	-1.39085	0
169	pplu	75.0734	-1.42125	0
170	pplu	75.1069	-1.44552	0
171	pplu	75.1405	-1.59548	0
172	pplu	75.174	-1.72943	0
173	pplu	75.2074	-1.77233	0
174	pplu	75.2411	-1.67698	0
175	pplu	75.2747	-1.67942	0
176	pplu	75.3086	-1.6595	0
177	pplu	75.3421	-1.57268	0
178	pplu	75.3757	-1.478	0
179	pplu	75.4092	-1.47939	0
180	pplu	75.4425	-1.59858	0
181	pplu	75.4756	-1.56185	0
182	pplu	75.5088	-1.59538	0
183	pplu	75.542	-1.55886	0
184	pplu	75.5751	-1.58107	0
185	pplu	75.6087	-1.58084	0
186	pplu	75.6425	-1.46868	0
187	pplu	75.6762	-1.60266	0
188	pplu	75.7098	-1.66561	0
189	pplu	75.7436	-1.74998	0
190	pplu	75.7771	-1.77969	0
191	pplu	75.8106	-1.70341	0
192	pplu	75.8439	-1.73058	0
193	pplu	75.8772	-1.5532	0
194	pplu	75.9107	-1.58404	0
195	pplu	75.9443	-1.53711	0
196	pplu	75.978	-1.58247	0
197	pplu	76.0117	-1.61217	0
198	pplu	76.0453	-1.57656	0
199	pplu	76.0788	-1.59076	0
200	pplu	76.1123	-1.44627	0
201	pplu	76.1456	-1.42293	0
202	pplu	76.1788	-1.20927	0
203	pplu	76.2121	-1.16881	0
204	pplu	76.2457	-1.19678	0
205	pplu	76.2794	-1.17905	0
206	pplu	76.3131	-1.21369	0
207	pplu	76.3467	-1.27898	0
208	pplu	76.3806	-1.39678	0
209	pplu	76.4144	-1.37275	0
210	pplu	76.4481	-1.33309	0
211	pplu	76.4817	-1.33267	0
212	pplu	76.5148	-1.31596	0
213	pplu	76.5481	-1.21192	0
214	pplu	76.5811	-1.122	0
215	pplu	76.614	-1.07177	0
216	pplu	76.6468	-1.09393	0
217	pplu	76.6797	-1.08143	0
218	pplu	76.713	-0.967653	0
219	pplu	76.7464	-0.976674	0
220	pplu	76.7798	-0.973472	0
221	pplu	76.8132	-0.978649	0
222	pplu	76.8466	-0.884824	0
223	pplu	76.8799	-0.842279	0
224	pplu	76.9131	-0.96182	0
225	pplu	76.9466	-0.91537	0
226	pplu	76.98	-0.935438	0
227	pplu	77.0133	-0.983624	0
228	pplu	77.0468	-1.01334	0
229	pplu	77.0803	-1.03923	0
230	pplu	77.1137	-0.938513	0
231	pplu	77.147	-0.897251	0
232	pplu	77.1805	-0.873644	0
233	pplu	77.2141	-0.846649	0
234	pplu	77.2475	-0.864113	0
235	pplu	77.2809	-0.824696	0
236	pplu	77.3146	-0.758359	0
237	pplu	77.3481	-0.786985	0
238	pplu	77.3816	-0.819977	0
239	pplu	77.4152	-0.751477	0
240	pplu	77.4489	-0.696589	0
241	pplu	77.4828	-0.72703	0
242	pplu	77.5163	-0.792873	0
243	pplu	77.5498	-0.723973	0
244	pplu	77.5833	-0.600518	0
245	pplu	77.6165	-0.533961	0
246	pplu	77.6498	-0.441019	0
247	pplu	77.6831	-0.361866	0
248	pplu	77.7164	-0.262319	0
249	pplu	77.75	-0.288834	0
250	pplu	77.7833	-0.368485	0
251	pplu	77.817	-0.407418	0
252	pplu	77.8507	-0.419916	0
253	pplu	77.8843	-0.395689	0
254	pplu	77.918	-0.440549	0
255	pplu	77.9516	-0.428491	0
256	pplu	77.9853	-0.422446	0
257	pplu	78.0187	-0.382522	0
258	pplu	78.052	-0.445892	0
259	pplu	78.0859	-0.475702	0
260	pplu	78.1198	-0.451214	0
261	pplu	78.1532	-0.341318	0
262	pplu	78.1866	-0.208387	0
263	pplu	78.22	-0.210895	0
264	pplu	78.2532	-0.03271	0
265	pplu	78.2859	0.078516	0
266	pplu	78.3187	0.105618	0
267	pplu	78.3518	0.089244	0
268	pplu	78.3852	0.070652	0
269	pplu	78.4183	0.129057	0
270	pplu	78.452	0.081942	0
271	pplu	78.4856	0.112278	0
272	pplu	78.5193	0.238011	0
273	pplu	78.5527	0.249881	0
274	pplu	78.5863	0.21998	0
275	pplu	78.6199	0.169377	0
276	pplu	78.6534	0.166373	0
277	pplu	78.6866	0.013026	0
278	pplu	78.72	-0.19799	0
279	pplu	78.7537	-0.260816	0
280	pplu	78.7872	-0.216665	0
281	pplu	78.8205	-0.248019	0
282	pplu	78.854	-0.316556	0
283	pplu	78.8879	-0.235528	0
284	pplu	78.9216	-0.079281	0
285	pplu	78.955	-0.002489	0
286	pplu	78.9884	0.090927	0
287	pplu	79.022	0.342902	0
288	pplu	79.0554	0.512803	0
289	pplu	79.0885	0.614551	0
290	pplu	79.1218	0.653623	0
291	pplu	79.1553	0.725595	0
292	pplu	79.1887	0.674112	0
293	pplu	79.2223	0.529349	0
294	pplu	79.2559	0.487498	0
295	pplu	79.2895	0.424582	0
296	pplu	79.3228	0.409226	0
297	pplu	79.3562	0.344339	0
298	pplu	79.3894	0.31668	0
299	pplu	79.4229	0.414852	0
300	pplu	79.4561	0.472475	0
301	pplu	79.4894	0.593484	0
302	pplu	79.5231	0.665184	0
303	pplu	79.5564	0.740415	0
304	pplu	79.5901	0.855169	0
305	pplu	79.6238	0.857367	0
306	pplu	79.6574	0.89814	0
307	pplu	79.6913	0.849236	0
308	pplu	79.7249	0.87945	0
309	pplu	79.7586	0.90611	0
310	pplu	79.7922	0.888312	0
311	pplu	79.8256	0.882278	0
312	pplu	79.859	0.884133	0
313	pplu	79.892	0.993912	0
314	pplu	79.9251	1.01737	0
315	pplu	79.9581	1.01307	0
316	pplu	79.9913	1.16663	0
317	pplu	80.0247	1.34364	0
318	pplu	80.0582	1.3802	0
319	pplu	80.092	1.40245	0
320	pplu	80.1256	1.43045	0
321	pplu	80.1595	1.54649	0
322	pplu	80.1934	1.47159	0
323	pplu	80.227	1.4228	0
324	pplu	80.2606	1.58341	0
325	pplu	80.2941	1.78065	0
326	pplu	80.3276	1.89567	0
327	pplu	80.3609	1.91837	0
328	pplu	80.394	2.06796	0
329	pplu	80.4272	2.33894	0
330	pplu	80.4604	2.48183	0
331	pplu	80.4939	2.40209	0
332	pplu	80.5272	2.47837	0
333	pplu	80.5608	2.59384	0
334	pplu	80.5942	2.70036	0
335	pplu	80.6282	2.64241	0
336	pplu	80.6617	2.61987	0
337	pplu	80.6951	2.68247	0
338	pplu	80.7287	2.75441	0
339	pplu	80.7623	2.77806	0
340	pplu	80.7961	2.74277	0
341	pplu	80.8294	2.82367	0
342	pplu	80.8631	2.84287	0
343	pplu	80.8969	3.01568	0
344	pplu	80.9307	3.01402	0
345	pplu	80.9644	3.1906	0
346	pplu	80.9979	3.37334	0
347	pplu	81.0314	3.50523	0
348	pplu	81.0646	3.63124	0
349	pplu	81.0979	3.57212	0
350	pplu	81.1314	3.6776	0
351	pplu	81.1645	3.70095	0
352	pplu	81.1979	3.76718	0
353	pplu	81.2315	3.81059	0
354	pplu	81.265	3.76206	0
355	pplu	81.2983	3.98135	0
356	pplu	81.3315	4.10015	0
357	pplu	81.365	4.17538	0
358	pplu	81.3986	4.20543	0
359	pplu	81.4318	4.26821	0
360	pplu	81.465	4.48885	0
361	pplu	81.4983	4.53347	0
362	pplu	81.531	4.60175	0
363	pplu	81.564	4.68815	0
364	pplu	81.5967	4.73053	0
365	pplu	81.6297	4.78497	0
366	pplu	81.6629	4.90942	0
367	pplu	81.696	5.02984	0
368	pplu	81.7293	5.10669	0
369	pplu	81.7625	5.23789	0
370	pplu	81.7956	5.34554	0
371	pplu	81.8289	5.41262	0
372	pplu	81.862	5.43271	0
373	pplu	81.8953	5.37391	0
374	pplu	81.9288	5.45861	0
375	pplu	81.9621	5.49029	0
376	pplu	81.9957	5.53624	0
377	pplu	82.0294	5.66204	0
378	pplu	82.063	5.75039	0
379	pplu	82.0965	5.99351	0
380	pplu	82.1301	6.12725	0
381	pplu	82.1639	6.29535	0
382	pplu	82.1976	6.49121	0
383	pplu	82.231	6.54724	0
384	pplu	82.2647	6.79973	0
385	pplu	82.2981	6.94372	0
386	pplu	82.3315	6.99763	0
387	pplu	82.3647	7.05911	0
388	pplu	82.3981	7.18781	0
389	pplu	82.4317	7.41998	0
390	pplu	82.4652	7.3735	0
391	pplu	82.4989	7.41418	0
392	pplu	82.5322	7.56598	0
393	pplu	82.5655	7.63862	0
394	pplu	82.599	7.67496	0
395	pplu	82.6323	7.74307	0
396	pplu	82.6658	7.88167	0
397	pplu	82.6992	8.01118	0
398	pplu	82.7331	8.22634	0
399	pplu	82.7671	8.43224	0
400	pplu	82.8007	8.67938	0
401	pplu	82.8345	8.85457	0
402	pplu	82.8679	9.19523	0
403	pplu	82.9011	9.3731	0
404	pplu	82.9342	9.37435	0
405	pplu	82.9677	9.52422	0
406	pplu	83.0012	9.62046	0
407	pplu	83.0346	9.67149	0
408	pplu	83.0679	9.56365	0
409	pplu	83.1016	9.69405	0
410	pplu	83.1353	9.94684	0
411	pplu	83.1685	10.0942	0
412	pplu	83.2014	10.2661	0
413	pplu	83.2346	10.3956	0
414	pplu	83.2679	10.6032	0
415	pplu	83.3012	10.7762	0
416	pplu	83.3346	10.926	0
417	pplu	83.3678	11.0292	0
418	pplu	83.4013	11.0858	0
419	pplu	83.4345	11.2575	0
420	pplu	83.468	11.4745	0
421	pplu	83.5012	11.5796	0
422	pplu	83.5346	11.7533	0
423	pplu	83.5682	12.0044	0
424	pplu	83.6018	12.2545	0
425	pplu	83.6354	12.4775	0
426	pplu	83.6689	12.609	0
427	pplu	83.7028	12.7251	0
428	pplu	83.7362	12.9005	0
429	pplu	83.7698	13.0783	0
430	pplu	83.8033	13.3544	0
431	pplu	83.8368	13.5035	0
432	pplu	83.8702	13.7065	0
433	pplu	83.9036	14.0353	0
434	pplu	83.937	14.2983	0
435	pplu	83.9704	14.5427	0
436	pplu	84.0041	14.6904	0
437	pplu	84.0375	14.9476	0
438	pplu	84.0711	15.1937	0
439	pplu	84.1046	15.4159	0
440	pplu	84.1382	15.5803	0
441	pplu	84.1719	15.7251	0
442	pplu	84.2053	15.8277	0
443	pplu	84.239	16.0063	0
444	pplu	84.2723	16.1954	0
445	pplu	84.3058	16.4564	0
446	pplu	84.3391	16.7241	0
447	pplu	84.3723	16.9628	0
448	pplu	84.4056	17.3255	0
449	pplu	84.4388	17.5454	0
450	pplu	84.4726	17.7526	0
451	pplu	84.5061	17.9221	0
452	pplu	84.5397	18.1481	0
453	pplu	84.5733	18.5394	0
454	pplu	84.6069	18.803	0
455	pplu	84.6404	19.0506	0
456	pplu	84.6736	19.4023	0
457	pplu	84.7068	19.6575	0
458	pplu	84.7401	19.9195	0
459	pplu	84.7735	20.0579	0
460	pplu	84.807	20.2936	0
461	pplu	84.8406	20.6461	0
462	pplu	84.8737	20.869	0
463	pplu	84.9069	21.2372	0
464	pplu	84.9401	21.4958	0
465	pplu	84.9735	21.8678	0
466	pplu	85.0066	22.2036	0
467	pplu	85.0396	22.5439	0
468	pplu	85.073	22.8892	0
469	pplu	85.1066	23.1851	0
470	pplu	85.1398	23.5427	0
471	pplu	85.1731	23.7858	0
472	pplu	85.2065	24.0301	0
473	pplu	85.2398	24.356	0
474	pplu	85.2732	24.6206	0
475	pplu	85.3064	24.8081	0
476	pplu	85.34	25.1045	0
477	pplu	85.3734	25.4755	0
478	pplu	85.4068	25.8571	0
479	pplu	85.4405	26.2111	0
480	pplu	85.474	26.5852	0
481	pplu	85.5077	26.9669	0
482	pplu	85.5414	27.2836	0
483	pplu	85.5748	27.6378	0
484	pplu	85.6083	28.0041	0
485	pplu	85.6419	28.3349	0
486	pplu	85.6755	28.6723	0
487	pplu	85.7089	29.0847	0
488	pplu	85.7426	29.4701	0
489	pplu	85.7764	29.755	0
490	pplu	85.8102	30.1625	0
491	pplu	85.8437	30.4241	0
492	pplu	85.8773	30.8306	0
493	pplu	85.911	31.2308	0
494	pplu	85.9444	31.6141	0
495	pplu	85.978	32.0518	0
496	pplu	86.0116	32.3665	0
497	pplu	86.0451	32.8292	0
498	pplu	86.0787	33.2206	0
499	pplu	86.1122	33.6428	0
500	pplu	86.1457	34.1109	0
501	pplu	86.1792	34.5686	0
502	pplu	86.2126	34.9896	0
503	pplu	86.2462	35.397	0
504	pplu	86.2796	35.9155	0
505	pplu	86.3129	36.4436	0
506	pplu	86.3464	36.9122	0
507	pplu	86.3798	37.4327	0
508	pplu	86.4133	38.0414	0
509	pplu	86.4466	38.5643	0
510	pplu	86.4801	38.9389	0
511	pplu	86.5136	39.3677	0
512	pplu	86.5467	39.7644	0
513	pplu	86.5799	40.0953	0
514	pplu	86.6129	40.3818	0
515	pplu	86.6464	40.8804	0
516	pplu	86.6799	41.5003	0
517	pplu	86.7133	42.0279	0
518	pplu	86.7469	42.5871	0
519	pplu	86.7803	43.1542	0
520	pplu	86.8139	43.7803	0
521	pplu	86.8473	44.2645	0
522	pplu	86.8804	44.6793	0
523	pplu	86.9137	45.2319	0
524	pplu	86.9471	45.8141	0
525	pplu	86.9806	46.365	0
526	pplu	87.0139	46.9186	0
527	pplu	87.0474	47.5608	0
528	pplu	87.0811	48.1097	0
529	pplu	87.1147	48.6363	0
530	pplu	87.1484	49.1338	0
531	pplu	87.1819	49.6802	0
532	pplu	87.2155	50.1486	0
533	pplu	87.2488	50.5191	0
534	pplu	87.2824	51.0465	0
535	pplu	87.316	51.5164	0
536	pplu	87.3495	52.0546	0
537	pplu	87.3832	52.6382	0
538	pplu	87.4167	53.339	0
539	pplu	87.4503	54.0355	0
540	pplu	87.4837	54.7198	0
541	pplu	87.5171	55.4404	0
542	pplu	87.5504	56.2004	0
543	pplu	87.5839	56.8864	0
544	pplu	87.6176	57.649	0
545	pplu	87.6511	58.4478	0
546	pplu	87.6844	59.2726	0
547	pplu	87.7176	59.9315	0
548	pplu	87.7511	60.5232	0
549	pplu	87.7844	61.2623	0
550	pplu	87.8178	61.8778	0
551	pplu	87.8513	62.6022	0
552	pplu	87.8849	63.165	0
553	pplu	87.9188	63.7946	0
554	pplu	87.9523	64.639	0
555	pplu	87.9858	65.4953	0
556	pplu	88.0189	66.3217	0
557	pplu	88.0525	66.9492	0
558	pplu	88.0861	67.7243	0
559	pplu	88.1195	68.6462	0
560	pplu	88.153	69.4073	0
561	pplu	88.1866	70.0079	0
562	pplu	88.2202	70.7219	0
563	pplu	88.2533	71.5447	0
564	pplu	88.2867	72.3836	0
565	pplu	88.3199	73.1307	0
566	pplu	88.3532	73.8857	0
567	pplu	88.3864	74.7308	0
568	pplu	88.42	75.5712	0
569	pplu	88.4536	76.4633	0
570	pplu	88.4866	77.4271	0
571	pplu	88.52	78.3609	0
572	pplu	88.5534	79.3643	0
573	pplu	88.5872	80.3534	0
574	pplu	88.6206	81.2688	0
575	pplu	88.6543	82.1322	0
576	pplu	88.6882	82.948	0
577	pplu	88.7219	83.847	0
578	pplu	88.7558	84.7139	0
579	pplu	88.7891	85.5854	0
580	pplu	88.8228	86.4468	0
581	pplu	88.8566	87.3652	0
582	pplu	88.8901	88.2781	0
583	pplu	88.9236	89.081	0
584	pplu	88.9572	89.9381	0
585	pplu	88.9907	90.791	0
586	pplu	89.0244	91.7309	0
587	pplu	89.0579	92.7163	0
588	pplu	89.0916	93.6425	0
589	pplu	89.1255	94.684	0
590	pplu	89.159	95.5781	0
591	pplu	89.1929	96.4192	0
592	pplu	89.2265	97.1964	0
593	pplu	89.2599	98.01	0
594	pplu	89.2932	98.8011	0
595	pplu	89.3267	99.6267	0
596	pplu	89.3601	100.514	0
597	pplu	89.3935	101.321	0
598	pplu	89.4268	102.138	0
599	pplu	89.4604	102.851	0
600	pplu	89.4938	103.623	0
601	pplu	89.5272	104.227	0
602	pplu	89.5607	104.898	0
603	pplu	89.594	105.709	0
604	pplu	89.6274	106.519	0
605	pplu	89.661	107.171	0
606	pplu	89.6947	107.84	0
607	pplu	89.7281	108.553	0
608	pplu	89.7617	109.104	0
609	pplu	89.7952	109.674	0
610	pplu	89.8288	110.24	0
611	pplu	89.8621	110.887	0
612	pplu	89.8951	111.465	0
613	pplu	89.9282	111.938	0
614	pplu	89.9613	112.325	0
615	pplu	89.9942	112.838	0
616	pplu	90.0274	113.311	0
617	pplu	90.0606	113.807	0
618	pplu	90.0941	114.187	0
619	pplu	90.1276	114.642	0
620	pplu	90.1612	115.269	0
621	pplu	90.1948	115.585	0
622	pplu	90.2282	115.865	0
623	pplu	90.2618	116.036	0
624	pplu	90.2955	116.251	0
625	pplu	90.329	116.482	0
626	pplu	90.3622	116.606	0
627	pplu	90.3958	116.765	0
628	pplu	90.4292	116.894	0
629	pplu	90.4625	117.047	0
630	pplu	90.4957	117.237	0
631	pplu	90.5291	117.277	0
632	pplu	90.5626	117.321	0
633	pplu	90.5961	117.316	0
634	pplu	90.6296	117.314	0
635	pplu	90.6632	117.255	0
636	pplu	90.6967	117.065	0
637	pplu	90.7304	116.858	0
638	pplu	90.7642	116.601	0
639	pplu	90.7978	116.34	0
640	pplu	90.8312	116.013	0
641	pplu	90.8648	115.711	0
642	pplu	90.8985	115.388	0
643	pplu	90.9321	115.019	0
644	pplu	90.9657	114.634	0
645	pplu	90.9993	114.29	0
646	pplu	91.0332	113.853	0
647	pplu	91.0667	113.256	0
648	pplu	91.1003	112.6	0
649	pplu	91.1339	111.988	0
650	pplu	91.1673	111.296	0
651	pplu	91.2008	110.478	0
652	pplu	91.2341	109.666	0
653	pplu	91.2676	108.825	0
654	pplu	91.3009	107.986	0
655	pplu	91.3342	107.042	0
656	pplu	91.3677	106.138	0
657	pplu	91.401	105.107	0
658	pplu	91.4344	104.01	0
659	pplu	91.4678	102.922	0
660	pplu	91.5013	101.805	0
661	pplu	91.5346	100.61	0
662	pplu	91.5679	99.4149	0
663	pplu	91.6011	98.1648	0
664	pplu	91.6343	96.9178	0
665	pplu	91.6675	95.5895	0
666	pplu	91.7007	94.2094	0
667	pplu	91.7341	92.7761	0
668	pplu	91.7675	91.2236	0
669	pplu	91.8009	89.6535	0
670	pplu	91.8344	88.096	0
671	pplu	91.8678	86.5082	0
672	pplu	91.9014	84.8604	0
673	pplu	91.9348	83.0761	0
674	pplu	91.9682	81.191	0
675	pplu	92.0017	79.3071	0
676	pplu	92.0353	77.4094	0
677	pplu	92.069	75.2353	0
678	pplu	92.1024	72.9907	0
679	pplu	92.1361	70.9053	0
680	pplu	92.1698	68.7495	0
681	pplu	92.2032	66.4387	0
682	pplu	92.2365	63.9316	0
683	pplu	92.2698	61.4547	0
684	pplu	92.3031	58.8478	0
685	pplu	92.3362	55.9826	0
686	pplu	92.3694	53.0708	0
687	pplu	92.403	50.193	0
688	pplu	92.4365	47.2829	0
689	pplu	92.4701	44.2879	0
690	pplu	92.5037	41.2637	0
691	pplu	92.5375	38.1885	0
692	pplu	92.5711	35.1337	0
693	pplu	92.6046	31.9598	0
694	pplu	92.6382	28.7978	0
695	pplu	92.6717	25.7742	0
696	pplu	92.7054	22.8245	0
697	pplu	92.739	19.9653	0
698	pplu	92.7724	17.2022	0
699	pplu	92.806	14.6076	0
700	pplu	92.8395	12.2823	0
701	pplu	92.8731	10.2469	0
702	pplu	92.9066	8.48776	0
703	pplu	92.9399	7.0808	0
704	pplu	92.9735	5.87559	0
705	pplu	93.0069	5.05698	0
706	pplu	93.0404	4.28765	0
707	pplu	93.0737	3.63098	0
708	pplu	93.1072	3.20576	0
709	pplu	93.1407	2.88907	0
710	pplu	93.1743	2.6106	0
711	pplu	93.2079	2.32598	0
712	pplu	93.2413	2.14986	0
713	pplu	93.2746	2.01851	0
714	pplu	93.3079	1.82325	0
715	pplu	93.3411	1.71411	0
716	pplu	93.3744	1.58316	0
717	pplu	93.4078	1.52764	0
718	pplu	93.4411	1.4365	0
719	pplu	93.4747	1.44002	0
720	pplu	93.508	1.48303	0
721	pplu	93.5417	1.4409	0
722	pplu	93.575	1.44672	0
723	pplu	93.6084	1.32321	0
724	pplu	93.6422	1.19079	0
725	pplu	93.6755	0.963866	0
726	pplu	93.7092	0.76855	0
727	pplu	93.7428	0.622609	0
728	pplu	93.7766	0.554877	0
729	pplu	93.8104	0.516576	0
730	pplu	93.8436	0.543044	0
731	pplu	93.8774	0.593044	0
732	pplu	93.9109	0.569302	0
733	pplu	93.9443	0.545271	0
734	pplu	93.9778	0.416075	0
735	pplu	94.0112	0.315909	0
736	pplu	94.0449	0.316491	0
737	pplu	94.0783	0.300797	0
738	pplu	94.1116	0.34145	0
739	pplu	94.1451	0.360828	0
740	pplu	94.1787	0.479841	0
741	pplu	94.2121	0.476163	0
742	pplu	94.2454	0.297997	0
743	pplu	94.2789	0.22478	0
744	pplu	94.3123	0.067785	0
745	pplu	94.3458	-0.125561	0
746	pplu	94.3793	-0.230589	0
747	pplu	94.4127	-0.131732	0
748	pplu	94.4462	-0.114004	0
749	pplu	94.4796	-0.10463	0
750	pplu	94.5133	-0.085796	0
751	pplu	94.5467	-0.076332	0
752	pplu	94.5799	-0.226161	0
753	pplu	94.6135	-0.444204	0
754	pplu	94.6472	-0.459023	0
755	pplu	94.6807	-0.683981	0
756	pplu	94.7143	-0.848684	0
757	pplu	94.748	-0.85628	0
758	pplu	94.7816	-0.805744	0
759	pplu	94.8152	-0.797099	0
760	pplu	94.849	-0.853506	0
761	pplu	94.883	-0.730497	0
762	pplu	94.9164	-0.630737	0
763	pplu	94.9495	-0.762301	0
764	pplu	94.9829	-0.818947	0
765	pplu	95.0165	-0.830893	0
766	pplu	95.0497	-0.89974	0
767	pplu	95.0827	-1.0096	0
768	pplu	95.1163	-1.1391	0
769	pplu	95.1499	-1.20107	0
770	pplu	95.1835	-1.22681	0
771	pplu	95.2168	-1.25241	0
772	pplu	95.2501	-1.27052	0
773	pplu	95.2839	-1.24303	0
774	pplu	95.3175	-1.23059	0
775	pplu	95.3512	-1.19415	0
776	pplu	95.3848	-1.26291	0
777	pplu	95.4185	-1.23764	0
778	pplu	95.4522	-1.31669	0
779	pplu	95.4855	-1.45157	0
780	pplu	95.5188	-1.52378	0
781	pplu	95.552	-1.5753	0
782	pplu	95.5854	-1.58753	0
783	pplu	95.6187	-1.67664	0
784	pplu	95.652	-1.52953	0
785	pplu	95.6852	-1.45366	0
786	pplu	95.7185	-1.5124	0
787	pplu	95.7519	-1.55325	0
788	pplu	95.7852	-1.56502	0
789	pplu	95.8188	-1.61047	0
790	pplu	95.8527	-1.76552	0
791	pplu	95.8865	-1.7529	0
792	pplu	95.9202	-1.77852	0
793	pplu	95.9539	-1.7892	0
794	pplu	95.9874	-1.86092	0
795	pplu	96.021	-1.91543	0
796	pplu	96.0541	-1.82471	0
797	pplu	96.0874	-1.88955	0
798	pplu	96.1209	-1.79847	0
799	pplu	96.1543	-1.80257	0
800	pplu	96.1879	-1.77557	0
801	pplu	96.2211	-1.76286	0
802	pplu	96.2546	-1.78588	0
803	pplu	96.288	-1.71553	0
804	pplu	96.3214	-1.75175	0
805	pplu	96.355	-1.77711	0
806	pplu	96.3886	-1.72458	0
807	pplu	96.4223	-1.65893	0
808	pplu	96.4559	-1.66363	0
809	pplu	96.4895	-1.73929	0
810	pplu	96.5231	-1.79432	0
811	pplu	96.5564	-1.78633	0
812	pplu	96.5892	-1.87207	0
813	pplu	96.622	-1.94486	0
814	pplu	96.6549	-2.10346	0
815	pplu	96.688	-2.15872	0
816	pplu	96.7212	-2.09307	0
817	pplu	96.7546	-2.02507	0
818	pplu	96.788	-1.97536	0
819	pplu	96.8219	-1.96894	0
820	pplu	96.8556	-1.91664	0
821	pplu	96.8891	-1.98734	0
822	pplu	96.9225	-2.0972	0
823	pplu	96.9559	-2.21987	0
824	pplu	96.9898	-2.16278	0
825	pplu	97.0233	-2.14429	0
826	pplu	97.057	-2.15153	0
827	pplu	97.0909	-2.10967	0
828	pplu	97.1246	-2.03866	0
829	pplu	97.1585	-2.03666	0
830	pplu	97.1919	-2.15308	0
831	pplu	97.2252	-2.17885	0
832	pplu	97.2581	-2.19313	0
833	pplu	97.2914	-2.07874	0
834	pplu	97.3246	-2.12093	0
835	pplu	97.3579	-2.14144	0
836	pplu	97.3912	-2.22214	0
837	pplu	97.4248	-2.23952	0
838	pplu	97.4586	-2.2002	0
839	pplu	97.4919	-2.27396	0
840	pplu	97.5256	-2.25554	0
841	pplu	97.559	-2.16554	0
842	pplu	97.5923	-2.02755	0
843	pplu	97.6258	-1.98746	0
844	pplu	97.6591	-1.88269	0
845	pplu	97.6925	-1.82532	0
846	pplu	97.7258	-1.81577	0
847	pplu	97.7591	-1.73069	0
848	pplu	97.7925	-1.71237	0
849	pplu	97.826	-1.73471	0
850	pplu	97.8597	-1.80826	0
851	pplu	97.8935	-1.84545	0
852	pplu	97.927	-1.86463	0
853	pplu	97.9607	-1.94039	0
854	pplu	97.9946	-1.9571	0
855	pplu	98.0282	-2.05081	0
856	pplu	98.0616	-2.16356	0
857	pplu	98.0951	-2.17133	0
858	pplu	98.1288	-2.10912	0
859	pplu	98.1623	-2.16179	0
860	pplu	98.1956	-2.28803	0
861	pplu	98.2292	-2.26054	0
862	pplu	98.2624	-2.16242	0
863	pplu	98.2952	-2.23959	0
864	pplu	98.3279	-2.31185	0
865	pplu	98.3611	-2.27069	0
866	pplu	98.3942	-2.12593	0
867	pplu	98.4269	-2.08901	0
868	pplu	98.4602	-2.08367	0
869	pplu	98.4938	-1.88086	0
870	pplu	98.5272	-1.87023	0
871	pplu	98.5608	-1.93605	0
872	pplu	98.5943	-2.04808	0
873	pplu	98.6278	-2.02274	0
874	pplu	98.6616	-1.97697	0
875	pplu	98.6952	-2.09633	0
876	pplu	98.7292	-1.98863	0
877	pplu	98.7629	-1.85611	0
878	pplu	98.7965	-1.60998	0
879	pplu	98.8302	-1.56528	0
880	pplu	98.8635	-1.59492	0
881	pplu	98.8969	-1.49826	0
882	pplu	98.93	-1.50623	0
883	pplu	98.9632	-1.54062	0
884	pplu	98.9964	-1.68589	0
885	pplu	99.0296	-1.72601	0
886	pplu	99.0631	-1.70952	0
887	pplu	99.0966	-1.67326	0
888	pplu	99.1303	-1.72431	0
889	pplu	99.1639	-1.7881	0
890	pplu	99.1973	-1.70971	0
891	pplu	99.2309	-1.66223	0
892	pplu	99.2642	-1.63923	0
893	pplu	99.2978	-1.70368	0
894	pplu	99.3315	-1.74731	0
895	pplu	99.3649	-1.72266	0
896	pplu	99.3985	-1.67398	0
897	pplu	99.4321	-1.59684	0
898	pplu	99.4655	-1.6246	0
899	pplu	99.4989	-1.57221	0
900	pplu	99.5323	-1.42096	0
901	pplu	99.5657	-1.2868	0
902	pplu	99.5992	-1.24925	0
903	pplu	99.6327	-1.27424	0
904	pplu	99.6664	-1.22677	0
905	pplu	99.6999	-1.24138	0
906	pplu	99.7333	-1.23981	0
907	pplu	99.7668	-1.15221	0
908	pplu	99.8003	-1.16092	0
909	pplu	99.8337	-1.19208	0
910	pplu	99.8672	-1.21133	0
911	pplu	99.9007	-1.14796	0
912	pplu	99.934	-1.07199	0
913	pplu	99.9671	-1.08128	0
914	pplu	100	-0.988066	0
915	pplu	100.034	-0.865384	0
916	pplu	100.067	-0.800306	0
917	pplu	100.1	-0.790506	0
918	pplu	100.133	-0.809527	0
919	pplu	100.167	-0.928554	0
920	pplu	100.201	-1.02621	0
921	pplu	100.235	-0.950051	0
922	pplu	100.268	-0.867567	0
923	pplu	100.302	-0.945138	0
924	pplu	100.336	-0.976453	0
925	pplu	100.37	-0.92416	0
926	pplu	100.403	-0.921721	0
927	pplu	100.437	-0.968929	0
928	pplu	100.47	-0.997555	0
929	pplu	100.504	-0.86636	0
930	pplu	100.537	-0.805108	0
931	pplu	100.571	-0.803716	0
932	pplu	100.604	-0.765979	0
933	pplu	100.638	-0.771211	0
934	pplu	100.671	-0.72292	0
935	pplu	100.704	-0.649671	0
936	pplu	100.738	-0.524847	0
937	pplu	100.771	-0.452692	0
938	pplu	100.805	-0.497139	0
939	pplu	100.838	-0.505531	0
940	pplu	100.872	-0.509538	0
941	pplu	100.906	-0.599502	0
942	pplu	100.94	-0.687769	0
943	pplu	100.974	-0.713583	0
944	pplu	101.007	-0.712937	0
945	pplu	101.041	-0.68585	0
946	pplu	101.074	-0.573841	0
947	pplu	101.108	-0.432255	0
948	pplu	101.141	-0.398132	0
949	pplu	101.175	-0.292398	0
950	pplu	101.208	-0.163007	0
951	pplu	101.242	-0.001632	0
952	pplu	53.4324	0	1
953	pplu	53.4657	-0.137849	1
954	pplu	53.4989	-0.214206	1
955	pplu	53.5325	-0.307052	1
956	pplu	53.5659	-0.245001	1
957	pplu	53.5992	-0.231982	1
958	pplu	53.6325	-0.175364	1
959	pplu	53.6662	-0.134559	1
960	pplu	53.6999	-0.128614	1
961	pplu	53.7334	-0.101734	1
962	pplu	53.7671	-0.149465	1
963	pplu	53.8007	-0.105419	1
964	pplu	53.8342	-0.180514	1
965	pplu	53.8677	-0.199664	1
966	pplu	53.9008	-0.095336	1
967	pplu	53.9341	-0.073867	1
968	pplu	53.9672	-0.050976	1
969	pplu	54.0005	-0.063057	1
970	pplu	54.0339	0.033877	1
971	pplu	54.0673	0.052175	1
972	pplu	54.1008	-0.144218	1
973	pplu	54.1345	-0.179396	1
974	pplu	54.1682	-0.276916	1
975	pplu	54.2017	-0.237842	1
976	pplu	54.235	-0.205034	1
977	pplu	54.2683	-0.113116	1
978	pplu	54.3017	-0.003437	1
979	pplu	54.3348	-0.0214	1
980	pplu	54.3679	0.061973	1
981	pplu	54.4011	0.098785	1
982	pplu	54.4345	0.107955	1
983	pplu	54.468	0.11876	1
984	pplu	54.5015	0.055957	1
985	pplu	54.535	-0.023217	1
986	pplu	54.5687	0.066003	1
987	pplu	54.6021	-0.000425	1
988	pplu	54.6355	0.004225	1
989	pplu	54.6687	-0.056278	1
990	pplu	54.7019	-0.010597	1
991	pplu	54.7351	0.144982	1
992	pplu	54.7682	0.133018	1
993	pplu	54.8015	0.258788	1
994	pplu	54.8347	0.203191	1
995	pplu	54.8678	0.155527	1
996	pplu	54.9005	0.204177	1
997	pplu	54.9333	0.186535	1
998	pplu	54.9661	0.104842	1
999	pplu	54.9992	-0.013862	1
1000	pplu	55.0323	-0.061136	1
1001	pplu	55.0655	0.006841	1
1002	pplu	55.0991	0.053532	1
1003	pplu	55.1327	0.12442	1
1004	pplu	55.1661	0.110374	1
1005	pplu	55.1993	0.034499	1
1006	pplu	55.2325	0.128219	1
1007	pplu	55.2657	0.074315	1
1008	pplu	55.2989	-0.061343	1
1009	pplu	55.3321	-0.148526	1
1010	pplu	55.3654	-0.099179	1
1011	pplu	55.3987	-0.05916	1
1012	pplu	55.4319	-0.115076	1
1013	pplu	55.4657	-0.067246	1
1014	pplu	55.499	0.008102	1
1015	pplu	55.5326	-0.044213	1
1016	pplu	55.5659	-0.03724	1
1017	pplu	55.5996	-0.053052	1
1018	pplu	55.633	-0.151087	1
1019	pplu	55.6663	-0.21273	1
1020	pplu	55.6998	-0.249451	1
1021	pplu	55.7331	-0.259195	1
1022	pplu	55.7665	-0.384749	1
1023	pplu	55.7998	-0.416665	1
1024	pplu	55.8335	-0.350903	1
1025	pplu	55.867	-0.364172	1
1026	pplu	55.9004	-0.365962	1
1027	pplu	55.9336	-0.288926	1
1028	pplu	55.9671	-0.180941	1
1029	pplu	56.0005	-0.120099	1
1030	pplu	56.0337	-0.078494	1
1031	pplu	56.0671	0.052886	1
1032	pplu	56.1004	0.233473	1
1033	pplu	56.1337	0.284112	1
1034	pplu	56.1671	0.262407	1
1035	pplu	56.2006	0.385388	1
1036	pplu	56.2339	0.52222	1
1037	pplu	56.2672	0.435061	1
1038	pplu	56.3006	0.248781	1
1039	pplu	56.3341	0.06049	1
1040	pplu	56.3676	0.066502	1
1041	pplu	56.4009	-0.088329	1
1042	pplu	56.4345	-0.083777	1
1043	pplu	56.468	0.019728	1
1044	pplu	56.5016	0.098996	1
1045	pplu	56.5348	0.100519	1
1046	pplu	56.568	-0.015613	1
1047	pplu	56.6012	0.005737	1
1048	pplu	56.6344	-0.071538	1
1049	pplu	56.6676	-0.017772	1
1050	pplu	56.7008	-0.035523	1
1051	pplu	56.7342	0.068022	1
1052	pplu	56.7676	0.179184	1
1053	pplu	56.801	0.19209	1
1054	pplu	56.8341	0.157177	1
1055	pplu	56.8673	0.156576	1
1056	pplu	56.9008	0.213971	1
1057	pplu	56.934	0.237951	1
1058	pplu	56.9674	0.236957	1
1059	pplu	57.0009	0.255368	1
1060	pplu	57.0343	0.313478	1
1061	pplu	57.0679	0.176998	1
1062	pplu	57.1013	0.060554	1
1063	pplu	57.1346	0.053735	1
1064	pplu	57.1679	-0.071134	1
1065	pplu	57.2013	-0.157111	1
1066	pplu	57.2346	-0.249629	1
1067	pplu	57.268	-0.256664	1
1068	pplu	57.3014	-0.276274	1
1069	pplu	57.335	-0.369032	1
1070	pplu	57.3686	-0.256854	1
1071	pplu	57.4021	-0.319521	1
1072	pplu	57.4355	-0.428499	1
1073	pplu	57.4692	-0.495404	1
1074	pplu	57.5027	-0.530572	1
1075	pplu	57.5363	-0.502232	1
1076	pplu	57.5696	-0.503583	1
1077	pplu	57.603	-0.316444	1
1078	pplu	57.6365	-0.214848	1
1079	pplu	57.6698	-0.231875	1
1080	pplu	57.7031	-0.185587	1
1081	pplu	57.7364	-0.135503	1
1082	pplu	57.7697	-0.174861	1
1083	pplu	57.8032	-0.350132	1
1084	pplu	57.8367	-0.336525	1
1085	pplu	57.8699	-0.14116	1
1086	pplu	57.9032	-0.090962	1
1087	pplu	57.9365	-0.162893	1
1088	pplu	57.9699	-0.215255	1
1089	pplu	58.0031	-0.146276	1
1090	pplu	58.0364	-0.183856	1
1091	pplu	58.07	-0.26712	1
1092	pplu	58.1036	-0.274692	1
1093	pplu	58.1373	-0.193224	1
1094	pplu	58.1708	-0.133295	1
1095	pplu	58.204	-0.08495	1
1096	pplu	58.2374	-0.170741	1
1097	pplu	58.2703	-0.277975	1
1098	pplu	58.3033	-0.376104	1
1099	pplu	58.3362	-0.423176	1
1100	pplu	58.3694	-0.449194	1
1101	pplu	58.4025	-0.517983	1
1102	pplu	58.4357	-0.422724	1
1103	pplu	58.4692	-0.386893	1
1104	pplu	58.5023	-0.286238	1
1105	pplu	58.5357	-0.379559	1
1106	pplu	58.569	-0.393448	1
1107	pplu	58.6025	-0.303648	1
1108	pplu	58.6359	-0.26547	1
1109	pplu	58.6694	-0.236469	1
1110	pplu	58.7032	-0.309092	1
1111	pplu	58.7368	-0.21307	1
1112	pplu	58.7702	-0.240432	1
1113	pplu	58.8041	-0.350017	1
1114	pplu	58.8376	-0.407822	1
1115	pplu	58.8713	-0.507224	1
1116	pplu	58.9044	-0.469967	1
1117	pplu	58.9378	-0.455442	1
1118	pplu	58.971	-0.426996	1
1119	pplu	59.0043	-0.335825	1
1120	pplu	59.0376	-0.335172	1
1121	pplu	59.0708	-0.262725	1
1122	pplu	59.1042	-0.287166	1
1123	pplu	59.1378	-0.309707	1
1124	pplu	59.1712	-0.240546	1
1125	pplu	59.2044	-0.231133	1
1126	pplu	59.2379	-0.120601	1
1127	pplu	59.2709	-0.054409	1
1128	pplu	59.3042	0.008554	1
1129	pplu	59.3373	0.018522	1
1130	pplu	59.3704	0.080131	1
1131	pplu	59.4039	-0.010165	1
1132	pplu	59.4372	-0.154277	1
1133	pplu	59.4707	-0.256221	1
1134	pplu	59.5042	-0.347095	1
1135	pplu	59.5376	-0.338246	1
1136	pplu	59.571	-0.442248	1
1137	pplu	59.6043	-0.48237	1
1138	pplu	59.6376	-0.540669	1
1139	pplu	59.6709	-0.557959	1
1140	pplu	59.704	-0.507786	1
1141	pplu	59.7373	-0.578536	1
1142	pplu	59.7708	-0.559024	1
1143	pplu	59.8042	-0.420692	1
1144	pplu	59.8376	-0.328693	1
1145	pplu	59.8707	-0.213569	1
1146	pplu	59.904	-0.206078	1
1147	pplu	59.9372	-0.063493	1
1148	pplu	59.9704	-0.05471	1
1149	pplu	60.0034	-0.08998	1
1150	pplu	60.0364	-0.071156	1
1151	pplu	60.0696	-0.079726	1
1152	pplu	60.1027	-0.054206	1
1153	pplu	60.1361	-0.090158	1
1154	pplu	60.1696	-0.132354	1
1155	pplu	60.2031	-0.24404	1
1156	pplu	60.2366	-0.22709	1
1157	pplu	60.2704	-0.175985	1
1158	pplu	60.304	-0.174411	1
1159	pplu	60.3373	-0.239561	1
1160	pplu	60.3704	-0.267802	1
1161	pplu	60.4035	-0.181543	1
1162	pplu	60.4368	-0.136614	1
1163	pplu	60.4699	-0.176243	1
1164	pplu	60.5032	-0.236513	1
1165	pplu	60.5366	-0.313745	1
1166	pplu	60.5702	-0.277504	1
1167	pplu	60.6035	-0.418902	1
1168	pplu	60.6371	-0.48055	1
1169	pplu	60.6706	-0.529998	1
1170	pplu	60.7041	-0.535632	1
1171	pplu	60.7377	-0.449624	1
1172	pplu	60.7709	-0.465925	1
1173	pplu	60.8047	-0.331271	1
1174	pplu	60.8382	-0.279772	1
1175	pplu	60.8718	-0.290513	1
1176	pplu	60.9054	-0.213626	1
1177	pplu	60.9389	-0.154283	1
1178	pplu	60.9724	-0.086279	1
1179	pplu	61.0056	-0.14106	1
1180	pplu	61.0389	-0.17262	1
1181	pplu	61.0721	-0.135327	1
1182	pplu	61.105	-0.217519	1
1183	pplu	61.1385	-0.249426	1
1184	pplu	61.1717	-0.26715	1
1185	pplu	61.2051	-0.225806	1
1186	pplu	61.2385	-0.311124	1
1187	pplu	61.2718	-0.397044	1
1188	pplu	61.3053	-0.441167	1
1189	pplu	61.3384	-0.555372	1
1190	pplu	61.3717	-0.62227	1
1191	pplu	61.4052	-0.67184	1
1192	pplu	61.4387	-0.710845	1
1193	pplu	61.4721	-0.746302	1
1194	pplu	61.5054	-0.690878	1
1195	pplu	61.539	-0.593215	1
1196	pplu	61.573	-0.671216	1
1197	pplu	61.6068	-0.608847	1
1198	pplu	61.6404	-0.556303	1
1199	pplu	61.6739	-0.5558	1
1200	pplu	61.7077	-0.63473	1
1201	pplu	61.7412	-0.663849	1
1202	pplu	61.7745	-0.684423	1
1203	pplu	61.8076	-0.750789	1
1204	pplu	61.8411	-0.664348	1
1205	pplu	61.8747	-0.509729	1
1206	pplu	61.9077	-0.413742	1
1207	pplu	61.941	-0.482643	1
1208	pplu	61.9741	-0.442676	1
1209	pplu	62.0076	-0.550623	1
1210	pplu	62.0408	-0.706535	1
1211	pplu	62.0741	-0.825926	1
1212	pplu	62.1079	-0.857208	1
1213	pplu	62.1411	-0.726413	1
1214	pplu	62.1746	-0.656929	1
1215	pplu	62.2081	-0.569249	1
1216	pplu	62.2415	-0.506104	1
1217	pplu	62.2746	-0.402292	1
1218	pplu	62.308	-0.282397	1
1219	pplu	62.3415	-0.267951	1
1220	pplu	62.375	-0.337674	1
1221	pplu	62.4084	-0.282829	1
1222	pplu	62.4418	-0.283718	1
1223	pplu	62.4754	-0.351718	1
1224	pplu	62.5091	-0.531465	1
1225	pplu	62.5428	-0.602978	1
1226	pplu	62.5761	-0.377049	1
1227	pplu	62.6095	-0.315136	1
1228	pplu	62.643	-0.258083	1
1229	pplu	62.6768	-0.276891	1
1230	pplu	62.7101	-0.16343	1
1231	pplu	62.7435	-0.161101	1
1232	pplu	62.7772	-0.349831	1
1233	pplu	62.8108	-0.432133	1
1234	pplu	62.8445	-0.443087	1
1235	pplu	62.8777	-0.306478	1
1236	pplu	62.9111	-0.323778	1
1237	pplu	62.9444	-0.393088	1
1238	pplu	62.9777	-0.323988	1
1239	pplu	63.0111	-0.228532	1
1240	pplu	63.0444	-0.243365	1
1241	pplu	63.078	-0.366953	1
1242	pplu	63.1113	-0.357529	1
1243	pplu	63.1447	-0.242767	1
1244	pplu	63.1779	-0.185254	1
1245	pplu	63.2108	-0.233509	1
1246	pplu	63.2439	-0.188	1
1247	pplu	63.277	-0.118024	1
1248	pplu	63.3103	-0.130162	1
1249	pplu	63.3435	-0.167335	1
1250	pplu	63.3769	-0.302684	1
1251	pplu	63.4105	-0.316569	1
1252	pplu	63.4439	-0.348759	1
1253	pplu	63.4773	-0.377798	1
1254	pplu	63.5106	-0.376547	1
1255	pplu	63.5437	-0.432609	1
1256	pplu	63.5771	-0.390989	1
1257	pplu	63.6102	-0.305435	1
1258	pplu	63.6434	-0.198356	1
1259	pplu	63.6768	-0.279415	1
1260	pplu	63.71	-0.36246	1
1261	pplu	63.7435	-0.327906	1
1262	pplu	63.7768	-0.287579	1
1263	pplu	63.8104	-0.332352	1
1264	pplu	63.844	-0.403703	1
1265	pplu	63.8773	-0.390454	1
1266	pplu	63.9109	-0.366097	1
1267	pplu	63.9442	-0.33851	1
1268	pplu	63.9775	-0.267618	1
1269	pplu	64.0109	-0.264913	1
1270	pplu	64.044	-0.345484	1
1271	pplu	64.0775	-0.381774	1
1272	pplu	64.111	-0.369133	1
1273	pplu	64.1445	-0.32706	1
1274	pplu	64.178	-0.395847	1
1275	pplu	64.2115	-0.413104	1
1276	pplu	64.2451	-0.352165	1
1277	pplu	64.2786	-0.287189	1
1278	pplu	64.3119	-0.289708	1
1279	pplu	64.3453	-0.374734	1
1280	pplu	64.379	-0.467356	1
1281	pplu	64.4126	-0.366837	1
1282	pplu	64.4461	-0.32744	1
1283	pplu	64.4797	-0.253577	1
1284	pplu	64.5132	-0.303483	1
1285	pplu	64.5468	-0.247777	1
1286	pplu	64.58	-0.262767	1
1287	pplu	64.6134	-0.355583	1
1288	pplu	64.6467	-0.355932	1
1289	pplu	64.68	-0.36393	1
1290	pplu	64.7134	-0.273748	1
1291	pplu	64.7468	-0.4095	1
1292	pplu	64.7802	-0.331785	1
1293	pplu	64.8137	-0.306273	1
1294	pplu	64.8469	-0.40238	1
1295	pplu	64.8799	-0.446828	1
1296	pplu	64.9129	-0.609895	1
1297	pplu	64.946	-0.528647	1
1298	pplu	64.979	-0.607222	1
1299	pplu	65.0119	-0.691136	1
1300	pplu	65.0452	-0.688383	1
1301	pplu	65.0786	-0.801436	1
1302	pplu	65.1117	-0.713512	1
1303	pplu	65.1449	-0.722126	1
1304	pplu	65.1782	-0.627118	1
1305	pplu	65.2119	-0.640174	1
1306	pplu	65.2453	-0.522909	1
1307	pplu	65.2786	-0.42184	1
1308	pplu	65.3123	-0.444472	1
1309	pplu	65.3458	-0.456135	1
1310	pplu	65.3792	-0.569867	1
1311	pplu	65.4127	-0.578798	1
1312	pplu	65.446	-0.677199	1
1313	pplu	65.4794	-0.717965	1
1314	pplu	65.5128	-0.709216	1
1315	pplu	65.5463	-0.736734	1
1316	pplu	65.5798	-0.645832	1
1317	pplu	65.6127	-0.639941	1
1318	pplu	65.646	-0.586713	1
1319	pplu	65.6793	-0.453951	1
1320	pplu	65.7125	-0.346096	1
1321	pplu	65.7457	-0.339613	1
1322	pplu	65.779	-0.383126	1
1323	pplu	65.8126	-0.295694	1
1324	pplu	65.8459	-0.349905	1
1325	pplu	65.8794	-0.480061	1
1326	pplu	65.9127	-0.602272	1
1327	pplu	65.9461	-0.501046	1
1328	pplu	65.9793	-0.350014	1
1329	pplu	66.0126	-0.355274	1
1330	pplu	66.0459	-0.322872	1
1331	pplu	66.0793	-0.19292	1
1332	pplu	66.1127	-0.263444	1
1333	pplu	66.1458	-0.376477	1
1334	pplu	66.1791	-0.519845	1
1335	pplu	66.2124	-0.59737	1
1336	pplu	66.2457	-0.622549	1
1337	pplu	66.2789	-0.766284	1
1338	pplu	66.3122	-0.607662	1
1339	pplu	66.3456	-0.53008	1
1340	pplu	66.3792	-0.514326	1
1341	pplu	66.4126	-0.525672	1
1342	pplu	66.446	-0.541228	1
1343	pplu	66.4794	-0.548203	1
1344	pplu	66.5126	-0.606937	1
1345	pplu	66.5459	-0.650503	1
1346	pplu	66.5788	-0.642281	1
1347	pplu	66.612	-0.606018	1
1348	pplu	66.6452	-0.553229	1
1349	pplu	66.6785	-0.508023	1
1350	pplu	66.712	-0.464421	1
1351	pplu	66.7456	-0.537823	1
1352	pplu	66.7792	-0.655625	1
1353	pplu	66.8126	-0.669821	1
1354	pplu	66.8462	-0.845609	1
1355	pplu	66.8797	-0.885752	1
1356	pplu	66.9131	-0.850717	1
1357	pplu	66.9464	-0.780731	1
1358	pplu	66.9798	-0.775112	1
1359	pplu	67.0133	-0.826939	1
1360	pplu	67.0465	-0.783575	1
1361	pplu	67.0797	-0.766322	1
1362	pplu	67.1132	-0.772475	1
1363	pplu	67.1468	-0.799179	1
1364	pplu	67.18	-0.776071	1
1365	pplu	67.2133	-0.752154	1
1366	pplu	67.2466	-0.607715	1
1367	pplu	67.2799	-0.612689	1
1368	pplu	67.3131	-0.718902	1
1369	pplu	67.3464	-0.699938	1
1370	pplu	67.3799	-0.618773	1
1371	pplu	67.4133	-0.650465	1
1372	pplu	67.4471	-0.682541	1
1373	pplu	67.4805	-0.59964	1
1374	pplu	67.5139	-0.538263	1
1375	pplu	67.5473	-0.446443	1
1376	pplu	67.5809	-0.484727	1
1377	pplu	67.6143	-0.458857	1
1378	pplu	67.6476	-0.368061	1
1379	pplu	67.681	-0.389429	1
1380	pplu	67.7143	-0.324628	1
1381	pplu	67.7479	-0.294331	1
1382	pplu	67.7813	-0.231271	1
1383	pplu	67.8148	-0.137305	1
1384	pplu	67.8482	-0.156486	1
1385	pplu	67.8819	-0.173704	1
1386	pplu	67.9155	-0.339544	1
1387	pplu	67.9489	-0.514133	1
1388	pplu	67.9823	-0.661919	1
1389	pplu	68.0156	-0.807809	1
1390	pplu	68.0488	-0.934067	1
1391	pplu	68.0819	-0.92736	1
1392	pplu	68.1151	-0.862366	1
1393	pplu	68.1484	-0.706577	1
1394	pplu	68.1811	-0.568721	1
1395	pplu	68.2141	-0.380568	1
1396	pplu	68.2473	-0.210438	1
1397	pplu	68.2806	-0.19058	1
1398	pplu	68.3137	-0.181912	1
1399	pplu	68.3468	-0.304122	1
1400	pplu	68.3803	-0.379741	1
1401	pplu	68.4137	-0.444882	1
1402	pplu	68.4467	-0.622123	1
1403	pplu	68.4797	-0.693681	1
1404	pplu	68.513	-0.713427	1
1405	pplu	68.5462	-0.702141	1
1406	pplu	68.5797	-0.627584	1
1407	pplu	68.6131	-0.622605	1
1408	pplu	68.6467	-0.628926	1
1409	pplu	68.68	-0.673084	1
1410	pplu	68.7135	-0.6637	1
1411	pplu	68.7467	-0.540721	1
1412	pplu	68.7798	-0.452887	1
1413	pplu	68.813	-0.468703	1
1414	pplu	68.8466	-0.42924	1
1415	pplu	68.88	-0.354592	1
1416	pplu	68.9136	-0.332314	1
1417	pplu	68.9471	-0.400967	1
1418	pplu	68.9804	-0.562795	1
1419	pplu	69.0136	-0.630795	1
1420	pplu	69.0468	-0.637826	1
1421	pplu	69.0803	-0.597341	1
1422	pplu	69.1135	-0.602541	1
1423	pplu	69.1471	-0.611192	1
1424	pplu	69.1807	-0.522667	1
1425	pplu	69.2144	-0.464746	1
1426	pplu	69.248	-0.428396	1
1427	pplu	69.2812	-0.444465	1
1428	pplu	69.3146	-0.434587	1
1429	pplu	69.3479	-0.437269	1
1430	pplu	69.381	-0.518288	1
1431	pplu	69.4143	-0.510375	1
1432	pplu	69.4474	-0.475485	1
1433	pplu	69.4806	-0.526737	1
1434	pplu	69.5137	-0.618022	1
1435	pplu	69.5468	-0.700292	1
1436	pplu	69.5801	-0.723034	1
1437	pplu	69.6136	-0.789166	1
1438	pplu	69.6469	-0.78893	1
1439	pplu	69.6804	-0.745703	1
1440	pplu	69.7138	-0.62727	1
1441	pplu	69.7474	-0.562641	1
1442	pplu	69.7809	-0.531469	1
1443	pplu	69.8142	-0.539964	1
1444	pplu	69.8474	-0.548036	1
1445	pplu	69.8804	-0.593772	1
1446	pplu	69.9135	-0.629409	1
1447	pplu	69.9465	-0.618389	1
1448	pplu	69.9798	-0.554865	1
1449	pplu	70.0127	-0.435572	1
1450	pplu	70.0462	-0.500076	1
1451	pplu	70.0795	-0.393718	1
1452	pplu	70.1129	-0.335858	1
1453	pplu	70.1463	-0.354227	1
1454	pplu	70.1798	-0.401569	1
1455	pplu	70.2134	-0.43586	1
1456	pplu	70.2467	-0.393189	1
1457	pplu	70.2801	-0.544779	1
1458	pplu	70.3138	-0.563746	1
1459	pplu	70.3475	-0.469411	1
1460	pplu	70.3807	-0.444239	1
1461	pplu	70.414	-0.486879	1
1462	pplu	70.4473	-0.522908	1
1463	pplu	70.4806	-0.480665	1
1464	pplu	70.514	-0.481121	1
1465	pplu	70.5473	-0.501461	1
1466	pplu	70.5809	-0.467383	1
1467	pplu	70.6147	-0.433641	1
1468	pplu	70.6481	-0.396608	1
1469	pplu	70.6819	-0.322885	1
1470	pplu	70.7156	-0.393328	1
1471	pplu	70.7491	-0.520309	1
1472	pplu	70.7826	-0.611831	1
1473	pplu	70.816	-0.622051	1
1474	pplu	70.8496	-0.61451	1
1475	pplu	70.8831	-0.666274	1
1476	pplu	70.9161	-0.668199	1
1477	pplu	70.9495	-0.561289	1
1478	pplu	70.983	-0.493044	1
1479	pplu	71.0163	-0.481109	1
1480	pplu	71.0499	-0.462786	1
1481	pplu	71.0836	-0.427769	1
1482	pplu	71.1176	-0.249633	1
1483	pplu	71.1513	-0.319976	1
1484	pplu	71.1847	-0.348535	1
1485	pplu	71.2184	-0.298824	1
1486	pplu	71.2521	-0.265498	1
1487	pplu	71.2854	-0.222138	1
1488	pplu	71.3186	-0.289739	1
1489	pplu	71.3519	-0.239636	1
1490	pplu	71.3853	-0.19404	1
1491	pplu	71.4185	-0.322418	1
1492	pplu	71.4518	-0.386683	1
1493	pplu	71.485	-0.402286	1
1494	pplu	71.5183	-0.423132	1
1495	pplu	71.5512	-0.445779	1
1496	pplu	71.5842	-0.428368	1
1497	pplu	71.6174	-0.421287	1
1498	pplu	71.6503	-0.526015	1
1499	pplu	71.6835	-0.603602	1
1500	pplu	71.7169	-0.658593	1
1501	pplu	71.7502	-0.754081	1
1502	pplu	71.7836	-0.8034	1
1503	pplu	71.817	-0.724369	1
1504	pplu	71.8505	-0.658876	1
1505	pplu	71.8837	-0.697362	1
1506	pplu	71.9168	-0.638536	1
1507	pplu	71.9504	-0.503714	1
1508	pplu	71.9839	-0.458876	1
1509	pplu	72.0173	-0.421033	1
1510	pplu	72.0506	-0.330971	1
1511	pplu	72.084	-0.309777	1
1512	pplu	72.1176	-0.373471	1
1513	pplu	72.1508	-0.496023	1
1514	pplu	72.184	-0.62529	1
1515	pplu	72.2174	-0.703342	1
1516	pplu	72.2508	-0.703012	1
1517	pplu	72.2846	-0.567222	1
1518	pplu	72.318	-0.515736	1
1519	pplu	72.3518	-0.396617	1
1520	pplu	72.3856	-0.314932	1
1521	pplu	72.419	-0.312198	1
1522	pplu	72.4527	-0.398803	1
1523	pplu	72.4858	-0.537344	1
1524	pplu	72.5192	-0.572225	1
1525	pplu	72.5524	-0.623408	1
1526	pplu	72.5855	-0.597206	1
1527	pplu	72.6188	-0.529374	1
1528	pplu	72.652	-0.464116	1
1529	pplu	72.6855	-0.33766	1
1530	pplu	72.7189	-0.293405	1
1531	pplu	72.7522	-0.276275	1
1532	pplu	72.7857	-0.335928	1
1533	pplu	72.8191	-0.433483	1
1534	pplu	72.8526	-0.434695	1
1535	pplu	72.8861	-0.523485	1
1536	pplu	72.9196	-0.517488	1
1537	pplu	72.9531	-0.503998	1
1538	pplu	72.9866	-0.496906	1
1539	pplu	73.02	-0.498273	1
1540	pplu	73.0532	-0.534002	1
1541	pplu	73.0864	-0.497266	1
1542	pplu	73.1197	-0.553312	1
1543	pplu	73.1525	-0.628272	1
1544	pplu	73.1854	-0.577811	1
1545	pplu	73.2183	-0.518655	1
1546	pplu	73.2513	-0.46379	1
1547	pplu	73.2842	-0.490007	1
1548	pplu	73.3172	-0.443505	1
1549	pplu	73.3506	-0.252478	1
1550	pplu	73.384	-0.176026	1
1551	pplu	73.4176	-0.168252	1
1552	pplu	73.451	-0.127849	1
1553	pplu	73.4845	-0.117978	1
1554	pplu	73.5179	-0.124575	1
1555	pplu	73.5513	-0.214369	1
1556	pplu	73.5849	-0.284402	1
1557	pplu	73.6183	-0.278163	1
1558	pplu	73.6517	-0.355291	1
1559	pplu	73.6851	-0.326688	1
1560	pplu	73.7187	-0.315688	1
1561	pplu	73.7521	-0.346694	1
1562	pplu	73.7854	-0.364954	1
1563	pplu	73.8187	-0.392502	1
1564	pplu	73.852	-0.350497	1
1565	pplu	73.8854	-0.355639	1
1566	pplu	73.9187	-0.281726	1
1567	pplu	73.952	-0.23878	1
1568	pplu	73.9854	-0.250782	1
1569	pplu	74.0189	-0.230149	1
1570	pplu	74.0525	-0.334944	1
1571	pplu	74.086	-0.375412	1
1572	pplu	74.1192	-0.490479	1
1573	pplu	74.1529	-0.526689	1
1574	pplu	74.1864	-0.533421	1
1575	pplu	74.22	-0.587068	1
1576	pplu	74.2532	-0.470728	1
1577	pplu	74.2869	-0.392898	1
1578	pplu	74.3205	-0.296857	1
1579	pplu	74.3538	-0.290674	1
1580	pplu	74.3873	-0.309244	1
1581	pplu	74.4206	-0.294641	1
1582	pplu	74.4545	-0.318302	1
1583	pplu	74.4878	-0.357848	1
1584	pplu	74.5212	-0.374627	1
1585	pplu	74.5548	-0.482655	1
1586	pplu	74.5879	-0.395104	1
1587	pplu	74.6213	-0.39484	1
1588	pplu	74.6544	-0.459779	1
1589	pplu	74.6877	-0.495002	1
1590	pplu	74.7211	-0.604989	1
1591	pplu	74.7545	-0.530016	1
1592	pplu	74.788	-0.454415	1
1593	pplu	74.8213	-0.418004	1
1594	pplu	74.8543	-0.420954	1
1595	pplu	74.8874	-0.446569	1
1596	pplu	74.9204	-0.390158	1
1597	pplu	74.9532	-0.424286	1
1598	pplu	74.9863	-0.587736	1
1599	pplu	75.0193	-0.6055	1
1600	pplu	75.0523	-0.66052	1
1601	pplu	75.0854	-0.64821	1
1602	pplu	75.1186	-0.65455	1
1603	pplu	75.1517	-0.590267	1
1604	pplu	75.1848	-0.618023	1
1605	pplu	75.218	-0.630147	1
1606	pplu	75.2516	-0.580018	1
1607	pplu	75.285	-0.599116	1
1608	pplu	75.3184	-0.634459	1
1609	pplu	75.352	-0.537954	1
1610	pplu	75.3854	-0.382914	1
1611	pplu	75.419	-0.293025	1
1612	pplu	75.4524	-0.289154	1
1613	pplu	75.486	-0.259391	1
1614	pplu	75.5197	-0.167841	1
1615	pplu	75.5535	-0.155835	1
1616	pplu	75.5873	-0.165908	1
1617	pplu	75.6207	-0.167548	1
1618	pplu	75.6542	-0.136483	1
1619	pplu	75.6876	-0.195564	1
1620	pplu	75.7211	-0.345719	1
1621	pplu	75.7545	-0.451377	1
1622	pplu	75.7877	-0.537286	1
1623	pplu	75.821	-0.550937	1
1624	pplu	75.8546	-0.462287	1
1625	pplu	75.8881	-0.402126	1
1626	pplu	75.9215	-0.456261	1
1627	pplu	75.9548	-0.495756	1
1628	pplu	75.9884	-0.437621	1
1629	pplu	76.0224	-0.471105	1
1630	pplu	76.0561	-0.534234	1
1631	pplu	76.0895	-0.48961	1
1632	pplu	76.1233	-0.397587	1
1633	pplu	76.157	-0.268494	1
1634	pplu	76.1905	-0.22933	1
1635	pplu	76.2239	-0.305011	1
1636	pplu	76.2574	-0.395989	1
1637	pplu	76.2909	-0.496005	1
1638	pplu	76.324	-0.42153	1
1639	pplu	76.3572	-0.571031	1
1640	pplu	76.3904	-0.65353	1
1641	pplu	76.4234	-0.537953	1
1642	pplu	76.4563	-0.498406	1
1643	pplu	76.4894	-0.327302	1
1644	pplu	76.5222	-0.28833	1
1645	pplu	76.5553	-0.240347	1
1646	pplu	76.5885	-0.224084	1
1647	pplu	76.6218	-0.157432	1
1648	pplu	76.6549	-0.078355	1
1649	pplu	76.688	-0.137336	1
1650	pplu	76.7212	-0.09465	1
1651	pplu	76.7544	0	1
1652	pplu	76.7876	0.021628	1
1653	pplu	76.8208	-0.102912	1
1654	pplu	76.8541	-0.098766	1
1655	pplu	76.8872	-0.133505	1
1656	pplu	76.9206	-0.186343	1
1657	pplu	76.954	-0.16535	1
1658	pplu	76.9874	-0.067851	1
1659	pplu	77.0208	-0.082719	1
1660	pplu	77.0542	-0.167155	1
1661	pplu	77.0879	-0.188308	1
1662	pplu	77.1216	-0.192952	1
1663	pplu	77.1553	-0.277315	1
1664	pplu	77.1888	-0.374719	1
1665	pplu	77.2221	-0.374115	1
1666	pplu	77.2556	-0.288947	1
1667	pplu	77.289	-0.130804	1
1668	pplu	77.3224	0.073658	1
1669	pplu	77.3558	0.254766	1
1670	pplu	77.3891	0.414152	1
1671	pplu	77.4227	0.509236	1
1672	pplu	77.4562	0.477027	1
1673	pplu	77.4897	0.382372	1
1674	pplu	77.5231	0.133015	1
1675	pplu	77.5565	0.037925	1
1676	pplu	77.5899	0.000724	1
1677	pplu	77.6237	0.119176	1
1678	pplu	77.6572	0.246781	1
1679	pplu	77.6909	0.334461	1
1680	pplu	77.7244	0.445085	1
1681	pplu	77.758	0.484043	1
1682	pplu	77.7916	0.500457	1
1683	pplu	77.8246	0.389049	1
1684	pplu	77.8578	0.346217	1
1685	pplu	77.8912	0.435405	1
1686	pplu	77.9246	0.493267	1
1687	pplu	77.9582	0.431916	1
1688	pplu	77.9917	0.414408	1
1689	pplu	78.0252	0.409056	1
1690	pplu	78.0588	0.334421	1
1691	pplu	78.0923	0.244541	1
1692	pplu	78.1256	0.239145	1
1693	pplu	78.1585	0.312842	1
1694	pplu	78.1912	0.280873	1
1695	pplu	78.2242	0.323706	1
1696	pplu	78.2569	0.371826	1
1697	pplu	78.2895	0.324717	1
1698	pplu	78.3225	0.273393	1
1699	pplu	78.3554	0.165654	1
1700	pplu	78.3889	0.176958	1
1701	pplu	78.4221	0.200902	1
1702	pplu	78.4557	0.185377	1
1703	pplu	78.4891	0.254336	1
1704	pplu	78.5224	0.331573	1
1705	pplu	78.5562	0.432281	1
1706	pplu	78.5896	0.44784	1
1707	pplu	78.6231	0.368455	1
1708	pplu	78.6568	0.428006	1
1709	pplu	78.6903	0.378817	1
1710	pplu	78.7237	0.329015	1
1711	pplu	78.7568	0.229398	1
1712	pplu	78.7901	0.241534	1
1713	pplu	78.8233	0.295393	1
1714	pplu	78.8565	0.260874	1
1715	pplu	78.8896	0.19738	1
1716	pplu	78.923	0.297751	1
1717	pplu	78.9565	0.452566	1
1718	pplu	78.9898	0.478121	1
1719	pplu	79.0232	0.571873	1
1720	pplu	79.0566	0.750342	1
1721	pplu	79.0902	0.931647	1
1722	pplu	79.1235	0.910936	1
1723	pplu	79.157	0.96077	1
1724	pplu	79.1907	0.874565	1
1725	pplu	79.224	0.753037	1
1726	pplu	79.2575	0.705231	1
1727	pplu	79.2908	0.650312	1
1728	pplu	79.3241	0.608692	1
1729	pplu	79.3574	0.550626	1
1730	pplu	79.3907	0.731561	1
1731	pplu	79.4243	0.882305	1
1732	pplu	79.4576	0.848584	1
1733	pplu	79.4911	1.03305	1
1734	pplu	79.5248	1.15867	1
1735	pplu	79.5583	1.21872	1
1736	pplu	79.5919	1.07432	1
1737	pplu	79.6252	1.00374	1
1738	pplu	79.6587	1.01622	1
1739	pplu	79.6921	0.880049	1
1740	pplu	79.7255	0.860643	1
1741	pplu	79.759	0.863978	1
1742	pplu	79.7923	0.985871	1
1743	pplu	79.8256	1.0672	1
1744	pplu	79.8584	1.07142	1
1745	pplu	79.8915	1.03744	1
1746	pplu	79.9244	1.00882	1
1747	pplu	79.9576	0.938111	1
1748	pplu	79.9908	0.90903	1
1749	pplu	80.0241	0.958062	1
1750	pplu	80.0578	1.05146	1
1751	pplu	80.0915	1.1583	1
1752	pplu	80.1248	1.20499	1
1753	pplu	80.1578	1.26381	1
1754	pplu	80.191	1.32775	1
1755	pplu	80.2244	1.33519	1
1756	pplu	80.2576	1.35847	1
1757	pplu	80.2909	1.42701	1
1758	pplu	80.3242	1.56741	1
1759	pplu	80.3576	1.66873	1
1760	pplu	80.3912	1.80435	1
1761	pplu	80.4249	2.00431	1
1762	pplu	80.4582	2.10305	1
1763	pplu	80.4915	2.08707	1
1764	pplu	80.525	2.02507	1
1765	pplu	80.5584	2.09834	1
1766	pplu	80.5917	2.10895	1
1767	pplu	80.625	2.11537	1
1768	pplu	80.6584	2.09336	1
1769	pplu	80.692	2.07068	1
1770	pplu	80.7256	2.07435	1
1771	pplu	80.7592	1.98764	1
1772	pplu	80.7928	1.94615	1
1773	pplu	80.8263	1.91882	1
1774	pplu	80.8598	1.94664	1
1775	pplu	80.893	2.13776	1
1776	pplu	80.9264	2.27834	1
1777	pplu	80.9598	2.48061	1
1778	pplu	80.9932	2.63824	1
1779	pplu	81.0267	2.62224	1
1780	pplu	81.0604	2.62633	1
1781	pplu	81.094	2.57176	1
1782	pplu	81.1276	2.58206	1
1783	pplu	81.161	2.54636	1
1784	pplu	81.1943	2.58292	1
1785	pplu	81.2276	2.78424	1
1786	pplu	81.2607	2.88792	1
1787	pplu	81.294	2.97786	1
1788	pplu	81.3273	3.11975	1
1789	pplu	81.3607	3.28057	1
1790	pplu	81.3943	3.2849	1
1791	pplu	81.4277	3.21368	1
1792	pplu	81.4611	3.30981	1
1793	pplu	81.4944	3.33666	1
1794	pplu	81.5273	3.27191	1
1795	pplu	81.5604	3.19635	1
1796	pplu	81.5934	3.25746	1
1797	pplu	81.6264	3.28317	1
1798	pplu	81.6596	3.34248	1
1799	pplu	81.6928	3.40526	1
1800	pplu	81.7262	3.51215	1
1801	pplu	81.7594	3.71605	1
1802	pplu	81.793	3.85128	1
1803	pplu	81.8265	4.07881	1
1804	pplu	81.8598	4.18425	1
1805	pplu	81.8931	4.27041	1
1806	pplu	81.9264	4.27536	1
1807	pplu	81.9598	4.17523	1
1808	pplu	81.9928	4.13711	1
1809	pplu	82.0259	4.13745	1
1810	pplu	82.0593	4.1754	1
1811	pplu	82.0926	4.35554	1
1812	pplu	82.1259	4.46237	1
1813	pplu	82.1594	4.61461	1
1814	pplu	82.1928	4.74101	1
1815	pplu	82.2262	4.74468	1
1816	pplu	82.2595	5.01562	1
1817	pplu	82.2929	5.19047	1
1818	pplu	82.3263	5.29606	1
1819	pplu	82.3597	5.35298	1
1820	pplu	82.3932	5.34496	1
1821	pplu	82.4267	5.49687	1
1822	pplu	82.46	5.50382	1
1823	pplu	82.4934	5.52178	1
1824	pplu	82.5272	5.63648	1
1825	pplu	82.5606	5.72645	1
1826	pplu	82.5941	5.87578	1
1827	pplu	82.6276	6.0174	1
1828	pplu	82.661	6.02118	1
1829	pplu	82.6943	6.08095	1
1830	pplu	82.7274	6.17746	1
1831	pplu	82.7607	6.36427	1
1832	pplu	82.794	6.50765	1
1833	pplu	82.8273	6.60489	1
1834	pplu	82.8607	6.829	1
1835	pplu	82.8942	6.97522	1
1836	pplu	82.9278	7.01553	1
1837	pplu	82.9613	7.09671	1
1838	pplu	82.9948	7.25354	1
1839	pplu	83.0281	7.32719	1
1840	pplu	83.0618	7.35907	1
1841	pplu	83.0953	7.4599	1
1842	pplu	83.1288	7.65151	1
1843	pplu	83.1623	7.72927	1
1844	pplu	83.1955	7.82963	1
1845	pplu	83.2288	7.96599	1
1846	pplu	83.2618	8.01468	1
1847	pplu	83.2951	8.08157	1
1848	pplu	83.328	8.25843	1
1849	pplu	83.361	8.38101	1
1850	pplu	83.3944	8.44064	1
1851	pplu	83.4277	8.59431	1
1852	pplu	83.4611	8.8735	1
1853	pplu	83.4942	9.04647	1
1854	pplu	83.5276	9.11987	1
1855	pplu	83.5609	9.30711	1
1856	pplu	83.5942	9.50314	1
1857	pplu	83.6276	9.65873	1
1858	pplu	83.661	9.72473	1
1859	pplu	83.6944	9.8056	1
1860	pplu	83.7279	9.95297	1
1861	pplu	83.7612	10.0876	1
1862	pplu	83.7944	10.2905	1
1863	pplu	83.8278	10.5065	1
1864	pplu	83.8609	10.6436	1
1865	pplu	83.894	10.864	1
1866	pplu	83.9271	11.0639	1
1867	pplu	83.9606	11.2458	1
1868	pplu	83.994	11.3379	1
1869	pplu	84.0274	11.4101	1
1870	pplu	84.0609	11.5968	1
1871	pplu	84.0947	11.7661	1
1872	pplu	84.1282	12.0132	1
1873	pplu	84.1617	12.2488	1
1874	pplu	84.1954	12.4372	1
1875	pplu	84.2287	12.5834	1
1876	pplu	84.2621	12.738	1
1877	pplu	84.2955	13.0183	1
1878	pplu	84.329	13.2566	1
1879	pplu	84.3624	13.3392	1
1880	pplu	84.3958	13.5489	1
1881	pplu	84.4294	13.7343	1
1882	pplu	84.4627	13.8733	1
1883	pplu	84.4961	13.8319	1
1884	pplu	84.5293	13.853	1
1885	pplu	84.5625	14.2007	1
1886	pplu	84.5957	14.5221	1
1887	pplu	84.6288	14.7937	1
1888	pplu	84.662	15.123	1
1889	pplu	84.6953	15.4411	1
1890	pplu	84.7288	15.7009	1
1891	pplu	84.7622	15.7943	1
1892	pplu	84.7957	15.9473	1
1893	pplu	84.8293	16.2711	1
1894	pplu	84.8624	16.4924	1
1895	pplu	84.8953	16.8416	1
1896	pplu	84.9281	17.1633	1
1897	pplu	84.9611	17.532	1
1898	pplu	84.9939	17.847	1
1899	pplu	85.0268	18.0737	1
1900	pplu	85.0605	18.4101	1
1901	pplu	85.094	18.6138	1
1902	pplu	85.1273	18.7713	1
1903	pplu	85.1606	19.0172	1
1904	pplu	85.194	19.2177	1
1905	pplu	85.2271	19.4422	1
1906	pplu	85.26	19.6866	1
1907	pplu	85.293	19.9752	1
1908	pplu	85.3264	20.2505	1
1909	pplu	85.3596	20.5271	1
1910	pplu	85.3926	20.825	1
1911	pplu	85.426	21.2085	1
1912	pplu	85.4595	21.5228	1
1913	pplu	85.4928	21.9734	1
1914	pplu	85.5261	22.4365	1
1915	pplu	85.5594	22.784	1
1916	pplu	85.5928	23.1381	1
1917	pplu	85.6263	23.4105	1
1918	pplu	85.6598	23.6624	1
1919	pplu	85.6933	23.9008	1
1920	pplu	85.727	24.2093	1
1921	pplu	85.7607	24.5109	1
1922	pplu	85.7944	24.7663	1
1923	pplu	85.8281	24.99	1
1924	pplu	85.8616	25.2862	1
1925	pplu	85.8951	25.6247	1
1926	pplu	85.9286	25.9543	1
1927	pplu	85.9621	26.3552	1
1928	pplu	85.9958	26.6801	1
1929	pplu	86.0292	27.0468	1
1930	pplu	86.0629	27.4681	1
1931	pplu	86.0965	27.7829	1
1932	pplu	86.13	28.0765	1
1933	pplu	86.1634	28.318	1
1934	pplu	86.1965	28.718	1
1935	pplu	86.2298	29.0774	1
1936	pplu	86.2631	29.366	1
1937	pplu	86.2965	29.8688	1
1938	pplu	86.3298	30.3265	1
1939	pplu	86.3632	30.7644	1
1940	pplu	86.3968	31.1745	1
1941	pplu	86.43	31.6877	1
1942	pplu	86.4633	32.1152	1
1943	pplu	86.4965	32.4303	1
1944	pplu	86.5296	32.8767	1
1945	pplu	86.5625	33.3131	1
1946	pplu	86.5955	33.7461	1
1947	pplu	86.6287	34.2426	1
1948	pplu	86.6621	34.8678	1
1949	pplu	86.6953	35.4541	1
1950	pplu	86.7286	36.038	1
1951	pplu	86.7622	36.5981	1
1952	pplu	86.7955	37.1797	1
1953	pplu	86.8287	37.6191	1
1954	pplu	86.8618	38.0311	1
1955	pplu	86.8953	38.3673	1
1956	pplu	86.9287	38.7299	1
1957	pplu	86.9622	39.1902	1
1958	pplu	86.9959	39.6204	1
1959	pplu	87.0294	40.153	1
1960	pplu	87.063	40.6842	1
1961	pplu	87.0969	41.2989	1
1962	pplu	87.1303	41.8372	1
1963	pplu	87.1636	42.3591	1
1964	pplu	87.1967	42.8267	1
1965	pplu	87.23	43.269	1
1966	pplu	87.2631	43.7616	1
1967	pplu	87.2962	44.178	1
1968	pplu	87.3295	44.6826	1
1969	pplu	87.363	45.1809	1
1970	pplu	87.3967	45.7168	1
1971	pplu	87.4305	46.3111	1
1972	pplu	87.4642	46.8304	1
1973	pplu	87.4976	47.4501	1
1974	pplu	87.5312	48.0823	1
1975	pplu	87.5644	48.7539	1
1976	pplu	87.5977	49.502	1
1977	pplu	87.6309	50.1675	1
1978	pplu	87.6644	50.8291	1
1979	pplu	87.698	51.4843	1
1980	pplu	87.7315	52.0427	1
1981	pplu	87.7653	52.5043	1
1982	pplu	87.7989	52.9786	1
1983	pplu	87.8325	53.4903	1
1984	pplu	87.8659	54.0522	1
1985	pplu	87.8992	54.5293	1
1986	pplu	87.9324	55.095	1
1987	pplu	87.9656	55.8002	1
1988	pplu	87.9988	56.4585	1
1989	pplu	88.0323	57.0321	1
1990	pplu	88.0657	57.592	1
1991	pplu	88.0991	58.1746	1
1992	pplu	88.1329	58.8204	1
1993	pplu	88.1663	59.3982	1
1994	pplu	88.1995	59.8498	1
1995	pplu	88.2326	60.4264	1
1996	pplu	88.2656	61.0617	1
1997	pplu	88.2985	61.6875	1
1998	pplu	88.3313	62.1335	1
[truncated: 11,893 more rows]

## Sheet: qPCR_melting
	temperature	well	gene	value
0	20.1	A1	blank	0.0119734
1	20.7192	A1	blank	0.0119734
2	21.3384	A1	blank	0.038915
3	21.9576	A1	blank	0.0296782
4	22.5769	A1	blank	0.0345535
5	23.1961	A1	blank	0.0447934
6	23.8153	A1	blank	-0.000239011
7	24.4345	A1	blank	-0.0184968
8	25.0537	A1	blank	-0.00178991
9	25.6729	A1	blank	-0.000345297
10	26.2921	A1	blank	-0.0356412
11	26.9113	A1	blank	-0.047652
12	27.5306	A1	blank	0.0135409
13	28.1498	A1	blank	0.0435238
14	28.769	A1	blank	-0.0112437
15	29.3882	A1	blank	-0.0316114
16	30.0074	A1	blank	0.0315657
17	30.6266	A1	blank	0.0480181
18	31.2458	A1	blank	0.00937874
19	31.865	A1	blank	-0.0239741
20	32.4843	A1	blank	-0.0167643
21	33.1035	A1	blank	0.00565058
22	33.7227	A1	blank	-0.00528396
23	34.3419	A1	blank	-0.0157769
24	34.9611	A1	blank	0.00190188
25	35.5803	A1	blank	0.0133949
26	36.1995	A1	blank	0.0163858
27	36.8187	A1	blank	0.033669
28	37.438	A1	blank	0.0263156
29	38.0572	A1	blank	-0.0376252
30	38.6764	A1	blank	-0.0586023
31	39.2956	A1	blank	-0.0045342
32	39.9148	A1	blank	0.0139609
33	40.534	A1	blank	0.0211674
34	41.1532	A1	blank	0.0296499
35	41.7724	A1	blank	0.0127568
36	42.3917	A1	blank	0.00434497
37	43.0109	A1	blank	0.00812143
38	43.6301	A1	blank	0.00638243
39	44.2493	A1	blank	-0.00134947
40	44.8685	A1	blank	-0.0445731
41	45.4877	A1	blank	-0.0347901
42	46.1069	A1	blank	0.0378596
43	46.7261	A1	blank	0.00987768
44	47.3454	A1	blank	-0.0434855
45	47.9646	A1	blank	-0.0211434
46	48.5838	A1	blank	0.0401936
47	49.203	A1	blank	0.0692412
48	49.8222	A1	blank	0.0320235
49	50.4414	A1	blank	0.0102919
50	51.0606	A1	blank	0.00946459
51	51.6798	A1	blank	0.00272734
52	52.2991	A1	blank	-0.0165887
53	52.9183	A1	blank	0.0170187
54	53.5375	A1	blank	0.0577143
55	54.1567	A1	blank	0.0404857
56	54.7759	A1	blank	-0.0111639
57	55.3951	A1	blank	-0.041364
58	56.0143	A1	blank	-0.00953917
59	56.6335	A1	blank	0.0176223
60	57.2528	A1	blank	0.0542913
61	57.872	A1	blank	0.0325274
62	58.4912	A1	blank	-0.00421697
63	59.1104	A1	blank	-0.0079691
64	59.7296	A1	blank	-0.0145463
65	60.3488	A1	blank	0.0138423
66	60.968	A1	blank	0.0607177
67	61.5872	A1	blank	0.0301457
68	62.2065	A1	blank	-0.0234795
69	62.8257	A1	blank	0.00262293
70	63.4449	A1	blank	0.0356495
71	64.0641	A1	blank	0.048096
72	64.6833	A1	blank	0.0187014
73	65.3025	A1	blank	-0.00794681
74	65.9217	A1	blank	-0.00369668
75	66.5409	A1	blank	0.00899732
76	67.1602	A1	blank	0.0153259
77	67.7794	A1	blank	0.0149142
78	68.3986	A1	blank	0.0199805
79	69.0178	A1	blank	-0.0255094
80	69.637	A1	blank	-0.0133325
81	70.2562	A1	blank	-0.00598909
82	70.8754	A1	blank	-0.038211
83	71.4946	A1	blank	0.0289702
84	72.1139	A1	blank	0.0325109
85	72.7331	A1	blank	0.0209481
86	73.3523	A1	blank	0.0387971
87	73.9715	A1	blank	-0.0376878
88	74.5907	A1	blank	-0.0321129
89	75.2099	A1	blank	0.0257199
90	75.8291	A1	blank	-0.0207769
91	76.4483	A1	blank	-0.0405
92	77.0676	A1	blank	0.0148766
93	77.6868	A1	blank	0.0322221
94	78.306	A1	blank	0.0229734
95	78.9252	A1	blank	0.0250834
96	79.5444	A1	blank	0.0218905
97	80.1636	A1	blank	0.00341081
98	80.7828	A1	blank	-0.0343499
99	81.402	A1	blank	0.0140701
100	82.0213	A1	blank	0.0477294
101	82.6405	A1	blank	0.0491385
102	83.2597	A1	blank	0.0317054
103	83.8789	A1	blank	0.0366788
104	84.4981	A1	blank	0.0414111
105	85.1173	A1	blank	-0.0154573
106	85.7365	A1	blank	0.0189924
107	86.3557	A1	blank	0.0218452
108	86.975	A1	blank	0.00213371
109	87.5942	A1	blank	0.0436589
110	88.2134	A1	blank	0.0243671
111	88.8326	A1	blank	-0.00209747
112	89.4518	A1	blank	0.00175422
113	90.071	A1	blank	0.0143579
114	90.6902	A1	blank	0.0259794
115	91.3094	A1	blank	0.00820714
116	91.9287	A1	blank	-0.00430289
117	92.5479	A1	blank	0.0184694
118	93.1671	A1	blank	0.0536789
119	93.7863	A1	blank	0.00325021
120	94.4055	A1	blank	-0.0274602
121	95.0247	A1	blank	0.031017
122	95.6439	A1	blank	0.0252379
123	96.2631	A1	blank	-0.0335653
124	96.8824	A1	blank	0.00911599
125	97.5016	A1	blank	0.0986841
126	98.1208	A1	blank	0.0305915
127	98.74	A1	blank	0.0305915
128	20.1	A2	amac	6.85248
129	20.7192	A2	amac	6.85248
130	21.3384	A2	amac	2.11667
131	21.9576	A2	amac	0.306603
132	22.5769	A2	amac	0.00849862
133	23.1961	A2	amac	-0.69008
134	23.8153	A2	amac	-1.11891
135	24.4345	A2	amac	-0.786217
136	25.0537	A2	amac	-0.812406
137	25.6729	A2	amac	-1.2408
138	26.2921	A2	amac	-1.13187
139	26.9113	A2	amac	-0.769504
140	27.5306	A2	amac	-0.963591
141	28.1498	A2	amac	-1.30738
142	28.769	A2	amac	-1.49837
143	29.3882	A2	amac	-1.47956
144	30.0074	A2	amac	-1.42794
145	30.6266	A2	amac	-1.53391
146	31.2458	A2	amac	-1.42715
147	31.865	A2	amac	-1.34753
148	32.4843	A2	amac	-0.973971
149	33.1035	A2	amac	-0.526166
150	33.7227	A2	amac	-0.653549
151	34.3419	A2	amac	-0.937027
152	34.9611	A2	amac	-0.68037
153	35.5803	A2	amac	-0.175949
154	36.1995	A2	amac	0.0611674
155	36.8187	A2	amac	0.244193
156	37.438	A2	amac	0.173157
157	38.0572	A2	amac	0.103214
158	38.6764	A2	amac	0.450491
159	39.2956	A2	amac	0.88954
160	39.9148	A2	amac	0.919253
161	40.534	A2	amac	0.88421
162	41.1532	A2	amac	0.972423
163	41.7724	A2	amac	0.796678
164	42.3917	A2	amac	0.891413
165	43.0109	A2	amac	1.17353
166	43.6301	A2	amac	1.18738
167	44.2493	A2	amac	0.822761
168	44.8685	A2	amac	0.289192
169	45.4877	A2	amac	1.82031
170	46.1069	A2	amac	5.33668
171	46.7261	A2	amac	8.02388
172	47.3454	A2	amac	8.89755
173	47.9646	A2	amac	8.82987
174	48.5838	A2	amac	8.92259
175	49.203	A2	amac	9.2064
176	49.8222	A2	amac	9.58649
177	50.4414	A2	amac	9.84504
178	51.0606	A2	amac	9.67719
179	51.6798	A2	amac	9.62927
180	52.2991	A2	amac	9.95567
181	52.9183	A2	amac	10.1477
182	53.5375	A2	amac	10.1767
183	54.1567	A2	amac	10.3863
184	54.7759	A2	amac	10.3438
185	55.3951	A2	amac	10.2453
186	56.0143	A2	amac	10.5711
187	56.6335	A2	amac	10.7435
188	57.2528	A2	amac	10.755
189	57.872	A2	amac	10.7531
190	58.4912	A2	amac	10.833
191	59.1104	A2	amac	11.0777
192	59.7296	A2	amac	11.1322
193	60.3488	A2	amac	11.1565
194	60.968	A2	amac	11.5903
195	61.5872	A2	amac	11.8725
196	62.2065	A2	amac	11.8854
197	62.8257	A2	amac	12.0615
198	63.4449	A2	amac	12.5448
199	64.0641	A2	amac	13.1008
200	64.6833	A2	amac	13.529
201	65.3025	A2	amac	13.9638
202	65.9217	A2	amac	14.2206
203	66.5409	A2	amac	14.6806
204	67.1602	A2	amac	15.2356
205	67.7794	A2	amac	15.4328
206	68.3986	A2	amac	15.7948
207	69.0178	A2	amac	16.1579
208	69.637	A2	amac	16.4058
209	70.2562	A2	amac	16.8055
210	70.8754	A2	amac	16.9943
211	71.4946	A2	amac	17.0685
212	72.1139	A2	amac	17.3948
213	72.7331	A2	amac	17.9118
214	73.3523	A2	amac	18.0503
215	73.9715	A2	amac	18.0114
216	74.5907	A2	amac	18.3568
217	75.2099	A2	amac	18.8724
218	75.8291	A2	amac	19.6624
219	76.4483	A2	amac	20.6062
220	77.0676	A2	amac	21.5059
221	77.6868	A2	amac	22.4609
222	78.306	A2	amac	23.9393
223	78.9252	A2	amac	25.9483
224	79.5444	A2	amac	27.9639
225	80.1636	A2	amac	30.2553
226	80.7828	A2	amac	32.6793
227	81.402	A2	amac	34.8707
228	82.0213	A2	amac	36.9975
229	82.6405	A2	amac	38.5639
230	83.2597	A2	amac	39.139
231	83.8789	A2	amac	38.2846
232	84.4981	A2	amac	35.4506
233	85.1173	A2	amac	30.3853
234	85.7365	A2	amac	23.176
235	86.3557	A2	amac	15.0979
236	86.975	A2	amac	8.17787
237	87.5942	A2	amac	3.7784
238	88.2134	A2	amac	1.53561
239	88.8326	A2	amac	0.58095
240	89.4518	A2	amac	0.267581
241	90.071	A2	amac	0.124245
242	90.6902	A2	amac	0.0624923
243	91.3094	A2	amac	0.0671269
244	91.9287	A2	amac	0.0359064
245	92.5479	A2	amac	0.0202366
246	93.1671	A2	amac	0.0638394
247	93.7863	A2	amac	0.0274367
248	94.4055	A2	amac	-0.0125474
249	95.0247	A2	amac	0.00980558
250	95.6439	A2	amac	0.0139411
251	96.2631	A2	amac	-0.0104538
252	96.8824	A2	amac	0.00257424
253	97.5016	A2	amac	0.0720258
254	98.1208	A2	amac	0.0284264
255	98.74	A2	amac	0.0284264
256	20.1	A3	amacV14L	6.49239
257	20.7192	A3	amacV14L	6.49239
258	21.3384	A3	amacV14L	1.25774
259	21.9576	A3	amacV14L	-0.937675
260	22.5769	A3	amacV14L	-1.31299
261	23.1961	A3	amacV14L	-1.5576
262	23.8153	A3	amacV14L	-1.96469
263	24.4345	A3	amacV14L	-2.32123
264	25.0537	A3	amacV14L	-2.19365
265	25.6729	A3	amacV14L	-2.08421
266	26.2921	A3	amacV14L	-2.38244
267	26.9113	A3	amacV14L	-2.48336
268	27.5306	A3	amacV14L	-2.65336
269	28.1498	A3	amacV14L	-2.62845
270	28.769	A3	amacV14L	-2.41033
271	29.3882	A3	amacV14L	-2.3781
272	30.0074	A3	amacV14L	-2.33855
273	30.6266	A3	amacV14L	-2.61996
274	31.2458	A3	amacV14L	-2.83884
275	31.865	A3	amacV14L	-2.26103
276	32.4843	A3	amacV14L	-1.78836
277	33.1035	A3	amacV14L	-2.00112
278	33.7227	A3	amacV14L	-1.98433
279	34.3419	A3	amacV14L	-1.49044
280	34.9611	A3	amacV14L	-1.28813
281	35.5803	A3	amacV14L	-1.59139
282	36.1995	A3	amacV14L	-1.41332
283	36.8187	A3	amacV14L	-0.928334
284	37.438	A3	amacV14L	-0.8246
285	38.0572	A3	amacV14L	-0.405498
286	38.6764	A3	amacV14L	0.216166
287	39.2956	A3	amacV14L	0.223432
288	39.9148	A3	amacV14L	-0.155281
289	40.534	A3	amacV14L	-0.0427693
290	41.1532	A3	amacV14L	0.298354
291	41.7724	A3	amacV14L	0.550821
292	42.3917	A3	amacV14L	0.9488
293	43.0109	A3	amacV14L	0.831951
294	43.6301	A3	amacV14L	0.455034
295	44.2493	A3	amacV14L	0.615513
296	44.8685	A3	amacV14L	0.627064
297	45.4877	A3	amacV14L	0.169785
298	46.1069	A3	amacV14L	-0.542254
299	46.7261	A3	amacV14L	-1.2335
300	47.3454	A3	amacV14L	-0.796452
301	47.9646	A3	amacV14L	2.42039
302	48.5838	A3	amacV14L	6.55894
303	49.203	A3	amacV14L	8.31383
304	49.8222	A3	amacV14L	8.48339
305	50.4414	A3	amacV14L	8.74961
306	51.0606	A3	amacV14L	8.94761
307	51.6798	A3	amacV14L	9.02776
308	52.2991	A3	amacV14L	9.30579
309	52.9183	A3	amacV14L	9.55086
310	53.5375	A3	amacV14L	9.85864
311	54.1567	A3	amacV14L	9.77962
312	54.7759	A3	amacV14L	9.51471
313	55.3951	A3	amacV14L	9.92174
314	56.0143	A3	amacV14L	10.188
315	56.6335	A3	amacV14L	10.2244
316	57.2528	A3	amacV14L	10.6397
317	57.872	A3	amacV14L	10.9175
318	58.4912	A3	amacV14L	11.1138
319	59.1104	A3	amacV14L	11.3641
320	59.7296	A3	amacV14L	11.4976
321	60.3488	A3	amacV14L	11.7217
322	60.968	A3	amacV14L	12.2761
323	61.5872	A3	amacV14L	13.0256
324	62.2065	A3	amacV14L	13.4408
325	62.8257	A3	amacV14L	13.7216
326	63.4449	A3	amacV14L	14.2385
327	64.0641	A3	amacV14L	14.7369
328	64.6833	A3	amacV14L	15.1303
329	65.3025	A3	amacV14L	15.5236
330	65.9217	A3	amacV14L	16.0275
331	66.5409	A3	amacV14L	16.5115
332	67.1602	A3	amacV14L	16.9858
333	67.7794	A3	amacV14L	17.4819
334	68.3986	A3	amacV14L	17.8753
335	69.0178	A3	amacV14L	17.975
336	69.637	A3	amacV14L	18.1087
337	70.2562	A3	amacV14L	18.4476
338	70.8754	A3	amacV14L	18.8308
339	71.4946	A3	amacV14L	19.1884
340	72.1139	A3	amacV14L	19.6757
341	72.7331	A3	amacV14L	20.3072
342	73.3523	A3	amacV14L	20.7764
343	73.9715	A3	amacV14L	21.6113
344	74.5907	A3	amacV14L	22.7474
345	75.2099	A3	amacV14L	24.2711
346	75.8291	A3	amacV14L	26.1449
347	76.4483	A3	amacV14L	28.1077
348	77.0676	A3	amacV14L	30.7258
349	77.6868	A3	amacV14L	33.7519
350	78.306	A3	amacV14L	37.2013
351	78.9252	A3	amacV14L	41.1783
352	79.5444	A3	amacV14L	44.9946
353	80.1636	A3	amacV14L	48.7084
354	80.7828	A3	amacV14L	51.7108
355	81.402	A3	amacV14L	52.9969
356	82.0213	A3	amacV14L	52.4092
357	82.6405	A3	amacV14L	48.7031
358	83.2597	A3	amacV14L	40.9307
359	83.8789	A3	amacV14L	30.0457
360	84.4981	A3	amacV14L	18.6058
361	85.1173	A3	amacV14L	9.49149
362	85.7365	A3	amacV14L	3.96509
363	86.3557	A3	amacV14L	1.4047
364	86.975	A3	amacV14L	0.474522
365	87.5942	A3	amacV14L	0.222005
366	88.2134	A3	amacV14L	0.138244
367	88.8326	A3	amacV14L	0.0794161
368	89.4518	A3	amacV14L	0.0532392
369	90.071	A3	amacV14L	0.0484598
370	90.6902	A3	amacV14L	0.0496121
371	91.3094	A3	amacV14L	0.056703
372	91.9287	A3	amacV14L	0.0320904
373	92.5479	A3	amacV14L	0.00480926
374	93.1671	A3	amacV14L	0.0269348
375	93.7863	A3	amacV14L	-0.00695434
376	94.4055	A3	amacV14L	-0.0266545
377	95.0247	A3	amacV14L	0.0385277
378	95.6439	A3	amacV14L	0.0444799
379	96.2631	A3	amacV14L	0.0221011
380	96.8824	A3	amacV14L	0.0141288
381	97.5016	A3	amacV14L	0.0124461
382	98.1208	A3	amacV14L	-0.0331747
383	98.74	A3	amacV14L	-0.0331747
384	20.1	A4	av	5.10537
385	20.7192	A4	av	5.10537
386	21.3384	A4	av	-0.237407
387	21.9576	A4	av	-2.75691
388	22.5769	A4	av	-3.48529
389	23.1961	A4	av	-4.0039
390	23.8153	A4	av	-4.42216
391	24.4345	A4	av	-4.58722
392	25.0537	A4	av	-4.7121
393	25.6729	A4	av	-5.10656
394	26.2921	A4	av	-5.46888
395	26.9113	A4	av	-5.70435
396	27.5306	A4	av	-5.9442
397	28.1498	A4	av	-5.89128
398	28.769	A4	av	-6.07506
399	29.3882	A4	av	-6.62742
400	30.0074	A4	av	-6.59158
401	30.6266	A4	av	-6.29494
402	31.2458	A4	av	-6.54129
403	31.865	A4	av	-6.92451
404	32.4843	A4	av	-6.82515
405	33.1035	A4	av	-6.58377
406	33.7227	A4	av	-6.64928
407	34.3419	A4	av	-6.70967
408	34.9611	A4	av	-6.43986
409	35.5803	A4	av	-6.01051
410	36.1995	A4	av	-5.91667
411	36.8187	A4	av	-6.04015
412	37.438	A4	av	-6.11982
413	38.0572	A4	av	-5.94328
414	38.6764	A4	av	-5.65564
415	39.2956	A4	av	-5.46662
416	39.9148	A4	av	-5.66867
417	40.534	A4	av	-5.99537
418	41.1532	A4	av	-5.73042
419	41.7724	A4	av	-5.47523
420	42.3917	A4	av	-5.82381
421	43.0109	A4	av	-6.16906
422	43.6301	A4	av	-6.31181
423	44.2493	A4	av	-6.20668
424	44.8685	A4	av	-4.75804
425	45.4877	A4	av	-2.65296
426	46.1069	A4	av	-1.57463
427	46.7261	A4	av	-1.39629
428	47.3454	A4	av	-1.32771
429	47.9646	A4	av	-1.07146
430	48.5838	A4	av	-0.981958
431	49.203	A4	av	-0.895241
432	49.8222	A4	av	-0.679995
433	50.4414	A4	av	-0.60232
434	51.0606	A4	av	-0.303063
435	51.6798	A4	av	-0.19268
436	52.2991	A4	av	-0.315721
437	52.9183	A4	av	-0.144218
438	53.5375	A4	av	0.0976236
439	54.1567	A4	av	0.13371
440	54.7759	A4	av	0.218357
441	55.3951	A4	av	0.346207
442	56.0143	A4	av	0.544009
443	56.6335	A4	av	0.921418
444	57.2528	A4	av	1.17896
445	57.872	A4	av	1.14264
446	58.4912	A4	av	0.997245
447	59.1104	A4	av	1.29584
448	59.7296	A4	av	1.7087
449	60.3488	A4	av	1.8762
450	60.968	A4	av	2.0207
451	61.5872	A4	av	2.24041
452	62.2065	A4	av	2.33772
453	62.8257	A4	av	2.35849
454	63.4449	A4	av	2.60638
455	64.0641	A4	av	2.99286
456	64.6833	A4	av	3.16793
457	65.3025	A4	av	3.38156
458	65.9217	A4	av	3.66502
459	66.5409	A4	av	3.73698
460	67.1602	A4	av	3.98983
461	67.7794	A4	av	4.46278
462	68.3986	A4	av	4.7844
463	69.0178	A4	av	4.86521
464	69.637	A4	av	5.06403
465	70.2562	A4	av	5.55402
466	70.8754	A4	av	5.90796
467	71.4946	A4	av	6.14773
468	72.1139	A4	av	6.59105
469	72.7331	A4	av	7.18807
470	73.3523	A4	av	7.7918
471	73.9715	A4	av	8.2143
472	74.5907	A4	av	8.69197
473	75.2099	A4	av	9.43579
474	75.8291	A4	av	10.6902
475	76.4483	A4	av	11.9912
476	77.0676	A4	av	12.9305
477	77.6868	A4	av	14.007
478	78.306	A4	av	15.2684
479	78.9252	A4	av	16.5674
480	79.5444	A4	av	17.6968
481	80.1636	A4	av	18.9983
482	80.7828	A4	av	20.4794
483	81.402	A4	av	21.7943
484	82.0213	A4	av	23.4859
485	82.6405	A4	av	25.5738
486	83.2597	A4	av	28.0193
487	83.8789	A4	av	30.9567
488	84.4981	A4	av	34.6347
489	85.1173	A4	av	39.1329
490	85.7365	A4	av	44.1203
491	86.3557	A4	av	49.2364
492	86.975	A4	av	53.567
493	87.5942	A4	av	55.8148
494	88.2134	A4	av	54.4681
495	88.8326	A4	av	48.6024
496	89.4518	A4	av	38.2025
497	90.071	A4	av	25.0569
498	90.6902	A4	av	12.9946
499	91.3094	A4	av	5.29726
500	91.9287	A4	av	1.80847
501	92.5479	A4	av	0.499339
502	93.1671	A4	av	0.144068
503	93.7863	A4	av	0.0601866
504	94.4055	A4	av	0.0440319
505	95.0247	A4	av	0.0877402
506	95.6439	A4	av	0.0516763
507	96.2631	A4	av	-0.0440461
508	96.8824	A4	av	-0.0296763
509	97.5016	A4	av	0.0616803
510	98.1208	A4	av	0.0128189
511	98.74	A4	av	0.0128189
512	20.1	A5	pplu	24.6255
513	20.7192	A5	pplu	24.6255
514	21.3384	A5	pplu	23.0683
515	21.9576	A5	pplu	20.6267
516	22.5769	A5	pplu	18.2463
517	23.1961	A5	pplu	16.708
518	23.8153	A5	pplu	15.7213
519	24.4345	A5	pplu	15.2623
520	25.0537	A5	pplu	14.9929
521	25.6729	A5	pplu	14.2275
522	26.2921	A5	pplu	13.6827
523	26.9113	A5	pplu	13.69
524	27.5306	A5	pplu	14.1327
525	28.1498	A5	pplu	14.2742
526	28.769	A5	pplu	14.2186
527	29.3882	A5	pplu	14.7777
528	30.0074	A5	pplu	15.5653
529	30.6266	A5	pplu	15.722
530	31.2458	A5	pplu	15.7558
531	31.865	A5	pplu	17.0545
532	32.4843	A5	pplu	18.6776
533	33.1035	A5	pplu	20.124
534	33.7227	A5	pplu	21.3888
535	34.3419	A5	pplu	21.2937
536	34.9611	A5	pplu	21.7532
537	35.5803	A5	pplu	23.8874
538	36.1995	A5	pplu	25.5372
539	36.8187	A5	pplu	26.5267
540	37.438	A5	pplu	26.9216
541	38.0572	A5	pplu	27.5656
542	38.6764	A5	pplu	29.3541
543	39.2956	A5	pplu	30.2073
544	39.9148	A5	pplu	30.0294
545	40.534	A5	pplu	30.2744
546	41.1532	A5	pplu	30.7492
547	41.7724	A5	pplu	30.2941
548	42.3917	A5	pplu	29.1172
549	43.0109	A5	pplu	27.9968
550	43.6301	A5	pplu	26.3455
551	44.2493	A5	pplu	24.4132
552	44.8685	A5	pplu	23.1356
553	45.4877	A5	pplu	24.1972
554	46.1069	A5	pplu	27.5287
555	46.7261	A5	pplu	29.5534
556	47.3454	A5	pplu	29.0702
557	47.9646	A5	pplu	27.9549
558	48.5838	A5	pplu	27.1542
559	49.203	A5	pplu	26.6593
560	49.8222	A5	pplu	26.4363
561	50.4414	A5	pplu	26.0098
562	51.0606	A5	pplu	25.4821
563	51.6798	A5	pplu	25.1743
564	52.2991	A5	pplu	25.117
565	52.9183	A5	pplu	25.2322
566	53.5375	A5	pplu	24.7587
567	54.1567	A5	pplu	24.0367
568	54.7759	A5	pplu	24.0373
569	55.3951	A5	pplu	24.2816
570	56.0143	A5	pplu	23.8615
571	56.6335	A5	pplu	23.3356
572	57.2528	A5	pplu	23.5257
573	57.872	A5	pplu	23.7127
574	58.4912	A5	pplu	23.3299
575	59.1104	A5	pplu	22.7521
576	59.7296	A5	pplu	22.5502
577	60.3488	A5	pplu	22.6516
578	60.968	A5	pplu	22.7705
579	61.5872	A5	pplu	22.6717
580	62.2065	A5	pplu	22.4284
581	62.8257	A5	pplu	22.4775
582	63.4449	A5	pplu	22.555
583	64.0641	A5	pplu	22.5883
584	64.6833	A5	pplu	22.8565
585	65.3025	A5	pplu	23.2123
586	65.9217	A5	pplu	23.3429
587	66.5409	A5	pplu	23.7661
588	67.1602	A5	pplu	24.3459
589	67.7794	A5	pplu	24.5911
590	68.3986	A5	pplu	24.7989
591	69.0178	A5	pplu	24.934
592	69.637	A5	pplu	25.1898
593	70.2562	A5	pplu	25.5246
594	70.8754	A5	pplu	25.8396
595	71.4946	A5	pplu	26.215
596	72.1139	A5	pplu	26.3993
597	72.7331	A5	pplu	26.5291
598	73.3523	A5	pplu	26.4947
599	73.9715	A5	pplu	26.4964
600	74.5907	A5	pplu	26.6691
601	75.2099	A5	pplu	26.713
602	75.8291	A5	pplu	26.604
603	76.4483	A5	pplu	26.4746
604	77.0676	A5	pplu	26.3716
605	77.6868	A5	pplu	25.9894
606	78.306	A5	pplu	25.6009
607	78.9252	A5	pplu	25.3848
608	79.5444	A5	pplu	24.9333
609	80.1636	A5	pplu	24.5463
610	80.7828	A5	pplu	24.182
611	81.402	A5	pplu	23.6187
612	82.0213	A5	pplu	23.1307
613	82.6405	A5	pplu	22.5809
614	83.2597	A5	pplu	22.0924
615	83.8789	A5	pplu	21.6146
616	84.4981	A5	pplu	21.0762
617	85.1173	A5	pplu	20.5725
618	85.7365	A5	pplu	19.9501
619	86.3557	A5	pplu	19.0999
620	86.975	A5	pplu	17.9257
621	87.5942	A5	pplu	16.1758
622	88.2134	A5	pplu	13.5259
623	88.8326	A5	pplu	9.86384
624	89.4518	A5	pplu	5.54843
625	90.071	A5	pplu	1.97983
626	90.6902	A5	pplu	0.331937
627	91.3094	A5	pplu	0.0350431
628	91.9287	A5	pplu	0.05098
629	92.5479	A5	pplu	0.0375036
630	93.1671	A5	pplu	0.0298742
631	93.7863	A5	pplu	0.015751
632	94.4055	A5	pplu	-0.00473661
633	95.0247	A5	pplu	-0.00758678
634	95.6439	A5	pplu	-0.00319704
635	96.2631	A5	pplu	0.0255591
636	96.8824	A5	pplu	0.0343149
637	97.5016	A5	pplu	0.0584836
638	98.1208	A5	pplu	0.00363702
639	98.74	A5	pplu	0.00363702
640	20.1	A6	cgre	17.825
641	20.7192	A6	cgre	17.825
642	21.3384	A6	cgre	5.50687
643	21.9576	A6	cgre	-0.673011
644	22.5769	A6	cgre	-2.18076
645	23.1961	A6	cgre	-3.32888
646	23.8153	A6	cgre	-5.15706
647	24.4345	A6	cgre	-7.11695
648	25.0537	A6	cgre	-8.00609
649	25.6729	A6	cgre	-7.81101
650	26.2921	A6	cgre	-8.49893
651	26.9113	A6	cgre	-10.3294
652	27.5306	A6	cgre	-12.0313
653	28.1498	A6	cgre	-12.5584
654	28.769	A6	cgre	-13.1427
655	29.3882	A6	cgre	-14.2004
656	30.0074	A6	cgre	-14.3164
657	30.6266	A6	cgre	-14.6318
658	31.2458	A6	cgre	-15.454
659	31.865	A6	cgre	-15.652
660	32.4843	A6	cgre	-15.7317
661	33.1035	A6	cgre	-15.6507
662	33.7227	A6	cgre	-15.2402
663	34.3419	A6	cgre	-15.858
664	34.9611	A6	cgre	-16.3411
665	35.5803	A6	cgre	-16.7178
666	36.1995	A6	cgre	-17.6457
667	36.8187	A6	cgre	-17.7923
668	37.438	A6	cgre	-17.8568
669	38.0572	A6	cgre	-17.9919
670	38.6764	A6	cgre	-18.66
671	39.2956	A6	cgre	-18.8101
672	39.9148	A6	cgre	-18.8901
673	40.534	A6	cgre	-19.1754
674	41.1532	A6	cgre	-19.6883
675	41.7724	A6	cgre	-20.8948
676	42.3917	A6	cgre	-21.0179
677	43.0109	A6	cgre	-21.3249
678	43.6301	A6	cgre	-22.8944
679	44.2493	A6	cgre	-24.9057
680	44.8685	A6	cgre	-24
681	45.4877	A6	cgre	-15.8534
682	46.1069	A6	cgre	-5.19422
683	46.7261	A6	cgre	0.0923308
684	47.3454	A6	cgre	1.77337
685	47.9646	A6	cgre	2.83384
686	48.5838	A6	cgre	3.01846
687	49.203	A6	cgre	3.71135
688	49.8222	A6	cgre	4.14748
689	50.4414	A6	cgre	4.75795
690	51.0606	A6	cgre	5.80181
691	51.6798	A6	cgre	6.11852
692	52.2991	A6	cgre	6.80412
693	52.9183	A6	cgre	7.49051
694	53.5375	A6	cgre	8.40777
695	54.1567	A6	cgre	9.53794
696	54.7759	A6	cgre	10.6252
697	55.3951	A6	cgre	12.0426
698	56.0143	A6	cgre	12.7327
699	56.6335	A6	cgre	13.243
700	57.2528	A6	cgre	14.6943
701	57.872	A6	cgre	16.647
702	58.4912	A6	cgre	17.967
703	59.1104	A6	cgre	18.9969
704	59.7296	A6	cgre	21.0298
705	60.3488	A6	cgre	23.1426
706	60.968	A6	cgre	25.046
707	61.5872	A6	cgre	26.9428
708	62.2065	A6	cgre	29.1172
709	62.8257	A6	cgre	31.5785
710	63.4449	A6	cgre	35.2992
711	64.0641	A6	cgre	41.8057
712	64.6833	A6	cgre	50.014
713	65.3025	A6	cgre	59.4301
714	65.9217	A6	cgre	69.2021
715	66.5409	A6	cgre	78.2276
716	67.1602	A6	cgre	87.1161
717	67.7794	A6	cgre	98.2288
718	68.3986	A6	cgre	113.766
719	69.0178	A6	cgre	133.805
720	69.637	A6	cgre	159.813
721	70.2562	A6	cgre	194.287
722	70.8754	A6	cgre	238.226
723	71.4946	A6	cgre	290.034
724	72.1139	A6	cgre	342.813
725	72.7331	A6	cgre	382.345
726	73.3523	A6	cgre	382.84
727	73.9715	A6	cgre	322.909
728	74.5907	A6	cgre	214.021
729	75.2099	A6	cgre	102.734
730	75.8291	A6	cgre	32.5415
731	76.4483	A6	cgre	5.89386
732	77.0676	A6	cgre	0.441386
733	77.6868	A6	cgre	0.148209
734	78.306	A6	cgre	0.237276
735	78.9252	A6	cgre	0.234228
736	79.5444	A6	cgre	0.187005
737	80.1636	A6	cgre	0.166315
738	80.7828	A6	cgre	0.179516
739	81.402	A6	cgre	0.187283
740	82.0213	A6	cgre	0.188381
741	82.6405	A6	cgre	0.200066
742	83.2597	A6	cgre	0.150637
743	83.8789	A6	cgre	0.056714
744	84.4981	A6	cgre	0.0501107
745	85.1173	A6	cgre	0.0743167
746	85.7365	A6	cgre	0.0878028
747	86.3557	A6	cgre	0.0778975
748	86.975	A6	cgre	0.0337726
749	87.5942	A6	cgre	-0.00298731
750	88.2134	A6	cgre	0.0154734
751	88.8326	A6	cgre	0.0465763
752	89.4518	A6	cgre	0.00119671
753	90.071	A6	cgre	-0.0345353
754	90.6902	A6	cgre	-0.00442645
755	91.3094	A6	cgre	0.0389037
756	91.9287	A6	cgre	0.0490749
757	92.5479	A6	cgre	0.0361366
758	93.1671	A6	cgre	0.0551487
759	93.7863	A6	cgre	0.0148885
760	94.4055	A6	cgre	-0.0497106
761	95.0247	A6	cgre	-0.0256292
762	95.6439	A6	cgre	0.0158424
763	96.2631	A6	cgre	0.0172545
764	96.8824	A6	cgre	0.0410226
765	97.5016	A6	cgre	0.0509078
766	98.1208	A6	cgre	-0.0386078
767	98.74	A6	cgre	-0.0386078
1280	20.1	B1	blank	-0.0222299
1281	20.7192	B1	blank	-0.0222299
1282	21.3384	B1	blank	-0.0220095
1283	21.9576	B1	blank	0.0231537
1284	22.5769	B1	blank	0.0466432
1285	23.1961	B1	blank	0.0335582
1286	23.8153	B1	blank	0.0109929
1287	24.4345	B1	blank	0.031613
1288	25.0537	B1	blank	-0.0107145
1289	25.6729	B1	blank	-0.0683883
1290	26.2921	B1	blank	-0.026009
1291	26.9113	B1	blank	0.0396812
1292	27.5306	B1	blank	0.0192021
1293	28.1498	B1	blank	-0.0399541
1294	28.769	B1	blank	0.0250093
1295	29.3882	B1	blank	0.0701181
1296	30.0074	B1	blank	-0.00408828
1297	30.6266	B1	blank	-0.0329486
1298	31.2458	B1	blank	-0.00839977
1299	31.865	B1	blank	-0.0143269
1300	32.4843	B1	blank	-0.0169317
1301	33.1035	B1	blank	0.0108007
1302	33.7227	B1	blank	0.0402727
1303	34.3419	B1	blank	0.029898
1304	34.9611	B1	blank	-0.0069628
1305	35.5803	B1	blank	-0.0260275
1306	36.1995	B1	blank	-0.0446281
1307	36.8187	B1	blank	-0.0273478
1308	37.438	B1	blank	0.00524225
1309	38.0572	B1	blank	0.00280159
1310	38.6764	B1	blank	-0.00541117
1311	39.2956	B1	blank	0.0115907
1312	39.9148	B1	blank	0.038103
1313	40.534	B1	blank	0.0376848
1314	41.1532	B1	blank	0.0117064
1315	41.7724	B1	blank	-0.0213453
1316	42.3917	B1	blank	-0.0385935
1317	43.0109	B1	blank	-0.0230853
1318	43.6301	B1	blank	-0.00527239
1319	44.2493	B1	blank	-0.0085879
1320	44.8685	B1	blank	0.00125754
1321	45.4877	B1	blank	0.0353225
1322	46.1069	B1	blank	0.054368
1323	46.7261	B1	blank	0.00722208
1324	47.3454	B1	blank	-0.0544505
1325	47.9646	B1	blank	-0.00731293
1326	48.5838	B1	blank	0.0720741
1327	49.203	B1	blank	0.0423541
1328	49.8222	B1	blank	-0.00173446
1329	50.4414	B1	blank	0.00494165
1330	51.0606	B1	blank	0.0175217
1331	51.6798	B1	blank	0.0250715
1332	52.2991	B1	blank	-0.00236917
1333	52.9183	B1	blank	-0.0126039
1334	53.5375	B1	blank	0.0230973
1335	54.1567	B1	blank	0.0100971
1336	54.7759	B1	blank	-0.0126934
1337	55.3951	B1	blank	0.0103002
1338	56.0143	B1	blank	0.00641238
1339	56.6335	B1	blank	0.0179525
1340	57.2528	B1	blank	0.0452018
1341	57.872	B1	blank	0.0378765
1342	58.4912	B1	blank	0.000953736
1343	59.1104	B1	blank	0.012734
1344	59.7296	B1	blank	0.0348987
1345	60.3488	B1	blank	-0.0119921
1346	60.968	B1	blank	-0.00177566
1347	61.5872	B1	blank	0.0245154
1348	62.2065	B1	blank	0.00298077
1349	62.8257	B1	blank	0.00818477
1350	63.4449	B1	blank	0.0258571
1351	64.0641	B1	blank	0.0440862
1352	64.6833	B1	blank	0.0338326
1353	65.3025	B1	blank	-0.0235074
1354	65.9217	B1	blank	-0.0739993
1355	66.5409	B1	blank	-0.0107134
1356	67.1602	B1	blank	0.0803598
1357	67.7794	B1	blank	0.0494589
1358	68.3986	B1	blank	-0.00123431
1359	69.0178	B1	blank	-0.00890882
1360	69.637	B1	blank	-0.0352681
1361	70.2562	B1	blank	-0.0437785
1362	70.8754	B1	blank	0.0103688
1363	71.4946	B1	blank	0.0556636
1364	72.1139	B1	blank	0.040444
1365	72.7331	B1	blank	0.00520221
1366	73.3523	B1	blank	-0.00415869
1367	73.9715	B1	blank	-0.0199924
1368	74.5907	B1	blank	-0.0175109
1369	75.2099	B1	blank	0.0223426
1370	75.8291	B1	blank	0.0031899
1371	76.4483	B1	blank	-0.00607612
1372	77.0676	B1	blank	0.0273052
1373	77.6868	B1	blank	0.00900497
1374	78.306	B1	blank	0.00905323
1375	78.9252	B1	blank	0.0335077
1376	79.5444	B1	blank	0.0466595
1377	80.1636	B1	blank	-0.012436
1378	80.7828	B1	blank	-0.0304229
1379	81.402	B1	blank	0.0340795
1380	82.0213	B1	blank	0.0233473
1381	82.6405	B1	blank	0.0300113
1382	83.2597	B1	blank	0.0519883
1383	83.8789	B1	blank	0.0360938
1384	84.4981	B1	blank	0.0215837
1385	85.1173	B1	blank	0.0187939
1386	85.7365	B1	blank	0.0182589
1387	86.3557	B1	blank	0.0211035
1388	86.975	B1	blank	0.0218074
1389	87.5942	B1	blank	-0.00346679
1390	88.2134	B1	blank	-0.00254724
1391	88.8326	B1	blank	0.0232211
1392	89.4518	B1	blank	0.0462142
1393	90.071	B1	blank	0.0487901
1394	90.6902	B1	blank	0.00389479
1395	91.3094	B1	blank	0.00419506
1396	91.9287	B1	blank	0.0265182
1397	92.5479	B1	blank	0.00094077
1398	93.1671	B1	blank	-0.00556155
1399	93.7863	B1	blank	0.0313692
1400	94.4055	B1	blank	0.0159061
1401	95.0247	B1	blank	-0.0161508
1402	95.6439	B1	blank	0.00260965
1403	96.2631	B1	blank	0.0267664
1404	96.8824	B1	blank	0.0296277
1405	97.5016	B1	blank	0.021036
1406	98.1208	B1	blank	0.00746564
1407	98.74	B1	blank	0.00746564
1408	20.1	B2	amac	6.31079
1409	20.7192	B2	amac	6.31079
1410	21.3384	B2	amac	1.69753
1411	21.9576	B2	amac	-0.748129
1412	22.5769	B2	amac	-1.35973
1413	23.1961	B2	amac	-1.17056
1414	23.8153	B2	amac	-1.00705
1415	24.4345	B2	amac	-1.11147
1416	25.0537	B2	amac	-1.08616
1417	25.6729	B2	amac	-1.03112
1418	26.2921	B2	amac	-1.26583
1419	26.9113	B2	amac	-1.38372
1420	27.5306	B2	amac	-1.53783
1421	28.1498	B2	amac	-1.72106
1422	28.769	B2	amac	-1.60422
1423	29.3882	B2	amac	-1.40298
1424	30.0074	B2	amac	-1.28339
1425	30.6266	B2	amac	-1.41909
1426	31.2458	B2	amac	-1.51617
1427	31.865	B2	amac	-1.32189
1428	32.4843	B2	amac	-1.12352
1429	33.1035	B2	amac	-0.879034
1430	33.7227	B2	amac	-0.433538
1431	34.3419	B2	amac	-0.228461
1432	34.9611	B2	amac	-0.0731547
1433	35.5803	B2	amac	0.145826
1434	36.1995	B2	amac	0.0687358
1435	36.8187	B2	amac	0.327286
1436	37.438	B2	amac	0.760076
1437	38.0572	B2	amac	0.818102
1438	38.6764	B2	amac	0.867304
1439	39.2956	B2	amac	1.15624
1440	39.9148	B2	amac	1.29962
1441	40.534	B2	amac	1.37206
1442	41.1532	B2	amac	1.65352
1443	41.7724	B2	amac	1.95208
1444	42.3917	B2	amac	2.10349
1445	43.0109	B2	amac	2.01622
1446	43.6301	B2	amac	1.80535
1447	44.2493	B2	amac	1.49448
1448	44.8685	B2	amac	1.23351
1449	45.4877	B2	amac	2.05685
1450	46.1069	B2	amac	4.57542
1451	46.7261	B2	amac	7.4027
1452	47.3454	B2	amac	8.72724
1453	47.9646	B2	amac	8.96424
1454	48.5838	B2	amac	9.3139
1455	49.203	B2	amac	9.46135
1456	49.8222	B2	amac	9.38813
1457	50.4414	B2	amac	9.81241
1458	51.0606	B2	amac	10.2288
1459	51.6798	B2	amac	10.0656
1460	52.2991	B2	amac	9.91556
1461	52.9183	B2	amac	10.1972
1462	53.5375	B2	amac	10.3839
1463	54.1567	B2	amac	10.2603
1464	54.7759	B2	amac	10.3368
1465	55.3951	B2	amac	10.7735
1466	56.0143	B2	amac	11
1467	56.6335	B2	amac	10.7577
1468	57.2528	B2	amac	10.6076
1469	57.872	B2	amac	10.8748
1470	58.4912	B2	amac	11.0263
1471	59.1104	B2	amac	10.9291
1472	59.7296	B2	amac	11.1752
1473	60.3488	B2	amac	11.5317
1474	60.968	B2	amac	11.8801
1475	61.5872	B2	amac	12.0255
1476	62.2065	B2	amac	11.8594
1477	62.8257	B2	amac	12.1019
1478	63.4449	B2	amac	12.5287
1479	64.0641	B2	amac	12.992
1480	64.6833	B2	amac	13.5459
1481	65.3025	B2	amac	13.7465
1482	65.9217	B2	amac	13.9437
1483	66.5409	B2	amac	14.514
1484	67.1602	B2	amac	15.1173
1485	67.7794	B2	amac	15.5083
1486	68.3986	B2	amac	15.7695
1487	69.0178	B2	amac	16.0297
1488	69.637	B2	amac	16.3724
1489	70.2562	B2	amac	16.7812
1490	70.8754	B2	amac	16.9396
1491	71.4946	B2	amac	17.0315
1492	72.1139	B2	amac	17.3818
1493	72.7331	B2	amac	17.7996
1494	73.3523	B2	amac	17.8768
1495	73.9715	B2	amac	18.0433
1496	74.5907	B2	amac	18.6525
1497	75.2099	B2	amac	19.0411
1498	75.8291	B2	amac	19.6813
1499	76.4483	B2	amac	20.6426
1500	77.0676	B2	amac	21.4551
1501	77.6868	B2	amac	22.5992
1502	78.306	B2	amac	24.2106
1503	78.9252	B2	amac	26.1291
1504	79.5444	B2	amac	28.2301
1505	80.1636	B2	amac	30.4785
1506	80.7828	B2	amac	32.9017
1507	81.402	B2	amac	35.1411
1508	82.0213	B2	amac	37.0763
1509	82.6405	B2	amac	38.5478
1510	83.2597	B2	amac	39.0949
1511	83.8789	B2	amac	38.0832
1512	84.4981	B2	amac	35.1526
1513	85.1173	B2	amac	29.8637
1514	85.7365	B2	amac	22.3941
1515	86.3557	B2	amac	14.3939
1516	86.975	B2	amac	7.75805
1517	87.5942	B2	amac	3.48574
1518	88.2134	B2	amac	1.38631
1519	88.8326	B2	amac	0.573329
1520	89.4518	B2	amac	0.256166
1521	90.071	B2	amac	0.133029
1522	90.6902	B2	amac	0.0741785
1523	91.3094	B2	amac	0.048106
1524	91.9287	B2	amac	0.0350593
1525	92.5479	B2	amac	0.0314086
1526	93.1671	B2	amac	0.0115092
1527	93.7863	B2	amac	0.0174242
1528	94.4055	B2	amac	0.0374683
1529	95.0247	B2	amac	0.0235457
1530	95.6439	B2	amac	-0.00436973
1531	96.2631	B2	amac	-0.0142864
1532	96.8824	B2	amac	0.0236107
1533	97.5016	B2	amac	0.0283835
1534	98.1208	B2	amac	-0.0167454
1535	98.74	B2	amac	-0.0167454
1536	20.1	B3	amacV14L	9.25711
1537	20.7192	B3	amacV14L	9.25711
1538	21.3384	B3	amacV14L	3.63797
1539	21.9576	B3	amacV14L	1.06309
1540	22.5769	B3	amacV14L	-0.30545
1541	23.1961	B3	amacV14L	-1.39806
1542	23.8153	B3	amacV14L	-1.8056
1543	24.4345	B3	amacV14L	-1.75475
1544	25.0537	B3	amacV14L	-2.05795
1545	25.6729	B3	amacV14L	-2.55019
1546	26.2921	B3	amacV14L	-3.05449
1547	26.9113	B3	amacV14L	-3.35781
1548	27.5306	B3	amacV14L	-3.46252
1549	28.1498	B3	amacV14L	-3.55809
1550	28.769	B3	amacV14L	-3.39998
1551	29.3882	B3	amacV14L	-3.29915
1552	30.0074	B3	amacV14L	-3.47975
1553	30.6266	B3	amacV14L	-3.57934
1554	31.2458	B3	amacV14L	-3.4158
1555	31.865	B3	amacV14L	-3.36943
1556	32.4843	B3	amacV14L	-3.32286
1557	33.1035	B3	amacV14L	-2.69293
1558	33.7227	B3	amacV14L	-2.05479
1559	34.3419	B3	amacV14L	-2.29141
1560	34.9611	B3	amacV14L	-2.14114
1561	35.5803	B3	amacV14L	-1.68272
1562	36.1995	B3	amacV14L	-1.73289
1563	36.8187	B3	amacV14L	-1.61066
1564	37.438	B3	amacV14L	-1.53259
1565	38.0572	B3	amacV14L	-1.5496
1566	38.6764	B3	amacV14L	-1.20974
1567	39.2956	B3	amacV14L	-1.06548
1568	39.9148	B3	amacV14L	-1.14484
1569	40.534	B3	amacV14L	-0.793192
1570	41.1532	B3	amacV14L	-0.572219
1571	41.7724	B3	amacV14L	-0.636574
1572	42.3917	B3	amacV14L	-0.725453
1573	43.0109	B3	amacV14L	-0.961208
1574	43.6301	B3	amacV14L	-1.26405
1575	44.2493	B3	amacV14L	-1.62233
1576	44.8685	B3	amacV14L	-1.62884
1577	45.4877	B3	amacV14L	0.913735
1578	46.1069	B3	amacV14L	5.05683
1579	46.7261	B3	amacV14L	7.43551
1580	47.3454	B3	amacV14L	8.42277
1581	47.9646	B3	amacV14L	8.8942
1582	48.5838	B3	amacV14L	9.25364
1583	49.203	B3	amacV14L	9.79165
1584	49.8222	B3	amacV14L	9.83263
1585	50.4414	B3	amacV14L	9.81633
1586	51.0606	B3	amacV14L	10.156
1587	51.6798	B3	amacV14L	10.2388
1588	52.2991	B3	amacV14L	10.2639
1589	52.9183	B3	amacV14L	10.5139
1590	53.5375	B3	amacV14L	10.7326
1591	54.1567	B3	amacV14L	10.587
1592	54.7759	B3	amacV14L	10.6441
1593	55.3951	B3	amacV14L	11.1088
1594	56.0143	B3	amacV14L	11.3083
1595	56.6335	B3	amacV14L	11.2304
1596	57.2528	B3	amacV14L	11.322
1597	57.872	B3	amacV14L	11.8276
1598	58.4912	B3	amacV14L	12.2901
1599	59.1104	B3	amacV14L	12.4772
1600	59.7296	B3	amacV14L	12.6659
1601	60.3488	B3	amacV14L	12.9881
1602	60.968	B3	amacV14L	13.428
1603	61.5872	B3	amacV14L	13.9444
1604	62.2065	B3	amacV14L	14.3911
1605	62.8257	B3	amacV14L	14.8242
1606	63.4449	B3	amacV14L	15.2783
1607	64.0641	B3	amacV14L	15.6649
1608	64.6833	B3	amacV14L	16.2067
1609	65.3025	B3	amacV14L	16.6729
1610	65.9217	B3	amacV14L	16.9466
1611	66.5409	B3	amacV14L	17.4793
1612	67.1602	B3	amacV14L	17.945
1613	67.7794	B3	amacV14L	18.1342
1614	68.3986	B3	amacV14L	18.5711
1615	69.0178	B3	amacV14L	19.2936
1616	69.637	B3	amacV14L	19.7168
1617	70.2562	B3	amacV14L	19.8765
1618	70.8754	B3	amacV14L	20.2122
1619	71.4946	B3	amacV14L	20.6897
1620	72.1139	B3	amacV14L	21.1683
1621	72.7331	B3	amacV14L	21.8185
1622	73.3523	B3	amacV14L	22.4756
1623	73.9715	B3	amacV14L	23.0517
1624	74.5907	B3	amacV14L	24.2447
1625	75.2099	B3	amacV14L	25.923
1626	75.8291	B3	amacV14L	27.8671
1627	76.4483	B3	amacV14L	30.0167
1628	77.0676	B3	amacV14L	32.4261
1629	77.6868	B3	amacV14L	35.4476
1630	78.306	B3	amacV14L	39.1638
1631	78.9252	B3	amacV14L	43.4521
1632	79.5444	B3	amacV14L	47.4706
1633	80.1636	B3	amacV14L	51.0313
1634	80.7828	B3	amacV14L	53.7672
1635	81.402	B3	amacV14L	54.8841
1636	82.0213	B3	amacV14L	53.8569
1637	82.6405	B3	amacV14L	49.5474
1638	83.2597	B3	amacV14L	41.206
1639	83.8789	B3	amacV14L	29.8012
1640	84.4981	B3	amacV14L	18.1465
1641	85.1173	B3	amacV14L	9.10438
1642	85.7365	B3	amacV14L	3.73793
1643	86.3557	B3	amacV14L	1.29119
1644	86.975	B3	amacV14L	0.476131
1645	87.5942	B3	amacV14L	0.222965
1646	88.2134	B3	amacV14L	0.138196
1647	88.8326	B3	amacV14L	0.114777
1648	89.4518	B3	amacV14L	0.0800202
1649	90.071	B3	amacV14L	0.0841328
1650	90.6902	B3	amacV14L	0.0531514
1651	91.3094	B3	amacV14L	0.0300724
1652	91.9287	B3	amacV14L	0.0350495
1653	92.5479	B3	amacV14L	0.0147974
1654	93.1671	B3	amacV14L	0.00828428
1655	93.7863	B3	amacV14L	0.00668407
1656	94.4055	B3	amacV14L	0.00892923
1657	95.0247	B3	amacV14L	0.0278762
1658	95.6439	B3	amacV14L	0.000357385
1659	96.2631	B3	amacV14L	-0.0373221
1660	96.8824	B3	amacV14L	0.0210839
1661	97.5016	B3	amacV14L	0.0734564
1662	98.1208	B3	amacV14L	0.0256583
1663	98.74	B3	amacV14L	0.0256583
1664	20.1	B4	av	3.36261
1665	20.7192	B4	av	3.36261
1666	21.3384	B4	av	-0.625565
1667	21.9576	B4	av	-2.48961
1668	22.5769	B4	av	-3.26047
1669	23.1961	B4	av	-3.71426
1670	23.8153	B4	av	-3.91795
1671	24.4345	B4	av	-4.06247
1672	25.0537	B4	av	-4.34827
1673	25.6729	B4	av	-4.68983
1674	26.2921	B4	av	-4.95204
1675	26.9113	B4	av	-5.0943
1676	27.5306	B4	av	-5.54784
1677	28.1498	B4	av	-6.02547
1678	28.769	B4	av	-6.08527
1679	29.3882	B4	av	-6.39467
1680	30.0074	B4	av	-6.59316
1681	30.6266	B4	av	-6.55885
1682	31.2458	B4	av	-6.69876
1683	31.865	B4	av	-6.68171
1684	32.4843	B4	av	-6.65868
1685	33.1035	B4	av	-7.12481
1686	33.7227	B4	av	-7.26954
1687	34.3419	B4	av	-7.18528
1688	34.9611	B4	av	-7.41121
1689	35.5803	B4	av	-7.45083
1690	36.1995	B4	av	-7.4552
1691	36.8187	B4	av	-7.52272
1692	37.438	B4	av	-7.53561
1693	38.0572	B4	av	-7.46367
1694	38.6764	B4	av	-7.41495
1695	39.2956	B4	av	-7.4334
1696	39.9148	B4	av	-7.73796
1697	40.534	B4	av	-7.81842
1698	41.1532	B4	av	-7.63491
1699	41.7724	B4	av	-7.89127
1700	42.3917	B4	av	-8.23479
1701	43.0109	B4	av	-8.39039
1702	43.6301	B4	av	-8.95167
1703	44.2493	B4	av	-9.77304
1704	44.8685	B4	av	-8.7571
1705	45.4877	B4	av	-5.48652
1706	46.1069	B4	av	-2.7945
1707	46.7261	B4	av	-2.10524
1708	47.3454	B4	av	-1.96491
1709	47.9646	B4	av	-1.55756
1710	48.5838	B4	av	-1.33499
1711	49.203	B4	av	-1.1331
1712	49.8222	B4	av	-0.871369
1713	50.4414	B4	av	-0.819066
1714	51.0606	B4	av	-0.606453
1715	51.6798	B4	av	-0.313778
1716	52.2991	B4	av	-0.347303
1717	52.9183	B4	av	-0.240437
1718	53.5375	B4	av	0.0848702
1719	54.1567	B4	av	0.205193
1720	54.7759	B4	av	0.224154
1721	55.3951	B4	av	0.274431
1722	56.0143	B4	av	0.482912
1723	56.6335	B4	av	0.972047
1724	57.2528	B4	av	1.30456
1725	57.872	B4	av	1.24613
1726	58.4912	B4	av	1.09705
1727	59.1104	B4	av	1.51239
1728	59.7296	B4	av	2.0404
1729	60.3488	B4	av	2.08321
1730	60.968	B4	av	2.18711
1731	61.5872	B4	av	2.35917
1732	62.2065	B4	av	2.68766
1733	62.8257	B4	av	3.04708
1734	63.4449	B4	av	3.10766
1735	64.0641	B4	av	3.128
1736	64.6833	B4	av	3.54088
1737	65.3025	B4	av	4.01006
1738	65.9217	B4	av	4.10912
1739	66.5409	B4	av	4.46887
1740	67.1602	B4	av	4.74478
1741	67.7794	B4	av	4.69575
1742	68.3986	B4	av	5.00651
1743	69.0178	B4	av	5.54034
1744	69.637	B4	av	5.98479
1745	70.2562	B4	av	6.27431
1746	70.8754	B4	av	6.6379
1747	71.4946	B4	av	7.22088
1748	72.1139	B4	av	7.63559
1749	72.7331	B4	av	7.88561
1750	73.3523	B4	av	8.50936
1751	73.9715	B4	av	9.40347
1752	74.5907	B4	av	10.1278
1753	75.2099	B4	av	11.055
1754	75.8291	B4	av	12.4399
1755	76.4483	B4	av	13.8928
1756	77.0676	B4	av	15.2012
1757	77.6868	B4	av	16.5391
1758	78.306	B4	av	18.0562
1759	78.9252	B4	av	19.6002
1760	79.5444	B4	av	21.1236
1761	80.1636	B4	av	22.6379
1762	80.7828	B4	av	24.2473
1763	81.402	B4	av	25.9628
1764	82.0213	B4	av	27.8706
1765	82.6405	B4	av	30.2911
1766	83.2597	B4	av	33.4189
1767	83.8789	B4	av	36.9525
1768	84.4981	B4	av	41.3563
1769	85.1173	B4	av	46.769
1770	85.7365	B4	av	52.691
1771	86.3557	B4	av	58.8147
1772	86.975	B4	av	63.8656
1773	87.5942	B4	av	66.1957
1774	88.2134	B4	av	64.2014
1775	88.8326	B4	av	56.567
1776	89.4518	B4	av	43.6529
1777	90.071	B4	av	28.2269
1778	90.6902	B4	av	14.5289
1779	91.3094	B4	av	5.66826
1780	91.9287	B4	av	1.5902
1781	92.5479	B4	av	0.336301
1782	93.1671	B4	av	0.121636
1783	93.7863	B4	av	0.0930166
1784	94.4055	B4	av	0.0850056
1785	95.0247	B4	av	0.0827844
1786	95.6439	B4	av	0.0373469
1787	96.2631	B4	av	-0.00411892
1788	96.8824	B4	av	-0.0252064
1789	97.5016	B4	av	0.0365553
1790	98.1208	B4	av	0.116697
1791	98.74	B4	av	0.116697
1792	20.1	B5	pplu	22.6151
1793	20.7192	B5	pplu	22.6151
1794	21.3384	B5	pplu	21.2794
1795	21.9576	B5	pplu	19.5904
1796	22.5769	B5	pplu	17.856
1797	23.1961	B5	pplu	16.1659
1798	23.8153	B5	pplu	15.3166
1799	24.4345	B5	pplu	14.7981
1800	25.0537	B5	pplu	14.3657
1801	25.6729	B5	pplu	14.3939
1802	26.2921	B5	pplu	14.7609
1803	26.9113	B5	pplu	14.3903
1804	27.5306	B5	pplu	14.1436
1805	28.1498	B5	pplu	14.6885
1806	28.769	B5	pplu	14.5518
1807	29.3882	B5	pplu	14.5891
1808	30.0074	B5	pplu	15.8207
1809	30.6266	B5	pplu	16.455
1810	31.2458	B5	pplu	16.6243
1811	31.865	B5	pplu	17.7589
1812	32.4843	B5	pplu	19.183
1813	33.1035	B5	pplu	20.372
1814	33.7227	B5	pplu	21.9369
1815	34.3419	B5	pplu	23.1765
1816	34.9611	B5	pplu	24.2482
1817	35.5803	B5	pplu	25.8516
1818	36.1995	B5	pplu	26.7111
1819	36.8187	B5	pplu	27.3598
1820	37.438	B5	pplu	28.3554
1821	38.0572	B5	pplu	29.5205
1822	38.6764	B5	pplu	30.5422
1823	39.2956	B5	pplu	31.2513
1824	39.9148	B5	pplu	31.5979
1825	40.534	B5	pplu	31.7388
1826	41.1532	B5	pplu	31.6487
1827	41.7724	B5	pplu	30.4773
1828	42.3917	B5	pplu	29.1477
1829	43.0109	B5	pplu	28.3531
1830	43.6301	B5	pplu	26.4806
1831	44.2493	B5	pplu	23.9957
1832	44.8685	B5	pplu	25.0988
1833	45.4877	B5	pplu	29.5478
1834	46.1069	B5	pplu	32.3415
1835	46.7261	B5	pplu	32.2858
1836	47.3454	B5	pplu	30.7101
1837	47.9646	B5	pplu	29.3346
1838	48.5838	B5	pplu	28.9851
1839	49.203	B5	pplu	28.1803
1840	49.8222	B5	pplu	26.7851
1841	50.4414	B5	pplu	26.2158
1842	51.0606	B5	pplu	26.4439
1843	51.6798	B5	pplu	26.1189
1844	52.2991	B5	pplu	25.8506
1845	52.9183	B5	pplu	25.6615
1846	53.5375	B5	pplu	25.2308
1847	54.1567	B5	pplu	24.8152
1848	54.7759	B5	pplu	24.7316
1849	55.3951	B5	pplu	25.056
1850	56.0143	B5	pplu	24.7911
1851	56.6335	B5	pplu	24.2408
1852	57.2528	B5	pplu	24.0807
1853	57.872	B5	pplu	24.022
1854	58.4912	B5	pplu	23.938
1855	59.1104	B5	pplu	23.8555
1856	59.7296	B5	pplu	23.5439
1857	60.3488	B5	pplu	23.5457
1858	60.968	B5	pplu	23.6336
1859	61.5872	B5	pplu	23.3408
1860	62.2065	B5	pplu	23.0873
1861	62.8257	B5	pplu	23.1517
1862	63.4449	B5	pplu	23.3542
1863	64.0641	B5	pplu	23.5204
1864	64.6833	B5	pplu	23.5613
1865	65.3025	B5	pplu	23.8716
1866	65.9217	B5	pplu	24.346
1867	66.5409	B5	pplu	24.49
1868	67.1602	B5	pplu	24.7293
1869	67.7794	B5	pplu	25.2734
1870	68.3986	B5	pplu	25.8679
1871	69.0178	B5	pplu	26.2373
1872	69.637	B5	pplu	26.5272
1873	70.2562	B5	pplu	26.7908
1874	70.8754	B5	pplu	27.3119
1875	71.4946	B5	pplu	27.8808
1876	72.1139	B5	pplu	28.1247
1877	72.7331	B5	pplu	28.2856
1878	73.3523	B5	pplu	28.2183
1879	73.9715	B5	pplu	28.3194
1880	74.5907	B5	pplu	28.6148
1881	75.2099	B5	pplu	28.6145
1882	75.8291	B5	pplu	28.3486
1883	76.4483	B5	pplu	27.9741
1884	77.0676	B5	pplu	27.7207
1885	77.6868	B5	pplu	27.5455
1886	78.306	B5	pplu	27.2045
1887	78.9252	B5	pplu	26.7285
1888	79.5444	B5	pplu	26.2165
1889	80.1636	B5	pplu	25.7968
1890	80.7828	B5	pplu	25.3263
1891	81.402	B5	pplu	24.6905
1892	82.0213	B5	pplu	24.1056
1893	82.6405	B5	pplu	23.5529
1894	83.2597	B5	pplu	23.0064
1895	83.8789	B5	pplu	22.3664
1896	84.4981	B5	pplu	21.7159
1897	85.1173	B5	pplu	21.1204
1898	85.7365	B5	pplu	20.3531
1899	86.3557	B5	pplu	19.3743
1900	86.975	B5	pplu	18.1468
1901	87.5942	B5	pplu	16.264
1902	88.2134	B5	pplu	13.4372
1903	88.8326	B5	pplu	9.54249
1904	89.4518	B5	pplu	5.1114
1905	90.071	B5	pplu	1.70325
1906	90.6902	B5	pplu	0.198352
1907	91.3094	B5	pplu	0.0110996
1908	91.9287	B5	pplu	0.0653778
1909	92.5479	B5	pplu	0.0267268
1910	93.1671	B5	pplu	0.0123273
1911	93.7863	B5	pplu	0.033515
1912	94.4055	B5	pplu	0.0225517
1913	95.0247	B5	pplu	0.00576543
1914	95.6439	B5	pplu	0.0363324
1915	96.2631	B5	pplu	0.0167763
1916	96.8824	B5	pplu	-0.00224949
1917	97.5016	B5	pplu	0.0354439
1918	98.1208	B5	pplu	0.0284251
1919	98.74	B5	pplu	0.0284251
1920	20.1	B6	cgre	18.4498
1921	20.7192	B6	cgre	18.4498
1922	21.3384	B6	cgre	6.27963
1923	21.9576	B6	cgre	1.04032
1924	22.5769	B6	cgre	-0.401404
1925	23.1961	B6	cgre	-2.82615
1926	23.8153	B6	cgre	-4.43863
1927	24.4345	B6	cgre	-4.56607
1928	25.0537	B6	cgre	-5.45891
1929	25.6729	B6	cgre	-7.07296
1930	26.2921	B6	cgre	-8.36898
1931	26.9113	B6	cgre	-8.90673
1932	27.5306	B6	cgre	-9.37269
1933	28.1498	B6	cgre	-10.7353
1934	28.769	B6	cgre	-12.4739
1935	29.3882	B6	cgre	-13.547
1936	30.0074	B6	cgre	-13.5945
1937	30.6266	B6	cgre	-13.6136
1938	31.2458	B6	cgre	-14.9507
1939	31.865	B6	cgre	-15.8834
1940	32.4843	B6	cgre	-15.6566
1941	33.1035	B6	cgre	-15.5961
1942	33.7227	B6	cgre	-15.8882
1943	34.3419	B6	cgre	-16.6366
1944	34.9611	B6	cgre	-17.1259
1945	35.5803	B6	cgre	-17.4832
1946	36.1995	B6	cgre	-18.1866
1947	36.8187	B6	cgre	-18.9929
1948	37.438	B6	cgre	-19.532
1949	38.0572	B6	cgre	-19.85
1950	38.6764	B6	cgre	-20.9906
1951	39.2956	B6	cgre	-21.5006
1952	39.9148	B6	cgre	-21.6806
1953	40.534	B6	cgre	-22.6233
1954	41.1532	B6	cgre	-23.604
1955	41.7724	B6	cgre	-25.156
1956	42.3917	B6	cgre	-26.0291
1957	43.0109	B6	cgre	-26.4287
1958	43.6301	B6	cgre	-27.1876
1959	44.2493	B6	cgre	-27.5336
1960	44.8685	B6	cgre	-24.4639
1961	45.4877	B6	cgre	-14.9266
1962	46.1069	B6	cgre	-4.49283
1963	46.7261	B6	cgre	0.0655607
1964	47.3454	B6	cgre	1.16084
1965	47.9646	B6	cgre	2.23391
1966	48.5838	B6	cgre	2.71086
1967	49.203	B6	cgre	2.87952
1968	49.8222	B6	cgre	3.24114
1969	50.4414	B6	cgre	3.47361
1970	51.0606	B6	cgre	3.82516
1971	51.6798	B6	cgre	4.84064
1972	52.2991	B6	cgre	5.98523
1973	52.9183	B6	cgre	6.57556
1974	53.5375	B6	cgre	7.47981
1975	54.1567	B6	cgre	8.71924
1976	54.7759	B6	cgre	9.33574
1977	55.3951	B6	cgre	10.3092
1978	56.0143	B6	cgre	12.1731
1979	56.6335	B6	cgre	13.4051
1980	57.2528	B6	cgre	14.4245
1981	57.872	B6	cgre	15.9905
1982	58.4912	B6	cgre	17.9213
1983	59.1104	B6	cgre	20.0938
1984	59.7296	B6	cgre	22.0654
1985	60.3488	B6	cgre	23.9725
1986	60.968	B6	cgre	25.6934
1987	61.5872	B6	cgre	28.0347
1988	62.2065	B6	cgre	30.9588
1989	62.8257	B6	cgre	33.3255
1990	63.4449	B6	cgre	36.1643
1991	64.0641	B6	cgre	40.5872
1992	64.6833	B6	cgre	46.8141
1993	65.3025	B6	cgre	56.0852
1994	65.9217	B6	cgre	67.4487
1995	66.5409	B6	cgre	79.1864
1996	67.1602	B6	cgre	90.9979
1997	67.7794	B6	cgre	103.972
1998	68.3986	B6	cgre	121.245
1999	69.0178	B6	cgre	143.747
2000	69.637	B6	cgre	172.626
2001	70.2562	B6	cgre	210.588
2002	70.8754	B6	cgre	259.194
2003	71.4946	B6	cgre	316.526
2004	72.1139	B6	cgre	375.343
2005	72.7331	B6	cgre	420.98
2006	73.3523	B6	cgre	425.421
2007	73.9715	B6	cgre	363.26
2008	74.5907	B6	cgre	244.102
2009	75.2099	B6	cgre	119.066
2010	75.8291	B6	cgre	38.5091
2011	76.4483	B6	cgre	7.23085
2012	77.0676	B6	cgre	0.636836
2013	77.6868	B6	cgre	0.183104
2014	78.306	B6	cgre	0.211712
2015	78.9252	B6	cgre	0.273988
2016	79.5444	B6	cgre	0.308002
2017	80.1636	B6	cgre	0.249293
2018	80.7828	B6	cgre	0.222331
2019	81.402	B6	cgre	0.225821
2020	82.0213	B6	cgre	0.199003
2021	82.6405	B6	cgre	0.21694
2022	83.2597	B6	cgre	0.189504
2023	83.8789	B6	cgre	0.112535
2024	84.4981	B6	cgre	0.059439
2025	85.1173	B6	cgre	0.0882266
2026	85.7365	B6	cgre	0.0958317
2027	86.3557	B6	cgre	0.0210159
2028	86.975	B6	cgre	0.0417286
2029	87.5942	B6	cgre	0.0446615
2030	88.2134	B6	cgre	0.00733492
2031	88.8326	B6	cgre	0.0388993
2032	89.4518	B6	cgre	0.03251
2033	90.071	B6	cgre	-0.000171163
2034	90.6902	B6	cgre	-0.000369796
2035	91.3094	B6	cgre	0.0268867
2036	91.9287	B6	cgre	0.0364394
2037	92.5479	B6	cgre	0.0145196
2038	93.1671	B6	cgre	0.0149175
2039	93.7863	B6	cgre	0.0354451
2040	94.4055	B6	cgre	0.0272234
2041	95.0247	B6	cgre	-0.00744161
2042	95.6439	B6	cgre	0.00619037
2043	96.2631	B6	cgre	0.0388115
2044	96.8824	B6	cgre	0.00521267
2045	97.5016	B6	cgre	-0.00917723
2046	98.1208	B6	cgre	0.0201047
2047	98.74	B6	cgre	0.0201047
2560	20.1	C1	blank	0.0281468
2561	20.7192	C1	blank	0.0281468
2562	21.3384	C1	blank	0.0117857
2563	21.9576	C1	blank	-0.0106876
2564	22.5769	C1	blank	-0.00987602
2565	23.1961	C1	blank	0.0292811
2566	23.8153	C1	blank	0.0370857
2567	24.4345	C1	blank	-0.00277358
2568	25.0537	C1	blank	-0.027259
2569	25.6729	C1	blank	-0.00632984
2570	26.2921	C1	blank	0.00419868
2571	26.9113	C1	blank	-0.00710033
2572	27.5306	C1	blank	0.0148061
2573	28.1498	C1	blank	-0.00490298
2574	28.769	C1	blank	-0.0163755
2575	29.3882	C1	blank	0.0421362
2576	30.0074	C1	blank	0.0542283
2577	30.6266	C1	blank	0.0138524
2578	31.2458	C1	blank	-0.0400686
2579	31.865	C1	blank	-0.0683959
2580	32.4843	C1	blank	-0.0168698
2581	33.1035	C1	blank	0.0372988
2582	33.7227	C1	blank	0.0312235
2583	34.3419	C1	blank	0.00886276
2584	34.9611	C1	blank	-0.0120756
2585	35.5803	C1	blank	-0.00875201
2586	36.1995	C1	blank	-0.0116518
2587	36.8187	C1	blank	-0.0214559
2588	37.438	C1	blank	-0.00369703
2589	38.0572	C1	blank	0.031325
2590	38.6764	C1	blank	0.0360905
2591	39.2956	C1	blank	0.00506535
2592	39.9148	C1	blank	-0.0220086
2593	40.534	C1	blank	-0.00837315
2594	41.1532	C1	blank	0.0476346
2595	41.7724	C1	blank	0.0321294
2596	42.3917	C1	blank	-0.0124215
2597	43.0109	C1	blank	-0.0293343
2598	43.6301	C1	blank	-0.0441878
2599	44.2493	C1	blank	0.0196488
2600	44.8685	C1	blank	0.00570243
2601	45.4877	C1	blank	-0.0388783
2602	46.1069	C1	blank	0.0188513
2603	46.7261	C1	blank	0.052989
2604	47.3454	C1	blank	0.0259775
2605	47.9646	C1	blank	0.00145703
2606	48.5838	C1	blank	0.0229626
2607	49.203	C1	blank	0.0174905
2608	49.8222	C1	blank	-0.000844536
2609	50.4414	C1	blank	0.0312341
2610	51.0606	C1	blank	0.039373
2611	51.6798	C1	blank	-0.0137564
2612	52.2991	C1	blank	-0.0383572
2613	52.9183	C1	blank	-0.0167142
2614	53.5375	C1	blank	0.0472792
2615	54.1567	C1	blank	0.104193
2616	54.7759	C1	blank	0.00198514
2617	55.3951	C1	blank	-0.0636678
2618	56.0143	C1	blank	0.0316758
2619	56.6335	C1	blank	0.0253215
2620	57.2528	C1	blank	-0.0347214
2621	57.872	C1	blank	-0.0126182
2622	58.4912	C1	blank	0.0352675
2623	59.1104	C1	blank	0.0465241
2624	59.7296	C1	blank	0.0186228
2625	60.3488	C1	blank	-0.0130264
2626	60.968	C1	blank	0.00666328
2627	61.5872	C1	blank	0.0607067
2628	62.2065	C1	blank	0.0527423
2629	62.8257	C1	blank	0.00325991
2630	63.4449	C1	blank	0.00686475
2631	64.0641	C1	blank	-0.0191512
2632	64.6833	C1	blank	-0.0256671
2633	65.3025	C1	blank	0.0339565
2634	65.9217	C1	blank	0.00956275
2635	66.5409	C1	blank	-0.0150627
2636	67.1602	C1	blank	0.00514274
2637	67.7794	C1	blank	0.0299711
2638	68.3986	C1	blank	0.0183708
2639	69.0178	C1	blank	-0.0202326
2640	69.637	C1	blank	-0.00147694
2641	70.2562	C1	blank	0.0128297
2642	70.8754	C1	blank	0.022046
2643	71.4946	C1	blank	0.0545081
2644	72.1139	C1	blank	0.0205349
2645	72.7331	C1	blank	-0.0322519
2646	73.3523	C1	blank	-0.0181432
2647	73.9715	C1	blank	0.00665888
2648	74.5907	C1	blank	0.00717514
2649	75.2099	C1	blank	-0.0195135
2650	75.8291	C1	blank	-0.0297413
2651	76.4483	C1	blank	0.0271295
2652	77.0676	C1	blank	0.0750698
2653	77.6868	C1	blank	0.0172359
2654	78.306	C1	blank	-0.0441237
2655	78.9252	C1	blank	-0.00204727
2656	79.5444	C1	blank	0.0487598
2657	80.1636	C1	blank	0.0496694
2658	80.7828	C1	blank	0.0329638
2659	81.402	C1	blank	0.020094
2660	82.0213	C1	blank	0.0128103
2661	82.6405	C1	blank	0.00898792
2662	83.2597	C1	blank	0.00990098
2663	83.8789	C1	blank	0.0212949
2664	84.4981	C1	blank	0.0363895
2665	85.1173	C1	blank	0.0372655
2666	85.7365	C1	blank	0.0123128
2667	86.3557	C1	blank	-0.00663028
2668	86.975	C1	blank	0.0127877
2669	87.5942	C1	blank	0.0228528
2670	88.2134	C1	blank	0.0156166
2671	88.8326	C1	blank	0.0329986
2672	89.4518	C1	blank	0.0398443
2673	90.071	C1	blank	0.0148942
2674	90.6902	C1	blank	-0.0124558
2675	91.3094	C1	blank	0.00484868
2676	91.9287	C1	blank	0.0287678
2677	92.5479	C1	blank	-0.0140153
2678	93.1671	C1	blank	-0.0263314
2679	93.7863	C1	blank	0.0141194
2680	94.4055	C1	blank	0.0550113
2681	95.0247	C1	blank	0.0463616
2682	95.6439	C1	blank	-0.0239765
2683	96.2631	C1	blank	-0.0218296
2684	96.8824	C1	blank	0.0217484
2685	97.5016	C1	blank	0.0505755
2686	98.1208	C1	blank	0.00217528
2687	98.74	C1	blank	0.00217528
2688	20.1	C2	amac	4.92867
2689	20.7192	C2	amac	4.92867
2690	21.3384	C2	amac	1.53429
2691	21.9576	C2	amac	0.212662
2692	22.5769	C2	amac	0.189066
2693	23.1961	C2	amac	0.115854
2694	23.8153	C2	amac	-0.48439
2695	24.4345	C2	amac	-1.13536
2696	25.0537	C2	amac	-1.10691
2697	25.6729	C2	amac	-0.920234
2698	26.2921	C2	amac	-1.26607
2699	26.9113	C2	amac	-1.49363
2700	27.5306	C2	amac	-1.57737
2701	28.1498	C2	amac	-1.77728
2702	28.769	C2	amac	-1.86523
2703	29.3882	C2	amac	-2.06038
2704	30.0074	C2	amac	-1.97967
2705	30.6266	C2	amac	-1.86524
2706	31.2458	C2	amac	-2.0926
2707	31.865	C2	amac	-2.10478
2708	32.4843	C2	amac	-1.72833
2709	33.1035	C2	amac	-1.11524
2710	33.7227	C2	amac	-0.917225
2711	34.3419	C2	amac	-0.944198
2712	34.9611	C2	amac	-0.740907
2713	35.5803	C2	amac	-0.354173
2714	36.1995	C2	amac	-0.166394
2715	36.8187	C2	amac	-0.285774
2716	37.438	C2	amac	-0.42828
2717	38.0572	C2	amac	-0.231342
2718	38.6764	C2	amac	0.172669
2719	39.2956	C2	amac	0.450464
2720	39.9148	C2	amac	0.504414
2721	40.534	C2	amac	0.315458
2722	41.1532	C2	amac	0.55887
2723	41.7724	C2	amac	0.799358
2724	42.3917	C2	amac	0.574451
2725	43.0109	C2	amac	0.0797675
2726	43.6301	C2	amac	-0.227921
2727	44.2493	C2	amac	0.920515
2728	44.8685	C2	amac	3.98352
2729	45.4877	C2	amac	7.36975
2730	46.1069	C2	amac	9.09781
2731	46.7261	C2	amac	9.42796
2732	47.3454	C2	amac	9.43126
2733	47.9646	C2	amac	9.66814
2734	48.5838	C2	amac	10.112
2735	49.203	C2	amac	10.1576
2736	49.8222	C2	amac	10.1617
2737	50.4414	C2	amac	10.5891
2738	51.0606	C2	amac	10.5313
2739	51.6798	C2	amac	10.4328
2740	52.2991	C2	amac	10.8524
2741	52.9183	C2	amac	10.9755
2742	53.5375	C2	amac	10.9451
2743	54.1567	C2	amac	10.8626
2744	54.7759	C2	amac	11.051
2745	55.3951	C2	amac	11.1728
2746	56.0143	C2	amac	11.1609
2747	56.6335	C2	amac	11.4022
2748	57.2528	C2	amac	11.3611
2749	57.872	C2	amac	11.3866
2750	58.4912	C2	amac	11.7943
2751	59.1104	C2	amac	11.8962
2752	59.7296	C2	amac	11.7537
2753	60.3488	C2	amac	11.9087
2754	60.968	C2	amac	12.3857
2755	61.5872	C2	amac	12.6724
2756	62.2065	C2	amac	12.578
2757	62.8257	C2	amac	12.7584
2758	63.4449	C2	amac	13.2729
2759	64.0641	C2	amac	13.738
2760	64.6833	C2	amac	14.1385
2761	65.3025	C2	amac	14.5922
2762	65.9217	C2	amac	14.9322
2763	66.5409	C2	amac	15.2454
2764	67.1602	C2	amac	15.8216
2765	67.7794	C2	amac	16.2196
2766	68.3986	C2	amac	16.3028
2767	69.0178	C2	amac	16.6482
2768	69.637	C2	amac	17.0556
2769	70.2562	C2	amac	17.3944
2770	70.8754	C2	amac	17.6523
2771	71.4946	C2	amac	17.9255
2772	72.1139	C2	amac	18.3603
2773	72.7331	C2	amac	18.5536
2774	73.3523	C2	amac	18.6155
2775	73.9715	C2	amac	18.9375
2776	74.5907	C2	amac	19.4464
2777	75.2099	C2	amac	19.9694
2778	75.8291	C2	amac	20.6784
2779	76.4483	C2	amac	21.5347
2780	77.0676	C2	amac	22.3179
2781	77.6868	C2	amac	23.497
2782	78.306	C2	amac	25.2642
2783	78.9252	C2	amac	27.2901
2784	79.5444	C2	amac	29.53
2785	80.1636	C2	amac	31.9343
2786	80.7828	C2	amac	34.3733
2787	81.402	C2	amac	36.6499
2788	82.0213	C2	amac	38.8176
2789	82.6405	C2	amac	40.3688
2790	83.2597	C2	amac	40.9027
2791	83.8789	C2	amac	39.9051
2792	84.4981	C2	amac	36.7851
2793	85.1173	C2	amac	31.3063
2794	85.7365	C2	amac	23.5581
2795	86.3557	C2	amac	15.1157
2796	86.975	C2	amac	8.13847
2797	87.5942	C2	amac	3.72346
2798	88.2134	C2	amac	1.49265
2799	88.8326	C2	amac	0.601972
2800	89.4518	C2	amac	0.292859
2801	90.071	C2	amac	0.120998
2802	90.6902	C2	amac	0.0272759
2803	91.3094	C2	amac	0.0382102
2804	91.9287	C2	amac	0.0626681
2805	92.5479	C2	amac	0.0548382
2806	93.1671	C2	amac	0.0189395
2807	93.7863	C2	amac	-0.00256632
2808	94.4055	C2	amac	0.0174309
2809	95.0247	C2	amac	0.0498697
2810	95.6439	C2	amac	0.0126831
2811	96.2631	C2	amac	-0.0559902
2812	96.8824	C2	amac	-0.0166765
2813	97.5016	C2	amac	0.060348
2814	98.1208	C2	amac	0.0395461
2815	98.74	C2	amac	0.0395461
2816	20.1	C3	amacV14L	8.76705
2817	20.7192	C3	amacV14L	8.76705
2818	21.3384	C3	amacV14L	2.96491
2819	21.9576	C3	amacV14L	4.25864
2820	22.5769	C3	amacV14L	8.24864
2821	23.1961	C3	amacV14L	4.90896
2822	23.8153	C3	amacV14L	-0.919901
2823	24.4345	C3	amacV14L	-1.9277
2824	25.0537	C3	amacV14L	-1.56689
2825	25.6729	C3	amacV14L	-2.62646
2826	26.2921	C3	amacV14L	-3.43022
2827	26.9113	C3	amacV14L	-3.24157
2828	27.5306	C3	amacV14L	-3.02638
2829	28.1498	C3	amacV14L	-3.1446
2830	28.769	C3	amacV14L	-3.92816
2831	29.3882	C3	amacV14L	-4.4573
2832	30.0074	C3	amacV14L	-4.07274
2833	30.6266	C3	amacV14L	-3.95226
2834	31.2458	C3	amacV14L	-4.30622
2835	31.865	C3	amacV14L	-4.19771
2836	32.4843	C3	amacV14L	-3.76187
2837	33.1035	C3	amacV14L	-3.65692
2838	33.7227	C3	amacV14L	-3.59803
2839	34.3419	C3	amacV14L	-3.45738
2840	34.9611	C3	amacV14L	-3.00957
2841	35.5803	C3	amacV14L	-2.55884
2842	36.1995	C3	amacV14L	-2.80637
2843	36.8187	C3	amacV14L	-3.08054
2844	37.438	C3	amacV14L	-2.99415
2845	38.0572	C3	amacV14L	-2.60142
2846	38.6764	C3	amacV14L	-2.3583
2847	39.2956	C3	amacV14L	-2.50104
2848	39.9148	C3	amacV14L	-2.60448
2849	40.534	C3	amacV14L	-2.56469
2850	41.1532	C3	amacV14L	-2.55418
2851	41.7724	C3	amacV14L	-2.91931
2852	42.3917	C3	amacV14L	-3.39093
2853	43.0109	C3	amacV14L	-3.4384
2854	43.6301	C3	amacV14L	-2.92328
2855	44.2493	C3	amacV14L	-1.19283
2856	44.8685	C3	amacV14L	2.54472
2857	45.4877	C3	amacV14L	6.51549
2858	46.1069	C3	amacV14L	8.52434
2859	46.7261	C3	amacV14L	9.16419
2860	47.3454	C3	amacV14L	9.47704
2861	47.9646	C3	amacV14L	9.62218
2862	48.5838	C3	amacV14L	9.92957
2863	49.203	C3	amacV14L	10.2457
2864	49.8222	C3	amacV14L	10.384
2865	50.4414	C3	amacV14L	10.8015
2866	51.0606	C3	amacV14L	11.0552
2867	51.6798	C3	amacV14L	10.8197
2868	52.2991	C3	amacV14L	10.9758
2869	52.9183	C3	amacV14L	11.3714
2870	53.5375	C3	amacV14L	11.4244
2871	54.1567	C3	amacV14L	11.3265
2872	54.7759	C3	amacV14L	11.3507
2873	55.3951	C3	amacV14L	11.7553
2874	56.0143	C3	amacV14L	12.1208
2875	56.6335	C3	amacV14L	12.2399
2876	57.2528	C3	amacV14L	12.2455
2877	57.872	C3	amacV14L	12.5835
2878	58.4912	C3	amacV14L	13.0202
2879	59.1104	C3	amacV14L	13.1003
2880	59.7296	C3	amacV14L	13.3846
2881	60.3488	C3	amacV14L	13.9232
2882	60.968	C3	amacV14L	14.6038
2883	61.5872	C3	amacV14L	15.0797
2884	62.2065	C3	amacV14L	15.1998
2885	62.8257	C3	amacV14L	15.621
2886	63.4449	C3	amacV14L	16.1969
2887	64.0641	C3	amacV14L	16.8184
2888	64.6833	C3	amacV14L	17.3322
2889	65.3025	C3	amacV14L	17.8224
2890	65.9217	C3	amacV14L	18.2317
2891	66.5409	C3	amacV14L	18.5263
2892	67.1602	C3	amacV14L	18.9962
2893	67.7794	C3	amacV14L	19.5063
2894	68.3986	C3	amacV14L	19.8227
2895	69.0178	C3	amacV14L	19.8508
2896	69.637	C3	amacV14L	20.2095
2897	70.2562	C3	amacV14L	20.8273
2898	70.8754	C3	amacV14L	21.3198
2899	71.4946	C3	amacV14L	21.6577
2900	72.1139	C3	amacV14L	21.9684
2901	72.7331	C3	amacV14L	22.5579
2902	73.3523	C3	amacV14L	23.4177
2903	73.9715	C3	amacV14L	24.4771
2904	74.5907	C3	amacV14L	25.6633
2905	75.2099	C3	amacV14L	27.247
2906	75.8291	C3	amacV14L	29.386
2907	76.4483	C3	amacV14L	31.8285
2908	77.0676	C3	amacV14L	34.5952
2909	77.6868	C3	amacV14L	37.8302
2910	78.306	C3	amacV14L	41.8829
2911	78.9252	C3	amacV14L	46.4409
2912	79.5444	C3	amacV14L	50.7831
2913	80.1636	C3	amacV14L	54.9138
2914	80.7828	C3	amacV14L	58.2085
2915	81.402	C3	amacV14L	59.6101
2916	82.0213	C3	amacV14L	58.5707
2917	82.6405	C3	amacV14L	53.9608
2918	83.2597	C3	amacV14L	45.0431
2919	83.8789	C3	amacV14L	32.792
2920	84.4981	C3	amacV14L	20.0731
2921	85.1173	C3	amacV14L	10.0761
2922	85.7365	C3	amacV14L	4.08615
2923	86.3557	C3	amacV14L	1.36756
2924	86.975	C3	amacV14L	0.479593
2925	87.5942	C3	amacV14L	0.29236
2926	88.2134	C3	amacV14L	0.161316
2927	88.8326	C3	amacV14L	0.104175
2928	89.4518	C3	amacV14L	0.130876
2929	90.071	C3	amacV14L	0.0633137
2930	90.6902	C3	amacV14L	0.0101343
2931	91.3094	C3	amacV14L	0.0229149
2932	91.9287	C3	amacV14L	0.0385854
2933	92.5479	C3	amacV14L	0.0151091
2934	93.1671	C3	amacV14L	-0.00143474
2935	93.7863	C3	amacV14L	0.0158939
2936	94.4055	C3	amacV14L	0.0551105
2937	95.0247	C3	amacV14L	0.0617577
2938	95.6439	C3	amacV14L	0.0123956
2939	96.2631	C3	amacV14L	-0.014785
2940	96.8824	C3	amacV14L	-0.0316033
2941	97.5016	C3	amacV14L	-0.00110899
2942	98.1208	C3	amacV14L	0.0736728
2943	98.74	C3	amacV14L	0.0736728
2944	20.1	C4	av	4.7888
2945	20.7192	C4	av	4.7888
2946	21.3384	C4	av	0.100524
2947	21.9576	C4	av	-2.38606
2948	22.5769	C4	av	-3.01029
2949	23.1961	C4	av	-3.20149
2950	23.8153	C4	av	-3.85238
2951	24.4345	C4	av	-4.41085
2952	25.0537	C4	av	-4.42221
2953	25.6729	C4	av	-4.58135
2954	26.2921	C4	av	-4.87758
2955	26.9113	C4	av	-5.0684
2956	27.5306	C4	av	-5.31671
2957	28.1498	C4	av	-5.4539
2958	28.769	C4	av	-5.69355
2959	29.3882	C4	av	-5.99784
2960	30.0074	C4	av	-6.19604
2961	30.6266	C4	av	-6.37694
2962	31.2458	C4	av	-6.55947
2963	31.865	C4	av	-6.70449
2964	32.4843	C4	av	-6.81993
2965	33.1035	C4	av	-7.01997
2966	33.7227	C4	av	-7.18833
2967	34.3419	C4	av	-7.09427
2968	34.9611	C4	av	-7.05514
2969	35.5803	C4	av	-7.26279
2970	36.1995	C4	av	-7.2765
2971	36.8187	C4	av	-7.11813
2972	37.438	C4	av	-7.31726
2973	38.0572	C4	av	-7.64381
2974	38.6764	C4	av	-7.69838
2975	39.2956	C4	av	-7.81924
2976	39.9148	C4	av	-8.08337
2977	40.534	C4	av	-8.27281
2978	41.1532	C4	av	-8.40252
2979	41.7724	C4	av	-8.71792
2980	42.3917	C4	av	-9.17574
2981	43.0109	C4	av	-9.72675
2982	43.6301	C4	av	-9.74817
2983	44.2493	C4	av	-7.41684
2984	44.8685	C4	av	-4.08602
2985	45.4877	C4	av	-2.38891
2986	46.1069	C4	av	-1.91511
2987	46.7261	C4	av	-1.6875
2988	47.3454	C4	av	-1.38934
2989	47.9646	C4	av	-1.26894
2990	48.5838	C4	av	-1.27614
2991	49.203	C4	av	-1.06304
2992	49.8222	C4	av	-0.850048
2993	50.4414	C4	av	-0.744809
2994	51.0606	C4	av	-0.706002
2995	51.6798	C4	av	-0.794636
2996	52.2991	C4	av	-0.616255
2997	52.9183	C4	av	-0.219841
2998	53.5375	C4	av	0.161909
2999	54.1567	C4	av	0.340839
3000	54.7759	C4	av	-0.0215525
3001	55.3951	C4	av	0.0371318
3002	56.0143	C4	av	0.448736
3003	56.6335	C4	av	0.669328
3004	57.2528	C4	av	1.00312
3005	57.872	C4	av	1.17356
3006	58.4912	C4	av	1.38882
3007	59.1104	C4	av	1.49859
3008	59.7296	C4	av	1.37113
3009	60.3488	C4	av	1.76174
3010	60.968	C4	av	2.33199
3011	61.5872	C4	av	2.49062
3012	62.2065	C4	av	2.41941
3013	62.8257	C4	av	2.48137
3014	63.4449	C4	av	2.90657
3015	64.0641	C4	av	3.28701
3016	64.6833	C4	av	3.37423
3017	65.3025	C4	av	3.53811
3018	65.9217	C4	av	3.81139
3019	66.5409	C4	av	4.17358
3020	67.1602	C4	av	4.68977
3021	67.7794	C4	av	4.98452
3022	68.3986	C4	av	5.21942
[truncated: 4,145 more rows]
