# Supplementary material for: Heterogeneity of the GFP fitness landscape and data-driven protein design
Source: eLife. 2022 May 5;11:e75842. doi: 10.7554/eLife.75842 (PMC9119679; doi:10.7554/eLife.75842)
Supplement: Source data 8. [file elife-75842-data8.csv]

full_seq	aa_genotype_native	aa_genotype_pseudo	gene	distance	non_extant_muts	katya_fitness	aubin_fitness	mutated_nt_coding	plate	sq_name	well	fiji_value
MSKGDELFTGIVPVLIELDGDVHGHKFSVRGEGEGDADYGKLEIKFICTTGKLPVPWPTLVTTLSYGILCFARYPEHMKMNDFFKSAMPQGYIQERTIFFQDDGKYKTRGEVKFEGDTLVNRIELKGMAFKEDGNILGHKLEYNFNSHNVYIMPDKANNGLKVNFKIRHNIEGGGVQLAGHYQTNVPLGNGPVLIPINHYLSCQTAISKDRNETRDHMVFLEFFSACGHTHGTDELYK*	E4D:E89Q:D128A:D179G:D189N:M232T	E7D:E93Q:D132A:D183G:D193N:M240T	amac	6	6	4.0479817	4.07126	ATGAGCAAGGGCGATGAGCTGTTCACCGGGATCGTGCCCGTCCTGATTGAGCTGGACGGCGACGTACACGGCCACAAGTTCAGCGTGCGCGGCGAGGGCGAGGGCGATGCCGACTACGGCAAGCTGGAGATCAAGTTCATCTGCACCACCGGCAAGCTGCCCGTGCCCTGGCCCACCCTCGTGACCACCCTGTCGTACGGCATTTTGTGCTTCGCGCGCTACCCCGAACACATGAAGATGAACGACTTCTTCAAGTCCGCCATGCCCCAGGGCTACATCCAGGAGCGCACCATCTTCTTCCAGGACGACGGCAAGTACAAGACCCGTGGGGAGGTGAAGTTCGAGGGCGACACACTGGTGAACCGCATCGAGCTGAAGGGCATGGCATTCAAGGAGGAC…	1	amac6_3512	A1	48
MSKGEELFTGIVPVLIELDGDVQGHKFSVRGEGEGDADYGKLEIKFICTTGKLPVPWPTLVTTLSYGILCFARYPEHMKMNDFFKSAMPEGYIQERTIFFQDDGKYKTRGEVKFEGDTLVNRIELKGMDFKEDGNILGHKLEYNFNSHYVYIMPDKANNALKVNFKIRHNIEGGGVQFADHCQTNVPLGDGPVLIPINHYLSCQTAISKDRNETRDHMVFLEFFSAGGHTHGMDELYK*	H22Q:N148Y:G159A:L177F:Y181C:C226G	H25Q:N152Y:G163A:L181F:Y185C:C234G	amac	6	6	3.9804282	4.1536574	ATGAGCAAGGGCGAGGAGCTGTTCACCGGGATCGTGCCCGTCCTGATTGAGCTGGACGGCGACGTACAAGGCCACAAGTTCAGCGTGCGCGGCGAGGGCGAGGGCGATGCCGACTACGGCAAGCTGGAGATCAAGTTCATCTGCACCACCGGCAAGCTGCCCGTGCCCTGGCCCACCCTCGTGACCACCCTGTCGTACGGCATTTTGTGCTTCGCGCGCTACCCCGAACACATGAAGATGAACGACTTCTTCAAGTCCGCCATGCCCGAAGGCTACATCCAGGAGCGCACCATCTTCTTCCAGGACGACGGCAAGTACAAGACCCGTGGGGAGGTGAAGTTCGAGGGCGACACACTGGTGAACCGCATCGAGCTGAAGGGCATGGACTTCAAGGAGGAC…	1	amac6_2908	B1	75
MSKGEELFTGIVPVLIELDGDVHGHKFSVRGEGEGDADYGKLEIKFICTTGKLPVPWPTLVTTLSYGILCFARYPEHMKMNDFFKSAMPEGYIQERTIFFQDDGKYKTRGEVKFEGDTLVNRIELKGMDFKEDGNILGHKMEYNFNSHYVYIMPDKANNGLKVNFQIRHNIEGGGVQLADHYQTNFPLGDGPVLIPINHYLRCQTAISKDRNETRDHMVFLEFFSACGHTHGMDEPYK*	L140M:N148Y:K165Q:V185F:S201R:L235P	L144M:N152Y:K169Q:V189F:S208R:L243P	amac	6	6	4.0915537	4.1893606	ATGAGCAAGGGCGAGGAGCTGTTCACCGGGATCGTGCCCGTCCTGATTGAGCTGGACGGCGACGTACACGGCCACAAGTTCAGCGTGCGCGGCGAGGGCGAGGGCGATGCCGACTACGGCAAGCTGGAGATCAAGTTCATCTGCACCACCGGCAAGCTGCCCGTGCCCTGGCCCACCCTCGTGACCACCCTGTCGTACGGCATTTTGTGCTTCGCGCGCTACCCCGAACACATGAAGATGAACGACTTCTTCAAGTCCGCCATGCCCGAAGGCTACATCCAGGAGCGCACCATCTTCTTCCAGGACGACGGCAAGTACAAGACCCGTGGGGAGGTGAAGTTCGAGGGCGACACACTGGTGAACCGCATCGAGCTGAAGGGCATGGACTTCAAGGAGGAC…	1	amac6_3306	C1	75
MSKGEELFTGIVPVLIELNGDVHGHKFSVRGEGEGDADYGKLEIKFICTTGKLPVPWPTLVTTLSYGILCFARYPEHMKMNDFFKSAMPEGYIQERTIFFQADGKYKTRGEVKFEGATLVNRIELKGMDFKEDGNILGHKLEYNFNSHNVYIMPDKPNNGLKVNFKIRHNIEGGGVQLADHSQTNVPLGDGPVLIPINHYLSCQTAISKDRNETRDHMVFLEFFSACGHTDGMDELYK*	D18N:D101A:D116A:A156P:Y181S:H230D	D21N:D105A:D120A:A160P:Y185S:H238D	amac	6	6	4.0777574	4.1234274	ATGAGCAAGGGCGAGGAGCTGTTCACCGGGATCGTGCCCGTCCTGATTGAGCTGAATGGCGACGTACACGGCCACAAGTTCAGCGTGCGCGGCGAGGGCGAGGGCGATGCCGACTACGGCAAGCTGGAGATCAAGTTCATCTGCACCACCGGCAAGCTGCCCGTGCCCTGGCCCACCCTCGTGACCACCCTGTCGTACGGCATTTTGTGCTTCGCGCGCTACCCCGAACACATGAAGATGAACGACTTCTTCAAGTCCGCCATGCCCGAAGGCTACATCCAGGAGCGCACCATCTTCTTCCAGGCGGACGGCAAGTACAAGACCCGTGGGGAGGTGAAGTTCGAGGGCGCCACACTGGTGAACCGCATCGAGCTGAAGGGCATGGACTTCAAGGAGGAC…	1	amac6_3873	D1	47
MSKGEELFTGIVPVLIELNGNVHGHKFSVRGEGEGDADYGKLEIKCICTTGRLPVPWPTLVTTLSYGILCFARYPEHMKMNDFFKSAMPEGYIQERTIFFQDDGKYKTRGEVKFEGDTLVNRIELKGMDFKEDGKILGHKLEYNFNSHNVYIMPDKANNGLKVNFKVRHNIEGGGVQLADHYQTNVPLGDGPVLIPINHYLSCQTAISKDRNETRDHMVFLEFFSACGHTHGMDELYK*	D18N:D20N:F45C:K51R:N134K:I166V	D21N:D23N:F48C:K54R:N138K:I170V	amac	6	5	4.3059773	4.2666845	ATGAGCAAGGGCGAGGAGCTGTTCACCGGGATCGTGCCCGTCCTGATTGAGCTGAATGGCAATGTACACGGCCACAAGTTCAGCGTGCGCGGCGAGGGCGAGGGCGATGCCGACTACGGCAAGCTGGAGATCAAGTGCATCTGCACCACCGGCCGTCTGCCCGTGCCCTGGCCCACCCTCGTGACCACCCTGTCGTACGGCATTTTGTGCTTCGCGCGCTACCCCGAACACATGAAGATGAACGACTTCTTCAAGTCCGCCATGCCCGAAGGCTACATCCAGGAGCGCACCATCTTCTTCCAGGACGACGGCAAGTACAAGACCCGTGGGGAGGTGAAGTTCGAGGGCGACACACTGGTGAACCGCATCGAGCTGAAGGGCATGGACTTCAAGGAGGAC…	1	amac6_930	E1	71
MSKGEELFTGIVPVLIELDGDVHGHKFSVRGEGEGDANYGKLEIKFICTTGKLPVPWPTLVTTLSYGILCFARYPEHMKMNDFFKSAMPEGYIQERTIFFQDDGKYKTRGEVKFEGDTLVNRIELKGMDFKEDGKILGHKLEYNFNSHNVYIKPDKANNGLKVNFKIRHNIEGGRVQLADHYQTNVPLGDGPVLIPINHYLSCQTAISKDRNETRDHMVFLECFNACGHTHGMDELYK*	D37N:N134K:M152K:G174R:F222C:S224N	D40N:N138K:M156K:G178R:F230C:S232N	amac	6	4	3.98768	4.030179	ATGAGCAAGGGCGAGGAGCTGTTCACCGGGATCGTGCCCGTCCTGATTGAGCTGGACGGCGACGTACACGGCCACAAGTTCAGCGTGCGCGGCGAGGGCGAGGGCGATGCCAACTACGGCAAGCTGGAGATCAAGTTCATCTGCACCACCGGCAAGCTGCCCGTGCCCTGGCCCACCCTCGTGACCACCCTGTCGTACGGCATTTTGTGCTTCGCGCGCTACCCCGAACACATGAAGATGAACGACTTCTTCAAGTCCGCCATGCCCGAAGGCTACATCCAGGAGCGCACCATCTTCTTCCAGGACGACGGCAAGTACAAGACCCGTGGGGAGGTGAAGTTCGAGGGCGACACACTGGTGAACCGCATCGAGCTGAAGGGCATGGACTTCAAGGAGGAC…	1	amac6_1802	F1	47
MSKGEELFTGIVPVLIELAGDVHGHKFSVRGEGEGDADYGKLVIKVICTTGKLPVPWPTLVTTLSYGILCFARYPEHMKMNDFFKSAMPEGYIQERTIFFQDDGKYKTRGEVKFEGVTLVNRIELKGMDFKEDGNILGHKLEYNFNSHNVYIMPDKANNGLKVNFKIRHNIEGGGVQLADHYQTNVPLGDGPVLIPINHYLSCQTAISKDRNETRDHMVFLEFFSACGHTHGRNELYK*	D18A:E42V:F45V:D116V:M232R:D233N	D21A:E45V:F48V:D120V:M240R:D241N	amac	6	3	3.9955373	4.167077	ATGAGCAAGGGCGAGGAGCTGTTCACCGGGATCGTGCCCGTCCTGATTGAGCTGGCTGGCGACGTACACGGCCACAAGTTCAGCGTGCGCGGCGAGGGCGAGGGCGATGCCGACTACGGCAAGCTGGTGATCAAGGTGATCTGCACCACCGGCAAGCTGCCCGTGCCCTGGCCCACCCTCGTGACCACCCTGTCGTACGGCATTTTGTGCTTCGCGCGCTACCCCGAACACATGAAGATGAACGACTTCTTCAAGTCCGCCATGCCCGAAGGCTACATCCAGGAGCGCACCATCTTCTTCCAGGACGACGGCAAGTACAAGACCCGTGGGGAGGTGAAGTTCGAGGGCGTAACACTGGTGAACCGCATCGAGCTGAAGGGCATGGACTTCAAGGAGGAC…	1	amac6_2000	G1	15
MSKGEELFTGIVPVLIELDGDVHGHKFSVRGEGEGDADYGKLEIKFICTTGKLPVPWPTLVTTLSYGILCFARYPEHMKMNDFFKSAMPEGYIQERTIFFQDDGKYKTRGEVKFEGNTLVNRIELKGMDFKEDGNILGHKLEYNFNSHNVYIMPDQANNGLKVNFKIRHNIEGGGVQFADHYQTNVPLGDGPVLIPINHYLSCQTALSKDRNETRDHMVFLEFFSACEHTSGMDELYK*	D116N:K155Q:L177F:I206L:G227E:H230S	D120N:K159Q:L181F:I213L:G235E:H238S	amac	6	3	4.269565	4.264216	ATGAGCAAGGGCGAGGAGCTGTTCACCGGGATCGTGCCCGTCCTGATTGAGCTGGACGGCGACGTACACGGCCACAAGTTCAGCGTGCGCGGCGAGGGCGAGGGCGATGCCGACTACGGCAAGCTGGAGATCAAGTTCATCTGCACCACCGGCAAGCTGCCCGTGCCCTGGCCCACCCTCGTGACCACCCTGTCGTACGGCATTTTGTGCTTCGCGCGCTACCCCGAACACATGAAGATGAACGACTTCTTCAAGTCCGCCATGCCCGAAGGCTACATCCAGGAGCGCACCATCTTCTTCCAGGACGACGGCAAGTACAAGACCCGTGGGGAGGTGAAGTTCGAGGGCAATACACTGGTGAACCGCATCGAGCTGAAGGGCATGGACTTCAAGGAGGAC…	1	amac6_1780	H1	79
MSKGEDLFTGIVPVLIELDGDVHGNKFSVRGEGEGDADYGKLEIKFICTTGQLPVPWPTLVTTLSYGILCFARYPEHMKMNDFFKSAMPEGYIQERTIFFQDDGKYKTRGEVKFEGDTLVNRIELKGMDFKEDGNILGHKMEYNFNSHNVYIMPDKANNGLKVNFKIRHNIEGGGVQLADHYQTNVPLGDGPVLIPINHYLSCQTAISKDRNETRDHMVFLEFFNACGHTSGMDELYK*	E5D:H24N:K51Q:L140M:S224N:H230S	E8D:H27N:K54Q:L144M:S232N:H238S	amac	6	3	4.102767	4.1010246	ATGAGCAAGGGCGAGGACCTGTTCACCGGGATCGTGCCCGTCCTGATTGAGCTGGACGGCGACGTACACGGCAACAAGTTCAGCGTGCGCGGCGAGGGCGAGGGCGATGCCGACTACGGCAAGCTGGAGATCAAGTTCATCTGCACCACCGGCCAGCTGCCCGTGCCCTGGCCCACCCTCGTGACCACCCTGTCGTACGGCATTTTGTGCTTCGCGCGCTACCCCGAACACATGAAGATGAACGACTTCTTCAAGTCCGCCATGCCCGAAGGCTACATCCAGGAGCGCACCATCTTCTTCCAGGACGACGGCAAGTACAAGACCCGTGGGGAGGTGAAGTTCGAGGGCGACACACTGGTGAACCGCATCGAGCTGAAGGGCATGGACTTCAAGGAGGAC…	1	amac6_809	A2	26
MSKGEELFTGIVPVLIELDGDVHGHKFSVRGEGKGDANYGKLEIKFICTTGKLPVPWPTLVTTLSYGILCFARYPEHMKMNDFFKSAMPEGYIQERTIFFQDDGKYKTRGAVKFEGDTLVNRVELKGMDFKEDGNILGHKLEYNFNSHNVYIMPDKANNGLKVNFKIRHNIEGGGVQLADHYQTNVPLGDGPVLIPINHYLSSQTAISKDRNEARDHMVFLEFFSACGHTHGMDELYK*	E33K:D37N:E110A:I122V:C202S:T213A	E36K:D40N:E114A:I126V:C209S:T221A	amac	6	2	4.080326	4.154895	ATGAGCAAGGGCGAGGAGCTGTTCACCGGGATCGTGCCCGTCCTGATTGAGCTGGACGGCGACGTACACGGCCACAAGTTCAGCGTGCGCGGCGAGGGCAAGGGCGATGCCAACTACGGCAAGCTGGAGATCAAGTTCATCTGCACCACCGGCAAGCTGCCCGTGCCCTGGCCCACCCTCGTGACCACCCTGTCGTACGGCATTTTGTGCTTCGCGCGCTACCCCGAACACATGAAGATGAACGACTTCTTCAAGTCCGCCATGCCCGAAGGCTACATCCAGGAGCGCACCATCTTCTTCCAGGACGACGGCAAGTACAAGACCCGTGGGGCTGTGAAGTTCGAGGGCGACACACTGGTGAACCGCGTAGAGCTGAAGGGCATGGACTTCAAGGAGGAC…	1	amac6_1428	B2	106
MSKGEELFTGIVPVLIELDGDVHGHKFSVRGEGEGDADYGKLEVKFICTTGQLPVPWPTLVTTLSYGILCFARYPEHMKMNDFFKSAMPEGYIQERTIFFQDDGKYKTRGEVKFEGDTLVNRIELKGMDFKEDGNILGHKLEYNFNSHNVYIMPDKANNGLKVNFKIRLNIEGGVVQLADHFQTNVPLGDGPVLIPINHYLSCQSAISKDRNETRDHMVFLEFFSACGHTHGMDELYK*	I43V:K51Q:H168L:G174V:Y181F:T204S	I46V:K54Q:H172L:G178V:Y185F:T211S	amac	6	2	4.184508	4.1791143	ATGAGCAAGGGCGAGGAGCTGTTCACCGGGATCGTGCCCGTCCTGATTGAGCTGGACGGCGACGTACACGGCCACAAGTTCAGCGTGCGCGGCGAGGGCGAGGGCGATGCCGACTACGGCAAGCTGGAGGTCAAGTTCATCTGCACCACCGGCCAACTGCCCGTGCCCTGGCCCACCCTCGTGACCACCCTGTCGTACGGCATTTTGTGCTTCGCGCGCTACCCCGAACACATGAAGATGAACGACTTCTTCAAGTCCGCCATGCCCGAAGGCTACATCCAGGAGCGCACCATCTTCTTCCAGGACGACGGCAAGTACAAGACCCGTGGGGAGGTGAAGTTCGAGGGCGACACACTGGTGAACCGCATCGAGCTGAAGGGCATGGACTTCAAGGAGGAC…	1	amac6_775	C2	5
MSKGEELFTGIVPVLIELDGDVHGHKFSVRGEGEGDADYGKLEIKFICTTGKLPVPWPTLVTTLSYGILCFARYPEHMKMNDFFKSAMPEGYIQERTILFQDDGKYKTRGEVKFEGDTLVNRIELKGMDFKEDGNILGHKLEYNFNSHNVYIMPDKANNGLKVNFKIRHNIEGGGVQLAYHYQTNVPLGDGPVLIPSNHYLRCQTALSKDRNETRDHMVFLEFFSACGLTHGMDELYK*	F98L:D179Y:I196S:S201R:I206L:H228L	F102L:D183Y:I203S:S208R:I213L:H236L	amac	6	2	4.1917567	4.1279316	ATGAGCAAGGGCGAGGAGCTGTTCACCGGGATCGTGCCCGTCCTGATTGAGCTGGACGGCGACGTACACGGCCACAAGTTCAGCGTGCGCGGCGAGGGCGAGGGCGATGCCGACTACGGCAAGCTGGAGATCAAGTTCATCTGCACCACCGGCAAGCTGCCCGTGCCCTGGCCCACCCTCGTGACCACCCTGTCGTACGGCATTTTGTGCTTCGCGCGCTACCCCGAACACATGAAGATGAACGACTTCTTCAAGTCCGCCATGCCCGAAGGCTACATCCAGGAGCGCACCATCTTGTTCCAGGACGACGGCAAGTACAAGACCCGTGGGGAGGTGAAGTTCGAGGGCGACACACTGGTGAACCGCATCGAGCTGAAGGGCATGGACTTCAAGGAGGAC…	1	amac6_1118	D2	84
MSKGEELFTGIVPVLIELDGDVHGHKFSVRGEGEGDAAYGKLEIKFICTTGTLPVPWPTLVTTLSYGILCFARYPEHMKMNDFFKSAMPEGYIQERTIFFQDDGKYKTRGEVKFEGDTLVNRIELKGMAFTEDGNILGHKMEYTFNSHKVYIMPDKANNGLKVNFKIRHNIEGGGVQHADHDQTNVPLGNGPVLIPINHYLRCQTAISKDRNETRDHMVFLEFFSACGHTDGMDELYK*	D37A:K51T:D128A:K130T:L140M:N143T:N148K:L177H:Y181D:D189N:S201R:H230D	D40A:K54T:D132A:K134T:L144M:N147T:N152K:L181H:Y185D:D193N:S208R:H238D	amac	12	12	4.227651	4.365663	ATGAGCAAGGGCGAGGAGCTGTTCACCGGGATCGTGCCCGTCCTGATTGAGCTGGACGGCGACGTACACGGCCACAAGTTCAGCGTGCGCGGCGAGGGCGAGGGCGATGCCGCCTACGGCAAGCTGGAGATCAAGTTCATCTGCACCACCGGCACACTGCCCGTGCCCTGGCCCACCCTCGTGACCACCCTGTCGTACGGCATTTTGTGCTTCGCGCGCTACCCCGAACACATGAAGATGAACGACTTCTTCAAGTCCGCCATGCCCGAAGGCTACATCCAGGAGCGCACCATCTTCTTCCAGGACGACGGCAAGTACAAGACCCGTGGGGAGGTGAAGTTCGAGGGCGACACACTGGTGAACCGCATCGAGCTGAAGGGCATGGCTTTCACGGAGGAC…	1	amac12_2734	E2	43
MSKGEELFTGIVPVLIELAGDVHGHKFGVRGEGEGDADYGKLEIKFICTTGKLPVPWPTLVTTLSYGILCFARYPEHMKMNDFFKSAMPEGYIQKRTIFFQDDGKYKTRGEVKFERDTLVNRIELKGMDFKEDGNILGHKLEYNFNSHYVYIMPNKANNGLKVNFKVRHNIEGGGVQFADHDQTNVPLGDGPVLIPINHYLSCQTAIRKDRNETRDHMVFLEFFSACGHNHGRDELYK*	D18A:S27G:E94K:G115R:N148Y:D154N:I166V:L177F:Y181D:S207R:T229N:M232R	D21A:S30G:E98K:G119R:N152Y:D158N:I170V:L181F:Y185D:S214R:T237N:M240R	amac	12	12	4.0966525	4.3464394	ATGAGCAAGGGCGAGGAGCTGTTCACCGGGATCGTGCCCGTCCTGATTGAGCTGGCGGGCGACGTACACGGCCACAAGTTCGGAGTGCGCGGCGAGGGCGAGGGCGATGCCGACTACGGCAAGCTGGAGATCAAGTTCATCTGCACCACCGGCAAGCTGCCCGTGCCCTGGCCCACCCTCGTGACCACCCTGTCGTACGGCATTTTGTGCTTCGCGCGCTACCCCGAACACATGAAGATGAACGACTTCTTCAAGTCCGCCATGCCCGAAGGCTACATCCAGAAACGCACCATCTTCTTCCAGGACGACGGCAAGTACAAGACCCGTGGGGAGGTGAAGTTCGAGCGCGACACACTGGTGAACCGCATCGAGCTGAAGGGCATGGACTTCAAGGAGGAC…	1	amac12_2476	F2	19
MSKGEELFTGIVPVLIELNGDVHGHKFSVRGEGEGDADYGKLEIKCICTTGKLPVPWPTLVTSLSYGILCFARYPEHMKMNDFFKSAMPEGYIQERTIFFQDDGKYKTRGEVKFEGNTLVNRIELKGMDFKEDGNILGHKLEYNFNSHNVHIMPDQPNNGLKANFQIRHNIEGGGVQLADHYQTNVPLGDGPVLIPIHHYLSCQTAISKDRNETRDHMVFLEFFSACGHTHGLDEPYK*	D18N:F45C:T62S:D116N:Y150H:K155Q:A156P:V162A:K165Q:N197H:M232L:L235P	D21N:F48C:T65S:D120N:Y154H:K159Q:A160P:V166A:K169Q:N204H:M240L:L243P	amac	12	8	4.352699	4.4158626	ATGAGCAAGGGCGAGGAGCTGTTCACCGGGATCGTGCCCGTCCTGATTGAGCTGAACGGCGACGTACACGGCCACAAGTTCAGCGTGCGCGGCGAGGGCGAGGGCGATGCCGACTACGGCAAGCTGGAGATCAAGTGTATCTGCACCACCGGCAAGCTGCCCGTGCCCTGGCCCACCCTCGTGACCTCACTGTCGTACGGCATTTTGTGCTTCGCGCGCTACCCCGAACACATGAAGATGAACGACTTCTTCAAGTCCGCCATGCCCGAAGGCTACATCCAGGAGCGCACCATCTTCTTCCAGGACGACGGCAAGTACAAGACCCGTGGGGAGGTGAAGTTCGAGGGCAACACACTGGTGAACCGCATCGAGCTGAAGGGCATGGACTTCAAGGAGGAC…	1	amac12_3303	G2	83
MSKGEELFTRIVPVLIELDGDVHGHKFSVRGEGEGDADYGKLEIKFICTTGKLPVPWPTLVTTLSYGILCFARYPEHMKMNDFFKSAMPEGYIQERTIFFQDDGKYKTRGEVRFEGDTLVNRVELKGMDFTEDGIILGHKLEYNFNSHNVYIMPDKANNGLKVNFKVRHNIDGGGVQLADHYQTNVPLGDGPVLIPINHYLSCQSAISKDRSEARDNMVFLEFFSACGHTHGRDELYK*	G9R:K112R:I122V:K130T:N134I:I166V:E171D:T204S:N211S:T213A:H216N:M232R	G12R:K116R:I126V:K134T:N138I:I170V:E175D:T211S:N218S:T221A:H224N:M240R	amac	12	6	4.141882	4.3690596	ATGAGCAAGGGCGAGGAGCTGTTCACCCGGATCGTGCCCGTCCTGATTGAGCTGGACGGCGACGTACACGGCCACAAGTTCAGCGTGCGCGGCGAGGGCGAGGGCGATGCCGACTACGGCAAGCTGGAGATCAAGTTCATCTGCACCACCGGCAAGCTGCCCGTGCCCTGGCCCACCCTCGTGACCACCCTGTCGTACGGCATTTTGTGCTTCGCGCGCTACCCCGAACACATGAAGATGAACGACTTCTTCAAGTCCGCCATGCCCGAAGGCTACATCCAGGAGCGCACCATCTTCTTCCAGGACGACGGCAAGTACAAGACCCGTGGGGAGGTGCGTTTCGAGGGCGACACACTGGTGAACCGCGTCGAGCTGAAGGGCATGGACTTCACGGAGGAC…	1	amac12_1943	H2	6
MSKGEELFTGIVPVLIELDGDVHGHKFSVRGEGEGDADYGKLEIKFICTTGQLPVPWPTLVTTLSYGILCFARYPGHMKMNDFFKSAMPEGYIQERTIFFQDDGKYKTRGEVKFEGNTLVNRIELKGMDFKEDGNILGHKLEYNFNSHKVYIMPDKPNNGLKVNFKVRHNIEGGEVQLADHYQTNVPLGEGPVLIPSNHCLSSQTAISKDRNETRDHMVFLEFFSASGHTHGMDELYK*	K51Q:E75G:D116N:N148K:A156P:I166V:G174E:D189E:I196S:Y199C:C202S:C226S	K54Q:E78G:D120N:N152K:A160P:I170V:G178E:D193E:I203S:Y206C:C209S:C234S	amac	12	6	4.1964126	4.42607	ATGAGCAAGGGCGAGGAGCTGTTCACCGGGATCGTGCCCGTCCTGATTGAGCTGGACGGCGACGTACACGGCCACAAGTTCAGCGTGCGCGGCGAGGGCGAGGGCGATGCCGACTACGGCAAGCTGGAGATCAAGTTCATCTGCACCACCGGCCAACTGCCCGTGCCCTGGCCCACCCTCGTGACCACCCTGTCGTACGGCATTTTGTGCTTCGCGCGCTACCCCGGCCACATGAAGATGAACGACTTCTTCAAGTCCGCCATGCCCGAAGGCTACATCCAGGAGCGCACCATCTTCTTCCAGGACGACGGCAAGTACAAGACCCGTGGGGAGGTGAAGTTCGAGGGCAATACACTGGTGAACCGCATCGAGCTGAAGGGCATGGACTTCAAGGAGGAC…	1	amac12_323	A3	13
MRKGDELFTGIVPVLIELDGDVHGHKFSVRGEGEGDADYGKLEIKFICTTGKLPVPWPTLVTTLSYGILCFARYPEHMKMNDFFKSAMPEGYIQERTIFFQEDGKYKTRGEVKFEGDTLVNRIELKGMDFKEDGNILGHKLEYHFNSHNVYIIPDKANNGLKANFRIRHNIEGGGVQLADHYQTNVPLGDGPVLIPINHYVSCQTALSKDRNETRDNMVFLEFFSACGHTPGMNELYK*	S1R:E4D:D101E:N143H:M152I:V162A:K165R:L200V:I206L:H216N:H230P:D233N	S1R:E7D:D105E:N147H:M156I:V166A:K169R:L207V:I213L:H224N:H238P:D241N	amac	12	5	4.402711	4.3893332	ATGCGTAAGGGCGATGAGCTGTTCACCGGGATCGTGCCCGTCCTGATTGAGCTGGACGGCGACGTACACGGCCACAAGTTCAGCGTGCGCGGCGAGGGCGAGGGCGATGCCGACTACGGCAAGCTGGAGATCAAGTTCATCTGCACCACCGGCAAGCTGCCCGTGCCCTGGCCCACCCTCGTGACCACCCTGTCGTACGGCATTTTGTGCTTCGCGCGCTACCCCGAACACATGAAGATGAACGACTTCTTCAAGTCCGCCATGCCCGAAGGCTACATCCAGGAGCGCACCATCTTCTTCCAGGAGGACGGCAAGTACAAGACCCGTGGGGAGGTGAAGTTCGAGGGCGACACACTGGTGAACCGCATCGAGCTGAAGGGCATGGACTTCAAGGAGGAC…	1	amac12_2027	B3	92
MSKGEELFTGIVPVLIELDGDVHGHKFSVRGEGGGDADYGKLEIKCICTSGKLPVPWPTLVTTLSYGILCFARYPEHMKMNDFFKSAMPEGYIQERTIFFQDDGKYKTRGVVKFEGDTLVNRIELKGMDFKENGNILGHKLDYHFNSHNVYIMPDKANSGLKVNFKTRHNIEGGGVQFADHYQTNVPLGDGPVLIPINHYVSCQTAISKDRNETRDHMVFLEFFSACGQTHGMDELYK*	E33G:F45C:T49S:E110V:D132N:E141D:N143H:N158S:I166T:L177F:L200V:H228Q	E36G:F48C:T52S:E114V:D136N:E145D:N147H:N162S:I170T:L181F:L207V:H236Q	amac	12	5	4.4404354	4.3856754	ATGAGCAAGGGCGAGGAGCTGTTCACCGGGATCGTGCCCGTCCTGATTGAGCTGGACGGCGACGTACACGGCCACAAGTTCAGCGTGCGCGGCGAGGGCGGTGGCGATGCCGACTACGGCAAGCTGGAGATCAAGTGTATCTGCACCTCCGGCAAGCTGCCCGTGCCCTGGCCCACCCTCGTGACCACCCTGTCGTACGGCATTTTGTGCTTCGCGCGCTACCCCGAACACATGAAGATGAACGACTTCTTCAAGTCCGCCATGCCCGAAGGCTACATCCAGGAGCGCACCATCTTCTTCCAGGACGACGGCAAGTACAAGACCCGTGGGGTGGTGAAGTTCGAGGGCGACACACTGGTGAACCGCATCGAGCTGAAGGGCATGGACTTCAAGGAGAAC…	1	amac12_870	C3	42
MSKGEELFTGIVPVLIELDADVHGHKFSVRGEGEGDADYGKLEIKFICTTGKLPVPWPTLVTTLSYGILCFAHYPEHMKMNDFFKSAMPEGYIQERNIFFQEDGKYKTRGEVMFEGDTLVNRIELKGMDFQEDGNILGHKLEYHFNSHNVYIMPDKANNGLKVNFKVRLNIEGGGVLLADHYQTNVPLGDDPVLIPINHYLSCQTAISKDRNETRDHMVFLEFFSACGHIHGMDELYK*	G19A:R72H:T96N:D101E:K112M:K130Q:N143H:I166V:H168L:Q176L:G190D:T229I	G22A:R75H:T100N:D105E:K116M:K134Q:N147H:I170V:H172L:Q180L:G194D:T237I	amac	12	5	4.2489038	4.3444295	ATGAGCAAGGGCGAGGAGCTGTTCACCGGGATCGTGCCCGTCCTGATTGAGCTGGACGCTGACGTACACGGCCACAAGTTCAGCGTGCGCGGCGAGGGCGAGGGCGATGCCGACTACGGCAAGCTGGAGATCAAGTTCATCTGCACCACCGGCAAGCTGCCCGTGCCCTGGCCCACCCTCGTGACCACCCTGTCGTACGGCATTTTGTGCTTCGCGCACTACCCCGAACACATGAAGATGAACGACTTCTTCAAGTCCGCCATGCCCGAAGGCTACATCCAGGAGCGCAATATCTTCTTCCAGGAGGACGGCAAGTACAAGACCCGTGGGGAGGTGATGTTCGAGGGCGACACACTGGTGAACCGCATCGAGCTGAAGGGCATGGACTTCCAGGAGGAC…	1	amac12_2120	D3	4
MSKGEELFTGIVPVLIELAGDVHGHKFSVRGEGEGDANYGKLEIKIICTTGQLPVPWPTLVTTLSYGILCFARYPEHMKMNDFFKSAMPEGYIQERTIFFQDDGKYKTRGEVKFEGDTLVNRIELKGIDFKEDGNILGHKLEYNFNSHIVYIMPDKANNGLKVNFKTRHNIEGAGVQLADHYQTNVPLGDGAVLIPINHYLCCQSAISKDRNETRDHMVFLEFFSACGHTHGMNELYK*	D18A:D37N:F45I:K51Q:M127I:N148I:I166T:G173A:P191A:S201C:T204S:D233N	D21A:D40N:F48I:K54Q:M131I:N152I:I170T:G177A:P195A:S208C:T211S:D241N	amac	12	4	4.2298098	4.337536	ATGAGCAAGGGCGAGGAGCTGTTCACCGGGATCGTGCCCGTCCTGATTGAGCTGGCTGGCGACGTACACGGCCACAAGTTCAGCGTGCGCGGCGAGGGCGAGGGCGATGCCAACTACGGCAAGCTGGAGATCAAGATCATCTGCACCACCGGCCAGCTGCCCGTGCCCTGGCCCACCCTCGTGACCACCCTGTCGTACGGCATTTTGTGCTTCGCGCGCTACCCCGAACACATGAAGATGAACGACTTCTTCAAGTCCGCCATGCCCGAAGGCTACATCCAGGAGCGCACCATCTTCTTCCAGGACGACGGCAAGTACAAGACCCGTGGGGAGGTGAAGTTCGAGGGCGACACACTGGTGAACCGCATCGAGCTGAAGGGCATTGACTTCAAGGAGGAC…	1	amac12_12	E3	3
MSKGEELFTGIVPVLIELEGDVHGHKFSVRGEGEGDADYGKLEIKVICTTGKLPVPWPTLVTTMSYGILCFARYPEHLKMNDFFKSAMPEGYIQERTIIFQEDGKYKTRGEVKFEGDTLVNRIELKGMDFKEDGNILGHKLEYNFNSHKVYIMPDKANNGLKVNFKIRHNIEGGGVQLADHYQTNVPLREGPVLIPINHYVSCQTAIRKDRNETRDHMVFLEFFSACGNTHGMDELYK*	D18E:F45V:L63M:M77L:F98I:D101E:N148K:G188R:D189E:L200V:S207R:H228N	D21E:F48V:L66M:M80L:F102I:D105E:N152K:G192R:D193E:L207V:S214R:H236N	amac	12	3	4.3105016	4.3636503	ATGAGCAAGGGCGAGGAGCTGTTCACCGGGATCGTGCCCGTCCTGATTGAGCTGGAAGGCGACGTACACGGCCACAAGTTCAGCGTGCGCGGCGAGGGCGAGGGCGATGCCGACTACGGCAAGCTGGAGATCAAGGTCATCTGCACCACCGGCAAGCTGCCCGTGCCCTGGCCCACCCTCGTGACCACCATGTCGTACGGCATTTTGTGCTTCGCGCGCTACCCCGAACACCTTAAGATGAACGACTTCTTCAAGTCCGCCATGCCCGAAGGCTACATCCAGGAGCGCACCATCATCTTCCAGGAGGACGGCAAGTACAAGACCCGTGGGGAGGTGAAGTTCGAGGGCGACACACTGGTGAACCGCATCGAGCTGAAGGGCATGGACTTCAAGGAGGAC…	1	amac12_905	F3	21
MSKGEELFTGIVPVLIALDGDVQGHKFSVRGEGEGDADYGKLEIKFICTTGKLPVPWPTLVTTLSYGILCFAHYPEHMKMNDFFKSAMPEGYIQERTIFFQDDGKYKTRGEVKFEGNTLVNRVELKGMDFKEDGNVLGHKLEYNFNSHIVYIMPDKANNGLKVNFKIRLNIEGGGVQIADHYQTNVPLGDGPVLIPINHYLSCQTDISKDRNETRDHMVFLEFFSACGHTHGRVELYK*	E16A:H22Q:R72H:D116N:I122V:I135V:N148I:H168L:L177I:A205D:M232R:D233V	E19A:H25Q:R75H:D120N:I126V:I139V:N152I:H172L:L181I:A212D:M240R:D241V	amac	12	3	4.006703	4.363131	ATGAGCAAGGGCGAGGAGCTGTTCACCGGGATCGTGCCCGTCCTGATTGCGCTGGACGGCGACGTACAAGGCCACAAGTTCAGCGTGCGCGGCGAGGGCGAGGGCGATGCCGACTACGGCAAGCTGGAGATCAAGTTCATCTGCACCACCGGCAAGCTGCCCGTGCCCTGGCCCACCCTCGTGACCACCCTGTCGTACGGCATTTTGTGCTTCGCGCACTACCCCGAACACATGAAGATGAACGACTTCTTCAAGTCCGCCATGCCCGAAGGCTACATCCAGGAGCGCACCATCTTCTTCCAGGACGACGGCAAGTACAAGACCCGTGGGGAGGTGAAGTTCGAGGGCAACACACTGGTGAACCGCGTCGAGCTGAAGGGCATGGACTTCAAGGAGGAC…	1	amac12_1853	G3	18
MSKGEELFTGIVPVLIELDADVHGHKFSVRGEGEGDADYGKLEIKFICTTGKLPVPWPTLVTTLSYGVLCFARYPEHMKMNDFFKSAMPEGYIQERTIIFQDDGKYKTRGEVKFEGDTLVNRVELKGMDFKENGNILGRKLEYNFNSHNVYIMPDKANNGLKVNFKVRHNIEGGGLQLADHYQTNVPLGDGPVLIPINHYLSCQTDLSKDRNETRDHMVILEFFSACGHTHGMDDLYK*	G19A:I67V:F98I:I122V:D132N:H138R:I166V:V175L:A205D:I206L:F219I:E234D	G22A:I70V:F102I:I126V:D136N:H142R:I170V:V179L:A212D:I213L:F227I:E242D	amac	12	2	4.1456027	4.2941504	ATGAGCAAGGGCGAGGAGCTGTTCACCGGGATCGTGCCCGTCCTGATTGAGCTGGACGCGGACGTACACGGCCACAAGTTCAGCGTGCGCGGCGAGGGCGAGGGCGATGCCGACTACGGCAAGCTGGAGATCAAGTTCATCTGCACCACCGGCAAGCTGCCCGTGCCCTGGCCCACCCTCGTGACCACCCTGTCGTACGGCGTGTTGTGCTTCGCGCGCTACCCCGAACACATGAAGATGAACGACTTCTTCAAGTCCGCCATGCCCGAAGGCTACATCCAGGAGCGCACCATCATTTTCCAGGACGACGGCAAGTACAAGACCCGTGGGGAGGTGAAGTTCGAGGGCGACACACTGGTGAACCGCGTTGAGCTGAAGGGCATGGACTTCAAGGAGAAC…	1	amac12_1034	H3	59
MSKGEELFTGIVPVLIDLDGDVHGNKFRVRGEGAGDADYGKLEIKCICTTGQLPVPWPTLVTTLSYGILCFARYPEHMKMNDFFKSAMPQGYIQKRTIFFQDDGKYKTRGEVKFEGDTLVNRIELKGMYFKEDGNILGHKLEYNFNSHKVYIMPDKPNNGLKANFKVRHNIEGGGVLLADHYQTNVPLGDGRVLIPINHYLSCQTAISKDRNETRDHMVFLEFFSAWGHNNGMDELYK*	E16D:H24N:S27R:E33A:F45C:K51Q:E89Q:E94K:D128Y:N148K:A156P:V162A:I166V:Q176L:P191R:C226W:T229N:H230N	E19D:H27N:S30R:E36A:F48C:K54Q:E93Q:E98K:D132Y:N152K:A160P:V166A:I170V:Q180L:P195R:C234W:T237N:H238N	amac	18	16	4.2473235	4.4559417	ATGAGCAAGGGCGAGGAGCTGTTCACCGGGATCGTGCCCGTCCTGATTGATCTGGACGGCGACGTACACGGCAACAAGTTCCGTGTGCGCGGCGAGGGCGCCGGCGATGCCGACTACGGCAAGCTGGAGATCAAGTGTATCTGCACCACCGGCCAACTGCCCGTGCCCTGGCCCACCCTCGTGACCACCCTGTCGTACGGCATTTTGTGCTTCGCGCGCTACCCCGAACACATGAAGATGAACGACTTCTTCAAGTCCGCCATGCCCCAGGGCTACATCCAGAAGCGCACCATCTTCTTCCAGGACGACGGCAAGTACAAGACCCGTGGGGAGGTGAAGTTCGAGGGCGACACACTGGTGAACCGCATCGAGCTGAAGGGCATGTATTTCAAGGAGGAC…	1	amac18_6075	A4	27
MSKGEELFTGIVPVLIALDGDVHGHKFSVRGEGEGDADYGKLEIKCICTTGKLPVPWPTLVTTLSYGILCFARYPEHMKRNDFFKSAMPEGYIQERTIFFQDDGKYKTRGEVKFEGDILVNRIELKGMDFKEDGNILGNKLEYYFNSHKVYIMPDKTNNGLKVNFKVRHNIEGGAVQFADHYQRNVPLGDGPVLIPISHYLSCQTAISKDRNEIRDHMVFLECFSACGHTHGTGEPYK*	E16A:F45C:M79R:T117I:H138N:N143Y:N148K:A156T:I166V:G174A:L177F:T183R:N197S:T213I:F222C:M232T:D233G:L235P	E19A:F48C:M82R:T121I:H142N:N147Y:N152K:A160T:I170V:G178A:L181F:T187R:N204S:T221I:F230C:M240T:D241G:L243P	amac	18	16	4.286267	4.4767	ATGAGCAAGGGCGAGGAGCTGTTCACCGGGATCGTGCCCGTCCTGATTGCTCTGGACGGCGACGTACACGGCCACAAGTTCAGCGTGCGCGGCGAGGGCGAGGGCGATGCCGACTACGGCAAGCTGGAGATCAAGTGTATCTGCACCACCGGCAAGCTGCCCGTGCCCTGGCCCACCCTCGTGACCACCCTGTCGTACGGCATTTTGTGCTTCGCGCGCTACCCCGAACACATGAAGCGTAACGACTTCTTCAAGTCCGCCATGCCCGAAGGCTACATCCAGGAGCGCACCATCTTCTTCCAGGACGACGGCAAGTACAAGACCCGTGGGGAGGTGAAGTTCGAGGGCGACATACTGGTGAACCGCATCGAGCTGAAGGGCATGGACTTCAAGGAGGAC…	1	amac18_5643	B4	19
MSKGEELFTGIVPVLIELNGDVHGHKFSVRGEGEGDADYGKLEIKFICTTGTLPVPWPTLVTTLSYGILCFARYPEHMKRNDFFKSAMPEGYIQERTIFFQDDGKYMTHGEVKFEGATLVNRIELKGMAFKEDGNILGHKLEYNFNSHHVYIMPDKANNGLKANFKVRHNIEGDRVQLADHHQTNVPLGDGHVLIPIHHYLSCQTAISKDRNETRDHMVFLEFFSARGHTNGMDELHK*	D18N:K51T:M79R:K106M:R108H:D116A:D128A:N148H:V162A:I166V:G173D:G174R:Y181H:P191H:N197H:C226R:H230N:Y236H	D21N:K54T:M82R:K110M:R112H:D120A:D132A:N152H:V166A:I170V:G177D:G178R:Y185H:P195H:N204H:C234R:H238N:Y244H	amac	18	15	4.1583676	4.301465	ATGAGCAAGGGCGAGGAGCTGTTCACCGGGATCGTGCCCGTCCTGATTGAGCTGAACGGCGACGTACACGGCCACAAGTTCAGCGTGCGCGGCGAGGGCGAGGGCGATGCCGACTACGGCAAGCTGGAGATCAAGTTCATCTGCACCACCGGCACTCTGCCCGTGCCCTGGCCCACCCTCGTGACCACCCTGTCGTACGGCATTTTGTGCTTCGCGCGCTACCCCGAACACATGAAGCGCAACGACTTCTTCAAGTCCGCCATGCCCGAAGGCTACATCCAGGAGCGCACCATCTTCTTCCAGGACGACGGCAAGTACATGACCCATGGGGAGGTGAAGTTCGAGGGCGCAACACTGGTGAACCGCATCGAGCTGAAGGGCATGGCTTTCAAGGAGGAC…	1	amac18_5980	C4	5
MSKGEELFTGIVPVLIALDGDVHGHKFSVRGEGKGDADYGKLEIKFICTTGKLPVPWPTLVTTMSYGILCFARYPAHIKMNDFFKSAMPEGYIQERTIFFQDDGKYRTHGEVKFEGDTLVNRIELKGMDFKDDGNILGHKMEYNFNSHKVYIMPDKPNNGLKVNFRVRHNIEGGGVQFADHYQTNVPLGDGPVLIPINHYLSSRTAISKDRNETRDNMVFLEFFSACGHTHGMDEMYK*	E16A:E33K:L63M:E75A:M77I:K106R:R108H:E131D:L140M:N148K:A156P:K165R:I166V:L177F:C202S:Q203R:H216N:L235M	E19A:E36K:L66M:E78A:M80I:K110R:R112H:E135D:L144M:N152K:A160P:K169R:I170V:L181F:C209S:Q210R:H224N:L243M	amac	18	9	4.328246	4.4973407	ATGAGCAAGGGCGAGGAGCTGTTCACCGGGATCGTGCCCGTCCTGATTGCACTGGACGGCGACGTACACGGCCACAAGTTCAGCGTGCGCGGCGAGGGCAAAGGCGATGCCGACTACGGCAAGCTGGAGATCAAGTTCATCTGCACCACCGGCAAGCTGCCCGTGCCCTGGCCCACCCTCGTGACCACCATGTCGTACGGCATTTTGTGCTTCGCGCGCTACCCCGCTCACATCAAGATGAACGACTTCTTCAAGTCCGCCATGCCCGAAGGCTACATCCAGGAGCGCACCATCTTCTTCCAGGACGACGGCAAGTACCGTACCCATGGGGAGGTGAAGTTCGAGGGCGACACACTGGTGAACCGCATCGAGCTGAAGGGCATGGACTTCAAGGATGAC…	1	amac18_2893	D4	3
MTKGEELFTGIVPVMIELNGDVHGHKFSVRGEGEGDADYGKLEIKVICTTGKLPVPWPTLVTTMSYGILCFARYPEHMKLNDFFKSAMPEGYIQERTIFFQDDGKYKTRGEVKFEGDTLVNRVELKGMDFKEAGNILGRKLEYSFNSHKVYIMPDKPNNGLKVNFKIRHNIEGGGVQLADHDQTNVPLGDGPVLMPINHYLSSQTALRKDLNETRDHMVFLEFFSACGHTHGMDELYK*	S1T:L14M:D18N:F45V:L63M:M79L:I122V:D132A:H138R:N143S:N148K:A156P:Y181D:I194M:C202S:I206L:S207R:R210L	S1T:L17M:D21N:F48V:L66M:M82L:I126V:D136A:H142R:N147S:N152K:A160P:Y185D:I198M:C209S:I213L:S214R:R217L	amac	18	8	4.391338	4.6315603	ATGACAAAGGGCGAGGAGCTGTTCACCGGGATCGTGCCCGTCATGATTGAGCTGAATGGCGACGTACACGGCCACAAGTTCAGCGTGCGCGGCGAGGGCGAGGGCGATGCCGACTACGGCAAGCTGGAGATCAAGGTAATCTGCACCACCGGCAAGCTGCCCGTGCCCTGGCCCACCCTCGTGACCACCATGTCGTACGGCATTTTGTGCTTCGCGCGCTACCCCGAACACATGAAGCTCAACGACTTCTTCAAGTCCGCCATGCCCGAAGGCTACATCCAGGAGCGCACCATCTTCTTCCAGGACGACGGCAAGTACAAGACCCGTGGGGAGGTGAAGTTCGAGGGCGACACACTGGTGAACCGCGTGGAGCTGAAGGGCATGGACTTCAAGGAGGCG…	1	amac18_3015	E4	14
MSKGEELFTGIVPVLIELDADVHGHKFSVRGEGEGDAHYGKLEIKFICTTGTLPVPWPTIVTTLSYGILCFAHYPEHMKMNDFFKSAMPEGYIQERTIFFQDDGKYKTRGEVKFEGDTLVNRVVLKGMDIKEDGNILGHKLEYNFNSHKVYIMPDRANNGLKVNFKIRHNIEGGGVQFAEHYQTNVPLGDAPVLMPINHYVSCQTAISKDRNETRDHMVLLEVFSACGHPHGMDELYK*	G19A:D37H:K51T:L59I:R72H:I122V:E123V:F129I:N148K:K155R:L177F:D179E:G190A:I194M:L200V:F219L:F222V:T229P	G22A:D40H:K54T:L62I:R75H:I126V:E127V:F133I:N152K:K159R:L181F:D183E:G194A:I198M:L207V:F227L:F230V:T237P	amac	18	7	4.172067	4.379923	ATGAGCAAGGGCGAGGAGCTGTTCACCGGGATCGTGCCCGTCCTGATTGAGCTGGACGCGGACGTACACGGCCACAAGTTCAGCGTGCGCGGCGAGGGCGAGGGCGATGCCCACTACGGCAAGCTGGAGATCAAGTTCATCTGCACCACCGGCACACTGCCCGTGCCCTGGCCCACCATTGTGACCACCCTGTCGTACGGCATTTTGTGCTTCGCGCATTACCCCGAACACATGAAGATGAACGACTTCTTCAAGTCCGCCATGCCCGAAGGCTACATCCAGGAGCGCACCATCTTCTTCCAGGACGACGGCAAGTACAAGACCCGTGGGGAGGTGAAGTTCGAGGGCGACACACTGGTGAACCGCGTAGTCCTGAAGGGCATGGACATCAAGGAGGAC…	1	amac18_3581	F4	85
MSKGKELFTGIVPVLIELAGDVHGHKFSVRGEGEGDADYGKLEIKFICTAGKLPVPWPTLVTTLSYGILCFARYPAHMKRNDFFKSAMPEGYIQERTIFFQDDGKYKTRGEVKFEGDTLVNRIELKGMDFKEDGNILGHKLEYHFNSHIVYIMPDKANNGLKGNFKTRHNIKGGGVQLADHDQANVPLADGPVLIPINHYLSCQTAISKDRNEIRDHMVFLEFFIACGHTPGMNELCK*	E4K:D18A:T49A:E75A:M79R:N143H:N148I:V162G:I166T:E171K:Y181D:T183A:G188A:T213I:S224I:H230P:D233N:Y236C	E7K:D21A:T52A:E78A:M82R:N147H:N152I:V166G:I170T:E175K:Y185D:T187A:G192A:T221I:S232I:H238P:D241N:Y244C	amac	18	7	4.1712704	4.5442348	ATGAGCAAGGGCAAAGAGCTGTTCACCGGGATCGTGCCCGTCCTGATTGAGCTGGCAGGCGACGTACACGGCCACAAGTTCAGCGTGCGCGGCGAGGGCGAGGGCGATGCCGACTACGGCAAGCTGGAGATCAAGTTCATCTGCACCGCGGGCAAGCTGCCCGTGCCCTGGCCCACCCTCGTGACCACCCTGTCGTACGGCATTTTGTGCTTCGCGCGCTACCCCGCGCACATGAAGCGGAACGACTTCTTCAAGTCCGCCATGCCCGAAGGCTACATCCAGGAGCGCACCATCTTCTTCCAGGACGACGGCAAGTACAAGACCCGTGGGGAGGTGAAGTTCGAGGGCGACACACTGGTGAACCGCATCGAGCTGAAGGGCATGGACTTCAAGGAGGAC…	1	amac18_4124	G4	4
MSKGEDLFTGIVPVLIELDGDVHGRKFSVRGEGEGVADYGKLEIKCICTTGKLPVPWPTLVTTLSYGILCFARYPEHMKMNDFFKSAMPEGYIQERTIFFQDDGKYKTRGEVKFEGDTLVNRVALKGMDFKENGNILGHKLEYNFNSHTVYIMPDQANNGLKGNFKVRLNIEGGGVQLADHYQTNVPLGDGPVLIPINHYVSCQTVLSKDLNETRDHMVFLEFFSACGHSHGRDELYK*	E5D:H24R:D35V:F45C:I122V:E123A:D132N:N148T:K155Q:V162G:I166V:H168L:L200V:A205V:I206L:R210L:T229S:M232R	E8D:H27R:D38V:F48C:I126V:E127A:D136N:N152T:K159Q:V166G:I170V:H172L:L207V:A212V:I213L:R217L:T237S:M240R	amac	18	7	4.611443	4.7058563	ATGAGCAAGGGCGAGGATCTGTTCACCGGGATCGTGCCCGTCCTGATTGAGCTGGACGGCGACGTACACGGCCGTAAGTTCAGCGTGCGCGGCGAGGGCGAGGGCGTCGCCGACTACGGCAAGCTGGAGATCAAGTGCATCTGCACCACCGGCAAGCTGCCCGTGCCCTGGCCCACCCTCGTGACCACCCTGTCGTACGGCATTTTGTGCTTCGCGCGCTACCCCGAACACATGAAGATGAACGACTTCTTCAAGTCCGCCATGCCCGAAGGCTACATCCAGGAGCGCACCATCTTCTTCCAGGACGACGGCAAGTACAAGACCCGTGGGGAGGTGAAGTTCGAGGGCGACACACTGGTGAACCGCGTGGCGCTGAAGGGCATGGACTTCAAGGAGAAC…	1	amac18_3136	H4	37
MSKGEELFTGIVPVLIKLDGDVHGHKFSVRGEGEGDADYGKLEVKVICTTGKLPVPWPTLVTTLSYGILCFARYPEHMKMNDFFKSAMPEGYIQERNIFFQDDGKYKTRGAVKFEGATLVNRVELKGMDFKEDGNILGHKMEYNFNSHKVYIMPDKTNNGLKVNFKTRHNIEGAGVQLADHHQTNVPLGDGPVLIPVSHYLSCQSALSKDRDETRDHMVFLEFFSACGHTHGMDELYK*	E16K:I43V:F45V:T96N:E110A:D116A:I122V:L140M:N148K:A156T:I166T:G173A:Y181H:I196V:N197S:T204S:I206L:N211D	E19K:I46V:F48V:T100N:E114A:D120A:I126V:L144M:N152K:A160T:I170T:G177A:Y185H:I203V:N204S:T211S:I213L:N218D	amac	18	7	4.511869	4.6089334	ATGAGCAAGGGCGAGGAGCTGTTCACCGGGATCGTGCCCGTCCTGATTAAGCTGGACGGCGACGTACACGGCCACAAGTTCAGCGTGCGCGGCGAGGGCGAGGGCGATGCCGACTACGGCAAGCTGGAGGTGAAGGTAATCTGCACCACCGGCAAGCTGCCCGTGCCCTGGCCCACCCTCGTGACCACCCTGTCGTACGGCATTTTGTGCTTCGCGCGCTACCCCGAACACATGAAGATGAACGACTTCTTCAAGTCCGCCATGCCCGAAGGCTACATCCAGGAGCGCAATATCTTCTTCCAGGACGACGGCAAGTACAAGACCCGTGGGGCGGTGAAGTTCGAGGGCGCCACACTGGTGAACCGCGTGGAGCTGAAGGGCATGGACTTCAAGGAGGAC…	1	amac18_4854	A5	4
MSKGEELFTGIVPVLIELNGNVHGHKFTVRGEGEGDADYGKLEIKFICTTGQLPVPWPTLVTTLSYGILCFARYPEHMKMNDFFKSAMPEGYIQERTIFFQDDGKYKTRGEVKFEGDKLVNRIELKGTDFKDDGNILGHKLEYYFNSHNVYIMPDKANNGLKGNFTVRHNIQGGGVQLADHCQTNVPLGDGPVLIPINHYLRCQTAVSKDRDETRDHMVILEFFSACGNTHGMDELYK*	D18N:D20N:S27T:K51Q:T117K:M127T:E131D:N143Y:V162G:K165T:I166V:E171Q:Y181C:S201R:I206V:N211D:F219I:H228N	D21N:D23N:S30T:K54Q:T121K:M131T:E135D:N147Y:V166G:K169T:I170V:E175Q:Y185C:S208R:I213V:N218D:F227I:H236N	amac	18	6	4.2389555	4.581801	ATGAGCAAGGGCGAGGAGCTGTTCACCGGGATCGTGCCCGTCCTGATTGAGCTGAACGGCAATGTACACGGCCACAAGTTCACGGTGCGCGGCGAGGGCGAGGGCGATGCCGACTACGGCAAGCTGGAGATCAAGTTCATCTGCACCACCGGCCAGCTGCCCGTGCCCTGGCCCACCCTCGTGACCACCCTGTCGTACGGCATTTTGTGCTTCGCGCGCTACCCCGAACACATGAAGATGAACGACTTCTTCAAGTCCGCCATGCCCGAAGGCTACATCCAGGAGCGCACCATCTTCTTCCAGGACGACGGCAAGTACAAGACCCGTGGGGAGGTGAAGTTCGAGGGCGACAAACTGGTGAACCGCATCGAGCTGAAGGGCACCGACTTCAAGGACGAC…	1	amac18_902	B5	29
MSKGEELFTGIVPVLIELNGDVHGHKFSVRGEGEGDADYGKLEIKVICTTGKLPVPWPTLVTTLSYGILCFARYPEHMKKNDFFKSAMPAGYIQERAIIFQDDGKYKTRGEVKFEGDTLVNRIELKGMDFKEDGNILGHKLEYNFNSHIVYIMPDKANNGLRGNFRVRHNIEGGGVQLADHYQTNVPLGDGPVRIPVNHYVSCQTAVSKDRNETRDHMVILEFFSACGHTLGMDELYN*	D18N:F45V:M79K:E89A:T96A:F98I:N148I:K161R:V162G:K165R:I166V:L193R:I196V:L200V:I206V:F219I:H230L:K237N	D21N:F48V:M82K:E93A:T100A:F102I:N152I:K165R:V166G:K169R:I170V:L197R:I203V:L207V:I213V:F227I:H238L:K245N	amac	18	5	4.478179	4.570507	ATGAGCAAGGGCGAGGAGCTGTTCACCGGGATCGTGCCCGTCCTGATTGAGCTGAATGGCGACGTACACGGCCACAAGTTCAGCGTGCGCGGCGAGGGCGAGGGCGATGCCGACTACGGCAAGCTGGAGATCAAGGTCATCTGCACCACCGGCAAGCTGCCCGTGCCCTGGCCCACCCTCGTGACCACCCTGTCGTACGGCATTTTGTGCTTCGCGCGCTACCCCGAACACATGAAGAAGAACGACTTCTTCAAGTCCGCCATGCCCGCGGGCTACATCCAGGAGCGCGCAATCATTTTCCAGGACGACGGCAAGTACAAGACCCGTGGGGAGGTGAAGTTCGAGGGCGACACACTGGTGAACCGCATCGAGCTGAAGGGCATGGACTTCAAGGAGGAC…	1	amac18_2488	C5	43
MSKGEELFTGIVPVLIELEGDVHGHKFSVRGEGEGDADYGKLEVKFICTTGKLPVPWPTIVTTMSYGILCFARYPKHMKMNDFFKSAMPDGYIQERTIIFQDDGKYKTRGEVKFEGDTLVNRIDLKGMGFKEDGNILGHKLEYHFNSHIVNIMPDKANNGLKANFKIRHNIEGGGVQLADHYQTNVPLGDGPVLIPINHYLSSKTAISKDRNEIRDHMVFLEFFSACGNTHGVDELYK*	D18E:I43V:L59I:L63M:E75K:E89D:F98I:E123D:D128G:N143H:N148I:Y150N:V162A:C202S:Q203K:T213I:H228N:M232V	D21E:I46V:L62I:L66M:E78K:E93D:F102I:E127D:D132G:N147H:N152I:Y154N:V166A:C209S:Q210K:T221I:H236N:M240V	amac	18	4	4.2328706	4.379532	ATGAGCAAGGGCGAGGAGCTGTTCACCGGGATCGTGCCCGTCCTGATTGAGCTGGAGGGCGACGTACACGGCCACAAGTTCAGCGTGCGCGGCGAGGGCGAGGGCGATGCCGACTACGGCAAGCTGGAGGTCAAGTTCATCTGCACCACCGGCAAGCTGCCCGTGCCCTGGCCCACCATAGTGACCACCATGTCGTACGGCATTTTGTGCTTCGCGCGCTACCCCAAACACATGAAGATGAACGACTTCTTCAAGTCCGCCATGCCCGATGGCTACATCCAGGAGCGCACCATCATCTTCCAGGACGACGGCAAGTACAAGACCCGTGGGGAGGTGAAGTTCGAGGGCGACACACTGGTGAACCGCATCGATCTGAAGGGCATGGGTTTCAAGGAGGAC…	1	amac18_3756	D5	34
MSKGEELFTGIVPVLIELNGDVHGHKFSVHGEGEGDADYGKLEIKCICAAGQLPVPWPTLVTTLSYGILCFARYPEHMKMNDFFKSAMPQGYIQKRTIFFQDDGRYKTRGEVKFEGDTLVNRIGLKGMDFKEDGYILGHKMEYNFNSHKVYIMPDQANNGLKVNFKVRHNIDGGGVQLADHDQTNFPLGDGSVLIPFNHYLRSQSAISKDRNETRDHMVFLEFFSACGHTHGMDELYE*	D18N:R29H:F45C:T48A:T49A:K51Q:E89Q:E94K:K104R:E123G:N134Y:L140M:N148K:K155Q:I166V:E171D:Y181D:V185F:P191S:I196F:S201R:C202S:T204S:K237E	D21N:R32H:F48C:T51A:T52A:K54Q:E93Q:E98K:K108R:E127G:N138Y:L144M:N152K:K159Q:I170V:E175D:Y185D:V189F:P195S:I203F:S208R:C209S:T211S:K245E	amac	24	22	4.297489	4.666936	ATGAGCAAGGGCGAGGAGCTGTTCACCGGGATCGTGCCCGTCCTGATTGAGCTGAATGGCGACGTACACGGCCACAAGTTCAGCGTGCATGGCGAGGGCGAGGGCGATGCCGACTACGGCAAGCTGGAGATCAAGTGTATCTGCGCGGCTGGCCAGCTGCCCGTGCCCTGGCCCACCCTCGTGACCACCCTGTCGTACGGCATTTTGTGCTTCGCGCGCTACCCCGAACACATGAAGATGAACGACTTCTTCAAGTCCGCCATGCCCCAAGGCTACATCCAGAAACGCACCATCTTCTTCCAGGACGACGGCCGCTACAAGACCCGTGGGGAGGTGAAGTTCGAGGGCGACACACTGGTGAACCGCATCGGCCTGAAGGGCATGGACTTCAAGGAGGAC…	1	amac24_3005	E5	4
MSKGEELFTGIVPVLIELDGDVHGHKFSVRGEGAGDAGYGKLEIKFICTTGTLPVPWPTLVTTLSYGILCFARYPEHMKMNDFFKSAMPEGYLQERTIYFQDDGKYKTRGEVKFEGATLVNRVELKGMDFKEDGNILGHKLEYNFNSHKVYIKPNTAINGLKVNFKVRHNIEGDVVQLAGHDQRNFPLGDGPVLIPINHYVSCQTAISKDRNETRDHMVFLEFFSACGHTNGRDERYN*	E33A:D37G:K51T:I92L:F98Y:D116A:I122V:N148K:M152K:D154N:K155T:N157I:I166V:G173D:G174V:D179G:Y181D:T183R:V185F:L200V:H230N:M232R:L235R:K237N	E36A:D40G:K54T:I96L:F102Y:D120A:I126V:N152K:M156K:D158N:K159T:N161I:I170V:G177D:G178V:D183G:Y185D:T187R:V189F:L207V:H238N:M240R:L243R:K245N	amac	24	21	4.10839	4.5051475	ATGAGCAAGGGCGAGGAGCTGTTCACCGGGATCGTGCCCGTCCTGATTGAGCTGGACGGCGACGTACACGGCCACAAGTTCAGCGTGCGCGGCGAGGGCGCAGGCGATGCCGGTTACGGCAAGCTGGAGATCAAGTTCATCTGCACCACCGGCACTCTGCCCGTGCCCTGGCCCACCCTCGTGACCACCCTGTCGTACGGCATTTTGTGCTTCGCGCGCTACCCCGAACACATGAAGATGAACGACTTCTTCAAGTCCGCCATGCCCGAAGGCTACCTTCAGGAGCGCACCATCTACTTCCAGGACGACGGCAAGTACAAGACCCGTGGGGAGGTGAAGTTCGAGGGCGCGACACTGGTGAACCGCGTGGAGCTGAAGGGCATGGACTTCAAGGAGGAC…	1	amac24_3834	F5	4
MRKGEELFTGIVPVLIELNGDVHGHKFSVRGEGEGDSDYGKLEIKCICTTGKLPVPWPTLVTTLSYGILCFARYPEHMKTNDFFKSAMPQGYIQERTIFFQDDGKYRTRGAVKFEGDTLVNRIVLKGMAFKEAGNILGHKLEYNFNSHNVYIMPDQDNNGLKVNFKVRHNIEGAGVKFADHYQANLPLGDGPVLIPIHHYLSCQTAISKDRNEIRDHMVFLECFSACGHTHGRDELYE*	S1R:D18N:A36S:F45C:M79T:E89Q:K106R:E110A:E123V:D128A:D132A:K155Q:A156D:I166V:G173A:Q176K:L177F:T183A:V185L:N197H:T213I:F222C:M232R:K237E	S1R:D21N:A39S:F48C:M82T:E93Q:K110R:E114A:E127V:D132A:D136A:K159Q:A160D:I170V:G177A:Q180K:L181F:T187A:V189L:N204H:T221I:F230C:M240R:K245E	amac	24	21	4.1632905	4.5198555	ATGCGTAAGGGCGAGGAGCTGTTCACCGGGATCGTGCCCGTCCTGATTGAGCTGAACGGCGACGTACACGGCCACAAGTTCAGCGTGCGCGGCGAGGGCGAGGGCGATAGCGACTACGGCAAGCTGGAGATCAAGTGTATCTGCACCACCGGCAAGCTGCCCGTGCCCTGGCCCACCCTCGTGACCACCCTGTCGTACGGCATTTTGTGCTTCGCGCGCTACCCCGAACACATGAAAACCAACGACTTCTTCAAGTCCGCCATGCCCCAGGGCTACATCCAGGAGCGCACCATCTTCTTCCAGGACGACGGCAAGTACCGGACCCGTGGGGCCGTGAAGTTCGAGGGCGACACACTGGTGAACCGCATCGTTCTGAAGGGCATGGCTTTCAAGGAGGCT…	1	amac24_4027	G5	3
MSKGEELFTGIVPVLIELNGDVHGHQFSVRGEGEGDADYGKLEIKCICTTGQLPVPWPTLVTTLSYGILCFARYPEQMKMNDFFKSAMPEGYIQERTIFFQDDGRYKTRGEVKFEGDTLVNRIGLKGMDIKEDGNILGHKMEYNFNSHKVYIMPDQTNNGLKVNFKVRHNIEGGGVLLADHDQRNVPLGDGPVLIPINHYLSSQSAISKDRNESRDHMVILEFFSACAHSYGMDEMYK*	D18N:K25Q:F45C:K51Q:H76Q:K104R:E123G:F129I:L140M:N148K:K155Q:A156T:I166V:Q176L:Y181D:T183R:C202S:T204S:T213S:F219I:G227A:T229S:H230Y:L235M	D21N:K28Q:F48C:K54Q:H79Q:K108R:E127G:F133I:L144M:N152K:K159Q:A160T:I170V:Q180L:Y185D:T187R:C209S:T211S:T221S:F227I:G235A:T237S:H238Y:L243M	amac	24	19	4.239245	4.686161	ATGAGCAAGGGCGAGGAGCTGTTCACCGGGATCGTGCCCGTCCTGATTGAGCTGAACGGCGACGTACACGGCCACCAATTCAGCGTGCGCGGCGAGGGCGAGGGCGATGCCGACTACGGCAAGCTGGAGATCAAGTGTATCTGCACCACCGGCCAACTGCCCGTGCCCTGGCCCACCCTCGTGACCACCCTGTCGTACGGCATTTTGTGCTTCGCGCGCTACCCCGAACAAATGAAGATGAACGACTTCTTCAAGTCCGCCATGCCCGAAGGCTACATCCAGGAGCGCACCATCTTCTTCCAGGACGACGGCCGCTACAAGACCCGTGGGGAGGTGAAGTTCGAGGGCGACACACTGGTGAACCGCATCGGCCTGAAGGGCATGGACATTAAGGAGGAC…	1	amac24_3000	H5	3
MSKGEELFTGIVPVLIALDGDVHGRKFSVRGEGEGDADYGKLEIKCICTTGQLPVPWPTLVTTLSYGILCFARYPEHMKMNDFFKSAMPQGYVQERAIFFQDDGQYMTRGEVMFEGDTLVNRVELKGMDFQEDGNILGHKLEYNFNSHKVYITPDKANNGLKVNFKTRHNIEGGGLQLADHYQTNIPLGDGPVLIPINHYLSSQTSLSKERDETRDHMVFLEFFRACGHTHGRDELYK*	E16A:H24R:F45C:K51Q:E89Q:I92V:T96A:K104Q:K106M:K112M:I122V:K130Q:N148K:M152T:I166T:V175L:V185I:C202S:A205S:I206L:D209E:N211D:S224R:M232R	E19A:H27R:F48C:K54Q:E93Q:I96V:T100A:K108Q:K110M:K116M:I126V:K134Q:N152K:M156T:I170T:V179L:V189I:C209S:A212S:I213L:D216E:N218D:S232R:M240R	amac	24	14	4.2425127	4.5616255	ATGAGCAAGGGCGAGGAGCTGTTCACCGGGATCGTGCCCGTCCTGATTGCCCTGGACGGCGACGTACACGGCCGTAAGTTCAGCGTGCGCGGCGAGGGCGAGGGCGATGCCGACTACGGCAAGCTGGAGATCAAGTGTATCTGCACCACCGGCCAGCTGCCCGTGCCCTGGCCCACCCTCGTGACCACCCTGTCGTACGGCATTTTGTGCTTCGCGCGCTACCCCGAACACATGAAGATGAACGACTTCTTCAAGTCCGCCATGCCCCAAGGCTACGTTCAGGAGCGCGCCATCTTCTTCCAGGACGACGGCCAGTACATGACCCGTGGGGAGGTGATGTTCGAGGGCGACACACTGGTGAACCGCGTCGAGCTGAAGGGCATGGACTTCCAAGAGGAC…	1	amac24_1262	A6	4
MNKGEELFTGIVPVLIELNGDVQGHKFSVRGEGEGDADYGKLEIKVICTTGTLPVPWPTLVTTLSYGILCFARYPEHMKMNDFFKSAMPEGYIQERTIFFQDDGTYKTRGEVKFEGDTLVNRIELKGMDFKEEGNILGHKLDYNFNSHNVYIVPDKANNGLEANFKVRLNIEGGEVQLADHYQANFPLADGPVLIPINHYVRCQTTISKDRNETRDNMVFLEVFSACGHIHGMDEPYK*	S1N:D18N:H22Q:F45V:K51T:K104T:D132E:E141D:M152V:K161E:V162A:I166V:H168L:G174E:T183A:V185F:G188A:L200V:S201R:A205T:H216N:F222V:T229I:L235P	S1N:D21N:H25Q:F48V:K54T:K108T:D136E:E145D:M156V:K165E:V166A:I170V:H172L:G178E:T187A:V189F:G192A:L207V:S208R:A212T:H224N:F230V:T237I:L243P	amac	24	13	4.1808047	4.6494713	ATGAACAAGGGCGAGGAGCTGTTCACCGGGATCGTGCCCGTCCTGATTGAGCTGAATGGCGACGTACAGGGCCACAAGTTCAGCGTGCGCGGCGAGGGCGAGGGCGATGCCGACTACGGCAAGCTGGAGATCAAGGTGATCTGCACCACCGGCACACTGCCCGTGCCCTGGCCCACCCTCGTGACCACCCTGTCGTACGGCATTTTGTGCTTCGCGCGCTACCCCGAACACATGAAGATGAACGACTTCTTCAAGTCCGCCATGCCCGAAGGCTACATCCAGGAGCGCACCATCTTCTTCCAGGACGACGGCACGTACAAGACCCGTGGGGAGGTGAAGTTCGAGGGCGACACACTGGTGAACCGCATCGAGCTGAAGGGCATGGACTTCAAGGAGGAG…	1	amac24_2442	B6	3
MSKCEELFTGTVPVRIKLNGDVHGHKFSVRGEGAGDADYGKLEIKCICTTGKLPVPWPTLVTTLSYGILCFARYPEHMTMNDFFKSTMPEGYIQERTIFFQEDGKYKTRGEVKFEGDTLVNRIELKGMDFKEDGYILGHKLEYNFNSHKVYVMPDQGNNGLKGNFTVRHNIEGGVVQLADHYQANVPLGDGPVLIPINHYLSCQTAISKVCNETRDHMVFLEVFSACGHTHGRDELYK*	G3C:I10T:L14R:E16K:D18N:E33A:F45C:K78T:A86T:D101E:N134Y:N148K:I151V:K155Q:A156G:V162G:K165T:I166V:G174V:T183A:D209V:R210C:F222V:M232R	G6C:I13T:L17R:E19K:D21N:E36A:F48C:K81T:A89T:D105E:N138Y:N152K:I155V:K159Q:A160G:V166G:K169T:I170V:G178V:T187A:D216V:R217C:F230V:M240R	amac	24	13	4.0532756	4.5171695	ATGAGCAAGTGTGAGGAGCTGTTCACCGGGACAGTGCCCGTCCGCATTAAACTGAATGGCGACGTACACGGCCACAAGTTCAGCGTGCGCGGCGAGGGCGCTGGCGATGCCGACTACGGCAAGCTGGAGATCAAGTGTATCTGCACCACCGGCAAGCTGCCCGTGCCCTGGCCCACCCTCGTGACCACCCTGTCGTACGGCATTTTGTGCTTCGCGCGCTACCCCGAACACATGACTATGAACGACTTCTTCAAGTCCACCATGCCCGAAGGCTACATCCAGGAGCGCACCATCTTCTTCCAGGAGGACGGCAAGTACAAGACCCGTGGGGAGGTGAAGTTCGAGGGCGACACACTGGTGAACCGCATCGAGCTGAAGGGCATGGACTTCAAGGAGGAC…	1	amac24_1852	C6	4
MREGQELFTGIVPVLIELAGDVQGHKFCVRGEGEGDADYGKLEIKCTCTTGKLPVPWPTIVTTLSYGILCFARYPEHMKMNDFFKSAMPEGYIQERIIFFEDDGKYKTRGEVKFEGDALVNRVELKGMDFKEDGNILGHKLEYNFNSHNVYIMPDQANNGLKVNFKTRLNIEGGGVQHADHYQTNVPLGDAPVLIPINHYVSCQSAISKDSNETRDHMVILEVFSACGHTPGMDELYK*	S1R:K2E:E4Q:D18A:H22Q:S27C:F45C:I46T:L59I:T96I:Q100E:T117A:I122V:K155Q:I166T:H168L:L177H:G190A:L200V:T204S:R210S:F219I:F222V:H230P	S1R:K2E:E7Q:D21A:H25Q:S30C:F48C:I49T:L62I:T100I:Q104E:T121A:I126V:K159Q:I170T:H172L:L181H:G194A:L207V:T211S:R217S:F227I:F230V:H238P	amac	24	10	4.258228	4.606966	ATGCGCGAGGGCCAGGAGCTGTTCACCGGGATCGTGCCCGTCCTGATTGAGCTGGCCGGCGACGTACAAGGCCACAAGTTCTGCGTGCGCGGCGAGGGCGAGGGCGATGCCGACTACGGCAAGCTGGAGATCAAGTGTACATGCACCACCGGCAAGCTGCCCGTGCCCTGGCCCACCATTGTGACCACCCTGTCGTACGGCATTTTGTGCTTCGCGCGCTACCCCGAACACATGAAGATGAACGACTTCTTCAAGTCCGCCATGCCCGAAGGCTACATCCAGGAGCGCATAATCTTCTTCGAGGACGACGGCAAGTACAAGACCCGTGGGGAGGTGAAGTTCGAGGGCGACGCGCTGGTGAACCGCGTAGAGCTGAAGGGCATGGACTTCAAGGAGGAC…	1	amac24_1424	D6	5
MSKGKELFTGTVPVLIELAGDVHGHKFSVRGEGKGDADYGKLEIKVICTTGTLPVPWPTLVTTLSYGVLCFARYPEHMKKDDFFKSAMPEGYIQERTIFFQDDGKYKTRGEVKFEGDTLVNRIELKGMDFNEDGNILEHKLEYSFNSHNVYIMPDKTNNGLKGNFKTRLNIEGGGVQLADHYQMNVPLGNGPVLIPINHYVSCQTALTKDRNETRDHMVFLEFFSACGHTHGRYKLYK*	E4K:I10T:D18A:E33K:F45V:K51T:I67V:M79K:N80D:K130N:G137E:N143S:A156T:V162G:I166T:H168L:T183M:D189N:L200V:I206L:S207T:M232R:D233Y:E234K	E7K:I13T:D21A:E36K:F48V:K54T:I70V:M82K:N83D:K134N:G141E:N147S:A160T:V166G:I170T:H172L:T187M:D193N:L207V:I213L:S214T:M240R:D241Y:E242K	amac	24	10	4.310232	4.655586	ATGAGCAAGGGCAAGGAGCTGTTCACCGGGACCGTGCCCGTCCTGATTGAGCTGGCGGGCGACGTACACGGCCACAAGTTCAGCGTGCGCGGCGAGGGCAAGGGCGATGCCGACTACGGCAAGCTGGAGATCAAGGTTATCTGCACCACCGGCACCCTGCCCGTGCCCTGGCCCACCCTCGTGACCACCCTGTCGTACGGCGTTTTGTGCTTCGCGCGCTACCCCGAACACATGAAGAAGGACGACTTCTTCAAGTCCGCCATGCCCGAAGGCTACATCCAGGAGCGCACCATCTTCTTCCAGGACGACGGCAAGTACAAGACCCGTGGGGAGGTGAAGTTCGAGGGCGACACACTGGTGAACCGCATCGAGCTGAAGGGCATGGACTTCAACGAGGAC…	1	amac24_2318	E6	4
MSKGEELFTGIVPVLIELAGDVHGHKFSVRGEGKGDADYGKLEIKVICTTGTLPVPWPTLVTTLSYGVLCFARYPEHMKMDDFFKSAMPQGYIQERTISFQDDGKYRTRGEVKFEGDKLVNRIVLKGMGFKEDGKILGHKLEYNFNSHNVYIMPDKANNGLKGNFKTRLNIEGGGVQLADHDQTNVPLGGGPVLVPSNHYLSCQSALSKDRNEIRDHMVFLEFFSACGHTHGRDELYK*	D18A:E33K:F45V:K51T:I67V:N80D:E89Q:F98S:K106R:T117K:E123V:D128G:N134K:V162G:I166T:H168L:Y181D:D189G:I194V:I196S:T204S:I206L:T213I:M232R	D21A:E36K:F48V:K54T:I70V:N83D:E93Q:F102S:K110R:T121K:E127V:D132G:N138K:V166G:I170T:H172L:Y185D:D193G:I198V:I203S:T211S:I213L:T221I:M240R	amac	24	10	4.3831954	4.735963	ATGAGCAAGGGCGAGGAGCTGTTCACCGGGATCGTGCCCGTCCTGATTGAGCTGGCTGGCGACGTACACGGCCACAAGTTCAGCGTGCGCGGCGAGGGCAAAGGCGATGCCGACTACGGCAAGCTGGAGATCAAGGTCATCTGCACCACCGGCACTCTGCCCGTGCCCTGGCCCACCCTCGTGACCACCCTGTCGTACGGCGTCTTGTGCTTCGCGCGCTACCCCGAACACATGAAGATGGATGACTTCTTCAAGTCCGCCATGCCCCAAGGCTACATCCAGGAGCGCACCATCTCCTTCCAGGACGACGGCAAGTACCGTACCCGTGGGGAGGTGAAGTTCGAGGGCGACAAACTGGTGAACCGCATCGTCCTGAAGGGCATGGGGTTCAAGGAGGAC…	1	amac24_2303	F6	4
MSKGEELFNGIVPVLIELDGNIHGHKFSVRGEGEGNADYGKLEIKCICTTGMLPVPWPTLVTTMSYGILCFARYPEHMKMNDFFKSAMPEGYIQERTIFFQDDGKYKTRGEVKFVGDTLVNRVELKGMNFKEDGNILGHKLEYHFNSHTVYIMPDKTNNGLKGNFKVRLNIEGGGVQFADHYQTNVPLGDGPVLIPINHYLSCQSALSKDHNETRDHMVILEFFSACGRTPGMDELDK*	T8N:D20N:V21I:D35N:F45C:K51M:L63M:E114V:I122V:D128N:N143H:N148T:A156T:V162G:I166V:H168L:L177F:T204S:I206L:R210H:F219I:H228R:H230P:Y236D	T11N:D23N:V24I:D38N:F48C:K54M:L66M:E118V:I126V:D132N:N147H:N152T:A160T:V166G:I170V:H172L:L181F:T211S:I213L:R217H:F227I:H236R:H238P:Y244D	amac	24	8	4.6784143	4.6899786	ATGAGCAAGGGCGAGGAGCTGTTCAATGGGATCGTGCCCGTCCTGATTGAGCTGGACGGCAATATACACGGCCACAAGTTCAGCGTGCGCGGCGAGGGCGAGGGCAACGCCGACTACGGCAAGCTGGAGATCAAGTGCATCTGCACCACCGGCATGCTGCCCGTGCCCTGGCCCACCCTCGTGACCACCATGTCGTACGGCATTTTGTGCTTCGCGCGCTACCCCGAACACATGAAGATGAACGACTTCTTCAAGTCCGCCATGCCCGAAGGCTACATCCAGGAGCGCACCATCTTCTTCCAGGACGACGGCAAGTACAAGACCCGTGGGGAGGTGAAGTTCGTAGGCGACACACTGGTGAACCGCGTGGAGCTGAAGGGCATGAACTTCAAGGAGGAC…	1	amac24_344	G6	24
MSKGEELFTGIVPVLIKLDGDVHGHKFSVRGEGEGDAAHGKLEIKVICTTGKLPVPWPTLVTTMSYGILCFARYPEHLKMNDFFKSAMPEGYIQERTIFFENDGKYKTRGQVKFEGGTLVNRIELKGMNFKEDGNILGHKLEYNFNSHKVYIMPDKANNGLKGNFKTRHNIEGGGVQLADHYQSNVPLADGAVLIPINHYVSSQSAVSKDRNETRDHMVFLEVFSACGHAHGLDELYK*	E16K:D37A:Y38H:F45V:L63M:M77L:Q100E:D101N:E110Q:D116G:D128N:N148K:V162G:I166T:T183S:G188A:P191A:L200V:C202S:T204S:I206V:F222V:T229A:M232L	E19K:D40A:Y41H:F48V:L66M:M80L:Q104E:D105N:E114Q:D120G:D132N:N152K:V166G:I170T:T187S:G192A:P195A:L207V:C209S:T211S:I213V:F230V:T237A:M240L	amac	24	4	4.396391	4.765998	ATGAGCAAGGGCGAGGAGCTGTTCACCGGGATCGTGCCCGTCCTGATTAAACTGGACGGCGACGTACACGGCCACAAGTTCAGCGTGCGCGGCGAGGGCGAGGGCGATGCCGCTCACGGCAAGCTGGAGATCAAGGTGATCTGCACCACCGGCAAGCTGCCCGTGCCCTGGCCCACCCTCGTGACCACCATGTCGTACGGCATTTTGTGCTTCGCGCGCTACCCCGAACACTTGAAGATGAACGACTTCTTCAAGTCCGCCATGCCCGAAGGCTACATCCAGGAGCGCACCATCTTCTTCGAAAATGACGGCAAGTACAAGACCCGTGGGCAAGTGAAGTTCGAGGGCGGAACACTGGTGAACCGCATCGAGCTGAAGGGCATGAACTTCAAGGAGGAC…	1	amac24_1600	H6	4
MPAMKIECRITGTLNGVEFELVGGGEGTPEQGRMTNKMKSTKGALTFSPYLLSHVMGYGFYHFGTYPSGYENPFLHAINNGGYTNTRIEKYEDGGVLHVSFSYRYETGRVIGDFKVVGTSFPEDSVIFTDKIIRSNATVEHLHPMGDNVLEGSFARTFSLRDGGYYSFVVDSHMHFKSAIHPSILQNGGPMFAFRRVEEHHSNTELGIVEYQHAFKRPIAIA*	A106T:G119S:V150E:L199H:T216R:F220I	A119T:G132S:V165E:L214H:T236R:F240I	pplu	6	6	4.249297	4.2928314	ATGCCAGCCATGAAAATCGAATGTCGCATTACGGGCACTCTGAACGGCGTGGAGTTCGAGCTCGTAGGCGGGGGCGAGGGCACCCCGGAACAGGGCCGCATGACCAACAAGATGAAGTCCACCAAAGGCGCACTGACCTTTTCTCCGTACCTGCTCAGCCACGTTATGGGTTACGGCTTCTATCACTTCGGCACGTACCCCTCCGGTTACGAGAATCCGTTCCTCCACGCTATCAACAACGGTGGCTACACAAATACGCGCATTGAAAAGTACGAGGACGGCGGCGTCCTTCACGTATCATTCTCATATCGTTATGAGACTGGTCGCGTGATCGGCGACTTCAAGGTAGTGGGCACATCTTTCCCTGAGGACTCAGTCATCTTTACGGACAAGATCATT…	1	pplu6_2778	A7	223
MPAMKIECRITGTLNGVEFELVGGGEGTPVQGRMNNKMKSTKGALTFSPYLLSHVMGYGFYHFGTYPSGYENPFLHAINNGGYTNTRIEKYEDGGVLHVSFSYRYEAGRVIGDFKVVGTGFPEDSVIFTDKIIRSNATVEHLHPMGDNVLVGSFARTFSLRDGGYYSFVVDSHMHFKSAIHPSILQNGGPMFAFRSVEEHHSNTELGIVEYQDAFKTPIALA*	E29V:T34N:R195S:L199H:H212D:F220L	E40V:T45N:R210S:L214H:H232D:F240L	pplu	6	6	4.4679008	4.3115892	ATGCCAGCCATGAAAATCGAATGTCGCATTACGGGCACTCTGAACGGCGTGGAGTTCGAGCTCGTAGGCGGGGGCGAGGGCACCCCGGTACAGGGCCGCATGAATAACAAGATGAAGTCCACCAAAGGCGCACTGACCTTTTCTCCGTACCTGCTCAGCCACGTTATGGGTTACGGCTTCTATCACTTCGGCACGTACCCCTCCGGTTACGAGAATCCGTTCCTCCACGCTATCAACAACGGTGGCTACACAAATACGCGCATTGAAAAGTACGAGGACGGCGGCGTCCTTCACGTATCATTCTCATATCGTTATGAGGCGGGTCGCGTGATCGGCGACTTCAAGGTAGTGGGCACAGGCTTCCCTGAGGACTCAGTCATCTTTACGGACAAGATCATT…	1	pplu6_2875	B7	125
MPAMKIECRITGTLNGVEFELVGGGAGTQEQGRMTNKMKATKGALTFSPYLLSHVMGYGFYHFGTYPSGYENPFLHAINNGGYTNTRIEKYEDGGVLHVSFSYRYEAGRVIGDFKVVGTGFPEDSVIFTDKIIRSNATVEHLHPMGDNVLVGSFARTFSLRDGGYYSFVVDSHMHFKSAIHPSILQNDGPMFAFRRVEEIHSNTELGIVEYQHAFETPIAFA*	E25A:P28Q:S39A:G187D:L199I:K215E	E36A:P39Q:S50A:G202D:L214I:K235E	pplu	6	6	4.333299	4.2721233	ATGCCAGCCATGAAAATCGAATGTCGCATTACGGGCACTCTGAACGGCGTGGAGTTCGAGCTCGTAGGCGGGGGCGCAGGCACCCAGGAACAGGGCCGCATGACCAACAAGATGAAGGCAACCAAAGGCGCACTGACCTTTTCTCCGTACCTGCTCAGCCACGTTATGGGTTACGGCTTCTATCACTTCGGCACGTACCCCTCCGGTTACGAGAATCCGTTCCTCCACGCTATCAACAACGGTGGCTACACAAATACGCGCATTGAAAAGTACGAGGACGGCGGCGTCCTTCACGTATCATTCTCATATCGTTATGAGGCGGGTCGCGTGATCGGCGACTTCAAGGTAGTGGGCACAGGCTTCCCTGAGGACTCAGTCATCTTTACGGACAAGATCATT…	1	pplu6_2985	C7	176
MPAMKIECRITGTLNGVEFELVGGGGGTPEQGRMTNKMKSTKGALTFSPYLLSHVMGYGFYHFGTYPSGYENPFLHAVNNGGYTNTRIEKYEDGGVLHVSFSYRYEARRVIGDFKVVGTGFPEDSVIFTDKIIRSNATVEHLHPMGDNVLVGSFARTFSLRDGGYYSFVVDSHMHFKSAIHPSILQTGGPMFAFRRVEEHHSNTELGIVEYQHAFQTPIAFA*	E25G:I77V:G107R:N186T:L199H:K215Q	E36G:I90V:G120R:N201T:L214H:K235Q	pplu	6	6	4.338868	4.318245	ATGCCAGCCATGAAAATCGAATGTCGCATTACGGGCACTCTGAACGGCGTGGAGTTCGAGCTCGTAGGCGGGGGCGGTGGCACCCCGGAACAGGGCCGCATGACCAACAAGATGAAGTCCACCAAAGGCGCACTGACCTTTTCTCCGTACCTGCTCAGCCACGTTATGGGTTACGGCTTCTATCACTTCGGCACGTACCCCTCCGGTTACGAGAATCCGTTCCTCCACGCTGTCAACAACGGTGGCTACACAAATACGCGCATTGAAAAGTACGAGGACGGCGGCGTCCTTCACGTATCATTCTCATATCGTTATGAGGCGCGTCGCGTGATCGGCGACTTCAAGGTAGTGGGCACAGGCTTCCCTGAGGACTCAGTCATCTTTACGGACAAGATCATT…	1	pplu6_2650	D7	221
MPAMKIECRITGTLNGVEFELVGGGEGTPEQGRMTNKMKSTKGALTFSPYLLSHVMGYGFYHFGTYPSGYENPFLHAINNGGYTNTRIEKYEDGGVLHVSFSYRYGAGRVIGDFKVVGTGFPEDSVIFTDKIIRSNATVEHLHPMGDNVLVGSFARTFSLRDGGYYSSVVVSHMHFKSAIHRSILQNGGPMFAFRRVEEFHSNTELGIVEYQHAFETPIAFA*	E105G:F167S:D170V:P181R:L199F:K215E	E118G:F182S:D185V:P196R:L214F:K235E	pplu	6	5	4.391806	4.2861414	ATGCCAGCCATGAAAATCGAATGTCGCATTACGGGCACTCTGAACGGCGTGGAGTTCGAGCTCGTAGGCGGGGGCGAGGGCACCCCGGAACAGGGCCGCATGACCAACAAGATGAAGTCCACCAAAGGCGCACTGACCTTTTCTCCGTACCTGCTCAGCCACGTTATGGGTTACGGCTTCTATCACTTCGGCACGTACCCCTCCGGTTACGAGAATCCGTTCCTCCACGCTATCAACAACGGTGGCTACACAAATACGCGCATTGAAAAGTACGAGGACGGCGGCGTCCTTCACGTATCATTCTCATATCGTTATGGGGCGGGTCGCGTGATCGGCGACTTCAAGGTAGTGGGCACAGGCTTCCCTGAGGACTCAGTCATCTTTACGGACAAGATCATT…	1	pplu6_3162	E7	234
MPAMKIECRITGTLNGVEFEIVGGGEGTPEQGHMTNKMKSTKGALTFSPYLLSHVMGYGFYHFGTYPSGYENPFFHAINNGGHTNTRIEKYEDGGVLHVSFSYRYEAGRVIGDFKVVGTGFPEDSVIFTDKIIRSNATVEHLHPMGDNVLVGSFARTFSLRDGGYYSFVVDSHMHFKSAIHPSILQNGGPMFAFRRVEERHSNTELGIVEYQDAFKTPIAFA*	L20I:R32H:L74F:Y82H:L199R:H212D	L31I:R43H:L87F:Y95H:L214R:H232D	pplu	6	4	4.338354	4.2641516	ATGCCAGCCATGAAAATCGAATGTCGCATTACGGGCACTCTGAACGGCGTGGAGTTCGAGATCGTAGGCGGGGGCGAGGGCACCCCGGAACAGGGCCATATGACCAACAAGATGAAGTCCACCAAAGGCGCACTGACCTTTTCTCCGTACCTGCTCAGCCACGTTATGGGTTACGGCTTCTATCACTTCGGCACGTACCCCTCCGGTTACGAGAATCCGTTCTTTCACGCTATCAACAACGGTGGCCATACAAATACGCGCATTGAAAAGTACGAGGACGGCGGCGTCCTTCACGTATCATTCTCATATCGTTATGAGGCGGGTCGCGTGATCGGCGACTTCAAGGTAGTGGGCACAGGCTTCCCTGAGGACTCAGTCATCTTTACGGACAAGATCATT…	1	pplu6_89	F7	26
MPAMKIECRITGTLNGVEFELVGGGEGTPEQGRMTNKMKSTKGALTFSPYLLSHVMGYGFYHFGTYPSGYENPFLHAINNGGYTNTRIEKYEDGGVLHVSFSYRYEPGRVIGDFKVVGTGFPEDSVIFTDKIIGSNATVEHLHPMGDNVLVGSFARTFSLRDGGYYSFVVDSHMHFKSAIHPSILQNGGPMFAFRLVEERHSNTKLGIVEYQHAFTTPIAFA*	A106P:R133G:R195L:L199R:E204K:K215T	A119P:R147G:R210L:L214R:E224K:K235T	pplu	6	4	4.45479	4.3284826	ATGCCAGCCATGAAAATCGAATGTCGCATTACGGGCACTCTGAACGGCGTGGAGTTCGAGCTCGTAGGCGGGGGCGAGGGCACCCCGGAACAGGGCCGCATGACCAACAAGATGAAGTCCACCAAAGGCGCACTGACCTTTTCTCCGTACCTGCTCAGCCACGTTATGGGTTACGGCTTCTATCACTTCGGCACGTACCCCTCCGGTTACGAGAATCCGTTCCTCCACGCTATCAACAACGGTGGCTACACAAATACGCGCATTGAAAAGTACGAGGACGGCGGCGTCCTTCACGTATCATTCTCATATCGTTATGAGCCAGGTCGCGTGATCGGCGACTTCAAGGTAGTGGGCACAGGCTTCCCTGAGGACTCAGTCATCTTTACGGACAAGATCATT…	1	pplu6_2071	G7	239
MPDMKIECRITGTLNGVEFALVGGGAGTPEQGCMTNKMKSTKGALTFSPYLLSHVMGYGFYHFGTYPSGYENPFLHAINNGGYTNTRIEKYEDGGVLHVSFSYRYEAGRVIGDFKVVGTGFPEDSVIFTDKIIRSNATVEHLHPMGDNVLVGSFARTFSLRDGGYYSFVVDSHMHFKSAIHPSILQNGGPMFAFRRVEEHHSNTELGIVEYQHAFKTPIAFT*	A2D:E19A:E25A:R32C:L199H:A221T	A2D:E30A:E36A:R43C:L214H:A241T	pplu	6	4	4.388768	4.37611	ATGCCAGATATGAAAATCGAATGTCGCATTACGGGCACTCTGAACGGCGTGGAGTTCGCTCTCGTAGGCGGGGGCGCTGGCACCCCGGAACAGGGCTGTATGACCAACAAGATGAAGTCCACCAAAGGCGCACTGACCTTTTCTCCGTACCTGCTCAGCCACGTTATGGGTTACGGCTTCTATCACTTCGGCACGTACCCCTCCGGTTACGAGAATCCGTTCCTCCACGCTATCAACAACGGTGGCTACACAAATACGCGCATTGAAAAGTACGAGGACGGCGGCGTCCTTCACGTATCATTCTCATATCGTTATGAGGCGGGTCGCGTGATCGGCGACTTCAAGGTAGTGGGCACAGGCTTCCCTGAGGACTCAGTCATCTTTACGGACAAGATCATT…	1	pplu6_3035	H7	227
MPAMKIECRITGTLNGVEFELVGGGEGTPEQGRMTNKMKSTKGALTFSPYLLSHVMGYGFYHFGTYPSGYENPFLHAINNGGYTNTRIEKYEDGGVLHVSFSYRYEPGRVIGDFKVVGTGFPEDSVIFTDKIIRSNATVEHLHPMADNVLVGSFARTFSLRGGRYYSFVVDSHMHFKSAIHPSILQNGGPMFAFRRVEEHHSNTELGIVEFQHAFKTPIAFA*	A106P:G145A:D161G:G163R:L199H:Y210F	A119P:G160A:D176G:G178R:L214H:Y230F	pplu	6	3	4.363085	4.371915	ATGCCAGCCATGAAAATCGAATGTCGCATTACGGGCACTCTGAACGGCGTGGAGTTCGAGCTCGTAGGCGGGGGCGAGGGCACCCCGGAACAGGGCCGCATGACCAACAAGATGAAGTCCACCAAAGGCGCACTGACCTTTTCTCCGTACCTGCTCAGCCACGTTATGGGTTACGGCTTCTATCACTTCGGCACGTACCCCTCCGGTTACGAGAATCCGTTCCTCCACGCTATCAACAACGGTGGCTACACAAATACGCGCATTGAAAAGTACGAGGACGGCGGCGTCCTTCACGTATCATTCTCATATCGTTATGAGCCTGGTCGCGTGATCGGCGACTTCAAGGTAGTGGGCACAGGCTTCCCTGAGGACTCAGTCATCTTTACGGACAAGATCATT…	1	pplu6_1635	A8	225
MLAMKIECRITGTLNGVEFELVGGGEGIPEQGCMTNKMKSTKGALTFSPYLLSHVMGYGFYHFGTYPSGYENPFLHAINNGGYTNTRIEKYEDGGVLHVSFSYRYEAGRVIGDFKLVGTGFPEDSVIFTDKIIRSNATVEHLHPMGDNVLVGSFARTFSLRDGGYYSFVVDSHMHFKSAIHPSILQNGGPMFAFRRVEERHSNTELGIVEYQHAFKRPIAFA*	P1L:T27I:R32C:V115L:L199R:T216R	P1L:T38I:R43C:V128L:L214R:T236R	pplu	6	3	4.354388	4.373624	ATGTTGGCCATGAAAATCGAATGTCGCATTACGGGCACTCTGAACGGCGTGGAGTTCGAGCTCGTAGGCGGGGGCGAGGGCATCCCGGAACAGGGCTGTATGACCAACAAGATGAAGTCCACCAAAGGCGCACTGACCTTTTCTCCGTACCTGCTCAGCCACGTTATGGGTTACGGCTTCTATCACTTCGGCACGTACCCCTCCGGTTACGAGAATCCGTTCCTCCACGCTATCAACAACGGTGGCTACACAAATACGCGCATTGAAAAGTACGAGGACGGCGGCGTCCTTCACGTATCATTCTCATATCGTTATGAGGCGGGTCGCGTGATCGGCGACTTCAAGCTGGTGGGCACAGGCTTCCCTGAGGACTCAGTCATCTTTACGGACAAGATCATT…	1	pplu6_2316	B8	130
MPAMKIECRITGTLNGVEFELVGGGEGTPEQGRMTNKMKSTKGALTFSPYLLSHVMGYGFYHFGTYPSGYENPFLHSINNGGYTNTRIEKYEDGGVLHVSFSYRYEAGRVIGDFKVVGTGFPEDSVIFTDKIIRSNATVEHLHPMGDKVLVGSFARTFSLRDGGYYSFVVDSHMHFKSAIHPSILQNDGPMFAFRRVEEFHTNTELGIVEYQHAFKTPIDFA*	A76S:N147K:G187D:L199F:S201T:A219D	A89S:N162K:G202D:L214F:S221T:A239D	pplu	6	3	4.441696	4.374709	ATGCCAGCCATGAAAATCGAATGTCGCATTACGGGCACTCTGAACGGCGTGGAGTTCGAGCTCGTAGGCGGGGGCGAGGGCACCCCGGAACAGGGCCGCATGACCAACAAGATGAAGTCCACCAAAGGCGCACTGACCTTTTCTCCGTACCTGCTCAGCCACGTTATGGGTTACGGCTTCTATCACTTCGGCACGTACCCCTCCGGTTACGAGAATCCGTTCCTCCACTCAATCAACAACGGTGGCTACACAAATACGCGCATTGAAAAGTACGAGGACGGCGGCGTCCTTCACGTATCATTCTCATATCGTTATGAGGCGGGTCGCGTGATCGGCGACTTCAAGGTAGTGGGCACAGGCTTCCCTGAGGACTCAGTCATCTTTACGGACAAGATCATT…	1	pplu6_1427	C8	235
MPAMKIECRITGTLNGVEFELVGGGKGTPEQGRMTNKMKSTKGALTFSPYLLSHVMGYGFYHFGTYPSGYENPFLHAINNGGYTNTRIEKYEDGGVLHVSFSYRYEAGRVIGDFKVVGTGFPEDSVIFSDKIIRSNATVEHLHPMGDNVLVGSFARTFSLRDGGYYSFVVASHMHFKSAIHPSILQNGGPMFAFRRVEEIHSNTKLEIVEYQHAFKTPIAFA*	E25K:T128S:D170A:L199I:E204K:G206E	E36K:T141S:D185A:L214I:E224K:G226E	pplu	6	3	4.3937087	4.3644323	ATGCCAGCCATGAAAATCGAATGTCGCATTACGGGCACTCTGAACGGCGTGGAGTTCGAGCTCGTAGGCGGGGGCAAGGGCACCCCGGAACAGGGCCGCATGACCAACAAGATGAAGTCCACCAAAGGCGCACTGACCTTTTCTCCGTACCTGCTCAGCCACGTTATGGGTTACGGCTTCTATCACTTCGGCACGTACCCCTCCGGTTACGAGAATCCGTTCCTCCACGCTATCAACAACGGTGGCTACACAAATACGCGCATTGAAAAGTACGAGGACGGCGGCGTCCTTCACGTATCATTCTCATATCGTTATGAGGCGGGTCGCGTGATCGGCGACTTCAAGGTAGTGGGCACAGGCTTCCCTGAGGACTCAGTCATCTTTTCGGACAAGATCATT…	1	pplu6_1538	D8	235
MPSMKIECRITGTLNGVEFELVGGGEGTPELGCMTNKMKSAKGALTFSPYLLSHVMGYGFYHFGTYPSGYENPFLHATNNGGYTNMRIEKYEDGGVLHVSFSYRYETRRVIGDFKVVGTGFPEDSVIFTDKIIRSNATVEHLHPMGDNVLVGSFARTFSLRDGGYYSFVVDSHMHFKSAIHPSILQNCGPMFAFRRVEEHHSNTELGIVEYQHAFKRPIAFE*	A2S:Q30L:R32C:T40A:I77T:T85M:A106T:G107R:G187C:L199H:T216R:A221E	A2S:Q41L:R43C:T51A:I90T:T98M:A119T:G120R:G202C:L214H:T236R:A241E	pplu	12	12	4.2867274	4.423587	ATGCCATCGATGAAAATCGAATGTCGCATTACGGGCACTCTGAACGGCGTGGAGTTCGAGCTCGTAGGCGGGGGCGAGGGCACCCCGGAATTGGGCTGCATGACCAACAAGATGAAGTCCGCGAAAGGCGCACTGACCTTTTCTCCGTACCTGCTCAGCCACGTTATGGGTTACGGCTTCTATCACTTCGGCACGTACCCCTCCGGTTACGAGAATCCGTTCCTCCACGCTACAAACAACGGTGGCTACACAAATATGCGCATTGAAAAGTACGAGGACGGCGGCGTCCTTCACGTATCATTCTCATATCGTTATGAGACTCGCCGCGTGATCGGCGACTTCAAGGTAGTGGGCACAGGCTTCCCTGAGGACTCAGTCATCTTTACGGACAAGATCATT…	1	pplu12_2746	E8	11
MPAMKIECRITGTLNGVEFELVGGGAGTPEQGCMTNKMKSTKGALTFSPYLLSHVMGYGFYHFGTYPSGYENPFLHAINNGGYTNTRIEKYEDGGVLRVSFLYRYEAGRVIGDFKVVGTGFPEDSVIFTDKIICSNATVEHLHPMGDNVLVGSFARTFSLRDGGYYSYVVDSHMHFQSAIHPSILQNGGPMFAFRSVEERHSNTELGIVEYQDAFKRPIALA*	E25A:R32C:H97R:S101L:R133C:F167Y:K176Q:R195S:L199R:H212D:T216R:F220L	E36A:R43C:H110R:S114L:R147C:F182Y:K191Q:R210S:L214R:H232D:T236R:F240L	pplu	12	12	4.429513	4.314827	ATGCCAGCCATGAAAATCGAATGTCGCATTACGGGCACTCTGAACGGCGTGGAGTTCGAGCTCGTAGGCGGGGGCGCAGGCACCCCGGAACAGGGCTGCATGACCAACAAGATGAAGTCCACCAAAGGCGCACTGACCTTTTCTCCGTACCTGCTCAGCCACGTTATGGGTTACGGCTTCTATCACTTCGGCACGTACCCCTCCGGTTACGAGAATCCGTTCCTCCACGCTATCAACAACGGTGGCTACACAAATACGCGCATTGAAAAGTACGAGGACGGCGGCGTCCTTCGCGTATCATTCCTTTATCGTTATGAGGCGGGTCGCGTGATCGGCGACTTCAAGGTAGTGGGCACAGGCTTCCCTGAGGACTCAGTCATCTTTACGGACAAGATCATT…	1	pplu12_2687	F8	6
MPAMEIECRITGTLNGVEFELVGGGEGSPEQGRMTNKMKSTKGALTFSPYLLSHVMGYGFYHFGTYPSGYENPFLHAIINGGYTNTRIEKYEDGGVLQVSFSYRYEARRVIGDFKVVGTSFPEDSVIFTDKIIRSNATVEHLHPMGDNVLVGSFARTFSLRDGGYYSYVVDSRMHFKSAIHPSILQNGGPMFAFRRVEEHHSNTKLGIVEYQHAFQTPIAFE*	K4E:T27S:N78I:H97Q:G107R:G119S:F167Y:H172R:L199H:E204K:K215Q:A221E	K15E:T38S:N91I:H110Q:G120R:G132S:F182Y:H187R:L214H:E224K:K235Q:A241E	pplu	12	12	4.449329	4.3781385	ATGCCAGCCATGGAGATCGAATGTCGCATTACGGGCACTCTGAACGGCGTGGAGTTCGAGCTCGTAGGCGGGGGCGAGGGCTCGCCGGAACAGGGCCGCATGACCAACAAGATGAAGTCCACCAAAGGCGCACTGACCTTTTCTCCGTACCTGCTCAGCCACGTTATGGGTTACGGCTTCTATCACTTCGGCACGTACCCCTCCGGTTACGAGAATCCGTTCCTCCACGCTATCATCAACGGTGGCTACACAAATACGCGCATTGAAAAGTACGAGGACGGCGGCGTCCTTCAAGTATCATTCTCATATCGTTATGAGGCGCGCCGCGTGATCGGCGACTTCAAGGTAGTGGGCACAAGCTTCCCTGAGGACTCAGTCATCTTTACGGACAAGATCATT…	1	pplu12_3162	G8	67
MPAMKIECRITGTLNGVEFELVGGGAGTPEQGRMTNKMKSTKGALTFSPYLLSHVMGYGFYHFGMYTSGYENPFFHAVNNGGYTNTRIEKYEDGGVLHVSFSYRYEAGRVIGDFKVVGTGFPKDSVIFTDKIIRSNATVEHLHPMGDNVLEGSFARTFSLRDGGYYSFVVDSHMHFKSAIHPSILQNGGPMFAFRRVDEVHSNTELGIVEYQHAFETPIAIT*	E25A:T64M:P66T:L74F:I77V:E122K:V150E:E197D:L199V:K215E:F220I:A221T	E36A:T75M:P77T:L87F:I90V:E135K:V165E:E212D:L214V:K235E:F240I:A241T	pplu	12	9	4.2832417	4.2909966	ATGCCAGCCATGAAAATCGAATGTCGCATTACGGGCACTCTGAACGGCGTGGAGTTCGAGCTCGTAGGCGGGGGCGCCGGCACCCCGGAACAGGGCCGCATGACCAACAAGATGAAGTCCACCAAAGGCGCACTGACCTTTTCTCCGTACCTGCTCAGCCACGTTATGGGTTACGGCTTCTATCACTTCGGCATGTACACCTCCGGTTACGAGAATCCGTTCTTTCACGCTGTTAACAACGGTGGCTACACAAATACGCGCATTGAAAAGTACGAGGACGGCGGCGTCCTTCACGTATCATTCTCATATCGTTATGAGGCGGGTCGCGTGATCGGCGACTTCAAGGTAGTGGGCACAGGCTTCCCTAAAGACTCAGTCATCTTTACGGACAAGATCATT…	1	pplu12_3061	H8	3
MPDMKIECRITGTLNGVEFELVGGGEGIPEQGCMTNNMKSTKGALTFSPYLLSHVMGYGFYHFGTYPSGYENPFLHAINNGGYTNTRIEKYEDGGVLHVSFSYRYEAGRVIGDFKVVGTGFPADSVIFTDKIIRSNATVEHLHPMGDNVLVGSFARTFSLRDGGYYSSVVDSRMHFKSAIHPSILQNDGPMFAFRRVEELHSKTELGIAECQDAFKTPIAFA*	A2D:T27I:R32C:K36N:E122A:F167S:H172R:G187D:N202K:V208A:Y210C:H212D	A2D:T38I:R43C:K47N:E135A:F182S:H187R:G202D:N222K:V228A:Y230C:H232D	pplu	12	6	4.523139	4.568613	ATGCCAGATATGAAAATCGAATGTCGCATTACGGGCACTCTGAACGGCGTGGAGTTCGAGCTCGTAGGCGGGGGCGAGGGCATCCCGGAACAGGGCTGCATGACCAACAATATGAAGTCCACCAAAGGCGCACTGACCTTTTCTCCGTACCTGCTCAGCCACGTTATGGGTTACGGCTTCTATCACTTCGGCACGTACCCCTCCGGTTACGAGAATCCGTTCCTCCACGCTATCAACAACGGTGGCTACACAAATACGCGCATTGAAAAGTACGAGGACGGCGGCGTCCTTCACGTATCATTCTCATATCGTTATGAGGCGGGTCGCGTGATCGGCGACTTCAAGGTAGTGGGCACAGGCTTCCCTGCTGACTCAGTCATCTTTACGGACAAGATCATT…	1	pplu12_501	A9	225
MPAMKIECRITGTLNGVEFELVGGGEGIPEQGCMTNKMKSTKGALTFSPYLLSHVMGYGFYHFGTYPSGYENPFLHSINNGGYTNTRIEKYEDGGVLYVSFSYRYEAGRVIGDFKVAGTGFPEDSVIFTDKIIRSNATVEHLHPMADNLLVGSFARTFSLRDGGYYSFAVDSHMHFKSAIHPSILQNGGPMFAFRRVEEVHSNTELEIVEYQHAFQTPIALA*	T27I:R32C:A76S:H97Y:V116A:G145A:V148L:V168A:L199V:G206E:K215Q:F220L	T38I:R43C:A89S:H110Y:V129A:G160A:V163L:V183A:L214V:G226E:K235Q:F240L	pplu	12	4	4.3833604	4.5029054	ATGCCAGCCATGAAAATCGAATGTCGCATTACGGGCACTCTGAACGGCGTGGAGTTCGAGCTCGTAGGCGGGGGCGAGGGCATACCGGAACAGGGCTGCATGACCAACAAGATGAAGTCCACCAAAGGCGCACTGACCTTTTCTCCGTACCTGCTCAGCCACGTTATGGGTTACGGCTTCTATCACTTCGGCACGTACCCCTCCGGTTACGAGAATCCGTTCCTCCACAGCATCAACAACGGTGGCTACACAAATACGCGCATTGAAAAGTACGAGGACGGCGGCGTCCTTTACGTATCATTCTCATATCGTTATGAGGCGGGTCGCGTGATCGGCGACTTCAAGGTAGCGGGCACAGGCTTCCCTGAGGACTCAGTCATCTTTACGGACAAGATCATT…	1	pplu12_1601	B9	74
MPAMKIECRITGTLNGVEFELVGGGKGNPEQGRMTNNMKSTKGALTFSPYLLSHVMGYGFYHFGMYPSGYENPFLHAINNGGYTNTRIEKYEDGGVLHVSFSYRYESGRVIGDFKVVGTGFPEDSVIFTDKIIGSNATVEHLHPMGDNVLVGSFARTFSLRDGGYYSFLVDSRMHFKSEIHPSILQNGGPMFAFRRVEEHHSNTEMGIVEFQHAFKTPIAFA*	E25K:T27N:K36N:T64M:A106S:R133G:V168L:H172R:A178E:L199H:L205M:Y210F	E36K:T38N:K47N:T75M:A119S:R147G:V183L:H187R:A193E:L214H:L225M:Y230F	pplu	12	4	4.5292935	4.5424294	ATGCCAGCCATGAAAATCGAATGTCGCATTACGGGCACTCTGAACGGCGTGGAGTTCGAGCTCGTAGGCGGGGGCAAAGGCAACCCGGAACAGGGCCGCATGACCAACAACATGAAGTCCACCAAAGGCGCACTGACCTTTTCTCCGTACCTGCTCAGCCACGTTATGGGTTACGGCTTCTATCACTTCGGCATGTACCCCTCCGGTTACGAGAATCCGTTCCTCCACGCTATCAACAACGGTGGCTACACAAATACGCGCATTGAAAAGTACGAGGACGGCGGCGTCCTTCACGTATCATTCTCATATCGTTATGAGTCAGGTCGCGTGATCGGCGACTTCAAGGTAGTGGGCACAGGCTTCCCTGAGGACTCAGTCATCTTTACGGACAAGATCATT…	1	pplu12_1204	C9	224
MPDMKIECRITGTLNGVEFELVGGGEGNPEQGRMTNKMKSTKGALTFSPYLLSHVMGYGFYHFGTYPSGYENPFLHAINNGGYTNTRIEKYEDGGVLHVSFSYRYKAGRVIGDFKVVGTDFPEDSVIFTDKIIRSNATVEHLHPMGDNVLVGSFARTFSLRDGGYYSSVADSHMHFKSAIHPSILQNGGPMFAFRRVDEVHSNTELGIVEYQHAFKRPIVLE*	A2D:T27N:E105K:G119D:F167S:V169A:E197D:L199V:T216R:A219V:F220L:A221E	A2D:T38N:E118K:G132D:F182S:V184A:E212D:L214V:T236R:A239V:F240L:A241E	pplu	12	4	4.473547	4.4458323	ATGCCAGACATGAAAATCGAATGTCGCATTACGGGCACTCTGAACGGCGTGGAGTTCGAGCTCGTAGGCGGGGGCGAGGGCAATCCGGAACAGGGCCGCATGACCAACAAGATGAAGTCCACCAAAGGCGCACTGACCTTTTCTCCGTACCTGCTCAGCCACGTTATGGGTTACGGCTTCTATCACTTCGGCACGTACCCCTCCGGTTACGAGAATCCGTTCCTCCACGCTATCAACAACGGTGGCTACACAAATACGCGCATTGAAAAGTACGAGGACGGCGGCGTCCTTCACGTATCATTCTCATATCGTTATAAAGCGGGTCGCGTGATCGGCGACTTCAAGGTAGTGGGCACAGATTTCCCTGAGGACTCAGTCATCTTTACGGACAAGATCATT…	1	pplu12_1147	D9	180
MPAMKIECRITGTLNGVEFALVGGGEGTPEQGRMANEMKSTKGALTFSPYLLSHVMGYGFYHFGTYPSGYENPFLHAINNGGYTNTRIEKYEDGGVLHVSFSYRYEAGRVIGDFKVVGTGFPEDSVIFTDKIIRSNATVEHLHPRGDNLLVGSFARTFSLRDGGYYSSVVDSHMHFKSEIHPSILQNGGPMFAFRRVEELHNNTVLGIVEYQHAFKSPNAFE*	E19A:T34A:K36E:M144R:V148L:F167S:A178E:S201N:E204V:T216S:I218N:A221E	E30A:T45A:K47E:M158R:V163L:F182S:A193E:S221N:E224V:T236S:I238N:A241E	pplu	12	3	4.2364087	4.3550787	ATGCCAGCCATGAAAATCGAATGTCGCATTACGGGCACTCTGAACGGCGTGGAGTTCGCGCTCGTAGGCGGGGGCGAGGGCACCCCGGAACAGGGCCGCATGGCCAACGAGATGAAGTCCACCAAAGGCGCACTGACCTTTTCTCCGTACCTGCTCAGCCACGTTATGGGTTACGGCTTCTATCACTTCGGCACGTACCCCTCCGGTTACGAGAATCCGTTCCTCCACGCTATCAACAACGGTGGCTACACAAATACGCGCATTGAAAAGTACGAGGACGGCGGCGTCCTTCACGTATCATTCTCATATCGTTATGAGGCGGGTCGCGTGATCGGCGACTTCAAGGTAGTGGGCACAGGCTTCCCTGAGGACTCAGTCATCTTTACGGACAAGATCATT…	1	pplu12_1051	E9	230
MPAMKIECRITGTLNGVEFELVGGGEGSPEQGRMNNKMKSTKGALTFSPYLLSHVMGYGFYHFGTYPSDYENPFLHAINNGGYTNTRIEKYEDGGVLHVSFSYRYEAGRVIGDFKVVGTGFPEDSVIFTDKIIRSNASVEHLHPMGDNLLVGSFARTFSLRDGGYYSFVVESHMHFKSAIHPSILQNGGPMFAFRRVVELHSNTELVILEFQHAFKTPIDLA*	T27S:T34N:G68D:T137S:V148L:D170E:E197V:G206V:V208L:Y210F:A219D:F220L	T38S:T45N:G79D:T151S:V163L:D185E:E212V:G226V:V228L:Y230F:A239D:F240L	pplu	12	3	4.4000874	4.580935	ATGCCAGCCATGAAAATCGAATGTCGCATTACGGGCACTCTGAACGGCGTGGAGTTCGAGCTCGTAGGCGGGGGCGAGGGCAGTCCGGAACAGGGCCGCATGAACAACAAGATGAAGTCCACCAAAGGCGCACTGACCTTTTCTCCGTACCTGCTCAGCCACGTTATGGGTTACGGCTTCTATCACTTCGGCACGTACCCCTCCGATTACGAGAATCCGTTCCTCCACGCTATCAACAACGGTGGCTACACAAATACGCGCATTGAAAAGTACGAGGACGGCGGCGTCCTTCACGTATCATTCTCATATCGTTATGAGGCGGGTCGCGTGATCGGCGACTTCAAGGTAGTGGGCACAGGCTTCCCTGAGGACTCAGTCATCTTTACGGACAAGATCATT…	1	pplu12_2000	F9	209
MPDMKIECRITGTLNGVEFELVGGGKGTPEQGRMNNKMKSTKGALTFSPYLLSHVMGYGFYHFGTYPSGYVNPFLHAINNGGYTNTRIEKYEDGGVLHVSFSYRYEAGRVIGDFKVMGTGFPEDSVIFTDKIIRSNATVEHLHPMGDKVLVGSFARTFSLRDGGYYSFVVDSHMHFKSAIHPSILQNGGPMFAFRCVVEIHSKTELGIVEYQHAFKAPIAFS*	A2D:E25K:T34N:E70V:V116M:N147K:R195C:E197V:L199I:N202K:T216A:A221S	A2D:E36K:T45N:E81V:V129M:N162K:R210C:E212V:L214I:N222K:T236A:A241S	pplu	12	3	4.250431	4.4074583	ATGCCAGATATGAAAATCGAATGTCGCATTACGGGCACTCTGAACGGCGTGGAGTTCGAGCTCGTAGGCGGGGGCAAAGGCACCCCGGAACAGGGCCGCATGAACAACAAGATGAAGTCCACCAAAGGCGCACTGACCTTTTCTCCGTACCTGCTCAGCCACGTTATGGGTTACGGCTTCTATCACTTCGGCACGTACCCCTCCGGTTACGTGAATCCGTTCCTCCACGCTATCAACAACGGTGGCTACACAAATACGCGCATTGAAAAGTACGAGGACGGCGGCGTCCTTCACGTATCATTCTCATATCGTTATGAGGCGGGTCGCGTGATCGGCGACTTCAAGGTAATGGGCACAGGCTTCCCTGAGGACTCAGTCATCTTTACGGACAAGATCATT…	1	pplu12_1356	G9	218
MPAMKIECRITGNLNGVEFELVGGGEGTPEQGCMTNNMKSTKGALTFSPYMLSHVMGYGFYHFGTYPSGYENPFLHAISNGGYTNTRIERYEDGGVLHVSFSYRYEAGRVIGDFKVVGTGFPEDSVIFTDKIIRSNPTVEHLYPMGDKVLVGSFARTFSLRDGGYYSFVVDSLMHFKSAIHPSILQNGGPMFAFRRVEEHHSNTELEIVEYQHAFKTPIAFA*	T12N:R32C:K36N:L50M:N78S:K89R:A136P:H142Y:N147K:H172L:L199H:G206E	T23N:R43C:K47N:L61M:N91S:K102R:A150P:H156Y:N162K:H187L:L214H:G226E	pplu	12	3	4.5229588	4.4684553	ATGCCAGCCATGAAAATCGAATGTCGCATTACGGGCAATCTGAACGGCGTGGAGTTCGAGCTCGTAGGCGGGGGCGAGGGCACCCCGGAACAGGGCTGTATGACCAACAACATGAAGTCCACCAAAGGCGCACTGACCTTTTCTCCGTACATGCTCAGCCACGTTATGGGTTACGGCTTCTATCACTTCGGCACGTACCCCTCCGGTTACGAGAATCCGTTCCTCCACGCTATCAGTAACGGTGGCTACACAAATACGCGCATTGAACGTTACGAGGACGGCGGCGTCCTTCACGTATCATTCTCATATCGTTATGAGGCGGGTCGCGTGATCGGCGACTTCAAGGTAGTGGGCACAGGCTTCCCTGAGGACTCAGTCATCTTTACGGACAAGATCATT…	1	pplu12_1559	H9	45
MPAMKIECRITGTLNGVEFELVGGGVGNPEQGLMANKMKSTKGALTFSPYLLSHVMGYGFYHFGTYPSGYENPFLHAINNGGYTNTRIERYEDGGVLHVSFSYRYEAGRVIGDFKVAGTGFPEDSVIFTDKIICSNASVEHLHPMGDDVLVGAFARTFSLRGGGYYSFVVDSHMHFKSAIHPSILHNGGPMFAFRSVEEVHSNTELRIAEHQHAFMTPIAFA*	E25V:T27N:R32L:T34A:K89R:V116A:R133C:T137S:N147D:S152A:D161G:Q185H:R195S:L199V:G206R:V208A:Y210H:K215M	E36V:T38N:R43L:T45A:K102R:V129A:R147C:T151S:N162D:S167A:D176G:Q200H:R210S:L214V:G226R:V228A:Y230H:K235M	pplu	18	4	4.464095	4.466202	ATGCCAGCCATGAAAATCGAATGTCGCATTACGGGCACTCTGAACGGCGTGGAGTTCGAGCTCGTAGGCGGGGGCGTAGGCAATCCGGAACAGGGCCTTATGGCAAACAAGATGAAGTCCACCAAAGGCGCACTGACCTTTTCTCCGTACCTGCTCAGCCACGTTATGGGTTACGGCTTCTATCACTTCGGCACGTACCCCTCCGGTTACGAGAATCCGTTCCTCCACGCTATCAACAACGGTGGCTACACAAATACGCGCATTGAACGTTACGAGGACGGCGGCGTCCTTCACGTATCATTCTCATATCGTTATGAGGCGGGTCGCGTGATCGGCGACTTCAAGGTAGCCGGCACAGGCTTCCCTGAGGACTCAGTCATCTTTACGGACAAGATCATT…	1	pplu18_876	A10	58
MPDMKIECRITGTLNGVEFELVGGGEGTPEQGLMTNKMKYTKGALTFSPYLLSHVMGYGFYHFGMYPSGYENPFLHAISNGGYTNTRIEKYEDGGVLHVSFSYRYESRRVIGDFKVVGTGFPEDSVIFTDKIIRSNATVEHFHLMGDNLLVGSFARTFSLRDGGYYSFVVDSQMHFKSAIHPSILQNDGPMFAFRRVVEHYSNTELEIVEFQHAFKTPIAFE*	A2D:R32L:S39Y:T64M:N78S:A106S:G107R:L141F:P143L:V148L:H172Q:G187D:E197V:L199H:H200Y:G206E:Y210F:A221E	A2D:R43L:S50Y:T75M:N91S:A119S:G120R:L155F:P157L:V163L:H187Q:G202D:E212V:L214H:H215Y:G226E:Y230F:A241E	pplu	18	7	4.5501223	4.536247	ATGCCAGATATGAAAATCGAATGTCGCATTACGGGCACTCTGAACGGCGTGGAGTTCGAGCTCGTAGGCGGGGGCGAGGGCACCCCGGAACAGGGCTTAATGACCAACAAGATGAAGTACACCAAAGGCGCACTGACCTTTTCTCCGTACCTGCTCAGCCACGTTATGGGTTACGGCTTCTATCACTTCGGCATGTACCCCTCCGGTTACGAGAATCCGTTCCTCCACGCTATCTCTAACGGTGGCTACACAAATACGCGCATTGAAAAGTACGAGGACGGCGGCGTCCTTCACGTATCATTCTCATATCGTTATGAGAGCCGCCGCGTGATCGGCGACTTCAAGGTAGTGGGCACAGGCTTCCCTGAGGACTCAGTCATCTTTACGGACAAGATCATT…	1	pplu18_32	B10	4
MSDIKIECRITGTLNGVEFELVGGGEGNPEQGRMTNKMKSTKGALTFSPHLLSHVMGYGFYHFGTYSSGYENPFLHAINNGGYTNTRIEKYEDGGVLHVSFSYRYEAGRVIGDFKVEGTGFPKDSVIFTDKIIRSNATVEHLHPMGDKVLVGSFARTFSLRDGGYYSFVVDSHMHFKNAIHPSILQNGGPMFAFRSVVEVHSNTKLEIVEYQDAFTTPIAFE*	P1S:A2D:M3I:T27N:Y49H:P66S:V116E:E122K:N147K:S177N:R195S:E197V:L199V:E204K:G206E:H212D:K215T:A221E	P1S:A2D:M14I:T38N:Y60H:P77S:V129E:E135K:N162K:S192N:R210S:E212V:L214V:E224K:G226E:H232D:K235T:A241E	pplu	18	6	4.582067	4.572253	ATGTCAGACATTAAAATCGAATGTCGCATTACGGGCACTCTGAACGGCGTGGAGTTCGAGCTCGTAGGCGGGGGCGAGGGCAACCCGGAACAGGGCCGCATGACCAACAAGATGAAGTCCACCAAAGGCGCACTGACCTTTTCTCCGCATCTGCTCAGCCACGTTATGGGTTACGGCTTCTATCACTTCGGCACGTACTCTTCCGGTTACGAGAATCCGTTCCTCCACGCTATCAACAACGGTGGCTACACAAATACGCGCATTGAAAAGTACGAGGACGGCGGCGTCCTTCACGTATCATTCTCATATCGTTATGAGGCGGGTCGCGTGATCGGCGACTTCAAGGTAGAAGGCACAGGCTTCCCTAAAGACTCAGTCATCTTTACGGACAAGATCATT…	1	pplu18_214	C10	4
MQAMKIECRITGTLNGVEFELVGGGEGTPEQGCMTNKMKSTKGALTFSPYLLSHVMGYGFYHFGTYPSDYENPFLHAINNGGYTNTRIEKYEDGGVLHVSFSYRYEAGRVIGDFKVMGTGFPEDSVIFTDKIIGSNATVEHLHPVADNVLVGSFARTFSLRDGGYYSYVVDSHMHFRSALHPSILQNDGPMFAFRHVDEHHSNTELGIVEYQHAFTTPIDIE*	P1Q:R32C:G68D:V116M:R133G:M144V:G145A:F167Y:K176R:I179L:G187D:R195H:E197D:L199H:K215T:A219D:F220I:A221E	P1Q:R43C:G79D:V129M:R147G:M158V:G160A:F182Y:K191R:I194L:G202D:R210H:E212D:L214H:K235T:A239D:F240I:A241E	pplu	18	8	4.503125	4.5969515	ATGCAAGCCATGAAAATCGAATGTCGCATTACGGGCACTCTGAACGGCGTGGAGTTCGAGCTCGTAGGCGGGGGCGAGGGCACCCCGGAACAGGGCTGCATGACCAACAAGATGAAGTCCACCAAAGGCGCACTGACCTTTTCTCCGTACCTGCTCAGCCACGTTATGGGTTACGGCTTCTATCACTTCGGCACGTACCCCTCCGACTACGAGAATCCGTTCCTCCACGCTATCAACAACGGTGGCTACACAAATACGCGCATTGAAAAGTACGAGGACGGCGGCGTCCTTCACGTATCATTCTCATATCGTTATGAGGCGGGTCGCGTGATCGGCGACTTCAAGGTAATGGGCACAGGCTTCCCTGAGGACTCAGTCATCTTTACGGACAAGATCATT…	1	pplu18_308	D10	174
MQAMKIECRITGTLNGVEFELVGGGEGIPEQGCMTNKMKSTKGALTFSPYLLSHVMGYGFYHFGTYPSGYENPFLHAINNGGYTNTRIEKFEDGGVLHVSFSYRYEGGRVIGDFKVMGTGFPEASVIFTDRIIGSNATVEHLHPMGDNVLVGSFARTFSLRDGGYYSYVVDSHMHFKSAIHPSILQNDGPMFAFRHVEEHHSNTELGIVEFQHAFTTPIDIE*	P1Q:T27I:R32C:Y90F:A106G:V116M:D123A:K130R:R133G:F167Y:G187D:R195H:L199H:Y210F:K215T:A219D:F220I:A221E	P1Q:T38I:R43C:Y103F:A119G:V129M:D136A:K143R:R147G:F182Y:G202D:R210H:L214H:Y230F:K235T:A239D:F240I:A241E	pplu	18	7	4.552035	4.633665	ATGCAAGCCATGAAAATCGAATGTCGCATTACGGGCACTCTGAACGGCGTGGAGTTCGAGCTCGTAGGCGGGGGCGAGGGCATTCCGGAACAGGGCTGCATGACCAACAAGATGAAGTCCACCAAAGGCGCACTGACCTTTTCTCCGTACCTGCTCAGCCACGTTATGGGTTACGGCTTCTATCACTTCGGCACGTACCCCTCCGGTTACGAGAATCCGTTCCTCCACGCTATCAACAACGGTGGCTACACAAATACGCGCATTGAAAAGTTTGAGGACGGCGGCGTCCTTCACGTATCATTCTCATATCGTTATGAGGGGGGTCGCGTGATCGGCGACTTCAAGGTAATGGGCACAGGCTTCCCTGAGGCTTCAGTCATCTTTACGGACCGCATCATT…	1	pplu18_304	E10	156
MPDMKIECRIAGTLNGVEFELVGGGEGTPEQGRMTNNMKPTKGALTFSPYLLSHVMGYGFYHFGTYPSGYENPFLHAINNGGYTNTRNEKYEDGGVLHVSFAYRYAAGRVIGDFKVVGTGFPEDSVIFTDKIIGSNATVEHLHPMGDNLLVGSFARTFSLRDGGYYSYVVDSLMHFKSAIHPSILQNGGPMFAFRSVEERHSNTELEIVEFQHAFETPIDFT*	A2D:T10A:K36N:S39P:I87N:S101A:E105A:R133G:V148L:F167Y:H172L:R195S:L199R:G206E:Y210F:K215E:A219D:A221T	A2D:T21A:K47N:S50P:I100N:S114A:E118A:R147G:V163L:F182Y:H187L:R210S:L214R:G226E:Y230F:K235E:A239D:A241T	pplu	18	8	4.659693	4.6105013	ATGCCAGACATGAAAATCGAATGTCGCATTGCAGGCACTCTGAACGGCGTGGAGTTCGAGCTCGTAGGCGGGGGCGAGGGCACCCCGGAACAGGGCCGCATGACCAACAATATGAAGCCAACCAAAGGCGCACTGACCTTTTCTCCGTACCTGCTCAGCCACGTTATGGGTTACGGCTTCTATCACTTCGGCACGTACCCCTCCGGTTACGAGAATCCGTTCCTCCACGCTATCAACAACGGTGGCTACACAAATACGCGCAACGAAAAGTACGAGGACGGCGGCGTCCTTCACGTATCATTCGCATATCGTTATGCGGCGGGTCGCGTGATCGGCGACTTCAAGGTAGTGGGCACAGGCTTCCCTGAGGACTCAGTCATCTTTACGGACAAGATCATT…	1	pplu18_1710	F10	114
MPDMKIECRIAGTLNGVEFELVGGGEGTPEQGCMTNNMKPTKGALTFSPYLLSHVMGYGFYHFGMYPSDYENPFLHAINNGGYTNTRNEKYEDGGVLHVSFSYRYAAGRVIGDFKVVGTGFPEDSVIFTDKIIGSNATVEHLHPMGDNVLVGSFARTFSLRDGGYYSYVVDSHMHFKSAIHPSILQNGGPMFAFRSVEELHSNTELEIVEFQNAFKTPNDFT*	A2D:T10A:R32C:K36N:S39P:T64M:G68D:I87N:E105A:R133G:F167Y:R195S:G206E:Y210F:H212N:I218N:A219D:A221T	A2D:T21A:R43C:K47N:S50P:T75M:G79D:I100N:E118A:R147G:F182Y:R210S:G226E:Y230F:H232N:I238N:A239D:A241T	pplu	18	8	4.5502234	4.567544	ATGCCAGATATGAAAATCGAATGTCGCATTGCTGGCACTCTGAACGGCGTGGAGTTCGAGCTCGTAGGCGGGGGCGAGGGCACCCCGGAACAGGGCTGTATGACCAACAACATGAAGCCAACCAAAGGCGCACTGACCTTTTCTCCGTACCTGCTCAGCCACGTTATGGGTTACGGCTTCTATCACTTCGGCATGTACCCCTCCGATTACGAGAATCCGTTCCTCCACGCTATCAACAACGGTGGCTACACAAATACGCGCAACGAAAAGTACGAGGACGGCGGCGTCCTTCACGTATCATTCTCATATCGTTATGCGGCGGGTCGCGTGATCGGCGACTTCAAGGTAGTGGGCACAGGCTTCCCTGAGGACTCAGTCATCTTTACGGACAAGATCATT…	1	pplu18_1728	G10	3
MPDMKIECRITGTLNGVKFELAGGGEGTPEQGCMANNMNSTKGALTFSPYLLSHVMGYGFYHFGMYPSGYENPFLHAINNGGYTNTRIEKYEDGGVLYVSFAYRYEAGRVIGDFKVVGTGFPEDSVIFTDKIIGSNATVEHLHPMGDNVLVGSFARTFSLRDGGYYSYVVDSLMHFKSAIHPSILQNGGPMFAFRSVEELHSNTELEIVEFQHAFKTPIDFT*	A2D:E17K:V21A:R32C:T34A:K36N:K38N:T64M:H97Y:S101A:R133G:F167Y:H172L:R195S:G206E:Y210F:A219D:A221T	A2D:E28K:V32A:R43C:T45A:K47N:K49N:T75M:H110Y:S114A:R147G:F182Y:H187L:R210S:G226E:Y230F:A239D:A241T	pplu	18	6	4.5846186	4.560508	ATGCCAGATATGAAAATCGAATGTCGCATTACGGGCACTCTGAACGGCGTGAAATTCGAGCTCGCTGGCGGGGGCGAGGGCACCCCGGAACAGGGCTGTATGGCCAACAATATGAACTCCACCAAAGGCGCACTGACCTTTTCTCCGTACCTGCTCAGCCACGTTATGGGTTACGGCTTCTATCACTTCGGCATGTACCCCTCCGGTTACGAGAATCCGTTCCTCCACGCTATCAACAACGGTGGCTACACAAATACGCGCATTGAAAAGTACGAGGACGGCGGCGTCCTTTATGTATCATTCGCGTATCGTTATGAGGCGGGTCGCGTGATCGGCGACTTCAAGGTAGTGGGCACAGGCTTCCCTGAGGACTCAGTCATCTTTACGGACAAGATCATT…	1	pplu18_1735	H10	3
MPAMKIECRITGTLNGVEFELVGGGEGTPERGRMSNNMKSAKGALTFSPYLLSHVMGYGFYHFGTYPSGYENPFLHAINNGGYTNTRIEKYEDGGVLHVSFSYCYEEGRVIGDFKVVGTGFPKDSIIFTDKIIRSNATVEHLHPRGDNVLVGSFARTFSLRDGGYYSFVVDSQMHFKSAIHASILQNGGPMFAFRRVDEFHSNTKLEVVEFQDAFKTPIAFA*	Q30R:T34S:K36N:T40A:R103C:A106E:E122K:V125I:M144R:H172Q:P181A:E197D:L199F:E204K:G206E:I207V:Y210F:H212D	Q41R:T45S:K47N:T51A:R116C:A119E:E135K:V138I:M158R:H187Q:P196A:E212D:L214F:E224K:G226E:I227V:Y230F:H232D	pplu	18	8	4.4748015	4.5084133	ATGCCAGCCATGAAAATCGAATGTCGCATTACGGGCACTCTGAACGGCGTGGAGTTCGAGCTCGTAGGCGGGGGCGAGGGCACCCCGGAACGCGGCCGCATGTCAAACAACATGAAGTCCGCAAAAGGCGCACTGACCTTTTCTCCGTACCTGCTCAGCCACGTTATGGGTTACGGCTTCTATCACTTCGGCACGTACCCCTCCGGTTACGAGAATCCGTTCCTCCACGCTATCAACAACGGTGGCTACACAAATACGCGCATTGAAAAGTACGAGGACGGCGGCGTCCTTCACGTATCATTCTCATATTGTTATGAGGAGGGTCGCGTGATCGGCGACTTCAAGGTAGTGGGCACAGGCTTCCCTAAAGACTCAATAATCTTTACGGACAAGATCATT…	1	pplu18_2364	A11	5
MPSMKIECRITGTLNGVEFELVGGGEGIPEQGSMSNKMKSTKGALTFSPYLLSHVMGYGFYHFGTYPSGYENPFLHAINNGGYTNTRIEKYEDGGVLHVSFSYRYEAGRVIGDFKVVGTGFPEDSVIFTDRIIGSNATVEHLHPMGENVLVGSFARTFSLRDGGYYSYVVDSHMHFRSAIHPSILQNDGPMFAFRHVDEHHSNTELGIVEFQHAFTTPIDIE*	A2S:T27I:R32S:T34S:K130R:R133G:D146E:F167Y:K176R:G187D:R195H:E197D:L199H:Y210F:K215T:A219D:F220I:A221E	A2S:T38I:R43S:T45S:K143R:R147G:D161E:F182Y:K191R:G202D:R210H:E212D:L214H:Y230F:K235T:A239D:F240I:A241E	pplu	18	8	4.703293	4.4548054	ATGCCATCCATGAAAATCGAATGTCGCATTACGGGCACTCTGAACGGCGTGGAGTTCGAGCTCGTAGGCGGGGGCGAGGGCATTCCGGAACAGGGCAGTATGTCCAACAAGATGAAGTCCACCAAAGGCGCACTGACCTTTTCTCCGTACCTGCTCAGCCACGTTATGGGTTACGGCTTCTATCACTTCGGCACGTACCCCTCCGGTTACGAGAATCCGTTCCTCCACGCTATCAACAACGGTGGCTACACAAATACGCGCATTGAAAAGTACGAGGACGGCGGCGTCCTTCACGTATCATTCTCATATCGTTATGAGGCGGGTCGCGTGATCGGCGACTTCAAGGTAGTGGGCACAGGCTTCCCTGAGGACTCAGTCATCTTTACGGACCGGATCATT…	1	pplu18_387	B11	221
MPAMKIECRITGTLNGVEFELVGGGEGTPERGCMSNNMKSAKGPLTFSPYLLSHVMGYGFYHFGTYPSGYENPFLHAINNGGYTNTRIEKYEDGGVLHVSFSYCYEEGRVIGDFKVVGTGFPKDSVIFTDKIIRSNATVEHLHPRGDNVLVGSFARTFSLRDGGYYSFVVDSHMHFKSAIHASILQNGGPMFAFRCVDELHSNIELEIVEYQDAFTTPIALA*	Q30R:R32C:T34S:K36N:T40A:A43P:R103C:A106E:E122K:M144R:P181A:R195C:E197D:T203I:G206E:H212D:K215T:F220L	Q41R:R43C:T45S:K47N:T51A:A54P:R116C:A119E:E135K:M158R:P196A:R210C:E212D:T223I:G226E:H232D:K235T:F240L	pplu	18	8	4.5604777	4.5485916	ATGCCAGCCATGAAAATCGAATGTCGCATTACGGGCACTCTGAACGGCGTGGAGTTCGAGCTCGTAGGCGGGGGCGAGGGCACCCCGGAACGCGGCTGTATGTCTAACAACATGAAGTCCGCCAAAGGCCCGCTGACCTTTTCTCCGTACCTGCTCAGCCACGTTATGGGTTACGGCTTCTATCACTTCGGCACGTACCCCTCCGGTTACGAGAATCCGTTCCTCCACGCTATCAACAACGGTGGCTACACAAATACGCGCATTGAAAAGTACGAGGACGGCGGCGTCCTTCACGTATCATTCTCATATTGTTATGAGGAAGGTCGCGTGATCGGCGACTTCAAGGTAGTGGGCACAGGCTTCCCTAAAGACTCAGTCATCTTTACGGACAAGATCATT…	1	pplu18_2337	C11	11
MPAMKIECRITGTLNGVEFELVGGGEGTPERGCMSNNMKSAKGALPFSPYLLSHVMGYGFYHFGTYPSGYENPFLHAINNGGYTNTRIEKYEDGGVLHVLFSYRYEAGRVIGDFNVVGTGFPEDSVIFTDKIIRSNATVEHLHPRGDNVLVGSFARTFSLRDGGYYSFVVDSQMHFNSAIHPSILQNGGPMFAFRRVDEFHSNIELEIVEFQDAFKTPIDFA*	Q30R:R32C:T34S:K36N:T40A:T45P:S99L:K114N:M144R:H172Q:K176N:E197D:L199F:T203I:G206E:Y210F:H212D:A219D	Q41R:R43C:T45S:K47N:T51A:T56P:S112L:K127N:M158R:H187Q:K191N:E212D:L214F:T223I:G226E:Y230F:H232D:A239D	pplu	18	8	4.6953354	4.5986905	ATGCCAGCCATGAAAATCGAATGTCGCATTACGGGCACTCTGAACGGCGTGGAGTTCGAGCTCGTAGGCGGGGGCGAGGGCACCCCGGAACGTGGCTGTATGAGTAACAACATGAAGTCCGCAAAAGGCGCACTGCCCTTTTCTCCGTACCTGCTCAGCCACGTTATGGGTTACGGCTTCTATCACTTCGGCACGTACCCCTCCGGTTACGAGAATCCGTTCCTCCACGCTATCAACAACGGTGGCTACACAAATACGCGCATTGAAAAGTACGAGGACGGCGGCGTCCTTCACGTACTTTTCTCATATCGTTATGAGGCGGGTCGCGTGATCGGCGACTTCAACGTAGTGGGCACAGGCTTCCCTGAGGACTCAGTCATCTTTACGGACAAGATCATT…	1	pplu18_2309	D11	36
MPAMKIECRITGTLNSVEFELVGGGKGSPELGCMTNKMKPTKGALTFSPYLLSHIMGYGFYHFGSYPSGYENPFHQAINNGGYTNTRIEKYEDGGVLHVSFSYRYGARRVIGDFKVVGTGFPEDSVIFTDKIIRSNASVEHLHPMGDNVLVGSFARTFSLRDGRYYSFVVDSRMDFKSAIHPSIRQNAGPMFAFRSVEEHHSNTELEIVEYQHAFRTPIAIE*	G15S:E25K:T27S:Q30L:R32C:S39P:V54I:T64S:L74H:H75Q:E105G:G107R:T137S:G163R:H172R:H174D:L184R:G187A:R195S:L199H:G206E:K215R:F220I:A221E	G26S:E36K:T38S:Q41L:R43C:S50P:V65I:T75S:L87H:H88Q:E118G:G120R:T151S:G178R:H187R:H189D:L199R:G202A:R210S:L214H:G226E:K235R:F240I:A241E	pplu	24	16	4.359741	4.5530205	ATGCCAGCCATGAAAATCGAATGTCGCATTACGGGCACTCTGAACAGTGTGGAGTTCGAGCTCGTAGGCGGGGGCAAGGGCTCGCCGGAACTGGGCTGCATGACCAACAAGATGAAGCCGACCAAAGGCGCACTGACCTTTTCTCCGTACCTGCTCAGCCACATCATGGGTTACGGCTTCTATCACTTCGGCTCATACCCCTCCGGTTACGAGAATCCGTTCCATCAAGCTATCAACAACGGTGGCTACACAAATACGCGCATTGAAAAGTACGAGGACGGCGGCGTCCTTCACGTATCATTCTCATATCGTTATGGTGCGCGCCGCGTGATCGGCGACTTCAAGGTAGTGGGCACAGGCTTCCCTGAGGACTCAGTCATCTTTACGGACAAGATCATT…	1	pplu24_2302	E11	5
MPTMKIECRITGSLNGAEFELVGGGEGAPEQGSMTNEMKSTKGPLTFSPYLLSHVMGYGFYHFGTYPSDYENPFHQAINNGGYTNTRIEKYEDGGVLHISFSYRYEARRVIGDFKVVGTGFPEDSVIFTDKIIRSNASVEHLHPMGDNVLVGSFARTFSLRDGGYYSYVADSHMHFKRAIHPSILQNGGPMFAFRRVEERHSNTELRIAEFQHAFETAIALE*	A2T:T12S:V16A:T27A:R32S:K36E:A43P:G68D:L74H:H75Q:V98I:G107R:T137S:F167Y:V169A:S177R:L199R:G206R:V208A:Y210F:K215E:P217A:F220L:A221E	A2T:T23S:V27A:T38A:R43S:K47E:A54P:G79D:L87H:H88Q:V111I:G120R:T151S:F182Y:V184A:S192R:L214R:G226R:V228A:Y230F:K235E:P237A:F240L:A241E	pplu	24	11	4.4068985	4.602793	ATGCCAACCATGAAAATCGAATGTCGCATTACGGGCAGCCTGAACGGCGCAGAGTTCGAGCTCGTAGGCGGGGGCGAGGGCGCACCGGAACAGGGCTCAATGACCAACGAGATGAAGTCCACCAAAGGCCCGCTGACCTTTTCTCCGTACCTGCTCAGCCACGTTATGGGTTACGGCTTCTATCACTTCGGCACGTACCCCTCCGATTACGAGAATCCGTTCCACCAAGCTATCAACAACGGTGGCTACACAAATACGCGCATTGAAAAGTACGAGGACGGCGGCGTCCTTCACATCTCATTCTCATATCGTTATGAGGCGCGTCGCGTGATCGGCGACTTCAAGGTAGTGGGCACAGGCTTCCCTGAGGACTCAGTCATCTTTACGGACAAGATCATT…	1	pplu24_4002	F11	4
MPAMKIECRITGTLNGVEFELVGGGEGIPELGLMTNNLKATKGALTFSPYLLSHVMGYGFYHFGTYPSGYENPYFHAVTNGGYTNTRIEKYEDGGFLQASFSYRYEAGRVIGDFKVVGTGFPKDSVIFTDKIISSNATVEHLHTMGDNVLVGSFARTFSLRDGGYYSSVVDSHMHFKSAIHPSILQNGGPMFAFRRVEEFHSNTKMEIVEFQDAFKTPIAFP*	T27I:Q30L:R32L:K36N:M37L:S39A:F73Y:L74F:I77V:N78T:V95F:H97Q:V98A:E122K:R133S:P143T:F167S:L199F:E204K:L205M:G206E:Y210F:H212D:A221P	T38I:Q41L:R43L:K47N:M48L:S50A:F86Y:L87F:I90V:N91T:V108F:H110Q:V111A:E135K:R147S:P157T:F182S:L214F:E224K:L225M:G226E:Y230F:H232D:A241P	pplu	24	10	4.2430687	4.5112786	ATGCCAGCCATGAAAATCGAATGTCGCATTACGGGCACTCTGAACGGCGTGGAGTTCGAGCTCGTAGGCGGGGGCGAGGGCATACCGGAACTCGGCCTGATGACCAACAACTTGAAGGCGACCAAAGGCGCACTGACCTTTTCTCCGTACCTGCTCAGCCACGTTATGGGTTACGGCTTCTATCACTTCGGCACGTACCCCTCCGGTTACGAGAATCCGTATTTTCACGCTGTTACAAACGGTGGCTACACAAATACGCGCATTGAAAAGTACGAGGACGGCGGCTTCCTTCAGGCCTCATTCTCATATCGTTATGAGGCGGGTCGCGTGATCGGCGACTTCAAGGTAGTGGGCACAGGCTTCCCTAAGGACTCAGTCATCTTTACGGACAAGATCATT…	1	pplu24_4131	G11	3
MPAMKIECRITGTMNGVEFELVGGGEGTPDQGCMTNKMKSTKGALIFSPYLLSHVMGYGFYHFGTYPSGYENPFLNAIKKGGYTNTRIEKSEDGGVLQVSFSYRYETGRVIGDFKVMGTGFPEDSVIFTDKIIRSNSTVEHLYPMGDNVLVGSFTRTFSLRDGGYYSFAVDSLMHFKSAIHPSILQNGGPMFAFRCVVEHYSNTKLEIVEYQHAFKTPLAFE*	L13M:E29D:R32C:T45I:H75N:N78K:N79K:Y90S:H97Q:A106T:V116M:A136S:H142Y:A154T:V168A:H172L:R195C:E197V:L199H:H200Y:E204K:G206E:I218L:A221E	L24M:E40D:R43C:T56I:H88N:N91K:N92K:Y103S:H110Q:A119T:V129M:A150S:H156Y:A169T:V183A:H187L:R210C:E212V:L214H:H215Y:E224K:G226E:I238L:A241E	pplu	24	9	4.2663136	4.4190207	ATGCCAGCCATGAAAATCGAATGTCGCATTACGGGCACTATGAACGGCGTGGAGTTCGAGCTCGTAGGCGGGGGCGAGGGCACCCCGGACCAGGGCTGTATGACCAACAAGATGAAGTCCACCAAAGGCGCACTGATCTTTTCTCCGTACCTGCTCAGCCACGTTATGGGTTACGGCTTCTATCACTTCGGCACGTACCCCTCCGGTTACGAGAATCCGTTCCTCAACGCTATCAAGAAAGGTGGCTACACAAATACGCGCATTGAAAAGAGCGAGGACGGCGGCGTCCTTCAGGTATCATTCTCATATCGTTATGAGACAGGTCGCGTGATCGGCGACTTCAAGGTAATGGGCACAGGCTTCCCTGAGGACTCAGTCATCTTTACGGACAAGATCATT…	1	pplu24_3262	H11	4
MPAMKIACRITGTLNGVEFELLGGGEGTPGRGRMNNKMKSTKGALTFSPYLLSHVMGYGFYHFGTYPSGYENPFLHAINNGGYTNTRIEKYEDGGVLHISFSYRYEAGSVIGDFKVVGTGFPEDSLIFTDKIIGSNATVEHLHPMADKVLVGSFARTFSLRDGGYYSSVVDSLMHFESAIHPSILENDGPMFAFRCVVEFHSNTELEIVEYQRAFTTPIDVA*	E6A:V21L:E29G:Q30R:T34N:V98I:R108S:V125L:R133G:G145A:N147K:F167S:H172L:K176E:Q185E:G187D:R195C:E197V:L199F:G206E:H212R:K215T:A219D:F220V	E17A:V32L:E40G:Q41R:T45N:V111I:R121S:V138L:R147G:G160A:N162K:F182S:H187L:K191E:Q200E:G202D:R210C:E212V:L214F:G226E:H232R:K235T:A239D:F240V	pplu	24	8	4.29844	4.5379906	ATGCCAGCCATGAAAATCGCTTGTCGCATTACGGGCACTCTGAACGGCGTGGAGTTCGAGCTCTTGGGCGGGGGCGAGGGCACCCCGGGACGTGGCCGCATGAACAACAAGATGAAGTCCACCAAAGGCGCACTGACCTTTTCTCCGTACCTGCTCAGCCACGTTATGGGTTACGGCTTCTATCACTTCGGCACGTACCCCTCCGGTTACGAGAATCCGTTCCTCCACGCTATCAACAACGGTGGCTACACAAATACGCGCATTGAAAAGTACGAGGACGGCGGCGTCCTTCACATATCATTCTCATATCGTTATGAGGCGGGTTCCGTGATCGGCGACTTCAAGGTAGTGGGCACAGGCTTCCCTGAGGACTCACTCATCTTTACGGACAAGATCATT…	1	pplu24_1135	A12	70
MPAMKIECRISGTLNGVDFELIGGGKGTPEQGSMSNKMRSTKGALTFSPYLLSHVMGYGFYHFGTYPSGYENPFLHAINNGGYTNTRIEKYEDGGVLHISFSYRYKAGRVNGDFKVVGTDFPEDSVIFTDKIIRSNASVEHLHSMGDNVLVGSFARTFTLRDGGYYSFVADSHMHFKSAIHPSILQNVGPMFAFRRVEERHSTTELEIAECQHAFETPIDIA*	T10S:E17D:V21I:E25K:R32S:T34S:K38R:V98I:E105K:I110N:G119D:T137S:P143S:S158T:V169A:G187V:L199R:N202T:G206E:V208A:Y210C:K215E:A219D:F220I	T21S:E28D:V32I:E36K:R43S:T45S:K49R:V111I:E118K:I123N:G132D:T151S:P157S:S173T:V184A:G202V:L214R:N222T:G226E:V228A:Y230C:K235E:A239D:F240I	pplu	24	8	4.2610397	4.518713	ATGCCAGCCATGAAAATCGAATGTCGCATTTCCGGCACTCTGAACGGCGTGGATTTCGAGCTCATCGGCGGGGGCAAGGGCACCCCGGAACAGGGCTCAATGTCTAACAAGATGCGCTCCACCAAAGGCGCACTGACCTTTTCTCCGTACCTGCTCAGCCACGTTATGGGTTACGGCTTCTATCACTTCGGCACGTACCCCTCCGGTTACGAGAATCCGTTCCTCCACGCTATCAACAACGGTGGCTACACAAATACGCGCATTGAAAAGTACGAGGACGGCGGCGTCCTTCACATTTCATTCTCATATCGTTATAAGGCGGGTCGCGTGAATGGCGACTTCAAGGTAGTGGGCACAGACTTCCCTGAGGACTCAGTCATCTTTACGGACAAGATCATT…	1	pplu24_5124	B12	45
MLAMKIECRITGTLNGMEFELVGGGVGNPEQGRMTNNMKSTKGALTFSPYLLSHVMGYGFYHFGTYPSGYANPFLHSINKGGYTNTRIEKYEDGGVLHVSFSYRYEAGRVMGDFKVVGTGFPEDSVIFTDKIIGSNATVEHLHPIGDNVLVGSFARTFSLRDGGYYSSVVDSHMHFKSAIHPSILKNGGPMFAFRSVEEIHTKTVLEIVEFQHTFKTPIGIE*	P1L:V16M:E25V:T27N:K36N:E70A:A76S:N79K:I110M:R133G:M144I:F167S:Q185K:R195S:L199I:S201T:N202K:E204V:G206E:Y210F:A213T:A219G:F220I:A221E	P1L:V27M:E36V:T38N:K47N:E81A:A89S:N92K:I123M:R147G:M158I:F182S:Q200K:R210S:L214I:S221T:N222K:E224V:G226E:Y230F:A233T:A239G:F240I:A241E	pplu	24	8	4.2866497	4.559066	ATGCTCGCCATGAAAATCGAATGTCGCATTACGGGCACTCTGAACGGCATGGAGTTCGAGCTCGTAGGCGGGGGCGTTGGCAACCCGGAACAGGGCCGCATGACCAACAACATGAAGTCCACCAAAGGCGCACTGACCTTTTCTCCGTACCTGCTCAGCCACGTTATGGGTTACGGCTTCTATCACTTCGGCACGTACCCCTCCGGTTACGCTAATCCGTTCCTCCACTCCATCAACAAGGGTGGCTACACAAATACGCGCATTGAAAAGTACGAGGACGGCGGCGTCCTTCACGTATCATTCTCATATCGTTATGAGGCGGGTCGCGTGATGGGCGACTTCAAGGTAGTGGGCACAGGCTTCCCTGAGGACTCAGTCATCTTTACGGACAAGATCATT…	1	pplu24_6525	C12	116
MPAMKIECRITGSLNGVDFELVGGGKGTPEQGLMSNEMNSTKGTLTFSPFLLSHVMGYGFYHFGTYPSGYENPFLHAIDNGGYTNTRIEKYEDGGVLHVSFTYRYKARRVIGDFKVVGTGFPEDSVIFTDKIIRSNATVEHLHPMGDNLLVGSFARTFSLRDGGYYSSVVDSHMHFKSAIHPSILQNGGPMFVFRSVVEFHSNSKLEIVEYQHAFKAPIAFE*	T12S:E17D:E25K:R32L:T34S:K36E:K38N:A43T:Y49F:N78D:S101T:E105K:G107R:V148L:F167S:A192V:R195S:E197V:L199F:T203S:E204K:G206E:T216A:A221E	T23S:E28D:E36K:R43L:T45S:K47E:K49N:A54T:Y60F:N91D:S114T:E118K:G120R:V163L:F182S:A207V:R210S:E212V:L214F:T223S:E224K:G226E:T236A:A241E	pplu	24	8	4.380962	4.562497	ATGCCAGCCATGAAAATCGAATGTCGCATTACGGGCTCTCTGAACGGCGTGGATTTCGAGCTCGTAGGCGGGGGCAAGGGCACCCCGGAACAGGGCTTGATGTCGAACGAGATGAATTCCACCAAAGGCACACTGACCTTTTCTCCGTTTCTGCTCAGCCACGTTATGGGTTACGGCTTCTATCACTTCGGCACGTACCCCTCCGGTTACGAGAATCCGTTCCTCCACGCTATCGACAACGGTGGCTACACAAATACGCGCATTGAAAAGTACGAGGACGGCGGCGTCCTTCACGTATCATTCACCTATCGTTATAAGGCGCGGCGCGTGATCGGCGACTTCAAGGTAGTGGGCACAGGCTTCCCTGAGGACTCAGTCATCTTTACGGACAAGATCATT…	1	pplu24_5742	D12	173
MPAMKIECRITGTLNGVEFELVGGGEGTPELGCMTNEMKSTKGALTFSPFLLSHVMGYGFYHFCMYPSGYENPFLHAINNGGYTNTRIEKYEDGGVLHVSFSYRYEAGCVIGDFKVMGTGFPKASVIFTDKIIRSNASVEHLHPMGENVLVGSFARTFSLRDGGYYSSVVVSQMHFKSAIHPSILQDGGPMFAYRSVVEHHSNTELEIVEFQDAFKTPIGFA*	Q30L:R32C:K36E:Y49F:G63C:T64M:R108C:V116M:E122K:D123A:T137S:D146E:F167S:D170V:H172Q:N186D:F193Y:R195S:E197V:L199H:G206E:Y210F:H212D:A219G	Q41L:R43C:K47E:Y60F:G74C:T75M:R121C:V129M:E135K:D136A:T151S:D161E:F182S:D185V:H187Q:N201D:F208Y:R210S:E212V:L214H:G226E:Y230F:H232D:A239G	pplu	24	8	4.406064	4.563339	ATGCCAGCCATGAAAATCGAATGTCGCATTACGGGCACTCTGAACGGCGTGGAGTTCGAGCTCGTAGGCGGGGGCGAGGGCACCCCGGAATTGGGCTGTATGACCAACGAGATGAAGTCCACCAAAGGCGCACTGACCTTTTCTCCGTTCCTGCTCAGCCACGTTATGGGTTACGGCTTCTATCACTTCTGTATGTACCCCTCCGGTTACGAGAATCCGTTCCTCCACGCTATCAACAACGGTGGCTACACAAATACGCGCATTGAAAAGTACGAGGACGGCGGCGTCCTTCACGTATCATTCTCATATCGTTATGAGGCGGGTTGCGTGATCGGCGACTTCAAGGTAATGGGCACAGGCTTCCCTAAGGCCTCAGTCATCTTTACGGACAAGATCATT…	1	pplu24_5827	E12	199
MPAMKIECRITGNLNGVDFELAGGGEGTPELGCLTNNMNSTKGELTFSPYLLSHVMGYGFYHFGTYPSGYENPFLHAINNGGYTNTRVEKYEDGGVLHVSFSYRYEARRVIGDFKVLGTGFPEDSVIFTEKIIGSNATVEHLHPLGDNMLVGSFARTFSLRDGGYYAYVVDSHMHFKSAIHPSILQNGGPMFAFRRVEEHHNNTKLGIVEYQHAFKTPFDVA*	T12N:E17D:V21A:Q30L:R32C:M33L:K36N:K38N:A43E:I87V:G107R:V116L:D129E:R133G:M144L:V148M:S166A:F167Y:L199H:S201N:E204K:I218F:A219D:F220V	T23N:E28D:V32A:Q41L:R43C:M44L:K47N:K49N:A54E:I100V:G120R:V129L:D142E:R147G:M158L:V163M:S181A:F182Y:L214H:S221N:E224K:I238F:A239D:F240V	pplu	24	7	4.24866	4.519976	ATGCCAGCCATGAAAATCGAATGTCGCATTACGGGCAACCTGAACGGCGTGGATTTCGAGCTCGCGGGCGGGGGCGAGGGCACCCCGGAACTTGGCTGTCTTACCAACAATATGAATTCCACCAAAGGCGAACTGACCTTTTCTCCGTACCTGCTCAGCCACGTTATGGGTTACGGCTTCTATCACTTCGGCACGTACCCCTCCGGTTACGAGAATCCGTTCCTCCACGCTATCAACAACGGTGGCTACACAAATACGCGCGTGGAAAAGTACGAGGACGGCGGCGTCCTTCACGTATCATTCTCATATCGTTATGAGGCGCGTCGCGTGATCGGCGACTTCAAGGTACTCGGCACAGGCTTCCCTGAGGACTCAGTCATCTTTACGGAGAAGATCATT…	1	pplu24_609	F12	24
MPAMKIECRITGTLNGVEFALIGGGKGIPEQGSMTNEMKSTKGALTFSPYLLSHVMGYGFYHFGTYTPGYENPFFHAINNGGYTNTRIEKYEDGGVLHVSFSYRYESGRVIGDFKVVGTGFPEDSVIFTDKIIRSNASVEHLHPKGDNVMVGSFARTFSLRDGGYYSYVAASLMHFKSAIHPSILQNGGPMFAFRCVEEHHRNTELRIVEFQHAFQTPVAFA*	E19A:V21I:E25K:T27I:R32S:K36E:P66T:S67P:L74F:A106S:T137S:M144K:L149M:F167Y:V169A:D170A:H172L:R195C:L199H:S201R:G206R:Y210F:K215Q:I218V	E30A:V32I:E36K:T38I:R43S:K47E:P77T:S78P:L87F:A119S:T151S:M158K:L164M:F182Y:V184A:D185A:H187L:R210C:L214H:S221R:G226R:Y230F:K235Q:I238V	pplu	24	7	4.2549214	4.409301	ATGCCAGCCATGAAAATCGAATGTCGCATTACGGGCACTCTGAACGGCGTGGAGTTCGCGCTCATCGGCGGGGGCAAAGGCATACCGGAACAGGGCTCTATGACCAACGAGATGAAGTCCACCAAAGGCGCACTGACCTTTTCTCCGTACCTGCTCAGCCACGTTATGGGTTACGGCTTCTATCACTTCGGCACGTACACACCGGGTTACGAGAATCCGTTCTTTCACGCTATCAACAACGGTGGCTACACAAATACGCGCATTGAAAAGTACGAGGACGGCGGCGTCCTTCACGTATCATTCTCATATCGTTATGAGTCGGGTCGCGTGATCGGCGACTTCAAGGTAGTGGGCACAGGCTTCCCTGAGGACTCAGTCATCTTTACGGACAAGATCATT…	1	pplu24_3993	G12	7
MLAMKIECRITGSLNGVEFELVGGGEGNPERGHMANKMKSTKGALTFSPYLLSHVMGYGFYHFGTYPSGYENPFLHAINNGGYTNTRIEKFEDGGVLHITFSYRYATGRVIGDFKVMGTGFPEDSLIFTDKIIRSNATVEHLHPKGGNVLVGSFARTFSLRDGGYYSYVVDSLMHFKRAIHPSILQDGGPMFAFRRVDELHSNTELEIVEFQHAFKTPIVFE*	P1L:T12S:T27N:Q30R:R32H:T34A:Y90F:V98I:S99T:E105A:A106T:V116M:V125L:M144K:D146G:F167Y:H172L:S177R:N186D:E197D:G206E:Y210F:A219V:A221E	P1L:T23S:T38N:Q41R:R43H:T45A:Y103F:V111I:S112T:E118A:A119T:V129M:V138L:M158K:D161G:F182Y:H187L:S192R:N201D:E212D:G226E:Y230F:A239V:A241E	pplu	24	6	4.2809057	4.5760164	ATGCTCGCCATGAAAATCGAATGTCGCATTACGGGCAGTCTGAACGGCGTGGAGTTCGAGCTCGTAGGCGGGGGCGAGGGCAACCCGGAACGGGGCCACATGGCTAACAAGATGAAGTCCACCAAAGGCGCACTGACCTTTTCTCCGTACCTGCTCAGCCACGTTATGGGTTACGGCTTCTATCACTTCGGCACGTACCCCTCCGGTTACGAGAATCCGTTCCTCCACGCTATCAACAACGGTGGCTACACAAATACGCGCATTGAAAAGTTCGAGGACGGCGGCGTCCTTCACATAACATTCTCATATCGTTATGCGACAGGTCGCGTGATCGGCGACTTCAAGGTAATGGGCACAGGCTTCCCTGAGGACTCATTGATCTTTACGGACAAGATCATT…	1	pplu24_4611	H12	6
MPALKIVCRITGTLNGVEFELVGGGKGTPELGRMTNNVKPTKGPLTFSPYLLSHVMGYGFYHFGTYPSGYENPFLHSINNGGYTNTRIERYEDGGVLHVSFSYRYKAGRVIGDFKVVGTGFPEDSVIFTDKIISSNATVEHLHPMGDKVLVGSFARTFSLRGGGYYSCVVDSHMDFKSAIHPSILEDGGPMFAFRHVEELHSNIELEIVEFQLAFKTPFAFA*	M3L:E6V:E25K:Q30L:K36N:M37V:S39P:A43P:A76S:K89R:E105K:R133S:N147K:D161G:F167C:H174D:Q185E:N186D:R195H:T203I:G206E:Y210F:H212L:I218F	M14L:E17V:E36K:Q41L:K47N:M48V:S50P:A54P:A89S:K102R:E118K:R147S:N162K:D176G:F182C:H189D:Q200E:N201D:R210H:T223I:G226E:Y230F:H232L:I238F	pplu					ATGCCAGCCCTTAAAATCGTGTGTCGCATTACGGGCACTCTGAACGGCGTGGAGTTCGAGCTCGTAGGCGGGGGCAAGGGCACCCCGGAATTAGGCCGCATGACCAACAATGTAAAGCCTACCAAAGGCCCGCTGACCTTTTCTCCGTACCTGCTCAGCCACGTTATGGGTTACGGCTTCTATCACTTCGGCACGTACCCCTCCGGTTACGAGAATCCGTTCCTCCACTCAATCAACAACGGTGGCTACACAAATACGCGCATTGAACGTTACGAGGACGGCGGCGTCCTTCACGTATCATTCTCATATCGTTATAAAGCGGGTCGCGTGATCGGCGACTTCAAGGTAGTGGGCACAGGCTTCCCTGAGGACTCAGTCATCTTTACGGACAAGATCATT…	2	pplu24_top175r_1	A1	21
MPAMKIECRITGTLNGVEFELVGGGGGTPEQGSMANKMKSTKGALTFSPYLLSHILGYGFYHFGTYPSGYENPFLYAISNGGYTNTRIEKYEDGGVLHVSFSYRYEAGRVIGDFKVVGTGFPKNSVIFTNKIIRSNATVEHLYPRGDTVLVGSFARTFTLRDGGYYSFVVDSNMQFKSAIHPSILQNGGPMFAFRCVEDVHRTTELGIVEYQHAFKTPTGFT*	E25G:R32S:T34A:V54I:M55L:H75Y:N78S:E122K:D123N:D129N:H142Y:M144R:N147T:S158T:H172N:H174Q:R195C:E198D:L199V:S201R:N202T:I218T:A219G:A221T	E36G:R43S:T45A:V65I:M66L:H88Y:N91S:E135K:D136N:D142N:H156Y:M158R:N162T:S173T:H187N:H189Q:R210C:E213D:L214V:S221R:N222T:I238T:A239G:A241T	pplu					ATGCCAGCCATGAAAATCGAATGTCGCATTACGGGCACTCTGAACGGCGTGGAGTTCGAGCTCGTAGGCGGGGGCGGCGGCACCCCGGAACAGGGCTCTATGGCGAACAAGATGAAGTCCACCAAAGGCGCACTGACCTTTTCTCCGTACCTGCTCAGCCACATTCTTGGTTACGGCTTCTATCACTTCGGCACGTACCCCTCCGGTTACGAGAATCCGTTCCTCTATGCTATCTCAAACGGTGGCTACACAAATACGCGCATTGAAAAGTACGAGGACGGCGGCGTCCTTCACGTATCATTCTCATATCGTTATGAGGCGGGTCGCGTGATCGGCGACTTCAAGGTAGTGGGCACAGGCTTCCCTAAGAATTCAGTCATCTTTACGAACAAGATCATT…	2	pplu24_top175r_4	A2	3
MPAMKIECRITGTLNGVEFELVGGGAGIPERGRMTNKMKSTKGALTFSPYLLSHVMGYGFYHFGTYPSGYENPFFHAIKNGGYRNTRIEKYEDGGVLNLSFTYRYEARRVIGDFKVVGTGFPEDSVIFTDKIICSNASVEHLHPLGNNVLVGSFARTFSLRDGGYYSSVVDSHMNFKGAIHPSILQNGGPMFAFRRVEELHIHTELAIDEYQDAFTTAIAFA*	E25A:T27I:Q30R:L74F:N78K:T83R:H97N:V98L:S101T:G107R:R133C:T137S:M144L:D146N:F167S:H174N:S177G:S201I:N202H:G206A:V208D:H212D:K215T:P217A	E36A:T38I:Q41R:L87F:N91K:T96R:H110N:V111L:S114T:G120R:R147C:T151S:M158L:D161N:F182S:H189N:S192G:S221I:N222H:G226A:V228D:H232D:K235T:P237A	pplu					ATGCCAGCCATGAAAATCGAATGTCGCATTACGGGCACTCTGAACGGCGTGGAGTTCGAGCTCGTAGGCGGGGGCGCTGGCATTCCGGAACGGGGCCGCATGACCAACAAGATGAAGTCCACCAAAGGCGCACTGACCTTTTCTCCGTACCTGCTCAGCCACGTTATGGGTTACGGCTTCTATCACTTCGGCACGTACCCCTCCGGTTACGAGAATCCGTTCTTCCACGCTATCAAAAACGGTGGCTACCGGAATACGCGCATTGAAAAGTACGAGGACGGCGGCGTCCTTAACTTGTCATTCACCTATCGTTATGAGGCGCGCCGCGTGATCGGCGACTTCAAGGTAGTGGGCACAGGCTTCCCTGAGGACTCAGTCATCTTTACGGACAAGATCATT…	2	pplu24_top175r_0	A3	3
MPAMKIACRISGTLNGVEFELVGGGEGTPEQGLLTNKMKSTKGALTFSPYLLSHVMGYGFYLFGTYPPDYENPFLHAINNGGYTNTRIEKYEDGGVLHISFSYRYEAGRVIGDFKVVGTGFPEDSVIFTDKIIRSNATVEHLHTMGENVLVGSFARTFSLRDGGFYSYLVDSHMHFKSAIHPSILQNGGPMFAFRRVVEFHNSTKLRILEYQQAFQTPIAVE*	E6A:T10S:R32L:M33L:H61L:S67P:G68D:V98I:P143T:D146E:Y164F:F167Y:V168L:E197V:L199F:S201N:N202S:E204K:G206R:V208L:H212Q:K215Q:F220V:A221E	E17A:T21S:R43L:M44L:H72L:S78P:G79D:V111I:P157T:D161E:Y179F:F182Y:V183L:E212V:L214F:S221N:N222S:E224K:G226R:V228L:H232Q:K235Q:F240V:A241E	pplu					ATGCCAGCCATGAAAATCGCCTGTCGCATTTCCGGCACTCTGAACGGCGTGGAGTTCGAGCTCGTAGGCGGGGGCGAGGGCACCCCGGAACAGGGCCTTCTTACCAACAAGATGAAGTCCACCAAAGGCGCACTGACCTTTTCTCCGTACCTGCTCAGCCACGTTATGGGTTACGGCTTCTATCTGTTCGGCACGTACCCCCCCGACTACGAGAATCCGTTCCTCCACGCTATCAACAACGGTGGCTACACAAATACGCGCATTGAAAAGTACGAGGACGGCGGCGTCCTTCACATCTCATTCTCATATCGTTATGAGGCGGGTCGCGTGATCGGCGACTTCAAGGTAGTGGGCACAGGCTTCCCTGAGGACTCAGTCATCTTTACGGACAAGATCATT…	2	pplu24_top175r_2	A4	3
MPAMKIECRITGTLNGVEFELVGGGVGSPEQGCMSNTMRSTKGALTFSPYLLSHVMGYGFYHFGMYPSGYENPFLHAITKGGYTNTRIEKYEDGGVLQVSFSYRYEEGRVIGEFKVVGTGFPEDSVIFTDKIIRSNETVEHLHPMGANVLIGSFARTFSLRDGGYYSFVVDSHMHFKSAIHPSILQNGGPMFAFRLVEERYTKTELGIFEYQYAFKSPNAFA*	E25V:T27S:R32C:T34S:K36T:K38R:T64M:N78T:N79K:H97Q:A106E:D112E:A136E:D146A:V150I:R195L:L199R:H200Y:S201T:N202K:V208F:H212Y:T216S:I218N	E36V:T38S:R43C:T45S:K47T:K49R:T75M:N91T:N92K:H110Q:A119E:D125E:A150E:D161A:V165I:R210L:L214R:H215Y:S221T:N222K:V228F:H232Y:T236S:I238N	pplu					ATGCCAGCCATGAAAATCGAATGTCGCATTACGGGCACTCTGAACGGCGTGGAGTTCGAGCTCGTAGGCGGGGGCGTTGGCAGTCCGGAACAGGGCTGTATGTCGAACACAATGCGCTCCACCAAAGGCGCACTGACCTTTTCTCCGTACCTGCTCAGCCACGTTATGGGTTACGGCTTCTATCACTTCGGCATGTACCCCTCCGGTTACGAGAATCCGTTCCTCCACGCTATCACAAAAGGTGGCTACACAAATACGCGCATTGAAAAGTACGAGGACGGCGGCGTCCTTCAAGTATCATTCTCATATCGTTATGAGGAGGGTCGCGTGATCGGCGAATTCAAGGTAGTGGGCACAGGCTTCCCTGAGGACTCAGTCATCTTTACGGACAAGATCATT…	2	pplu24_top175r_5	A5	3
MPAMKIECRITGTMNGVEFELVGGGEGTPEQGRMTNKMKSTKGALTFSPYLLSHVMGYGFYHFGAYPSGYENPFHHAINNGGYTNTRIEKYEDGGVLHVSFSYRYASGRVIGDFKVVGTDFPEDSVIFTDKIIRSNATVEHFHPMGDNVLVGSFARTFSLRDGGYYSFVVDSQMLFKSAIHSSILQNDGPMFAYRRVDEIRSNTVLVIVECQHAFERPSDLG*	L13M:T64A:L74H:E105A:A106S:G119D:L141F:H172Q:H174L:P181S:G187D:F193Y:E197D:L199I:H200R:E204V:G206V:Y210C:K215E:T216R:I218S:A219D:F220L:A221G	L24M:T75A:L87H:E118A:A119S:G132D:L155F:H187Q:H189L:P196S:G202D:F208Y:E212D:L214I:H215R:E224V:G226V:Y230C:K235E:T236R:I238S:A239D:F240L:A241G	pplu					ATGCCAGCCATGAAAATCGAATGTCGCATTACGGGCACTATGAACGGCGTGGAGTTCGAGCTCGTAGGCGGGGGCGAGGGCACCCCGGAACAGGGCCGCATGACCAACAAGATGAAGTCCACCAAAGGCGCACTGACCTTTTCTCCGTACCTGCTCAGCCACGTTATGGGTTACGGCTTCTATCACTTCGGCGCCTACCCCTCCGGTTACGAGAATCCGTTCCACCACGCTATCAACAACGGTGGCTACACAAATACGCGCATTGAAAAGTACGAGGACGGCGGCGTCCTTCACGTATCATTCTCATATCGTTATGCTAGCGGTCGCGTGATCGGCGACTTCAAGGTAGTGGGCACAGACTTCCCTGAGGACTCAGTCATCTTTACGGACAAGATCATT…	2	pplu24_top175r_3	A6	2
MPAMKIECRITGTLNGVEFELVGGGVGNPEQGRMNNKMKSTKGPLTFSPYLLSHVMGYGFYHFGTYPSGYENPFFHAINNGGYTNTRNEKYEDGGVLHLSFTYRYESRRVIGDFKVVGTDFPANSVIFTDKIIRSNATVEHLHPMGNNVLVGSFARTFSLRDGGFYSYVVDSHMLFKSAIHPSILQNGGPMFAFRCVEELHRSTKLGIVEYQHAFQKPIAIA*	E25V:T27N:T34N:A43P:L74F:I87N:V98L:S101T:A106S:G107R:G119D:E122A:D123N:D146N:Y164F:F167Y:H174L:R195C:S201R:N202S:E204K:K215Q:T216K:F220I	E36V:T38N:T45N:A54P:L87F:I100N:V111L:S114T:A119S:G120R:G132D:E135A:D136N:D161N:Y179F:F182Y:H189L:R210C:S221R:N222S:E224K:K235Q:T236K:F240I	pplu					ATGCCAGCCATGAAAATCGAATGTCGCATTACGGGCACTCTGAACGGCGTGGAGTTCGAGCTCGTAGGCGGGGGCGTGGGCAACCCGGAACAGGGCCGCATGAATAACAAGATGAAGTCCACCAAAGGCCCTCTGACCTTTTCTCCGTACCTGCTCAGCCACGTTATGGGTTACGGCTTCTATCACTTCGGCACGTACCCCTCCGGTTACGAGAATCCGTTCTTTCACGCTATCAACAACGGTGGCTACACAAATACGCGCAATGAAAAGTACGAGGACGGCGGCGTCCTTCACTTGTCATTCACGTATCGTTATGAGAGCCGGCGCGTGATCGGCGACTTCAAGGTAGTGGGCACAGACTTCCCTGCAAATTCAGTCATCTTTACGGACAAGATCATT…	2	pplu24_top175r_8	A7	3
MPAMKIECRITGTLNGVEFELVGGGEGNPEQGHMTNEMKSTKGALTFSPFLLSHVMGYGFYHFGTYPSGYVNPFLHAINNGGYTNTRNEKYEDGGVLHVSFSYRYETGRVIGDFKVVGTGFPADSVIFTDKIIRSNATVEHLHPIGDNLLVGSFARTFSLRDGGYYSFVVESRMHFKSAIHPSILQNGGPMFVFRSVEEPHSNTELWIAEHQHAFMKPMTIS*	T27N:R32H:K36E:Y49F:E70V:I87N:A106T:E122A:M144I:V148L:D170E:H172R:A192V:R195S:L199P:G206W:V208A:Y210H:K215M:T216K:I218M:A219T:F220I:A221S	T38N:R43H:K47E:Y60F:E81V:I100N:A119T:E135A:M158I:V163L:D185E:H187R:A207V:R210S:L214P:G226W:V228A:Y230H:K235M:T236K:I238M:A239T:F240I:A241S	pplu					ATGCCAGCCATGAAAATCGAATGTCGCATTACGGGCACTCTGAACGGCGTGGAGTTCGAGCTCGTAGGCGGGGGCGAGGGCAATCCGGAACAGGGCCATATGACCAACGAGATGAAGTCCACCAAAGGCGCACTGACCTTTTCTCCGTTCCTGCTCAGCCACGTTATGGGTTACGGCTTCTATCACTTCGGCACGTACCCCTCCGGTTACGTGAATCCGTTCCTCCACGCTATCAACAACGGTGGCTACACAAATACGCGCAACGAAAAGTACGAGGACGGCGGCGTCCTTCACGTATCATTCTCATATCGTTATGAGACTGGTCGCGTGATCGGCGACTTCAAGGTAGTGGGCACAGGCTTCCCTGCGGACTCAGTCATCTTTACGGACAAGATCATT…	2	pplu24_top175r_6	A8	77
MPAMKIVCRITGTMNGVEFELVGGGEGTPERGRMNNKMRSTKGALTFSPYLLSHVMGYGFYLFGTYPSDYENPFLHAINNGGYTNTRIEKYEDGGVLHVSFSYRYEEGRVIGDFKVVGTGFPEDSVIFTDKIIRSNATVEHLHPVGDNLLVGSFARTFSLRDGGYYSFLVDSLMHFKSAIHPSILQNGGPMFAFRRVEEHQSNTVLWIFECQRAFTSPNDSA*	E6V:L13M:Q30R:T34N:K38R:H61L:G68D:A106E:M144V:V148L:V168L:H172L:L199H:H200Q:E204V:G206W:V208F:Y210C:H212R:K215T:T216S:I218N:A219D:F220S	E17V:L24M:Q41R:T45N:K49R:H72L:G79D:A119E:M158V:V163L:V183L:H187L:L214H:H215Q:E224V:G226W:V228F:Y230C:H232R:K235T:T236S:I238N:A239D:F240S	pplu					ATGCCAGCCATGAAAATCGTGTGTCGCATTACGGGCACTATGAACGGCGTGGAGTTCGAGCTCGTAGGCGGGGGCGAGGGCACCCCGGAACGTGGCCGCATGAATAACAAGATGCGCTCCACCAAAGGCGCACTGACCTTTTCTCCGTACCTGCTCAGCCACGTTATGGGTTACGGCTTCTATCTGTTCGGCACGTACCCCTCCGATTACGAGAATCCGTTCCTCCACGCTATCAACAACGGTGGCTACACAAATACGCGCATTGAAAAGTACGAGGACGGCGGCGTCCTTCACGTATCATTCTCATATCGTTATGAGGAAGGTCGCGTGATCGGCGACTTCAAGGTAGTGGGCACAGGCTTCCCTGAGGACTCAGTCATCTTTACGGACAAGATCATT…	2	pplu24_top175r_7	A9	3
MPAMKIECRITGTLNGVEFELVGGGEGTPEQGRMTNKMKSTKGALTFSPYLLSHVMGYGFYHFGAYPSGYENPFLHAINKGGYRNTRIERYEDGGVLNISFSYRYKAGRVIGDFKVVGTGFPEDSVIFTDKIIRSNASVEHLHPVGETVLVGSFARTFSLRDGGYYSFVVESNMQFKGAIHPSILQNGGPMFAFRLVEEVHSKTELEILEYQQAFMRPIAVA*	T64A:N79K:T83R:K89R:H97N:V98I:E105K:T137S:M144V:D146E:N147T:D170E:H172N:H174Q:S177G:R195L:L199V:N202K:G206E:V208L:H212Q:K215M:T216R:F220V	T75A:N92K:T96R:K102R:H110N:V111I:E118K:T151S:M158V:D161E:N162T:D185E:H187N:H189Q:S192G:R210L:L214V:N222K:G226E:V228L:H232Q:K235M:T236R:F240V	pplu					ATGCCAGCCATGAAAATCGAATGTCGCATTACGGGCACTCTGAACGGCGTGGAGTTCGAGCTCGTAGGCGGGGGCGAGGGCACCCCGGAACAGGGCCGCATGACCAACAAGATGAAGTCCACCAAAGGCGCACTGACCTTTTCTCCGTACCTGCTCAGCCACGTTATGGGTTACGGCTTCTATCACTTCGGCGCCTACCCCTCCGGTTACGAGAATCCGTTCCTCCACGCTATCAACAAAGGTGGCTACCGCAATACGCGCATTGAACGGTACGAGGACGGCGGCGTCCTTAATATCTCATTCTCATATCGTTATAAGGCGGGTCGCGTGATCGGCGACTTCAAGGTAGTGGGCACAGGCTTCCCTGAGGACTCAGTCATCTTTACGGACAAGATCATT…	2	pplu24_top175r_9	A10	102
MPAMKIECRISGTLNGVEFELVGGGEGTPEQGLMANKVKSTKGALTFSPFLLSHVMGYGFYHFGMYPSGYENPFLHSINNGGYTNTRIEKYEDGGVLQVSFSYRYETGRVIGDFKVVGTGFPEDSVIFTDKIIRSNATVEHLHPIGDNVLVGSFARTFSLRDGGYYSFVVDSHMHFKSAIHSSILQDGGPMFVFRHVDEPHTNTELAIDEHQHAFETPFTFE*	T10S:R32L:T34A:M37V:Y49F:T64M:A76S:H97Q:A106T:M144I:P181S:N186D:A192V:R195H:E197D:L199P:S201T:G206A:V208D:Y210H:K215E:I218F:A219T:A221E	T21S:R43L:T45A:M48V:Y60F:T75M:A89S:H110Q:A119T:M158I:P196S:N201D:A207V:R210H:E212D:L214P:S221T:G226A:V228D:Y230H:K235E:I238F:A239T:A241E	pplu					ATGCCAGCCATGAAAATCGAATGTCGCATTAGCGGCACTCTGAACGGCGTGGAGTTCGAGCTCGTAGGCGGGGGCGAGGGCACCCCGGAACAGGGCTTAATGGCGAACAAGGTCAAGTCCACCAAAGGCGCACTGACCTTTTCTCCGTTTCTGCTCAGCCACGTTATGGGTTACGGCTTCTATCACTTCGGCATGTACCCCTCCGGTTACGAGAATCCGTTCCTCCACTCGATCAACAACGGTGGCTACACAAATACGCGCATTGAAAAGTACGAGGACGGCGGCGTCCTTCAAGTATCATTCTCATATCGTTATGAGACAGGTCGCGTGATCGGCGACTTCAAGGTAGTGGGCACAGGCTTCCCTGAGGACTCAGTCATCTTTACGGACAAGATCATT…	2	pplu24_top175r_10	A11	3
MPAMKIECRITGTLNGVEFELVGGGKGTPEQGCMSNNMKSTKGALTFSPYLLSHVMGYGFYHFGTYPSDYENPFLHAINNGGYTNTRIEKYEDGGVLHVSFSYRYEAGRVIGDFKVVGTGFPEDSVIFTDKIIRSNASVEHLHPMGDNVLVGSFARTFSLRDGGYYSCVVDSQMDFKSAIHPSILQNDGPMFAFRSVDEHYTNTKLEIVEFQDAFERAIDFE*	G206E:L199H:A221E:Y210F:R32C:K36N:A219D:K215E:R195S:T34S:E25K:E197D:F167C:H212D:G68D:H172Q:H200Y:E204K:T137S:T216R:G187D:P217A:S201T:H174D	G226E:L214H:A241E:Y230F:R43C:K47N:A239D:K235E:R210S:T45S:E36K:E212D:F182C:H232D:G79D:H187Q:H215Y:E224K:T151S:T236R:G202D:P237A:S221T:H189D	pplu					ATGCCAGCCATGAAAATCGAATGTCGCATTACGGGCACTCTGAACGGCGTGGAGTTCGAGCTCGTAGGCGGGGGCAAAGGCACCCCGGAACAGGGCTGCATGTCTAACAACATGAAGTCCACCAAAGGCGCACTGACCTTTTCTCCGTACCTGCTCAGCCACGTTATGGGTTACGGCTTCTATCACTTCGGCACGTACCCCTCCGACTACGAGAATCCGTTCCTCCACGCTATCAACAACGGTGGCTACACAAATACGCGCATTGAAAAGTACGAGGACGGCGGCGTCCTTCACGTATCATTCTCATATCGTTATGAGGCGGGTCGCGTGATCGGCGACTTCAAGGTAGTGGGCACAGGCTTCCCTGAGGACTCAGTCATCTTTACGGACAAGATCATT…	2	pplu24_top24	A12	2
MTALTEGAKLFEKEIPYITELEGDVEGMKFIIKGVGTGDATTGTIKAKYICTTGDLPVPWATILSSLSYGVFCFAKYPRHIADFFKSTQPEGYSQDRVISFDNDGQYDVRAKVTYENGTLYNRVTVKGTGFKSNGNILGMRVSYHSPPHAVYILPDRKNGGMRIEYNKAFDVMGGGHQMARHAQFNKPLGAWEEDYPLYHHLTVWTSFGKDPDDDETDHLTIVEVIKAVDLETYR*	E34V:D90E:I97V:K109R:L142S:K162R	E34V:D93E:I100V:K112R:L145S:K165R	cgre	6	1	4.6609797	4.578887	ATGACTGCACTTACCGAAGGCGCGAAGCTGTTCGAAAAAGAGATTCCCTATATCACCGAGCTGGAGGGCGACGTAGAGGGCATGAAGTTCATCATTAAGGGCGTGGGCACTGGCGATGCCACCACGGGCACCATCAAGGCGAAGTACATCTGCACCACCGGCGACCTGCCCGTGCCCTGGGCTACCATCCTGTCATCCCTGTCGTACGGCGTGTTTTGCTTCGCTAAATACCCCCGCCACATTGCGGACTTCTTCAAGTCCACCCAACCCGAAGGCTACAGTCAGGACCGCGTCATCTCGTTCGACAATGACGGCCAGTACGACGTGCGGGCCAAAGTGACGTATGAGAACGGTACACTATACAACCGCGTTACCGTGAAGGGCACTGGTTTCAAGTCA…	2	cgre6_318	B1	246
MTTLTEGAKLFEKEIPYITELEGDVEGMRFIIKGEGTGDATTGTIKAKYICTTGDLPVPWATILSSLSYGVFCFAKYPRHIADFFKSTQPDGYSQDRIISFDNDGQYDVKAKVTYENGTLYNRVTVKGTGFKSNGNILGMRVMYRSPPHAVYVLPDRKNGGLKIEYNKAFDVMGGGHQMARHAQFNKPLGAWEEDYPLYHHLTVWTSFGKDPDDDETDHLTIVEVIKAVDLETYR*	A2T:K28R:L142M:H144R:I152V:M161L	A2T:K28R:L145M:H147R:I155V:M164L	cgre	6	2	4.836179	4.5226035	ATGACTACACTTACCGAAGGCGCGAAGCTGTTCGAAAAAGAGATTCCCTATATCACCGAGCTGGAGGGCGACGTAGAGGGCATGCGCTTCATCATTAAGGGCGAGGGCACTGGCGATGCCACCACGGGCACCATCAAGGCGAAGTACATCTGCACCACCGGCGACCTGCCCGTGCCCTGGGCTACCATCCTGTCATCCCTGTCGTACGGCGTGTTTTGCTTCGCTAAATACCCCCGCCACATTGCGGACTTCTTCAAGTCCACCCAACCCGATGGCTACAGTCAGGACCGCATCATCTCGTTCGACAATGACGGCCAGTACGACGTGAAAGCCAAAGTGACGTATGAGAACGGTACACTATACAACCGCGTTACCGTGAAGGGCACTGGTTTCAAGTCA…	2	cgre6_1137	B2	244
MTAPTEGAKLFEKEIPYVTELEGDVEGMKFIIKGEGTGDAATGTIKAKYICTTGDLPVPWATILSSLSYGVFCFAQYPRHIADFFKSTQPDGYSQDRIISFDNDGQYDVKAKVTYENGTLYNRVTVKGTGFKSNGNILGMRVLYHSPPHAVYILPDRKNGGMKIEYNKAFEVMGGGHQMARHAQFNKPLGAWEEDYPLYHHLTVWTSFGKDPDDGETDHLTIVEVIKAVDLETYR*	L3P:I17V:T40A:K75Q:D170E:D214G	L3P:I17V:T40A:K75Q:D173E:D220G	cgre	6	4	4.7087603	4.5494666	ATGACTGCACCAACCGAAGGCGCGAAGCTGTTCGAAAAAGAGATTCCCTATGTGACCGAGCTGGAGGGCGACGTAGAGGGCATGAAGTTCATCATTAAGGGCGAGGGCACTGGCGATGCCGCGACGGGCACCATCAAGGCGAAGTACATCTGCACCACCGGCGACCTGCCCGTGCCCTGGGCTACCATCCTGTCATCCCTGTCGTACGGCGTGTTTTGCTTCGCTCAGTACCCCCGCCACATTGCGGACTTCTTCAAGTCCACCCAACCCGATGGCTACAGTCAGGACCGCATCATCTCGTTCGACAATGACGGCCAGTACGACGTGAAAGCCAAAGTGACGTATGAGAACGGTACACTATACAACCGCGTTACCGTGAAGGGCACTGGTTTCAAGTCA…	2	cgre6_1338	B3	238
MTALTVGAKLFEKEIPYVTELEGDVEGMKFIIKGEGTGDATTGTIKAKYICTTGDLPVPWATILSSLSYGVFCFAKYPRHIADFFKSTQPDGYSQDRIISFDNDGQYDVKAKVTYENGKLYNRVNVKGTGFKSNGNILGMRVLYHSPAHAVYILPDRKNGGMKIEYNMAFDVMGGGHQMARHAQFNKPLGAWEEDYPLYHHLTVWTSFGKDPDDDETDHLTIVEVIKAVDLETYR*	E5V:I17V:T118K:T124N:P147A:K167M	E5V:I17V:T121K:T127N:P150A:K170M	cgre	6	0	4.9585247	4.705806	ATGACTGCACTTACCGTAGGCGCGAAGCTGTTCGAAAAAGAGATTCCCTATGTCACCGAGCTGGAGGGCGACGTAGAGGGCATGAAGTTCATCATTAAGGGCGAGGGCACTGGCGATGCCACCACGGGCACCATCAAGGCGAAGTACATCTGCACCACCGGCGACCTGCCCGTGCCCTGGGCTACCATCCTGTCATCCCTGTCGTACGGCGTGTTTTGCTTCGCTAAATACCCCCGCCACATTGCGGACTTCTTCAAGTCCACCCAACCCGATGGCTACAGTCAGGACCGCATCATCTCGTTCGACAATGACGGCCAGTACGACGTGAAAGCCAAAGTGACGTATGAGAACGGTAAACTATACAACCGCGTTAATGTGAAGGGCACTGGTTTCAAGTCA…	2	cgre6_615	B4	245
MTALTEGAKLFEEEIPYITELEGDVEGMKFIIRGEGTGDATTGTIKAKYICTTGDLPVPWATILSSLSYGVFCFAKYPRHIADFFKSTQPDGYSQDRIISFDNDGQFDVKAKVTYENGTLYNRVTVKGTGFKSNGNILGMRVMYHSPPHAVYVLPDRKNGGMKIEYNKAFDVMGGGHQMARHAQFNKPLGAWEEDYPLYHHLTVWTSFGKDPDDNETDHLTIVEVIKAVDLETYR*	K12E:K32R:Y106F:L142M:I152V:D214N	K12E:K32R:Y109F:L145M:I155V:D220N	cgre	6	2	4.7777534	4.572324	ATGACTGCACTTACCGAAGGCGCGAAGCTGTTCGAAGAAGAGATTCCCTATATCACCGAGCTGGAGGGCGACGTAGAGGGCATGAAGTTCATCATTCGGGGCGAGGGCACTGGCGATGCCACCACGGGCACCATCAAGGCGAAGTACATCTGCACCACCGGCGACCTGCCCGTGCCCTGGGCTACCATCCTGTCATCCCTGTCGTACGGCGTGTTTTGCTTCGCTAAATACCCCCGCCACATTGCGGACTTCTTCAAGTCCACCCAACCCGATGGCTACAGTCAGGACCGCATCATCTCGTTCGACAATGACGGCCAGTTCGACGTGAAAGCCAAAGTGACGTATGAGAACGGTACACTATACAACCGCGTTACCGTGAAGGGCACTGGTTTCAAGTCA…	2	cgre6_1115	B5	245
MTALTEGAKLFEKEIPYITELEGDVEGMKFIVKGEGTGDATTGTIKAKYVCTTGELPVPWATILSSLSYGVFCFAKYPRHIADFFKSTQPDGYSQDRIISFDNDGQYDVKAKVTYENGTVYNRVTVKGTGFNSNGNILGMRVLYHSPPHAVYILPDRKNGGMKIEYNKAFDVMGGGHQMARHAQFNKPLGAWEEDYPLYHHLTVWTSFGKDPDDDDTDHLTIVEVIKAVDLETYR*	I31V:I49V:D54E:L119V:K131N:E215D	I31V:I49V:D54E:L122V:K134N:E221D	cgre	6	2	4.8272233	4.5783863	ATGACTGCACTTACCGAAGGCGCGAAGCTGTTCGAAAAAGAGATTCCCTATATCACCGAGCTGGAGGGCGACGTAGAGGGCATGAAGTTCATCGTGAAGGGCGAGGGCACTGGCGATGCCACCACGGGCACCATCAAGGCGAAGTACGTTTGCACCACCGGCGAACTGCCCGTGCCCTGGGCTACCATCCTGTCATCCCTGTCGTACGGCGTGTTTTGCTTCGCTAAATACCCCCGCCACATTGCGGACTTCTTCAAGTCCACCCAACCCGATGGCTACAGTCAGGACCGCATCATCTCGTTCGACAATGACGGCCAGTACGACGTGAAAGCCAAAGTGACGTATGAGAACGGTACAGTGTACAACCGCGTTACCGTGAAGGGCACTGGTTTCAACTCA…	2	cgre6_1033	B6	245
MTALTKGAKLFEKEIPYITELEGDVEGMKFIIKGEGTGDATTGTIKAKYICTTGDLPVPWATILSSLSYGVFCFAKYPPHIADFFKSTQPDGYTQDRIISFDNDGQYDVKAKVTYENGRLYNRVTVKGTGFKSNGNILGMRVLYHSPPHAVYILPDRKNGGMKIEYNKAFDVMGGGHQMARHAQFNKPLGAWEEEYPLYHHLTVWTSFGKDPDDDDTDHLTIVEVIKAVDLETYR*	E5K:R78P:S93T:T118R:D194E:E215D	E5K:R78P:S96T:T121R:D197E:E221D	cgre	6	2	4.8192086	4.605464	ATGACTGCACTTACCAAGGGCGCGAAGCTGTTCGAAAAAGAGATTCCCTATATCACCGAGCTGGAGGGCGACGTAGAGGGCATGAAGTTCATCATTAAGGGCGAGGGCACTGGCGATGCCACCACGGGCACCATCAAGGCGAAGTACATCTGCACCACCGGCGACCTGCCCGTGCCCTGGGCTACCATCCTGTCATCCCTGTCGTACGGCGTGTTTTGCTTCGCTAAATACCCCCCCCACATTGCGGACTTCTTCAAGTCCACCCAACCCGATGGCTACACTCAGGACCGCATCATCTCGTTCGACAATGACGGCCAGTACGACGTGAAAGCCAAAGTGACGTATGAGAACGGTCGCCTATACAACCGCGTTACCGTGAAGGGCACTGGTTTCAAGTCA…	2	cgre6_1213	B7	252
MTALTEGAKLFEKEIPYITELEGDVEGMKFFIKGEGTGDATTGTIKAKYICTTGDLPVPWATILSSLSYGVFCFAKYPRHIADFFKSTQPDGYSQDRIITFDNDGQYNVKAKVTYENGTLYNRVTVKGTGFKSNGNILGMRVLYHSPPHAVYILPDRKNGGMKIEYNKAFDVLGGGHQMARHAQFNKPLGAWEEDYPQYHHLTVWTSFGKDPDDAETDHLTIVEVIKAVDLETYR*	I30F:S99T:D107N:M172L:L197Q:D214A	I30F:S102T:D110N:M175L:L203Q:D220A	cgre	6	3	4.8272095	4.631257	ATGACTGCACTTACCGAAGGCGCGAAGCTGTTCGAAAAAGAGATTCCCTATATCACCGAGCTGGAGGGCGACGTAGAGGGCATGAAGTTCTTCATTAAGGGCGAGGGCACTGGCGATGCCACCACGGGCACCATCAAGGCGAAGTACATCTGCACCACCGGCGACCTGCCCGTGCCCTGGGCTACCATCCTGTCATCCCTGTCGTACGGCGTGTTTTGCTTCGCTAAATACCCCCGCCACATTGCGGACTTCTTCAAGTCCACCCAACCCGATGGCTACAGTCAGGACCGCATCATCACATTCGACAATGACGGCCAGTACAATGTGAAAGCCAAAGTGACGTATGAGAACGGTACACTATACAACCGCGTTACCGTGAAGGGCACTGGTTTCAAGTCA…	2	cgre6_104	B8	247
MTTLTEGAKLFEKEIPYVTELEGDVEGMKFIIKGEGTGDATTGTIKAKYICTTGDLPVPWATILSSLSYGVFCFAKYPRHIADFFKSTQPDGYSQDRIISFDNDGQYNVKAKVTYENGTLYNRVTVKGTGFKSNGNILGMRVLYHSPPHVVYILPDRKNGGMKIEYNKVFDVMGGGHQMARHAQFNKPLGAWEEDYPVYHHLTVWTSFGKDPDDDETDHLTIVEVIKAVDLETYR*	A2T:I17V:D107N:A149V:A168V:L197V	A2T:I17V:D110N:A152V:A171V:L203V	cgre	6	2	4.928363	4.7029753	ATGACTACCCTTACCGAAGGCGCGAAGCTGTTCGAAAAAGAGATTCCCTATGTAACCGAGCTGGAGGGCGACGTAGAGGGCATGAAGTTCATCATTAAGGGCGAGGGCACTGGCGATGCCACCACGGGCACCATCAAGGCGAAGTACATCTGCACCACCGGCGACCTGCCCGTGCCCTGGGCTACCATCCTGTCATCCCTGTCGTACGGCGTGTTTTGCTTCGCTAAATACCCCCGCCACATTGCGGACTTCTTCAAGTCCACCCAACCCGATGGCTACAGTCAGGACCGCATCATCTCGTTCGACAATGACGGCCAGTACAACGTGAAAGCCAAAGTGACGTATGAGAACGGTACACTATACAACCGCGTTACCGTGAAGGGCACTGGTTTCAAGTCA…	2	cgre6_808	B9	246
MTAPTEGAKLFEKEIPYITELEGDVEGMKFFIKGEGTGDATTGTIKAKYICTTGDLPVPWATILSSLSYGVFCFAKYPRHIADFFKSTQPDGYSQDRIITFDNDGQYDVKAKVTYENGTLYNRVIVKGTGFKSNGNILGMRVLYHSPPHAVYILPDRKNGGMKIEYNKAFDVMGGGHQMARHAQLNKPLGAWEEDYPLYHHLTVWTSFGKDPDDDKTDHLTIVEVIKAVDLETYR*	L3P:I30F:S99T:T124I:F184L:E215K	L3P:I30F:S102T:T127I:F187L:E221K	cgre	6	3	4.7440615	4.5087004	ATGACTGCACCAACCGAAGGCGCGAAGCTGTTCGAAAAAGAGATTCCCTATATCACCGAGCTGGAGGGCGACGTAGAGGGCATGAAGTTCTTCATTAAGGGCGAGGGCACTGGCGATGCCACCACGGGCACCATCAAGGCGAAGTACATCTGCACCACCGGCGACCTGCCCGTGCCCTGGGCTACCATCCTGTCATCCCTGTCGTACGGCGTGTTTTGCTTCGCTAAATACCCCCGCCACATTGCGGACTTCTTCAAGTCCACCCAACCCGATGGCTACAGTCAGGACCGCATCATCACGTTCGACAATGACGGCCAGTACGACGTGAAAGCCAAAGTGACGTATGAGAACGGTACACTATACAACCGCGTTATTGTGAAGGGCACTGGTTTCAAGTCA…	2	cgre6_168	B10	240
MTALTEGAKLFEKEIPYITELEGEVEGMKFIIKGEGTGDATTGTIKAKYICTTGELPVPWATILSSLSYGVFCFAKYPRHISDFFKSTQPDGYSQDRIISFDNDGQYDVKAKVTYENGTLYNRVNVKGTGFKSNGNILGMRVLYHSPPHAVYILPDRKNGGMKIEYNKAFDLMGGGHQMARHAQFNKPLGAWEEDYPQYHHLTVWTSFGKDPDDDETDHLTIVEVIKAVDLETYR*	D23E:D54E:A81S:T124N:V171L:L197Q	D23E:D54E:A81S:T127N:V174L:L203Q	cgre	6	1	5.019053	4.6101813	ATGACTGCACTTACCGAAGGCGCGAAGCTGTTCGAAAAAGAGATTCCCTATATCACCGAGCTGGAGGGCGAAGTAGAGGGCATGAAGTTCATCATTAAGGGCGAGGGCACTGGCGATGCCACCACGGGCACCATCAAGGCGAAGTACATCTGCACCACCGGCGAGCTGCCCGTGCCCTGGGCTACCATCCTGTCATCCCTGTCGTACGGCGTGTTTTGCTTCGCTAAATACCCCCGCCACATTTCGGACTTCTTCAAGTCCACCCAACCCGATGGCTACAGTCAGGACCGCATCATCTCGTTCGACAATGACGGCCAGTACGACGTGAAAGCCAAAGTGACGTATGAGAACGGTACACTATACAACCGCGTTAACGTGAAGGGCACTGGTTTCAAGTCA…	2	cgre6_931	B11	225
MTALTKGAKLFEKEIPYITELEGDVEGMKFIIKGEGTGDATTGTIKAKYICTTGDLPVPWATILSSLSYGVFCFAKYPRHIPDFFKSTQPDGYSQDRIISFDDDGQYDVKAKVTYENGTLYNRVTMKGTGFKSNGNILGMRVLYHSPPHAVYVLPDRKNGGMKIEYNKAFDVMGGGHQMARHAQFNKPLGAWEEDYPVYHHLTVWTSFGKDPDDDETDHLTIVEVIKAVDLETYR*	E5K:A81P:N102D:V125M:I152V:L197V	E5K:A81P:N105D:V128M:I155V:L203V	cgre	6	1	4.8926296	4.7227755	ATGACTGCACTTACCAAAGGCGCGAAGCTGTTCGAAAAAGAGATTCCCTATATCACCGAGCTGGAGGGCGACGTAGAGGGCATGAAGTTCATCATTAAGGGCGAGGGCACTGGCGATGCCACCACGGGCACCATCAAGGCGAAGTACATCTGCACCACCGGCGACCTGCCCGTGCCCTGGGCTACCATCCTGTCATCCCTGTCGTACGGCGTGTTTTGCTTCGCTAAATACCCCCGCCACATTCCCGACTTCTTCAAGTCCACCCAACCCGATGGCTACAGTCAGGACCGCATCATCTCGTTCGACGACGACGGCCAGTACGACGTGAAAGCCAAAGTGACGTATGAGAACGGTACACTATACAACCGCGTTACCATGAAGGGCACTGGTTTCAAGTCA…	2	cgre6_506	B12	243
MTALPEGAKLFEKEIPYITELEGDVEGMKFIIKGVGTGDATTGTIKAKYICTTGDLPVPWATILSSLSYGVFCFAKYPRHIPDFFKATQPDGYSQDRIISFDNDGEYEVKAKVTYEKGTLYNRVTVKGTGFKSKGNILGMRVLYHSPPHAVYILPDRKNGGMKIEYNKAFDLMGGGHQMARHTQFNKPLGAWEEDYPQYHHLTVWTSFGKDPDDDETDHLTIIEVIKAVDLETYR*	T4P:E34V:A81P:S86A:Q105E:D107E:N116K:N133K:V171L:A182T:L197Q:V222I	T4P:E34V:A81P:S88A:Q108E:D110E:N119K:N136K:V174L:A185T:L203Q:V228I	cgre	12	3	5.2094855	4.7414303	ATGACTGCACTTCCGGAAGGCGCGAAGCTGTTCGAAAAAGAGATTCCCTATATCACCGAGCTGGAGGGCGACGTAGAGGGCATGAAGTTCATCATTAAGGGCGTAGGCACTGGCGATGCCACCACGGGCACCATCAAGGCGAAGTACATCTGCACCACCGGCGACCTGCCCGTGCCCTGGGCTACCATCCTGTCATCCCTGTCGTACGGCGTGTTTTGCTTCGCTAAATACCCCCGCCACATTCCGGACTTCTTCAAGGCAACCCAACCCGATGGCTACAGTCAGGACCGCATCATCTCGTTCGACAATGACGGCGAGTACGAAGTGAAAGCCAAAGTGACGTATGAGAAAGGTACACTATACAACCGCGTTACCGTGAAGGGCACTGGTTTCAAGTCA…	2	cgre12_2153	C1	238
MTALTEGAKLFEKEIPYVTELEGDVEGMKFIIKGEGTGDATTGTIKAKYICTTGDLPVPWATILSSLSYGVFCFAKYPRHIPDFFKSTQPDGYSQDRIISFDDDGQYDVKAKVTYENGTLYNRVTVKGTGFKSNGHILGKRVLHHSPPHSVYILPDRKNGGMRIEYNKAFDVLGGGHQMARHSQFNRPLGAWEEDYPLYHHLTVWTSFGKDPDDDDTDHLTIVEVIKAVDLETYR*	I17V:A81P:N102D:N135H:M139K:Y143H:A149S:K162R:M172L:A182S:K186R:E215D	I17V:A81P:N105D:N138H:M142K:Y146H:A152S:K165R:M175L:A185S:K189R:E221D	cgre	12	3	5.346913	4.8453856	ATGACTGCACTTACCGAAGGCGCGAAGCTGTTCGAAAAAGAGATTCCCTATGTGACCGAGCTGGAGGGCGACGTAGAGGGCATGAAGTTCATCATTAAGGGCGAGGGCACTGGCGATGCCACCACGGGCACCATCAAGGCGAAGTACATCTGCACCACCGGCGACCTGCCCGTGCCCTGGGCTACCATCCTGTCATCCCTGTCGTACGGCGTGTTTTGCTTCGCTAAATACCCCCGCCACATTCCGGACTTCTTCAAGTCCACCCAACCCGATGGCTACAGTCAGGACCGCATCATCTCGTTCGACGACGACGGCCAGTACGACGTGAAAGCCAAAGTGACGTATGAGAACGGTACACTATACAACCGCGTTACCGTGAAGGGCACTGGTTTCAAGTCA…	2	cgre12_10301	C2	236
MTTLPEGAKLFDKEIPYITELEGDVEGMKFIIKGVGTGDATTGTIKAKYICTTGDLPVPWATILSSLSYGVFCFAKYPRHIADFFKSTQPDGYSQDRTISFDNDGQYDVKAKVTYEDGTLYNRVTVKGTGFKSNGNILGMRVLYHSPPHAVYVLPDRKNGGLKIEYNKAFDVLGGGHQMARHAQFNKPLGVWVEDYPPYHHLTVWTSFGKDPDDDETDHLTIVEVIKAVDLETYR*	A2T:T4P:E11D:E34V:I97T:N116D:I152V:M161L:M172L:A190V:E192V:L197P	A2T:T4P:E11D:E34V:I100T:N119D:I155V:M164L:M175L:A193V:E195V:L203P	cgre	12	5	5.2497654	4.9405003	ATGACTACCCTTCCTGAAGGCGCGAAGCTGTTCGACAAAGAGATTCCCTATATCACCGAGCTGGAGGGCGACGTAGAGGGCATGAAGTTCATCATTAAGGGCGTAGGCACTGGCGATGCCACCACGGGCACCATCAAGGCGAAGTACATCTGCACCACCGGCGACCTGCCCGTGCCCTGGGCTACCATCCTGTCATCCCTGTCGTACGGCGTGTTTTGCTTCGCTAAATACCCCCGCCACATTGCGGACTTCTTCAAGTCCACCCAACCCGATGGCTACAGTCAGGACCGCACGATCTCGTTCGACAATGACGGCCAGTACGACGTGAAAGCCAAAGTGACGTATGAGGATGGTACACTATACAACCGCGTTACCGTGAAGGGCACTGGTTTCAAGTCA…	2	cgre12_9708	C3	238
MTALTEGAKLFEKEIPYITELEGDVEGMKFIIKGEGTGDATTGTIKAKYICTTGDMPVPWATILSSLSYGVFCFAKYPPHIADFFKSTQPDGYSQDRIISFDNDGQYDVKAKVTYENGKLYNRVTVKGTGFNSNGNILGMRVLYHSPPHAVYILPDRKNGGMKIEYNKVFEVKGGDHQMARHAQFNKPLGAWVEDYPLYHHLTVWTNCGKDPDDDETDHLTIVEVIKAIDLETYR*	L55M:R78P:T118K:K131N:A168V:D170E:M172K:G175D:E192V:S206N:F207C:V228I	L55M:R78P:T121K:K134N:A171V:D173E:M175K:G178D:E195V:S212N:F213C:V234I	cgre	12	4	5.0481057	4.7996025	ATGACTGCACTTACCGAAGGCGCGAAGCTGTTCGAAAAAGAGATTCCCTATATCACCGAGCTGGAGGGCGACGTAGAGGGCATGAAGTTCATCATTAAGGGCGAGGGCACTGGCGATGCCACCACGGGCACCATCAAGGCGAAGTACATCTGCACCACCGGCGACATGCCCGTGCCCTGGGCTACCATCCTGTCATCCCTGTCGTACGGCGTGTTTTGCTTCGCTAAATACCCCCCTCACATTGCGGACTTCTTCAAGTCCACCCAACCCGATGGCTACAGTCAGGACCGCATCATCTCGTTCGACAATGACGGCCAGTACGACGTGAAAGCCAAAGTGACGTATGAGAACGGTAAGCTATACAACCGCGTTACCGTGAAGGGCACTGGTTTCAACTCA…	2	cgre12_7082	C4	227
MTARTGGAKLFDKEIPYITELEGDVEGMKFIIKGVGTGDATTGTIKAKYICTTGALPVPWATILSSLSYGVFCFAKYPRHIADFFKSTQPDGYSQDRIISFDDDGQYDVKAKVTYENGKLYNRVTVKGTGFKSNGNILGMRVLYHSPPHVVYVLPDRKNGGMKIEYNKAFDVMGGGHQMARHAQFNKPLGAWEEEYPVYHHLTVWTSVGKDPDDDETDHLTIVEVIKAVDLETYR*	L3R:E5G:E11D:E34V:D54A:N102D:T118K:A149V:I152V:D194E:L197V:F207V	L3R:E5G:E11D:E34V:D54A:N105D:T121K:A152V:I155V:D197E:L203V:F213V	cgre	12	3	5.3291516	4.9485617	ATGACTGCACGGACCGGGGGCGCGAAGCTGTTCGACAAAGAGATTCCCTATATCACCGAGCTGGAGGGCGACGTAGAGGGCATGAAGTTCATCATTAAGGGCGTAGGCACTGGCGATGCCACCACGGGCACCATCAAGGCGAAGTACATCTGCACCACCGGCGCCCTGCCCGTGCCCTGGGCTACCATCCTGTCATCCCTGTCGTACGGCGTGTTTTGCTTCGCTAAATACCCCCGCCACATTGCGGACTTCTTCAAGTCCACCCAACCCGATGGCTACAGTCAGGACCGCATCATCTCGTTCGACGACGACGGCCAGTACGACGTGAAAGCCAAAGTGACGTATGAGAACGGTAAACTATACAACCGCGTTACCGTGAAGGGCACTGGTTTCAAGTCA…	2	cgre12_5353	C5	224
MTSLPEGAKLFEKEIPYITELEGDVEGMKFTIKGEGTGDATTGTIKAKYTCTTGDMPVPWATILSSLSYGVFCFAKYPRHIADFFKSTQPDGYSQDRIISFDDDGQYDVKAKVTYENGTLYNRVNVKGTGFKSNGNILGMRVLYHSPPHSVYILPDRKNGGMKIEFNKAFEVMGGGHQMARHAQFNKPLGAWEEDYPLYHHLTVWTSFGKDPDDDDTDHLTIIEVIKAVDLETYR*	A2S:T4P:I30T:I49T:L55M:N102D:T124N:A149S:Y165F:D170E:E215D:V222I	A2S:T4P:I30T:I49T:L55M:N105D:T127N:A152S:Y168F:D173E:E221D:V228I	cgre	12	3	5.1210785	4.990121	ATGACTTCGCTTCCCGAAGGCGCGAAGCTGTTCGAAAAAGAGATTCCCTATATCACCGAGCTGGAGGGCGACGTAGAGGGCATGAAGTTCACAATTAAGGGCGAGGGCACTGGCGATGCCACCACGGGCACCATCAAGGCGAAGTACACGTGCACCACCGGCGACATGCCCGTGCCCTGGGCTACCATCCTGTCATCCCTGTCGTACGGCGTGTTTTGCTTCGCTAAATACCCCCGCCACATTGCGGACTTCTTCAAGTCCACCCAACCCGATGGCTACAGTCAGGACCGCATCATCTCGTTCGACGACGACGGCCAGTACGACGTGAAAGCCAAAGTGACGTATGAGAACGGTACACTATACAACCGCGTTAATGTGAAGGGCACTGGTTTCAAGTCA…	2	cgre12_9604	C6	35
MTALTEGAKLFEKEIPYITELEGDVEGMKFIIKGEGTGDATTGTIKAKYICTTGDLPVPWATILSSLSYGVFCFAKYPRHIADFFKATQPDGYSQDRIIAFDNDGQYNVKAKVTYENGKLYNRVAVKGTGFKSNGNILGMRVLYHSPPHAVYILPDRKNGGMKIEYNMVFDLMGGGHQMARHAQFNKPLGAWVDDYPVYHHLTVWTSFGKDPDDDDTDHLTIVEVIKAVDLETYR*	S86A:S99A:D107N:T118K:T124A:K167M:A168V:V171L:E192V:E193D:L197V:E215D	S88A:S102A:D110N:T121K:T127A:K170M:A171V:V174L:E195V:E196D:L203V:E221D	cgre	12	3	5.330979	4.852504	ATGACTGCACTTACCGAAGGCGCGAAGCTGTTCGAAAAAGAGATTCCCTATATCACCGAGCTGGAGGGCGACGTAGAGGGCATGAAGTTCATCATTAAGGGCGAGGGCACTGGCGATGCCACCACGGGCACCATCAAGGCGAAGTACATCTGCACCACCGGCGACCTGCCCGTGCCCTGGGCTACCATCCTGTCATCCCTGTCGTACGGCGTGTTTTGCTTCGCTAAATACCCCCGCCACATTGCGGACTTCTTCAAGGCAACCCAACCCGATGGCTACAGTCAGGACCGCATCATCGCGTTCGACAATGACGGCCAGTACAATGTGAAAGCCAAAGTGACGTATGAGAACGGTAAACTATACAACCGCGTTGCGGTGAAGGGCACTGGTTTCAAGTCA…	2	cgre12_9840	C7	240
MTELTVGAKLFEKEIPYITELEGDVEGMKFSIKGEGTGDATTGTIKAKYICTTGDLPVPWATILSSLSYGVFCFAKYPRHIADFFKSTQPDGYSQDRIISFDNDGQYDVKAKVTFENGTLYNRVTLKGTGFNSNGNILGMRVLYHSPPHSVYILPDPKNGGMKIEYNKVFEVMGGGHQMARHTQFNKPLGAWEEDYPLYHHLTVWTSVGKDPDDDETDHLTIVEVIKAVDLETYR*	A2E:E5V:I30S:Y114F:V125L:K131N:A149S:R156P:A168V:D170E:A182T:F207V	A2E:E5V:I30S:Y117F:V128L:K134N:A152S:R159P:A171V:D173E:A185T:F213V	cgre	12	2	5.504146	5.0114164	ATGACTGAACTTACCGTCGGCGCGAAGCTGTTCGAAAAAGAGATTCCCTATATCACCGAGCTGGAGGGCGACGTAGAGGGCATGAAGTTCTCGATTAAGGGCGAGGGCACTGGCGATGCCACCACGGGCACCATCAAGGCGAAGTACATCTGCACCACCGGCGACCTGCCCGTGCCCTGGGCTACCATCCTGTCATCCCTGTCGTACGGCGTGTTTTGCTTCGCTAAATACCCCCGCCACATTGCGGACTTCTTCAAGTCCACCCAACCCGATGGCTACAGTCAGGACCGCATCATCTCGTTCGACAATGACGGCCAGTACGACGTGAAAGCCAAAGTGACGTTTGAGAACGGTACACTATACAACCGCGTTACCTTAAAGGGCACTGGTTTCAATTCA…	2	cgre12_4702	C8	234
MTALTGGAKLFEKEIPYITELEGDVEGMKFIIRGEGTGDATTGTIKAKYICTTGDLPVPWATILSSLSYGVFCFAKYPLHIADFFKSTQPDGYSQDRIISFDNDGQYDVKAKVTYENGKLYNRVTMKGTGFKSNGNILGMRVSYHSPPHAVYILPDRKNGGMKIEYNMVFDVMDGGHQMARHAQFNKPLGVWEEDYPPYHHLTVWTSFGKDPDDDDTDHLTIVEVIKAVDLETYR*	E5G:K32R:R78L:T118K:V125M:L142S:K167M:A168V:G173D:A190V:L197P:E215D	E5G:K32R:R78L:T121K:V128M:L145S:K170M:A171V:G176D:A193V:L203P:E221D	cgre	12	5	5.2658587	4.899147	ATGACTGCACTTACCGGCGGCGCGAAGCTGTTCGAAAAAGAGATTCCCTATATCACCGAGCTGGAGGGCGACGTAGAGGGCATGAAGTTCATCATTCGGGGCGAGGGCACTGGCGATGCCACCACGGGCACCATCAAGGCGAAGTACATCTGCACCACCGGCGACCTGCCCGTGCCCTGGGCTACCATCCTGTCATCCCTGTCGTACGGCGTGTTTTGCTTCGCTAAATACCCCCTTCACATTGCGGACTTCTTCAAGTCCACCCAACCCGATGGCTACAGTCAGGACCGCATCATCTCGTTCGACAATGACGGCCAGTACGACGTGAAAGCCAAAGTGACGTATGAGAACGGTAAACTATACAACCGCGTTACCATGAAGGGCACTGGTTTCAAGTCA…	2	cgre12_9959	C9	206
MTELTEGAKLFEKEIPYVTELEGDVEGMKFSIKGEGTGDATTGTIKAKYICTTGDLPVPWATILSSLSYGVFCFAKYPRHIVDFFKSTQPDGYSQDRIISFDNDGQYDVKAKVTFENGTLYNRVTVKGTGFNSNGNILGMRILYHSPPHSVYILPDRKNGGMKIEYNKVFEVMGGGHQMARHTQFNKPLGAWEEEYPLYHHLTVWTSFGKDPDDDETDHLTIVEVIKAVDLETYR*	A2E:I17V:I30S:A81V:Y114F:K131N:V141I:A149S:A168V:D170E:A182T:D194E	A2E:I17V:I30S:A81V:Y117F:K134N:V144I:A152S:A171V:D173E:A185T:D197E	cgre	12	2	5.4320817	4.9640303	ATGACTGAGCTTACCGAAGGCGCGAAGCTGTTCGAAAAAGAGATTCCCTATGTCACCGAGCTGGAGGGCGACGTAGAGGGCATGAAGTTCAGCATTAAGGGCGAGGGCACTGGCGATGCCACCACGGGCACCATCAAGGCGAAGTACATCTGCACCACCGGCGACCTGCCCGTGCCCTGGGCTACCATCCTGTCATCCCTGTCGTACGGCGTGTTTTGCTTCGCTAAATACCCCCGCCACATTGTGGACTTCTTCAAGTCCACCCAACCCGATGGCTACAGTCAGGACCGCATCATCTCGTTCGACAATGACGGCCAGTACGACGTGAAAGCCAAAGTGACGTTTGAGAACGGTACACTATACAACCGCGTTACCGTGAAGGGCACTGGTTTCAACTCA…	2	cgre12_4709	C10	219
MTELPEGAKLFEKEIPYITELEGDVEGMKFIIKGEGTGDATTGTIKAKYICTTGVLPVPWATILSSLSYGVFCFAKYPPHIVDFFKSTQPDGYSQDRIISFDNDGQYDVKAKVTYENGTLYNRVNVKGTGFNSNGNILGMRVLYHSPPHVVYILPDRKNGGMKIEYNKAFDVLGGGHQMARHAQFNKPLGAWEEDYPMYHHLTVWTSFGKDPDDDDTDHLKIVEVIKAVDLETYR*	A2E:T4P:D54V:R78P:A81V:T124N:K131N:A149V:M172L:L197M:E215D:T220K	A2E:T4P:D54V:R78P:A81V:T127N:K134N:A152V:M175L:L203M:E221D:T226K	cgre	12	8	5.467677	5.2166443	ATGACTGAACTTCCTGAAGGCGCGAAGCTGTTCGAAAAAGAGATTCCCTATATCACCGAGCTGGAGGGCGACGTAGAGGGCATGAAGTTCATCATTAAGGGCGAGGGCACTGGCGATGCCACCACGGGCACCATCAAGGCGAAGTACATCTGCACCACCGGCGTTCTGCCCGTGCCCTGGGCTACCATCCTGTCATCCCTGTCGTACGGCGTGTTTTGCTTCGCTAAATACCCCCCCCACATTGTGGACTTCTTCAAGTCCACCCAACCCGATGGCTACAGTCAGGACCGCATCATCTCGTTCGACAATGACGGCCAGTACGACGTGAAAGCCAAAGTGACGTATGAGAACGGTACACTATACAACCGCGTTAACGTGAAGGGCACTGGTTTCAATTCA…	2	cgre12_4111	C11	184
MTALPGGAKLFEKEIPYITELEGDVEGMKFIIKGEGTGDATTGTIKAKYICTTGDLPVPWASILSSLSYGVFCFAKYPRHIADFFKSTQPDGYSQDRIISFDNDGQYDVKAKVTYENGKLYNRVTVKGTGFKSNGNILGMRVSYHSPPHVVYILPDRKNGGMKIEYNMVFDVMGGGHQMARHAQFNKPLGVWEEDYPPYHHLTVWTSFGKDPDDADTDHLTIVEVIKAVDLETYR*	T4P:E5G:T61S:T118K:L142S:A149V:K167M:A168V:A190V:L197P:D214A:E215D	T4P:E5G:T61S:T121K:L145S:A152V:K170M:A171V:A193V:L203P:D220A:E221D	cgre	12	5	5.3937364	4.9493017	ATGACTGCACTTCCGGGTGGCGCGAAGCTGTTCGAAAAAGAGATTCCCTATATCACCGAGCTGGAGGGCGACGTAGAGGGCATGAAGTTCATCATTAAGGGCGAGGGCACTGGCGATGCCACCACGGGCACCATCAAGGCGAAGTACATCTGCACCACCGGCGACCTGCCCGTGCCCTGGGCTTCGATCCTGTCATCCCTGTCGTACGGCGTGTTTTGCTTCGCTAAATACCCCCGCCACATTGCGGACTTCTTCAAGTCCACCCAACCCGATGGCTACAGTCAGGACCGCATCATCTCGTTCGACAATGACGGCCAGTACGACGTGAAAGCCAAAGTGACGTATGAGAACGGTAAGCTATACAACCGCGTTACCGTGAAGGGCACTGGTTTCAAGTCA…	2	cgre12_9924	C12	202
MRKGEVLFTGIVPVLIELDGDVHGHKFSVRGEGEGDADYGKLEIKCICTTGKLPVPWPTLVTTMSYGILCFARYPEHLKMNDFFKSAMPAGYVQERTIIFQNDGKYKTRGAVKFEGDTLVNRIELKGMDFKEDGNILGHKLEYHFNSHIVYIRPDKPNNGLKGNFKVRHNIVGGGVQFANHNQTNFPLGDGPVLIPINHYLSSQTAISEVRNETREHMVFLEVFSACGLNHGKDELYN*	S1R:E5V:F45C:L63M:M77L:E89A:I92V:F98I:D101N:E110A:N143H:N148I:M152R:A156P:V162G:I166V:E171V:L177F:D179N:Y181N:V185F:C202S:K208E:D209V:D215E:F222V:H228L:T229N:M232K:K237N	S1R:E8V:F48C:L66M:M80L:E93A:I96V:F102I:D105N:E114A:N147H:N152I:M156R:A160P:V166G:I170V:E175V:L181F:D183N:Y185N:V189F:C209S:K215E:D216V:D223E:F230V:H236L:T237N:M240K:K245N	amac	30	9	4.4320383	4.5396566	ATGCGCAAGGGCGAGGTACTGTTCACCGGGATCGTGCCCGTCCTGATTGAGCTGGACGGCGACGTACACGGCCACAAGTTCAGCGTGCGCGGCGAGGGCGAGGGCGATGCCGACTACGGCAAGCTGGAGATCAAGTGTATCTGCACCACCGGCAAGCTGCCCGTGCCCTGGCCCACCCTCGTGACCACCATGTCGTACGGCATTTTGTGCTTCGCGCGCTACCCCGAACACTTGAAGATGAACGACTTCTTCAAGTCCGCCATGCCCGCCGGCTACGTACAGGAGCGCACCATCATATTCCAGAATGACGGCAAGTACAAGACCCGTGGGGCGGTGAAGTTCGAGGGCGACACACTGGTGAACCGCATCGAGCTGAAGGGCATGGACTTCAAGGAGGAC…	2	amac30_1499	D1	4
MSKGEELFTGIVPVLIELDGDVHGHKFSVRGEGEGNADYGKLEIKVICTTGKLPVPWPTLVTSLSYGILCFARYPEHMKVYDFFKSAMPEGYIQKRTIFFQDDGMYKTRGEVKFVGNTLVNRVELKGMAFNEDGNILGHKLGYNFNSHKVYIMPDQANNGLKANFKTRHNIDGGGVQFADHYQTNVPLGAGPVLMPTNHYVSCQTALSKDRNETCDHMVILEVFSACGHTHDRNELYK*	D35N:F45V:T62S:M79V:N80Y:E94K:K104M:E114V:D116N:I122V:D128A:K130N:E141G:N148K:K155Q:V162A:I166T:E171D:L177F:D189A:I194M:I196T:L200V:I206L:R214C:F219I:F222V:G231D:M232R:D233N	D38N:F48V:T65S:M82V:N83Y:E98K:K108M:E118V:D120N:I126V:D132A:K134N:E145G:N152K:K159Q:V166A:I170T:E175D:L181F:D193A:I198M:I203T:L207V:I213L:R222C:F227I:F230V:G239D:M240R:D241N	amac	30	13	4.261332	4.737824	ATGAGCAAGGGCGAGGAGCTGTTCACCGGGATCGTGCCCGTCCTGATTGAGCTGGACGGCGACGTACACGGCCACAAGTTCAGCGTGCGCGGCGAGGGCGAGGGCAATGCCGACTACGGCAAGCTGGAGATCAAGGTTATCTGCACCACCGGCAAGCTGCCCGTGCCCTGGCCCACCCTCGTGACCAGCCTGTCGTACGGCATTTTGTGCTTCGCGCGCTACCCCGAACACATGAAGGTCTATGACTTCTTCAAGTCCGCCATGCCCGAAGGCTACATCCAGAAACGCACCATCTTCTTCCAGGACGACGGCATGTACAAGACCCGTGGGGAGGTGAAGTTCGTAGGCAATACACTGGTGAACCGCGTAGAGCTGAAGGGCATGGCATTCAATGAGGAC…	2	amac30_1097	D2	37
MSKGEELFTGIVPVLIELDGDVHGHKFSVRGEGGGDAAYGKLEIKFICTTGQLPVPWPTLVTTLSYGILCFARYPDHMKMNDFFKSAMPQGYIQERTIFFHDDGKYKTRGQVKFEGDTLVNRIELKGMDFKEDGNILGHKLEYNFNSHKVYIRPDKPNNGLKANFKVRHNIEGDEVLLANHCQTNVPLGYGRVLIPINHNLRSQSALRKDRNETRDHMVLLECFSACGHTNGMDEMNK*	E33G:D37A:K51Q:E75D:E89Q:Q100H:E110Q:N148K:M152R:A156P:V162A:I166V:G173D:G174E:Q176L:D179N:Y181C:D189Y:P191R:Y199N:S201R:C202S:T204S:I206L:S207R:F219L:F222C:H230N:L235M:Y236N	E36G:D40A:K54Q:E78D:E93Q:Q104H:E114Q:N152K:M156R:A160P:V166A:I170V:G177D:G178E:Q180L:D183N:Y185C:D193Y:P195R:Y206N:S208R:C209S:T211S:I213L:S214R:F227L:F230C:H238N:L243M:Y244N	amac	30	23	4.4067435	4.6406965	ATGAGCAAGGGCGAGGAGCTGTTCACCGGGATCGTGCCCGTCCTGATTGAGCTGGACGGCGACGTACACGGCCACAAGTTCAGCGTGCGCGGCGAGGGCGGAGGCGATGCCGCATACGGCAAGCTGGAGATCAAGTTCATCTGCACCACCGGCCAACTGCCCGTGCCCTGGCCCACCCTCGTGACCACCCTGTCGTACGGCATTTTGTGCTTCGCGCGCTACCCCGACCACATGAAGATGAACGACTTCTTCAAGTCCGCCATGCCCCAGGGCTACATCCAGGAGCGCACCATCTTCTTCCACGACGACGGCAAGTACAAGACCCGTGGGCAAGTGAAGTTCGAGGGCGACACACTGGTGAACCGCATCGAGCTGAAGGGCATGGACTTCAAGGAGGAC…	2	amac30_1772	D3	3
MSKGQALFTGIVPVMIELNGDVHGHKFSVRGEGEGDADYGKLEIKCICATGTLPVPWPTLVTTLSYGILCFARYPEHMKMNDFFKSTMPEGYIQERAIFFQADGKYKTRGEVKFEGETLVNRIELKGMDFKEAGNILGHKLEYTFNSHIVYIMPDQANNGLKANFQVRHNIEGGEVQLADHYQTNVPLGNGPVLIPVNHYLSSQSAISKDRNEARDHMVFLECFRACEYTHGRDEPYK*	E4Q:E5A:L14M:D18N:F45C:T48A:K51T:A86T:T96A:D101A:D116E:D132A:N143T:N148I:K155Q:V162A:K165Q:I166V:G174E:D189N:I196V:C202S:T204S:T213A:F222C:S224R:G227E:H228Y:M232R:L235P	E7Q:E8A:L17M:D21N:F48C:T51A:K54T:A89T:T100A:D105A:D120E:D136A:N147T:N152I:K159Q:V166A:K169Q:I170V:G178E:D193N:I203V:C209S:T211S:T221A:F230C:S232R:G235E:H236Y:M240R:L243P	amac	30	23	4.296969	4.7308407	ATGAGCAAGGGCCAGGCACTGTTCACCGGGATCGTGCCCGTCATGATTGAGCTGAACGGCGACGTACACGGCCACAAGTTCAGCGTGCGCGGCGAGGGCGAGGGCGATGCCGACTACGGCAAGCTGGAGATCAAGTGTATCTGCGCCACCGGCACCCTGCCCGTGCCCTGGCCCACCCTCGTGACCACCCTGTCGTACGGCATTTTGTGCTTCGCGCGCTACCCCGAACACATGAAGATGAACGACTTCTTCAAGTCCACTATGCCCGAAGGCTACATCCAGGAGCGCGCCATCTTCTTCCAGGCTGACGGCAAGTACAAGACCCGTGGGGAGGTGAAGTTCGAGGGCGAAACACTGGTGAACCGCATCGAGCTGAAGGGCATGGACTTCAAGGAGGCG…	2	amac30_2044	D4	4
MSKGEELFTGIVPVLIALDGDVHGHKFSVRGEGAGDADYGKLAIKFICTTGQLPVPWPTIVTSLSYGILCFARYPAHLKMNDFFKSAMPEGYIQERSIFFQDDGKYKTRGEVKFEGDTLVNRVELKGMDFKEDGNILGNKMEYNFNSHIVYIMPDKANNGLKGNFKVRLNIEGGGVLLAYHYQTNVPLGNSAVLIPSNHYLRCQTALSKDRNETRDHMVILEFFRACGPTPGMDELNN*	E16A:E33A:E42A:K51Q:L59I:T62S:E75A:M77L:T96S:I122V:H138N:L140M:N148I:V162G:I166V:H168L:Q176L:D179Y:D189N:G190S:P191A:I196S:S201R:I206L:F219I:S224R:H228P:H230P:Y236N:K237N	E19A:E36A:E45A:K54Q:L62I:T65S:E78A:M80L:T100S:I126V:H142N:L144M:N152I:V166G:I170V:H172L:Q180L:D183Y:D193N:G194S:P195A:I203S:S208R:I213L:F227I:S232R:H236P:H238P:Y244N:K245N	amac	30	12	4.281668	4.8019767	ATGAGCAAGGGCGAGGAGCTGTTCACCGGGATCGTGCCCGTCCTGATTGCACTGGACGGCGACGTACACGGCCACAAGTTCAGCGTGCGCGGCGAGGGCGCTGGCGATGCCGACTACGGCAAGCTGGCCATCAAGTTCATCTGCACCACCGGCCAACTGCCCGTGCCCTGGCCCACCATCGTGACCAGCCTGTCGTACGGCATTTTGTGCTTCGCGCGCTACCCCGCGCACCTGAAGATGAACGACTTCTTCAAGTCCGCCATGCCCGAAGGCTACATCCAGGAGCGCTCAATCTTCTTCCAGGACGACGGCAAGTACAAGACCCGTGGGGAGGTGAAGTTCGAGGGCGACACACTGGTGAACCGCGTCGAGCTGAAGGGCATGGACTTCAAGGAGGAC…	2	amac30_1330	D5	5
MSKGEELFTGIVPVLIALAGDVHGHKFSVRGEGKGDADYGKLEIKCICTTGMLPVPWPTLVTSMSYGILCFARYPEHMKKYDFFKSAMPEGYIQERTIFFQDDGKYKTRGEVKFEGDALVNRVELKGMDFKVDGNILGHKMEYNFNSHKVYIMPDKANIGLKAYFKVRLNIEGGVVQLAEHYQTNVPLCDGPVRIPINHYLSCQTAISKDRNESRDHMVFLECFSACAHTNGRDELCE*	E16A:D18A:E33K:F45C:K51M:T62S:L63M:M79K:N80Y:T117A:I122V:E131V:L140M:N148K:N158I:V162A:N163Y:I166V:H168L:G174V:D179E:G188C:L193R:T213S:F222C:G227A:H230N:M232R:Y236C:K237E	E19A:D21A:E36K:F48C:K54M:T65S:L66M:M82K:N83Y:T121A:I126V:E135V:L144M:N152K:N162I:V166A:N167Y:I170V:H172L:G178V:D183E:G192C:L197R:T221S:F230C:G235A:H238N:M240R:Y244C:K245E	amac	30	22	4.179297	4.72923	ATGAGCAAGGGCGAGGAGCTGTTCACCGGGATCGTGCCCGTCCTGATTGCGCTGGCCGGCGACGTACACGGCCACAAGTTCAGCGTGCGCGGCGAGGGCAAAGGCGATGCCGACTACGGCAAGCTGGAGATCAAGTGTATCTGCACCACCGGCATGCTGCCCGTGCCCTGGCCCACCCTCGTGACCTCAATGTCGTACGGCATTTTGTGCTTCGCGCGCTACCCCGAACACATGAAGAAGTATGACTTCTTCAAGTCCGCCATGCCCGAAGGCTACATCCAGGAGCGCACCATCTTCTTCCAGGACGACGGCAAGTACAAGACCCGTGGGGAGGTGAAGTTCGAGGGCGACGCCCTGGTGAACCGCGTTGAGCTGAAGGGCATGGACTTCAAGGTGGAC…	2	amac30_1940	D6	4
MSKGDELFTGIVPVMIELDGDVQGHKFGVRGEGEGDADYGKLEIKVICTTGKLPVPWPTLVTTLSYGILCIARYPEHMKMNDFFKSAMPQGYIQERTIFFRDDGKYKTRGEVKFEGDTLVNRIELKGMDFKEDGNILGHKMEYNFNSHKVNILPDQANNALKANFKVRLNIEGGGVQFAYHYQRNFPLCDGPVLTPINHHLICQTALSKDRNEARDHMVFLECFSACGHTNGRDELYK*	E4D:L14M:H22Q:S27G:F45V:F70I:E89Q:Q100R:L140M:N148K:Y150N:M152L:K155Q:G159A:V162A:I166V:H168L:L177F:D179Y:T183R:V185F:G188C:I194T:Y199H:S201I:I206L:T213A:F222C:H230N:M232R	E7D:L17M:H25Q:S30G:F48V:F73I:E93Q:Q104R:L144M:N152K:Y154N:M156L:K159Q:G163A:V166A:I170V:H172L:L181F:D183Y:T187R:V189F:G192C:I198T:Y206H:S208I:I213L:T221A:F230C:H238N:M240R	amac	30	23	4.199315	4.75419	ATGAGCAAGGGCGATGAGCTGTTCACCGGGATCGTGCCCGTCATGATTGAGCTGGACGGCGACGTACAGGGCCACAAGTTCGGTGTGCGCGGCGAGGGCGAGGGCGATGCCGACTACGGCAAGCTGGAGATCAAGGTTATCTGCACCACCGGCAAGCTGCCCGTGCCCTGGCCCACCCTCGTGACCACCCTGTCGTACGGCATTTTGTGCATAGCGCGCTACCCCGAACACATGAAGATGAACGACTTCTTCAAGTCCGCCATGCCCCAGGGCTACATCCAGGAGCGCACCATCTTCTTCCGGGACGACGGCAAGTACAAGACCCGTGGGGAGGTGAAGTTCGAGGGCGACACACTGGTGAACCGCATCGAGCTGAAGGGCATGGACTTCAAGGAGGAC…	2	amac30_1530	D7	4
MTKGEELFTGIVPVLIELEGDVHGHKFSVRGEGEGDADYGKLEIKVICTTGQLPVPWPTLVTTLSYGVLCFAHYPGHMKMHDFFKSAMPEGYIQERTISFQDDGKYKTRGEVKFEGDTLVNRIELKGMDFKEEGNILGRKLEYTFNSHIVYIMPDKPNNGLKGNFKTRHNIEGGVVQFADHDQKNVPLGDGPVLMPISHYLSSQTALSKDRNETRDHMVILEFFRACVHPHGMDGLYR*	S1T:D18E:F45V:K51Q:I67V:R72H:E75G:N80H:F98S:D132E:H138R:N143T:N148I:A156P:V162G:I166T:G174V:L177F:Y181D:T183K:I194M:N197S:C202S:I206L:F219I:S224R:G227V:T229P:E234G:K237R	S1T:D21E:F48V:K54Q:I70V:R75H:E78G:N83H:F102S:D136E:H142R:N147T:N152I:A160P:V166G:I170T:G178V:L181F:Y185D:T187K:I198M:N204S:C209S:I213L:F227I:S232R:G235V:T237P:E242G:K245R	amac	30	5	4.4181747	4.8265734	ATGACTAAGGGCGAGGAGCTGTTCACCGGGATCGTGCCCGTCCTGATTGAGCTGGAAGGCGACGTACACGGCCACAAGTTCAGCGTGCGCGGCGAGGGCGAGGGCGATGCCGACTACGGCAAGCTGGAGATCAAGGTTATCTGCACCACCGGCCAACTGCCCGTGCCCTGGCCCACCCTCGTGACCACCCTGTCGTACGGCGTGTTGTGCTTCGCGCACTACCCCGGCCACATGAAGATGCACGACTTCTTCAAGTCCGCCATGCCCGAAGGCTACATCCAGGAGCGCACCATCTCGTTCCAGGACGACGGCAAGTACAAGACCCGTGGGGAGGTGAAGTTCGAGGGCGACACACTGGTGAACCGCATCGAGCTGAAGGGCATGGACTTCAAGGAGGAG…	2	amac30_632	D8	23
MSKGEELFTGIVPVLIELEGDVHGHRFSVRGEGEGDADYGKLEIKCICTTGKLPVPWPTIVTTLSYGILCFARYPEHMKRNDFFKSAMPEGYIQERTIFFQDDGKYKTRGEVKFEGDTLVNRVELEGMDFREDGNILGHKMEYYFNSHIVFIVPDETNSGLKVNFTVRLNIEGGGVQLADHDQANVPLGDGPVLIPINHYLSSQSAISKDRNETSDHMVLLEVFSACAHTRGRDEMYK*	D18E:K25R:F45C:L59I:M79R:I122V:K125E:K130R:L140M:N143Y:N148I:Y150F:M152V:K155E:A156T:N158S:K165T:I166V:H168L:Y181D:T183A:C202S:T204S:R214S:F219L:F222V:G227A:H230R:M232R:L235M	D21E:K28R:F48C:L62I:M82R:I126V:K129E:K134R:L144M:N147Y:N152I:Y154F:M156V:K159E:A160T:N162S:K169T:I170V:H172L:Y185D:T187A:C209S:T211S:R222S:F227L:F230V:G235A:H238R:M240R:L243M	amac	30	16	4.270317	4.7421083	ATGAGCAAGGGCGAGGAGCTGTTCACCGGGATCGTGCCCGTCCTGATTGAGCTGGAGGGCGACGTACACGGCCACCGCTTCAGCGTGCGCGGCGAGGGCGAGGGCGATGCCGACTACGGCAAGCTGGAGATCAAGTGTATCTGCACCACCGGCAAGCTGCCCGTGCCCTGGCCCACCATAGTGACCACCCTGTCGTACGGCATTTTGTGCTTCGCGCGCTACCCCGAACACATGAAGCGTAACGACTTCTTCAAGTCCGCCATGCCCGAAGGCTACATCCAGGAGCGCACCATCTTCTTCCAGGACGACGGCAAGTACAAGACCCGTGGGGAGGTGAAGTTCGAGGGCGACACACTGGTGAACCGCGTGGAGCTGGAGGGCATGGACTTCCGGGAGGAC…	2	amac30_2121	D9	4
MSKGAELFTGIVPVLIELHADVHGHKFSVRGEGEGDADYGKLEIKVICTTGKLPVPWPTLVTTLSYGILCFARYPDHMKMNDFFKSAMPEGYIQERTIFFQDDGKYKTRGEVKFEAETLVNRVELKGMDFKEDGNILENKLEYNFNSHKVYIMPNKANNGLKGNFKVRHNIEGGGVQIAYHDQTNVPLGAGPVLMPINHHVSSRSTISKDRNEIRDHMVFLEVFSACGHAPGMDEPYK*	E4A:D18H:G19A:F45V:E75D:G115A:D116E:I122V:G137E:H138N:N148K:D154N:V162G:I166V:L177I:D179Y:Y181D:D189A:I194M:Y199H:L200V:C202S:Q203R:T204S:A205T:T213I:F222V:T229A:H230P:L235P	E7A:D21H:G22A:F48V:E78D:G119A:D120E:I126V:G141E:H142N:N152K:D158N:V166G:I170V:L181I:D183Y:Y185D:D193A:I198M:Y206H:L207V:C209S:Q210R:T211S:A212T:T221I:F230V:T237A:H238P:L243P	amac	30	9	4.3859406	4.8954096	ATGAGCAAGGGCGCTGAGCTGTTCACCGGGATCGTGCCCGTCCTGATTGAGCTGCATGCTGACGTACACGGCCACAAGTTCAGCGTGCGCGGCGAGGGCGAGGGCGATGCCGACTACGGCAAGCTGGAGATCAAGGTTATCTGCACCACCGGCAAGCTGCCCGTGCCCTGGCCCACCCTCGTGACCACCCTGTCGTACGGCATTTTGTGCTTCGCGCGCTACCCCGATCACATGAAGATGAACGACTTCTTCAAGTCCGCCATGCCCGAAGGCTACATCCAGGAGCGCACCATCTTCTTCCAGGACGACGGCAAGTACAAGACCCGTGGGGAGGTGAAGTTCGAGGCCGAGACACTGGTGAACCGCGTTGAGCTGAAGGGCATGGACTTCAAGGAGGAC…	2	amac30_301	D10	3
MSKGAELFTRIVPVLIELDGDVHGHMFSVRGEGEGDADYGKLEIKCICATGQLPVPWPTLVTTLSYGILCFARYPAHMKKHDFFKSAMPEGYIQERTIIFRDDGRYKTRGEVKFEGDTLVNRIELKGMDFKEDGNILGNQLEYNFNSHIVYIMPDEANNGLKGNFKVRHNIEGGGVQFADHSQTNVPLGDGPVLIPINHYLSSQSVIRKDRNETRDHMVFLEVFSACGHSHGRNKLYN*	E4A:G9R:K25M:F45C:T48A:K51Q:E75A:M79K:N80H:F98I:Q100R:K104R:H138N:K139Q:N148I:K155E:V162G:I166V:L177F:Y181S:C202S:T204S:A205V:S207R:F222V:T229S:M232R:D233N:E234K:K237N	E7A:G12R:K28M:F48C:T51A:K54Q:E78A:M82K:N83H:F102I:Q104R:K108R:H142N:K143Q:N152I:K159E:V166G:I170V:L181F:Y185S:C209S:T211S:A212V:S214R:F230V:T237S:M240R:D241N:E242K:K245N	amac	30	11	4.3140826	4.8044944	ATGAGCAAGGGCGCAGAGCTGTTCACCCGCATCGTGCCCGTCCTGATTGAGCTGGACGGCGACGTACACGGCCACATGTTCAGCGTGCGCGGCGAGGGCGAGGGCGATGCCGACTACGGCAAGCTGGAGATCAAGTGCATCTGCGCTACCGGCCAACTGCCCGTGCCCTGGCCCACCCTCGTGACCACCCTGTCGTACGGCATTTTGTGCTTCGCGCGCTACCCCGCACACATGAAGAAGCATGACTTCTTCAAGTCCGCCATGCCCGAAGGCTACATCCAGGAGCGCACCATCATATTCCGTGACGACGGCCGGTACAAGACCCGTGGGGAGGTGAAGTTCGAGGGCGACACACTGGTGAACCGCATCGAGCTGAAGGGCATGGACTTCAAGGAGGAC…	2	amac30_1238	D11	3
MSKGGELFTGTVPVMIALDGDVHGHKFSVRGEGEGDAAYGKLEIKCICTTGMLPVPWPTLVTTLSYGILCFARYPAHMKKNDFFKSAMPEGYIQERTIFFQDDGKYKTRGEVRFEGDTLVNRVELKGRDFKEAGNILGHKLEYNFNSHKVYIIPDNAHNGLKGNFKTRLNIEGGGVQFADHDQTNVPLGDDPVLIPINHYLSCQSAISKDRNEARDHMVFLEFFRACWNTNGVDELYK*	E4G:I10T:L14M:E16A:D37A:F45C:K51M:E75A:M79K:K112R:I122V:M127R:D132A:N148K:M152I:K155N:N157H:V162G:I166T:H168L:L177F:Y181D:G190D:T204S:T213A:S224R:G227W:H228N:H230N:M232V	E7G:I13T:L17M:E19A:D40A:F48C:K54M:E78A:M82K:K116R:I126V:M131R:D136A:N152K:M156I:K159N:N161H:V166G:I170T:H172L:L181F:Y185D:G194D:T211S:T221A:S232R:G235W:H236N:H238N:M240V	amac	30	17	4.173845	4.638382	ATGAGCAAGGGCGGCGAGCTGTTCACCGGGACTGTGCCCGTCATGATTGCACTGGACGGCGACGTACACGGCCACAAGTTCAGCGTGCGCGGCGAGGGCGAGGGCGATGCCGCATACGGCAAGCTGGAGATCAAGTGCATCTGCACCACCGGCATGCTGCCCGTGCCCTGGCCCACCCTCGTGACCACCCTGTCGTACGGCATTTTGTGCTTCGCGCGCTACCCCGCCCACATGAAGAAGAACGACTTCTTCAAGTCCGCCATGCCCGAAGGCTACATCCAGGAGCGCACCATCTTCTTCCAGGACGACGGCAAGTACAAGACCCGTGGGGAGGTGCGCTTCGAGGGCGACACACTGGTGAACCGCGTAGAGCTGAAGGGCCGCGACTTCAAGGAGGCG…	2	amac30_1894	D12	3
MPAMKIECRITGTLNGVDFEIAGGGEGIPELGCMTNNMKSTKGPLTFSPYLLSHVMGYGFYHFGTYPSDYENPFLHAIKNGGYANTRIEKYEDGGVLHISFAYRYESDSVIGDFKVVGTGFPEASVIFKDKIIRSNASVEHLHPKGDKVLVGAFARTFSLRDGGYYSFVVDSLMHFKGAIHTSILQNGGPIFAFRRVDEHHSNTELEILEHQHAYETPVDFE*	E17D:L20I:V21A:T27I:Q30L:R32C:K36N:A43P:G68D:N78K:T83A:V98I:S101A:A106S:G107D:R108S:D123A:T128K:T137S:M144K:N147K:S152A:H172L:S177G:P181T:M190I:E197D:L199H:G206E:V208L:Y210H:F214Y:K215E:I218V:A219D:A221E	E28D:L31I:V32A:T38I:Q41L:R43C:K47N:A54P:G79D:N91K:T96A:V111I:S114A:A119S:G120D:R121S:D136A:T141K:T151S:M158K:N162K:S167A:H187L:S192G:P196T:M205I:E212D:L214H:G226E:V228L:Y230H:F234Y:K235E:I238V:A239D:A241E	pplu	36	9	4.136481	4.679475	ATGCCAGCCATGAAAATCGAATGTCGCATTACGGGCACTCTGAACGGCGTGGATTTCGAGATCGCGGGCGGGGGCGAGGGCATCCCGGAACTTGGCTGCATGACCAACAACATGAAGTCCACCAAAGGCCCACTGACCTTTTCTCCGTACCTGCTCAGCCACGTTATGGGTTACGGCTTCTATCACTTCGGCACGTACCCCTCCGATTACGAGAATCCGTTCCTCCACGCTATCAAGAACGGTGGCTACGCCAATACGCGCATTGAAAAGTACGAGGACGGCGGCGTCCTTCACATCTCATTCGCTTATCGTTATGAGTCTGATTCAGTGATCGGCGACTTCAAGGTAGTGGGCACAGGCTTCCCTGAGGCGTCAGTCATCTTTAAGGACAAGATCATT…	2	pplu36_802	E1	4
MPALKIVCRITGTLNGVEFELVGGGKGTQELGCLANNMKSTKGALTFSPYLLSHVMGYGYYHFGTYPSDYENPFLHAINNGGYTNTRIEKYEDGGVLYVSFSYSYASGRVIGDFKVGGTGFPEESVIFTDKIVGSNSTVEHLHPMCDKVLEGSFTRTFSLRDGGYYSFVVDSRMDFKSAIHTSILQNGGPMFAFRSVEEVHSHTELEIVEFQHAFTTPIGVE*	M3L:E6V:E25K:P28Q:Q30L:R32C:M33L:T34A:K36N:F59Y:G68D:H97Y:R103S:E105A:A106S:V116G:D123E:I132V:R133G:A136S:G145C:N147K:V150E:A154T:H172R:H174D:P181T:R195S:L199V:N202H:G206E:Y210F:K215T:A219G:F220V:A221E	M14L:E17V:E36K:P39Q:Q41L:R43C:M44L:T45A:K47N:F70Y:G79D:H110Y:R116S:E118A:A119S:V129G:D136E:I145V:R147G:A150S:G160C:N162K:V165E:A169T:H187R:H189D:P196T:R210S:L214V:N222H:G226E:Y230F:K235T:A239G:F240V:A241E	pplu	36	13	4.132093	4.5878587	ATGCCAGCCCTTAAAATCGTGTGTCGCATTACGGGCACTCTGAACGGCGTGGAGTTCGAGCTCGTAGGCGGGGGCAAGGGCACCCAAGAACTCGGCTGTCTGGCTAACAATATGAAGTCCACCAAAGGCGCACTGACCTTTTCTCCGTACCTGCTCAGCCACGTTATGGGTTACGGCTATTATCACTTCGGCACGTACCCCTCCGATTACGAGAATCCGTTCCTCCACGCTATCAACAACGGTGGCTACACAAATACGCGCATTGAAAAGTACGAGGACGGCGGCGTCCTTTACGTATCATTCTCATATTCTTATGCAAGTGGTCGCGTGATCGGCGACTTCAAGGTAGGCGGCACAGGCTTCCCTGAGGAGTCAGTCATCTTTACGGACAAGATCGTT…	2	pplu36_2248	E2	4
MPAMKIECHISGTLNGVEFELVGGGEGIPERGCMANNLKSTKGALTFTPYLLSHVMGYGFYHFGAYPSGYVNPFFHSINNGGYTNTRIEKYEDGGVLHILFSYRYEARRVIGDFKVMGTSFPADSVIFTDKIVRSNATVEHLYPMADNVLIGSFARTFSLRDGGYYSSVVDSHMDFKRAIHPSILQNDGPMFAFRSVEEHHSNTELEIAEFQRAFTTSIALA*	R8H:T10S:T27I:Q30R:R32C:T34A:K36N:M37L:S47T:T64A:E70V:L74F:A76S:V98I:S99L:G107R:V116M:G119S:E122A:I132V:H142Y:G145A:V150I:F167S:H174D:S177R:G187D:R195S:L199H:G206E:V208A:Y210F:H212R:K215T:P217S:F220L	R19H:T21S:T38I:Q41R:R43C:T45A:K47N:M48L:S58T:T75A:E81V:L87F:A89S:V111I:S112L:G120R:V129M:G132S:E135A:I145V:H156Y:G160A:V165I:F182S:H189D:S192R:G202D:R210S:L214H:G226E:V228A:Y230F:H232R:K235T:P237S:F240L	pplu	36	11	4.1550894	4.572983	ATGCCAGCCATGAAAATCGAATGTCATATTAGTGGCACTCTGAACGGCGTGGAGTTCGAGCTCGTAGGCGGGGGCGAGGGCATCCCGGAACGCGGCTGTATGGCCAACAACCTGAAGTCCACCAAAGGCGCACTGACCTTTACCCCGTACCTGCTCAGCCACGTTATGGGTTACGGCTTCTATCACTTCGGCGCCTACCCCTCCGGTTACGTTAATCCGTTCTTTCACTCCATCAACAACGGTGGCTACACAAATACGCGCATTGAAAAGTACGAGGACGGCGGCGTCCTTCACATCCTTTTCTCATATCGTTATGAGGCGCGTCGCGTGATCGGCGACTTCAAGGTAATGGGCACATCCTTCCCTGCTGACTCAGTCATCTTTACGGACAAGATCGTG…	2	pplu36_141	E3	12
MPDMKIECRITGTLNGVEFELVGGGKGIPEQGSMTNEMKSTKGTLTFSPYLLSHVMGYGFYQFGTFPSGYENPFLHAIKNGGYTNTRIERYEDGGVFNISFSYRYESGRVIGDFKVGGTSFPEASVIFTDKIIGSNATVEHLYPMGDKVLVGSFARTFSLRDGGYYSSVVDSQMHFKRVIHRCILQNGGPMFAFRCVEEHRSTTKLEIVEYQHTFETPIAYE*	A2D:E25K:T27I:R32S:K36E:A43T:H61Q:Y65F:N78K:K89R:L96F:H97N:V98I:A106S:V116G:G119S:D123A:R133G:H142Y:N147K:F167S:H172Q:S177R:A178V:P181R:S182C:R195C:L199H:H200R:N202T:E204K:G206E:A213T:K215E:F220Y:A221E	A2D:E36K:T38I:R43S:K47E:A54T:H72Q:Y76F:N91K:K102R:L109F:H110N:V111I:A119S:V129G:G132S:D136A:R147G:H156Y:N162K:F182S:H187Q:S192R:A193V:P196R:S197C:R210C:L214H:H215R:N222T:E224K:G226E:A233T:K235E:F240Y:A241E	pplu	36	10	4.1469345	4.499188	ATGCCAGACATGAAAATCGAATGTCGCATTACGGGCACTCTGAACGGCGTGGAGTTCGAGCTCGTAGGCGGGGGCAAAGGCATACCGGAACAGGGCAGTATGACCAACGAGATGAAGTCCACCAAAGGCACACTGACCTTTTCTCCGTACCTGCTCAGCCACGTTATGGGTTACGGCTTCTATCAGTTCGGCACGTTTCCCTCCGGTTACGAGAATCCGTTCCTCCACGCTATCAAGAACGGTGGCTACACAAATACGCGCATTGAACGGTACGAGGACGGCGGCGTCTTTAACATTTCATTCTCATATCGTTATGAGTCAGGTCGCGTGATCGGCGACTTCAAGGTAGGGGGCACATCGTTCCCTGAGGCCTCAGTCATCTTTACGGACAAGATCATT…	2	pplu36_2485	E4	3
MLAMEIECRIAGTLNGVEFELAGGGEGNPEQGHMTNNMKSTKGALTFSPYLLSHVMGYGFYHFGTYPSGYENPFLHAINNGGYTNTRIERYEDGGVLHVLFAYRYAPRRVMGDFKVVGTGFPKASVIFTDKIICSNASVEHLHPMGANVLVGSFARTFSLRDGGYYSYVVDSHILFQRAIHPSILQNDGPMFAFRSVEEHHTITELEVVEFQHAFKRPIDLE*	P1L:K4E:T10A:V21A:T27N:R32H:K36N:K89R:S99L:S101A:E105A:A106P:G107R:I110M:E122K:D123A:R133C:T137S:D146A:F167Y:M173I:H174L:K176Q:S177R:G187D:R195S:L199H:S201T:N202I:G206E:I207V:Y210F:T216R:A219D:F220L:A221E	P1L:K15E:T21A:V32A:T38N:R43H:K47N:K102R:S112L:S114A:E118A:A119P:G120R:I123M:E135K:D136A:R147C:T151S:D161A:F182Y:M188I:H189L:K191Q:S192R:G202D:R210S:L214H:S221T:N222I:G226E:I227V:Y230F:T236R:A239D:F240L:A241E	pplu	36	21	4.145053	4.564908	ATGCTGGCCATGGAAATCGAATGTCGCATTGCGGGCACTCTGAACGGCGTGGAGTTCGAGCTCGCGGGCGGGGGCGAGGGCAATCCGGAACAGGGCCACATGACCAACAATATGAAGTCCACCAAAGGCGCACTGACCTTTTCTCCGTACCTGCTCAGCCACGTTATGGGTTACGGCTTCTATCACTTCGGCACGTACCCCTCCGGTTACGAGAATCCGTTCCTCCACGCTATCAACAACGGTGGCTACACAAATACGCGCATTGAACGCTACGAGGACGGCGGCGTCCTTCACGTATTATTCGCTTATCGTTATGCACCTCGCCGCGTGATGGGCGACTTCAAGGTAGTGGGCACAGGCTTCCCTAAAGCCTCAGTCATCTTTACGGACAAGATCATT…	2	pplu36_2838	E5	3
MPDMKIACRITGTLNGVEFELAGGGEGAPEQGCMSNKMKSTKGALTFSPYLLSHVLGYGFYYFGTYPSGYENPFLHAIKNGGHTNKRIERYEDGGVLQVSFSYRYGARRVIGDFKVVGTSFPEDSVIFTNKIIRSNASVEHLHPTGDKVLVGSFARTFSLRGGGYYSFVVDSQMHFKSAIHSSILQNCGPMFAFRCVEEFHSNTKLEIAECQHAFEAPTGVE*	A2D:E6A:V21A:T27A:R32C:T34S:M55L:H61Y:N78K:Y82H:T85K:K89R:H97Q:E105G:G107R:G119S:D129N:T137S:M144T:N147K:D161G:H172Q:P181S:G187C:R195C:L199F:E204K:G206E:V208A:Y210C:K215E:T216A:I218T:A219G:F220V:A221E	A2D:E17A:V32A:T38A:R43C:T45S:M66L:H72Y:N91K:Y95H:T98K:K102R:H110Q:E118G:G120R:G132S:D142N:T151S:M158T:N162K:D176G:H187Q:P196S:G202C:R210C:L214F:E224K:G226E:V228A:Y230C:K235E:T236A:I238T:A239G:F240V:A241E	pplu	36	20	4.182462	4.5781937	ATGCCAGATATGAAAATCGCATGTCGCATTACGGGCACTCTGAACGGCGTGGAGTTCGAGCTCGCAGGCGGGGGCGAGGGCGCTCCGGAACAGGGCTGCATGAGCAACAAGATGAAGTCCACCAAAGGCGCACTGACCTTTTCTCCGTACCTGCTCAGCCACGTTCTCGGTTACGGCTTCTATTATTTCGGCACGTACCCCTCCGGTTACGAGAATCCGTTCCTCCACGCTATCAAGAACGGTGGCCACACAAATAAACGCATTGAACGGTACGAGGACGGCGGCGTCCTTCAGGTATCATTCTCATATCGTTATGGAGCGCGCCGCGTGATCGGCGACTTCAAGGTAGTGGGCACATCTTTCCCTGAGGACTCAGTCATCTTTACGAATAAGATCATT…	2	pplu36_2031	E6	3
MPDMKIECRITGTLNGVEFDLVGGGEGNPEQGCMSNNMKSTKGALTFSPYLLSHVMGYGYYHFGTYPSGYENPFLHAIINGGYTNTRLEKYEDGGVLQVSFAYRYEARRVIGDFKVVGTDFPDDSVIFTDKIIRSNASVEHFLPMGDKVLVGSFARTFSLRDGGYYSSVVDSQMNFKSAIHPSILQDAGPLFVFRSVVELHTNIELAIAEFQQAFKKPIALE*	A2D:E19D:T27N:R32C:T34S:K36N:F59Y:N78I:I87L:H97Q:S101A:G107R:G119D:E122D:T137S:L141F:H142L:N147K:F167S:H172Q:H174N:N186D:G187A:M190L:A192V:R195S:E197V:S201T:T203I:G206A:V208A:Y210F:H212Q:T216K:F220L:A221E	A2D:E30D:T38N:R43C:T45S:K47N:F70Y:N91I:I100L:H110Q:S114A:G120R:G132D:E135D:T151S:L155F:H156L:N162K:F182S:H187Q:H189N:N201D:G202A:M205L:A207V:R210S:E212V:S221T:T223I:G226A:V228A:Y230F:H232Q:T236K:F240L:A241E	pplu	36	15	4.199705	4.514534	ATGCCAGACATGAAAATCGAATGTCGCATTACGGGCACTCTGAACGGCGTGGAGTTCGACCTCGTAGGCGGGGGCGAGGGCAATCCGGAACAGGGCTGTATGTCGAACAATATGAAGTCCACCAAAGGCGCACTGACCTTTTCTCCGTACCTGCTCAGCCACGTTATGGGTTACGGCTACTATCACTTCGGCACGTACCCCTCCGGTTACGAGAATCCGTTCCTCCACGCTATCATCAACGGTGGCTACACAAATACGCGCTTGGAAAAGTACGAGGACGGCGGCGTCCTTCAGGTATCATTCGCTTATCGTTATGAGGCGCGTCGCGTGATCGGCGACTTCAAGGTAGTGGGCACAGATTTCCCTGACGACTCAGTCATCTTTACGGACAAGATCATT…	2	pplu36_1568	E7	19
MPAMKIECRITGTLNGVEFELVGGGAGNPEQGCMTNNMKATKGALTFSPYLLSHVMGYGFYHFGTYPSDYENPFFHAINNGGYTNTRIERFEDGGVLNVSFSYRYEARRVFGDFKVMGTGFPKDSLIFANKIIGSNATVEHLYPMGNNVLVGSFARTFSLRGGGYYAYVVDSRMHFKSAIHQGILQNGGPMFAFRRVDEFHSNTELEILEFQDAFTTPVDFE*	E25A:T27N:R32C:K36N:S39A:G68D:L74F:K89R:Y90F:H97N:G107R:I110F:V116M:E122K:V125L:T128A:D129N:R133G:H142Y:D146N:D161G:S166A:F167Y:H172R:P181Q:S182G:E197D:L199F:G206E:V208L:Y210F:H212D:K215T:I218V:A219D:A221E	E36A:T38N:R43C:K47N:S50A:G79D:L87F:K102R:Y103F:H110N:G120R:I123F:V129M:E135K:V138L:T141A:D142N:R147G:H156Y:D161N:D176G:S181A:F182Y:H187R:P196Q:S197G:E212D:L214F:G226E:V228L:Y230F:H232D:K235T:I238V:A239D:A241E	pplu	36	12	4.2469482	4.607051	ATGCCAGCCATGAAAATCGAATGTCGCATTACGGGCACTCTGAACGGCGTGGAGTTCGAGCTCGTAGGCGGGGGCGCAGGCAACCCGGAACAGGGCTGTATGACCAACAATATGAAGGCAACCAAAGGCGCACTGACCTTTTCTCCGTACCTGCTCAGCCACGTTATGGGTTACGGCTTCTATCACTTCGGCACGTACCCCTCCGACTACGAGAATCCGTTCTTTCACGCTATCAACAACGGTGGCTACACAAATACGCGCATTGAACGGTTTGAGGACGGCGGCGTCCTTAATGTATCATTCTCATATCGTTATGAGGCGCGGCGCGTGTTCGGCGACTTCAAGGTAATGGGCACAGGCTTCCCTAAGGACTCACTTATCTTTGCTAACAAGATCATT…	2	pplu36_17	E8	3
MLDMKIECRITGTLNGEEFELVGGGEGIPERGLMSNNMKPTKGALTFSPYLLSHVMGYGFYHFGMYPSGFENPFLHAINNGGYTNTRIEKYEDGGVLHASFSYRYKEGRVIGDFKVMGTSFPEGSVIFTNRIIGSNATVEHFYPMGDNVLVGSFARTFSLRDGGYYSYVVDSHMHFKSAIHPSILQHSGPMFAFRSVEEHNSNTELEIVEFQRSFETAIDFS*	P1L:A2D:V16E:T27I:Q30R:R32L:T34S:K36N:S39P:T64M:Y69F:V98A:E105K:A106E:V116M:G119S:D123G:D129N:K130R:R133G:L141F:H142Y:F167Y:N186H:G187S:R195S:L199H:H200N:G206E:Y210F:H212R:A213S:K215E:P217A:A219D:A221S	P1L:A2D:V27E:T38I:Q41R:R43L:T45S:K47N:S50P:T75M:Y80F:V111A:E118K:A119E:V129M:G132S:D136G:D142N:K143R:R147G:L155F:H156Y:F182Y:N201H:G202S:R210S:L214H:H215N:G226E:Y230F:H232R:A233S:K235E:P237A:A239D:A241S	pplu	36	11	4.13592	4.6438503	ATGTTAGATATGAAAATCGAATGTCGCATTACGGGCACTCTGAACGGCGAGGAGTTCGAGCTCGTAGGCGGGGGCGAGGGCATTCCGGAACGCGGCCTGATGAGTAACAACATGAAGCCGACCAAAGGCGCACTGACCTTTTCTCCGTACCTGCTCAGCCACGTTATGGGTTACGGCTTCTATCACTTCGGCATGTACCCCTCCGGTTTTGAGAATCCGTTCCTCCACGCTATCAACAACGGTGGCTACACAAATACGCGCATTGAAAAGTACGAGGACGGCGGCGTCCTTCACGCATCATTCTCATATCGTTATAAGGAGGGTCGCGTGATCGGCGACTTCAAGGTAATGGGCACATCCTTCCCTGAGGGGTCAGTCATCTTTACGAATCGCATCATT…	2	pplu36_5007	E9	3
MPDLKIECRITGNLNGVKFELVGGGKGTPEQGLMSNKMKSTKGALPFSPYLLSHVMGYGFYHFGTYPSGYVNPFLHAINNGGYTNTRIEKYEDGGLLYVSFSYRYESGRVIGDFKVLGTGFPADSVIFKDKIIGSNESVEHLHPMGDKLLVGSFARTFSLSDGGYYSSVVVSLMHFKSAIHPSILQNGGPMFAFRRVVEVHRSTELEIVEFQRAFTTPVDIE*	A2D:M3L:T12N:E17K:E25K:R32L:T34S:T45P:E70V:V95L:H97Y:A106S:V116L:E122A:T128K:R133G:A136E:T137S:N147K:V148L:R160S:F167S:D170V:H172L:E197V:L199V:S201R:N202S:G206E:Y210F:H212R:K215T:I218V:A219D:F220I:A221E	A2D:M14L:T23N:E28K:E36K:R43L:T45S:T56P:E81V:V108L:H110Y:A119S:V129L:E135A:T141K:R147G:A150E:T151S:N162K:V163L:R175S:F182S:D185V:H187L:E212V:L214V:S221R:N222S:G226E:Y230F:H232R:K235T:I238V:A239D:F240I:A241E	pplu	36	6	4.242448	4.4692073	ATGCCAGACTTGAAAATCGAATGTCGCATTACGGGCAATCTGAACGGCGTGAAATTCGAGCTCGTAGGCGGGGGCAAAGGCACCCCGGAACAGGGCCTTATGAGTAACAAGATGAAGTCCACCAAAGGCGCACTGCCGTTTTCTCCGTACCTGCTCAGCCACGTTATGGGTTACGGCTTCTATCACTTCGGCACGTACCCCTCCGGTTACGTTAATCCGTTCCTCCACGCTATCAACAACGGTGGCTACACAAATACGCGCATTGAAAAGTACGAGGACGGCGGCCTGCTTTACGTATCATTCTCATATCGTTATGAGAGTGGTCGCGTGATCGGCGACTTCAAGGTATTGGGCACAGGCTTCCCTGCAGACTCAGTCATCTTTAAAGACAAGATCATT…	2	pplu36_4995	E10	82
MLDMKIECRITGTLNDADFELVGGGGGTPELGCMSNNMKATKGALTFSPYLLSHVMGYGFYHFGTYPSGYANPFLHSIHNGGYTNTRIEKYEDGGVLHVSFSYRYEAGRVIGDFKVVGTSFPEDSVIFTDKIIRSNASVEHLHPKGNKVLVGAFARTFSLRDGGYYASVADSHMHFKSAIHPSILQNAGPMFAFRRVDEFHRNTKLAIDEFQDAFTSPIDLA*	P1L:A2D:G15D:V16A:E17D:E25G:Q30L:R32C:T34S:K36N:S39A:E70A:A76S:N78H:G119S:T137S:M144K:D146N:N147K:S152A:S166A:F167S:V169A:G187A:E197D:L199F:S201R:E204K:G206A:V208D:Y210F:H212D:K215T:T216S:A219D:F220L	P1L:A2D:G26D:V27A:E28D:E36G:Q41L:R43C:T45S:K47N:S50A:E81A:A89S:N91H:G132S:T151S:M158K:D161N:N162K:S167A:S181A:F182S:V184A:G202A:E212D:L214F:S221R:E224K:G226A:V228D:Y230F:H232D:K235T:T236S:A239D:F240L	pplu	36	12	4.1374674	4.64491	ATGTTGGACATGAAAATCGAATGTCGCATTACGGGCACTCTGAACGACGCGGATTTCGAGCTCGTAGGCGGGGGCGGCGGCACCCCGGAATTAGGCTGCATGAGTAACAACATGAAGGCCACCAAAGGCGCACTGACCTTTTCTCCGTACCTGCTCAGCCACGTTATGGGTTACGGCTTCTATCACTTCGGCACGTACCCCTCCGGTTACGCAAATCCGTTCCTCCACTCCATCCACAACGGTGGCTACACAAATACGCGCATTGAAAAGTACGAGGACGGCGGCGTCCTTCACGTATCATTCTCATATCGTTATGAGGCGGGTCGCGTGATCGGCGACTTCAAGGTAGTGGGCACATCATTCCCTGAGGACTCAGTCATCTTTACGGACAAGATCATT…	2	pplu36_3610	E11	3
MPDMKIECRIAGTLNGVKFELVGGGEGIPEQGLMTNNVKSTKGALTFSPYLLSHVMGYGFYHFGTYPSGYENPFFHAIDKGGYTNTRIEKYEDGGVLNVLFAYHYESGRVMGDFKVVGTGFPADSVIFADKIIRSNATVEHLHPMGDNMLVGSFARTFSLRDGGYYSYVVDSHMHFKSTIHSSILQNGGPMFAFRSVVEFHNNTELEIVEFQDVFTRRIDYE*	A2D:T10A:E17K:T27I:R32L:K36N:M37V:L74F:N78D:N79K:H97N:S99L:S101A:R103H:A106S:I110M:E122A:T128A:V148M:F167Y:A178T:P181S:R195S:E197V:L199F:S201N:G206E:Y210F:H212D:A213V:K215T:T216R:P217R:A219D:F220Y:A221E	A2D:T21A:E28K:T38I:R43L:K47N:M48V:L87F:N91D:N92K:H110N:S112L:S114A:R116H:A119S:I123M:E135A:T141A:V163M:F182Y:A193T:P196S:R210S:E212V:L214F:S221N:G226E:Y230F:H232D:A233V:K235T:T236R:P237R:A239D:F240Y:A241E	pplu	36	15	4.1400967	4.488636	ATGCCAGACATGAAAATCGAATGTCGCATTGCAGGCACTCTGAACGGCGTGAAGTTCGAGCTCGTAGGCGGGGGCGAGGGCATACCGGAACAGGGCCTTATGACCAACAATGTGAAGTCCACCAAAGGCGCACTGACCTTTTCTCCGTACCTGCTCAGCCACGTTATGGGTTACGGCTTCTATCACTTCGGCACGTACCCCTCCGGTTACGAGAATCCGTTCTTTCACGCTATCGACAAGGGTGGCTACACAAATACGCGCATTGAAAAGTACGAGGACGGCGGCGTCCTTAACGTATTGTTCGCGTATCACTATGAGAGTGGTCGCGTGATGGGCGACTTCAAGGTAGTGGGCACAGGCTTCCCTGCCGACTCAGTCATCTTTGCTGACAAGATCATT…	2	pplu36_591	E12	3
MPATKIECRITGTLNGVEFELVGGGEGTPELGCMSNNLKSTKGALTFSPYLLSHVMGYGFYHFAMYPPGYENPFRQAIINGGYTNTRIEKYDDGGVLHASFSYRYESDRVIGDFKVMGTGFPVDSIIFTGKIVGSNASVEHFHPMGNNLLVGSFARTFSLRDGRYYSSVVDSHMHFNSAIHPSILQHAGPMFAFRSVDEHHSNTELEILEFQHAFKMLIVYE*	M3T:Q30L:R32C:T34S:K36N:M37L:G63A:T64M:S67P:L74R:H75Q:N78I:E91D:V98A:A106S:G107D:V116M:E122V:V125I:D129G:I132V:R133G:T137S:L141F:D146N:V148L:G163R:F167S:K176N:N186H:G187A:R195S:E197D:L199H:G206E:V208L:Y210F:T216M:P217L:A219V:F220Y:A221E	M14T:Q41L:R43C:T45S:K47N:M48L:G74A:T75M:S78P:L87R:H88Q:N91I:E104D:V111A:A119S:G120D:V129M:E135V:V138I:D142G:I145V:R147G:T151S:L155F:D161N:V163L:G178R:F182S:K191N:N201H:G202A:R210S:E212D:L214H:G226E:V228L:Y230F:T236M:P237L:A239V:F240Y:A241E	pplu	42	14	4.0263767	4.55963	ATGCCAGCCACTAAAATCGAATGTCGCATTACGGGCACTCTGAACGGCGTGGAGTTCGAGCTCGTAGGCGGGGGCGAGGGCACCCCGGAACTCGGCTGTATGTCAAACAACTTGAAGTCCACCAAAGGCGCACTGACCTTTTCTCCGTACCTGCTCAGCCACGTTATGGGTTACGGCTTCTATCACTTCGCCATGTACCCCCCTGGTTACGAGAATCCGTTCCGCCAGGCTATCATAAACGGTGGCTACACAAATACGCGCATTGAAAAGTACGACGACGGCGGCGTCCTTCACGCGTCATTCTCATATCGTTATGAGTCGGATCGCGTGATCGGCGACTTCAAGGTAATGGGCACAGGCTTCCCTGTCGACTCAATAATCTTTACGGGAAAGATCGTG…	2	pplu42_2763	F1	3
MLDMKIESRISGTLNGAEFELVGGGKGNPERGCMSNNMKSTKGPLTFSPYLLSHVMGYGFYQFGTYPSDYKNPFLHATNNGGYTNKRIEKYEDGGVLHVSFSYRYEVRRVIGNFRVVGTCFPEDSLIFTNKIIRSNASVEHLHPMGDNVLVGSFARTFSLRDGGYYSSVVESHMNFESAIHASILENAGPMFAFRSVVEHHRKTELGIVEFQRAFKTLIDFE*	P1L:A2D:C7S:T10S:V16A:E25K:T27N:Q30R:R32C:T34S:K36N:A43P:H61Q:G68D:E70K:I77T:T85K:A106V:G107R:D112N:K114R:G119C:V125L:D129N:T137S:F167S:D170E:H174N:K176E:P181A:Q185E:G187A:R195S:E197V:L199H:S201R:N202K:Y210F:H212R:P217L:A219D:A221E	P1L:A2D:C18S:T21S:V27A:E36K:T38N:Q41R:R43C:T45S:K47N:A54P:H72Q:G79D:E81K:I90T:T98K:A119V:G120R:D125N:K127R:G132C:V138L:D142N:T151S:F182S:D185E:H189N:K191E:P196A:Q200E:G202A:R210S:E212V:L214H:S221R:N222K:Y230F:H232R:P237L:A239D:A241E	pplu	42	11	4.042245	4.585756	ATGCTTGATATGAAAATCGAAAGTCGCATTTCCGGCACTCTGAACGGCGCGGAGTTCGAGCTCGTAGGCGGGGGCAAGGGCAATCCGGAACGTGGCTGTATGTCGAACAACATGAAGTCCACCAAAGGCCCACTGACCTTTTCTCCGTACCTGCTCAGCCACGTTATGGGTTACGGCTTCTATCAATTCGGCACGTACCCCTCCGATTACAAAAATCCGTTCCTCCACGCTACCAACAACGGTGGCTACACAAATAAGCGCATTGAAAAGTACGAGGACGGCGGCGTCCTTCACGTATCATTCTCATATCGTTATGAGGTCCGGCGCGTGATCGGCAATTTCCGTGTAGTGGGCACATGCTTCCCTGAGGACTCACTGATCTTTACGAATAAGATCATT…	2	pplu42_1747	F2	3
MLALKIECRITGTLNGVDFELAGGGEGTTEQGCMSNNMRSTKGALTFTPYLLSHVMGYGFYHFGAYPSDYENPFLHAVNNGGYTNTRIEKYEDGGVLNASFAYRYVAGRVIGDFRVEGTSFPKDSVIFMDKIIGSNASVEHLHLLGANVLVGSFARTFSLRDGGYYSSVADSHMHFKSAIHTSILQNGGPMFVFRSVDEHHSNTELEIVEFQQAFTTPNDLE*	P1L:M3L:E17D:V21A:P28T:R32C:T34S:K36N:K38R:S47T:T64A:G68D:I77V:H97N:V98A:S101A:E105V:K114R:V116E:G119S:E122K:T128M:R133G:T137S:P143L:M144L:D146A:F167S:V169A:P181T:A192V:R195S:E197D:L199H:G206E:Y210F:H212Q:K215T:I218N:A219D:F220L:A221E	P1L:M14L:E28D:V32A:P39T:R43C:T45S:K47N:K49R:S58T:T75A:G79D:I90V:H110N:V111A:S114A:E118V:K127R:V129E:G132S:E135K:T141M:R147G:T151S:P157L:M158L:D161A:F182S:V184A:P196T:A207V:R210S:E212D:L214H:G226E:Y230F:H232Q:K235T:I238N:A239D:F240L:A241E	pplu	42	17	4.0818796	4.596776	ATGTTGGCCCTGAAAATCGAATGTCGCATTACGGGCACTCTGAACGGCGTGGATTTCGAGCTCGCCGGCGGGGGCGAGGGCACCACAGAACAGGGCTGTATGTCTAACAACATGCGTTCCACCAAAGGCGCACTGACCTTTACACCGTACCTGCTCAGCCACGTTATGGGTTACGGCTTCTATCACTTCGGCGCCTACCCCTCCGATTACGAGAATCCGTTCCTCCACGCTGTCAACAACGGTGGCTACACAAATACGCGCATTGAAAAGTACGAGGACGGCGGCGTCCTTAACGCGTCATTCGCTTATCGTTATGTAGCGGGTCGCGTGATCGGCGACTTCCGCGTAGAAGGCACATCTTTCCCTAAGGACTCAGTCATCTTTATGGACAAGATCATT…	2	pplu42_2946	F3	3
MPDMKIECRITGTLNGGEFELVGGGEGSQELGCMSNNMKATKGALSFSPYMLSHVMGYGFYHFGTYPTGYENPFLHAIHNGGYTNKRIEKYEDGGVLHVSFSYRYKEGRVIGDFKVEGTCFPKASVIFKDKIIRSNPSVEHLHPMGDKVLLGTFARTFSLRDGGYYSSVAASQMHFKSAIHPSIMQNGGPMFAFRCVEEHHSNTVLEVAEFQRAFKRPIDFE*	A2D:V16G:T27S:P28Q:Q30L:R32C:T34S:K36N:S39A:T45S:L50M:S67T:N78H:T85K:E105K:A106E:V116E:G119C:E122K:D123A:T128K:A136P:T137S:N147K:V150L:S152T:F167S:V169A:D170A:H172Q:L184M:R195C:L199H:E204V:G206E:I207V:V208A:Y210F:H212R:T216R:A219D:A221E	A2D:V27G:T38S:P39Q:Q41L:R43C:T45S:K47N:S50A:T56S:L61M:S78T:N91H:T98K:E118K:A119E:V129E:G132C:E135K:D136A:T141K:A150P:T151S:N162K:V165L:S167T:F182S:V184A:D185A:H187Q:L199M:R210C:L214H:E224V:G226E:I227V:V228A:Y230F:H232R:T236R:A239D:A241E	pplu	42	18	3.9969103	4.5727806	ATGCCAGATATGAAAATCGAATGTCGCATTACGGGCACTCTGAACGGCGGCGAGTTCGAGCTCGTAGGCGGGGGCGAGGGCAGCCAAGAACTTGGCTGCATGTCTAACAATATGAAGGCAACCAAAGGCGCACTGTCGTTTTCTCCGTACATGCTCAGCCACGTTATGGGTTACGGCTTCTATCACTTCGGCACGTACCCCACGGGTTACGAGAATCCGTTCCTCCACGCTATCCACAACGGTGGCTACACAAATAAGCGCATTGAAAAGTACGAGGACGGCGGCGTCCTTCACGTATCATTCTCATATCGTTATAAAGAGGGTCGCGTGATCGGCGACTTCAAGGTAGAGGGCACATGTTTCCCTAAGGCCTCAGTCATCTTTAAAGACAAGATCATT…	2	pplu42_3250	F4	3
MPDLEIECRITGTLNGVDFELVGGGEGNPDLGCMANNMKSTKGTLTFSPYLLSHVMGYGFYHFGTYSPDYENPFLQSINNGGYTNTRIEKYEDGGVLHISFTYRYESGSVIGDFRVVGTGFPEDSVIFTDKIIRSNSTVEHLHPMADNLLVGSFARTFSLRDGGYYSSLVDSHMHFKSAIHLSILENGGPMFAFRSVDEHHRNTKLEIAEFQNVFTTPLDFE*	A2D:M3L:K4E:E17D:T27N:E29D:Q30L:R32C:T34A:K36N:A43T:P66S:S67P:G68D:H75Q:A76S:V98I:S101T:A106S:R108S:K114R:A136S:G145A:V148L:F167S:V168L:P181L:Q185E:R195S:E197D:L199H:S201R:E204K:G206E:V208A:Y210F:H212N:A213V:K215T:I218L:A219D:A221E	A2D:M14L:K15E:E28D:T38N:E40D:Q41L:R43C:T45A:K47N:A54T:P77S:S78P:G79D:H88Q:A89S:V111I:S114T:A119S:R121S:K127R:A150S:G160A:V163L:F182S:V183L:P196L:Q200E:R210S:E212D:L214H:S221R:E224K:G226E:V228A:Y230F:H232N:A233V:K235T:I238L:A239D:A241E	pplu	42	13	4.180498	4.620057	ATGCCAGATTTGGAAATCGAATGTCGCATTACGGGCACTCTGAACGGCGTGGATTTCGAGCTCGTAGGCGGGGGCGAGGGCAATCCGGATCTCGGCTGTATGGCTAACAATATGAAGTCCACCAAAGGCACTCTGACCTTTTCTCCGTACCTGCTCAGCCACGTTATGGGTTACGGCTTCTATCACTTCGGCACGTACTCGCCCGACTACGAGAATCCGTTCCTCCAATCGATCAACAACGGTGGCTACACAAATACGCGCATTGAAAAGTACGAGGACGGCGGCGTCCTTCACATTTCATTCACGTATCGTTATGAGTCGGGTTCTGTGATCGGCGACTTCCGTGTAGTGGGCACAGGCTTCCCTGAGGACTCAGTCATCTTTACGGACAAGATCATT…	2	pplu42_4030	F5	3
MSDMRIACRITGILNGVEFELAGGGGGNPEQGCMANNLKATKGALTFSPYLLSHVMGYGFYHFGTYPSDHENPFLHSINNGGHTNTRLERYEDGGVLRVSFSYCYAEGRVIGDFKAVGTGFPEDSVIFTDKIIGSNASVEHLHPMDDKVLVGSFARTFSLRDGGYYSYVVDSLMNFKSAIHPSILQNDGPMFAFRCVEEHHSSTVLEIVEFQHVFQTPIDFE*	P1S:A2D:K4R:E6A:T12I:V21A:E25G:T27N:R32C:T34A:K36N:M37L:S39A:G68D:Y69H:A76S:Y82H:I87L:K89R:H97R:R103C:E105A:A106E:V115A:R133G:T137S:G145D:N147K:F167Y:H172L:H174N:G187D:R195C:L199H:N202S:E204V:G206E:Y210F:A213V:K215Q:A219D:A221E	P1S:A2D:K15R:E17A:T23I:V32A:E36G:T38N:R43C:T45A:K47N:M48L:S50A:G79D:Y80H:A89S:Y95H:I100L:K102R:H110R:R116C:E118A:A119E:V128A:R147G:T151S:G160D:N162K:F182Y:H187L:H189N:G202D:R210C:L214H:N222S:E224V:G226E:Y230F:A233V:K235Q:A239D:A241E	pplu	42	15	3.990669	4.615425	ATGTCAGACATGCGCATCGCTTGTCGCATTACGGGCATTCTGAACGGCGTGGAGTTCGAGCTCGCTGGCGGGGGCGGGGGCAACCCGGAACAGGGCTGCATGGCAAACAACCTGAAGGCGACCAAAGGCGCACTGACCTTTTCTCCGTACCTGCTCAGCCACGTTATGGGTTACGGCTTCTATCACTTCGGCACGTACCCCTCCGATCACGAGAATCCGTTCCTCCACTCGATCAACAACGGTGGCCATACAAATACGCGCCTCGAACGCTACGAGGACGGCGGCGTCCTTCGCGTATCATTCTCATATTGCTATGCAGAGGGTCGCGTGATCGGCGACTTCAAGGCGGTGGGCACAGGCTTCCCTGAGGACTCAGTCATCTTTACGGACAAGATCATT…	2	pplu42_4827	F6	3
MPDMKIECRISGTLNGVEFELVGGGKGNPELGRLANNMKATKGALTFSPYLLSHVMGYGYYHFGMYPSDYENPFLHAINSGGYTNTRIERYEDGGVLHISFSYRYASGRVIGNFKVVGTDFPADSVIFTDKIIGSNASVEHLNPVDNKMLVGSFARTFSLRGGGYYSYVVASLMHFKSAIHSSILQNGGPMFAFRRVDEFHNNTKLEIVEFQHAFTTAIAFE*	A2D:T10S:E25K:T27N:Q30L:M33L:T34A:K36N:S39A:F59Y:T64M:G68D:N79S:K89R:V98I:E105A:A106S:D112N:G119D:E122A:R133G:T137S:H142N:M144V:G145D:D146N:N147K:V148M:D161G:F167Y:D170A:H172L:P181S:E197D:L199F:S201N:E204K:G206E:Y210F:K215T:P217A:A221E	A2D:T21S:E36K:T38N:Q41L:M44L:T45A:K47N:S50A:F70Y:T75M:G79D:N92S:K102R:V111I:E118A:A119S:D125N:G132D:E135A:R147G:T151S:H156N:M158V:G160D:D161N:N162K:V163M:D176G:F182Y:D185A:H187L:P196S:E212D:L214F:S221N:E224K:G226E:Y230F:K235T:P237A:A241E	pplu	42	12	3.9958541	4.602093	ATGCCAGACATGAAAATCGAATGTCGCATTTCGGGCACTCTGAACGGCGTGGAGTTCGAGCTCGTAGGCGGGGGCAAAGGCAATCCGGAACTCGGCCGCTTAGCTAACAACATGAAGGCTACCAAAGGCGCACTGACCTTTTCTCCGTACCTGCTCAGCCACGTTATGGGTTACGGCTATTATCACTTCGGCATGTACCCCTCCGACTACGAGAATCCGTTCCTCCACGCTATCAACTCCGGTGGCTACACAAATACGCGCATTGAACGGTACGAGGACGGCGGCGTCCTTCACATATCATTCTCATATCGTTATGCGAGCGGTCGCGTGATCGGCAACTTCAAGGTAGTGGGCACAGATTTCCCTGCAGACTCAGTCATCTTTACGGACAAGATCATT…	2	pplu42_5240	F7	3
MPDMKIACRIAGTLNGAEFELAGGGKGNPEQGCMNNNMKSTKGALTFSPYLLSHVMGYGFYHFGTYPSGYKNPFFHSINNGGYTNTRVEKYEDGGVLHVSFSYRYEAGRVIGDFKVVGTSFPEDSAIFSDKIISSNSSVEHLHPKGNKVLVGAFARTFSLRDGGYYSYVAESRMHFKGAIHPSILQNGGPMFAFRRVDEHHITIELEILEFQDAFMTPTVFE*	A2D:E6A:T10A:V16A:V21A:E25K:T27N:R32C:T34N:K36N:E70K:L74F:A76S:I87V:G119S:V125A:T128S:R133S:A136S:T137S:M144K:D146N:N147K:S152A:F167Y:V169A:D170E:H172R:S177G:E197D:L199H:S201I:N202T:T203I:G206E:V208L:Y210F:H212D:K215M:I218T:A219V:A221E	A2D:E17A:T21A:V27A:V32A:E36K:T38N:R43C:T45N:K47N:E81K:L87F:A89S:I100V:G132S:V138A:T141S:R147S:A150S:T151S:M158K:D161N:N162K:S167A:F182Y:V184A:D185E:H187R:S192G:E212D:L214H:S221I:N222T:T223I:G226E:V228L:Y230F:H232D:K235M:I238T:A239V:A241E	pplu	42	17	3.9818065	4.5830245	ATGCCAGACATGAAAATCGCATGTCGCATTGCCGGCACTCTGAACGGCGCCGAGTTCGAGCTCGCGGGCGGGGGCAAGGGCAACCCGGAACAGGGCTGCATGAATAACAATATGAAGTCCACCAAAGGCGCACTGACCTTTTCTCCGTACCTGCTCAGCCACGTTATGGGTTACGGCTTCTATCACTTCGGCACGTACCCCTCCGGTTACAAGAATCCGTTCTTCCACTCCATCAACAACGGTGGCTACACAAATACGCGCGTAGAAAAGTACGAGGACGGCGGCGTCCTTCACGTATCATTCTCATATCGTTATGAGGCGGGTCGCGTGATCGGCGACTTCAAGGTAGTGGGCACATCATTCCCTGAGGACTCAGCTATCTTTAGCGACAAGATCATT…	2	pplu42_3344	F8	4
MPAMKIECRITGTLNGVDFELVGGGEGNPEQGSMINNMNSTKGALPFSPYLLSHVMGYGFYHFGTYPSDYENPFLHAINNGGYTNKRVERYEDGGVLHISFSYSYESRRVIGDFKAVGTSYPVDSVIFTDKIIGSNASVEHLHPIGDKVLVGSFARTFSLRDGGYYSYVVDSRMHFKSEIHPSVLQNGGPMFAFRCVDEHHSTTVLVIAEFQDAFTTANDLE*	E17D:T27N:R32S:T34I:K36N:K38N:T45P:G68D:T85K:I87V:K89R:V98I:R103S:A106S:G107R:V115A:G119S:F120Y:E122V:R133G:T137S:M144I:N147K:F167Y:H172R:A178E:I183V:R195C:E197D:L199H:N202T:E204V:G206V:V208A:Y210F:H212D:K215T:P217A:I218N:A219D:F220L:A221E	E28D:T38N:R43S:T45I:K47N:K49N:T56P:G79D:T98K:I100V:K102R:V111I:R116S:A119S:G120R:V128A:G132S:F133Y:E135V:R147G:T151S:M158I:N162K:F182Y:H187R:A193E:I198V:R210C:E212D:L214H:N222T:E224V:G226V:V228A:Y230F:H232D:K235T:P237A:I238N:A239D:F240L:A241E	pplu	42	15	3.9807327	4.577327	ATGCCAGCCATGAAAATCGAATGTCGCATTACGGGCACTCTGAACGGCGTGGACTTCGAGCTCGTAGGCGGGGGCGAGGGCAACCCGGAACAGGGCTCTATGATCAACAACATGAATTCCACCAAAGGCGCACTGCCCTTTTCTCCGTACCTGCTCAGCCACGTTATGGGTTACGGCTTCTATCACTTCGGCACGTACCCCTCCGACTACGAGAATCCGTTCCTCCACGCTATCAACAACGGTGGCTACACAAATAAACGCGTTGAACGTTACGAGGACGGCGGCGTCCTTCACATATCATTCTCATATAGTTATGAGTCCCGTCGCGTGATCGGCGACTTCAAGGCTGTGGGCACATCCTACCCTGTGGACTCAGTCATCTTTACGGACAAGATCATT…	2	pplu42_2833	F9	3
MPDLKIECRIAGTLNGAVFELEGGGEGTPERGCMANNMKSTKGALTFSPYLLSHVMGYGFYHFGTYPSDYVNPFHYAVNNGGYTNTRIEKYEDGGVLHISFSYRYEGGRVIGDFKVVGTSFPDESVIFTDKIIRSNASVEHLHPMAGKVLAGSFARTFSLRGGGYYSSVVDSHMNFKNAIHPSILQNAGPMFAFRSVVEHHRSTELEIVEFQRSFKTAIDFE*	A2D:M3L:T10A:V16A:E17V:V21E:Q30R:R32C:T34A:K36N:G68D:E70V:L74H:H75Y:I77V:V98I:A106G:G119S:E122D:D123E:T137S:G145A:D146G:N147K:V150A:D161G:F167S:H174N:S177N:G187A:R195S:E197V:L199H:S201R:N202S:G206E:Y210F:H212R:A213S:P217A:A219D:A221E	A2D:M14L:T21A:V27A:E28V:V32E:Q41R:R43C:T45A:K47N:G79D:E81V:L87H:H88Y:I90V:V111I:A119G:G132S:E135D:D136E:T151S:G160A:D161G:N162K:V165A:D176G:F182S:H189N:S192N:G202A:R210S:E212V:L214H:S221R:N222S:G226E:Y230F:H232R:A233S:P237A:A239D:A241E	pplu	42	13	4.091145	4.605976	ATGCCAGACTTGAAAATCGAATGTCGCATTGCCGGCACTCTGAACGGCGCAGTGTTCGAGCTCGAGGGCGGGGGCGAGGGCACCCCGGAACGCGGCTGCATGGCTAACAATATGAAGTCCACCAAAGGCGCACTGACCTTTTCTCCGTACCTGCTCAGCCACGTTATGGGTTACGGCTTCTATCACTTCGGCACGTACCCCTCCGATTACGTGAATCCGTTCCACTACGCTGTCAACAACGGTGGCTACACAAATACGCGCATTGAAAAGTACGAGGACGGCGGCGTCCTTCACATATCATTCTCATATCGTTATGAGGGCGGTCGCGTGATCGGCGACTTCAAGGTAGTGGGCACATCTTTCCCTGACGAGTCAGTCATCTTTACGGACAAGATCATT…	2	pplu42_1731	F10	3
MPAMKIGCRISGTLNGVEFVLVGGGKGNPELGCMNNNMKSTKGALTFSPYLLSHVMGYGFYHFATYPSGYENPFLHAINNGGYTNTRIEKYEDGGVLRISFSYRCKEGRVIGDFKVVGTSFPEDSVIFMDKIVGSNPTVEHLHPMGDKLLVGSFARTFSLRDGGYYSYVVDSQMHFKRAIHPSILQDAGPMFAFRCVDEHHNTTKLEVAEFQHTFTTPIDYE*	E6G:T10S:E19V:E25K:T27N:Q30L:R32C:T34N:K36N:G63A:H97R:V98I:Y104C:E105K:A106E:G119S:T128M:I132V:R133G:A136P:N147K:V148L:F167Y:H172Q:S177R:N186D:G187A:R195C:E197D:L199H:S201N:N202T:E204K:G206E:I207V:V208A:Y210F:A213T:K215T:A219D:F220Y:A221E	E17G:T21S:E30V:E36K:T38N:Q41L:R43C:T45N:K47N:G74A:H110R:V111I:Y117C:E118K:A119E:G132S:T141M:I145V:R147G:A150P:N162K:V163L:F182Y:H187Q:S192R:N201D:G202A:R210C:E212D:L214H:S221N:N222T:E224K:G226E:I227V:V228A:Y230F:A233T:K235T:A239D:F240Y:A241E	pplu	42	15	4.190607	4.6514125	ATGCCAGCCATGAAAATCGGCTGTCGCATTTCTGGCACTCTGAACGGCGTGGAGTTCGTCCTCGTAGGCGGGGGCAAAGGCAACCCGGAACTCGGCTGCATGAATAACAACATGAAGTCCACCAAAGGCGCACTGACCTTTTCTCCGTACCTGCTCAGCCACGTTATGGGTTACGGCTTCTATCACTTCGCCACGTACCCCTCCGGTTACGAGAATCCGTTCCTCCACGCTATCAACAACGGTGGCTACACAAATACGCGCATTGAAAAGTACGAGGACGGCGGCGTCCTTCGTATATCATTCTCATATCGTTGTAAGGAGGGTCGCGTGATCGGCGACTTCAAGGTAGTGGGCACATCGTTCCCTGAGGACTCAGTCATCTTTATGGACAAGATCGTT…	2	pplu42_2510	F11	3
MPAMKIECRITGSLNGAEFELAGGGKGTPELGCMINNMKSTKGALTFSPYLLSHVMGYGFYHFGMYPSGYENPFHHAINNGGYTNKRIERYEDGGVLHASFSYRYKTGRVIGDFKVVGTSFPKDSVIFTNKIICSNPSVEHLHPMADKVLAGSFARTFSLRDGRYYSSVADSQMHFKSEIHPSILQNGGPMFAFRRVEEHHTSAELEIAEFQDAFERPIDLE*	T12S:V16A:V21A:E25K:Q30L:R32C:T34I:K36N:T64M:L74H:T85K:K89R:V98A:E105K:A106T:G119S:E122K:D129N:R133C:A136P:T137S:G145A:N147K:V150A:G163R:F167S:V169A:H172Q:A178E:L199H:S201T:N202S:T203A:G206E:V208A:Y210F:H212D:K215E:T216R:A219D:F220L:A221E	T23S:V27A:V32A:E36K:Q41L:R43C:T45I:K47N:T75M:L87H:T98K:K102R:V111A:E118K:A119T:G132S:E135K:D142N:R147C:A150P:T151S:G160A:N162K:V165A:G178R:F182S:V184A:H187Q:A193E:L214H:S221T:N222S:T223A:G226E:V228A:Y230F:H232D:K235E:T236R:A239D:F240L:A241E	pplu	42	18	4.089885	4.5644054	ATGCCAGCCATGAAAATCGAATGTCGCATTACGGGCAGCCTGAACGGCGCTGAGTTCGAGCTCGCGGGCGGGGGCAAGGGCACCCCGGAATTAGGCTGCATGATTAACAATATGAAGTCCACCAAAGGCGCACTGACCTTTTCTCCGTACCTGCTCAGCCACGTTATGGGTTACGGCTTCTATCACTTCGGCATGTACCCCTCCGGTTACGAGAATCCGTTCCATCACGCTATCAACAACGGTGGCTACACAAATAAGCGCATTGAACGGTACGAGGACGGCGGCGTCCTTCACGCTTCATTCTCATATCGTTATAAAACCGGTCGCGTGATCGGCGACTTCAAGGTAGTGGGCACATCCTTCCCTAAGGACTCAGTCATCTTTACGAATAAGATCATT…	2	pplu42_3258	F12	2
MLDMKIECHISGTLNGMDFELVGGGAGTPERGCMNNNMKYTKGALTFSPYLLSHVMGYGFYHFGTYPSGYVNPFLDAIHTGGYTNTRLEKFEDGGVLQVSFSYHYKERRVIGDFKVGGTGFPEASVIFTDKIIGSNASVEHLHPMADKVLVGSFARTFSLRDGGYYSYVVDSLMHFKGAIHPSILQNAGPMFAFRSVDEVRSNTKLRILEFQRTFETPTDLE*	P1L:A2D:R8H:T10S:V16M:E17D:E25A:Q30R:R32C:T34N:K36N:S39Y:E70V:H75D:N78H:N79T:I87L:Y90F:H97Q:R103H:E105K:A106E:G107R:V116G:D123A:R133G:T137S:G145A:N147K:F167Y:H172L:S177G:G187A:R195S:E197D:L199V:H200R:E204K:G206R:V208L:Y210F:H212R:A213T:K215E:I218T:A219D:F220L:A221E	P1L:A2D:R19H:T21S:V27M:E28D:E36A:Q41R:R43C:T45N:K47N:S50Y:E81V:H88D:N91H:N92T:I100L:Y103F:H110Q:R116H:E118K:A119E:G120R:V129G:D136A:R147G:T151S:G160A:N162K:F182Y:H187L:S192G:G202A:R210S:E212D:L214V:H215R:E224K:G226R:V228L:Y230F:H232R:A233T:K235E:I238T:A239D:F240L:A241E	pplu	48	21	3.9535742	4.5431104	ATGCTTGACATGAAAATCGAATGTCATATTAGTGGCACTCTGAACGGCATGGACTTCGAGCTCGTAGGCGGGGGCGCTGGCACCCCGGAACGGGGCTGTATGAATAACAATATGAAGTATACCAAAGGCGCACTGACCTTTTCTCCGTACCTGCTCAGCCACGTTATGGGTTACGGCTTCTATCACTTCGGCACGTACCCCTCCGGTTACGTTAATCCGTTCCTCGACGCTATCCACACTGGTGGCTACACAAATACGCGCTTAGAAAAGTTCGAGGACGGCGGCGTCCTTCAGGTATCATTCTCATATCATTATAAAGAGCGCCGCGTGATCGGCGACTTCAAGGTAGGGGGCACAGGCTTCCCTGAGGCATCAGTCATCTTTACGGACAAGATCATT…	2	pplu48_8182	G1	3
MPALKIECRIKGSLNGGEFDLVGGGEGTPELGSMSNNMNSSKGALTFSPYLLSHVMGYGFYHFGTYPSDYENPFLHAINNGGYTNTRIEKYEDGGVLHVSFSYRYESRRVIGDFKLLGTGFPADSVIFADKIIGSNASVEHLHPMGNKLLVGAFARTFSLRGGGYYSYEVASLMDFKSAVHSSILQNGGPMFVFRSVDEHYSHIKLEVVEFQHSFQKPIDFE*	M3L:T10K:T12S:V16G:E19D:Q30L:R32S:T34S:K36N:K38N:T40S:G68D:A106S:G107R:V115L:V116L:E122A:T128A:R133G:T137S:D146N:N147K:V148L:S152A:D161G:F167Y:V168E:D170A:H172L:H174D:I179V:P181S:A192V:R195S:E197D:L199H:H200Y:N202H:T203I:E204K:G206E:I207V:Y210F:A213S:K215Q:T216K:A219D:A221E	M14L:T21K:T23S:V27G:E30D:Q41L:R43S:T45S:K47N:K49N:T51S:G79D:A119S:G120R:V128L:V129L:E135A:T141A:R147G:T151S:D161N:N162K:V163L:S167A:D176G:F182Y:V183E:D185A:H187L:H189D:I194V:P196S:A207V:R210S:E212D:L214H:H215Y:N222H:T223I:E224K:G226E:I227V:Y230F:A233S:K235Q:T236K:A239D:A241E	pplu	48	18	3.9297285	4.649415	ATGCCAGCCCTTAAAATCGAATGTCGCATTAAGGGCAGTCTGAACGGCGGCGAGTTCGACCTCGTAGGCGGGGGCGAGGGCACCCCGGAATTAGGCTCGATGTCCAACAATATGAATTCCTCAAAAGGCGCACTGACCTTTTCTCCGTACCTGCTCAGCCACGTTATGGGTTACGGCTTCTATCACTTCGGCACGTACCCCTCCGACTACGAGAATCCGTTCCTCCACGCTATCAACAACGGTGGCTACACAAATACGCGCATTGAAAAGTACGAGGACGGCGGCGTCCTTCACGTATCATTCTCATATCGTTATGAGAGCCGGCGCGTGATCGGCGACTTCAAGTTATTGGGCACAGGCTTCCCTGCAGACTCAGTCATCTTTGCCGACAAGATCATT…	2	pplu48_29612	G2	3
MLDLRIVCRITGSLNGVEFVLVGGGKGNPEQGLMTNNMTSTKGALTFSPYLLSHVMGYGFYHFGMYPSDYENPFFHAINNGGYTNKRIEKYEDGGVLHISFSYRYEECRVIGDFKVMGTSFPKDSVIFTNKIIRSNATVEHLHPMGDKLLVGAFARTFSLRDGGYYACLADSQMDFKRAIHPSILQNDGPMFAFRSVVDHHTNTELEVVEFQDAFTTPNDVE*	P1L:A2D:M3L:K4R:E6V:T12S:E19V:E25K:T27N:R32L:K36N:K38T:T64M:G68D:L74F:T85K:V98I:A106E:G107C:V116M:G119S:E122K:D129N:N147K:V148L:S152A:S166A:F167C:V168L:V169A:H172Q:H174D:S177R:G187D:R195S:E197V:E198D:L199H:S201T:G206E:I207V:Y210F:H212D:K215T:I218N:A219D:F220V:A221E	P1L:A2D:M14L:K15R:E17V:T23S:E30V:E36K:T38N:R43L:K47N:K49T:T75M:G79D:L87F:T98K:V111I:A119E:G120C:V129M:G132S:E135K:D142N:N162K:V163L:S167A:S181A:F182C:V183L:V184A:H187Q:H189D:S192R:G202D:R210S:E212V:E213D:L214H:S221T:G226E:I227V:Y230F:H232D:K235T:I238N:A239D:F240V:A241E	pplu	48	13	4.043599	4.6207275	ATGCTCGATTTACGTATCGTGTGTCGCATTACGGGCTCTCTGAACGGCGTGGAGTTCGTGCTCGTAGGCGGGGGCAAGGGCAATCCGGAACAGGGCCTGATGACCAACAACATGACCTCCACCAAAGGCGCACTGACCTTTTCTCCGTACCTGCTCAGCCACGTTATGGGTTACGGCTTCTATCACTTCGGCATGTACCCCTCCGATTACGAGAATCCGTTCTTCCACGCTATCAACAACGGTGGCTACACAAATAAACGCATTGAAAAGTACGAGGACGGCGGCGTCCTTCACATCTCATTCTCATATCGTTATGAGGAATGCCGCGTGATCGGCGACTTCAAGGTAATGGGCACAAGTTTCCCTAAAGACTCAGTCATCTTTACGAACAAGATCATT…	2	pplu48_13321	G3	3
MPDMKIECRISGTLNGVEFELVGGGKGNPEQGCMSNNMKSTKGSLTFSPYLLSHVMGYGFYHFGTYPSDYGNPFLHAIHNGGYTNTRIEKYEDGGVLHVLLAYRYESRRVIGDFQAMGTGFPDASVIFSNKIIRSNATVEHLHPMGDNLLVGSFARTFSLRNGGYYSSMVDSRMLFKCTLHPGILQNGGPMFAFRSVVEHHRITVLEVVEFQHSFTRPIDVE*	A2D:T10S:E25K:T27N:R32C:T34S:K36N:A43S:G68D:E70G:N78H:S99L:F100L:S101A:A106S:G107R:K114Q:V115A:V116M:E122D:D123A:T128S:D129N:V148L:D161N:F167S:V168M:H172R:H174L:S177C:A178T:I179L:S182G:R195S:E197V:L199H:S201R:N202I:E204V:G206E:I207V:Y210F:A213S:K215T:T216R:A219D:F220V:A221E	A2D:T21S:E36K:T38N:R43C:T45S:K47N:A54S:G79D:E81G:N91H:S112L:F113L:S114A:A119S:G120R:K127Q:V128A:V129M:E135D:D136A:T141S:D142N:V163L:D176N:F182S:V183M:H187R:H189L:S192C:A193T:I194L:S197G:R210S:E212V:L214H:S221R:N222I:E224V:G226E:I227V:Y230F:A233S:K235T:T236R:A239D:F240V:A241E	pplu	48	18	3.931707	4.6486998	ATGCCAGATATGAAAATCGAATGTCGCATTAGTGGCACTCTGAACGGCGTGGAGTTCGAGCTCGTAGGCGGGGGCAAAGGCAACCCGGAACAGGGCTGCATGAGTAACAACATGAAGTCCACCAAAGGCTCTCTGACCTTTTCTCCGTACCTGCTCAGCCACGTTATGGGTTACGGCTTCTATCACTTCGGCACGTACCCCTCCGATTACGGCAATCCGTTCCTCCACGCTATCCACAACGGTGGCTACACAAATACGCGCATTGAAAAGTACGAGGACGGCGGCGTCCTTCACGTATTATTAGCTTATCGTTATGAGTCTCGGCGCGTGATCGGCGACTTCCAGGCCATGGGCACAGGCTTCCCTGACGCATCAGTCATCTTTTCAAATAAGATCATT…	2	pplu48_16308	G4	3
MLALKIACRIMGTLNGVEFELVGGGEGTQELGCLSNEMKSTKGVLTFSPYLLSHVMGYGFYHFAAYPSGYENPFHHAIKKGGYTNMRIEKYEDGGVLNVTFSYRYEEGRVTGDFRVVGTGFPKDSVIFTDKIVGSNSSVEHLHPMADKLLVGSFARTFSLRNGGYYSFVVDSHMHFKSAIHLSILQNGGPMFAFRSVVEVHRNTKLEVVEFQDTFTSPNDLE*	P1L:M3L:E6A:T10M:P28Q:Q30L:R32C:M33L:T34S:K36E:A43V:G63A:T64A:L74H:N78K:N79K:T85M:H97N:S99T:A106E:I110T:K114R:E122K:I132V:R133G:A136S:T137S:G145A:N147K:V148L:D161N:P181L:R195S:E197V:L199V:S201R:E204K:G206E:I207V:Y210F:H212D:A213T:K215T:T216S:I218N:A219D:F220L:A221E	P1L:M14L:E17A:T21M:P39Q:Q41L:R43C:M44L:T45S:K47E:A54V:G74A:T75A:L87H:N91K:N92K:T98M:H110N:S112T:A119E:I123T:K127R:E135K:I145V:R147G:A150S:T151S:G160A:N162K:V163L:D176N:P196L:R210S:E212V:L214V:S221R:E224K:G226E:I227V:Y230F:H232D:A233T:K235T:T236S:I238N:A239D:F240L:A241E	pplu	48	19	3.9549856	4.596053	ATGCTCGCCCTGAAAATCGCTTGTCGCATTATGGGCACTCTGAACGGCGTGGAGTTCGAGCTCGTAGGCGGGGGCGAGGGCACCCAGGAACTCGGCTGTCTCTCCAACGAAATGAAGTCCACCAAAGGCGTCCTGACCTTTTCTCCGTACCTGCTCAGCCACGTTATGGGTTACGGCTTCTATCACTTCGCGGCCTACCCCTCCGGTTACGAGAATCCGTTCCACCACGCTATCAAAAAGGGTGGCTACACAAATATGCGCATTGAAAAGTACGAGGACGGCGGCGTCCTTAATGTAACGTTCTCATATCGTTATGAGGAGGGTCGCGTGACAGGCGACTTCCGTGTAGTGGGCACAGGCTTCCCTAAGGACTCAGTCATCTTTACGGACAAGATCGTA…	2	pplu48_34538	G5	3
MPDLKIACRITGTLNGVEFELVGGGVGSPEQGCMSNNLKSAKGALTFSPYLLSHVMGYGFYHFGTYTPGYENPFLHAINDGGYTNTRLEKYEDGGVLHVLFSYRYGTGRVFGDFKVVGTSFPKDSVIFTDRIVGSNASVEHLHPRGDKVLVGSFARTFTLRDGGYYSSVVDSRMDFKSAIHRSILQNGAPMFAFRSVDEHHTNTKMEILEFQHAFESSTGLE*	A2D:M3L:E6A:E25V:T27S:R32C:T34S:K36N:M37L:T40A:P66T:S67P:N79D:I87L:S99L:E105G:A106T:I110F:G119S:E122K:K130R:I132V:R133G:T137S:M144R:N147K:S158T:F167S:H172R:H174D:P181R:G188A:R195S:E197D:L199H:S201T:E204K:L205M:G206E:V208L:Y210F:K215E:T216S:P217S:I218T:A219G:F220L:A221E	A2D:M14L:E17A:E36V:T38S:R43C:T45S:K47N:M48L:T51A:P77T:S78P:N92D:I100L:S112L:E118G:A119T:I123F:G132S:E135K:K143R:I145V:R147G:T151S:M158R:N162K:S173T:F182S:H187R:H189D:P196R:G203A:R210S:E212D:L214H:S221T:E224K:L225M:G226E:V228L:Y230F:K235E:T236S:P237S:I238T:A239G:F240L:A241E	pplu	48	19	4.064249	4.541415	ATGCCAGATCTGAAAATCGCATGTCGCATTACGGGCACTCTGAACGGCGTGGAGTTCGAGCTCGTAGGCGGGGGCGTTGGCTCTCCGGAACAGGGCTGTATGTCTAACAATCTTAAGTCCGCCAAAGGCGCACTGACCTTTTCTCCGTACCTGCTCAGCCACGTTATGGGTTACGGCTTCTATCACTTCGGCACGTACACGCCCGGTTACGAGAATCCGTTCCTCCACGCTATCAACGATGGTGGCTACACAAATACGCGCCTCGAAAAGTACGAGGACGGCGGCGTCCTTCACGTACTCTTCTCATATCGTTATGGCACCGGTCGCGTGTTCGGCGACTTCAAGGTAGTGGGCACATCATTCCCTAAAGACTCAGTCATCTTTACGGACCGGATCGTG…	2	pplu48_18475	G6	3
MPDLKIECRITGTLNGVDFELVGGGAGIPELGCMSNNLKATKGALSFSPHLLSHVMGYGFYHFGTYPSDFENPFLQAVHNGGYTNTRIERYEDGGVLHILFSYRYESRRVIGDFQVVGTGFPEDSAIFTDKIVGSNATVEHLHPKADKVLIGSFARTFSLRDGGYYSYVVDSLMHFKSAIHRSIRQNDGPMFAFRSVVEHRSTTELEILEYQDSFQTPIDFE*	A2D:M3L:E17D:E25A:T27I:Q30L:R32C:T34S:K36N:M37L:S39A:T45S:Y49H:G68D:Y69F:H75Q:I77V:N78H:K89R:V98I:S99L:A106S:G107R:K114Q:V125A:I132V:R133G:M144K:G145A:N147K:V150I:F167Y:H172L:P181R:L184R:G187D:R195S:E197V:L199H:H200R:N202T:G206E:V208L:H212D:A213S:K215Q:A219D:A221E	A2D:M14L:E28D:E36A:T38I:Q41L:R43C:T45S:K47N:M48L:S50A:T56S:Y60H:G79D:Y80F:H88Q:I90V:N91H:K102R:V111I:S112L:A119S:G120R:K127Q:V138A:I145V:R147G:M158K:G160A:N162K:V165I:F182Y:H187L:P196R:L199R:G202D:R210S:E212V:L214H:H215R:N222T:G226E:V228L:H232D:A233S:K235Q:A239D:A241E	pplu	48	18	3.95649	4.526233	ATGCCAGATTTGAAAATCGAATGTCGCATTACGGGCACTCTGAACGGCGTGGACTTCGAGCTCGTAGGCGGGGGCGCAGGCATTCCGGAACTTGGCTGTATGTCTAACAATCTCAAGGCCACCAAAGGCGCACTGTCATTTTCTCCGCATCTGCTCAGCCACGTTATGGGTTACGGCTTCTATCACTTCGGCACGTACCCCTCCGACTTCGAGAATCCGTTCCTCCAAGCTGTCCATAACGGTGGCTACACAAATACGCGCATTGAACGTTACGAGGACGGCGGCGTCCTTCACATACTTTTCTCATATCGTTATGAGAGCCGTCGCGTGATCGGCGACTTCCAGGTAGTGGGCACAGGCTTCCCTGAGGACTCAGCAATCTTTACGGACAAGATCGTC…	2	pplu48_33590	G7	3
MSDMKIECRISGTLNGGEFELVGGGKGTPGLGRLSNNMKSTKGPLTFSPYLLSHVMGYGFYHFGMYPSGYENPFLHAIKNGGYTNKRNERFEDGGVLHISFSYRYAGRRVIGDFTVVGTSFPEDSVIFKDKIIRSNASVEHMHPRCDTVLVGSFARTFSLLDGGYYSYVVDSHMHFKRAIHPSILQNGGPMFAFRSVVEFNSTTKLEIVEFQDTFESAIDLE*	P1S:A2D:T10S:V16G:E25K:E29G:Q30L:M33L:T34S:K36N:A43P:T64M:N78K:T85K:I87N:K89R:Y90F:V98I:E105A:A106G:G107R:K114T:G119S:T128K:T137S:L141M:M144R:G145C:N147T:R160L:F167Y:S177R:R195S:E197V:L199F:H200N:N202T:E204K:G206E:Y210F:H212D:A213T:K215E:T216S:P217A:A219D:F220L:A221E	P1S:A2D:T21S:V27G:E36K:E40G:Q41L:M44L:T45S:K47N:A54P:T75M:N91K:T98K:I100N:K102R:Y103F:V111I:E118A:A119G:G120R:K127T:G132S:T141K:T151S:L155M:M158R:G160C:N162T:R175L:F182Y:S192R:R210S:E212V:L214F:H215N:N222T:E224K:G226E:Y230F:H232D:A233T:K235E:T236S:P237A:A239D:F240L:A241E	pplu	48	19	3.9941967	4.5606937	ATGAGCGATATGAAAATCGAATGTCGCATTAGTGGCACTCTGAACGGCGGAGAGTTCGAGCTCGTAGGCGGGGGCAAGGGCACCCCGGGTCTTGGCCGCCTCTCAAACAACATGAAGTCCACCAAAGGCCCACTGACCTTTTCTCCGTACCTGCTCAGCCACGTTATGGGTTACGGCTTCTATCACTTCGGCATGTACCCCTCCGGTTACGAGAATCCGTTCCTCCACGCTATCAAGAACGGTGGCTACACAAATAAACGCAATGAACGGTTCGAGGACGGCGGCGTCCTTCACATCTCATTCTCATATCGTTATGCAGGACGGCGCGTGATCGGCGACTTCACAGTAGTGGGCACAAGTTTCCCTGAGGACTCAGTCATCTTTAAGGACAAGATCATT…	2	pplu48_37071	G8	3
MPDMKIECRIAGTLNGEEFELVGGGKGNPERGSMSNNMTATKGPLTFSPYLLSHVMGYGFYHFGTYPSDYKNPFLHSVNNGGFTNTRIEEYEDGGVLNISFAYRYEEGRVIGDFKVVGTSFPAASVIFTDNIIRSNASVEHLYPLGDKVLVGAFARTFSLRDGGYYSYVVDSHMHFKCAIHPSILLHGGPMFVFRSVDEHHSSNKLEIVEFQHAFTTPIDLE*	A2D:T10A:V16E:E25K:T27N:Q30R:R32S:T34S:K36N:K38T:S39A:A43P:G68D:E70K:A76S:I77V:Y82F:K89E:H97N:V98I:S101A:A106E:G119S:E122A:D123A:K130N:T137S:H142Y:M144L:N147K:S152A:F167Y:S177C:Q185L:N186H:A192V:R195S:E197D:L199H:N202S:T203N:E204K:G206E:Y210F:K215T:A219D:F220L:A221E	A2D:T21A:V27E:E36K:T38N:Q41R:R43S:T45S:K47N:K49T:S50A:A54P:G79D:E81K:A89S:I90V:Y95F:K102E:H110N:V111I:S114A:A119E:G132S:E135A:D136A:K143N:T151S:H156Y:M158L:N162K:S167A:F182Y:S192C:Q200L:N201H:A207V:R210S:E212D:L214H:N222S:T223N:E224K:G226E:Y230F:K235T:A239D:F240L:A241E	pplu	48	15	4.0679483	4.5854464	ATGCCAGACATGAAAATCGAATGTCGCATTGCCGGCACTCTGAACGGCGAAGAGTTCGAGCTCGTAGGCGGGGGCAAGGGCAATCCGGAACGGGGCAGCATGTCTAACAACATGACCGCGACCAAAGGCCCCCTGACCTTTTCTCCGTACCTGCTCAGCCACGTTATGGGTTACGGCTTCTATCACTTCGGCACGTACCCCTCCGATTACAAAAATCCGTTCCTCCACTCAGTGAACAACGGTGGCTTCACAAATACGCGCATTGAAGAGTACGAGGACGGCGGCGTCCTTAATATCTCATTCGCCTATCGTTATGAGGAAGGTCGCGTGATCGGCGACTTCAAGGTAGTGGGCACATCTTTCCCTGCAGCATCAGTCATCTTTACGGACAACATCATT…	2	pplu48_19647	G9	28
MPVLKIECRITGTLNGVEFELVGRGGGTPELGCMSNNMKSTKGELTFTPYLLSHVMGYGFYHFGMYPSGYENPFFHAVKSGGYTNTRIERYEDGGVLHILFSYRYEAGRVIGDFKVVGASFPDDSVIFTNKIIGSNASVEHLHPMDDKVLVGSFARTFSLRDGGYYSYAVASRMHFKSAIHPSIMENDGPIFAFRSVDEVHSTNELEIAEFQRAFTTSIDYE*	A2V:M3L:G23R:E25G:Q30L:R32C:T34S:K36N:A43E:S47T:T64M:L74F:I77V:N78K:N79S:K89R:V98I:S99L:T118A:G119S:E122D:D129N:R133G:T137S:G145D:N147K:F167Y:V168A:D170A:H172R:L184M:Q185E:G187D:M190I:R195S:E197D:L199V:N202T:T203N:G206E:V208A:Y210F:H212R:K215T:P217S:A219D:F220Y:A221E	A2V:M14L:G34R:E36G:Q41L:R43C:T45S:K47N:A54E:S58T:T75M:L87F:I90V:N91K:N92S:K102R:V111I:S112L:T131A:G132S:E135D:D142N:R147G:T151S:G160D:N162K:F182Y:V183A:D185A:H187R:L199M:Q200E:G202D:M205I:R210S:E212D:L214V:N222T:T223N:G226E:V228A:Y230F:H232R:K235T:P237S:A239D:F240Y:A241E	pplu	48	19	4.0300503	4.5365353	ATGCCAGTCCTGAAAATCGAATGTCGCATTACGGGCACTCTGAACGGCGTGGAGTTCGAGCTCGTAGGCCGTGGCGGCGGCACCCCGGAATTAGGCTGTATGTCGAACAACATGAAGTCCACCAAAGGCGAGCTGACCTTTACACCGTACCTGCTCAGCCACGTTATGGGTTACGGCTTCTATCACTTCGGCATGTACCCCTCCGGTTACGAGAATCCGTTCTTCCACGCTGTCAAGAGTGGTGGCTACACAAATACGCGCATTGAACGCTACGAGGACGGCGGCGTCCTTCACATACTGTTCTCATATCGTTATGAGGCGGGTCGCGTGATCGGCGACTTCAAGGTAGTGGGCGCATCCTTCCCTGATGACTCAGTCATCTTTACGAACAAGATCATT…	2	pplu48_14482	G10	2
MPDLKIECRITGTLNGMEFELVGGGVGAPEQGCMSNNMKSTKGTLTFSPYLLSHVMGYGFYHFGTYPSGFENPFLHAINNGGYTNTRIERYEDGGVLHILLSYRYESGRVIGDFRVEGTSFPEESVIFSNKIIGSNPSVEHLHPVGAKVLVGSFARTFSLRDGGYYSSVAESHMHFKSEIHPSILQDCGPMFVFRSVDELHNSTKLEIVEFQDAFQTHVDVE*	A2D:M3L:V16M:E25V:T27A:R32C:T34S:K36N:A43T:Y69F:K89R:V98I:S99L:F100L:A106S:K114R:V116E:G119S:D123E:T128S:D129N:R133G:A136P:T137S:M144V:D146A:N147K:F167S:V169A:D170E:A178E:N186D:G187C:A192V:R195S:E197D:S201N:N202S:E204K:G206E:Y210F:H212D:K215Q:P217H:I218V:A219D:F220V:A221E	A2D:M14L:V27M:E36V:T38A:R43C:T45S:K47N:A54T:Y80F:K102R:V111I:S112L:F113L:A119S:K127R:V129E:G132S:D136E:T141S:D142N:R147G:A150P:T151S:M158V:D161A:N162K:F182S:V184A:D185E:A193E:N201D:G202C:A207V:R210S:E212D:S221N:N222S:E224K:G226E:Y230F:H232D:K235Q:P237H:I238V:A239D:F240V:A241E	pplu	48	18	3.954175	4.5870624	ATGCCAGATCTTAAAATCGAATGTCGCATTACGGGCACTCTGAACGGCATGGAGTTCGAGCTCGTAGGCGGGGGCGTGGGCGCTCCGGAACAGGGCTGCATGAGTAACAACATGAAGTCCACCAAAGGCACACTGACCTTTTCTCCGTACCTGCTCAGCCACGTTATGGGTTACGGCTTCTATCACTTCGGCACGTACCCCTCCGGTTTCGAGAATCCGTTCCTCCACGCTATCAACAACGGTGGCTACACAAATACGCGCATTGAACGGTACGAGGACGGCGGCGTCCTTCACATTCTGCTTTCATATCGTTATGAGTCGGGTCGCGTGATCGGCGACTTCCGGGTAGAGGGCACATCTTTCCCTGAGGAGTCAGTCATCTTTTCTAATAAGATCATT…	2	pplu48_11049	G11	3
MPDLKIECRITGTLNGLEFELIGGGEGNPELGCMNNNMKSTKGALTFSPYLLSHVMGYGFYHFGTYPSDYENPFLHAIKKGGYTNKRIERYEDGGVLHASFAYCYESRRVIGNFKVEGTCFPKDSLIFTDKIIGSNASVEHLHPMGDNLLVGAFARTFTLRDGGYYSYVVDSRMHFNSAIHPSILQNDGPMFAFRSVDEIHRNSKLEIVEHQDAFKAHTDYE*	A2D:M3L:V16L:V21I:T27N:Q30L:R32C:T34N:K36N:G68D:N78K:N79K:T85K:K89R:V98A:S101A:R103C:A106S:G107R:D112N:V116E:G119C:E122K:V125L:R133G:T137S:V148L:S152A:S158T:F167Y:H172R:K176N:G187D:R195S:E197D:L199I:S201R:T203S:E204K:G206E:Y210H:H212D:T216A:P217H:I218T:A219D:F220Y:A221E	A2D:M14L:V27L:V32I:T38N:Q41L:R43C:T45N:K47N:G79D:N91K:N92K:T98K:K102R:V111A:S114A:R116C:A119S:G120R:D125N:V129E:G132C:E135K:V138L:R147G:T151S:V163L:S167A:S173T:F182Y:H187R:K191N:G202D:R210S:E212D:L214I:S221R:T223S:E224K:G226E:Y230H:H232D:T236A:P237H:I238T:A239D:F240Y:A241E	pplu	48	19	3.9391732	4.6757126	ATGCCAGATCTCAAAATCGAATGTCGCATTACGGGCACTCTGAACGGCCTTGAGTTCGAGCTCATCGGCGGGGGCGAGGGCAACCCGGAATTGGGCTGCATGAACAACAATATGAAGTCCACCAAAGGCGCACTGACCTTTTCTCCGTACCTGCTCAGCCACGTTATGGGTTACGGCTTCTATCACTTCGGCACGTACCCCTCCGATTACGAGAATCCGTTCCTCCACGCTATCAAAAAAGGTGGCTACACAAATAAGCGCATTGAACGCTACGAGGACGGCGGCGTCCTTCACGCATCATTCGCTTATTGCTATGAGTCTCGCCGCGTGATCGGCAACTTCAAGGTAGAAGGCACATGCTTCCCTAAAGACTCACTCATCTTTACGGACAAGATCATT…	2	pplu48_9302	G12	3
MPDVKIECRITGSMNGVEFALEGGGKGTPEQGCMSNKMKSTKGALTFSPYLLSHVMGYGFYHFGTYPSGYENPFLHAINSGGYTNTRIEKYEDGGVLHISFSYRYEAGRVIGNFKLVGTGFPEDSVIFTDKIVGSNASVEHLHPKGDNVLVGTFARTFSLRDGGYYSSVVDSHMDFKSTIHRSILQNGGPMFAFRSVEEHHTNTELEIVEFQDAFKAPIAVA*	A2D:M3V:T12S:L13M:E19A:V21E:E25K:R32C:T34S:N79S:V98I:D112N:V115L:I132V:R133G:T137S:M144K:S152T:F167S:H174D:A178T:P181R:R195S:L199H:S201T:G206E:Y210F:H212D:T216A:F220V	A2D:M14V:T23S:L24M:E30A:V32E:E36K:R43C:T45S:N92S:V111I:D125N:V128L:I145V:R147G:T151S:M158K:S167T:F182S:H189D:A193T:P196R:R210S:L214H:S221T:G226E:Y230F:H232D:T236A:F240V	pplu	30	5	4.2616644	4.5857882	ATGCCAGATGTTAAAATCGAATGTCGCATTACGGGCAGCATGAACGGCGTGGAGTTCGCGCTCGAGGGCGGGGGCAAGGGCACCCCGGAACAGGGCTGCATGTCAAACAAGATGAAGTCCACCAAAGGCGCACTGACCTTTTCTCCGTACCTGCTCAGCCACGTTATGGGTTACGGCTTCTATCACTTCGGCACGTACCCCTCCGGTTACGAGAATCCGTTCCTCCACGCTATCAACAGCGGTGGCTACACAAATACGCGCATTGAAAAGTACGAGGACGGCGGCGTCCTTCACATCTCATTCTCATATCGTTATGAGGCGGGTCGCGTGATCGGCAATTTCAAGCTTGTGGGCACAGGCTTCCCTGAGGACTCAGTCATCTTTACGGACAAGATCGTC…	2	pplu30_743	H1	4
MPAMNIECRIAGTLNGVEFELAGGGEGSPEQGCMSNNMKSTKGPLTFSPYLLSHVMGYGFYHFGTYPSGYVNPFLYAIKNGGYTNTRIEKYEDGGVLHVLFSYRYEARCVIGDFKVEGTSFPEDSVIFTDKIISSNATVEHLHPMGDNVLVGSFARTFSQRNGGYYSYLVDSHMHFKSAIHRSILQNDGPMFAFRSVEEFHSNTELEIVEYQRAFETPTAFE*	K4N:T10A:V21A:T27S:R32C:T34S:K36N:A43P:E70V:H75Y:N78K:S99L:G107R:R108C:V116E:G119S:R133S:L159Q:D161N:F167Y:V168L:P181R:G187D:R195S:L199F:G206E:H212R:K215E:I218T:A221E	K15N:T21A:V32A:T38S:R43C:T45S:K47N:A54P:E81V:H88Y:N91K:S112L:G120R:R121C:V129E:G132S:R147S:L174Q:D176N:F182Y:V183L:P196R:G202D:R210S:L214F:G226E:H232R:K235E:I238T:A241E	pplu	30	18	4.345461	4.5138793	ATGCCAGCCATGAACATCGAATGTCGCATTGCTGGCACTCTGAACGGCGTGGAGTTCGAGCTCGCCGGCGGGGGCGAGGGCTCTCCGGAACAGGGCTGTATGAGCAACAATATGAAGTCCACCAAAGGCCCCCTGACCTTTTCTCCGTACCTGCTCAGCCACGTTATGGGTTACGGCTTCTATCACTTCGGCACGTACCCCTCCGGTTACGTCAATCCGTTCCTCTACGCTATCAAGAACGGTGGCTACACAAATACGCGCATTGAAAAGTACGAGGACGGCGGCGTCCTTCACGTATTGTTCTCATATCGTTATGAGGCGCGCTGCGTGATCGGCGACTTCAAGGTAGAAGGCACAAGTTTCCCTGAGGACTCAGTCATCTTTACGGACAAGATCATT…	2	pplu30_3862	H2	4
MSDVKIECRITGSLNGMEFELVGGGEGAPEQGLMNNNMKSTKGALTFSPYLLSHVMGYGFYHFGTYPSGYKNPFLHAINNGGYTNMRIERYEDGGVLHVSFSYRYEADRVIGDFKVVGTGFPEDSAVFTDKVIRSNASVEHLRPMGNNVLVGSFARTFSLSDGGYYSYVVDSRMHFKSAIHPSILQNGGPMFAFRSVEELHTNTELEIVEYQHAFTRPIDVE*	P1S:A2D:M3V:T12S:V16M:T27A:R32L:T34N:K36N:E70K:T85M:K89R:G107D:V125A:I126V:I131V:T137S:H142R:D146N:R160S:F167Y:H172R:R195S:S201T:G206E:K215T:T216R:A219D:F220V:A221E	P1S:A2D:M14V:T23S:V27M:T38A:R43L:T45N:K47N:E81K:T98M:K102R:G120D:V138A:I139V:I144V:T151S:H156R:D161N:R175S:F182Y:H187R:R210S:S221T:G226E:K235T:T236R:A239D:F240V:A241E	pplu	30	10	4.3215175	4.5227547	ATGAGTGATGTCAAAATCGAATGTCGCATTACGGGCTCACTGAACGGCATGGAGTTCGAGCTCGTAGGCGGGGGCGAGGGCGCTCCGGAACAGGGCTTGATGAACAACAACATGAAGTCCACCAAAGGCGCACTGACCTTTTCTCCGTACCTGCTCAGCCACGTTATGGGTTACGGCTTCTATCACTTCGGCACGTACCCCTCCGGTTACAAGAATCCGTTCCTCCACGCTATCAACAACGGTGGCTACACAAATATGCGCATTGAACGGTACGAGGACGGCGGCGTCCTTCACGTATCATTCTCATATCGTTATGAGGCGGACCGCGTGATCGGCGACTTCAAGGTAGTGGGCACAGGCTTCCCTGAGGACTCAGCAGTTTTTACGGACAAGGTCATT…	2	pplu30_969	H3	4
MPAMKIECRITGSLNGVEFELAGGGAGTPERGCMTNNMRYAKGALTFSPYLLSHVMGYGFYHFGTYPSGFENPFLHAINNGGYTNTRLEKYEDGGVLHASFSYRYEARRVIGDFKVVGTGFPKASVIFTDKIVRSNASVEHLHPVGDNMLAGSFARTFSLRDGRYYSFVVDSHMHFKSAIHPSILQNGGPMFAFRSVDEFHSNTELWIVEYQHAFQKAIALE*	T12S:V21A:E25A:Q30R:R32C:K36N:K38R:S39Y:T40A:Y69F:I87L:V98A:G107R:E122K:D123A:I132V:T137S:M144V:V148M:V150A:G163R:R195S:E197D:L199F:G206W:K215Q:T216K:P217A:F220L:A221E	T23S:V32A:E36A:Q41R:R43C:K47N:K49R:S50Y:T51A:Y80F:I100L:V111A:G120R:E135K:D136A:I145V:T151S:M158V:V163M:V165A:G178R:R210S:E212D:L214F:G226W:K235Q:T236K:P237A:F240L:A241E	pplu	30	20	4.2956967	4.5791106	ATGCCAGCCATGAAAATCGAATGTCGCATTACGGGCTCTCTGAACGGCGTGGAGTTCGAGCTCGCAGGCGGGGGCGCTGGCACCCCGGAACGCGGCTGTATGACCAACAACATGCGGTACGCAAAAGGCGCACTGACCTTTTCTCCGTACCTGCTCAGCCACGTTATGGGTTACGGCTTCTATCACTTCGGCACGTACCCCTCCGGTTTCGAGAATCCGTTCCTCCACGCTATCAACAACGGTGGCTACACAAATACGCGCTTGGAAAAGTACGAGGACGGCGGCGTCCTTCACGCATCATTCTCATATCGTTATGAGGCGCGTCGCGTGATCGGCGACTTCAAGGTAGTGGGCACAGGCTTCCCTAAGGCGTCAGTCATCTTTACGGACAAGATCGTT…	2	pplu30_2906	H4	4
MPTMKIECRITGTLNGAEFELVGGGEGTPEQGCLSNNMKAAKGALTFSPYLLSHVMGYGFYHFGTYPSGYENPFLHAINNGGYTNTRIEKYEDGGVLHASFLYRYEPGRVIGDFKVVGTGFPEDSAIFTDKIIRSNATVEHLHSMGDNVLEGSFARTFSLRDGGYYSYVVESRMDFKSAIHPSILQNAGPMFAFRCVDEHHSNTELGIAEFQDTFKTRVAIE*	A2T:V16A:R32C:M33L:T34S:K36N:S39A:T40A:V98A:S101L:A106P:V125A:P143S:V150E:F167Y:D170E:H172R:H174D:G187A:R195C:E197D:L199H:V208A:Y210F:H212D:A213T:P217R:I218V:F220I:A221E	A2T:V27A:R43C:M44L:T45S:K47N:S50A:T51A:V111A:S114L:A119P:V138A:P157S:V165E:F182Y:D185E:H187R:H189D:G202A:R210C:E212D:L214H:V228A:Y230F:H232D:A233T:P237R:I238V:F240I:A241E	pplu	30	19	4.266842	4.5382376	ATGCCAACAATGAAAATCGAATGTCGCATTACGGGCACTCTGAACGGCGCTGAGTTCGAGCTCGTAGGCGGGGGCGAGGGCACCCCGGAACAGGGCTGTTTATCAAACAACATGAAGGCCGCGAAAGGCGCACTGACCTTTTCTCCGTACCTGCTCAGCCACGTTATGGGTTACGGCTTCTATCACTTCGGCACGTACCCCTCCGGTTACGAGAATCCGTTCCTCCACGCTATCAACAACGGTGGCTACACAAATACGCGCATTGAAAAGTACGAGGACGGCGGCGTCCTTCACGCATCATTCTTGTATCGTTATGAGCCGGGTCGCGTGATCGGCGACTTCAAGGTAGTGGGCACAGGCTTCCCTGAGGACTCAGCGATCTTTACGGACAAGATCATT…	2	pplu30_3253	H5	4
MPAMKIECRITGTLNGVEFELVGGGKGTPEQGLMSNNMKSNKGPLAFSPYLLSHVMGYGFYHFGTYPSDYENPFLQAINNGGYTNTRIEEYEDGGVLHVSFSYRYEEGRVFGDFKVMGTGFPKDSVIFTDKIIGSNATVEHLHPMGDKELVGSFARTFSLRDGGYYSYVVDSHMHFESEIHPSILQNGGPMFAFRSVEEHRTNTELEIVEFQHAFKTAITYE*	E25K:R32L:T34S:K36N:T40N:A43P:T45A:G68D:H75Q:K89E:A106E:I110F:V116M:E122K:R133G:N147K:V148E:F167Y:K176E:A178E:R195S:L199H:H200R:S201T:G206E:Y210F:P217A:A219T:F220Y:A221E	E36K:R43L:T45S:K47N:T51N:A54P:T56A:G79D:H88Q:K102E:A119E:I123F:V129M:E135K:R147G:N162K:V163E:F182Y:K191E:A193E:R210S:L214H:H215R:S221T:G226E:Y230F:P237A:A239T:F240Y:A241E	pplu	30	5	4.2400093	4.524684	ATGCCAGCCATGAAAATCGAATGTCGCATTACGGGCACTCTGAACGGCGTGGAGTTCGAGCTCGTAGGCGGGGGCAAAGGCACCCCGGAACAGGGCCTTATGTCGAACAATATGAAGTCCAATAAAGGCCCGCTGGCTTTTTCTCCGTACCTGCTCAGCCACGTTATGGGTTACGGCTTCTATCACTTCGGCACGTACCCCTCCGATTACGAGAATCCGTTCCTCCAAGCTATCAACAACGGTGGCTACACAAATACGCGCATTGAAGAATACGAGGACGGCGGCGTCCTTCACGTATCATTCTCATATCGTTATGAGGAGGGTCGCGTGTTCGGCGACTTCAAGGTAATGGGCACAGGCTTCCCTAAGGACTCAGTCATCTTTACGGACAAGATCATT…	2	pplu30_1872	H6	4
MPDMKIACRITGTLNGVEFELVGGGKGNPERGHLANNMKPTKGALTFSPYLLSHVMGYGFYHFGTYPSGYANPFLHAIKNGGYTNTRIEKYEDGGVLHVSFSYRYVAGRVIGDFKVVGTGFPEDSVIFTDKIIGSNATVEHLHPLGDNVLVGSFARTFSLRDGGYYSFVVDSLMHFKRAIHPSILENDGPMFVFRSVDEHHSKTKLWIVEFQDAFETPNAFA*	A2D:E6A:E25K:T27N:Q30R:R32H:M33L:T34A:K36N:S39P:E70A:N78K:E105V:R133G:M144L:H172L:S177R:Q185E:G187D:A192V:R195S:E197D:L199H:N202K:E204K:G206W:Y210F:H212D:K215E:I218N	A2D:E17A:E36K:T38N:Q41R:R43H:M44L:T45A:K47N:S50P:E81A:N91K:E118V:R147G:M158L:H187L:S192R:Q200E:G202D:A207V:R210S:E212D:L214H:N222K:E224K:G226W:Y230F:H232D:K235E:I238N	pplu	30	11	4.408874	4.5268145	ATGCCAGATATGAAAATCGCATGTCGCATTACGGGCACTCTGAACGGCGTGGAGTTCGAGCTCGTAGGCGGGGGCAAAGGCAATCCGGAACGGGGCCATCTCGCAAACAACATGAAGCCTACCAAAGGCGCACTGACCTTTTCTCCGTACCTGCTCAGCCACGTTATGGGTTACGGCTTCTATCACTTCGGCACGTACCCCTCCGGTTACGCCAATCCGTTCCTCCACGCTATCAAGAACGGTGGCTACACAAATACGCGCATTGAAAAGTACGAGGACGGCGGCGTCCTTCACGTATCATTCTCATATCGTTATGTGGCGGGTCGCGTGATCGGCGACTTCAAGGTAGTGGGCACAGGCTTCCCTGAGGACTCAGTCATCTTTACGGACAAGATCATT…	2	pplu30_875	H7	3
MPALKIVCRITGTLNGVEFELVGGGEGTPELGCMSNEMKSTKGALTFSPYLLSHVMGYGFYHFGTYPSGYENPFLHAINNGGYTNTRNEKYEDGGVLHLSFSYRYKAGRVIGDFQVVGTSFPKDSVIFKDKIIRSNASVEHFHPMGDKVLVGSFARTFSLRDGGYYSSVADSHMHFKSAIHTSILENDGPMFAYRHVEEHNSNTELEIVEYQRAFKTPIDVE*	M3L:E6V:Q30L:R32C:T34S:K36E:I87N:V98L:E105K:K114Q:G119S:E122K:T128K:T137S:L141F:N147K:F167S:V169A:P181T:Q185E:G187D:F193Y:R195H:L199H:H200N:G206E:H212R:A219D:F220V:A221E	M14L:E17V:Q41L:R43C:T45S:K47E:I100N:V111L:E118K:K127Q:G132S:E135K:T141K:T151S:L155F:N162K:F182S:V184A:P196T:Q200E:G202D:F208Y:R210H:L214H:H215N:G226E:H232R:A239D:F240V:A241E	pplu	30	8	4.231332	4.5169086	ATGCCAGCCCTTAAAATCGTGTGTCGCATTACGGGCACTCTGAACGGCGTGGAGTTCGAGCTCGTAGGCGGGGGCGAGGGCACCCCGGAACTTGGCTGTATGTCTAACGAGATGAAGTCCACCAAAGGCGCACTGACCTTTTCTCCGTACCTGCTCAGCCACGTTATGGGTTACGGCTTCTATCACTTCGGCACGTACCCCTCCGGTTACGAGAATCCGTTCCTCCACGCTATCAACAACGGTGGCTACACAAATACGCGCAATGAAAAGTACGAGGACGGCGGCGTCCTTCACCTTTCATTCTCATATCGTTATAAGGCGGGTCGCGTGATCGGCGACTTCCAGGTAGTGGGCACATCTTTCCCTAAAGACTCAGTCATCTTTAAGGACAAGATCATT…	2	pplu30_1778	H8	3
MPATKIECRITGILNGAVFELVGGGAGSPERGCMSNNMKSTKGALTFSPYLLSHVMGYGFYHFGTYPSGYENPFLHAIINGGYTNTRIEKYEDGGILHISFSYRYKGGRVIGDFKVVGTGFPEDSVIFTDKIIRSNASVEHLHPMGDKLLVGSFARTFSLRDGGYYSSAVDSHMHFKNAIHPSILQTGGPMFAFRCVVEHHTNTELGVVEFQHAFKTPIDFV*	M3T:T12I:V16A:E17V:E25A:T27S:Q30R:R32C:T34S:K36N:N78I:V95I:V98I:E105K:A106G:T137S:N147K:V148L:F167S:V168A:S177N:N186T:R195C:E197V:L199H:S201T:I207V:Y210F:A219D:A221V	M14T:T23I:V27A:E28V:E36A:T38S:Q41R:R43C:T45S:K47N:N91I:V108I:V111I:E118K:A119G:T151S:N162K:V163L:F182S:V183A:S192N:N201T:R210C:E212V:L214H:S221T:I227V:Y230F:A239D:A241V	pplu	30	7	4.260213	4.439411	ATGCCAGCCACCAAAATCGAATGTCGCATTACGGGCATCCTGAACGGCGCTGTTTTCGAGCTCGTAGGCGGGGGCGCAGGCTCGCCGGAACGGGGCTGCATGTCCAACAACATGAAGTCCACCAAAGGCGCACTGACCTTTTCTCCGTACCTGCTCAGCCACGTTATGGGTTACGGCTTCTATCACTTCGGCACGTACCCCTCCGGTTACGAGAATCCGTTCCTCCACGCTATCATTAACGGTGGCTACACAAATACGCGCATTGAAAAGTACGAGGACGGCGGCATACTTCACATTTCATTCTCATATCGTTATAAGGGCGGTCGCGTGATCGGCGACTTCAAGGTAGTGGGCACAGGCTTCCCTGAGGACTCAGTCATCTTTACGGACAAGATCATT…	2	pplu30_2197	H9	7
MPAIKIECRISGTLNGVEFALVGGGEGNPELGCMSNNMKSTKGALTFSPYLLSHVMGYGFYHFGMYPPGYENPFLHAINNGGYTNTRIETYEDGGVLHVSFSYRYEAGRVIGDFKVVGTGFPEDSVIFADKIIRSNATVEHLHPRDDKVLVGSFARTFSLRDGGYYSYVVDSQMHFKSAIHPSILQNDGPMFAFRRVEEFHSITVLRILEFQHTFTRPIDYE*	M3I:T10S:E19A:T27N:Q30L:R32C:T34S:K36N:T64M:S67P:K89T:T128A:M144R:G145D:N147K:F167Y:H172Q:G187D:L199F:N202I:E204V:G206R:V208L:Y210F:A213T:K215T:T216R:A219D:F220Y:A221E	M14I:T21S:E30A:T38N:Q41L:R43C:T45S:K47N:T75M:S78P:K102T:T141A:M158R:G160D:N162K:F182Y:H187Q:G202D:L214F:N222I:E224V:G226R:V228L:Y230F:A233T:K235T:T236R:A239D:F240Y:A241E	pplu	30	11	4.2828693	4.5867667	ATGCCAGCCATAAAAATCGAATGTCGCATTTCGGGCACTCTGAACGGCGTGGAGTTCGCCCTCGTAGGCGGGGGCGAGGGCAATCCGGAACTTGGCTGCATGAGCAACAACATGAAGTCCACCAAAGGCGCACTGACCTTTTCTCCGTACCTGCTCAGCCACGTTATGGGTTACGGCTTCTATCACTTCGGCATGTACCCCCCTGGTTACGAGAATCCGTTCCTCCACGCTATCAACAACGGTGGCTACACAAATACGCGCATTGAAACGTACGAGGACGGCGGCGTCCTTCACGTATCATTCTCATATCGTTATGAGGCGGGTCGCGTGATCGGCGACTTCAAGGTAGTGGGCACAGGCTTCCCTGAGGACTCAGTCATCTTTGCTGACAAGATCATT…	2	pplu30_1629	H10	6
MPAMKIECRITGTLNDAEFELVGGGDGAPGLGRLTNNMKSTKGPLTFSPYLLSHVMGYGFYHFGTYPSGYENPFLHAINNGGYTNTRIEKYEDGGVLHVSFAYRYEAGRVIGDFKVGGTSFPKDSVIFTDKIISSNATVEHLRPMGNNVLVGSFARTFSLRDGGYYSYVVDSQMHFKSAIHPSILENGGPMFAFRRVDEHHRNTKLEIVEHQHSFERPIDFE*	G15D:V16A:E25D:T27A:E29G:Q30L:M33L:K36N:A43P:S101A:V116G:G119S:E122K:R133S:H142R:D146N:F167Y:H172Q:Q185E:E197D:L199H:S201R:E204K:G206E:Y210H:A213S:K215E:T216R:A219D:A221E	G26D:V27A:E36D:T38A:E40G:Q41L:M44L:K47N:A54P:S114A:V129G:G132S:E135K:R147S:H156R:D161N:F182Y:H187Q:Q200E:E212D:L214H:S221R:E224K:G226E:Y230H:A233S:K235E:T236R:A239D:A241E	pplu	30	13	4.330377	4.634469	ATGCCAGCCATGAAAATCGAATGTCGCATTACGGGCACTCTGAACGACGCCGAGTTCGAGCTCGTAGGCGGGGGCGACGGCGCCCCGGGGTTGGGCCGCTTGACCAACAATATGAAGTCCACCAAAGGCCCGCTGACCTTTTCTCCGTACCTGCTCAGCCACGTTATGGGTTACGGCTTCTATCACTTCGGCACGTACCCCTCCGGTTACGAGAATCCGTTCCTCCACGCTATCAACAACGGTGGCTACACAAATACGCGCATTGAAAAGTACGAGGACGGCGGCGTCCTTCACGTATCATTCGCCTATCGTTATGAGGCGGGTCGCGTGATCGGCGACTTCAAGGTAGGGGGCACAAGCTTCCCTAAAGACTCAGTCATCTTTACGGACAAGATCATT…	2	pplu30_1511	H11	3
MPAMKIECRITGTLNGVEFELVGGGKGNPEQGCMTNNMKSTKGALTFTPYLLSHVMGYGFYHFGTYPSGFKNPFLHAIKNGGYTNTRIEKYEDGGVLYVSFSYRYESDRVIGDFKVVGTSFPKASVIFTDKIIRSNASVEHLHPMGDNVLAGSFARTFSLRDGGYYSCVVDSRMHFKRAIHPSILQNDGPMFAFRCVVEFHRNTKLWIVEHQHTFQTPIDFA*	E25K:T27N:R32C:K36N:S47T:Y69F:E70K:N78K:H97Y:A106S:G107D:G119S:E122K:D123A:T137S:V150A:F167C:H172R:S177R:G187D:R195C:E197V:L199F:S201R:E204K:G206W:Y210H:A213T:K215Q:A219D	E36K:T38N:R43C:K47N:S58T:Y80F:E81K:N91K:H110Y:A119S:G120D:G132S:E135K:D136A:T151S:V165A:F182C:H187R:S192R:G202D:R210C:E212V:L214F:S221R:E224K:G226W:Y230H:A233T:K235Q:A239D	pplu	30	12	4.5550346	4.665832	ATGCCAGCCATGAAAATCGAATGTCGCATTACGGGCACTCTGAACGGCGTGGAGTTCGAGCTCGTAGGCGGGGGCAAAGGCAATCCGGAACAGGGCTGCATGACCAACAACATGAAGTCCACCAAAGGCGCACTGACCTTTACGCCGTACCTGCTCAGCCACGTTATGGGTTACGGCTTCTATCACTTCGGCACGTACCCCTCCGGTTTTAAGAATCCGTTCCTCCACGCTATCAAGAACGGTGGCTACACAAATACGCGCATTGAAAAGTACGAGGACGGCGGCGTCCTTTACGTATCATTCTCATATCGTTATGAGAGTGATCGCGTGATCGGCGACTTCAAGGTAGTGGGCACATCCTTCCCTAAGGCATCAGTCATCTTTACGGACAAGATCATT…	2	pplu30_1400	H12	42
MTELTEGAKLFEKEIPYITELEGDVEGMKFIIKGVGTGDATTGTIKAKYICTTGYLPVPWATILSSLSYGVFCFAKYPPHIADFFKSTQPDGYTQDRTITFDNDGEYDVKAKVTYENGTLYNRVNVKGTGFNSNGNILGMRVLHHSPPHSVYILPDRKNGGMRIEYNKAFDVMGGDHQMARHAQFNRPLGAWVEDYPLYHHLTVWTSFGKDPDDDDTDHLKIVEVIKAVDLETYR*	A2E:E34V:D54Y:R78P:S93T:I97T:S99T:Q105E:T124N:K131N:Y143H:A149S:K162R:G175D:K186R:E192V:E215D:T220K	A2E:E34V:D54Y:R78P:S96T:I100T:S102T:Q108E:T127N:K134N:Y146H:A152S:K165R:G178D:K189R:E195V:E221D:T226K	cgre	18	6	5.5435476	5.4632807	ATGACTGAGCTTACCGAAGGCGCGAAGCTGTTCGAAAAAGAGATTCCCTATATCACCGAGCTGGAGGGCGACGTAGAGGGCATGAAGTTCATCATTAAGGGCGTTGGCACTGGCGATGCCACCACGGGCACCATCAAGGCGAAGTACATCTGCACCACCGGCTACCTGCCCGTGCCCTGGGCTACCATCCTGTCATCCCTGTCGTACGGCGTGTTTTGCTTCGCTAAATACCCCCCACACATTGCGGACTTCTTCAAGTCCACCCAACCCGATGGCTACACTCAGGACCGCACTATCACATTCGACAATGACGGCGAATACGACGTGAAAGCCAAAGTGACGTATGAGAACGGTACACTATACAACCGCGTTAATGTGAAGGGCACTGGTTTCAACTCA…	3	cgre18_2601	A1	47
MTAPTVGAKLFEEEIPYITELEGDVEGMKFIIKGEGTGDATTGTIKAKYICTTGDLPVPWATILSSLSYGVFCFAQYPRHIADFFKSTQPDGYSQDRIISFDDDGQYNVKAKVTFENGTLFNRVIVKGTGFNSNGNILGMRVLHHSPPHAVYILPDRKNGGLKIEYNMAFELMGGGHQMARHAQFNKPLGAWVEDYPLYHHLTVWTSCGKDPDDDETDHLKIVEVIKAVDLETYR*	L3P:E5V:K12E:K75Q:N102D:D107N:Y114F:Y120F:T124I:K131N:Y143H:M161L:K167M:D170E:V171L:E192V:F207C:T220K	L3P:E5V:K12E:K75Q:N105D:D110N:Y117F:Y123F:T127I:K134N:Y146H:M164L:K170M:D173E:V174L:E195V:F213C:T226K	cgre	18	5	5.538162	5.072154	ATGACTGCACCTACCGTAGGCGCGAAGCTGTTCGAAGAGGAGATTCCCTATATCACCGAGCTGGAGGGCGACGTAGAGGGCATGAAGTTCATCATTAAGGGCGAGGGCACTGGCGATGCCACCACGGGCACCATCAAGGCGAAGTACATCTGCACCACCGGCGACCTGCCCGTGCCCTGGGCTACCATCCTGTCATCCCTGTCGTACGGCGTGTTTTGCTTCGCTCAGTACCCCCGCCACATTGCGGACTTCTTCAAGTCCACCCAACCCGATGGCTACAGTCAGGACCGCATCATCTCGTTCGACGACGACGGCCAGTACAACGTGAAAGCCAAAGTGACGTTCGAGAACGGTACACTATTCAACCGCGTTATCGTGAAGGGCACTGGTTTCAACTCA…	3	cgre18_2786	B1	173
MTELTGGAKLFDKEIPYITELEGDVEGMKFIIKGEGTGDATTGTIKAKYICTTGDMPVPWATLLSSLSYGVFCFAKYPRHIVDFFKSTQPDGYTQDRIISFDNDGQYDVKAKVTYENGTLYNRVNVKGTGFKLNGNILGMRVLYHSPPHVVYVLPDRKNGGLKIEYNKAFDVMGGGHQMARHTQFNKPLGAWEDDYPQYHHLTVWTSFGKDPDDDKTDHLKIVEVIKAIDLETYR*	A2E:E5G:E11D:L55M:I62L:A81V:S93T:T124N:S132L:A149V:I152V:M161L:A182T:E193D:L197Q:E215K:T220K:V228I	A2E:E5G:E11D:L55M:I62L:A81V:S96T:T127N:S135L:A152V:I155V:M164L:A185T:E196D:L203Q:E221K:T226K:V234I	cgre	18	6	5.448579	5.3324685	ATGACTGAGCTTACCGGAGGCGCGAAGCTGTTCGACAAAGAGATTCCCTATATCACCGAGCTGGAGGGCGACGTAGAGGGCATGAAGTTCATCATTAAGGGCGAGGGCACTGGCGATGCCACCACGGGCACCATCAAGGCGAAGTACATCTGCACCACCGGCGACATGCCCGTGCCCTGGGCTACCTTGCTGTCATCCCTGTCGTACGGCGTGTTTTGCTTCGCTAAATACCCCCGCCACATTGTAGACTTCTTCAAGTCCACCCAACCCGATGGCTACACCCAGGACCGCATCATCTCGTTCGACAATGACGGCCAGTACGACGTGAAAGCCAAAGTGACGTATGAGAACGGTACACTATACAACCGCGTTAATGTGAAGGGCACTGGTTTCAAGTTA…	3	cgre18_2880	C1	232
MTPLPEGAKLFEKEIPYITELEGDVEGMKFTIKGVGTGDATTGTIKAKYICTTGVLPVPWATILSSLSYGVFCFAKYPRHIVDFFKSTQPDGYTQDRIITFDNDGQYDVKAKVTYENGKLYNRVTVKGTGFKTNGNILGMRVLYHSPPHAVYIMPDRKNGGMKIEYNMAFEVMGGDHQMARHSQFNKPLGAWVEDYPMYHHLTVWTSVGKDPDDDETDHLTIVEVIKAVDLETYR*	A2P:T4P:I30T:E34V:D54V:A81V:S93T:S99T:T118K:S132T:L153M:K167M:D170E:G175D:A182S:E192V:L197M:F207V	A2P:T4P:I30T:E34V:D54V:A81V:S96T:S102T:T121K:S135T:L156M:K170M:D173E:G178D:A185S:E195V:L203M:F213V	cgre	18	3	5.523106	5.2940474	ATGACTCCGCTTCCCGAAGGCGCGAAGCTGTTCGAAAAAGAGATTCCCTATATCACCGAGCTGGAGGGCGACGTAGAGGGCATGAAGTTCACAATTAAGGGCGTCGGCACTGGCGATGCCACCACGGGCACCATCAAGGCGAAGTACATCTGCACCACCGGCGTTCTGCCCGTGCCCTGGGCTACCATCCTGTCATCCCTGTCGTACGGCGTGTTTTGCTTCGCTAAATACCCCCGCCACATTGTTGACTTCTTCAAGTCCACCCAACCCGATGGCTACACTCAGGACCGCATCATCACCTTCGACAATGACGGCCAGTACGACGTGAAAGCCAAAGTGACGTATGAGAACGGTAAGCTATACAACCGCGTTACCGTGAAGGGCACTGGTTTCAAGACA…	3	cgre18_3158	D1	43
MTELTGGEKLFDKEIPYITELDGDVEGMKFIIKGVGTGDATTGTIKAKYICTTGELPVPWATILSSLSYGVFCFAKYPPHIVDFFKSTQPDGYSQDRIISFDNDGQYDVKAKVTYENGTLYNRVTVKGTGFKSKGNILGKRILYHSPPHAVYILPDRKNGGMKIEYNKAFEVLGGGHQMARHSQFNKPLGAWEEDYPLYHHLTVWTSCGKDPDDDDTDHLKIVEVIKAVDLETYR*	A2E:E5G:A7E:E11D:E21D:E34V:D54E:R78P:A81V:N133K:M139K:V141I:D170E:M172L:A182S:F207C:E215D:T220K	A2E:E5G:A7E:E11D:E21D:E34V:D54E:R78P:A81V:N136K:M142K:V144I:D173E:M175L:A185S:F213C:E221D:T226K	cgre	18	6	5.6301413	5.4746766	ATGACTGAGCTTACCGGAGGCGAGAAGCTGTTCGACAAAGAGATTCCCTATATCACCGAGCTGGATGGCGACGTAGAGGGCATGAAGTTCATCATTAAGGGCGTGGGCACTGGCGATGCCACCACGGGCACCATCAAGGCGAAGTACATCTGCACCACCGGCGAGCTGCCCGTGCCCTGGGCTACCATCCTGTCATCCCTGTCGTACGGCGTGTTTTGCTTCGCTAAATACCCCCCGCACATTGTAGACTTCTTCAAGTCCACCCAACCCGATGGCTACAGTCAGGACCGCATCATCTCGTTCGACAATGACGGCCAGTACGACGTGAAAGCCAAAGTGACGTATGAGAACGGTACACTATACAACCGCGTTACCGTGAAGGGCACTGGTTTCAAGTCA…	3	cgre18_3224	E1	204
MAELTGGAKLFEEEIPYITELEGDVEGMKFIIKGEGTGDATTGTIKAKYICTTGELPVPWATILSSLSYGVFCFAKYPRHIADFFKSTQPDGYSQDRIISFDNDGQFDVKAKVTYENGTLYNRVIMKGTGFKSNGNILGMRVLYHSPPHVVYVLPDRENGGMKIEYNMAFDVMGGDHQMARHAQFNKPLGAWVEDYPLYHHLTVWTSVGKDADDDETDHLKIIEVIKAVDLETYR*	T1A:A2E:E5G:K12E:D54E:Y106F:T124I:V125M:A149V:I152V:K157E:K167M:G175D:E192V:F207V:P211A:T220K:V222I	T1A:A2E:E5G:K12E:D54E:Y109F:T127I:V128M:A152V:I155V:K160E:K170M:G178D:E195V:F213V:P217A:T226K:V228I	cgre	18	5	5.4176946	5.4135256	ATGGCGGAGCTTACCGGTGGCGCGAAGCTGTTCGAAGAGGAGATTCCCTATATCACCGAGCTGGAGGGCGACGTAGAGGGCATGAAGTTCATCATTAAGGGCGAGGGCACTGGCGATGCCACCACGGGCACCATCAAGGCGAAGTACATCTGCACCACCGGCGAGCTGCCCGTGCCCTGGGCTACCATCCTGTCATCCCTGTCGTACGGCGTGTTTTGCTTCGCTAAATACCCCCGCCACATTGCGGACTTCTTCAAGTCCACCCAACCCGATGGCTACAGTCAGGACCGCATCATCTCGTTCGACAATGACGGCCAGTTTGACGTGAAAGCCAAAGTGACGTATGAGAACGGTACACTATACAACCGCGTTATTATGAAGGGCACTGGTTTCAAGTCA…	3	cgre18_3623	F1	66
MTELPVGAKLFEKEIPYITELEGDVEGMKFTIKGEGTGDATTGTIKAKYICTTGEMPVPWATILSSLSYGVFCFAKYPPHIADFFKSTQPDGYSQDRTISFDNDGEYDVKAKVTYEKGTLYNRVTVKGTGFKSKGNILGMRVLYHSPPHVVYILPDRNNGGMKIEYNKAFDVMGGGHQMARHAQFNKPLGVWEDDYPPYHHLTVWTSFGKDPDDDDTDHLTIVEVIKAVDLETYS*	A2E:T4P:E5V:I30T:D54E:L55M:R78P:I97T:Q105E:N116K:N133K:A149V:K157N:A190V:E193D:L197P:E215D:R234S	A2E:T4P:E5V:I30T:D54E:L55M:R78P:I100T:Q108E:N119K:N136K:A152V:K160N:A193V:E196D:L203P:E221D:R245S	cgre	18	9	5.514503	5.3371906	ATGACTGAGCTTCCCGTCGGCGCGAAGCTGTTCGAAAAAGAGATTCCCTATATCACCGAGCTGGAGGGCGACGTAGAGGGCATGAAGTTCACAATTAAGGGCGAGGGCACTGGCGATGCCACCACGGGCACCATCAAGGCGAAGTACATCTGCACCACCGGCGAAATGCCCGTGCCCTGGGCTACCATCCTGTCATCCCTGTCGTACGGCGTGTTTTGCTTCGCTAAATACCCCCCGCACATTGCGGACTTCTTCAAGTCCACCCAACCCGATGGCTACAGTCAGGACCGCACAATCTCGTTCGACAATGACGGCGAATACGACGTGAAAGCCAAAGTGACGTATGAGAAAGGTACACTATACAACCGCGTTACCGTGAAGGGCACTGGTTTCAAGTCA…	3	cgre18_4217	G1	51
MTERPKGEKLFEKEIPYITELEGDVEGMKFIIKGEGTGDATTGTIKAKYICTTGDLPVPWATILSSLSYGVFCFAKYPRHIADFFKSTQPDGYTQDRIITFDNDGKYDVKAKVTYENGTLYNRVNLKGTGFNSKGNILGMRVSYHSPPHVVYILPDRKNGGMKIEYNMVFDVMGGGHQMARHTQFNKPLGAWEEDYPPYHHLTVWTSFGKDPDDDETDHLTIVEVIKAVDLETYR*	A2E:L3R:T4P:E5K:A7E:S93T:S99T:Q105K:T124N:V125L:K131N:N133K:L142S:A149V:K167M:A168V:A182T:L197P	A2E:L3R:T4P:E5K:A7E:S96T:S102T:Q108K:T127N:V128L:K134N:N136K:L145S:A152V:K170M:A171V:A185T:L203P	cgre	18	6	5.991682	5.317232	ATGACTGAGCGCCCCAAAGGCGAAAAGCTGTTCGAAAAAGAGATTCCCTATATCACCGAGCTGGAGGGCGACGTAGAGGGCATGAAGTTCATCATTAAGGGCGAGGGCACTGGCGATGCCACCACGGGCACCATCAAGGCGAAGTACATCTGCACCACCGGCGACCTGCCCGTGCCCTGGGCTACCATCCTGTCATCCCTGTCGTACGGCGTGTTTTGCTTCGCTAAATACCCCCGCCACATTGCGGACTTCTTCAAGTCCACCCAACCCGATGGCTACACGCAGGACCGCATCATCACGTTCGACAATGACGGCAAGTACGACGTGAAAGCCAAAGTGACGTATGAGAACGGTACACTATACAACCGCGTTAACCTCAAGGGCACTGGTTTCAACTCA…	3	cgre18_4336	H1	103
MTALTVGAKLFVEEIPYVTELEGDVEGMKFIVKGVGTGDATTGTIKAKYICTTGELPVPWATILSSLSYGVFCFAKYPRHIADFFKSTQPDGYSQDRIISFDNDGQYDVKAKVTYENGKLYNRANVKGTGFNSNGNILGMRVSYHSPPHAVYILPDRNNGGMKIEYNKAFELMGGGHQMARHAQFNKPLGVWEEDYPLYHHLTVWTSVGKDPDDDDTDHLTIVEVIKAVDLETYR*	E5V:E11V:K12E:I17V:I31V:E34V:D54E:T118K:V123A:T124N:K131N:L142S:K157N:D170E:V171L:A190V:F207V:E215D	E5V:E11V:K12E:I17V:I31V:E34V:D54E:T121K:V126A:T127N:K134N:L145S:K160N:D173E:V174L:A193V:F213V:E221D	cgre	18	5	5.618364	5.4653645	ATGACTGCACTTACCGTGGGCGCGAAGCTGTTCGTTGAGGAGATTCCCTATGTGACCGAGCTGGAGGGCGACGTAGAGGGCATGAAGTTCATCGTTAAGGGCGTAGGCACTGGCGATGCCACCACGGGCACCATCAAGGCGAAGTACATCTGCACCACCGGCGAACTGCCCGTGCCCTGGGCTACCATCCTGTCATCCCTGTCGTACGGCGTGTTTTGCTTCGCTAAATACCCCCGCCACATTGCGGACTTCTTCAAGTCCACCCAACCCGATGGCTACAGTCAGGACCGCATCATCTCGTTCGACAATGACGGCCAGTACGACGTGAAAGCCAAAGTGACGTATGAGAACGGTAAACTATACAACCGCGCTAATGTGAAGGGCACTGGTTTCAATTCA…	3	cgre18_4734	A2	24
MTELTEGAKLFDKEIPYVTELEGDVEGMKFIIKGEGTGDATTGTIKAKYICTTGVLPVPWATILSSLSYGVFCFAQSPRHIVDFFKSTQPDGYSQDRIITFDNDGQYDVKAKVTYENGTLYNRVTMKGTGFKSNGNILGMRVLHHSPPHVVYILPDRKNGGMKIEYNMVFGVMGGGHQMARHAQFNKPLGAWEEVYPQYHHLTVWTSCGKDPDDDDTDHLTIVEVIKAVDLETYR*	A2E:E11D:I17V:D54V:K75Q:Y76S:A81V:S99T:V125M:Y143H:A149V:K167M:A168V:D170G:D194V:L197Q:F207C:E215D	A2E:E11D:I17V:D54V:K75Q:Y76S:A81V:S102T:V128M:Y146H:A152V:K170M:A171V:D173G:D197V:L203Q:F213C:E221D	cgre	18	13	5.7117524	5.2254186	ATGACTGAGCTTACCGAAGGCGCGAAGCTGTTCGACAAAGAGATTCCCTATGTGACCGAGCTGGAGGGCGACGTAGAGGGCATGAAGTTCATCATTAAGGGCGAGGGCACTGGCGATGCCACCACGGGCACCATCAAGGCGAAGTACATCTGCACCACCGGCGTTCTGCCCGTGCCCTGGGCTACCATCCTGTCATCCCTGTCGTACGGCGTGTTTTGCTTCGCTCAATCTCCCCGCCACATTGTGGACTTCTTCAAGTCCACCCAACCCGATGGCTACAGTCAGGACCGCATCATCACTTTCGACAATGACGGCCAGTACGACGTGAAAGCCAAAGTGACGTATGAGAACGGTACACTATACAACCGCGTTACCATGAAGGGCACTGGTTTCAAGTCA…	3	cgre18_5266	B2	191
MPALPGGAKLFEKEIPYVTELEGDVEGMKFIIKGVGTGDATTGTIKAKYICTTGDLPVPWATILSSLSYGVFCFAKYPLHIPDFFKSTQPDGYSQDRIISFDNDGQYDVKAKVTYENGTLYNRVIVKGTGFKSNGNILGMRVLHRSPPHVVYILPDRRNGGMMIEYNKAFDVLGGGHQMARHSQFNKPLGVWEEEYPPYHHLTVWTSFGKDPDDDETDHLTIVEVIKAVDLETYR*	T1P:T4P:E5G:I17V:E34V:R78L:A81P:T124I:Y143H:H144R:A149V:K157R:K162M:M172L:A182S:A190V:D194E:L197P	T1P:T4P:E5G:I17V:E34V:R78L:A81P:T127I:Y146H:H147R:A152V:K160R:K165M:M175L:A185S:A193V:D197E:L203P	cgre	18	7	5.692928	5.0702057	ATGCCTGCACTTCCGGGAGGCGCGAAGCTGTTCGAAAAAGAGATTCCCTATGTCACCGAGCTGGAGGGCGACGTAGAGGGCATGAAGTTCATCATTAAGGGCGTTGGCACTGGCGATGCCACCACGGGCACCATCAAGGCGAAGTACATCTGCACCACCGGCGACCTGCCCGTGCCCTGGGCTACCATCCTGTCATCCCTGTCGTACGGCGTGTTTTGCTTCGCTAAATACCCCCTTCACATTCCGGACTTCTTCAAGTCCACCCAACCCGATGGCTACAGTCAGGACCGCATCATCTCGTTCGACAATGACGGCCAGTACGACGTGAAAGCCAAAGTGACGTATGAGAACGGTACACTATACAACCGCGTTATCGTGAAGGGCACTGGTTTCAAGTCA…	3	cgre18_5520	C2	86
MTSPPGGAKLFEKEIPYITELEGDVEGMKFTIKGVGTGDATTGTIKAKYICTTGDMPVPWATILSSLSYGVFCFAKYPPHIADFFKSTQPDGYSQDRIISFDDDGQYDVKAKVTYENGTLYNRVTMKGTGFNSNGNILGMRVMYHSPPHAVYILPDRKNGGLKIEYNMAFVVLGGGHQMARHAQFNKPLGAWEEDYPLYHHLTVWTSFGKDPDDGDTDHLTIVEVIKAVDLETYR*	A2S:L3P:T4P:E5G:I30T:E34V:L55M:R78P:N102D:V125M:K131N:L142M:M161L:K167M:D170V:M172L:D214G:E215D	A2S:L3P:T4P:E5G:I30T:E34V:L55M:R78P:N105D:V128M:K134N:L145M:M164L:K170M:D173V:M175L:D220G:E221D	cgre	18	10	5.559788	5.336273	ATGACTTCTCCCCCAGGAGGCGCGAAGCTGTTCGAAAAAGAGATTCCCTATATCACCGAGCTGGAGGGCGACGTAGAGGGCATGAAGTTCACTATTAAGGGCGTGGGCACTGGCGATGCCACCACGGGCACCATCAAGGCGAAGTACATCTGCACCACCGGCGACATGCCCGTGCCCTGGGCTACCATCCTGTCATCCCTGTCGTACGGCGTGTTTTGCTTCGCTAAATACCCCCCGCACATTGCGGACTTCTTCAAGTCCACCCAACCCGATGGCTACAGTCAGGACCGCATCATCTCGTTCGACGATGACGGCCAGTACGACGTGAAAGCCAAAGTGACGTATGAGAACGGTACACTATACAACCGCGTTACCATGAAGGGCACTGGTTTCAACTCA…	3	cgre18_5630	D2	51
MTAPSEGAKLFEEEIPYVTELEGDVEGMKFIIKGVGTGDAATGTIKAKYTCTTGELPVPWATILSSLSYGVFCFAKYPPHIADFFKSTQPDGYSQDRIISFDNDGQYDVRAKVTYEDGTLYNRVNVKGTGFKSKGNILGMRILYHSPAHAVYVLPDHKNGGMKIEYNMAFEVMGGGHQMARHSQFNRPLGAWEEEYPLYHHLTVWTSFGKDPDDDDTDHLTIVEVIKAVDLESYR*	L3P:T4S:K12E:I17V:E34V:T40A:I49T:D54E:R78P:K109R:N116D:T124N:N133K:V141I:P147A:I152V:R156H:K167M:D170E:A182S:K186R:D194E:E215D:T232S	L3P:T4S:K12E:I17V:E34V:T40A:I49T:D54E:R78P:K112R:N119D:T127N:N136K:V144I:P150A:I155V:R159H:K170M:D173E:A185S:K189R:D197E:E221D:T243S	cgre	24	5	5.927383	5.579407	ATGACTGCACCTAGCGAAGGCGCGAAGCTGTTCGAAGAAGAGATTCCCTATGTGACCGAGCTGGAGGGCGACGTAGAGGGCATGAAGTTCATCATTAAGGGCGTTGGCACTGGCGATGCCGCTACGGGCACCATCAAGGCGAAGTACACGTGCACCACCGGCGAGCTGCCCGTGCCCTGGGCTACCATCCTGTCATCCCTGTCGTACGGCGTGTTTTGCTTCGCTAAATACCCCCCCCACATTGCGGACTTCTTCAAGTCCACCCAACCCGATGGCTACAGTCAGGACCGCATCATCTCGTTCGACAATGACGGCCAGTACGACGTGCGCGCCAAAGTGACGTATGAGGACGGTACACTATACAACCGCGTTAACGTGAAGGGCACTGGTTTCAAGTCA…	3	cgre24_377	E2	219
MTEPPVGAMLFDKEIPYITELEGDVEGMKFTIKGEGTGDATTGTIKAKYICTTGVLPVPWASILSSLSYGVFCFAKYPPHIADFFKSTQPDGYSQDRTISFDNDGQYDVRAKVTFEDGTLYNRVTVKGTGFNSNGNILGMRISYHSPPHVVYILPDHKNGGMKIEYNKAFGVMGGGHQMARHAQFNKPLGVWEEDYPPYHHLTVWTSFGKDPDDGDTDHLTIVEVIKAVDLETYR*	A2E:L3P:T4P:E5V:K8M:E11D:I30T:D54V:T61S:R78P:I97T:K109R:Y114F:N116D:K131N:V141I:L142S:A149V:R156H:D170G:A190V:L197P:D214G:E215D	A2E:L3P:T4P:E5V:K8M:E11D:I30T:D54V:T61S:R78P:I100T:K112R:Y117F:N119D:K134N:V144I:L145S:A152V:R159H:D173G:A193V:L203P:D220G:E221D	cgre	24	14	5.951183	5.4844728	ATGACTGAACCACCAGTCGGCGCGATGCTGTTCGATAAAGAGATTCCCTATATCACCGAGCTGGAGGGCGACGTAGAGGGCATGAAGTTCACGATTAAGGGCGAGGGCACTGGCGATGCCACCACGGGCACCATCAAGGCGAAGTACATCTGCACCACCGGCGTACTGCCCGTGCCCTGGGCTAGTATCCTGTCATCCCTGTCGTACGGCGTGTTTTGCTTCGCTAAATACCCCCCACACATTGCGGACTTCTTCAAGTCCACCCAACCCGATGGCTACAGTCAGGACCGCACCATCTCGTTCGACAATGACGGCCAGTACGACGTGCGGGCCAAAGTGACGTTCGAGGACGGTACACTATACAACCGCGTTACCGTGAAGGGCACTGGTTTCAACTCA…	3	cgre24_1503	F2	164
MTAPPVGAKLFEEEIPYITELEGDVEGMKFTIKGEGTGDATTGTIKAKYTCTTGGMPVPWATILSSLSYGVFCFAKYPPHIVDFFKSTQPDGYSQDRIITFDNDGQYDVKAKVTYENGTLYNRVAVKGTGFNPNGNILGMRVLYRSPPHAVYILPDHKNGGMKIEYNMAFGIMGGDHQMARHAQFNKPLGAWEDVYPLYHHLTVWTSVGKDPDDDDTDHLTIVEVIKAVDLETYR*	L3P:T4P:E5V:K12E:I30T:I49T:D54G:L55M:R78P:A81V:S99T:T124A:K131N:S132P:H144R:R156H:K167M:D170G:V171I:G175D:E193D:D194V:F207V:E215D	L3P:T4P:E5V:K12E:I30T:I49T:D54G:L55M:R78P:A81V:S102T:T127A:K134N:S135P:H147R:R159H:K170M:D173G:V174I:G178D:E196D:D197V:F213V:E221D	cgre	24	13	5.4291735	5.343252	ATGACTGCACCTCCCGTGGGCGCGAAGCTGTTCGAAGAAGAGATTCCCTATATCACCGAGCTGGAGGGCGACGTAGAGGGCATGAAGTTCACAATTAAGGGCGAGGGCACTGGCGATGCCACCACGGGCACCATCAAGGCGAAGTACACATGCACCACCGGCGGAATGCCCGTGCCCTGGGCTACCATCCTGTCATCCCTGTCGTACGGCGTGTTTTGCTTCGCTAAATACCCCCCCCACATTGTCGACTTCTTCAAGTCCACCCAACCCGATGGCTACAGTCAGGACCGCATCATCACTTTCGACAATGACGGCCAGTACGACGTGAAAGCCAAAGTGACGTATGAGAACGGTACACTATACAACCGCGTTGCCGTGAAGGGCACTGGTTTCAATCCG…	3	cgre24_1493	G2	6
MTELTEGAKLFDKEIPYITELEGDVEGMKFIINGVGTGDATTGTIKAKYICTTGELPVPWATILSSLSYGVFCFAKYPRHIADFFKSTQPDGYTQDRIISFDDDGQYDVKAKVTYENGALYNRVALKGTGFKSNGNILGMRVSYRSPPHVVYILPDRKNGGVMIEYNMVFDVMGGDHQMARHAQFNKPLGAWVDDYPLYHHLTVWTCVGKDADDDETDHLKIVEVIKAVDLETYR*	A2E:E11D:K32N:E34V:D54E:S93T:N102D:T118A:T124A:V125L:L142S:H144R:A149V:M161V:K162M:K167M:A168V:G175D:E192V:E193D:S206C:F207V:P211A:T220K	A2E:E11D:K32N:E34V:D54E:S96T:N105D:T121A:T127A:V128L:L145S:H147R:A152V:M164V:K165M:K170M:A171V:G178D:E195V:E196D:S212C:F213V:P217A:T226K	cgre	24	8	5.5618668	5.5583315	ATGACTGAGCTTACCGAAGGCGCGAAGCTGTTCGACAAAGAGATTCCCTATATCACCGAGCTGGAGGGCGACGTAGAGGGCATGAAGTTCATCATTAACGGCGTTGGCACTGGCGATGCCACCACGGGCACCATCAAGGCGAAGTACATCTGCACCACCGGCGAACTGCCCGTGCCCTGGGCTACCATCCTGTCATCCCTGTCGTACGGCGTGTTTTGCTTCGCTAAATACCCCCGCCACATTGCGGACTTCTTCAAGTCCACCCAACCCGATGGCTACACACAGGACCGCATCATCTCGTTCGACGACGACGGCCAGTACGACGTGAAAGCCAAAGTGACGTATGAGAACGGTGCACTATACAACCGCGTTGCTTTGAAGGGCACTGGTTTCAAGTCA…	3	cgre24_1160	H2	165
MTEPPKGAKLFEKEIPYVTELEGDVEGMKFIIRGEGTGDATTGTIKAKYICTTGDLPVPWATILSSLSYGVFCFAKYPPHIVDFFKSTQPDGYSQDRTISFDNDGQYDVKAKVTYEKGTLYNRANMKGTGFNSNGNILGMRVSYHSPPHAVYILPDRENGGMKIEYNMAFGVMGGGHQMARHAQFNRPLGVWVDEYPLYHHLTVWTSFGKDPDDGETDHLTIVEVIKAVDLETYR*	A2E:L3P:T4P:E5K:I17V:K32R:R78P:A81V:I97T:N116K:V123A:T124N:V125M:K131N:L142S:K157E:K167M:D170G:K186R:A190V:E192V:E193D:D194E:D214G	A2E:L3P:T4P:E5K:I17V:K32R:R78P:A81V:I100T:N119K:V126A:T127N:V128M:K134N:L145S:K160E:K170M:D173G:K189R:A193V:E195V:E196D:D197E:D220G	cgre	24	13	5.9233193	5.4831886	ATGACTGAGCCTCCCAAGGGCGCGAAGCTGTTCGAAAAAGAGATTCCCTATGTGACCGAGCTGGAGGGCGACGTAGAGGGCATGAAGTTCATCATTCGCGGCGAGGGCACTGGCGATGCCACCACGGGCACCATCAAGGCGAAGTACATCTGCACCACCGGCGACCTGCCCGTGCCCTGGGCTACCATCCTGTCATCCCTGTCGTACGGCGTGTTTTGCTTCGCTAAATACCCCCCTCACATTGTGGACTTCTTCAAGTCCACCCAACCCGATGGCTACAGTCAGGACCGCACCATCTCGTTCGACAATGACGGCCAGTACGACGTGAAAGCCAAAGTGACGTATGAGAAAGGTACACTATACAACCGCGCTAACATGAAGGGCACTGGTTTCAATTCA…	3	cgre24_1748	A3	37
MTEHPEGAKLFVKEIPYITELEGDVEGMKFIIKGEGTGDATTGTIKAKYICTTGEMPVPWATILSSLSYGVFCFAQYPPHIADFFKSTQPEGYSQDRIISFDDDGQYDVKAKVTYENGTLFNRVNVKGTGFNSNGNILGMRVMHHSPPHVVYILPDRKNGGMKIEYNKAFDVMGGDHQMARHSQFNKPLGAWKEDYPPYHHLTVWTSVGKDADDNETDHLKIVEVIKAVDLETYR*	A2E:L3H:T4P:E11V:D54E:L55M:K75Q:R78P:D90E:N102D:Y120F:T124N:K131N:L142M:Y143H:A149V:G175D:A182S:E192K:L197P:F207V:P211A:D214N:T220K	A2E:L3H:T4P:E11V:D54E:L55M:K75Q:R78P:D93E:N105D:Y123F:T127N:K134N:L145M:Y146H:A152V:G178D:A185S:E195K:L203P:F213V:P217A:D220N:T226K	cgre	24	11	5.889955	5.5366354	ATGACTGAACACCCGGAAGGCGCGAAGCTGTTCGTGAAAGAGATTCCCTATATCACCGAGCTGGAGGGCGACGTAGAGGGCATGAAGTTCATCATTAAGGGCGAGGGCACTGGCGATGCCACCACGGGCACCATCAAGGCGAAGTACATCTGCACCACCGGCGAAATGCCCGTGCCCTGGGCTACCATCCTGTCATCCCTGTCGTACGGCGTGTTTTGCTTCGCTCAATACCCCCCGCACATTGCGGACTTCTTCAAGTCCACCCAACCCGAGGGCTACAGTCAGGACCGCATCATCTCGTTCGACGACGACGGCCAGTACGACGTGAAAGCCAAAGTGACGTATGAGAACGGTACACTATTCAACCGCGTTAACGTGAAGGGCACTGGTTTCAACTCA…	3	cgre24_155	B3	163
MTELTGGAKLFEEEIPYVTELEGDVEGMKFIIKGEGTGDATTGTIKAKYICTTGELPVPWATILSSLSYGVFCFAKYPPHIPDFFKSTQPDGYTQDRIISFDDDGQYDVKARVTYENGTLYNRVAVKGTGFNSNGNILGMRVSYHSPPHAVYILPDRNNGGLKIEFNMAFDVLGGGHQMARHSQFNKPLGAWEEDYPQYHHLTVWTSCGKDPDDDETDHLKILEVIKAVDVETYR*	A2E:E5G:K12E:I17V:D54E:R78P:A81P:S93T:N102D:K111R:T124A:K131N:L142S:K157N:M161L:Y165F:K167M:M172L:A182S:L197Q:F207C:T220K:V222L:L230V	A2E:E5G:K12E:I17V:D54E:R78P:A81P:S96T:N105D:K114R:T127A:K134N:L145S:K160N:M164L:Y168F:K170M:M175L:A185S:L203Q:F213C:T226K:V228L:L236V	cgre	24	8	6.1005874	5.669007	ATGACTGAGCTTACCGGAGGCGCGAAGCTGTTCGAAGAGGAGATTCCCTATGTGACCGAGCTGGAGGGCGACGTAGAGGGCATGAAGTTCATCATTAAGGGCGAGGGCACTGGCGATGCCACCACGGGCACCATCAAGGCGAAGTACATCTGCACCACCGGCGAGCTGCCCGTGCCCTGGGCTACCATCCTGTCATCCCTGTCGTACGGCGTGTTTTGCTTCGCTAAATACCCCCCACACATTCCTGACTTCTTCAAGTCCACCCAACCCGATGGCTACACTCAGGACCGCATCATCTCGTTCGACGATGACGGCCAGTACGACGTGAAAGCCCGGGTGACGTATGAGAACGGTACACTATACAACCGCGTTGCCGTGAAGGGCACTGGTTTCAACTCA…	3	cgre24_900	C3	199
MTEPTGGAKLFEKEIPYITELEGDVEGMKFIIKGVGTGDATTGTIKAKYICTTGDMPVPWATILSSLSYGVFCFAKYPRHIVDFFKSTQPDGYTQDRIISFDNDGQYDVKARVTYENGTLYNRVNVKGTGFKSNGNILGMRVLYHSPPHVVYVLPDRRNGGMKIEYTMVFVVVDGGHQMARHAQFNRPLGAWEEDYPLYHHLTVWTSVSKDPDDADTDHLTIFEVIKAVDLETYR*	A2E:L3P:E5G:E34V:L55M:A81V:S93T:K111R:T124N:A149V:I152V:K157R:N166T:K167M:A168V:D170V:M172V:G173D:K186R:F207V:G208S:D214A:E215D:V222F	A2E:L3P:E5G:E34V:L55M:A81V:S96T:K114R:T127N:A152V:I155V:K160R:N169T:K170M:A171V:D173V:M175V:G176D:K189R:F213V:G214S:D220A:E221D:V228F	cgre	24	7	5.6977363	5.368196	ATGACTGAACCGACCGGTGGCGCGAAGCTGTTCGAAAAAGAGATTCCCTATATCACCGAGCTGGAGGGCGACGTAGAGGGCATGAAGTTCATCATTAAGGGCGTGGGCACTGGCGATGCCACCACGGGCACCATCAAGGCGAAGTACATCTGCACCACCGGCGACATGCCCGTGCCCTGGGCTACCATCCTGTCATCCCTGTCGTACGGCGTGTTTTGCTTCGCTAAATACCCCCGCCACATTGTAGACTTCTTCAAGTCCACCCAACCCGATGGCTACACGCAGGACCGCATCATCTCGTTCGACAATGACGGCCAGTACGACGTGAAAGCCCGCGTGACGTATGAGAACGGTACACTATACAACCGCGTTAATGTGAAGGGCACTGGTTTCAAGTCA…	3	cgre24_896	D3	65
MTEPTGGAKLFDKEIPYITELEGDVEGMKFIINGVGTGDAATGTIKAKYICTTGELPVPWATILSSLSYGVFCFAKYPRHIVDFFKATQPDGYSQDRIITFDNDGQYDVKAKVTYENGTLFNRVILKGTGFNSNGNILGMRVLHHSPPHAVYIMPDRKNGGLKIEYNKAFDVMGGDHQMARHSQFNKPLGAWVEDYPVYHHLTVWTSVGKDPDDDDTDHLTIVEVIKAVDLETYR*	A2E:L3P:E5G:E11D:K32N:E34V:T40A:D54E:A81V:S86A:S99T:Y120F:T124I:V125L:K131N:Y143H:L153M:M161L:G175D:A182S:E192V:L197V:F207V:E215D	A2E:L3P:E5G:E11D:K32N:E34V:T40A:D54E:A81V:S88A:S102T:Y123F:T127I:V128L:K134N:Y146H:L156M:M164L:G178D:A185S:E195V:L203V:F213V:E221D	cgre	24	7	5.8356423	5.5641584	ATGACTGAACCCACCGGGGGCGCGAAGCTGTTCGACAAAGAGATTCCCTATATCACCGAGCTGGAGGGCGACGTAGAGGGCATGAAGTTCATCATTAATGGCGTCGGCACTGGCGATGCCGCGACGGGCACCATCAAGGCGAAGTACATCTGCACCACCGGCGAGCTGCCCGTGCCCTGGGCTACCATCCTGTCATCCCTGTCGTACGGCGTGTTTTGCTTCGCTAAATACCCCCGCCACATTGTTGACTTCTTCAAGGCTACCCAACCCGATGGCTACAGTCAGGACCGCATCATCACATTCGACAATGACGGCCAGTACGACGTGAAAGCCAAAGTGACGTATGAGAACGGTACACTATTCAACCGCGTTATACTGAAGGGCACTGGTTTCAACTCA…	3	cgre24_1092	E3	162
MTELPKGAKLFEKEIPYVTELEGDVEGMKFIIKGEGTGDATTGTIKAKYICTTGALPVPWATILSSLSYGVFCFAKYPRHIVDFFKSTQPDGYTQDRIISFDNDGQYDVRAKVTYENGKLYNRVTVKGTGFNTNGNILGMRVLHHSPPHVVYVLPDRKNGGMMIEYNKAFEVKGGGYQMARHSQFNKPLGAWVEDYPQYHHLTVWTSFGKDPDDDDTDHLKIIEVIKAVDLETYR*	A2E:T4P:E5K:I17V:D54A:A81V:S93T:K109R:T118K:K131N:S132T:Y143H:A149V:I152V:K162M:D170E:M172K:H176Y:A182S:E192V:L197Q:E215D:T220K:V222I	A2E:T4P:E5K:I17V:D54A:A81V:S96T:K112R:T121K:K134N:S135T:Y146H:A152V:I155V:K165M:D173E:M175K:H179Y:A185S:E195V:L203Q:E221D:T226K:V228I	cgre	24	7	6.1319885	5.619298	ATGACTGAGCTTCCAAAAGGCGCGAAGCTGTTCGAAAAAGAGATTCCCTATGTTACCGAGCTGGAGGGCGACGTAGAGGGCATGAAGTTCATCATTAAGGGCGAGGGCACTGGCGATGCCACCACGGGCACCATCAAGGCGAAGTACATCTGCACCACCGGCGCTCTGCCCGTGCCCTGGGCTACCATCCTGTCATCCCTGTCGTACGGCGTGTTTTGCTTCGCTAAATACCCCCGCCACATTGTTGACTTCTTCAAGTCCACCCAACCCGATGGCTACACTCAGGACCGCATCATCTCGTTCGACAATGACGGCCAGTACGACGTGCGTGCCAAAGTGACGTATGAGAACGGTAAGCTATACAACCGCGTTACCGTGAAGGGCACTGGTTTCAACACC…	3	cgre24_463	F3	229
MTELTVGAKLFEKEVPYVTELEGDVEGMKFIIKGVGTGDATTGTIKAKYICTTGELPVPWATILSSLSYGVFCFAQYPPHIVDFFKSTQPDGYTQDRIISFDNDGQFDVKAKVRYENGKLYNRVTVKGTGFKSKGNILGMRVLYHSPPHVVYILPDRNNGGMKIEYNMAFEVVGGGHQMARHSQFNRPLGAWEEDYPLYHHLTVWTNVGKDPGDDETDHLTIVEVIKAVDLETYR*	A2E:E5V:I14V:I17V:E34V:D54E:K75Q:R78P:A81V:S93T:Y106F:T113R:T118K:N133K:A149V:K157N:K167M:D170E:M172V:A182S:K186R:S206N:F207V:D212G	A2E:E5V:I14V:I17V:E34V:D54E:K75Q:R78P:A81V:S96T:Y109F:T116R:T121K:N136K:A152V:K160N:K170M:D173E:M175V:A185S:K189R:S212N:F213V:D218G	cgre	24	6	5.919398	5.5418983	ATGACTGAGCTTACCGTCGGCGCGAAGCTGTTCGAAAAAGAGGTCCCCTATGTGACCGAGCTGGAGGGCGACGTAGAGGGCATGAAGTTCATCATTAAGGGCGTGGGCACTGGCGATGCCACCACGGGCACCATCAAGGCGAAGTACATCTGCACCACCGGCGAGCTGCCCGTGCCCTGGGCTACCATCCTGTCATCCCTGTCGTACGGCGTGTTTTGCTTCGCTCAATACCCCCCACACATTGTAGACTTCTTCAAGTCCACCCAACCCGATGGCTACACACAGGACCGCATCATCTCGTTCGACAATGACGGCCAGTTCGACGTGAAAGCCAAAGTGCGGTATGAGAACGGTAAACTATACAACCGCGTTACCGTGAAGGGCACTGGTTTCAAGTCA…	3	cgre24_575	G3	119
MPELPEGAKLFVEEIPYITELEGDVEGMKFIIKGVGTGDATTGTIKAKYICTTGELPVPWATILSSLSYGVFCFAQYPPHIPDFFKSTQPDGYTQDRIISFDNDGKYDVKAKVTYENGKLYNRVAVKGTGFNSNGNILGMRVLYHSPPHSVYILPDRKNGGMMIEYNMVFDVLGGGHQIARHAQFNKPLGAWEEDYPLYHHLTVWTNFGKDPDDDDTDHLKIVEVIKAVDLETYR*	T1P:A2E:T4P:E11V:K12E:E34V:D54E:K75Q:R78P:A81P:S93T:Q105K:T118K:T124A:K131N:A149S:K162M:K167M:A168V:M172L:M178I:S206N:E215D:T220K	T1P:A2E:T4P:E11V:K12E:E34V:D54E:K75Q:R78P:A81P:S96T:Q108K:T121K:T127A:K134N:A152S:K165M:K170M:A171V:M175L:M181I:S212N:E221D:T226K	cgre	24	8	5.8324113	5.5857267	ATGCCAGAGCTTCCCGAAGGCGCGAAGCTGTTCGTGGAAGAGATTCCCTATATCACCGAGCTGGAGGGCGACGTAGAGGGCATGAAGTTCATCATTAAGGGCGTGGGCACTGGCGATGCCACCACGGGCACCATCAAGGCGAAGTACATCTGCACCACCGGCGAACTGCCCGTGCCCTGGGCTACCATCCTGTCATCCCTGTCGTACGGCGTGTTTTGCTTCGCTCAGTACCCCCCTCACATTCCAGACTTCTTCAAGTCCACCCAACCCGATGGCTACACGCAGGACCGCATCATCTCGTTCGACAATGACGGCAAGTACGACGTGAAAGCCAAAGTGACGTATGAGAACGGTAAACTATACAACCGCGTTGCTGTGAAGGGCACTGGTTTCAATTCA…	3	cgre24_1380	H3	5
MTELPEGAKLFEEEIPYVTELEGDVEGMKFIIKGVGTGDATTGTIKAKYICTTGELPVPWATLLSSLSYGVFCFAKYPRNIPDFFKSTQPDGYSQDRIITFDDDGEYDVKAKVTYENGTLYNRVNMKGTGFNSNGNVLGMRIMYHSPPHAVYILPDRKNGGMMIEYNKAFEVMGGGHQMARHSQFNRPLGVWEEEYPPYHHLTVWTSVGKDPDDADTDHLKIVEVIKAIDLETYR*	A2E:T4P:K12E:I17V:E34V:D54E:I62L:H79N:A81P:S99T:N102D:Q105E:T124N:V125M:K131N:I136V:V141I:L142M:K162M:D170E:A182S:K186R:A190V:D194E:L197P:F207V:D214A:E215D:T220K:V228I	A2E:T4P:K12E:I17V:E34V:D54E:I62L:H79N:A81P:S102T:N105D:Q108E:T127N:V128M:K134N:I139V:V144I:L145M:K165M:D173E:A185S:K189R:A193V:D197E:L203P:F213V:D220A:E221D:T226K:V234I	cgre	30	6	6.073729	5.593996	ATGACTGAACTTCCAGAAGGCGCGAAGCTGTTCGAAGAAGAGATTCCCTATGTCACCGAGCTGGAGGGCGACGTAGAGGGCATGAAGTTCATCATTAAGGGCGTAGGCACTGGCGATGCCACCACGGGCACCATCAAGGCGAAGTACATCTGCACCACCGGCGAACTGCCCGTGCCCTGGGCTACCCTCCTGTCATCCCTGTCGTACGGCGTGTTTTGCTTCGCTAAATACCCCCGCAATATTCCAGACTTCTTCAAGTCCACCCAACCCGATGGCTACAGTCAGGACCGCATCATCACGTTCGACGACGACGGCGAGTACGACGTGAAAGCCAAAGTGACGTATGAGAACGGTACACTATACAACCGCGTTAACATGAAGGGCACTGGTTTCAATTCA…	3	cgre30_83	A4	115
MTELTKAAKLFVKEIPYVTELEGDVEGMKFTIKGVGTGDATTGTIKAKYICTTGELPVPWATILSSLSYGVFCFAKYPRHIPDFFKSTQPDGYTQDRIISFDNDGQYNVKAKVTYEKGKLYNRVNVKGTGFNSNGNILGMRVLYYSPPHVVYVLPDRQNGGMKIEYNMVFEVMGGDHQMARHAQFNKPLGAWVEEYPLYHHLTVWTNVGKDPDDYDTDHLKIVEVIKAVDLETYR*	A2E:E5K:G6A:E11V:I17V:I30T:E34V:D54E:A81P:S93T:D107N:N116K:T118K:T124N:K131N:H144Y:A149V:I152V:K157Q:K167M:A168V:D170E:G175D:E192V:D194E:S206N:F207V:D214Y:E215D:T220K	A2E:E5K:G6A:E11V:I17V:I30T:E34V:D54E:A81P:S96T:D110N:N119K:T121K:T127N:K134N:H147Y:A152V:I155V:K160Q:K170M:A171V:D173E:G178D:E195V:D197E:S212N:F213V:D220Y:E221D:T226K	cgre	30	7	6.3358903	5.749673	ATGACTGAACTTACCAAGGCGGCGAAGCTGTTCGTTAAAGAGATTCCCTATGTTACCGAGCTGGAGGGCGACGTAGAGGGCATGAAGTTCACGATTAAGGGCGTCGGCACTGGCGATGCCACCACGGGCACCATCAAGGCGAAGTACATCTGCACCACCGGCGAGCTGCCCGTGCCCTGGGCTACCATCCTGTCATCCCTGTCGTACGGCGTGTTTTGCTTCGCTAAATACCCCCGCCACATTCCGGACTTCTTCAAGTCCACCCAACCCGATGGCTACACGCAGGACCGCATCATCTCGTTCGACAATGACGGCCAGTACAATGTGAAAGCCAAAGTGACGTATGAGAAGGGTAAACTATACAACCGCGTTAATGTGAAGGGCACTGGTTTCAATTCA…	3	cgre30_156	B4	75
MTELPVGAKLFDKEIPYITELEGEVEGMKFTVKGEGTGDATTGTIKAKYTCTTGELPVPWASILSSMSYGVFCFAKSPRHITDFFKATQPDGYSQDRIISFDNDGQYDVRAKVTYENGTLYNRVNVKGTGFNSNGNILGMRVLYRSPPHVVYILPDRKNGGLKIEYNMAFDLMGGGHQMARHTQFNKPLGVWVDEYPLYHHLTVWTSVGKDPDDDVTDHLTIIEVIKAVDLETYR*	A2E:T4P:E5V:E11D:D23E:I30T:I31V:I49T:D54E:T61S:L66M:Y76S:A81T:S86A:K109R:T124N:K131N:H144R:A149V:M161L:K167M:V171L:A182T:A190V:E192V:E193D:D194E:F207V:E215V:V222I	A2E:T4P:E5V:E11D:D23E:I30T:I31V:I49T:D54E:T61S:L66M:Y76S:A81T:S88A:K112R:T127N:K134N:H147R:A152V:M164L:K170M:V174L:A185T:A193V:E195V:E196D:D197E:F213V:E221V:V228I	cgre	30	11	6.279318	5.6352477	ATGACTGAACTTCCTGTAGGCGCGAAGCTGTTCGACAAAGAGATTCCCTATATCACCGAGCTGGAGGGCGAGGTAGAGGGCATGAAGTTCACTGTTAAGGGCGAGGGCACTGGCGATGCCACCACGGGCACCATCAAGGCGAAGTACACTTGCACCACCGGCGAGCTGCCCGTGCCCTGGGCTAGCATCCTGTCATCCATGTCGTACGGCGTGTTTTGCTTCGCTAAAAGTCCCCGCCACATTACTGACTTCTTCAAGGCAACCCAACCCGATGGCTACAGTCAGGACCGCATCATCTCGTTCGACAATGACGGCCAGTACGACGTGCGGGCCAAAGTGACGTATGAGAACGGTACACTATACAACCGCGTTAATGTGAAGGGCACTGGTTTCAACTCA…	3	cgre30_359	C4	4
MTERPGGAKLFDKEIPYITELEGDVEGMKFTIMGEGTGDATTGTIKAKYICTTGEMPVPWASILSSLSYGVFCFAKYPRHIPDFFKSTQPDGYTQDRIITFDDDGKYNVKAKVTYENGKLYNRATVKGTGFNSNGNILGMRVMYHSPPHVVYVLPDRKNGGMRIEYNMAFGVMGGGHQMARHSQFNKPLGVWEEDYPQYHHLTVWTSFGKDPDDDDTDHLTIIEVIKAVDLETYR*	A2E:L3R:T4P:E5G:E11D:I30T:K32M:D54E:L55M:T61S:A81P:S93T:S99T:N102D:Q105K:D107N:T118K:V123A:K131N:L142M:A149V:I152V:K162R:K167M:D170G:A182S:A190V:L197Q:E215D:V222I	A2E:L3R:T4P:E5G:E11D:I30T:K32M:D54E:L55M:T61S:A81P:S96T:S102T:N105D:Q108K:D110N:T121K:V126A:K134N:L145M:A152V:I155V:K165R:K170M:D173G:A185S:A193V:L203Q:E221D:V228I	cgre	30	13	6.359627	5.8320165	ATGACTGAACGGCCTGGCGGCGCGAAGCTGTTCGATAAAGAGATTCCCTATATCACCGAGCTGGAGGGCGACGTAGAGGGCATGAAGTTCACAATTATGGGCGAGGGCACTGGCGATGCCACCACGGGCACCATCAAGGCGAAGTACATCTGCACCACCGGCGAAATGCCCGTGCCCTGGGCTTCGATCCTGTCATCCCTGTCGTACGGCGTGTTTTGCTTCGCTAAATACCCCCGCCACATTCCGGACTTCTTCAAGTCCACCCAACCCGATGGCTACACTCAGGACCGCATCATCACGTTCGACGATGACGGCAAATACAACGTGAAAGCCAAAGTGACGTATGAGAACGGTAAGCTATACAACCGCGCCACCGTGAAGGGCACTGGTTTCAACTCA…	3	cgre30_415	D4	63
MPARPVGAKLFEKEIPYITELEGEVEGMKFIIKGVGSGDATTGTIKAKYICTTGEMPVPWATILSSLSYGVFCFAKYPPHIADFFKSTQPDGYTQDRIITFDNDGQYDVKARVTYENGKLFNRVTMKGTGFNTNGNILGMRVLDRSPPHVVYVLPDRKNGGMKIEYNMAFEVMGGDHQMARHSQFNKPLGAWEDEYPLYHHLTVWTSVGKDPDDDDTDHLTIVEVIKAVDLETYR*	T1P:L3R:T4P:E5V:D23E:E34V:T36S:D54E:L55M:R78P:S93T:S99T:K111R:T118K:Y120F:V125M:K131N:S132T:Y143D:H144R:A149V:I152V:K167M:D170E:G175D:A182S:E193D:D194E:F207V:E215D	T1P:L3R:T4P:E5V:D23E:E34V:T36S:D54E:L55M:R78P:S96T:S102T:K114R:T121K:Y123F:V128M:K134N:S135T:Y146D:H147R:A152V:I155V:K170M:D173E:G178D:A185S:E196D:D197E:F213V:E221D	cgre	30	10	6.2751317	5.814828	ATGCCAGCACGCCCGGTGGGCGCGAAGCTGTTCGAAAAAGAGATTCCCTATATCACCGAGCTGGAGGGCGAAGTAGAGGGCATGAAGTTCATCATTAAGGGCGTAGGCTCTGGCGATGCCACCACGGGCACCATCAAGGCGAAGTACATCTGCACCACCGGCGAAATGCCCGTGCCCTGGGCTACCATCCTGTCATCCCTGTCGTACGGCGTGTTTTGCTTCGCTAAATACCCCCCCCACATTGCGGACTTCTTCAAGTCCACCCAACCCGATGGCTACACCCAGGACCGCATCATCACCTTCGACAATGACGGCCAGTACGACGTGAAAGCCCGGGTGACGTATGAGAACGGTAAGCTATTCAACCGCGTTACCATGAAGGGCACTGGTTTCAACACA…	3	cgre30_557	E4	4
MTELTVGAKLFEKEIPYVTELEGDVEGMKFIVKGVGTGDATTGTIKAKYICTTGELPVPWASLLSSLSYGVFCFAQYPPHIPDFFKSTQPEGYSQDRIISFDNDGQYDVRAKVTYENGKLYNRVNVKGTGFNTNGNILGMRVSYHSPPHSVYVLPDRKNGGMKIEYNMAFELMGGDHQMARHSQFNKPLGVWEEDYPPYHHLTVWTSCGKDPDDDDTDHLTIVEVIKAVDLESYR*	A2E:E5V:I17V:I31V:E34V:D54E:T61S:I62L:K75Q:R78P:A81P:D90E:K109R:T118K:T124N:K131N:S132T:L142S:A149S:I152V:K167M:D170E:V171L:G175D:A182S:A190V:L197P:F207C:E215D:T232S	A2E:E5V:I17V:I31V:E34V:D54E:T61S:I62L:K75Q:R78P:A81P:D93E:K112R:T121K:T127N:K134N:S135T:L145S:A152S:I155V:K170M:D173E:V174L:G178D:A185S:A193V:L203P:F213C:E221D:T243S	cgre	30	8	6.7574105	5.8661847	ATGACTGAGCTTACCGTTGGCGCGAAGCTGTTCGAAAAAGAGATTCCCTATGTAACCGAGCTGGAGGGCGACGTAGAGGGCATGAAGTTCATCGTAAAGGGCGTCGGCACTGGCGATGCCACCACGGGCACCATCAAGGCGAAGTACATCTGCACCACCGGCGAGCTGCCCGTGCCCTGGGCTTCCTTACTGTCATCCCTGTCGTACGGCGTGTTTTGCTTCGCTCAGTACCCCCCGCACATTCCTGACTTCTTCAAGTCCACCCAACCCGAGGGCTACAGTCAGGACCGCATCATCTCGTTCGACAATGACGGCCAGTACGACGTGCGGGCCAAAGTGACGTATGAGAACGGTAAACTATACAACCGCGTTAATGTGAAGGGCACTGGTTTCAACACT…	3	cgre30_626	F4	230
MTAPPGGAKLFAKVIPYITELEGDVEGMRFIIKGVGTGDATTGTIKAKYICTTGELPVPWATILSSLSYGVFCFAKYPRHIPDFFKSTQPYGYTQDRIIAFDNDGQFDVKAKVTYENGTLYNRVNVKGTGFNSNGNILGMRISYHSPPHVVYILPDRNNGGMKIEYNMAFEVLGGGHQMARHSQFNRPLGAWDEDYPMYHHLTVWTSFGKDADDDDTDHLKIVEVIRAVDLETYR*	L3P:T4P:E5G:E11A:E13V:K28R:E34V:D54E:A81P:D90Y:S93T:S99A:Y106F:T124N:K131N:V141I:L142S:A149V:K157N:K167M:D170E:M172L:A182S:K186R:E192D:L197M:P211A:E215D:T220K:K226R	L3P:T4P:E5G:E11A:E13V:K28R:E34V:D54E:A81P:D93Y:S96T:S102A:Y109F:T127N:K134N:V144I:L145S:A152V:K160N:K170M:D173E:M175L:A185S:K189R:E195D:L203M:P217A:E221D:T226K:K232R	cgre	30	10	6.195241	5.7518163	ATGACTGCACCTCCCGGTGGCGCGAAGCTGTTCGCAAAAGTGATTCCCTATATCACCGAGCTGGAGGGCGACGTAGAGGGCATGCGGTTCATCATTAAGGGCGTGGGCACTGGCGATGCCACCACGGGCACCATCAAGGCGAAGTACATCTGCACCACCGGCGAACTGCCCGTGCCCTGGGCTACCATCCTGTCATCCCTGTCGTACGGCGTGTTTTGCTTCGCTAAATACCCCCGCCACATTCCGGACTTCTTCAAGTCCACCCAACCCTATGGCTACACACAGGACCGCATCATCGCGTTCGACAATGACGGCCAGTTCGACGTGAAAGCCAAAGTGACGTATGAGAACGGTACACTATACAACCGCGTTAATGTGAAGGGCACTGGTTTCAATTCA…	3	cgre30_733	G4	52
MPELPVGAKLFEKEIPYVTELEGDVEGMKFIIKGKGTGDASTGTIKAKYICTTGELPVPWATILSSLSYGVFCFAKYPRHIADFFKSTQPDGYTQDRTITFDNDGQYDVKAKVTFEKGTLYNRVNVKGTGFRTNGNILGMRVSHHSPPHVVYILPDRKNGGLKIEYNMAFEVLGGGHQMARHAQFNKPLGVWEGEYPLYHHLTVWTSFGKDPDDADTDHLKIIEVIKAVDLETYR*	T1P:A2E:T4P:E5V:I17V:E34K:T40S:D54E:S93T:I97T:S99T:Y114F:N116K:T124N:K131R:S132T:L142S:Y143H:A149V:M161L:K167M:D170E:M172L:A190V:E193G:D194E:D214A:E215D:T220K:V222I	T1P:A2E:T4P:E5V:I17V:E34K:T40S:D54E:S96T:I100T:S102T:Y117F:N119K:T127N:K134R:S135T:L145S:Y146H:A152V:M164L:K170M:D173E:M175L:A193V:E196G:D197E:D220A:E221D:T226K:V228I	cgre	30	11	6.4834895	5.678392	ATGCCCGAGCTTCCCGTCGGCGCGAAGCTGTTCGAAAAAGAGATTCCCTATGTGACCGAGCTGGAGGGCGACGTAGAGGGCATGAAGTTCATCATTAAGGGCAAGGGCACTGGCGATGCCTCTACGGGCACCATCAAGGCGAAGTACATCTGCACCACCGGCGAGCTGCCCGTGCCCTGGGCTACCATCCTGTCATCCCTGTCGTACGGCGTGTTTTGCTTCGCTAAATACCCCCGCCACATTGCGGACTTCTTCAAGTCCACCCAACCCGATGGCTACACGCAGGACCGCACTATCACTTTCGACAATGACGGCCAGTACGACGTGAAAGCCAAAGTGACGTTTGAGAAAGGTACACTATACAACCGCGTTAATGTGAAGGGCACTGGTTTCCGCACC…	3	cgre30_880	H4	13
MTEPPGGAKLFDKEIPYITELEGDVEGMKFIIKGVGTGDATTGTIKAKYICTTGDMPVPWATILSSLSYGVFCFAQYPPHITDFFKSTQPDGYSQDRIISFDNDGQYDVKAKVTYEDGTLYNRVIMKGTGFNPNGNILGMRVSHHSPPHVVYVLPDHKNGGLMIEYNKAFEVMGGGHQMARHAQLNKPLGAWEDEYPQYHHLTVWTSCGKDPDDDDTDHLTVVEVIKAVDLETYR*	A2E:L3P:T4P:E5G:E11D:E34V:L55M:K75Q:R78P:A81T:N116D:T124I:V125M:K131N:S132P:L142S:Y143H:A149V:I152V:R156H:M161L:K162M:D170E:F184L:E193D:D194E:L197Q:F207C:E215D:I221V	A2E:L3P:T4P:E5G:E11D:E34V:L55M:K75Q:R78P:A81T:N119D:T127I:V128M:K134N:S135P:L145S:Y146H:A152V:I155V:R159H:M164L:K165M:D173E:F187L:E196D:D197E:L203Q:F213C:E221D:I227V	cgre	30	20	6.1980653	5.5974226	ATGACTGAGCCGCCGGGAGGCGCGAAGCTGTTCGATAAAGAGATTCCCTATATCACCGAGCTGGAGGGCGACGTAGAGGGCATGAAGTTCATCATTAAGGGCGTCGGCACTGGCGATGCCACCACGGGCACCATCAAGGCGAAGTACATCTGCACCACCGGCGACATGCCCGTGCCCTGGGCTACCATCCTGTCATCCCTGTCGTACGGCGTGTTTTGCTTCGCTCAATACCCCCCACACATTACAGACTTCTTCAAGTCCACCCAACCCGATGGCTACAGTCAGGACCGCATCATCTCGTTCGACAATGACGGCCAGTACGACGTGAAAGCCAAAGTGACGTATGAGGACGGTACACTATACAACCGCGTTATCATGAAGGGCACTGGTTTCAATCCA…	3	cgre30_975	A5	25
MIEPPEGAKLFDKEIPYVTVLEGDVEGMKFIIMGEGTGDAATGTIKAKYICATGDMPVPWASILSSLSYGVFCFAQYPPHIADFFKSTQPDGYSQDRTISFDNDGQFNVRAKVTYENGTLFNRVIVKGTGFNTNGNILGMRVLHHSPPHVVYILPDRMNGGMKIEYNMAFVVMGGGHQMARHAQFNKPLGAWEEDYPLYHHLTVWTSCGKDPDDGDTDHLTIVEVIKAVDLETYR*	T1I:A2E:L3P:T4P:E11D:I17V:E19V:K32M:T40A:T51A:L55M:T61S:K75Q:R78P:I97T:Y106F:D107N:K109R:Y120F:T124I:K131N:S132T:Y143H:A149V:K157M:K167M:D170V:F207C:D214G:E215D	T1I:A2E:L3P:T4P:E11D:I17V:E19V:K32M:T40A:T51A:L55M:T61S:K75Q:R78P:I100T:Y109F:D110N:K112R:Y123F:T127I:K134N:S135T:Y146H:A152V:K160M:K170M:D173V:F213C:D220G:E221D	cgre	30	21	5.9898906	5.382964	ATGATTGAACCCCCAGAAGGCGCGAAGCTGTTCGATAAAGAGATTCCCTATGTTACCGTCCTGGAGGGCGACGTAGAGGGCATGAAGTTCATCATTATGGGCGAGGGCACTGGCGATGCCGCGACGGGCACCATCAAGGCGAAGTACATCTGCGCAACCGGCGACATGCCCGTGCCCTGGGCTTCTATCCTGTCATCCCTGTCGTACGGCGTGTTTTGCTTCGCTCAATACCCCCCACACATTGCGGACTTCTTCAAGTCCACCCAACCCGATGGCTACAGTCAGGACCGCACCATCTCGTTCGACAATGACGGCCAGTTTAACGTGCGCGCCAAAGTGACGTATGAGAACGGTACACTATTTAACCGCGTTATTGTGAAGGGCACTGGTTTCAACACC…	3	cgre30_1090	B5	8
MTEPPGGAKLFDEEIPYVTELEGDVEGMKFIIMGEGTGDATTGTIKAKYICTTGDLPVPWASILSSLSYGVFCFAKYPRHIVDFFKSTQPEGYSQDRIITFDNDGQYDVRAKVTYEKGTLYNRVAMRGTGFNSNGNILGMRISYHSPPHAVYILPDHKNGGLKIEYNMAFDVLGGDHQMARHSQFNKPLGVWEDDYPQYHHLTVWTSFGKDPDDDDTDHLTIVEVIKAVDLETYR*	A2E:L3P:T4P:E5G:E11D:K12E:I17V:K32M:T61S:A81V:D90E:S99T:K109R:N116K:T124A:V125M:K126R:K131N:V141I:L142S:R156H:M161L:K167M:M172L:G175D:A182S:A190V:E193D:L197Q:E215D	A2E:L3P:T4P:E5G:E11D:K12E:I17V:K32M:T61S:A81V:D93E:S102T:K112R:N119K:T127A:V128M:K129R:K134N:V144I:L145S:R159H:M164L:K170M:M175L:G178D:A185S:A193V:E196D:L203Q:E221D	cgre	30	16	6.1328745	5.676878	ATGACTGAACCTCCAGGAGGCGCGAAGCTGTTCGACGAGGAGATTCCCTATGTTACCGAGCTGGAGGGCGACGTAGAGGGCATGAAGTTCATCATTATGGGCGAGGGCACTGGCGATGCCACCACGGGCACCATCAAGGCGAAGTACATCTGCACCACCGGCGACCTGCCCGTGCCCTGGGCTAGTATCCTGTCATCCCTGTCGTACGGCGTGTTTTGCTTCGCTAAATACCCCCGCCACATTGTCGACTTCTTCAAGTCCACCCAACCCGAGGGCTACAGTCAGGACCGCATCATCACGTTCGACAATGACGGCCAGTACGACGTGCGTGCCAAAGTGACGTATGAGAAAGGTACACTATACAACCGCGTTGCCATGCGCGGCACTGGTTTCAATTCA…	3	cgre30_1340	C5	25
MTELTVGAKLFDEEIPYVTELEGDVEGMKFIVMGVGTGDATTGTIRAKYICTTGELPVPWATILSSLSYGVFCFAQYPPHIADFFKSTQPDGYTQDRTITFDNDGQYDVKAKVTYENGTLYNRAAMKGTGFNSNGNILGMRVSYHSPPHVVYILPDRENGGMRIEYNKAFEVLGGGHQMARHAQFNKPLGAWEEDYPQYHHLTVWTSCGKDPADADTDHLTIVEVIKAVDLETYR*	A2E:E5V:E11D:K12E:I17V:I31V:K32M:E34V:K45R:D54E:K75Q:R78P:S93T:I97T:S99T:V123A:T124A:V125M:K131N:L142S:A149V:K157E:K162R:D170E:M172L:L197Q:F207C:D212A:D214A:E215D	A2E:E5V:E11D:K12E:I17V:I31V:K32M:E34V:K45R:D54E:K75Q:R78P:S96T:I100T:S102T:V126A:T127A:V128M:K134N:L145S:A152V:K160E:K165R:D173E:M175L:L203Q:F213C:D218A:D220A:E221D	cgre	30	17	6.042535	5.6973867	ATGACTGAACTTACCGTCGGCGCGAAGCTGTTCGACGAGGAGATTCCCTATGTTACCGAGCTGGAGGGCGACGTAGAGGGCATGAAGTTCATCGTGATGGGCGTGGGCACTGGCGATGCCACCACGGGCACCATCCGCGCGAAGTACATCTGCACCACCGGCGAGCTGCCCGTGCCCTGGGCTACCATCCTGTCATCCCTGTCGTACGGCGTGTTTTGCTTCGCTCAATACCCCCCTCACATTGCGGACTTCTTCAAGTCCACCCAACCCGATGGCTACACACAGGACCGCACGATCACATTCGACAATGACGGCCAGTACGACGTGAAAGCCAAAGTGACGTATGAGAACGGTACACTATACAACCGCGCAGCCATGAAGGGCACTGGTTTCAACTCA…	3	cgre30_1538	D5	62
MTELTGGAKLFDKEIPYITVLEGDVEGMKFSVRGEGTGDATTGTIKAKYICATGELPVPWATILSSLSYGVFCFAKYPPNIVDFFKSTQPDGYTQDRTISFDNDGQYNVKAKVTYEDGKLYNRVNVKGTGFNLKGNILGMRISYHSPPHVVYVLPDRKNGGMRIEYNMAFEVMDGDYQMARHSQFNKPLGAWEDDYPQYHHLTVWTSVGKDPDDDDTDHLTIVEVIKAVDLETYR*	A2E:E5G:E11D:E19V:I30S:I31V:K32R:T51A:D54E:R78P:H79N:A81V:S93T:I97T:D107N:N116D:T118K:T124N:K131N:S132L:N133K:V141I:L142S:A149V:I152V:K162R:K167M:D170E:G173D:G175D:H176Y:A182S:E193D:L197Q:F207V:E215D	A2E:E5G:E11D:E19V:I30S:I31V:K32R:T51A:D54E:R78P:H79N:A81V:S96T:I100T:D110N:N119D:T121K:T127N:K134N:S135L:N136K:V144I:L145S:A152V:I155V:K165R:K170M:D173E:G176D:G178D:H179Y:A185S:E196D:L203Q:F213V:E221D	cgre	36	11	6.694225	5.8602276	ATGACTGAGCTTACCGGTGGCGCGAAGCTGTTCGACAAAGAGATTCCCTATATCACCGTTCTGGAGGGCGACGTAGAGGGCATGAAGTTCTCGGTGCGTGGCGAGGGCACTGGCGATGCCACCACGGGCACCATCAAGGCGAAGTACATCTGCGCGACCGGCGAGCTGCCCGTGCCCTGGGCTACCATCCTGTCATCCCTGTCGTACGGCGTGTTTTGCTTCGCTAAATACCCCCCCAATATTGTCGACTTCTTCAAGTCCACCCAACCCGATGGCTACACACAGGACCGCACAATCTCGTTCGACAATGACGGCCAGTACAATGTGAAAGCCAAAGTGACGTATGAGGATGGTAAGCTATACAACCGCGTTAACGTGAAGGGCACTGGTTTCAATCTT…	3	cgre36_121	E5	153
MTEFPDGAKLFEEEIPYITELEGDVEGLKFTIRGVGTGDASTGTIKAKYICTTGELPVPWATLLSSLSYGVFCFAQYPPHIPDFFKSTQPDGYSQDRIITFDNDGEYNVKAKVTYEDGKLYNRVNVKGTGFKSKGNILGMRVSYHSPPHVVYILPDRKNGGMKIEYNMVFEVKGGGHQMARHSQFNKPLGAWVEDYPPYHHLTVWTSVGKDADDDDTDHLKIVEVIKAVDLDTYR*	A2E:L3F:T4P:E5D:K12E:M27L:I30T:K32R:E34V:T40S:D54E:I62L:K75Q:R78P:A81P:S99T:Q105E:D107N:N116D:T118K:T124N:N133K:L142S:A149V:K167M:A168V:D170E:M172K:A182S:E192V:L197P:F207V:P211A:E215D:T220K:E231D	A2E:L3F:T4P:E5D:K12E:M27L:I30T:K32R:E34V:T40S:D54E:I62L:K75Q:R78P:A81P:S102T:Q108E:D110N:N119D:T121K:T127N:N136K:L145S:A152V:K170M:A171V:D173E:M175K:A185S:E195V:L203P:F213V:P217A:E221D:T226K:E239D	cgre	36	8	6.797773	5.7706847	ATGACTGAATTTCCGGACGGCGCGAAGCTGTTCGAAGAAGAGATTCCCTATATCACCGAGCTGGAGGGCGACGTAGAGGGCCTTAAGTTCACGATTCGTGGCGTGGGCACTGGCGATGCCAGCACGGGCACCATCAAGGCGAAGTACATCTGCACCACCGGCGAGCTGCCCGTGCCCTGGGCTACCTTGCTGTCATCCCTGTCGTACGGCGTGTTTTGCTTCGCTCAGTACCCCCCTCACATTCCGGACTTCTTCAAGTCCACCCAACCCGATGGCTACAGTCAGGACCGCATCATCACGTTCGACAATGACGGCGAATACAATGTGAAAGCCAAAGTGACGTATGAGGACGGTAAACTATACAACCGCGTTAATGTGAAGGGCACTGGTTTCAAGTCA…	3	cgre36_277	F5	70
MTEPPVAAKLFEEEIPYITELDGDVEGMKFIIKGVGTGDATTGTIKAKFICTTGELPVPWATILSSLSYGVFCFAKYPPHIPDFFKSTQPDGYSQDRTISFDNDGQYDVKANVTYENGTLYNRVILKGTGFNSKGHIMGMRVLHHSPPHVVYVLPDRNNGGMRIEYTMAFGVLGGGHQMARHSQFNKPLGAWKEEYPQYHHLTVWTSVGKDPDDDDTDHLKIVEVIKAVDLETYR*	A2E:L3P:T4P:E5V:G6A:K12E:E21D:E34V:Y48F:D54E:R78P:A81P:I97T:K111N:T124I:V125L:K131N:N133K:N135H:L137M:Y143H:A149V:I152V:K157N:K162R:N166T:K167M:D170G:M172L:A182S:E192K:D194E:L197Q:F207V:E215D:T220K	A2E:L3P:T4P:E5V:G6A:K12E:E21D:E34V:Y48F:D54E:R78P:A81P:I100T:K114N:T127I:V128L:K134N:N136K:N138H:L140M:Y146H:A152V:I155V:K160N:K165R:N169T:K170M:D173G:M175L:A185S:E195K:D197E:L203Q:F213V:E221D:T226K	cgre	36	12	6.7055936	5.895528	ATGACTGAACCACCGGTGGCGGCGAAGCTGTTCGAAGAGGAGATTCCCTATATCACCGAGCTGGACGGCGACGTAGAGGGCATGAAGTTCATCATTAAGGGCGTCGGCACTGGCGATGCCACCACGGGCACCATCAAGGCGAAGTTTATCTGCACCACCGGCGAACTGCCCGTGCCCTGGGCTACCATCCTGTCATCCCTGTCGTACGGCGTGTTTTGCTTCGCTAAATACCCCCCGCACATTCCAGACTTCTTCAAGTCCACCCAACCCGATGGCTACAGTCAGGACCGCACGATCTCGTTCGACAATGACGGCCAGTACGACGTGAAAGCCAATGTGACGTATGAGAACGGTACACTATACAACCGCGTTATTTTGAAGGGCACTGGTTTCAATTCA…	3	cgre36_422	G5	43
MTEPPEGAKLFDKEIPYITELEGDVEGKKFIIKGEGTGDATTGTIKAKYICTTGELPVPWATILSSLSYGVFCFAKYPPHIPDFFKSTQPDGYTQDRTISFDNDGQYDVKAKVTYENGKIFNRVTLKGTGFNTNGNILGMRISYRSPAHVVYILPDHKNGGMKIEYNMVFEVVGGDHQMSRHSQFNKPLGVWEEDYPQYHHVTVWTSVGKDPDDADTDHLKIVEVIKAVDLETYR*	A2E:L3P:T4P:E11D:M27K:D54E:R78P:A81P:S93T:I97T:T118K:L119I:Y120F:V125L:K131N:S132T:V141I:L142S:H144R:P147A:A149V:R156H:K167M:A168V:D170E:M172V:G175D:A179S:A182S:A190V:L197Q:L201V:F207V:D214A:E215D:T220K	A2E:L3P:T4P:E11D:M27K:D54E:R78P:A81P:S96T:I100T:T121K:L122I:Y123F:V128L:K134N:S135T:V144I:L145S:H147R:P150A:A152V:R159H:K170M:A171V:D173E:M175V:G178D:A182S:A185S:A193V:L203Q:L207V:F213V:D220A:E221D:T226K	cgre	36	13	6.4499235	5.8949924	ATGACTGAGCCCCCGGAAGGCGCGAAGCTGTTCGACAAAGAGATTCCCTATATCACCGAGCTGGAGGGCGACGTAGAGGGCAAAAAGTTCATCATTAAGGGCGAGGGCACTGGCGATGCCACCACGGGCACCATCAAGGCGAAGTACATCTGCACCACCGGCGAACTGCCCGTGCCCTGGGCTACCATCCTGTCATCCCTGTCGTACGGCGTGTTTTGCTTCGCTAAATACCCCCCCCACATTCCTGACTTCTTCAAGTCCACCCAACCCGATGGCTACACGCAGGACCGCACCATCTCGTTCGACAATGACGGCCAGTACGACGTGAAAGCCAAAGTGACGTATGAGAACGGTAAAATTTTTAACCGCGTTACCCTGAAGGGCACTGGTTTCAATACA…	3	cgre36_561	H5	6
MAEPPVGAKLFEEEIPYVTELEGDIEGMKFIIKGVGTGDATTGTIKAKYICTTGELPVPWATILSSLSYGVFCFAQYPRHIADFFKSTQPDGYTQDRIIAFDDDGQYDVRAKVTYENGILYNRVIVKGTGFNTNGNILGMRILHHSPPHVVYILPDRKNGGLMIEFNMVFEVVGGDHQMARHSQFNKPLGAWKEDYPQYHHLTVWTSVGKDADDDDTDHLTIVEVIKAVDLETYR*	T1A:A2E:L3P:T4P:E5V:K12E:I17V:V24I:E34V:D54E:K75Q:S93T:S99A:N102D:K109R:T118I:T124I:K131N:S132T:V141I:Y143H:A149V:M161L:K162M:Y165F:K167M:A168V:D170E:M172V:G175D:A182S:E192K:L197Q:F207V:P211A:E215D	T1A:A2E:L3P:T4P:E5V:K12E:I17V:V24I:E34V:D54E:K75Q:S96T:S102A:N105D:K112R:T121I:T127I:K134N:S135T:V144I:Y146H:A152V:M164L:K165M:Y168F:K170M:A171V:D173E:M175V:G178D:A185S:E195K:L203Q:F213V:P217A:E221D	cgre	36	12	6.719691	5.823497	ATGGCAGAGCCGCCCGTGGGCGCGAAGCTGTTCGAAGAAGAGATTCCCTATGTGACCGAGCTGGAGGGCGACATAGAGGGCATGAAGTTCATCATTAAGGGCGTAGGCACTGGCGATGCCACCACGGGCACCATCAAGGCGAAGTACATCTGCACCACCGGCGAACTGCCCGTGCCCTGGGCTACCATCCTGTCATCCCTGTCGTACGGCGTGTTTTGCTTCGCTCAATACCCCCGCCACATTGCGGACTTCTTCAAGTCCACCCAACCCGATGGCTACACGCAGGACCGCATCATCGCTTTCGACGATGACGGCCAGTACGACGTGCGCGCCAAAGTGACGTATGAGAACGGTATCCTATACAACCGCGTTATCGTGAAGGGCACTGGTTTCAACACC…	3	cgre36_679	A6	5
MTELPEGAKLFAKEIPYVTELEGEVEGKKFSIKGVGTGDATTGTIKAKYTCTTGELPVPWATILSSMSYGVFCFAKYPRHIPDFFKSTQPDGYTQDRIITFDNDGQYDVKAKVRYENGKVYNRVIVKGTGFNSKGNILGMRILHHSPPHVVYVLPDRNNGGMRIEYNKAFEILGGGHQMARHSQINKPLGAWVEDYPMYHHLTVWTSVGKDPDDAETDHLKIVEVIKAVDLETYR*	A2E:T4P:E11A:I17V:D23E:M27K:I30S:E34V:I49T:D54E:L66M:A81P:S93T:S99T:T113R:T118K:L119V:T124I:K131N:N133K:V141I:Y143H:A149V:I152V:K157N:K162R:D170E:V171I:M172L:A182S:F184I:E192V:L197M:F207V:D214A:T220K	A2E:T4P:E11A:I17V:D23E:M27K:I30S:E34V:I49T:D54E:L66M:A81P:S96T:S102T:T116R:T121K:L122V:T127I:K134N:N136K:V144I:Y146H:A152V:I155V:K160N:K165R:D173E:V174I:M175L:A185S:F187I:E195V:L203M:F213V:D220A:T226K	cgre	36	7	6.448309	5.71268	ATGACTGAACTTCCAGAAGGCGCGAAGCTGTTCGCTAAAGAGATTCCCTATGTTACCGAGCTGGAGGGCGAGGTAGAGGGCAAAAAGTTCAGTATTAAGGGCGTGGGCACTGGCGATGCCACCACGGGCACCATCAAGGCGAAGTACACATGCACCACCGGCGAACTGCCCGTGCCCTGGGCTACCATCCTGTCATCCATGTCGTACGGCGTGTTTTGCTTCGCTAAATACCCCCGCCACATTCCAGACTTCTTCAAGTCCACCCAACCCGATGGCTACACGCAGGACCGCATCATCACGTTCGACAATGACGGCCAGTACGACGTGAAAGCCAAAGTGCGGTATGAGAACGGTAAAGTATACAACCGCGTTATTGTGAAGGGCACTGGTTTCAACTCA…	3	cgre36_792	B6	30
MTELTVGAMLFDEEVPYITELEGDVEGMKFIINGVGTGDAATGTIKAKYICTTGELPVPWATILSSLSYGVFCFAKYPPHIPDFFKSTQPDGYTQDRIITFDNDGEYDVKAKVTYENGTLYNRVNMKGTGFNSNGNILGMRILHHSPPHVVYILPDRNNGGLKIEYNMVFEVLGGDHQMARHAQFNKPLGVWEGDYPPYHHLTVWTNVGKDPDDDKTDHLKIIEVIKAVDLETYR*	A2E:E5V:K8M:E11D:K12E:I14V:K32N:E34V:T40A:D54E:R78P:A81P:S93T:S99T:Q105E:T124N:V125M:K131N:V141I:Y143H:A149V:K157N:M161L:K167M:A168V:D170E:M172L:G175D:A190V:E193G:L197P:S206N:F207V:E215K:T220K:V222I	A2E:E5V:K8M:E11D:K12E:I14V:K32N:E34V:T40A:D54E:R78P:A81P:S96T:S102T:Q108E:T127N:V128M:K134N:V144I:Y146H:A152V:K160N:M164L:K170M:A171V:D173E:M175L:G178D:A193V:E196G:L203P:S212N:F213V:E221K:T226K:V228I	cgre	36	11	6.5802293	5.785617	ATGACTGAACTTACCGTTGGCGCGATGCTGTTCGACGAAGAGGTACCCTATATCACCGAGCTGGAGGGCGACGTAGAGGGCATGAAGTTCATCATTAACGGCGTCGGCACTGGCGATGCCGCGACGGGCACCATCAAGGCGAAGTACATCTGCACCACCGGCGAGCTGCCCGTGCCCTGGGCTACCATCCTGTCATCCCTGTCGTACGGCGTGTTTTGCTTCGCTAAATACCCCCCTCACATTCCTGACTTCTTCAAGTCCACCCAACCCGATGGCTACACACAGGACCGCATCATCACATTCGACAATGACGGCGAATACGACGTGAAAGCCAAAGTGACGTATGAGAACGGTACACTATACAACCGCGTTAATATGAAGGGCACTGGTTTCAATTCA…	3	cgre36_985	C6	80
MTELPGGAKLFDEEIPYITELEGDVEGMKFIIKGVGTGDATTGTIKAKYTCTTGYMPVPWATILSSMSYGVFCFAQYPPHIADFFKSTQPEGYTQDRVISFDDDGQYNVKAKVTYENGKLYNRVNVKGTGFNSYGNILGMRILYHSPPHAVYVLPDRNNGGMKIEYNKVFEIMGGDHQMARHSQFNKPLGVWVEDYPQYHHLTVWTSVGKDPDDDDTDHLTVLEVIKAVDLETYR*	A2E:T4P:E5G:E11D:K12E:E34V:I49T:D54Y:L55M:L66M:K75Q:R78P:D90E:S93T:I97V:N102D:D107N:T118K:T124N:K131N:N133Y:V141I:I152V:K157N:A168V:D170E:V171I:G175D:A182S:A190V:E192V:L197Q:F207V:E215D:I221V:V222L	A2E:T4P:E5G:E11D:K12E:E34V:I49T:D54Y:L55M:L66M:K75Q:R78P:D93E:S96T:I100V:N105D:D110N:T121K:T127N:K134N:N136Y:V144I:I155V:K160N:A171V:D173E:V174I:G178D:A185S:A193V:E195V:L203Q:F213V:E221D:I227V:V228L	cgre	36	13	6.2405605	5.8260365	ATGACTGAACTTCCAGGAGGCGCGAAGCTGTTCGACGAAGAGATTCCCTATATCACCGAGCTGGAGGGCGACGTAGAGGGCATGAAGTTCATCATTAAGGGCGTAGGCACTGGCGATGCCACCACGGGCACCATCAAGGCGAAGTACACTTGCACCACCGGCTATATGCCCGTGCCCTGGGCTACCATCCTGTCATCCATGTCGTACGGCGTGTTTTGCTTCGCTCAATACCCCCCCCACATTGCGGACTTCTTCAAGTCCACCCAACCCGAAGGCTACACACAGGACCGCGTCATCTCGTTCGACGACGACGGCCAGTACAACGTGAAAGCCAAAGTGACGTATGAGAACGGTAAGCTATACAACCGCGTTAACGTGAAGGGCACTGGTTTCAACTCA…	3	cgre36_1075	D6	4
MTTRPGGAKLFDKEIPYITELEGDVEGMKFIVKGVGTGDATTGTIKAKYICITGELPVPWATILSSLSYGVFCFAKYPPHIPDFFKSTQPNGYTQDRTVSFDNDGQYDVRAKVTYENGKLYNRVNVKGTGFNTDGNILGMRVLHHSPPHAVYILPDRKNGGMKVEYNMAFDLMGGDHQMARHSQFNKPLGAWVDEYPPYHHLTVWTSVGKDPDDADTDHLKIFEVIKAVDLETYR*	A2T:L3R:T4P:E5G:E11D:I31V:E34V:T51I:D54E:R78P:A81P:D90N:S93T:I97T:I98V:K109R:T118K:T124N:K131N:S132T:N133D:Y143H:I163V:K167M:V171L:G175D:A182S:E192V:E193D:D194E:L197P:F207V:D214A:E215D:T220K:V222F	A2T:L3R:T4P:E5G:E11D:I31V:E34V:T51I:D54E:R78P:A81P:D93N:S96T:I100T:I101V:K112R:T121K:T127N:K134N:S135T:N136D:Y146H:I166V:K170M:V174L:G178D:A185S:E195V:E196D:D197E:L203P:F213V:D220A:E221D:T226K:V228F	cgre	36	11	6.6330867	5.7372046	ATGACTACCCGGCCCGGAGGCGCGAAGCTGTTCGATAAAGAGATTCCCTATATCACCGAGCTGGAGGGCGACGTAGAGGGCATGAAGTTCATCGTGAAGGGCGTCGGCACTGGCGATGCCACCACGGGCACCATCAAGGCGAAGTACATCTGCATTACCGGCGAACTGCCCGTGCCCTGGGCTACCATCCTGTCATCCCTGTCGTACGGCGTGTTTTGCTTCGCTAAATACCCCCCGCACATTCCAGACTTCTTCAAGTCCACCCAACCCAACGGCTACACCCAGGACCGCACCGTATCGTTCGACAATGACGGCCAGTACGACGTGCGTGCCAAAGTGACGTATGAGAACGGTAAGCTATACAACCGCGTTAATGTGAAGGGCACTGGTTTCAATACG…	3	cgre36_1183	E6	65
MTEPPEGAKLFDEEIPYITELEGDVEGMKFIIMGVGTGDATTGTIKAKYICTTGGLPVPWATILSSLSYGVFCFAKYPPHIADFFKSTQPDGYSQDRTISFDDDGQFDVRARVTYEKGTLYNRVTVKGTGFNSNGNILGMRISHHSPPHVVYVMPDRMNGGMKIEYNMVFEVLGGGHQMARHAQFNRPLGVWEDVYPQYHHLTVWTSCGKDPADGDTDHLTIVEVIKAVDLETYR*	A2E:L3P:T4P:E11D:K12E:K32M:E34V:D54G:R78P:I97T:N102D:Y106F:K109R:K111R:N116K:K131N:V141I:L142S:Y143H:A149V:I152V:L153M:K157M:K167M:A168V:D170E:M172L:K186R:A190V:E193D:D194V:L197Q:F207C:D212A:D214G:E215D	A2E:L3P:T4P:E11D:K12E:K32M:E34V:D54G:R78P:I100T:N105D:Y109F:K112R:K114R:N119K:K134N:V144I:L145S:Y146H:A152V:I155V:L156M:K160M:K170M:A171V:D173E:M175L:K189R:A193V:E196D:D197V:L203Q:F213C:D218A:D220G:E221D	cgre	36	23	6.5099974	5.919521	ATGACTGAACCCCCTGAAGGCGCGAAGCTGTTCGACGAAGAGATTCCCTATATCACCGAGCTGGAGGGCGACGTAGAGGGCATGAAGTTCATCATTATGGGCGTGGGCACTGGCGATGCCACCACGGGCACCATCAAGGCGAAGTACATCTGCACCACCGGCGGGCTGCCCGTGCCCTGGGCTACCATCCTGTCATCCCTGTCGTACGGCGTGTTTTGCTTCGCTAAATACCCCCCACACATTGCGGACTTCTTCAAGTCCACCCAACCCGATGGCTACAGTCAGGACCGCACTATCTCGTTCGACGACGACGGCCAGTTCGACGTGCGTGCCCGTGTGACGTATGAGAAGGGTACACTATACAACCGCGTTACCGTGAAGGGCACTGGTTTCAATTCA…	3	cgre36_1303	F6	43
MAERPGGAKLFDEEIPYITELEGDVEGMKFFIKGEGTGDATTGTIKAKYICATGDLPVPWASILSSLSYGVFCFAKYPPHIVDFFKSTQPEGYSQDRIITFDNDGQFDVKAKVTYEKGALYNRATVKGTGFKSNGNILGMRVLHRSPPHVVYVLPDHNNGGMRIEYNMVFDVVGGDHQMARHSQFNRPLGAWEDDYPQYHHLTVWTSCGKDPDDGDTDHLTIVEVIKAVDLETYR*	T1A:A2E:L3R:T4P:E5G:E11D:K12E:I30F:T51A:T61S:R78P:A81V:D90E:S99T:Y106F:N116K:T118A:V123A:Y143H:H144R:A149V:I152V:R156H:K157N:K162R:K167M:A168V:M172V:G175D:A182S:K186R:E193D:L197Q:F207C:D214G:E215D	T1A:A2E:L3R:T4P:E5G:E11D:K12E:I30F:T51A:T61S:R78P:A81V:D93E:S102T:Y109F:N119K:T121A:V126A:Y146H:H147R:A152V:I155V:R159H:K160N:K165R:K170M:A171V:M175V:G178D:A185S:K189R:E196D:L203Q:F213C:D220G:E221D	cgre	36	20	6.5694413	5.658149	ATGGCCGAGCGGCCTGGAGGCGCGAAGCTGTTCGACGAGGAGATTCCCTATATCACCGAGCTGGAGGGCGACGTAGAGGGCATGAAGTTCTTTATTAAGGGCGAGGGCACTGGCGATGCCACCACGGGCACCATCAAGGCGAAGTACATCTGCGCAACCGGCGACCTGCCCGTGCCCTGGGCTTCTATCCTGTCATCCCTGTCGTACGGCGTGTTTTGCTTCGCTAAATACCCCCCCCACATTGTCGACTTCTTCAAGTCCACCCAACCCGAAGGCTACAGTCAGGACCGCATCATCACTTTCGACAATGACGGCCAGTTTGACGTGAAAGCCAAAGTGACGTATGAGAAAGGTGCCCTATACAACCGCGCCACCGTGAAGGGCACTGGTTTCAAGTCA…	3	cgre36_1578	G6	5
MTEPPEGAKLFDKEIPYITELEGDVEGMKFTIMGVGTGDATTGTIKAKYICTTGVMPVPWASILSSLSYGVFCFAQYPRHIVDFFKSTQPDGYSQDRIITFDDDGQFDVKAKVTYENGKLYNRVAMKGTGFNSNGNILGMRVSHHSPPHVVYVLPDHKNGGLKIEYNMAFDVMGGDHQMARHSQFNKPLGAWVEVYPQYHHLTVWTSCGKDPDDYDTDHLTIIEVIRAVDLETYR*	A2E:L3P:T4P:E11D:I30T:K32M:E34V:D54V:L55M:T61S:K75Q:A81V:S99T:N102D:Y106F:T118K:T124A:V125M:K131N:L142S:Y143H:A149V:I152V:R156H:M161L:K167M:G175D:A182S:E192V:D194V:L197Q:F207C:D214Y:E215D:V222I:K226R	A2E:L3P:T4P:E11D:I30T:K32M:E34V:D54V:L55M:T61S:K75Q:A81V:S102T:N105D:Y109F:T121K:T127A:V128M:K134N:L145S:Y146H:A152V:I155V:R159H:M164L:K170M:G178D:A185S:E195V:D197V:L203Q:F213C:D220Y:E221D:V228I:K232R	cgre	36	21	6.7319074	5.8513346	ATGACTGAGCCCCCAGAAGGCGCGAAGCTGTTCGATAAAGAGATTCCCTATATCACCGAGCTGGAGGGCGACGTAGAGGGCATGAAGTTCACGATTATGGGCGTCGGCACTGGCGATGCCACCACGGGCACCATCAAGGCGAAGTACATCTGCACCACCGGCGTAATGCCCGTGCCCTGGGCTAGTATCCTGTCATCCCTGTCGTACGGCGTGTTTTGCTTCGCTCAATACCCCCGCCACATTGTCGACTTCTTCAAGTCCACCCAACCCGATGGCTACAGTCAGGACCGCATCATCACGTTCGACGACGACGGCCAGTTTGACGTGAAAGCCAAAGTGACGTATGAGAACGGTAAGCTATACAACCGCGTTGCTATGAAGGGCACTGGTTTCAATTCA…	3	cgre36_1644	H6	66
MTELPGAAMLFAKEIPYVTELEGDVEGKKFIVNGVGTGDATTGTIKAKYICTTGEMPVPWASILSSLSYGVFCFAKYPPHIVDFFKSTQPDGYTQDRTISFDNDGHYNVKAKVTYEDGKLYNRVILKGTGFNSKGNILGMRVSFRSPPHVVYVLPDRNNGGMRIEYNKAFEVLGGGHQMARHSQFNKPLGVWEEDYPQYHHLTVWTSVGKDPADYKTDHLTIVEVIKAVDLETYR*	A2E:T4P:E5G:G6A:K8M:E11A:I17V:M27K:I31V:K32N:E34V:D54E:L55M:T61S:R78P:A81V:S93T:I97T:Q105H:D107N:N116D:T118K:T124I:V125L:K131N:N133K:L142S:Y143F:H144R:A149V:I152V:K157N:K162R:D170E:M172L:A182S:A190V:L197Q:F207V:D212A:D214Y:E215K	A2E:T4P:E5G:G6A:K8M:E11A:I17V:M27K:I31V:K32N:E34V:D54E:L55M:T61S:R78P:A81V:S96T:I100T:Q108H:D110N:N119D:T121K:T127I:V128L:K134N:N136K:L145S:Y146F:H147R:A152V:I155V:K160N:K165R:D173E:M175L:A185S:A193V:L203Q:F213V:D218A:D220Y:E221K	cgre	42	14	6.765602	5.9898996	ATGACTGAGCTTCCCGGTGCTGCGATGCTGTTCGCTAAAGAGATTCCCTATGTTACCGAGCTGGAGGGCGACGTAGAGGGCAAGAAGTTCATCGTTAATGGCGTCGGCACTGGCGATGCCACCACGGGCACCATCAAGGCGAAGTACATCTGCACCACCGGCGAAATGCCCGTGCCCTGGGCTAGCATCCTGTCATCCCTGTCGTACGGCGTGTTTTGCTTCGCTAAATACCCCCCACACATTGTGGACTTCTTCAAGTCCACCCAACCCGATGGCTACACACAGGACCGCACAATCTCGTTCGACAATGACGGCCACTACAACGTGAAAGCCAAAGTGACGTATGAGGATGGTAAACTATACAACCGCGTTATTTTGAAGGGCACTGGTTTCAATTCA…	3	cgre42_13	A7	145
MTELSVGAKLFDREIPYITELVGEVEGMKFIVRGEGTGNATTGTIKAKYICTTGELPVPWATVLSSLSYGVFCFAQYPPHIVDFFKSTQPDGYTQDRIITFDNDGQYEVKAKVRYEDGTLYNRVNVKGTGFNSNGNILGMRVLHHSPPHSVYVMPDRENGGMKIEYNMTFELLGGDHQMARHSQLNKPLGAWEEDYPVYHHLTVWTSVGKDAADYDTDHLTIVEVIRAVDLETYR*	A2E:T4S:E5V:E11D:K12R:E21V:D23E:I31V:K32R:D38N:D54E:I62V:K75Q:R78P:A81V:S93T:S99T:D107E:T113R:N116D:T124N:K131N:Y143H:A149S:I152V:L153M:K157E:K167M:A168T:D170E:V171L:M172L:G175D:A182S:F184L:L197V:F207V:P211A:D212A:D214Y:E215D:K226R	A2E:T4S:E5V:E11D:K12R:E21V:D23E:I31V:K32R:D38N:D54E:I62V:K75Q:R78P:A81V:S96T:S102T:D110E:T116R:N119D:T127N:K134N:Y146H:A152S:I155V:L156M:K160E:K170M:A171T:D173E:V174L:M175L:G178D:A185S:F187L:L203V:F213V:P217A:D218A:D220Y:E221D:K232R	cgre	42	11	6.7422605	5.7260866	ATGACTGAACTTTCAGTGGGCGCGAAGCTGTTCGATCGCGAGATTCCCTATATCACCGAGCTGGTTGGCGAAGTAGAGGGCATGAAGTTCATCGTTCGCGGCGAGGGCACTGGCAATGCCACCACGGGCACCATCAAGGCGAAGTACATCTGCACCACCGGCGAACTGCCCGTGCCCTGGGCTACCGTCCTGTCATCCCTGTCGTACGGCGTGTTTTGCTTCGCTCAATACCCCCCACACATTGTAGACTTCTTCAAGTCCACCCAACCCGATGGCTACACCCAGGACCGCATCATCACCTTCGACAATGACGGCCAGTACGAGGTGAAAGCCAAAGTGCGCTATGAGGACGGTACACTATACAACCGCGTTAATGTGAAGGGCACTGGTTTCAACTCA…	3	cgre42_196	B7	8
MIEPPGGAKLFEEEIPYVTELEGDVEGMKFSIKGVGTGDATTGTIKAKFICTTGVMPVPWATILSSLSYGVFCFAKSPRHIPDFFKSTQPDGYTQDRIITFDDDGQYNVKAKVTYENGKVYNRVAVKGTGFNTKGNILGMRVMYHSPPHVVYVLPDRKNGGLKIEYNMVFEVLGGDYQMARHSQLNKPLGVWEEDYPPYHHLTVWTSVGKDPADDDTDHLKIVEVIKAVDLETYR*	T1I:A2E:L3P:T4P:E5G:K12E:I17V:I30S:E34V:Y48F:D54V:L55M:Y76S:A81P:S93T:S99T:N102D:D107N:T118K:L119V:T124A:K131N:S132T:N133K:L142M:A149V:I152V:M161L:K167M:A168V:D170E:M172L:G175D:H176Y:A182S:F184L:A190V:L197P:F207V:D212A:E215D:T220K	T1I:A2E:L3P:T4P:E5G:K12E:I17V:I30S:E34V:Y48F:D54V:L55M:Y76S:A81P:S96T:S102T:N105D:D110N:T121K:L122V:T127A:K134N:S135T:N136K:L145M:A152V:I155V:M164L:K170M:A171V:D173E:M175L:G178D:H179Y:A185S:F187L:A193V:L203P:F213V:D218A:E221D:T226K	cgre	42	15	6.9200974	5.902707	ATGATTGAACCACCCGGCGGCGCGAAGCTGTTCGAAGAAGAGATTCCCTATGTGACCGAGCTGGAGGGCGACGTAGAGGGCATGAAGTTCTCGATTAAGGGCGTCGGCACTGGCGATGCCACCACGGGCACCATCAAGGCGAAGTTTATCTGCACCACCGGCGTAATGCCCGTGCCCTGGGCTACCATCCTGTCATCCCTGTCGTACGGCGTGTTTTGCTTCGCTAAAAGTCCCCGCCACATTCCGGACTTCTTCAAGTCCACCCAACCCGATGGCTACACCCAGGACCGCATCATCACGTTCGACGATGACGGCCAGTACAACGTGAAAGCCAAAGTGACGTATGAGAACGGTAAAGTTTACAACCGCGTTGCTGTGAAGGGCACTGGTTTCAACACT…	3	cgre42_357	C7	56
MTEFPGGAKLFDEEIPYITELEGDVEGMKFSIKGVGTGNATTGTIKAKYICTTGELPVPWASILSSMSYGVFCFAKYPPHIVDFFKSTQPDGYTQDRIITFDNDGQFDVKAKVTFENGRLYNRVTLKGTGFNTNGNILGMRISYYSPPHVVYVLPDRNNGGLRIEYNMAFELLGGDHQIARHSQFNKPLGAWVEDYPVYHHLTVWTSFGKDADDDDTDHLKIVEVIKAVDLETYR*	A2E:L3F:T4P:E5G:E11D:K12E:I30S:E34V:D38N:D54E:T61S:L66M:R78P:A81V:S93T:S99T:Y106F:Y114F:T118R:V125L:K131N:S132T:V141I:L142S:H144Y:A149V:I152V:K157N:M161L:K162R:K167M:D170E:V171L:M172L:G175D:M178I:A182S:E192V:L197V:P211A:E215D:T220K	A2E:L3F:T4P:E5G:E11D:K12E:I30S:E34V:D38N:D54E:T61S:L66M:R78P:A81V:S96T:S102T:Y109F:Y117F:T121R:V128L:K134N:S135T:V144I:L145S:H147Y:A152V:I155V:K160N:M164L:K165R:K170M:D173E:V174L:M175L:G178D:M181I:A185S:E195V:L203V:P217A:E221D:T226K	cgre	42	11	7.197618	6.102137	ATGACTGAGTTCCCTGGGGGCGCGAAGCTGTTCGATGAAGAGATTCCCTATATCACCGAGCTGGAGGGCGACGTAGAGGGCATGAAGTTCTCAATTAAGGGCGTGGGCACTGGCAATGCCACCACGGGCACCATCAAGGCGAAGTACATCTGCACCACCGGCGAGCTGCCCGTGCCCTGGGCTAGTATCCTGTCATCCATGTCGTACGGCGTGTTTTGCTTCGCTAAATACCCCCCCCACATTGTTGACTTCTTCAAGTCCACCCAACCCGATGGCTACACCCAGGACCGCATCATCACATTCGACAATGACGGCCAGTTTGACGTGAAAGCCAAAGTGACGTTCGAGAACGGTCGGCTATACAACCGCGTTACCCTGAAGGGCACTGGTTTCAACACA…	3	cgre42_814	D7	166
MTEITVGAKLFDEEIPYVTELEGDVEGMKFIIKGVGTGNPTTGTIRAKYICTTGELPVPWASILSSLSYGVFCFAQYPPHIPDFFKATQPYGYSQDRIISFDNDGEFNVKAKVTYENGKIYNRVNLKGTGFNSKGNILGMRVLHHSPPHVVYILPDRENGGMKIEFNMAFEVLGGGHQMARHSQFNKPLGAWKEEYPQYHHLTVWTSVGKDPDDYDTDHLKIVEVIRAVDLETYR*	A2E:L3I:E5V:E11D:K12E:I17V:E34V:D38N:A39P:K45R:D54E:T61S:K75Q:R78P:A81P:S86A:D90Y:Q105E:Y106F:D107N:T118K:L119I:T124N:V125L:K131N:N133K:Y143H:A149V:K157E:Y165F:K167M:D170E:M172L:A182S:E192K:D194E:L197Q:F207V:D214Y:E215D:T220K:K226R	A2E:L3I:E5V:E11D:K12E:I17V:E34V:D38N:A39P:K45R:D54E:T61S:K75Q:R78P:A81P:S88A:D93Y:Q108E:Y109F:D110N:T121K:L122I:T127N:V128L:K134N:N136K:Y146H:A152V:K160E:Y168F:K170M:D173E:M175L:A185S:E195K:D197E:L203Q:F213V:D220Y:E221D:T226K:K232R	cgre	42	16	7.1884284	5.9945545	ATGACTGAAATCACCGTCGGCGCGAAGCTGTTCGACGAGGAGATTCCCTATGTTACCGAGCTGGAGGGCGACGTAGAGGGCATGAAGTTCATCATTAAGGGCGTGGGCACTGGCAACCCAACCACGGGCACCATCCGCGCGAAGTACATCTGCACCACCGGCGAGCTGCCCGTGCCCTGGGCTAGCATCCTGTCATCCCTGTCGTACGGCGTGTTTTGCTTCGCTCAGTACCCCCCGCACATTCCTGACTTCTTCAAGGCCACCCAACCCTATGGCTACAGTCAGGACCGCATCATCTCGTTCGACAATGACGGCGAGTTTAACGTGAAAGCCAAAGTGACGTATGAGAACGGTAAGATATACAACCGCGTTAACCTCAAGGGCACTGGTTTCAACTCA…	3	cgre42_911	E7	118
MAVLPEGAKLFDEEIPYITVLEGDVEGMKFTIKGVGTGDATSGTIKAKYICATGGMPVPWATILSSLSYGVFCFAKYPPHITDFFKSTQPYGYSQDRIVTFDNDGHYNVKAKVTFEKGTLYNRVNVKGTGFNPSGNILGMRVSCRSPPHAVYILPDHTNGGLMIEYNMVFDLLGGGHQMARHSQFNKPLGVWGEDYPQYHHLTVWTSFGKDPDDDDTDHLTIVEVIKAIDLETYR*	T1A:A2V:T4P:E11D:K12E:E19V:I30T:E34V:T41S:T51A:D54G:L55M:R78P:A81T:D90Y:I98V:S99T:Q105H:D107N:Y114F:N116K:T124N:K131N:S132P:N133S:L142S:Y143C:H144R:R156H:K157T:M161L:K162M:K167M:A168V:V171L:M172L:A182S:A190V:E192G:L197Q:E215D:V228I	T1A:A2V:T4P:E11D:K12E:E19V:I30T:E34V:T41S:T51A:D54G:L55M:R78P:A81T:D93Y:I101V:S102T:Q108H:D110N:Y117F:N119K:T127N:K134N:S135P:N136S:L145S:Y146C:H147R:R159H:K160T:M164L:K165M:K170M:A171V:V174L:M175L:A185S:A193V:E195G:L203Q:E221D:V234I	cgre	42	27	6.2140274	5.198045	ATGGCGGTTCTTCCGGAAGGCGCGAAGCTGTTCGATGAGGAGATTCCCTATATCACCGTGCTGGAGGGCGACGTAGAGGGCATGAAGTTCACGATTAAGGGCGTGGGCACTGGCGATGCCACCTCAGGCACCATCAAGGCGAAGTACATCTGCGCGACCGGCGGCATGCCCGTGCCCTGGGCTACCATCCTGTCATCCCTGTCGTACGGCGTGTTTTGCTTCGCTAAATACCCCCCTCACATTACCGACTTCTTCAAGTCCACCCAACCCTACGGCTACAGTCAGGACCGCATCGTCACGTTCGACAATGACGGCCATTACAACGTGAAAGCCAAAGTGACGTTCGAGAAAGGTACACTATACAACCGCGTTAACGTGAAGGGCACTGGTTTCAATCCG…	3	cgre42_1054	F7	4
MSSLPEGAMLFENKIPYITELEGEIEGMKFVIKGVGTGDAATGTIKAKYICATGNMPVPWATILSSLSYGVFCFAQYPRHIPDFFKSTQPYGYTQDRVITFDNDGHYNVRAKVTFEKGTLYNRVNMKGTGFKTSGNILGMRVLNHSPPHAVYILPDRRNGGLKIEYNMVFGVMGGGHQMARHAQFNKPLGAWEDDYPQYHHLTVWTCCGKDPDDHDTDHLTIFEVIKAVDLETYR*	T1S:A2S:T4P:K8M:K12N:E13K:D23E:V24I:I30V:E34V:T40A:T51A:D54N:L55M:K75Q:A81P:D90Y:S93T:I97V:S99T:Q105H:D107N:K109R:Y114F:N116K:T124N:V125M:S132T:N133S:Y143N:K157R:M161L:K167M:A168V:D170G:E193D:L197Q:S206C:F207C:D214H:E215D:V222F	T1S:A2S:T4P:K8M:K12N:E13K:D23E:V24I:I30V:E34V:T40A:T51A:D54N:L55M:K75Q:A81P:D93Y:S96T:I100V:S102T:Q108H:D110N:K112R:Y117F:N119K:T127N:V128M:S135T:N136S:Y146N:K160R:M164L:K170M:A171V:D173G:E196D:L203Q:S212C:F213C:D220H:E221D:V228F	cgre	42	19	6.1476336	4.972002	ATGTCCTCTCTTCCGGAAGGCGCGATGCTGTTCGAAAACAAGATTCCCTATATCACCGAGCTGGAGGGCGAGATTGAGGGCATGAAGTTCGTCATTAAGGGCGTCGGCACTGGCGATGCCGCTACGGGCACCATCAAGGCGAAGTACATCTGCGCTACCGGCAACATGCCCGTGCCCTGGGCTACCATCCTGTCATCCCTGTCGTACGGCGTGTTTTGCTTCGCTCAGTACCCCCGCCACATTCCAGACTTCTTCAAGTCCACCCAACCCTACGGCTACACTCAGGACCGCGTTATCACATTCGACAATGACGGCCACTACAACGTGCGCGCCAAAGTGACGTTTGAGAAGGGTACACTATACAACCGCGTTAATATGAAGGGCACTGGTTTCAAGACA…	3	cgre42_1080	G7	4
MTERTVGAKLFDEEIPYITELEGDVEGMKFTIRGVGTGDATTGTIKAKYICTTGGMPVPWATILSSLSYGVFCFAKYPPHITDFFKSTQPDGYTQDRIISFDDDGQFDVKAKVTYENGILYNRVAMKGTGFNSYGNVLGMRVSHRSPPHVVYVMPDRRNGGMMIEFNMVFDVLGGDHQMARHSQFNKPLGVWVEDYPQYHHLTVWTSCGKDPDDNDTDHLTIIEVIKAVDLETYR*	A2E:L3R:E5V:E11D:K12E:I30T:K32R:E34V:D54G:L55M:R78P:A81T:S93T:N102D:Y106F:T118I:T124A:V125M:K131N:N133Y:I136V:L142S:Y143H:H144R:A149V:I152V:L153M:K157R:K162M:Y165F:K167M:A168V:M172L:G175D:A182S:A190V:E192V:L197Q:F207C:D214N:E215D:V222I	A2E:L3R:E5V:E11D:K12E:I30T:K32R:E34V:D54G:L55M:R78P:A81T:S96T:N105D:Y109F:T121I:T127A:V128M:K134N:N136Y:I139V:L145S:Y146H:H147R:A152V:I155V:L156M:K160R:K165M:Y168F:K170M:A171V:M175L:G178D:A185S:A193V:E195V:L203Q:F213C:D220N:E221D:V228I	cgre	42	23	6.6684217	6.005429	ATGACTGAGCGGACCGTCGGCGCGAAGCTGTTCGATGAGGAGATTCCCTATATCACCGAGCTGGAGGGCGACGTAGAGGGCATGAAGTTCACAATTCGCGGCGTCGGCACTGGCGATGCCACCACGGGCACCATCAAGGCGAAGTACATCTGCACCACCGGCGGTATGCCCGTGCCCTGGGCTACCATCCTGTCATCCCTGTCGTACGGCGTGTTTTGCTTCGCTAAATACCCCCCTCACATTACGGACTTCTTCAAGTCCACCCAACCCGATGGCTACACGCAGGACCGCATCATCTCGTTCGACGACGACGGCCAGTTCGACGTGAAAGCCAAAGTGACGTATGAGAACGGTATTCTATACAACCGCGTTGCAATGAAGGGCACTGGTTTCAACTCA…	3	cgre42_1201	H7	38
MTEPPEGAKLFDKEVPYITELEGDVEGMKFIIMGVGTGDAATGTIKAKYTCITGVMPVPWATILSSLSYGVFCFAKYPRHIPDFFKSTQPEGYTQDRIVTFDNDGQYDVKAKVTYEKGTLYNRVTMKGTGFNSNGNILGMRVSHHSPPHVVYVMPDRKNGGMKIEYNMVFELLGGGHEMARHSQFNRPLGAWVGDYPQYHHLTVWTSCGKDPGDDDTDHLKIIEVIKAVDLKTYR*	A2E:L3P:T4P:E11D:I14V:K32M:E34V:T40A:I49T:T51I:D54V:L55M:A81P:D90E:S93T:I98V:S99T:N116K:V125M:K131N:L142S:Y143H:A149V:I152V:L153M:K167M:A168V:D170E:V171L:M172L:Q177E:A182S:K186R:E192V:E193G:L197Q:F207C:D212G:E215D:T220K:V222I:E231K	A2E:L3P:T4P:E11D:I14V:K32M:E34V:T40A:I49T:T51I:D54V:L55M:A81P:D93E:S96T:I101V:S102T:N119K:V128M:K134N:L145S:Y146H:A152V:I155V:L156M:K170M:A171V:D173E:V174L:M175L:Q180E:A185S:K189R:E195V:E196G:L203Q:F213C:D218G:E221D:T226K:V228I:E239K	cgre	42	22	6.26504	5.609513	ATGACTGAACCTCCCGAAGGCGCGAAGCTGTTCGACAAAGAGGTACCCTATATCACCGAGCTGGAGGGCGACGTAGAGGGCATGAAGTTCATCATTATGGGCGTAGGCACTGGCGATGCCGCTACGGGCACCATCAAGGCGAAGTACACTTGCATTACCGGCGTTATGCCCGTGCCCTGGGCTACCATCCTGTCATCCCTGTCGTACGGCGTGTTTTGCTTCGCTAAATACCCCCGCCACATTCCGGACTTCTTCAAGTCCACCCAACCCGAGGGCTACACCCAGGACCGCATCGTCACGTTCGACAATGACGGCCAGTACGACGTGAAAGCCAAAGTGACGTATGAGAAAGGTACACTATACAACCGCGTTACCATGAAGGGCACTGGTTTCAACTCA…	3	cgre42_1498	A8	4
MAERPVGAKLFDKEIPYITELEGDVEGMKFTIKGVGTGDATTGTIKAKYTCTTGYMPVPWATILSSLSYGVFCFAQYPPHIPDFFKATQPDGYSQNRTITFDDDGQYNVRAKVTYEDGTLYNRATMKGTGFNSNGNILGMRISHRSPPHVVYVLPDRKNGGMKIEYIKAFGVLGGGHQMARHAQFNKPLGAWVDDYPQYHHLTVWTSVGKDPDDHDTDHLKIIEVIKAVDLETYR*	T1A:A2E:L3R:T4P:E5V:E11D:I30T:E34V:I49T:D54Y:L55M:K75Q:R78P:A81P:S86A:D95N:I97T:S99T:N102D:D107N:K109R:N116D:V123A:V125M:K131N:V141I:L142S:Y143H:H144R:A149V:I152V:N166I:D170G:M172L:E192V:E193D:L197Q:F207V:D214H:E215D:T220K:V222I	T1A:A2E:L3R:T4P:E5V:E11D:I30T:E34V:I49T:D54Y:L55M:K75Q:R78P:A81P:S88A:D98N:I100T:S102T:N105D:D110N:K112R:N119D:V126A:V128M:K134N:V144I:L145S:Y146H:H147R:A152V:I155V:N169I:D173G:M175L:E195V:E196D:L203Q:F213V:D220H:E221D:T226K:V228I	cgre	42	23	6.6792006	5.997037	ATGGCGGAACGGCCTGTAGGCGCGAAGCTGTTCGACAAAGAGATTCCCTATATCACCGAGCTGGAGGGCGACGTAGAGGGCATGAAGTTCACCATTAAGGGCGTGGGCACTGGCGATGCCACCACGGGCACCATCAAGGCGAAGTACACTTGCACCACCGGCTACATGCCCGTGCCCTGGGCTACCATCCTGTCATCCCTGTCGTACGGCGTGTTTTGCTTCGCTCAATACCCCCCGCACATTCCTGACTTCTTCAAGGCTACCCAACCCGATGGCTACAGTCAGAATCGCACCATCACCTTCGACGACGACGGCCAGTACAACGTGCGTGCCAAAGTGACGTATGAGGATGGTACACTATACAACCGCGCCACCATGAAGGGCACTGGTTTCAACTCA…	3	cgre42_1604	B8	4
MIEPPKGAKLFDEEIPYITELEGDIEGMKFTVRGVGTGDAATGTIKAKYICTTGELPVPWASILSSLSYGVFCFAKSPLHIVDFFKSTQPDGYSQDRIITFDNDGQYDVKAKVTYEKGTLYNRATLKGTGFNLNGNILGKRVLHHSPPHAVYVLPDHKNGGLMIEFNMAFEVMGGGHQMARHSQFNRPLGVWGDDYPQYHHLTVWTSCGKDPDDDDTDHLTIIEVIKAVDLETYR*	T1I:A2E:L3P:T4P:E5K:E11D:K12E:V24I:I30T:I31V:K32R:E34V:T40A:D54E:T61S:Y76S:R78L:A81V:S99T:N116K:V123A:V125L:K131N:S132L:M139K:Y143H:I152V:R156H:M161L:K162M:Y165F:K167M:D170E:A182S:K186R:A190V:E192G:E193D:L197Q:F207C:E215D:V222I	T1I:A2E:L3P:T4P:E5K:E11D:K12E:V24I:I30T:I31V:K32R:E34V:T40A:D54E:T61S:Y76S:R78L:A81V:S102T:N119K:V126A:V128L:K134N:S135L:M142K:Y146H:I155V:R159H:M164L:K165M:Y168F:K170M:D173E:A185S:K189R:A193V:E195G:E196D:L203Q:F213C:E221D:V228I	cgre	42	19	7.0003796	5.881975	ATGATTGAACCTCCTAAAGGCGCGAAGCTGTTCGACGAGGAGATTCCCTATATCACCGAGCTGGAGGGCGACATAGAGGGCATGAAGTTCACCGTTCGGGGCGTAGGCACTGGCGATGCCGCGACGGGCACCATCAAGGCGAAGTACATCTGCACCACCGGCGAGCTGCCCGTGCCCTGGGCTTCCATCCTGTCATCCCTGTCGTACGGCGTGTTTTGCTTCGCTAAATCGCCCTTGCACATTGTAGACTTCTTCAAGTCCACCCAACCCGATGGCTACAGTCAGGACCGCATCATCACTTTCGACAATGACGGCCAGTACGACGTGAAAGCCAAAGTGACGTATGAGAAAGGTACACTATACAACCGCGCTACCTTGAAGGGCACTGGTTTCAATTTA…	3	cgre42_1754	C8	65
MTEPPGGAKLFDKEIPYITELEGDVEGMKFTVKGVGTGDAATGTIKAKYICATGDMPVPWASILSSLSYGVFCFAQYPPHIVDFFKSTQPEGYSQDRIISFDDDGQFDVKAKVTFENGKLYNRVAMKGTGFNSNGNILGMRISYRSPPHVVYILPDRKNGGLKVEYNMVFEVMGGGHQMARHAQLNRPLGVWEGVYPQYHHLTVWTSVGKDPGDGDTDHLTIVEVIKAVDLETYR*	A2E:L3P:T4P:E5G:E11D:I30T:I31V:E34V:T40A:T51A:L55M:T61S:K75Q:R78P:A81V:D90E:N102D:Y106F:Y114F:T118K:T124A:V125M:K131N:V141I:L142S:H144R:A149V:M161L:I163V:K167M:A168V:D170E:F184L:K186R:A190V:E193G:D194V:L197Q:F207V:D212G:D214G:E215D	A2E:L3P:T4P:E5G:E11D:I30T:I31V:E34V:T40A:T51A:L55M:T61S:K75Q:R78P:A81V:D93E:N105D:Y109F:Y117F:T121K:T127A:V128M:K134N:V144I:L145S:H147R:A152V:M164L:I166V:K170M:A171V:D173E:F187L:K189R:A193V:E196G:D197V:L203Q:F213V:D218G:D220G:E221D	cgre	42	24	6.7806387	5.8141603	ATGACTGAACCGCCGGGTGGCGCGAAGCTGTTCGATAAAGAGATTCCCTATATCACCGAGCTGGAGGGCGACGTAGAGGGCATGAAGTTCACAGTGAAGGGCGTCGGCACTGGCGATGCCGCCACGGGCACCATCAAGGCGAAGTACATCTGCGCGACCGGCGACATGCCCGTGCCCTGGGCTAGTATCCTGTCATCCCTGTCGTACGGCGTGTTTTGCTTCGCTCAGTACCCCCCTCACATTGTGGACTTCTTCAAGTCCACCCAACCCGAAGGCTACAGTCAGGACCGCATCATCTCGTTCGACGACGACGGCCAGTTTGACGTGAAAGCCAAAGTGACGTTTGAGAACGGTAAACTATACAACCGCGTTGCTATGAAGGGCACTGGTTTCAATTCA…	3	cgre42_2155	D8	16
MTEPPKGAKLFDKVIPYVTELVGDIEGMKFTIRGVGTGNATTGTIKAKYICITGELPVPWATILSSLSYGVFCFAQYPRHIPDFFKATQPGGYSQDRTIAFDNDGQYNVRARVTYENGKLYNRANMKGTGFNSNGNILGMRVMHHSPPHVVYIMPDHNNGGMRVEYNMVFEVLGGDHQIARHAQFNKPLGVWEEDYPVYHHLTVWTSVGKDADDDDTDHLTIVEVIKAVDLETYR*	A2E:L3P:T4P:E5K:E11D:E13V:I17V:E21V:V24I:I30T:K32R:E34V:D38N:T51I:D54E:K75Q:A81P:S86A:D90G:I97T:S99A:D107N:K109R:K111R:T118K:V123A:T124N:V125M:K131N:L142M:Y143H:A149V:L153M:R156H:K157N:K162R:I163V:K167M:A168V:D170E:M172L:G175D:M178I:A190V:L197V:F207V:P211A:E215D	A2E:L3P:T4P:E5K:E11D:E13V:I17V:E21V:V24I:I30T:K32R:E34V:D38N:T51I:D54E:K75Q:A81P:S88A:D93G:I100T:S102A:D110N:K112R:K114R:T121K:V126A:T127N:V128M:K134N:L145M:Y146H:A152V:L156M:R159H:K160N:K165R:I166V:K170M:A171V:D173E:M175L:G178D:M181I:A193V:L203V:F213V:P217A:E221D	cgre	48	14	6.927539	6.049897	ATGACTGAGCCGCCTAAAGGCGCGAAGCTGTTCGACAAAGTGATTCCCTATGTCACCGAGCTGGTTGGCGACATCGAGGGCATGAAGTTCACTATTCGTGGCGTAGGCACTGGCAACGCCACCACGGGCACCATCAAGGCGAAGTACATCTGCATCACCGGCGAGCTGCCCGTGCCCTGGGCTACCATCCTGTCATCCCTGTCGTACGGCGTGTTTTGCTTCGCTCAATACCCCCGCCACATTCCTGACTTCTTCAAGGCGACCCAACCCGGCGGCTACAGTCAGGACCGCACAATCGCCTTCGACAATGACGGCCAGTACAACGTGCGCGCCCGGGTGACGTATGAGAACGGTAAGCTATACAACCGCGCCAATATGAAGGGCACTGGTTTCAATTCA…	3	cgre48_71	E8	4
MTELTEGAKLFDEEVPYVTELVGDVEGKKFSIRGVGTGDATTGTIKAKYICTTGELPVPWASLLSSLSYGVFCFAKYPPHIPDFFKATQPEGYSQDRIITFDNDGQYNVKAKVTFENGKLYNRVNMKGTGFNTNGNILGMRISHHSPPHVVYVMPDRKNGGLKIEFNMTFVLMGGDHQMARHSQLNRPLGAWKEVYPPYHHLTVWTSFGKDPDDYDTDHLKIIEVIKAVDLETYR*	A2E:E11D:K12E:I14V:I17V:E21V:M27K:I30S:K32R:E34V:D54E:T61S:I62L:R78P:A81P:S86A:D90E:S99T:D107N:Y114F:T118K:T124N:V125M:K131N:S132T:V141I:L142S:Y143H:A149V:I152V:L153M:M161L:Y165F:K167M:A168T:D170V:V171L:G175D:A182S:F184L:K186R:E192K:D194V:L197P:D214Y:E215D:T220K:V222I	A2E:E11D:K12E:I14V:I17V:E21V:M27K:I30S:K32R:E34V:D54E:T61S:I62L:R78P:A81P:S88A:D93E:S102T:D110N:Y117F:T121K:T127N:V128M:K134N:S135T:V144I:L145S:Y146H:A152V:I155V:L156M:M164L:Y168F:K170M:A171T:D173V:V174L:G178D:A185S:F187L:K189R:E195K:D197V:L203P:D220Y:E221D:T226K:V228I	cgre	48	14	7.24433	5.99438	ATGACTGAACTTACCGAAGGCGCGAAGCTGTTCGATGAAGAGGTACCCTATGTGACCGAGCTGGTTGGCGACGTAGAGGGCAAGAAGTTCTCGATTCGCGGCGTGGGCACTGGCGATGCCACCACGGGCACCATCAAGGCGAAGTACATCTGCACCACCGGCGAGCTGCCCGTGCCCTGGGCTTCGTTACTGTCATCCCTGTCGTACGGCGTGTTTTGCTTCGCTAAATACCCCCCTCACATTCCCGACTTCTTCAAGGCGACCCAACCCGAAGGCTACAGTCAGGACCGCATCATCACATTCGACAATGACGGCCAGTACAACGTGAAAGCCAAAGTGACGTTCGAGAACGGTAAGCTATACAACCGCGTTAATATGAAGGGCACTGGTTTCAATACT…	3	cgre48_152	F8	63
MTERPEGAMLFAKEVPYITELEGDVEGMKFIVRGVGTGNATTGTIKAKYICTSGELPVPWASILSSMSYGVFCFAKYPPHIADFFKSTQPEGYTQDRIITFDDDGEYDVKARVTYENGKLYNRVALKGTGFNTKGNILGMRIMHNSPPHVVYVLPDRNNGGLKIEFNMAFELLGGDHQMARHSQFNKPLGAWEEVYPQYHHLTVWTSVGKDPDDDKTDHLTIVEVIKAVDLKSYR*	A2E:L3R:T4P:K8M:E11A:I14V:I31V:K32R:E34V:D38N:T52S:D54E:T61S:L66M:R78P:D90E:S93T:S99T:N102D:Q105E:K111R:T118K:T124A:V125L:K131N:S132T:N133K:V141I:L142M:Y143H:H144N:A149V:I152V:K157N:M161L:Y165F:K167M:D170E:V171L:M172L:G175D:A182S:D194V:L197Q:F207V:E215K:E231K:T232S	A2E:L3R:T4P:K8M:E11A:I14V:I31V:K32R:E34V:D38N:T52S:D54E:T61S:L66M:R78P:D93E:S96T:S102T:N105D:Q108E:K114R:T121K:T127A:V128L:K134N:S135T:N136K:V144I:L145M:Y146H:H147N:A152V:I155V:K160N:M164L:Y168F:K170M:D173E:V174L:M175L:G178D:A185S:D197V:L203Q:F213V:E221K:E239K:T243S	cgre	48	11	7.5166154	5.958078	ATGACTGAACGGCCGGAAGGCGCGATGCTGTTCGCCAAAGAGGTACCCTATATCACCGAGCTGGAGGGCGACGTAGAGGGCATGAAGTTCATCGTTCGCGGCGTAGGCACTGGCAATGCCACCACGGGCACCATCAAGGCGAAGTACATCTGCACCAGCGGCGAGCTGCCCGTGCCCTGGGCTTCCATCCTGTCATCCATGTCGTACGGCGTGTTTTGCTTCGCTAAATACCCCCCCCACATTGCGGACTTCTTCAAGTCCACCCAACCCGAGGGCTACACCCAGGACCGCATCATCACGTTCGACGACGACGGCGAATACGACGTGAAAGCCCGTGTGACGTATGAGAACGGTAAACTATACAACCGCGTTGCATTGAAGGGCACTGGTTTCAACACT…	3	cgre48_278	G8	82
MTERTGGAKLFDKVIPYVTELEGNVEGMKFSIKGVGTGNAATGTIKAKYICATGEMPVPWATLLSSLSYGVFCFAQYPRHIADFFKATQPDGYTQDRIIAFDDDGKYDVKARVTYEDGKLYNRAIVKGTGFNSKGNILGMRILHHSPPHVVYVLPDRNNGGMRVEYNMVFELKGGGHQMARHSQFNRPLGAWVEDYPQYHHLTVWTSVGKDPDDYDTDHLTIIEVIKAVDLETYR*	A2E:L3R:E5G:E11D:E13V:I17V:D23N:I30S:E34V:D38N:T40A:T51A:D54E:L55M:I62L:K75Q:S86A:S93T:S99A:N102D:Q105K:K111R:N116D:T118K:V123A:T124I:K131N:N133K:V141I:Y143H:A149V:I152V:K157N:K162R:I163V:K167M:A168V:D170E:V171L:M172K:A182S:K186R:E192V:L197Q:F207V:D214Y:E215D:V222I	A2E:L3R:E5G:E11D:E13V:I17V:D23N:I30S:E34V:D38N:T40A:T51A:D54E:L55M:I62L:K75Q:S88A:S96T:S102A:N105D:Q108K:K114R:N119D:T121K:V126A:T127I:K134N:N136K:V144I:Y146H:A152V:I155V:K160N:K165R:I166V:K170M:A171V:D173E:V174L:M175K:A185S:K189R:E195V:L203Q:F213V:D220Y:E221D:V228I	cgre	48	14	7.241463	5.971289	ATGACTGAACGGACCGGAGGCGCGAAGCTGTTCGACAAAGTAATTCCCTATGTGACCGAGCTGGAGGGCAATGTAGAGGGCATGAAGTTCTCAATTAAGGGCGTCGGCACTGGCAACGCCGCAACGGGCACCATCAAGGCGAAGTACATCTGCGCAACCGGCGAAATGCCCGTGCCCTGGGCTACCCTGCTGTCATCCCTGTCGTACGGCGTGTTTTGCTTCGCTCAGTACCCCCGCCACATTGCGGACTTCTTCAAGGCTACCCAACCCGATGGCTACACCCAGGACCGCATCATCGCATTCGACGATGACGGCAAATACGACGTGAAAGCCCGTGTGACGTATGAGGACGGTAAGCTATACAACCGCGCTATCGTGAAGGGCACTGGTTTCAACTCA…	3	cgre48_385	H8	15
MTERTEGAKLFDNEIPYVTELEGDVEGMKFSVRGVGTGNATTGTIKAKYICTTGELPVPWATILSSLSYGVFCFAQYPPHIPDFFKATQPDGYTQDRIISFDNDGQYNVRARVTFEDGKLYNRVTVKGTGFNTKGNVLGMRVSHYSPPHSVYVLPDRNNGGMKIEFNMVFEVLGGDHQMARHSQFNKPLGVWVEDYPVYHHLTVWTSVGKDPDDADSDHLKIVEVIKAVDLESYR*	A2E:L3R:E11D:K12N:I17V:I30S:I31V:K32R:E34V:D38N:D54E:K75Q:R78P:A81P:S86A:S93T:D107N:K109R:K111R:Y114F:N116D:T118K:K131N:S132T:N133K:I136V:L142S:Y143H:H144Y:A149S:I152V:K157N:Y165F:K167M:A168V:D170E:M172L:G175D:A182S:A190V:E192V:L197V:F207V:D214A:E215D:T216S:T220K:T232S	A2E:L3R:E11D:K12N:I17V:I30S:I31V:K32R:E34V:D38N:D54E:K75Q:R78P:A81P:S88A:S96T:D110N:K112R:K114R:Y117F:N119D:T121K:K134N:S135T:N136K:I139V:L145S:Y146H:H147Y:A152S:I155V:K160N:Y168F:K170M:A171V:D173E:M175L:G178D:A185S:A193V:E195V:L203V:F213V:D220A:E221D:T222S:T226K:T243S	cgre	48	13	7.3529587	5.988208	ATGACTGAACGCACCGAAGGCGCGAAGCTGTTCGATAACGAGATTCCCTATGTGACCGAGCTGGAGGGCGACGTAGAGGGCATGAAGTTCAGTGTACGGGGCGTAGGCACTGGCAACGCCACCACGGGCACCATCAAGGCGAAGTACATCTGCACCACCGGCGAACTGCCCGTGCCCTGGGCTACCATCCTGTCATCCCTGTCGTACGGCGTGTTTTGCTTCGCTCAATACCCCCCGCACATTCCAGACTTCTTCAAGGCCACCCAACCCGATGGCTACACACAGGACCGCATCATCTCGTTCGACAATGACGGCCAGTACAATGTGCGGGCCCGTGTGACGTTCGAGGATGGTAAGCTATACAACCGCGTTACCGTGAAGGGCACTGGTTTCAACACG…	3	cgre48_567	A9	188
MIELAGGAKLFDEEIPYITELEGDVEGLKFIIRGVGTGDATTGTIKAKYICTTGELPVPWASILSSLSYGVFCFAKYPPHIADFFKSTQPDGYTQNRTITFDDDGKYNVKAKVTYENGKLYNRVNLKGTGFNLNGNILGMRIMHHSPPHVVYVLPDHNNGGLKIEYNMVFEVLGGDYQMARHSQINRPLGAWEDDFPQYHHLTVWTSCGKDPADDDTDHLKIVEVIKAVDLETYR*	T1I:A2E:T4A:E5G:E11D:K12E:M27L:K32R:E34V:D54E:T61S:R78P:S93T:D95N:I97T:S99T:N102D:Q105K:D107N:T118K:T124N:V125L:K131N:S132L:V141I:L142M:Y143H:A149V:I152V:R156H:K157N:M161L:K167M:A168V:D170E:M172L:G175D:H176Y:A182S:F184I:K186R:E193D:Y195F:L197Q:F207C:D212A:E215D:T220K	T1I:A2E:T4A:E5G:E11D:K12E:M27L:K32R:E34V:D54E:T61S:R78P:S96T:D98N:I100T:S102T:N105D:Q108K:D110N:T121K:T127N:V128L:K134N:S135L:V144I:L145M:Y146H:A152V:I155V:R159H:K160N:M164L:K170M:A171V:D173E:M175L:G178D:H179Y:A185S:F187I:K189R:E196D:Y198F:L203Q:F213C:D218A:E221D:T226K	cgre	48	16	7.451174	5.9397345	ATGATTGAGCTTGCTGGGGGCGCGAAGCTGTTCGATGAGGAGATTCCCTATATCACCGAGCTGGAGGGCGACGTAGAGGGCTTAAAGTTCATCATTCGTGGCGTCGGCACTGGCGATGCCACCACGGGCACCATCAAGGCGAAGTACATCTGCACCACCGGCGAGCTGCCCGTGCCCTGGGCTTCTATCCTGTCATCCCTGTCGTACGGCGTGTTTTGCTTCGCTAAATACCCCCCTCACATTGCGGACTTCTTCAAGTCCACCCAACCCGATGGCTACACGCAGAATCGCACCATCACATTCGACGACGACGGCAAATACAACGTGAAAGCCAAAGTGACGTATGAGAACGGTAAGCTATACAACCGCGTTAATCTGAAGGGCACTGGTTTCAACCTG…	3	cgre48_691	B9	80
MTERPGGAMLFDEEIPYVTELEGDIEGMRFFIRGVGTGDATTGTIKAKYICTTGELPVPWASILSSLSYGVFCFAQYPRHITDFFKATQPDGYSQDRTISFDDDGQYDVKAKVTYENGTLYNRVNVKGTGFNTKGNILGMRISHHSPPHAVYVLPDRKNGGLRIEFNMAFELLGGDHQMARHSQFNKPLGVWDDDYPVYHHLTVWTSVGKDAGDADTDHLTIIEVIKAVDLKTYR*	A2E:L3R:T4P:E5G:K8M:E11D:K12E:I17V:V24I:K28R:I30F:K32R:E34V:D54E:T61S:K75Q:A81T:S86A:I97T:N102D:T124N:K131N:S132T:N133K:V141I:L142S:Y143H:I152V:M161L:K162R:Y165F:K167M:D170E:V171L:M172L:G175D:A182S:A190V:E192D:E193D:L197V:F207V:P211A:D212G:D214A:E215D:V222I:E231K	A2E:L3R:T4P:E5G:K8M:E11D:K12E:I17V:V24I:K28R:I30F:K32R:E34V:D54E:T61S:K75Q:A81T:S88A:I100T:N105D:T127N:K134N:S135T:N136K:V144I:L145S:Y146H:I155V:M164L:K165R:Y168F:K170M:D173E:V174L:M175L:G178D:A185S:A193V:E195D:E196D:L203V:F213V:P217A:D218G:D220A:E221D:V228I:E239K	cgre	48	16	7.405691	6.013712	ATGACTGAGCGCCCCGGGGGCGCGATGCTGTTCGATGAAGAGATTCCCTATGTCACCGAGCTGGAGGGCGACATTGAGGGCATGCGCTTCTTCATTCGTGGCGTGGGCACTGGCGATGCCACCACGGGCACCATCAAGGCGAAGTACATCTGCACCACCGGCGAGCTGCCCGTGCCCTGGGCTAGTATCCTGTCATCCCTGTCGTACGGCGTGTTTTGCTTCGCTCAGTACCCCCGCCACATTACGGACTTCTTCAAGGCTACCCAACCCGATGGCTACAGTCAGGACCGCACTATCTCGTTCGACGACGACGGCCAGTACGACGTGAAAGCCAAAGTGACGTATGAGAACGGTACACTATACAACCGCGTTAACGTGAAGGGCACTGGTTTCAACACG…	3	cgre48_970	C9	4
MTEPSVAAKLFEEEIPYITELEGDIDGKKFSIRGVGTGDAATGTIKAKYICATGELPVPWATILSSLSYGVFCFAQYPPHIPDFFKSTQPDGYTQDRTIAFDDDGQYNVKAKVTYENGKLYNRVILKGTGFNSKGNILGMRILYHSPPHSVYVLPDRNNGGMKIEFNMVFEVLGGGHQMARHSQFNKPLGAWVEDYPQYHHLTVWTRVGKDADDGDTDHLKILEVIKAVDVETYR*	A2E:L3P:T4S:E5V:G6A:K12E:V24I:E25D:M27K:I30S:K32R:E34V:T40A:T51A:D54E:K75Q:R78P:A81P:S93T:I97T:S99A:N102D:D107N:T118K:T124I:V125L:K131N:N133K:V141I:A149S:I152V:K157N:Y165F:K167M:A168V:D170E:M172L:A182S:E192V:L197Q:S206R:F207V:P211A:D214G:E215D:T220K:V222L:L230V	A2E:L3P:T4S:E5V:G6A:K12E:V24I:E25D:M27K:I30S:K32R:E34V:T40A:T51A:D54E:K75Q:R78P:A81P:S96T:I100T:S102A:N105D:D110N:T121K:T127I:V128L:K134N:N136K:V144I:A152S:I155V:K160N:Y168F:K170M:A171V:D173E:M175L:A185S:E195V:L203Q:S212R:F213V:P217A:D220G:E221D:T226K:V228L:L236V	cgre	48	12	7.048356	6.0827646	ATGACTGAACCGTCCGTGGCGGCGAAGCTGTTCGAAGAGGAGATTCCCTATATCACCGAGCTGGAGGGCGACATCGATGGCAAGAAGTTCAGCATTCGGGGCGTAGGCACTGGCGATGCCGCGACGGGCACCATCAAGGCGAAGTACATCTGCGCCACCGGCGAGCTGCCCGTGCCCTGGGCTACCATCCTGTCATCCCTGTCGTACGGCGTGTTTTGCTTCGCTCAGTACCCCCCCCACATTCCCGACTTCTTCAAGTCCACCCAACCCGATGGCTACACCCAGGACCGCACCATCGCCTTCGACGACGACGGCCAGTACAACGTGAAAGCCAAAGTGACGTATGAGAACGGTAAACTATACAACCGCGTTATACTGAAGGGCACTGGTTTCAATTCA…	3	cgre48_1050	D9	48
MTEPPGGAKLFDEEIPYITVLEGDVEGMKFTIRGVGTGNATTGTIKAKYICATGGMPVPWATILSSMSYGVFCFAQYPPHIVDFFKSTQPDGYTQDRTITFDDDGQFDVRARVTYENGTLFNRATLKGTGFNTNGNILGMRILHRSPPHVVYVLPDHKNGGLKIEYNMAFDLLGGGHQMARHTQFNRPLGVWKDDYPQYHHLTVWTSCGKDPDDDDTDHLTIVEVIKAVDLETYR*	A2E:L3P:T4P:E5G:E11D:K12E:E19V:I30T:K32R:E34V:D38N:T51A:D54G:L55M:L66M:K75Q:R78P:A81V:S93T:I97T:S99T:N102D:Y106F:K109R:K111R:Y120F:V123A:V125L:K131N:S132T:V141I:Y143H:H144R:A149V:I152V:R156H:M161L:K167M:V171L:M172L:A182T:K186R:A190V:E192K:E193D:L197Q:F207C:E215D	A2E:L3P:T4P:E5G:E11D:K12E:E19V:I30T:K32R:E34V:D38N:T51A:D54G:L55M:L66M:K75Q:R78P:A81V:S96T:I100T:S102T:N105D:Y109F:K112R:K114R:Y123F:V126A:V128L:K134N:S135T:V144I:Y146H:H147R:A152V:I155V:R159H:M164L:K170M:V174L:M175L:A185T:K189R:A193V:E195K:E196D:L203Q:F213C:E221D	cgre	48	24	7.164687	5.9436398	ATGACTGAACCGCCGGGCGGCGCGAAGCTGTTCGATGAGGAGATTCCCTATATCACCGTTCTGGAGGGCGACGTAGAGGGCATGAAGTTCACAATTCGTGGCGTAGGCACTGGCAACGCCACCACGGGCACCATCAAGGCGAAGTACATCTGCGCAACCGGCGGGATGCCCGTGCCCTGGGCTACCATCCTGTCATCCATGTCGTACGGCGTGTTTTGCTTCGCTCAGTACCCCCCGCACATTGTTGACTTCTTCAAGTCCACCCAACCCGATGGCTACACACAGGACCGCACGATCACGTTCGACGACGACGGCCAGTTCGACGTGCGCGCCCGCGTGACGTATGAGAACGGTACACTATTTAACCGCGCGACCTTAAAGGGCACTGGTTTCAATACA…	3	cgre48_1319	E9	4
MIERPVGAMLFDKEIPYVTELEGDVEGKKFTIKGVGTGDATTGTIRAKYICASGEMPVPWATILSSLSYGVFCFAQYPPHIVDFFKSTQPEGYSQDRIITFDNDGQFDVKARVTYENGTLYNRVTMKGTGFNTKGNIMGKRVSHHSPPHVVYVMPDRKNGGLMIEFNMVFDVLGGGHQMARHSQFNKPLGVWEEDYPQYHHLTVWTSCGKDPGDYDSDHLTIVEVIKAVDLETYR*	T1I:A2E:L3R:T4P:E5V:K8M:E11D:I17V:M27K:I30T:E34V:K45R:T51A:T52S:D54E:L55M:K75Q:R78P:A81V:D90E:S99T:Y106F:K111R:V125M:K131N:S132T:N133K:L137M:M139K:L142S:Y143H:A149V:I152V:L153M:M161L:K162M:Y165F:K167M:A168V:M172L:A182S:A190V:L197Q:F207C:D212G:D214Y:E215D:T216S	T1I:A2E:L3R:T4P:E5V:K8M:E11D:I17V:M27K:I30T:E34V:K45R:T51A:T52S:D54E:L55M:K75Q:R78P:A81V:D93E:S102T:Y109F:K114R:V128M:K134N:S135T:N136K:L140M:M142K:L145S:Y146H:A152V:I155V:L156M:M164L:K165M:Y168F:K170M:A171V:M175L:A185S:A193V:L203Q:F213C:D218G:D220Y:E221D:T222S	cgre	48	24	7.231022	5.978107	ATGATAGAACGCCCGGTCGGCGCGATGCTGTTCGACAAAGAGATTCCCTATGTTACCGAGCTGGAGGGCGACGTAGAGGGCAAAAAGTTCACGATTAAGGGCGTGGGCACTGGCGATGCCACCACGGGCACCATCCGTGCGAAGTACATCTGCGCAAGTGGCGAGATGCCCGTGCCCTGGGCTACCATCCTGTCATCCCTGTCGTACGGCGTGTTTTGCTTCGCTCAGTACCCCCCCCACATTGTAGACTTCTTCAAGTCCACCCAACCCGAGGGCTACAGTCAGGACCGCATCATCACATTCGACAATGACGGCCAGTTCGACGTGAAAGCCCGGGTGACGTATGAGAACGGTACACTATACAACCGCGTTACCATGAAGGGCACTGGTTTCAATACT…	3	cgre48_1414	F9	183
MAEPPEGAKLFDKEIPYVTELEGVVEGKKFTIKGVGTGNATTGTIRAKYICTTGDLPVPWASILSSLSYGVFCFAQYPPHIADFFKSTQPDGYSQDRTITFDNDGQFNVKAKVTFENGKLYNRVAVNGTGFNTNGNILGMRISHRSPPHVVYVLPDRKNGGMMIEYNMVFELLGGGHQMARHAQFNRPLGVWVDEYPQYHHLTVWTSCGKDPDDDDTDHLSVVEVIKAIDLETYR*	T1A:A2E:L3P:T4P:E11D:I17V:D23V:M27K:I30T:E34V:D38N:K45R:T61S:K75Q:R78P:I97T:S99T:Y106F:D107N:Y114F:T118K:T124A:K126N:K131N:S132T:V141I:L142S:Y143H:H144R:A149V:I152V:K162M:K167M:A168V:D170E:V171L:M172L:K186R:A190V:E192V:E193D:D194E:L197Q:F207C:E215D:T220S:I221V:V228I	T1A:A2E:L3P:T4P:E11D:I17V:D23V:M27K:I30T:E34V:D38N:K45R:T61S:K75Q:R78P:I100T:S102T:Y109F:D110N:Y117F:T121K:T127A:K129N:K134N:S135T:V144I:L145S:Y146H:H147R:A152V:I155V:K165M:K170M:A171V:D173E:V174L:M175L:K189R:A193V:E195V:E196D:D197E:L203Q:F213C:E221D:T226S:I227V:V234I	cgre	48	23	7.1162553	5.8875175	ATGGCCGAGCCACCCGAAGGCGCGAAGCTGTTCGATAAAGAGATTCCCTATGTCACCGAGCTGGAGGGCGTTGTAGAGGGCAAGAAGTTCACTATTAAGGGCGTTGGCACTGGCAATGCCACCACGGGCACCATCCGCGCGAAGTACATCTGCACCACCGGCGACCTGCCCGTGCCCTGGGCTTCAATCCTGTCATCCCTGTCGTACGGCGTGTTTTGCTTCGCTCAGTACCCCCCACACATTGCGGACTTCTTCAAGTCCACCCAACCCGATGGCTACAGTCAGGACCGCACTATCACCTTCGACAATGACGGCCAGTTTAATGTGAAAGCCAAAGTGACGTTCGAGAACGGTAAACTATACAACCGCGTTGCGGTGAACGGCACTGGTTTCAACACA…	3	cgre48_1770	G9	5
MAEPPVGAKLFDEVIPYITELEGDVEGLKFIIRGVGTGDATTGTIKAKYICATGDLPVPWATILSSLSYGVFCFAQYPPHIVDFFKSTQPDGYTQDRTITFDNDGQFDVKAKVTFENGKIYNRANEKGTGFNSKGNILGMRVLYRSPPHVVYVLPDRTNGGVKIEYNMVFEVLGGDHQMARHSQFNRPLGVWVDDYPPYHHLTVWTRFGKDPDDYDTDHLTIIEVIKAVDLETYS*	T1A:A2E:L3P:T4P:E5V:E11D:K12E:E13V:M27L:K32R:E34V:T51A:K75Q:R78P:A81V:S93T:I97T:S99T:Y106F:Y114F:T118K:L119I:V123A:T124N:V125E:K131N:N133K:H144R:A149V:I152V:K157T:M161V:K167M:A168V:D170E:M172L:G175D:A182S:K186R:A190V:E192V:E193D:L197P:S206R:D214Y:E215D:V222I:R234S	T1A:A2E:L3P:T4P:E5V:E11D:K12E:E13V:M27L:K32R:E34V:T51A:K75Q:R78P:A81V:S96T:I100T:S102T:Y109F:Y117F:T121K:L122I:V126A:T127N:V128E:K134N:N136K:H147R:A152V:I155V:K160T:M164V:K170M:A171V:D173E:M175L:G178D:A185S:K189R:A193V:E195V:E196D:L203P:S212R:D220Y:E221D:V228I:R245S	cgre	48	21	6.2978663	5.5568547	ATGGCGGAACCGCCAGTAGGCGCGAAGCTGTTCGATGAGGTTATTCCCTATATCACCGAGCTGGAGGGCGACGTAGAGGGCTTGAAGTTCATCATTCGGGGCGTCGGCACTGGCGATGCCACCACGGGCACCATCAAGGCGAAGTACATCTGCGCGACCGGCGACCTGCCCGTGCCCTGGGCTACCATCCTGTCATCCCTGTCGTACGGCGTGTTTTGCTTCGCTCAATACCCCCCCCACATTGTTGACTTCTTCAAGTCCACCCAACCCGATGGCTACACACAGGACCGCACAATCACGTTCGACAATGACGGCCAGTTCGACGTGAAAGCCAAAGTGACGTTTGAGAACGGTAAGATATACAACCGCGCCAACGAAAAGGGCACTGGTTTCAATTCA…	3	cgre48_2098	H9	4
