# Supplementary material for: Heterogeneity of the GFP fitness landscape and data-driven protein design
Source: eLife. 2022 May 5;11:e75842. doi: 10.7554/eLife.75842 (PMC9119679; doi:10.7554/eLife.75842)
Supplement: Source data 10. [file elife-75842-data10.xlsx]

## Sheet: Sheet1
Branch	Nodes	# syn	# subs	# non-subs	dn	ds	average dn	average ds
1	69..1	64.5	15	86	0.148515	0.294521	0.0567339	0.110631
2	69..68	15.5	3	107	0.0272727	0.0707763
3	69..70	53.7	21	66	0.241379	0.245205
4	70..71	7	2	96	0.0204082	0.0319635
5	71..72	27	7	74	0.0864198	0.123288
6	72..73	40.5	6	69	0.08	0.184932
7	73..74	121.8	6	26	0.1875	0.556164
8	74..75	21	2	43	0.0444444	0.0958904
9	75..76	4.5	1	49	0.02	0.0205479
10	76..77	23.5	1	47	0.0208333	0.107306
11	77..78	33.5	1	40	0.0243902	0.152968
12	78..79	53	4	36	0.1	0.242009
13	79..80	22	0	46	0	0.100457
14	80..81	14	5	38	0.116279	0.0639269
15	81..82	63.8	3	33	0.0833333	0.291324
16	82..83	4	0	48	0	0.0182648
17	83..2	11.5	1	35	0.0277778	0.0525114
18	83..84	9.5	2	44	0.0434783	0.043379
19	84..43	4	0	41	0	0.0182648
20	84..44	0	0	42	0	0
21	84..45	0	0	42	0	0
22	82..85	5	1	46	0.0212766	0.0228311
23	85..86	0	0	47	0	0
24	86..87	4	0	46	0	0.0182648
25	87..3	1	0	40	0	0.00456621
26	87..4	5	0	37	0	0.0228311
27	86..7	4	0	40	0	0.0182648
28	85..6	2	0	40	0	0.00913242
29	81..88	18	1	47	0.0208333	0.0821918
30	88..18	16.5	2	37	0.0512821	0.0753425
31	88..34	21	4	29	0.121212	0.0958904
32	80..89	15	1	50	0.0196078	0.0684932
33	89..90	50.8	2	36	0.0526316	0.231963
34	90..91	31	0	39	0	0.141553
35	91..14	6.5	0	37	0	0.0296804
36	91..92	4	3	41	0.0681818	0.0182648
37	92..93	9	2	41	0.0465116	0.0410959
38	93..94	10	0	44	0	0.0456621
39	94..95	15	0	42	0	0.0684932
40	95..26	5	0	44	0	0.0228311
41	95..37	11	1	36	0.027027	0.0502283
42	94..40	14	2	38	0.05	0.0639269
43	93..51	17	1	36	0.027027	0.0776256
44	92..52	2	0	40	0	0.00913242
45	90..96	14.5	1	37	0.0263158	0.06621
46	96..97	9	1	35	0.0277778	0.0410959
47	97..46	2	1	32	0.030303	0.00913242
48	97..47	1	1	29	0.0333333	0.00456621
49	96..50	9	1	33	0.0294118	0.0410959
50	89..16	41	5	25	0.166667	0.187215
51	79..98	31.5	6	33	0.153846	0.143836
52	98..11	28.8	4	27	0.129032	0.131507
53	98..49	26.5	3	29	0.09375	0.121005
54	78..99	34	5	44	0.102041	0.155251
55	99..5	45.7	2	25	0.0740741	0.208676
56	99..100	11	0	48	0	0.0502283
57	100..101	3	0	51	0	0.0136986
58	101..102	3	0	49	0	0.0136986
59	102..103	1.5	0	49	0	0.00684932
60	103..104	6.3	0	48	0	0.0287671
61	104..105	1	1	47	0.0208333	0.00456621
62	105..106	3	0	50	0	0.0136986
63	106..8	21.8	2	31	0.0606061	0.0995434
64	106..107	17	2	44	0.0434783	0.0776256
65	107..9	17	1	37	0.0263158	0.0776256
66	107..12	12	0	39	0	0.0547945
67	105..108	0	0	50	0	0
68	108..109	23.5	2	39	0.0487805	0.107306
69	109..10	18	2	29	0.0645161	0.0821918
70	109..15	22	0	27	0	0.100457
71	108..30	13	2	32	0.0588235	0.0593607
72	104..110	4.5	2	45	0.0425532	0.0205479
73	110..41	14.5	2	29	0.0645161	0.06621
74	110..111	9	0	42	0	0.0410959
75	111..54	28.9	3	28	0.0967742	0.131963
76	111..112	5	1	44	0.0222222	0.0228311
77	112..55	31	3	30	0.0909091	0.141553
78	112..56	31	2	31	0.0606061	0.141553
79	103..13	26	1	34	0.0285714	0.118721
80	102..113	7.5	0	48	0	0.0342466
81	113..114	28	1	45	0.0217391	0.127854
82	114..115	6	0	50	0	0.0273973
83	115..17	13	1	38	0.025641	0.0593607
84	115..36	26.2	2	33	0.0571429	0.119635
85	114..29	27.5	3	35	0.0789474	0.125571
86	113..116	64.7	3	31	0.0882353	0.295434
87	116..117	4	0	41	0	0.0182648
88	117..28	23	1	29	0.0333333	0.105023
89	117..42	12	1	34	0.0285714	0.0547945
90	116..31	8.5	2	31	0.0606061	0.0388128
91	101..118	38.8	7	31	0.184211	0.177169
92	118..32	27.2	3	35	0.0789474	0.124201
93	118..33	11	1	42	0.0232558	0.0502283
94	100..48	39.5	4	26	0.133333	0.180365
95	78..119	21	2	47	0.0408163	0.0958904
96	119..120	75.2	4	33	0.108108	0.343379
97	120..121	20	1	43	0.0227273	0.0913242
98	121..22	7.8	5	32	0.135135	0.0356164
99	121..23	29.4	3	31	0.0882353	0.134247
100	120..27	21	2	27	0.0689655	0.0958904
101	119..122	101.1	2	23	0.08	0.461644
102	122..24	45.5	2	30	0.0625	0.207763
103	122..25	89	5	23	0.178571	0.406393
104	77..53	55.8	4	26	0.133333	0.254795
105	76..123	7	2	46	0.0416667	0.0319635
106	123..38	20.5	2	35	0.0540541	0.0936073
107	123..39	11	1	40	0.0243902	0.0502283
108	75..35	17.5	4	32	0.111111	0.0799087
109	74..124	113.2	5	17	0.227273	0.516895
110	124..125	38.5	4	24	0.142857	0.175799
111	125..126	5	0	32	0	0.0228311
112	126..60	1	0	26	0	0.00456621
113	126..61	4	0	26	0	0.0182648
114	125..127	38	0	28	0	0.173516
115	127..128	28	1	27	0.0357143	0.127854
116	128..62	26.7	1	19	0.05	0.121918
117	128..129	35	1	27	0.0357143	0.159817
118	129..63	6	0	28	0	0.0273973
119	129..64	14	3	22	0.12	0.0639269
120	127..65	36.3	0	21	0	0.165753
121	124..67	68.8	5	14	0.263158	0.314155
122	73..21	46	8	28	0.222222	0.210046
123	72..130	68.5	11	47	0.189655	0.312785
124	130..58	61	3	42	0.0666667	0.278539
125	130..59	6	5	60	0.0769231	0.0273973
126	71..131	30	2	83	0.0235294	0.136986
127	131..19	52.4	14	46	0.233333	0.239269
128	131..132	66.7	5	40	0.111111	0.304566
129	132..20	69.8	4	39	0.0930233	0.318721
130	132..66	12	0	55	0	0.0547945
131	70..57	61.2	11	43	0.203704	0.279452
